# Supplementary material for: Mapping and sequencing of structural variation from eight human genomes
Source: Springer Nature journal article supplement (doi:10.1038/nature06862), 2008-04-30

SUPPLEMENTARY INFORMATION

---

**Figure S3. End-sequence mapping of fosmids against the human genome.** All discordant fosmids mapping to the human genome are displayed individually for each library using the following color scheme: ABC7=green, ABC8=forestgreen, ABC10=blue, ABC13=cyan, G248=black, ABC9=purple, ABC11=red, ABC12=orange, and ABC14=hotpink. The end-sequence placements are mapped in the context of gaps within the assembly (purple) and segmental duplications (grey bars). We required two or more discordant fosmids within an individual library in order to select a region for further characterization (predicted sites are represented by black bars, yellow bars indicate that a site was validated). Chromosome-wide maps are shown for putative a) deletions b) insertions and c) inversions. For the insertion map, we also show the location of one-end anchored clones as blue and gold vertical lines. The coordinates of all discordant sites as well as an interactive version of this map can be obtained via (<http://hgsv.washington.edu>).

Figure S3 a)  
Deletions

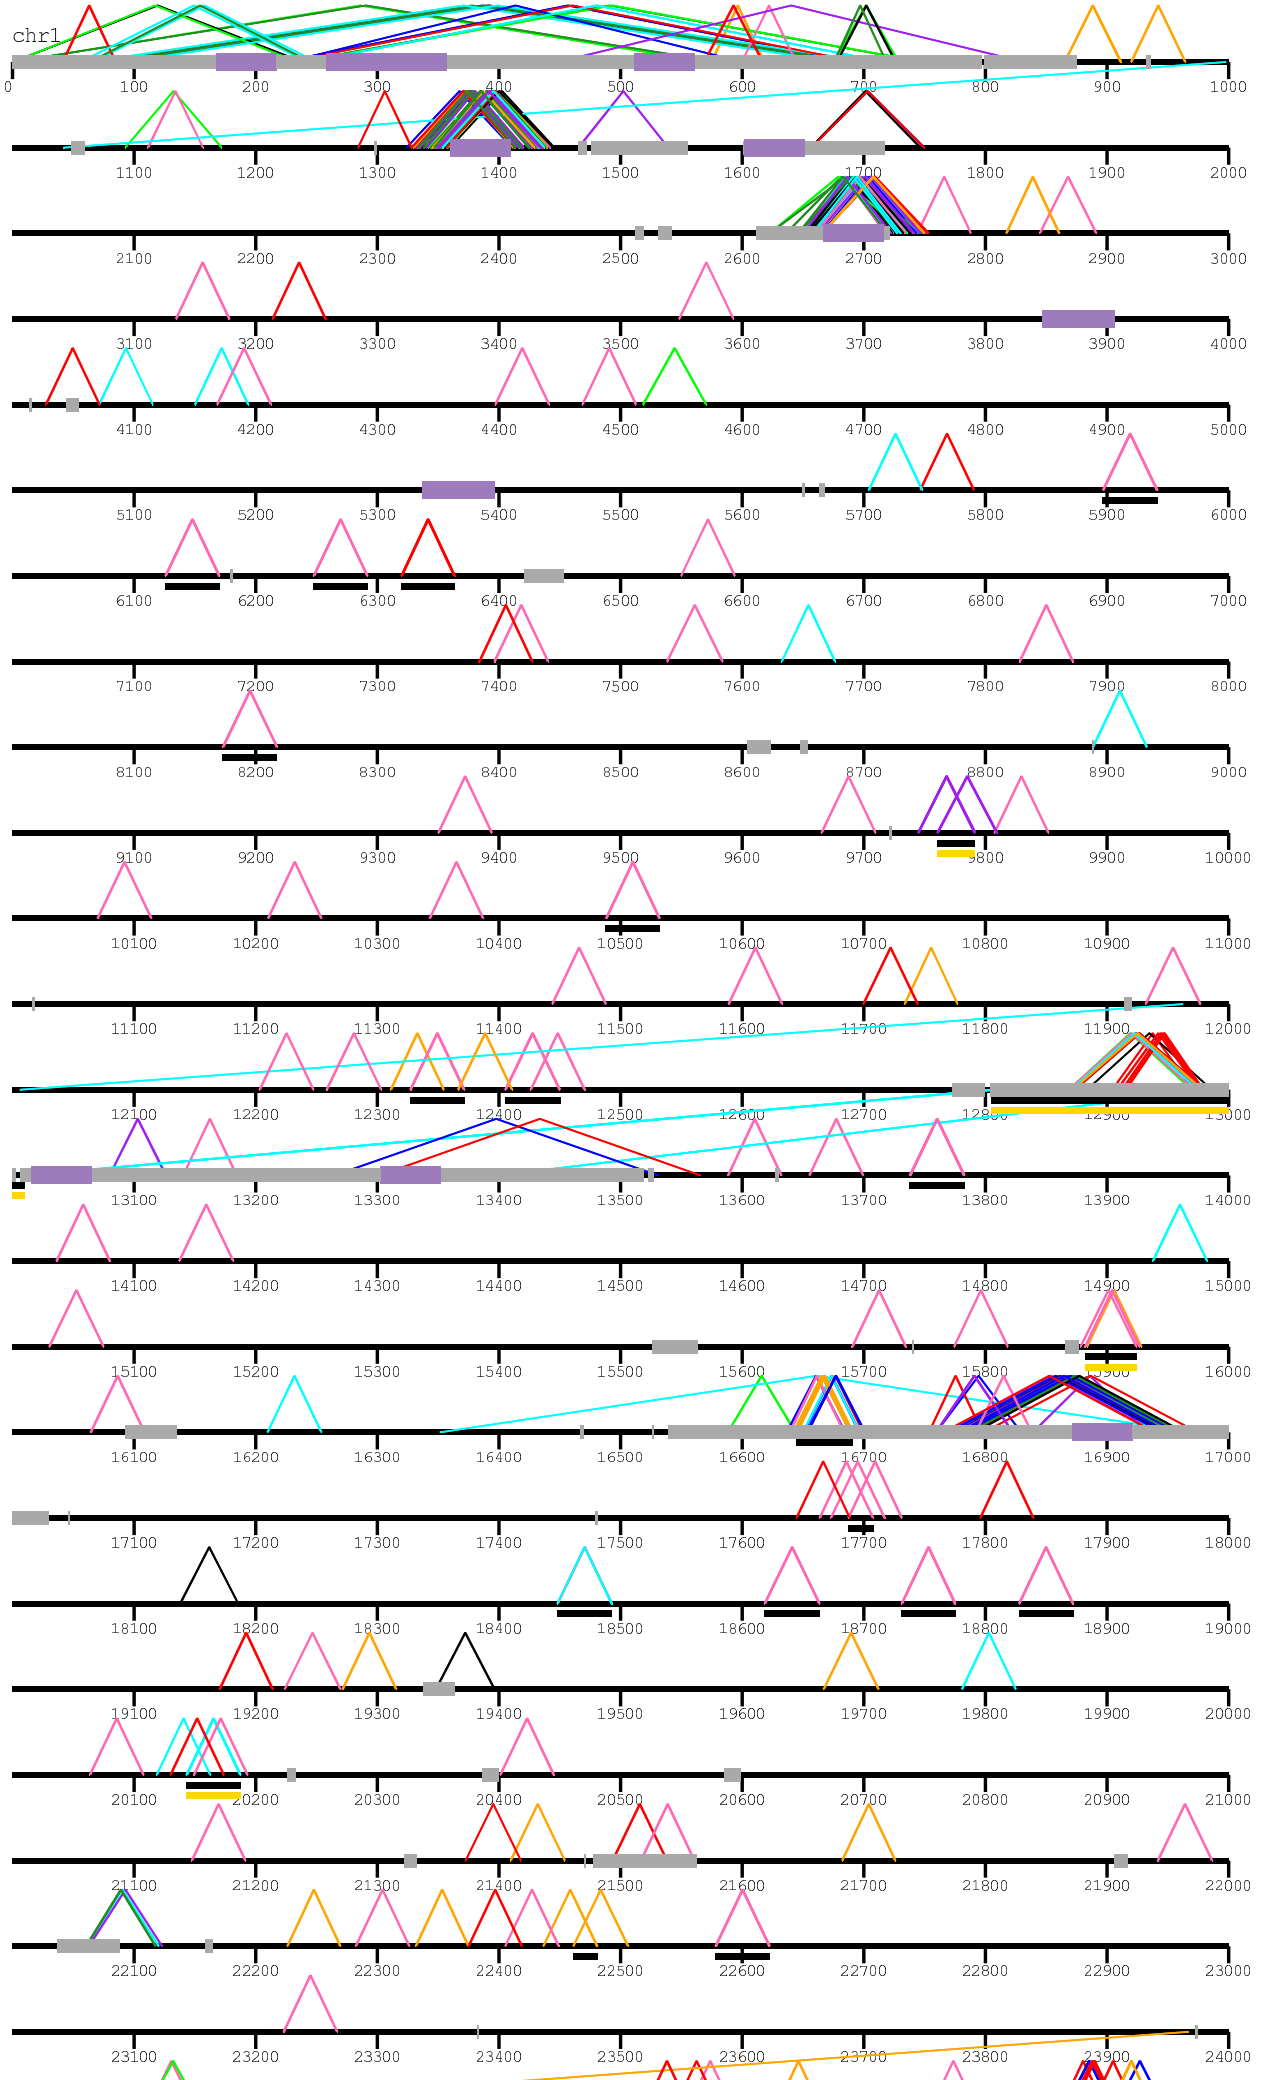

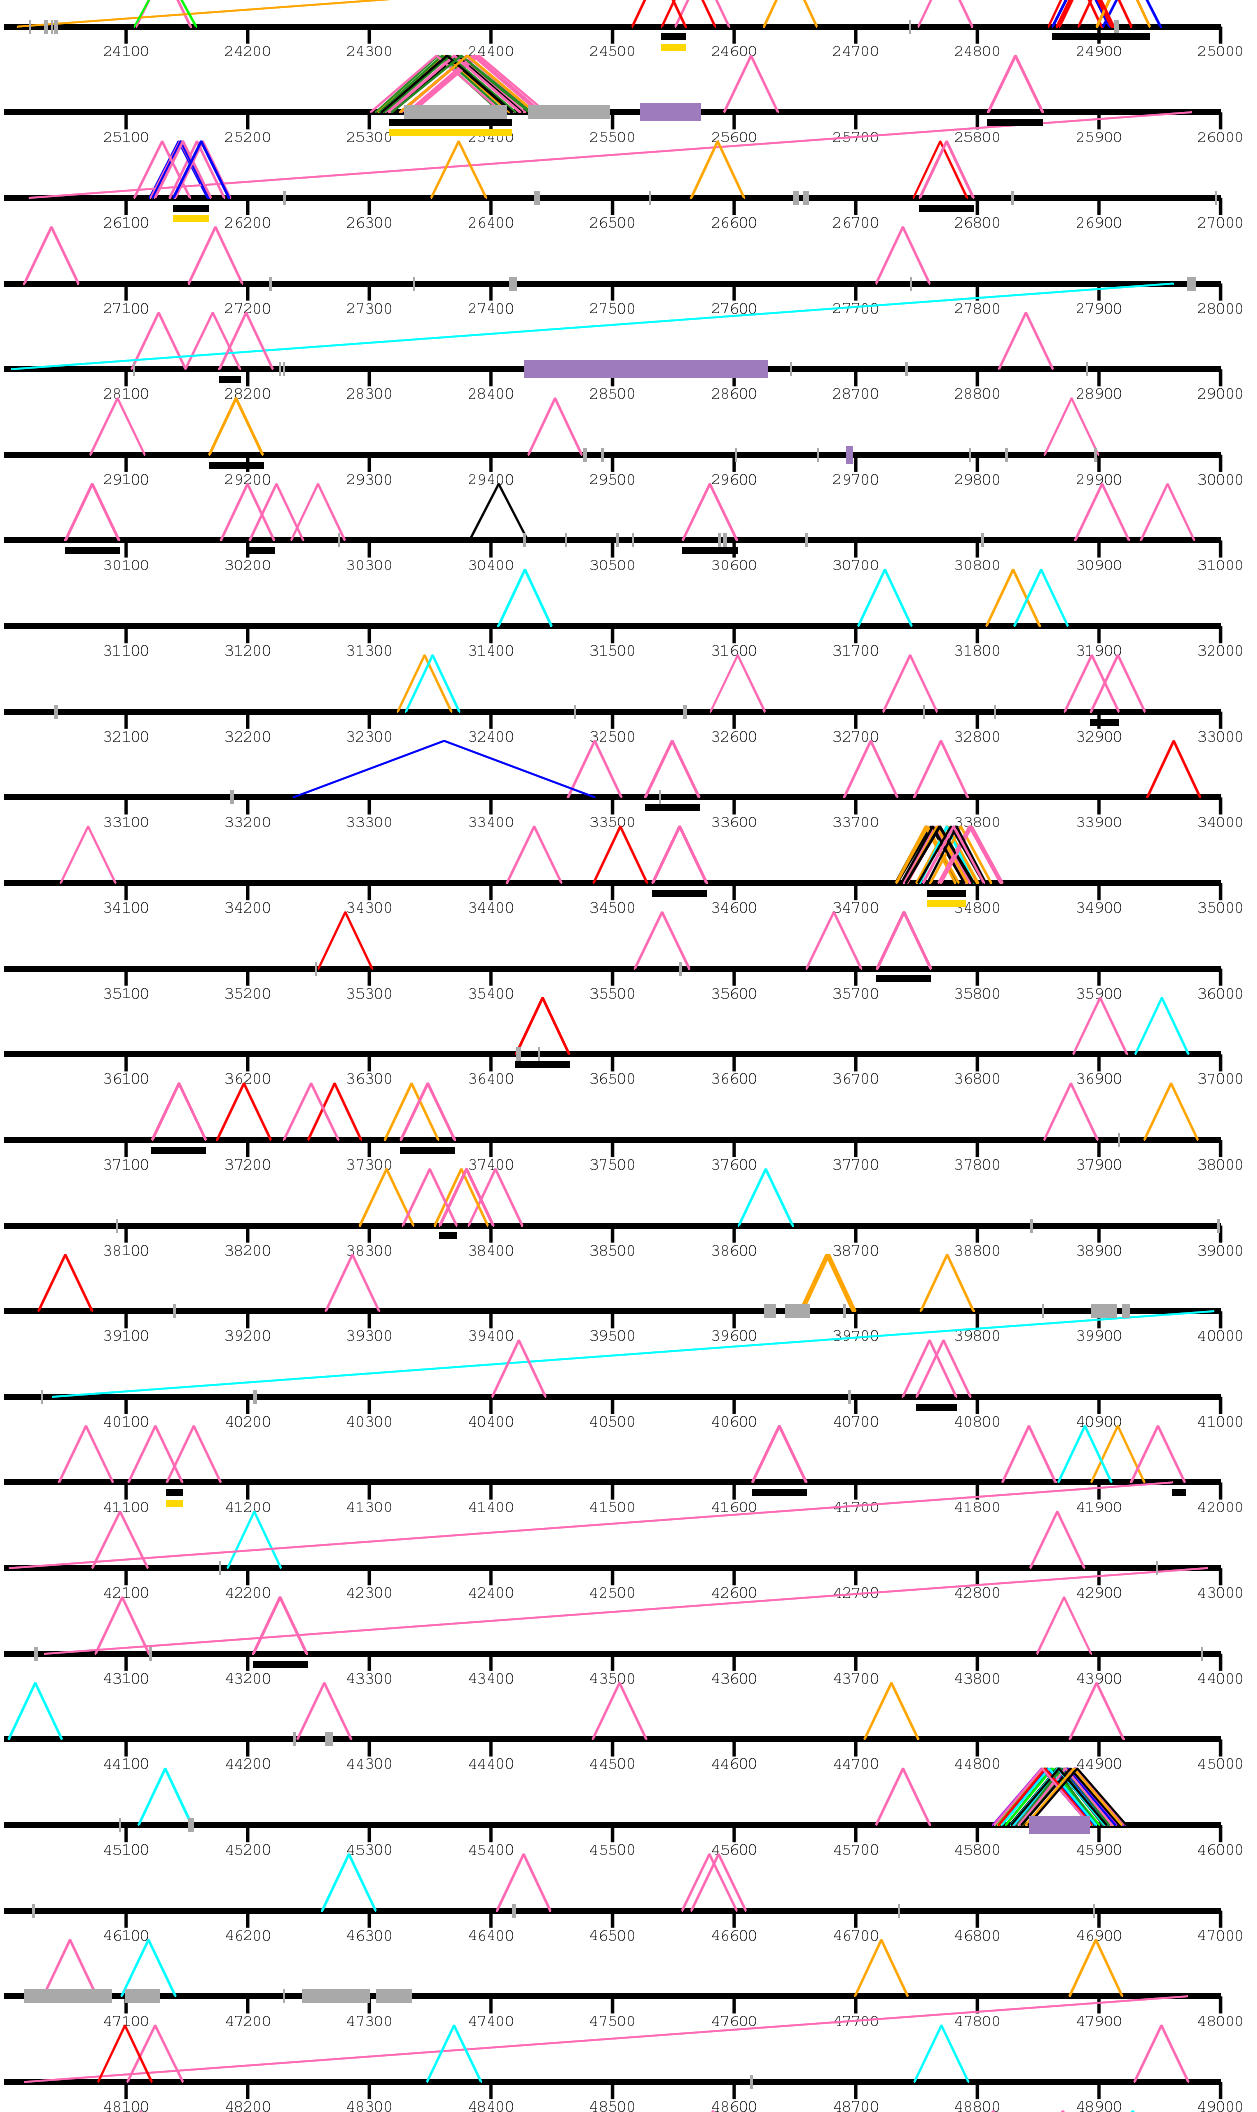

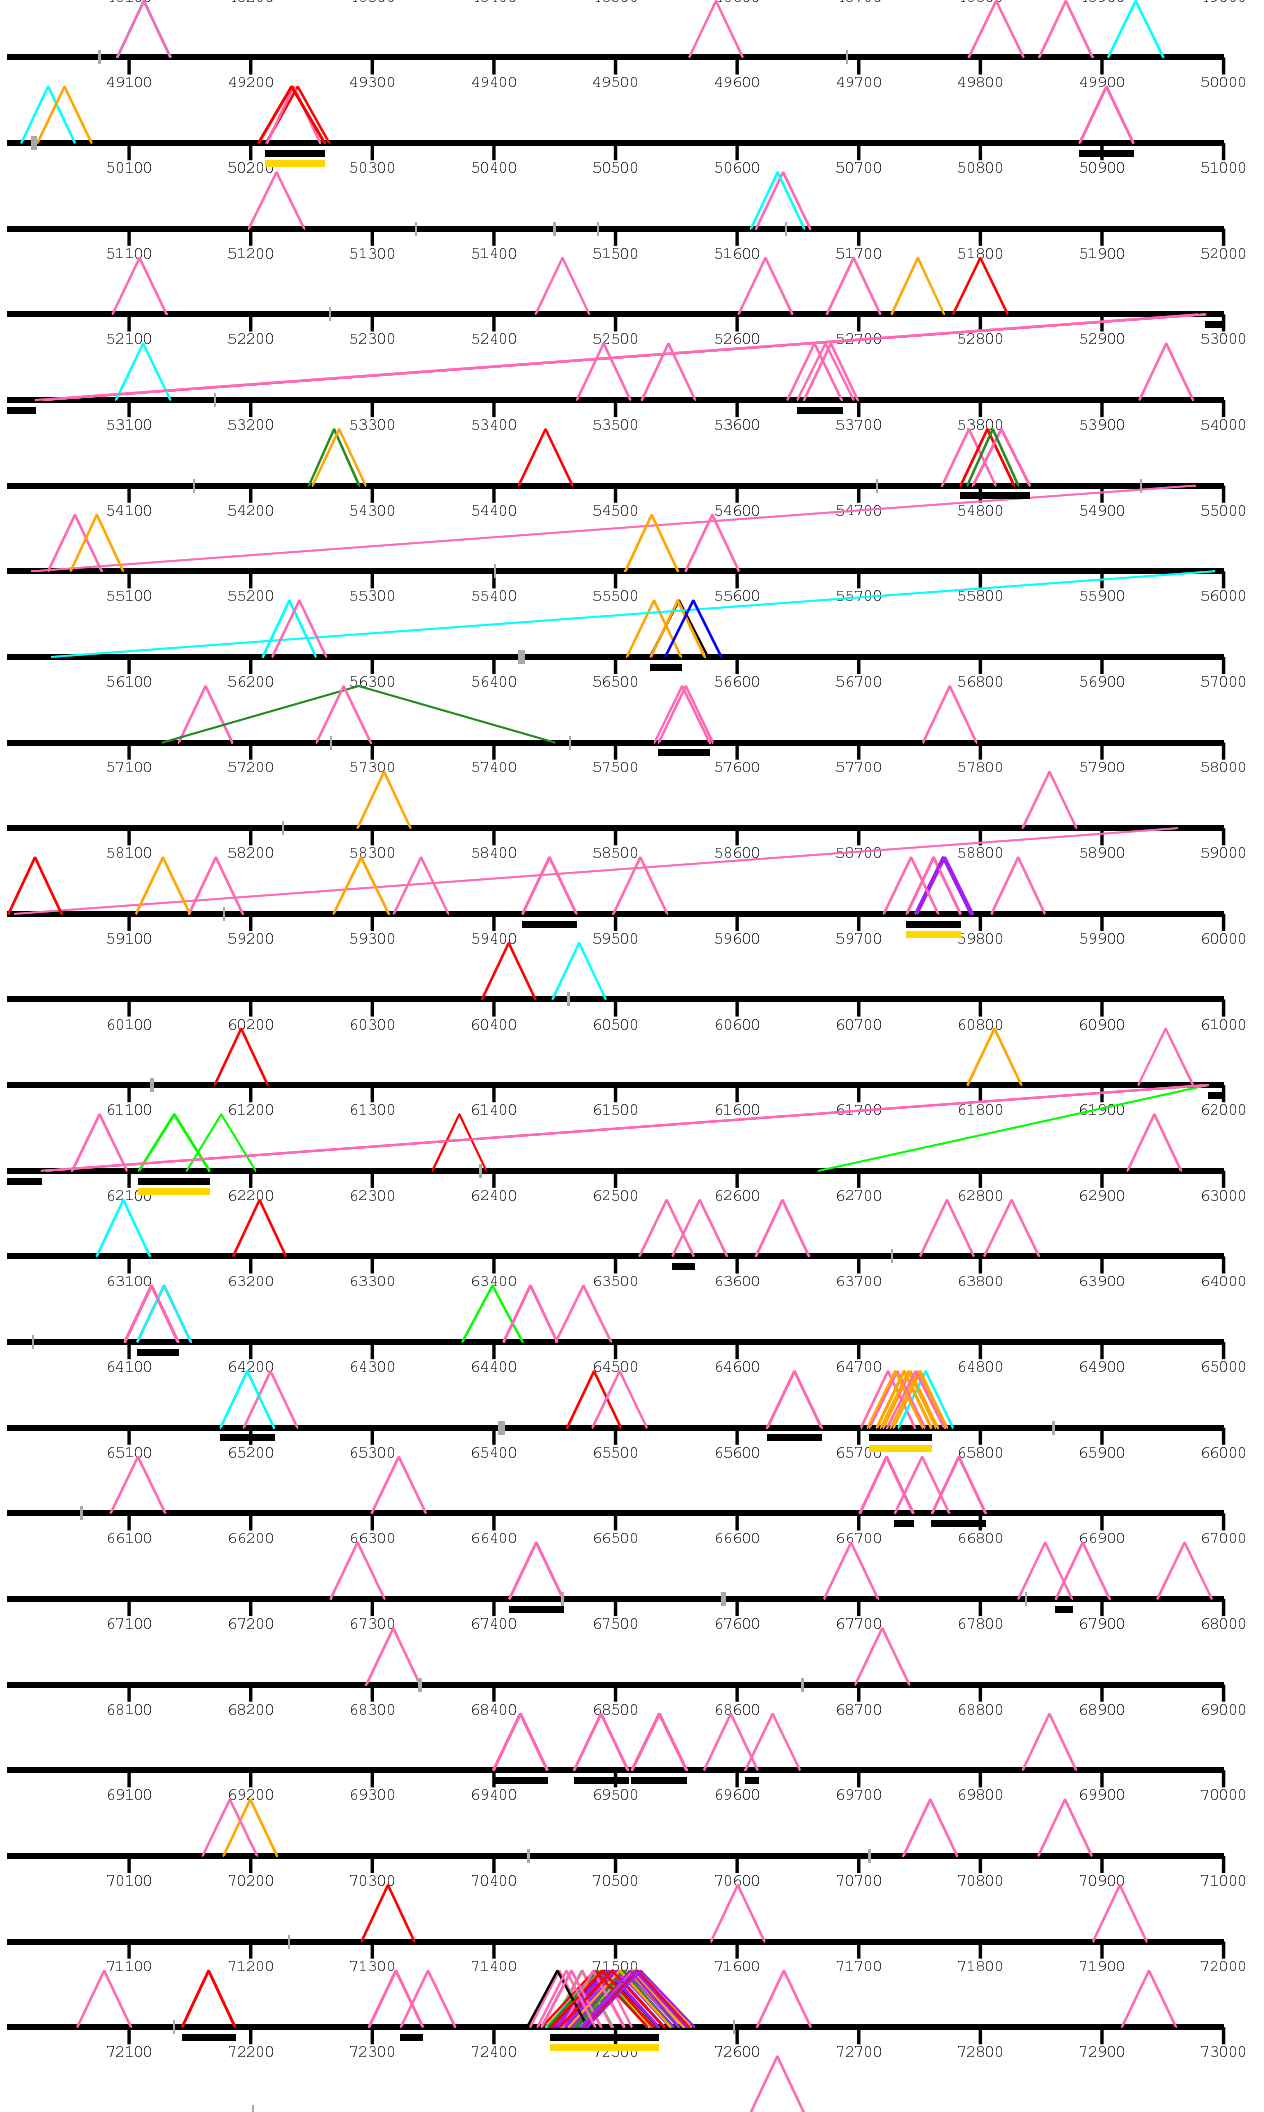

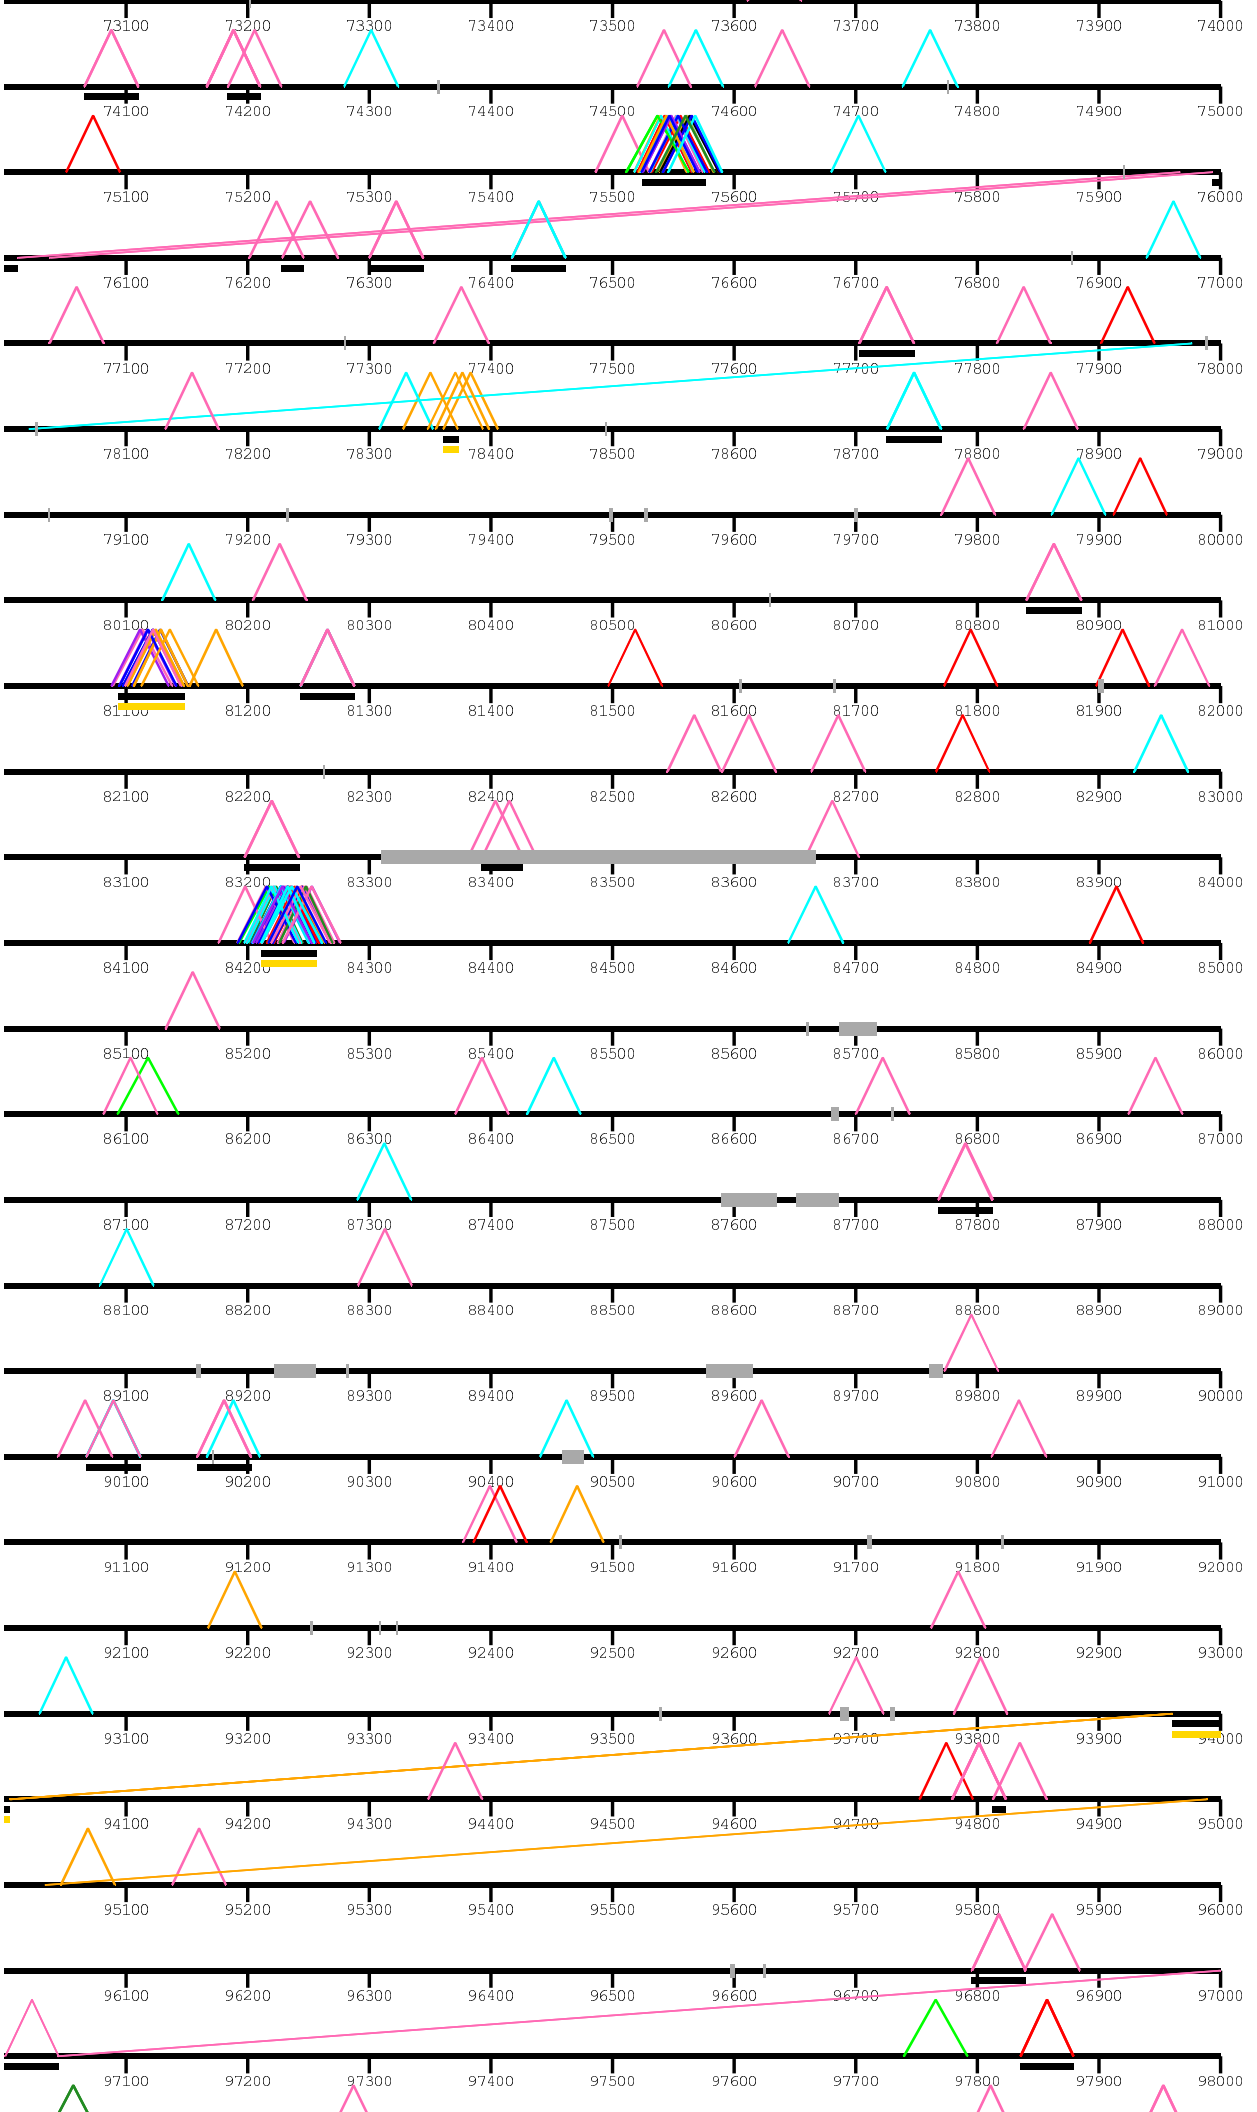

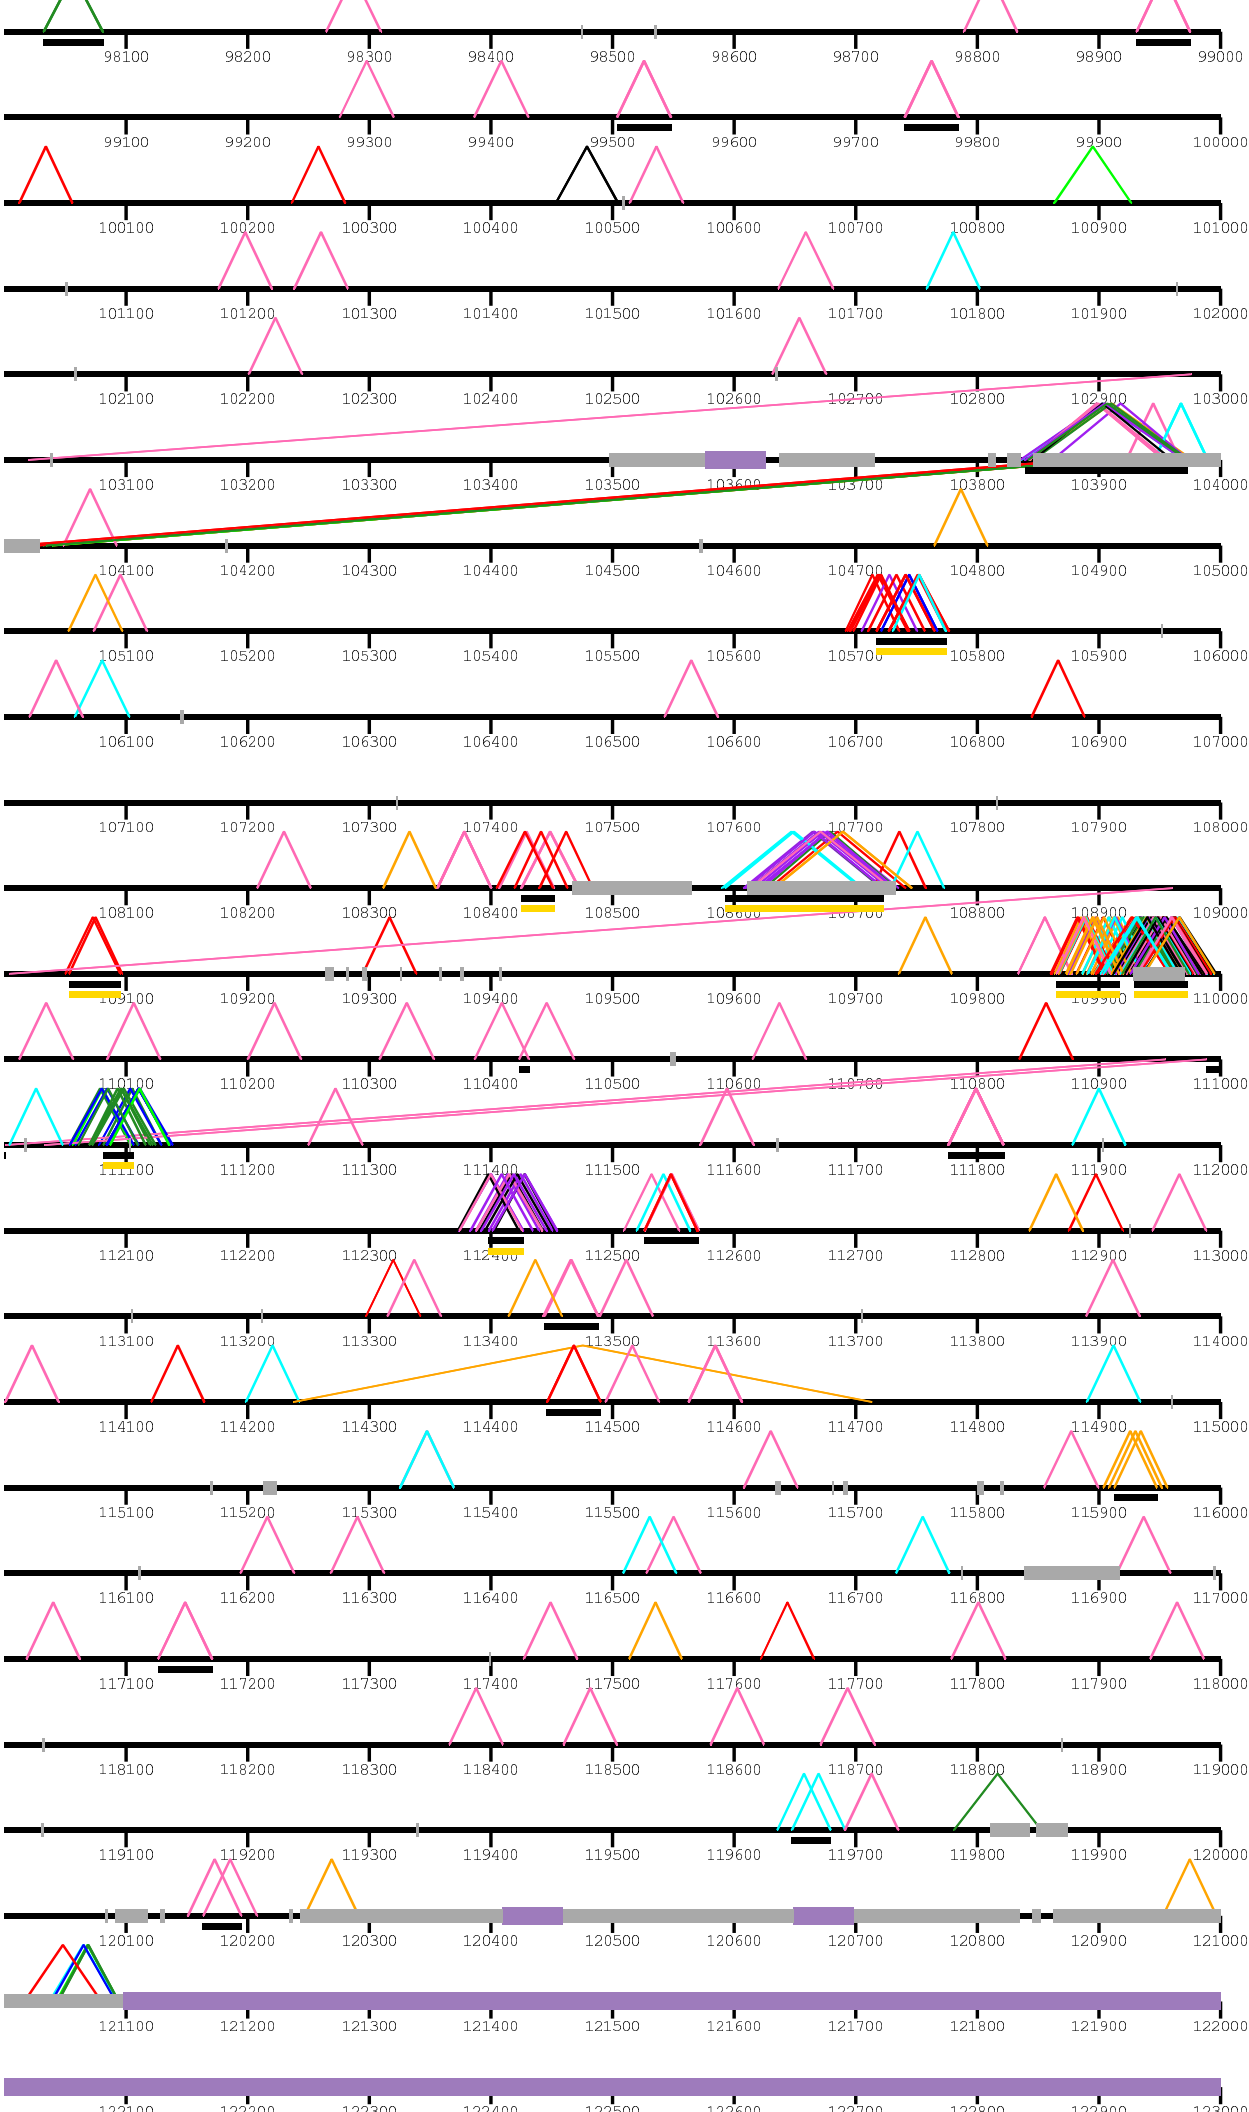

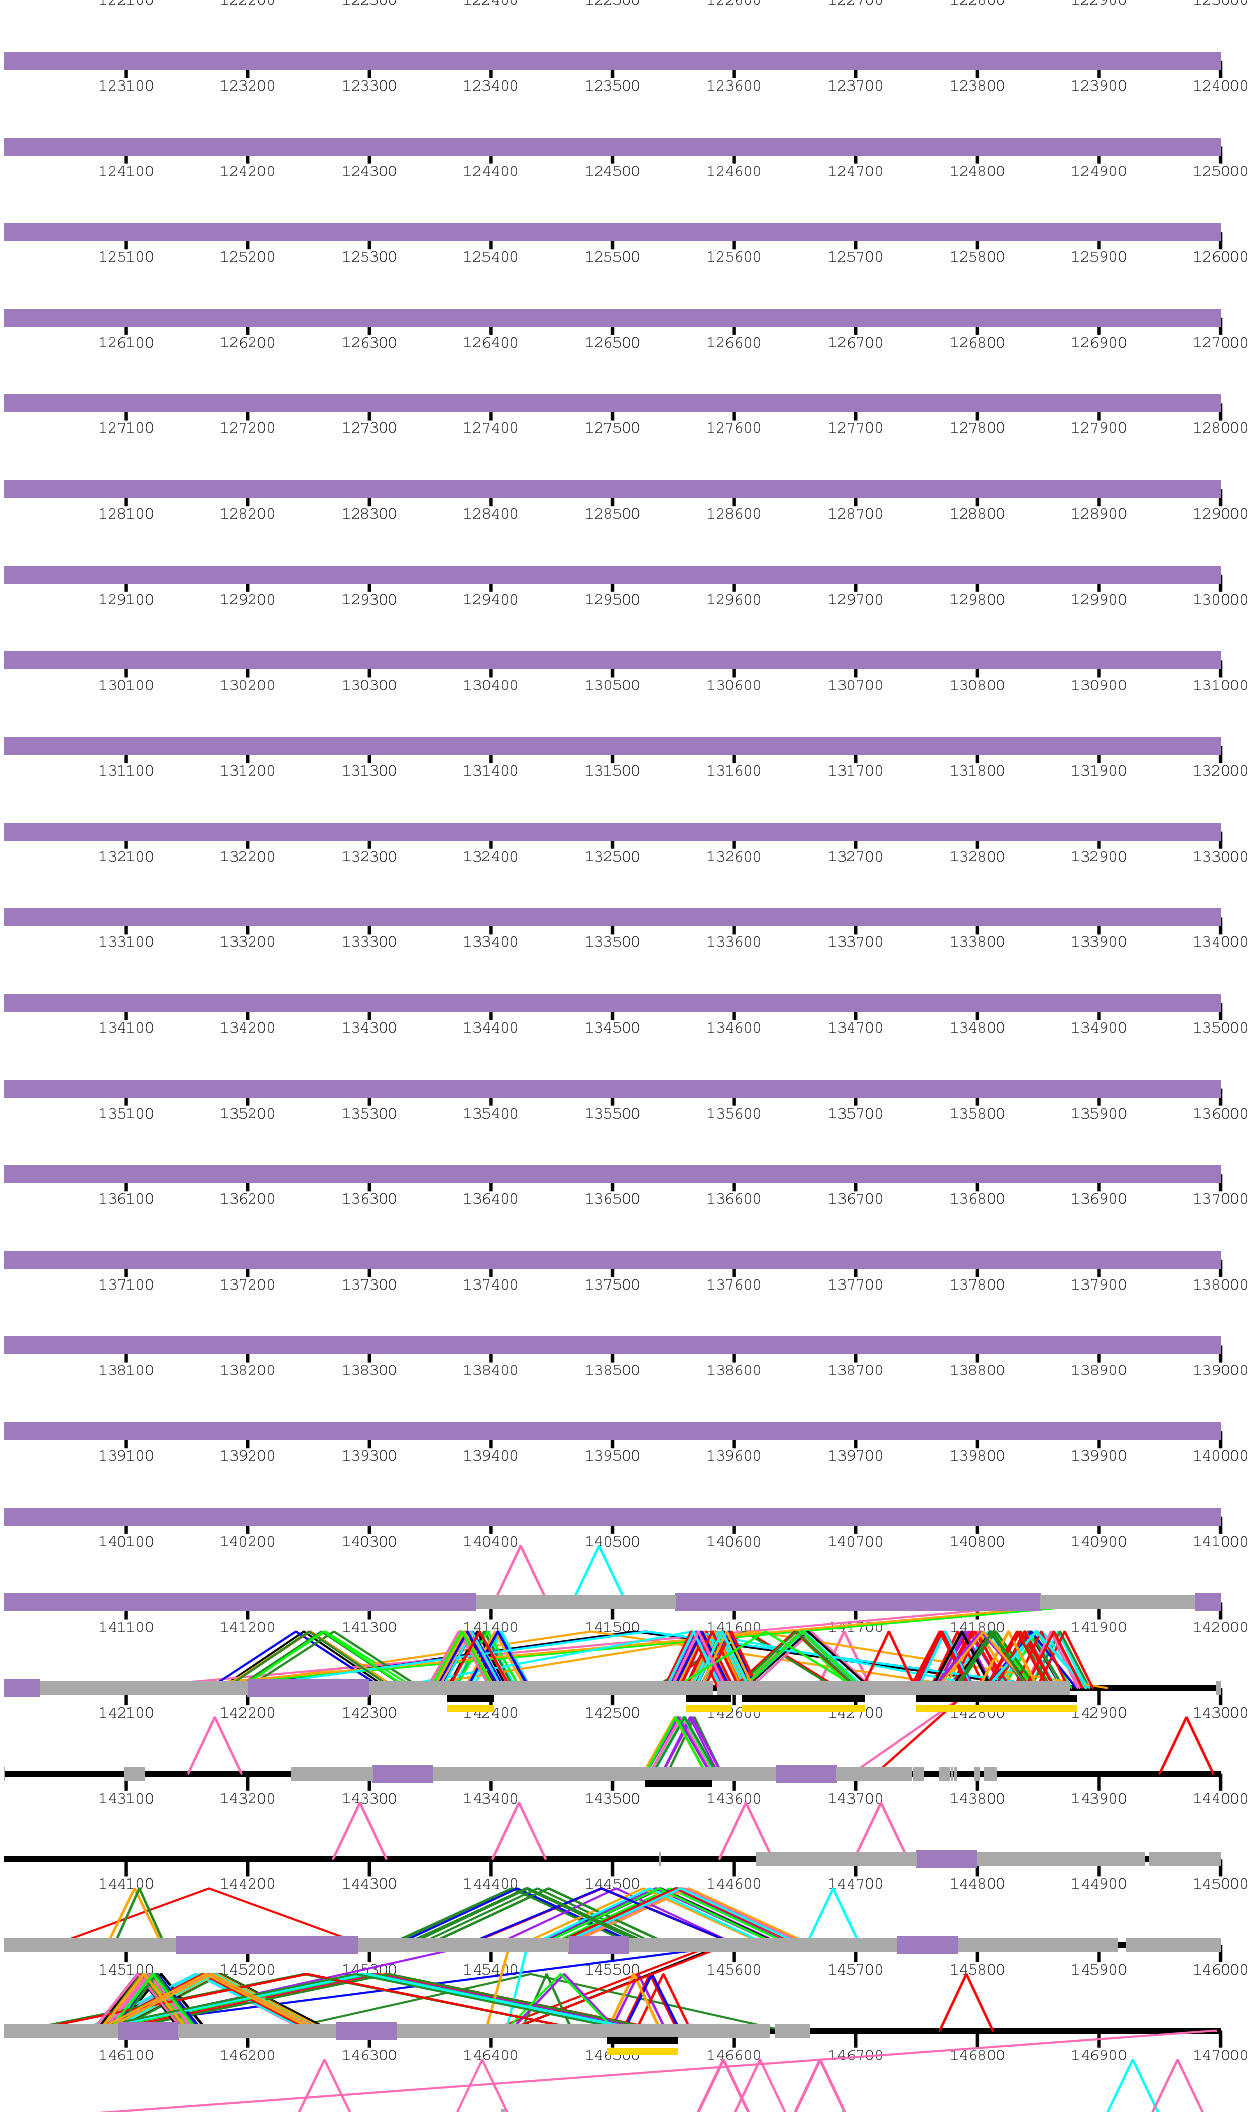

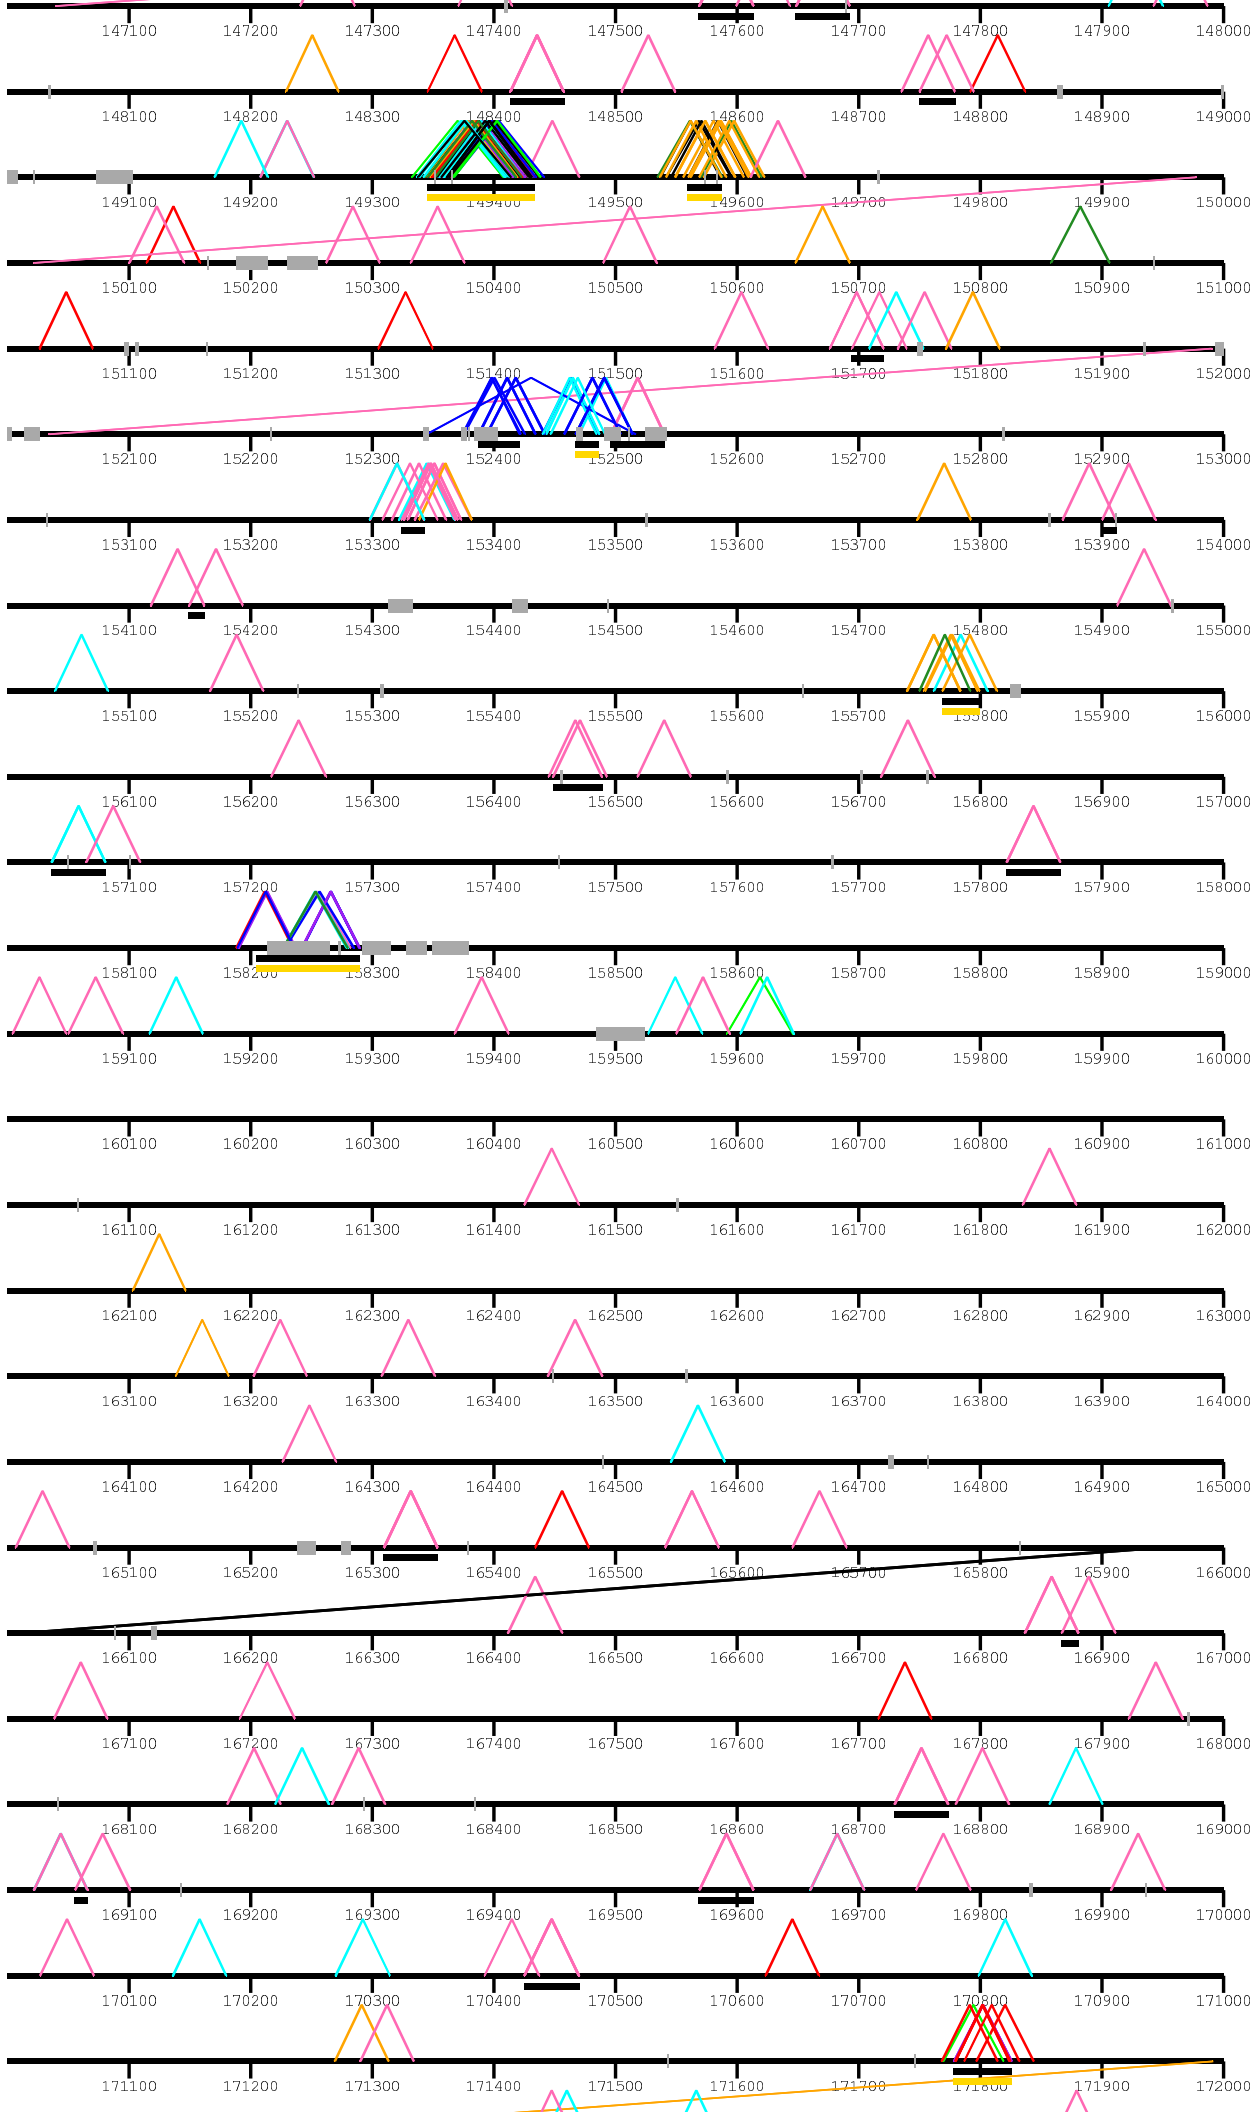



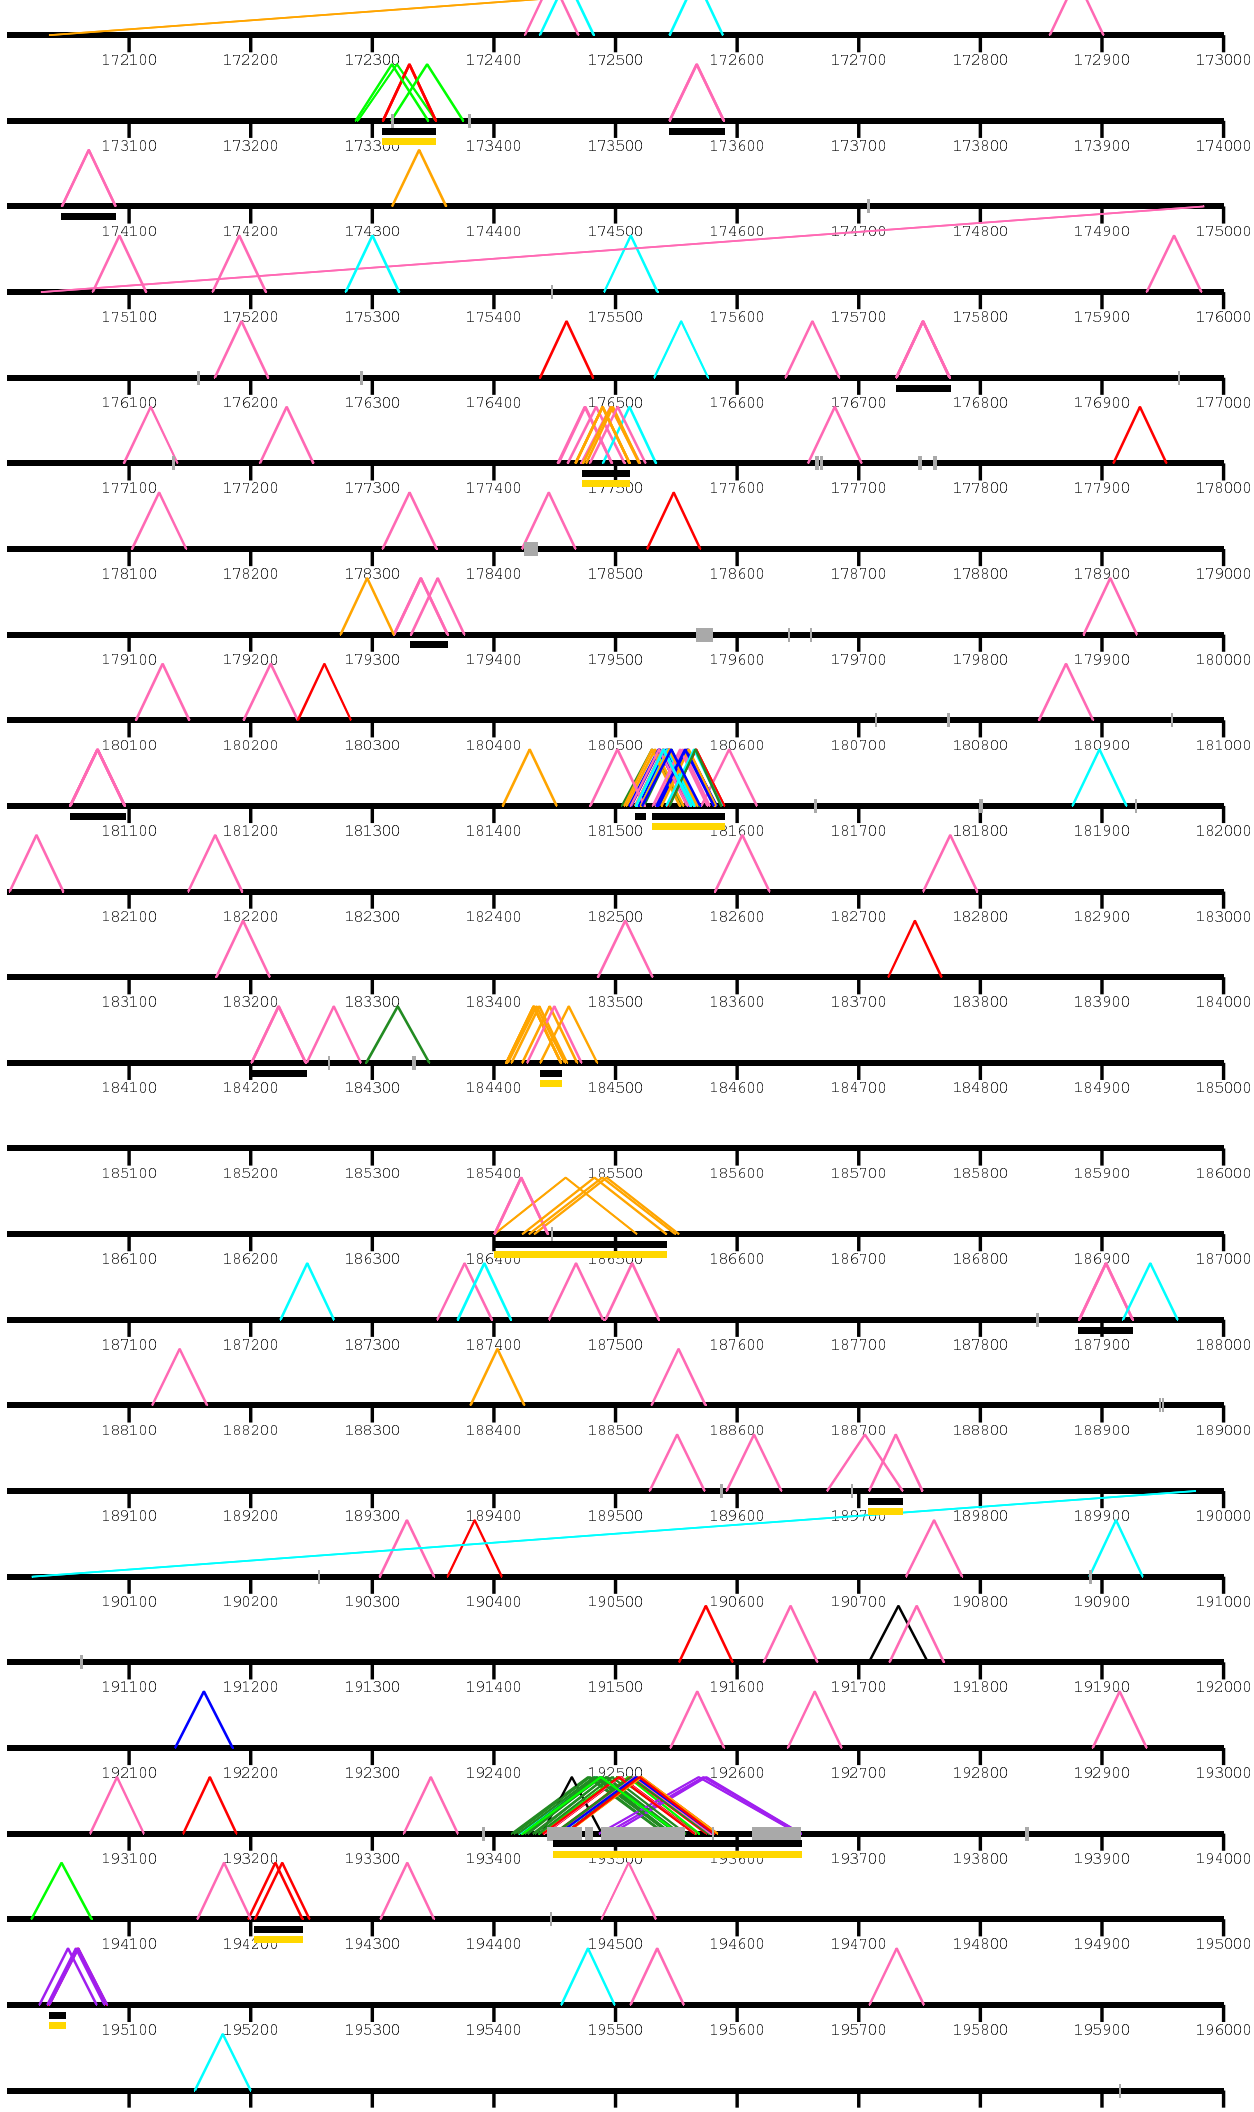

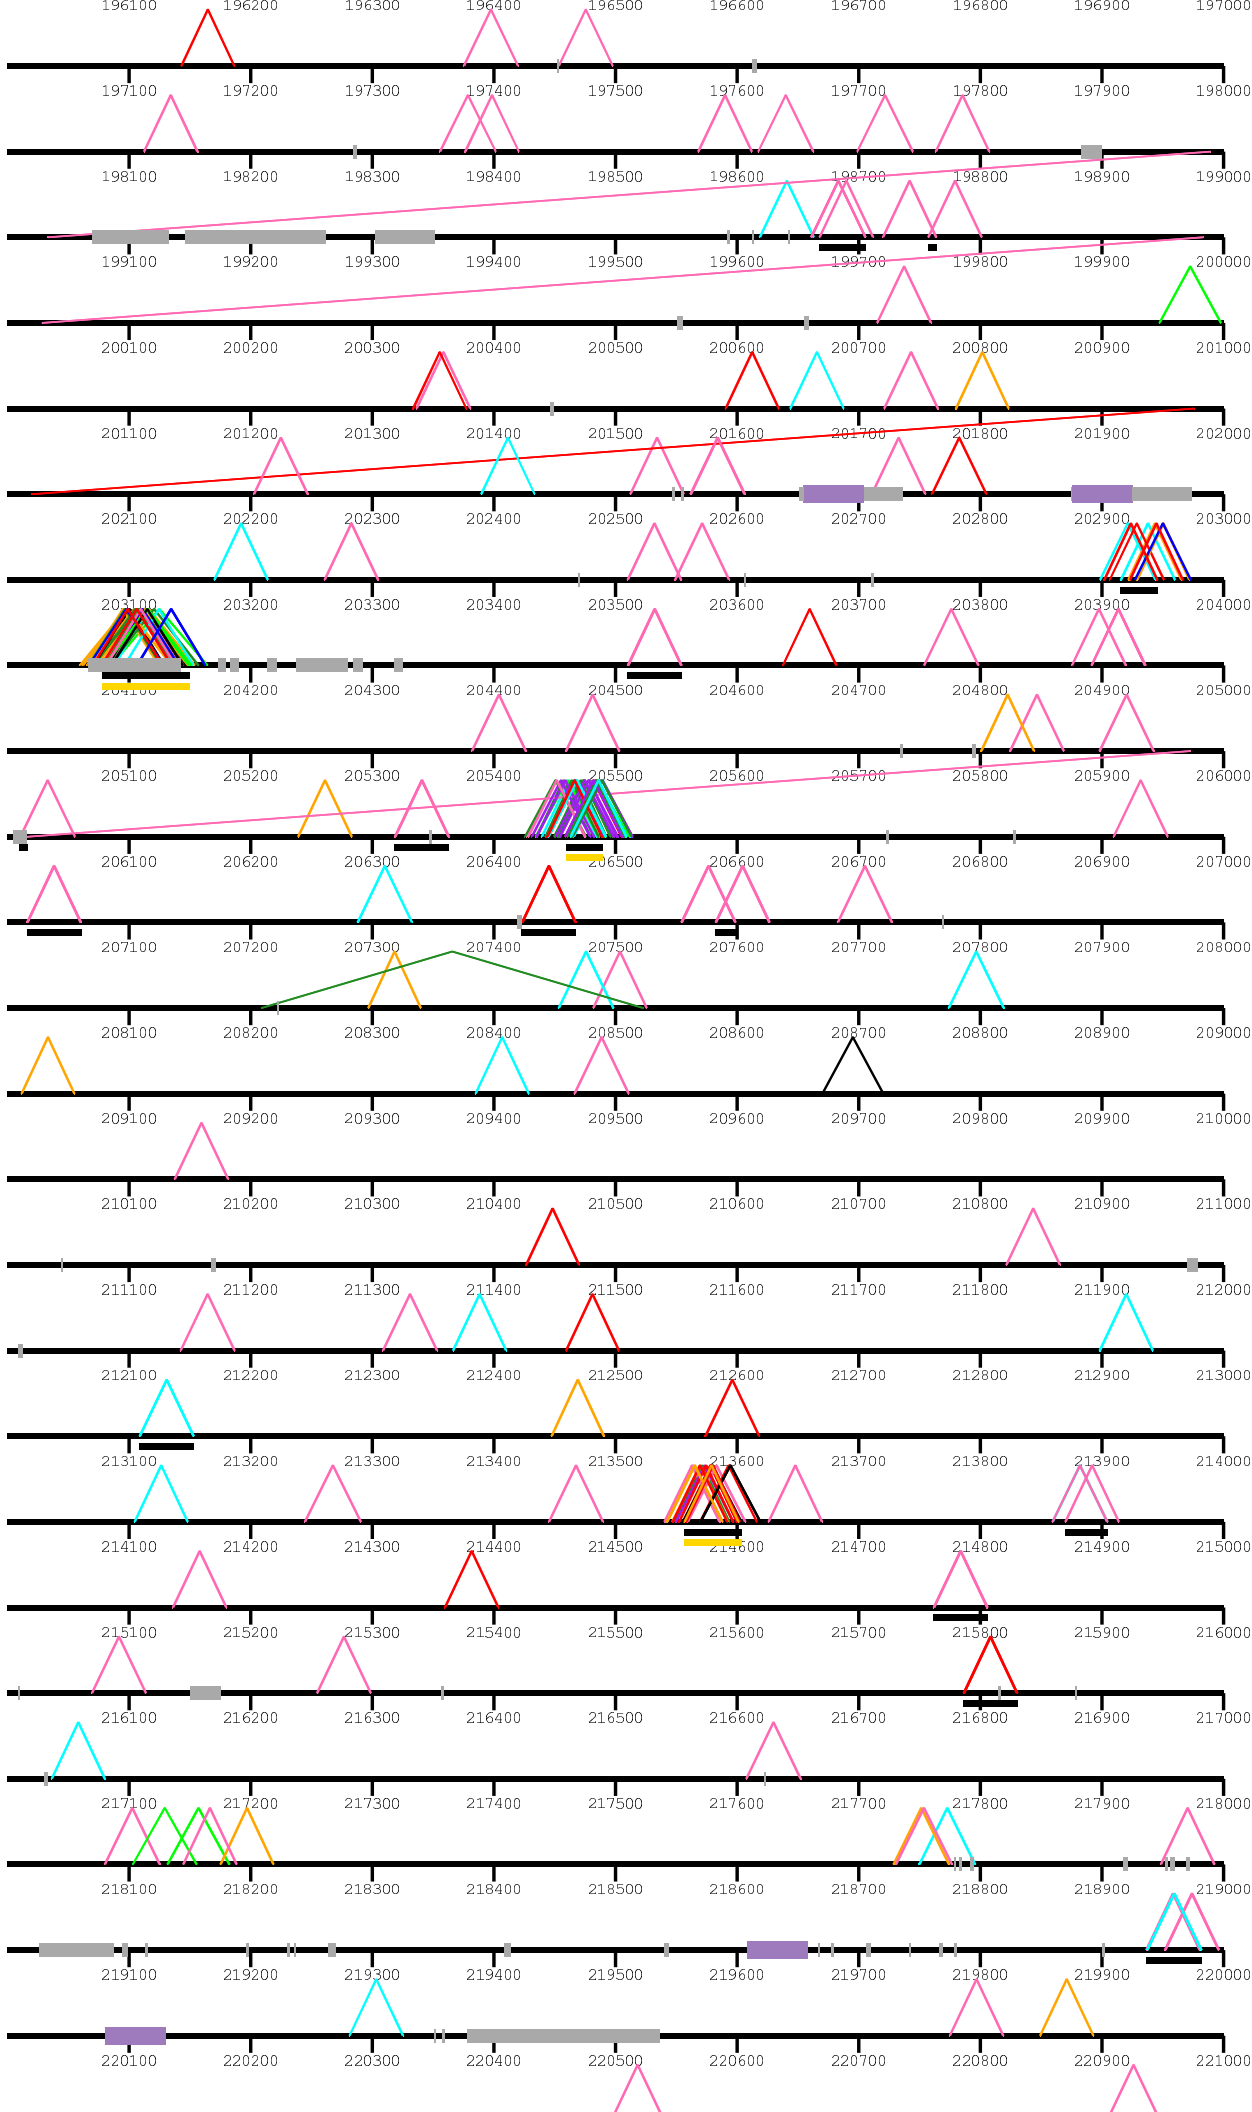

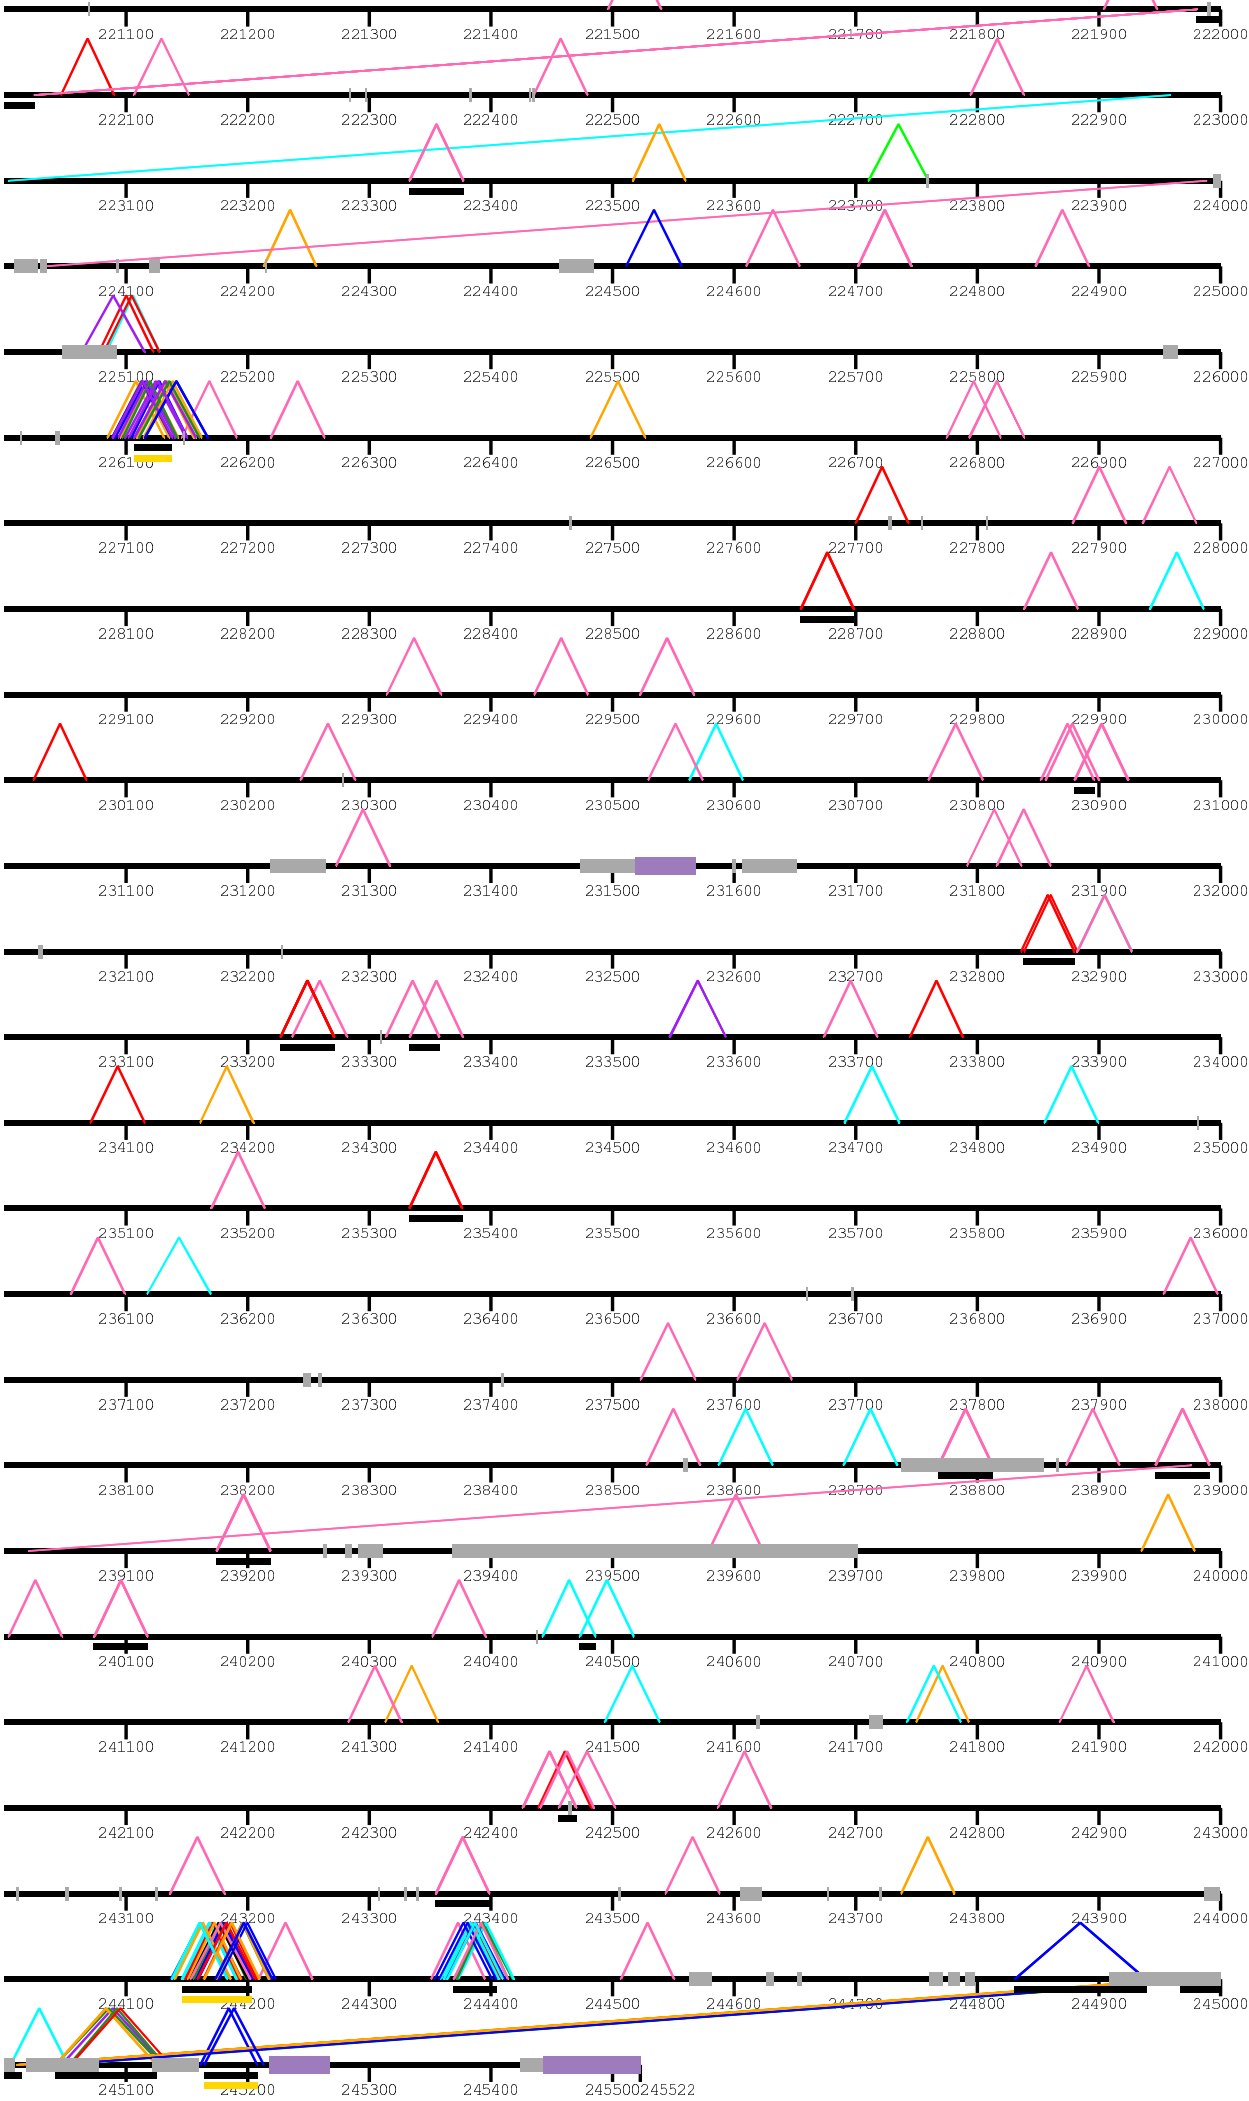

chr2

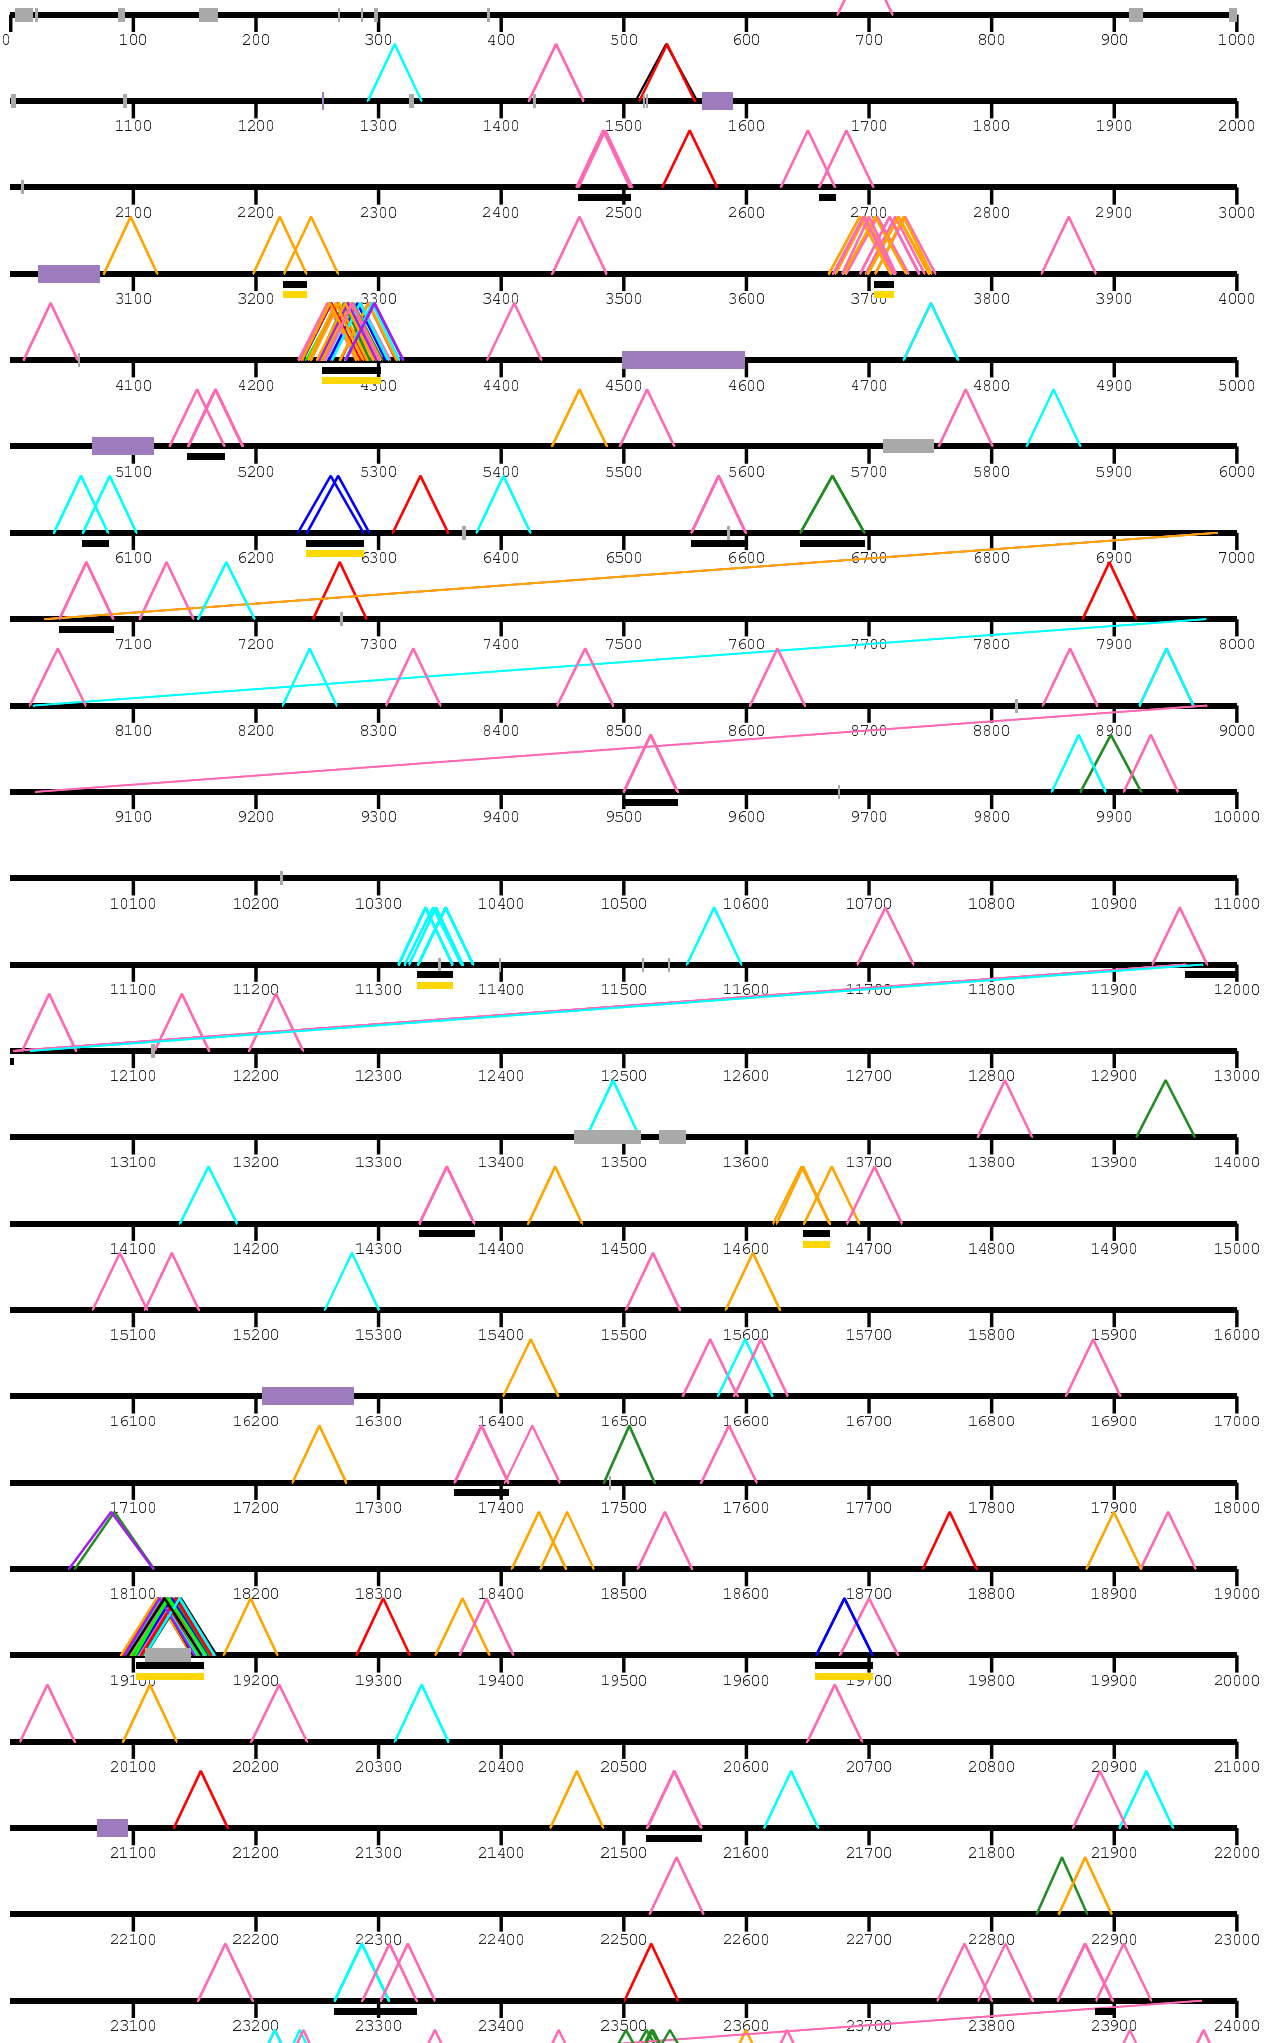

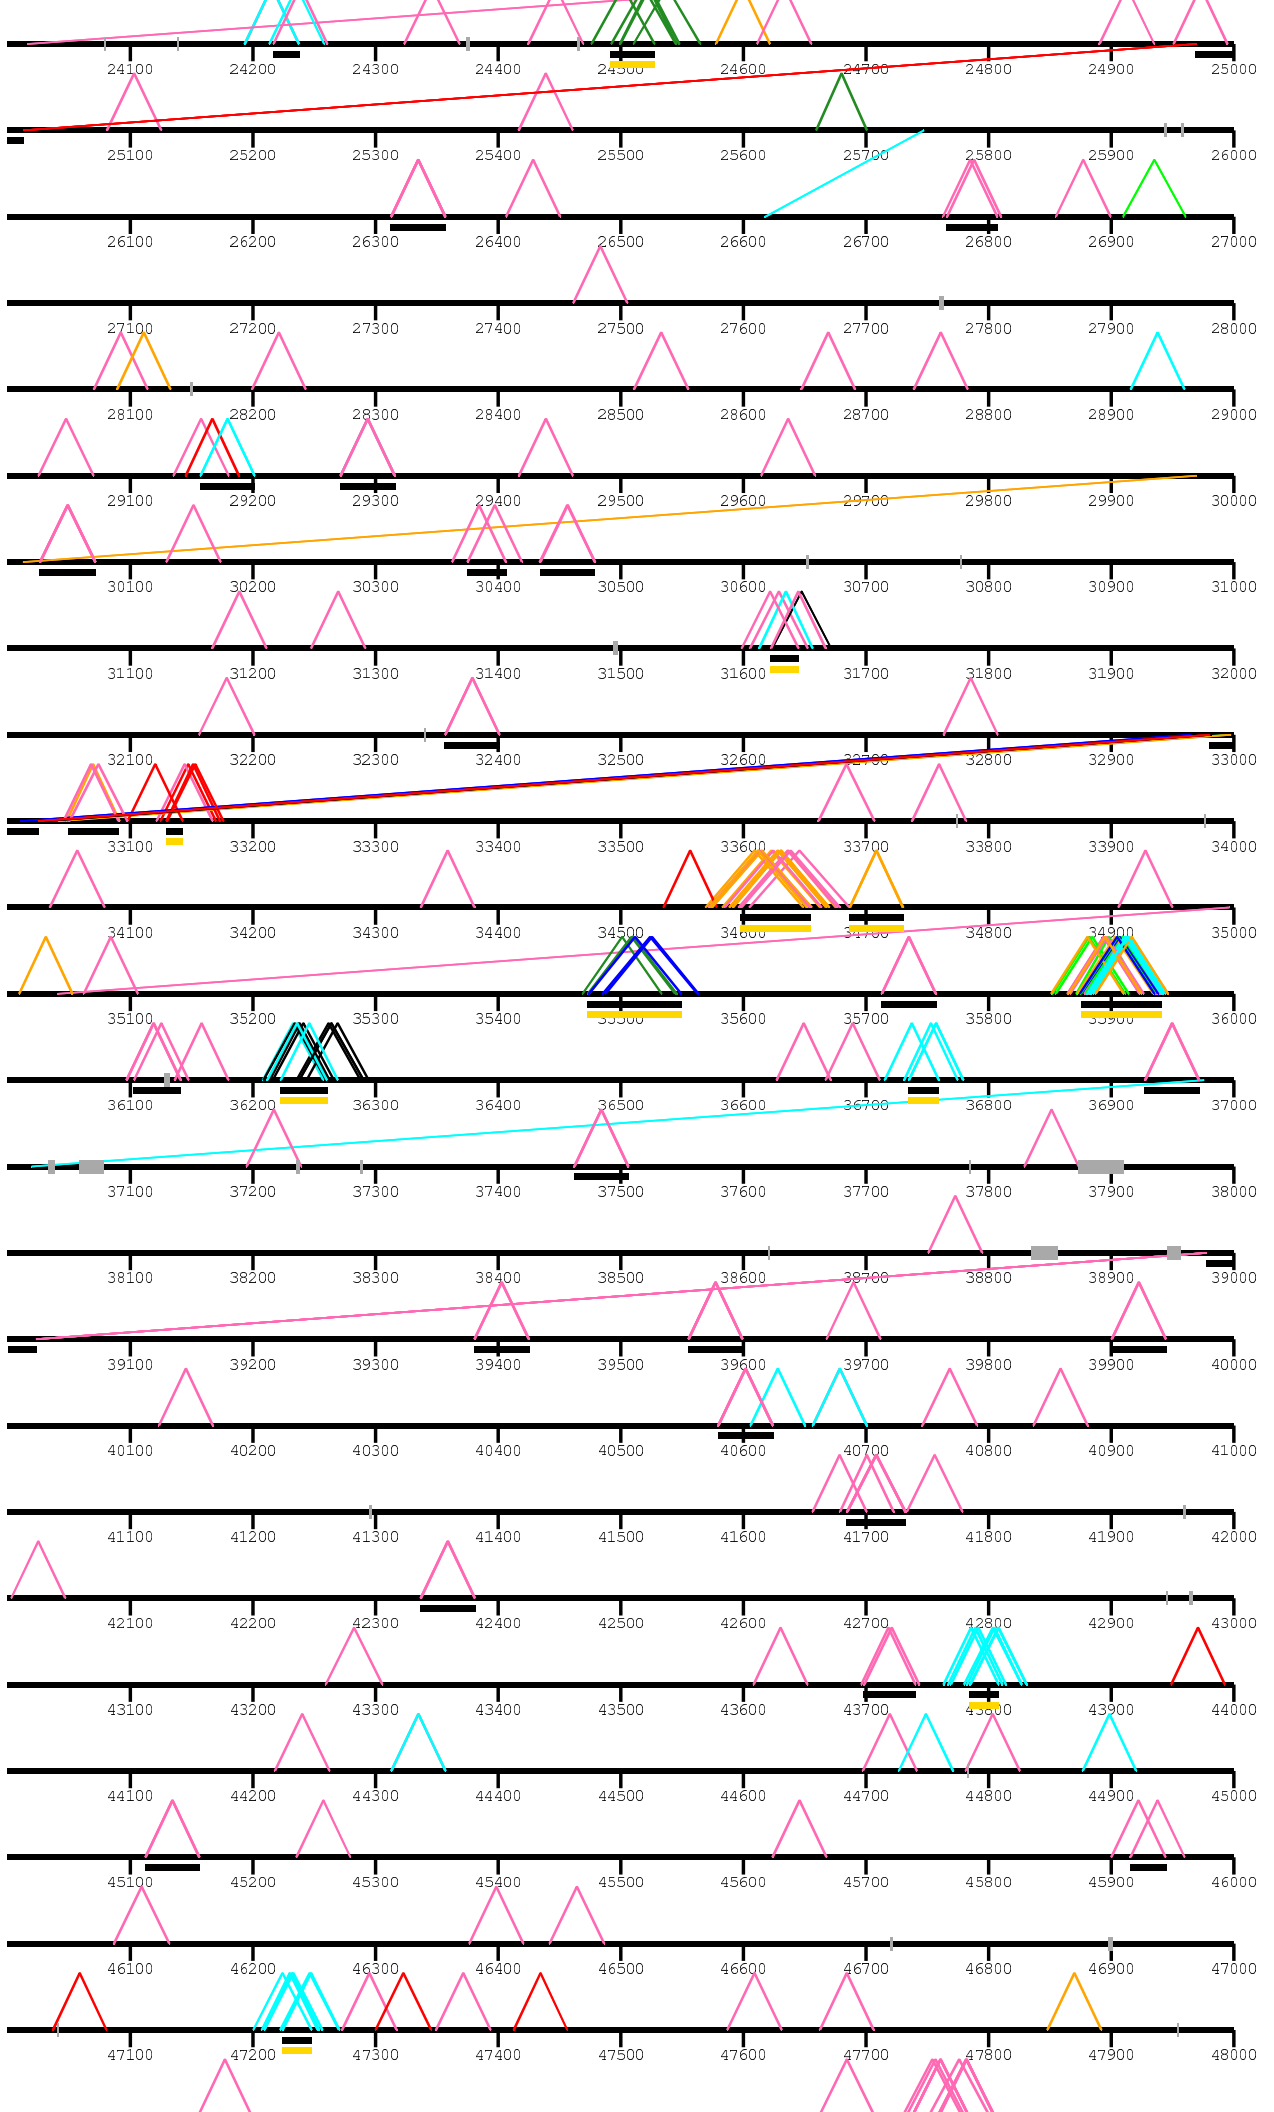

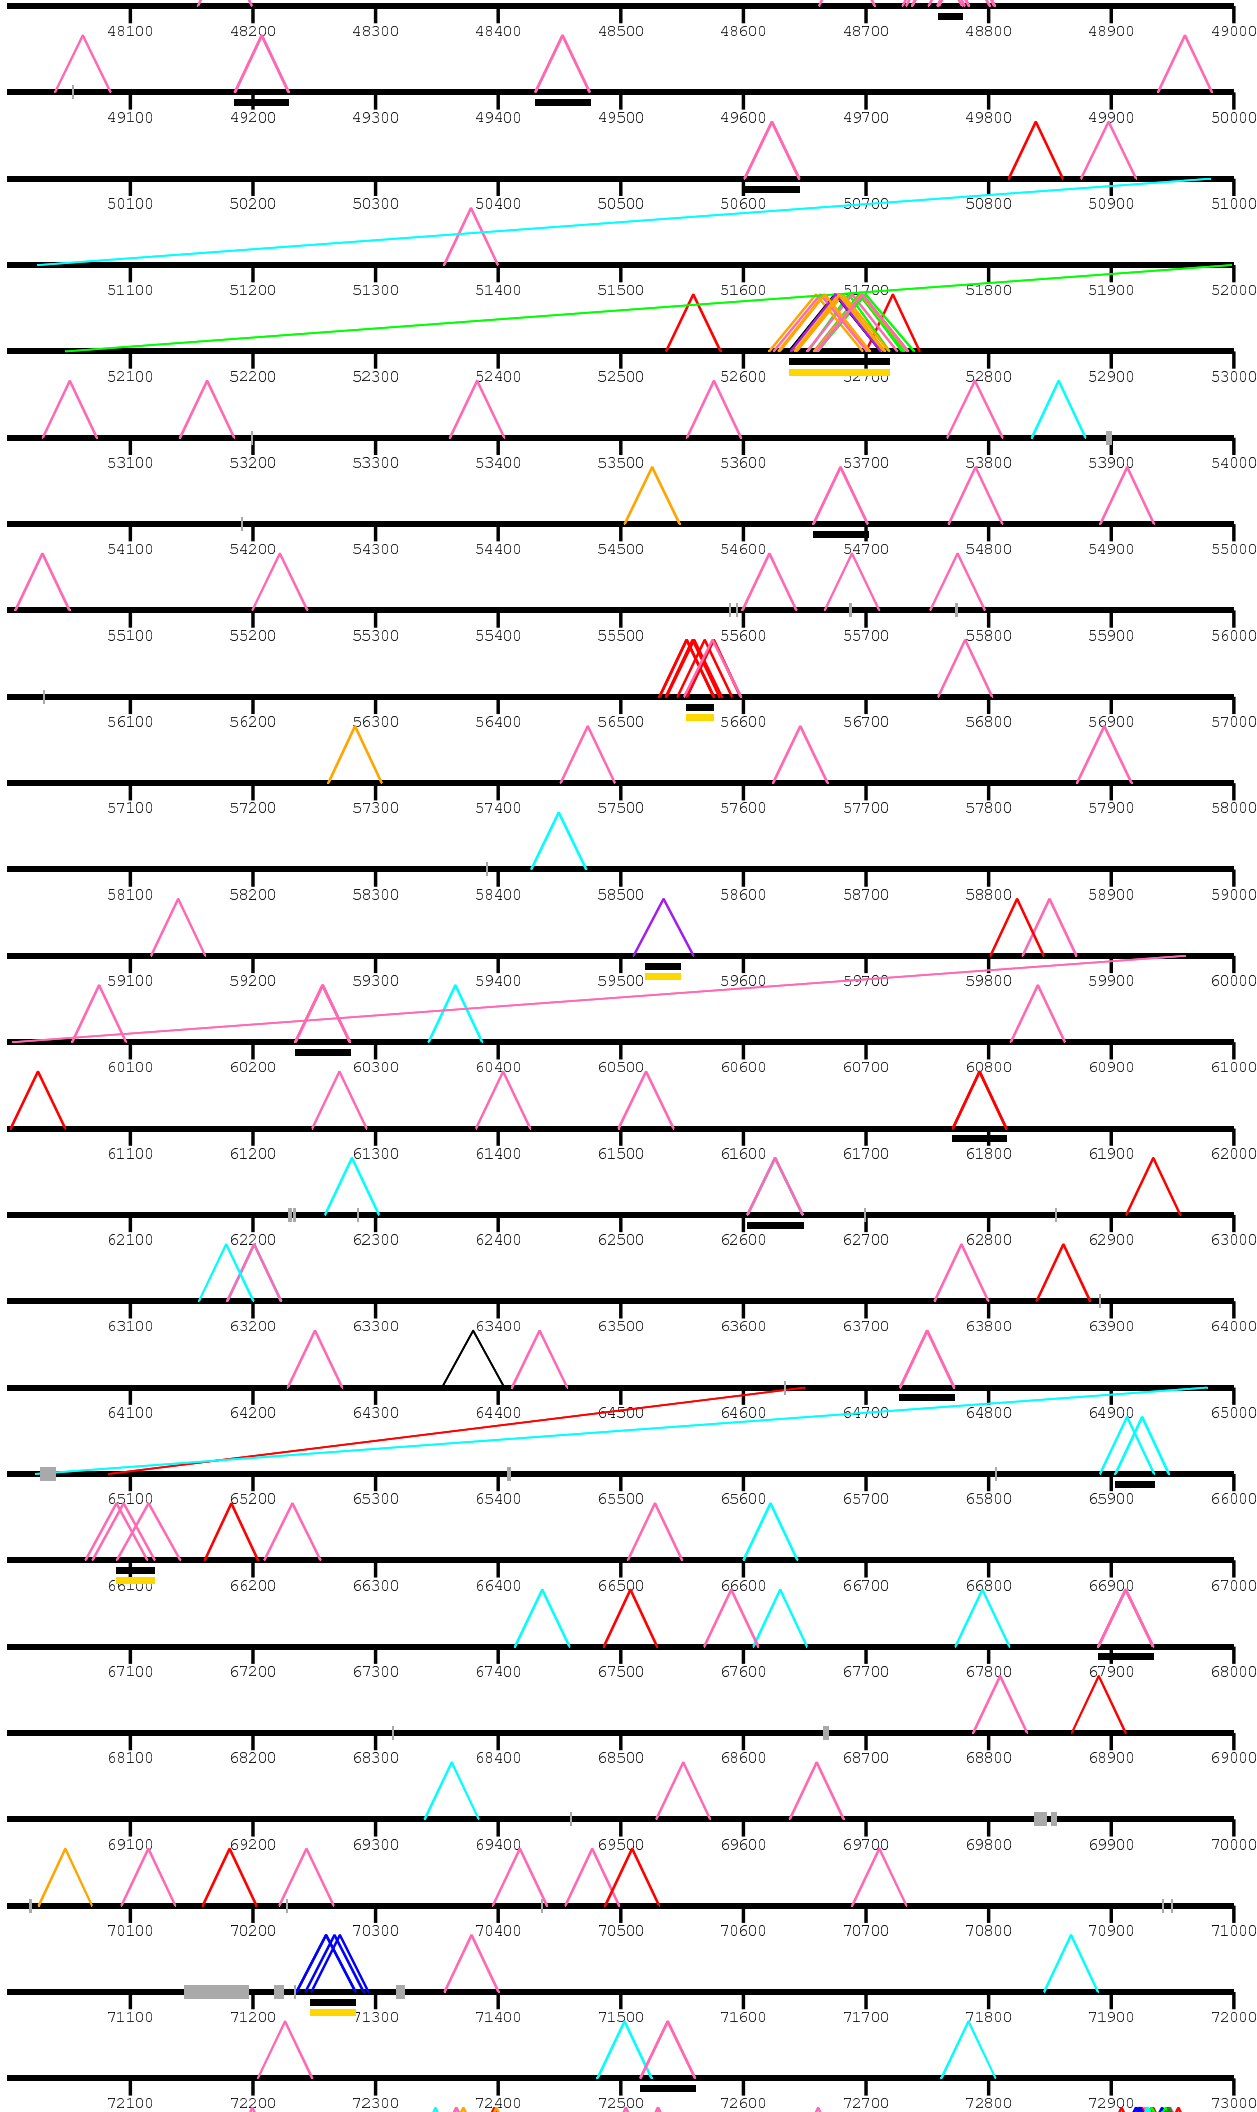

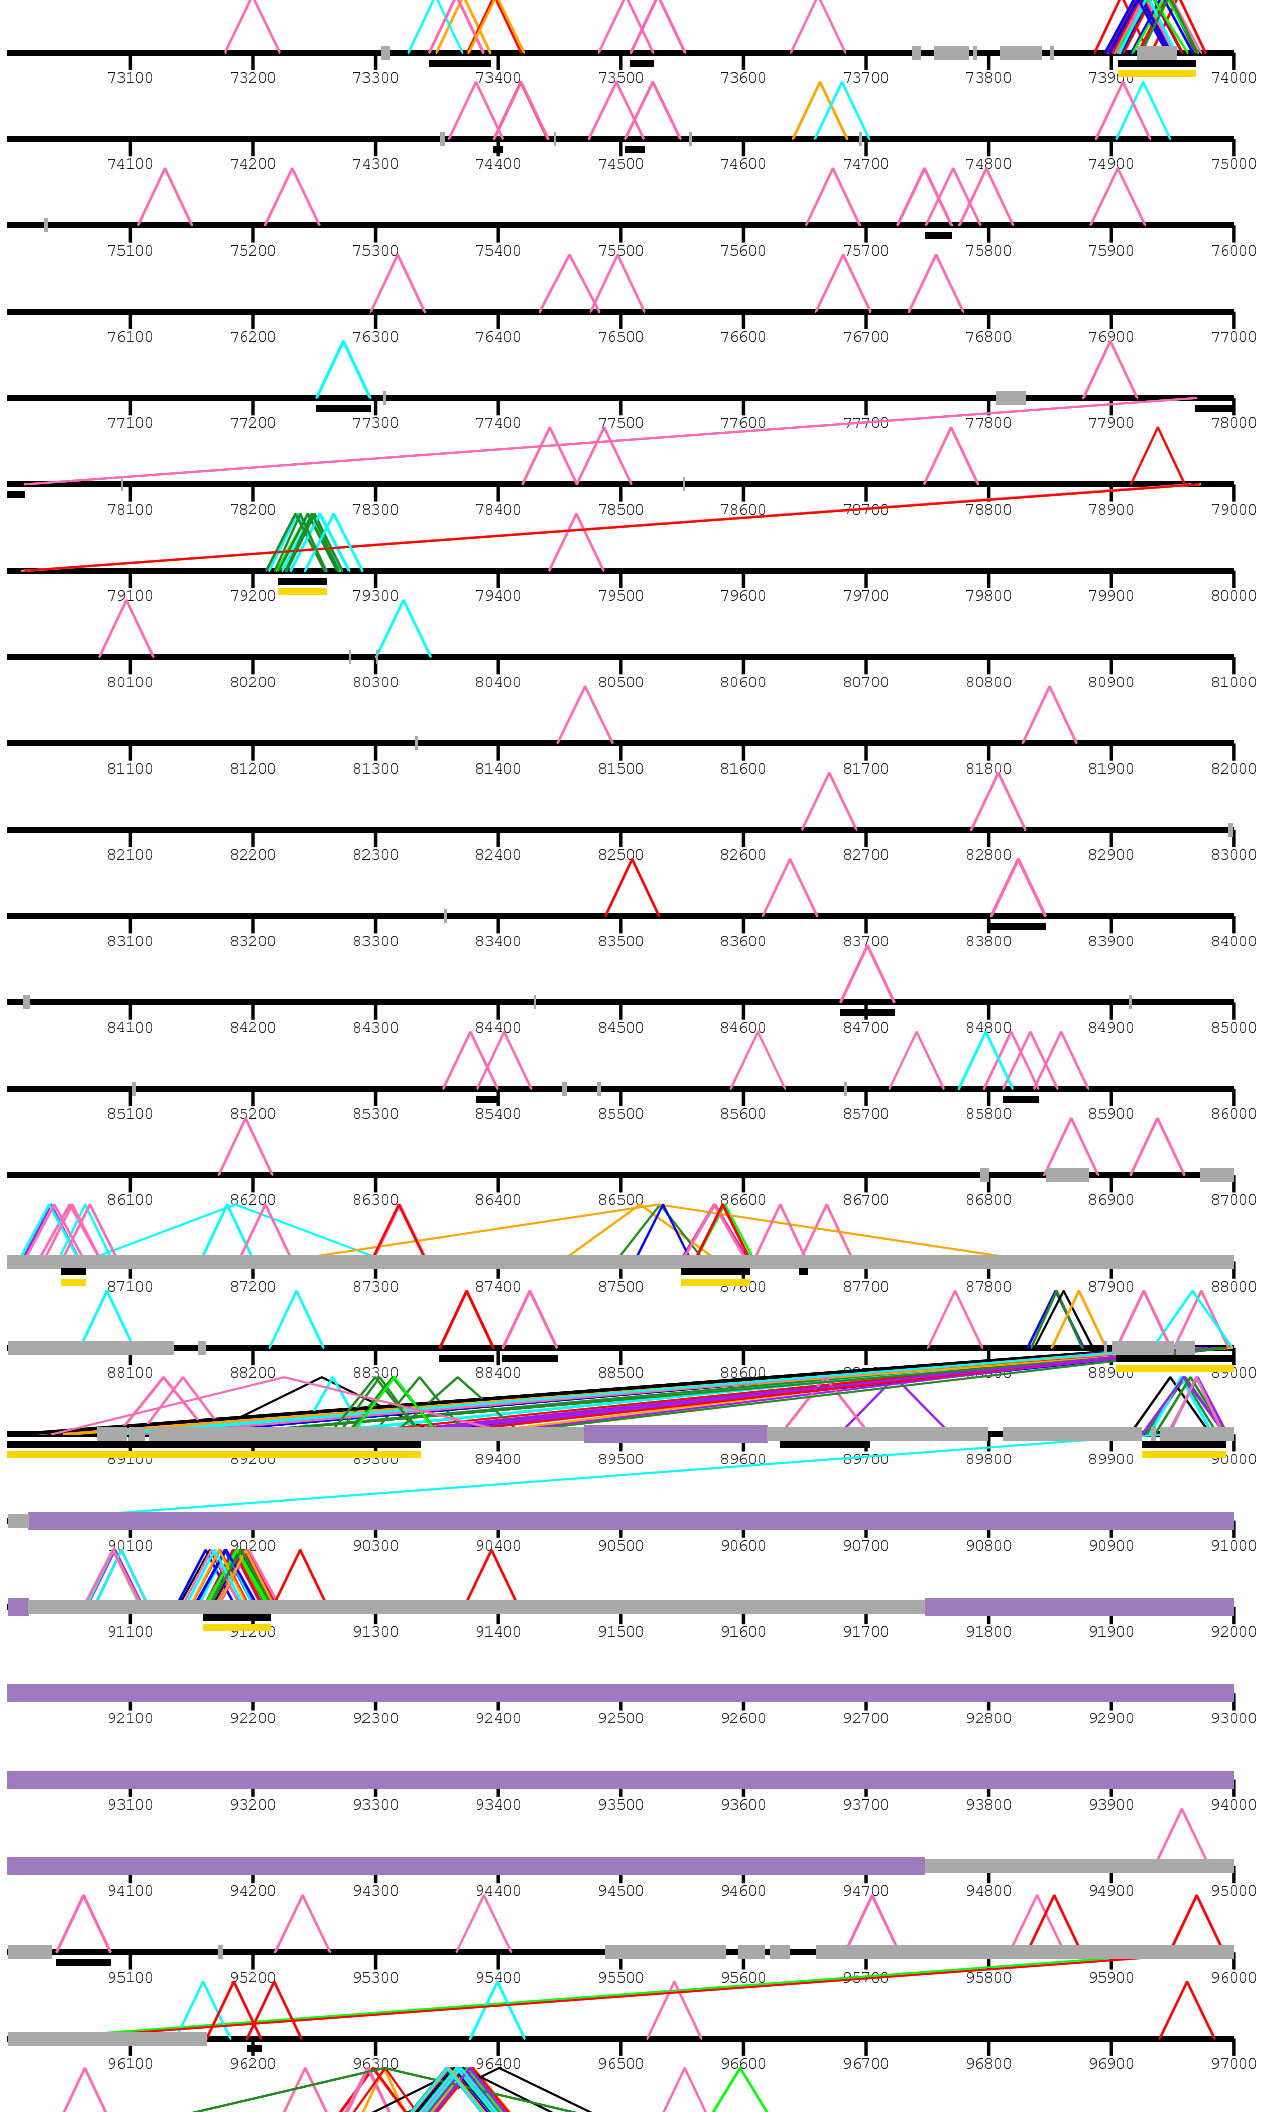

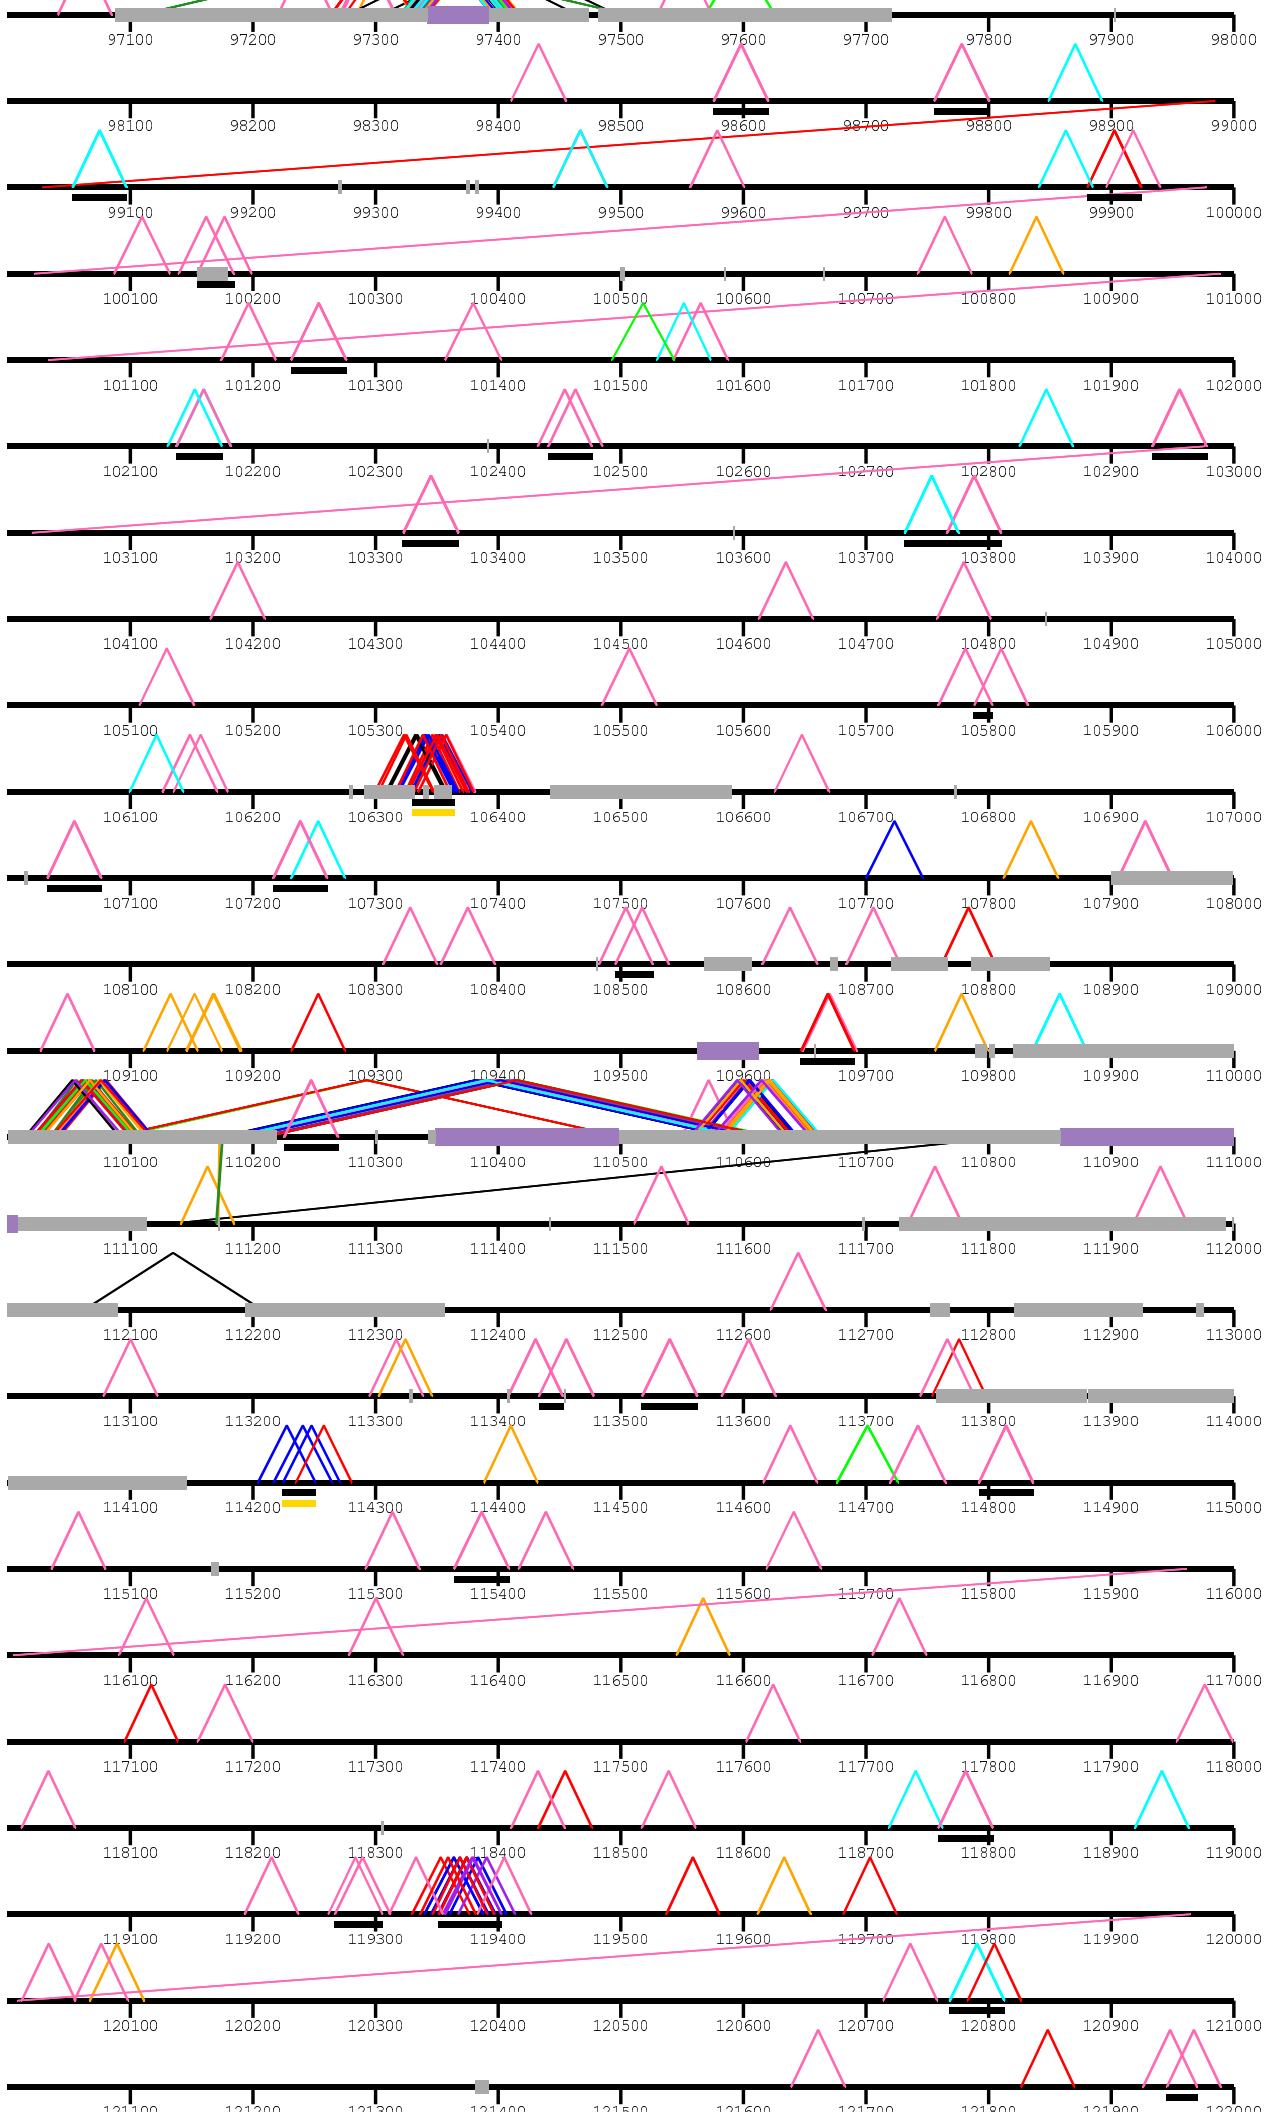



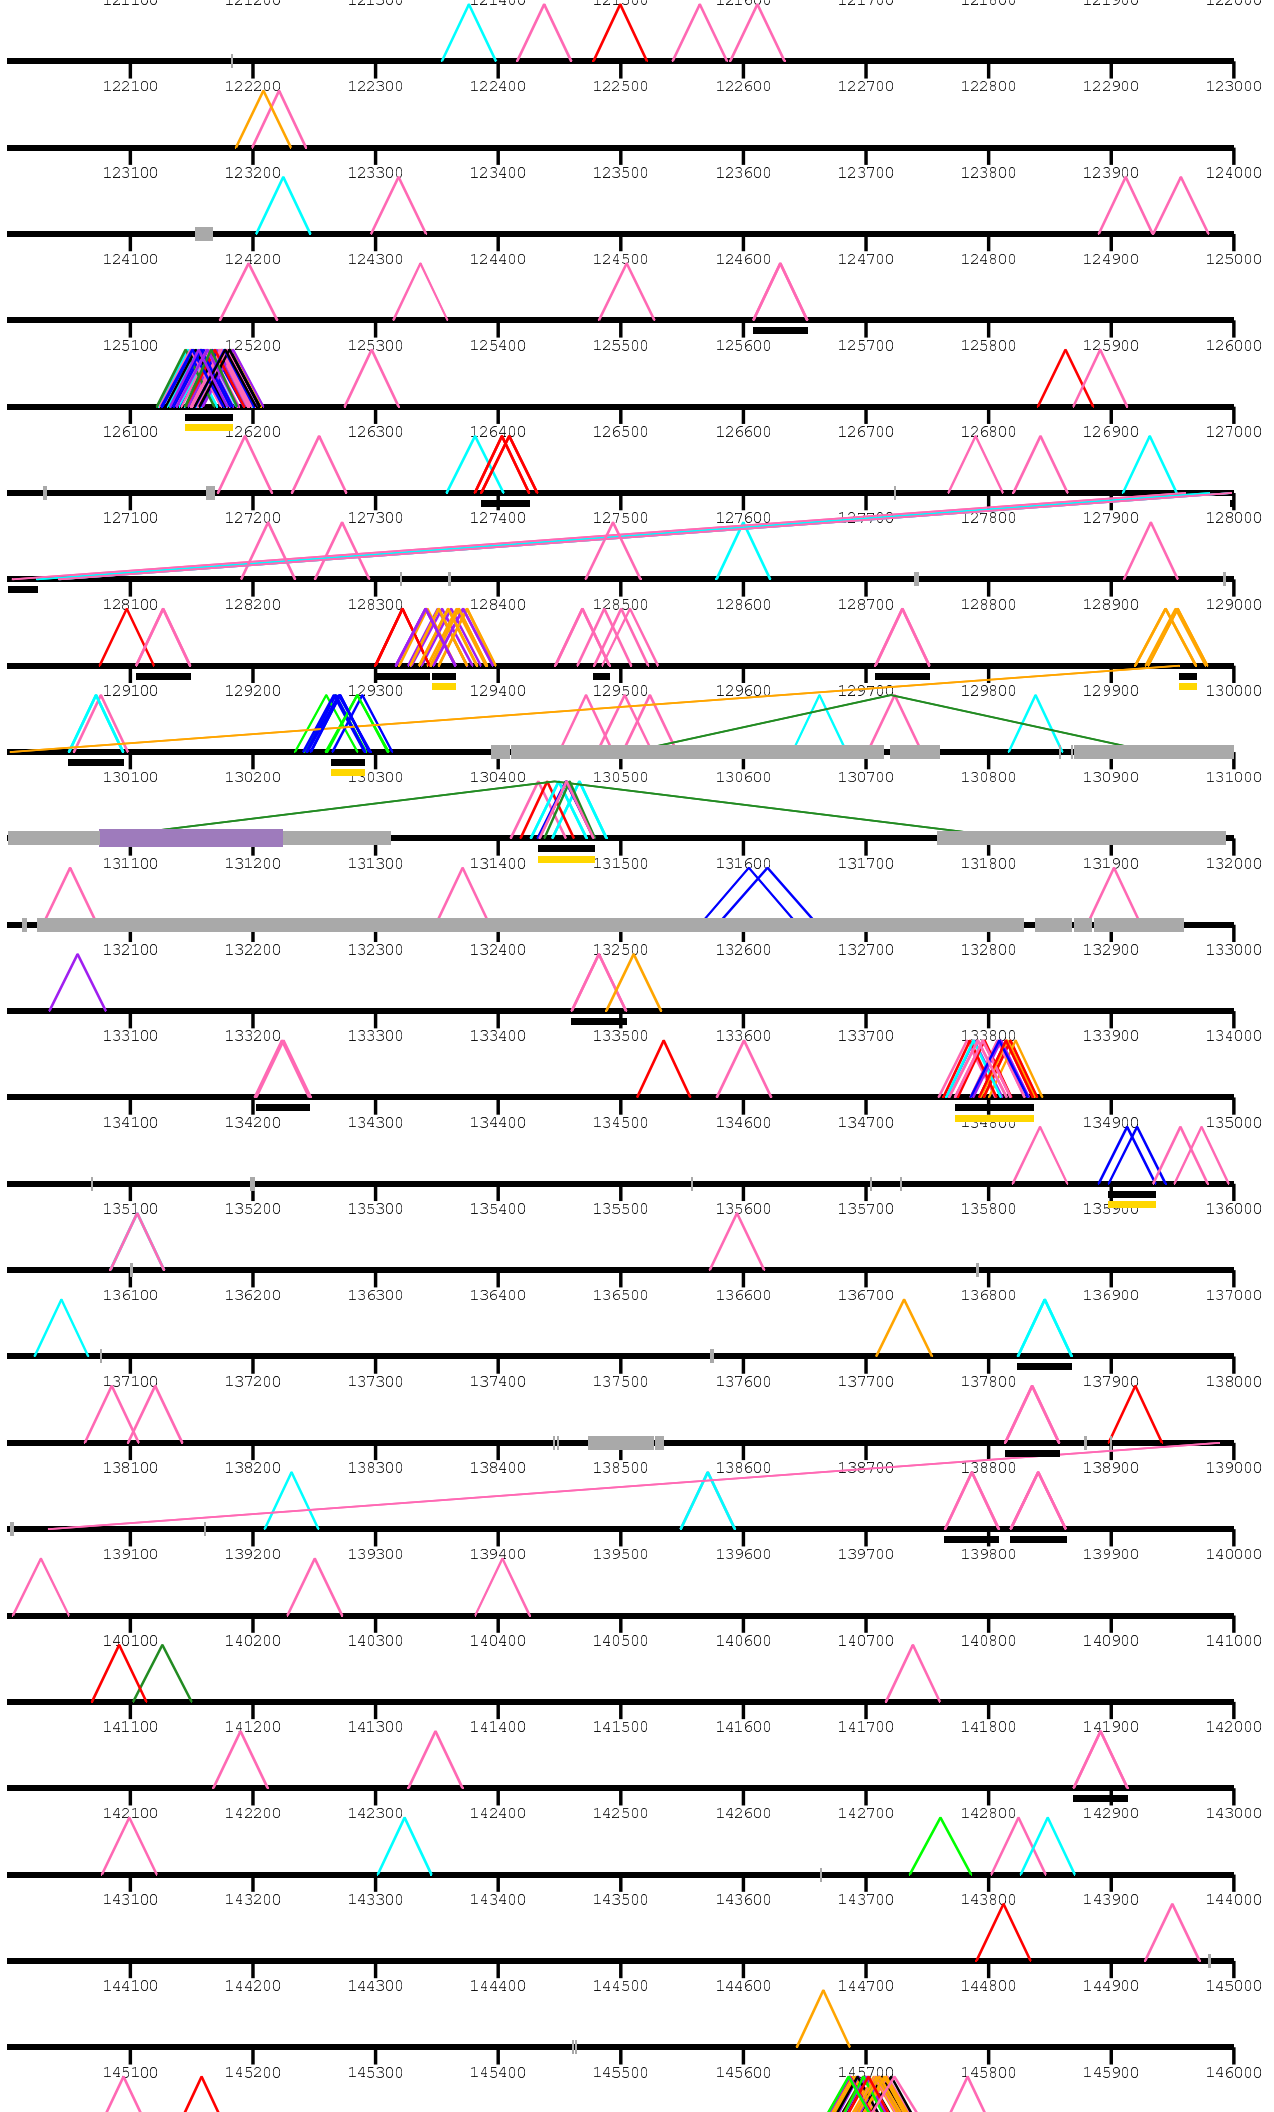

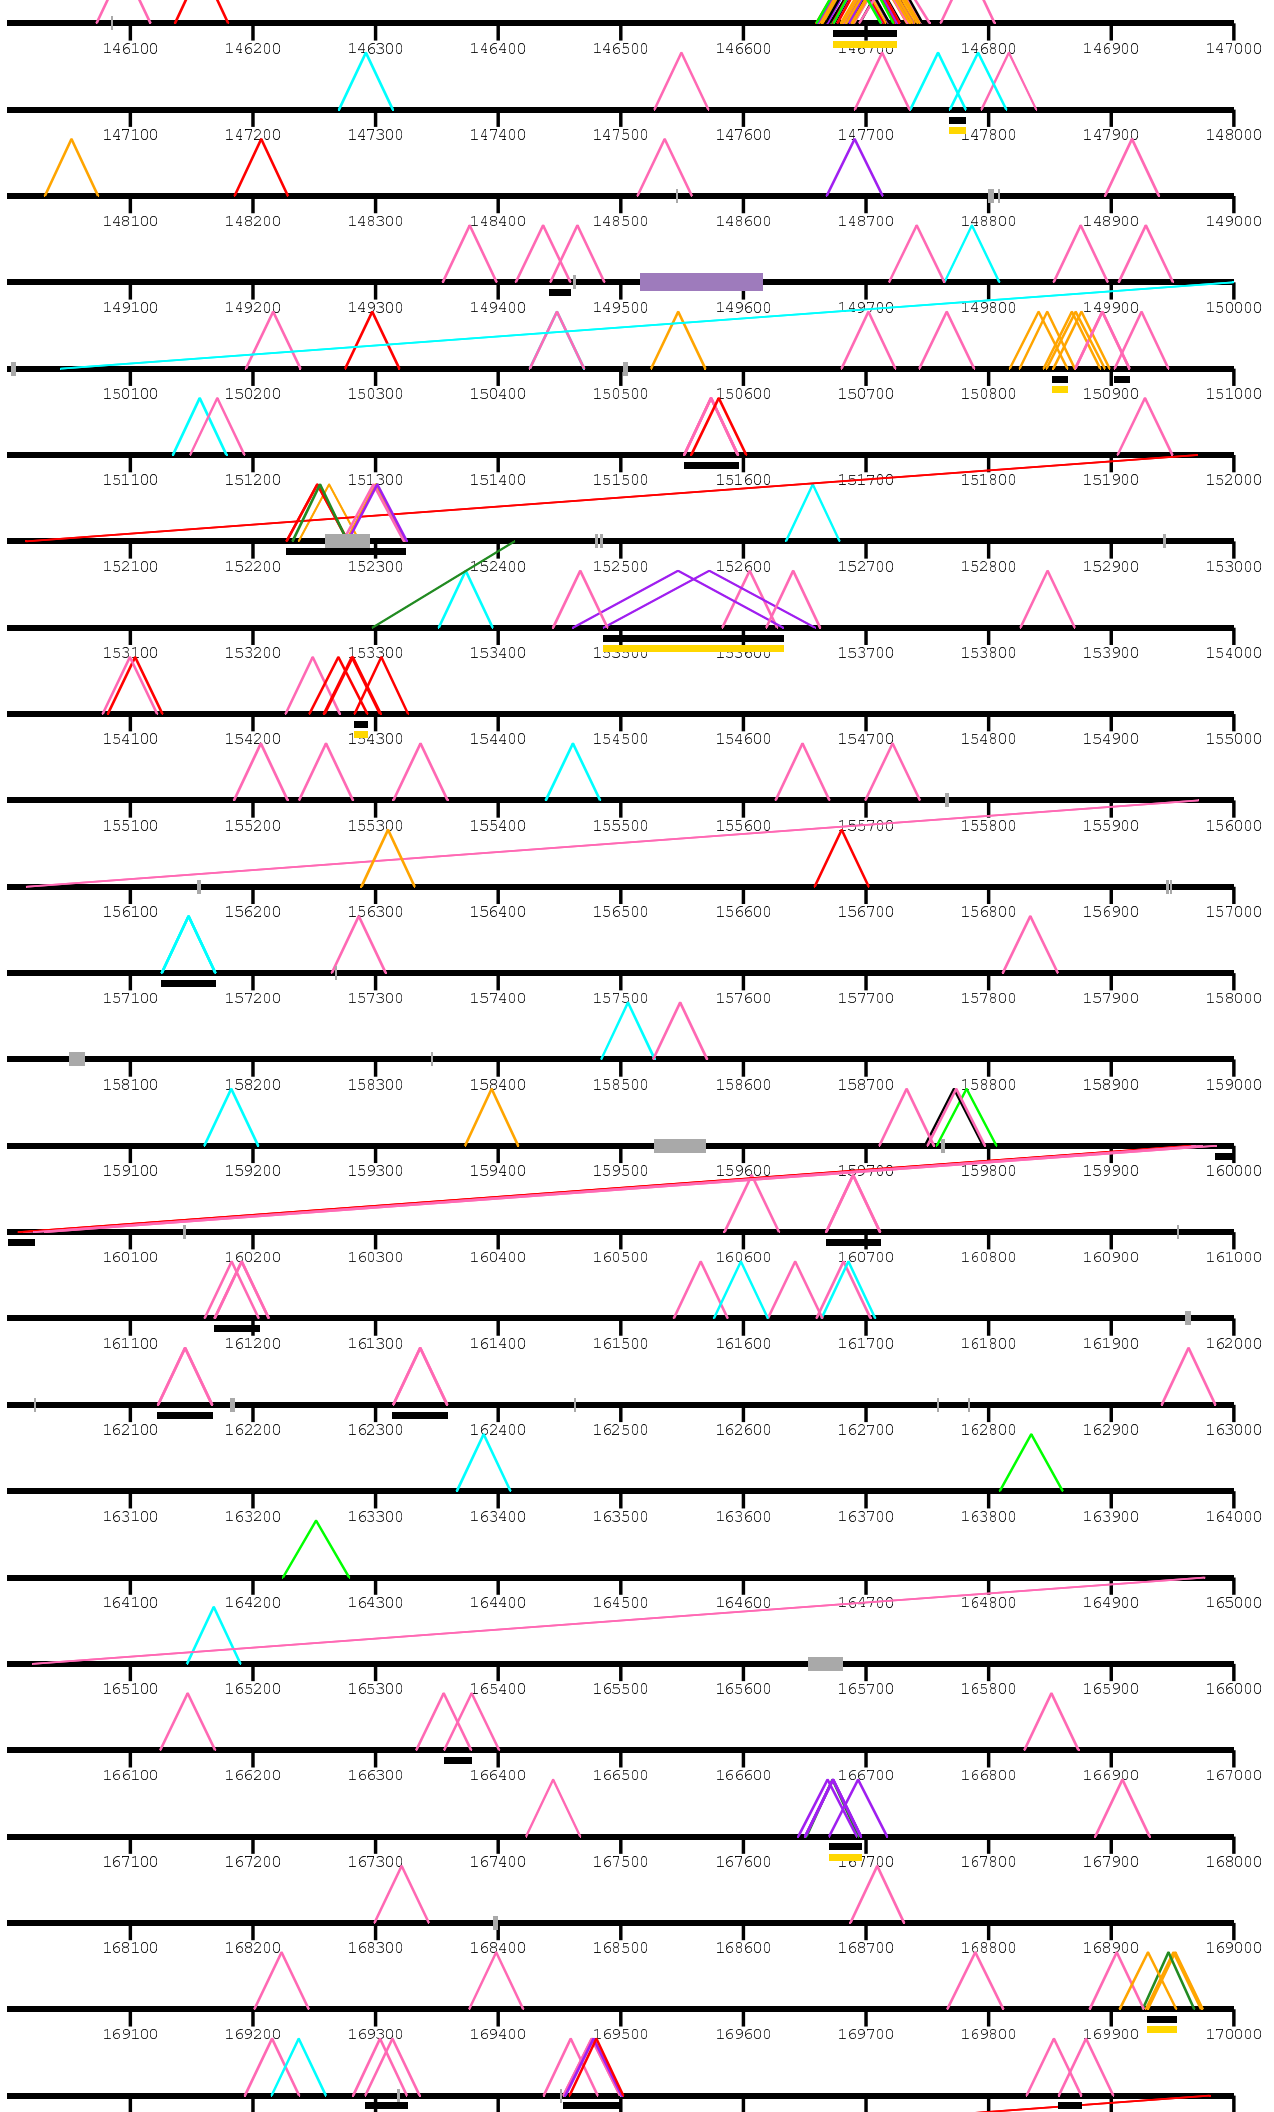

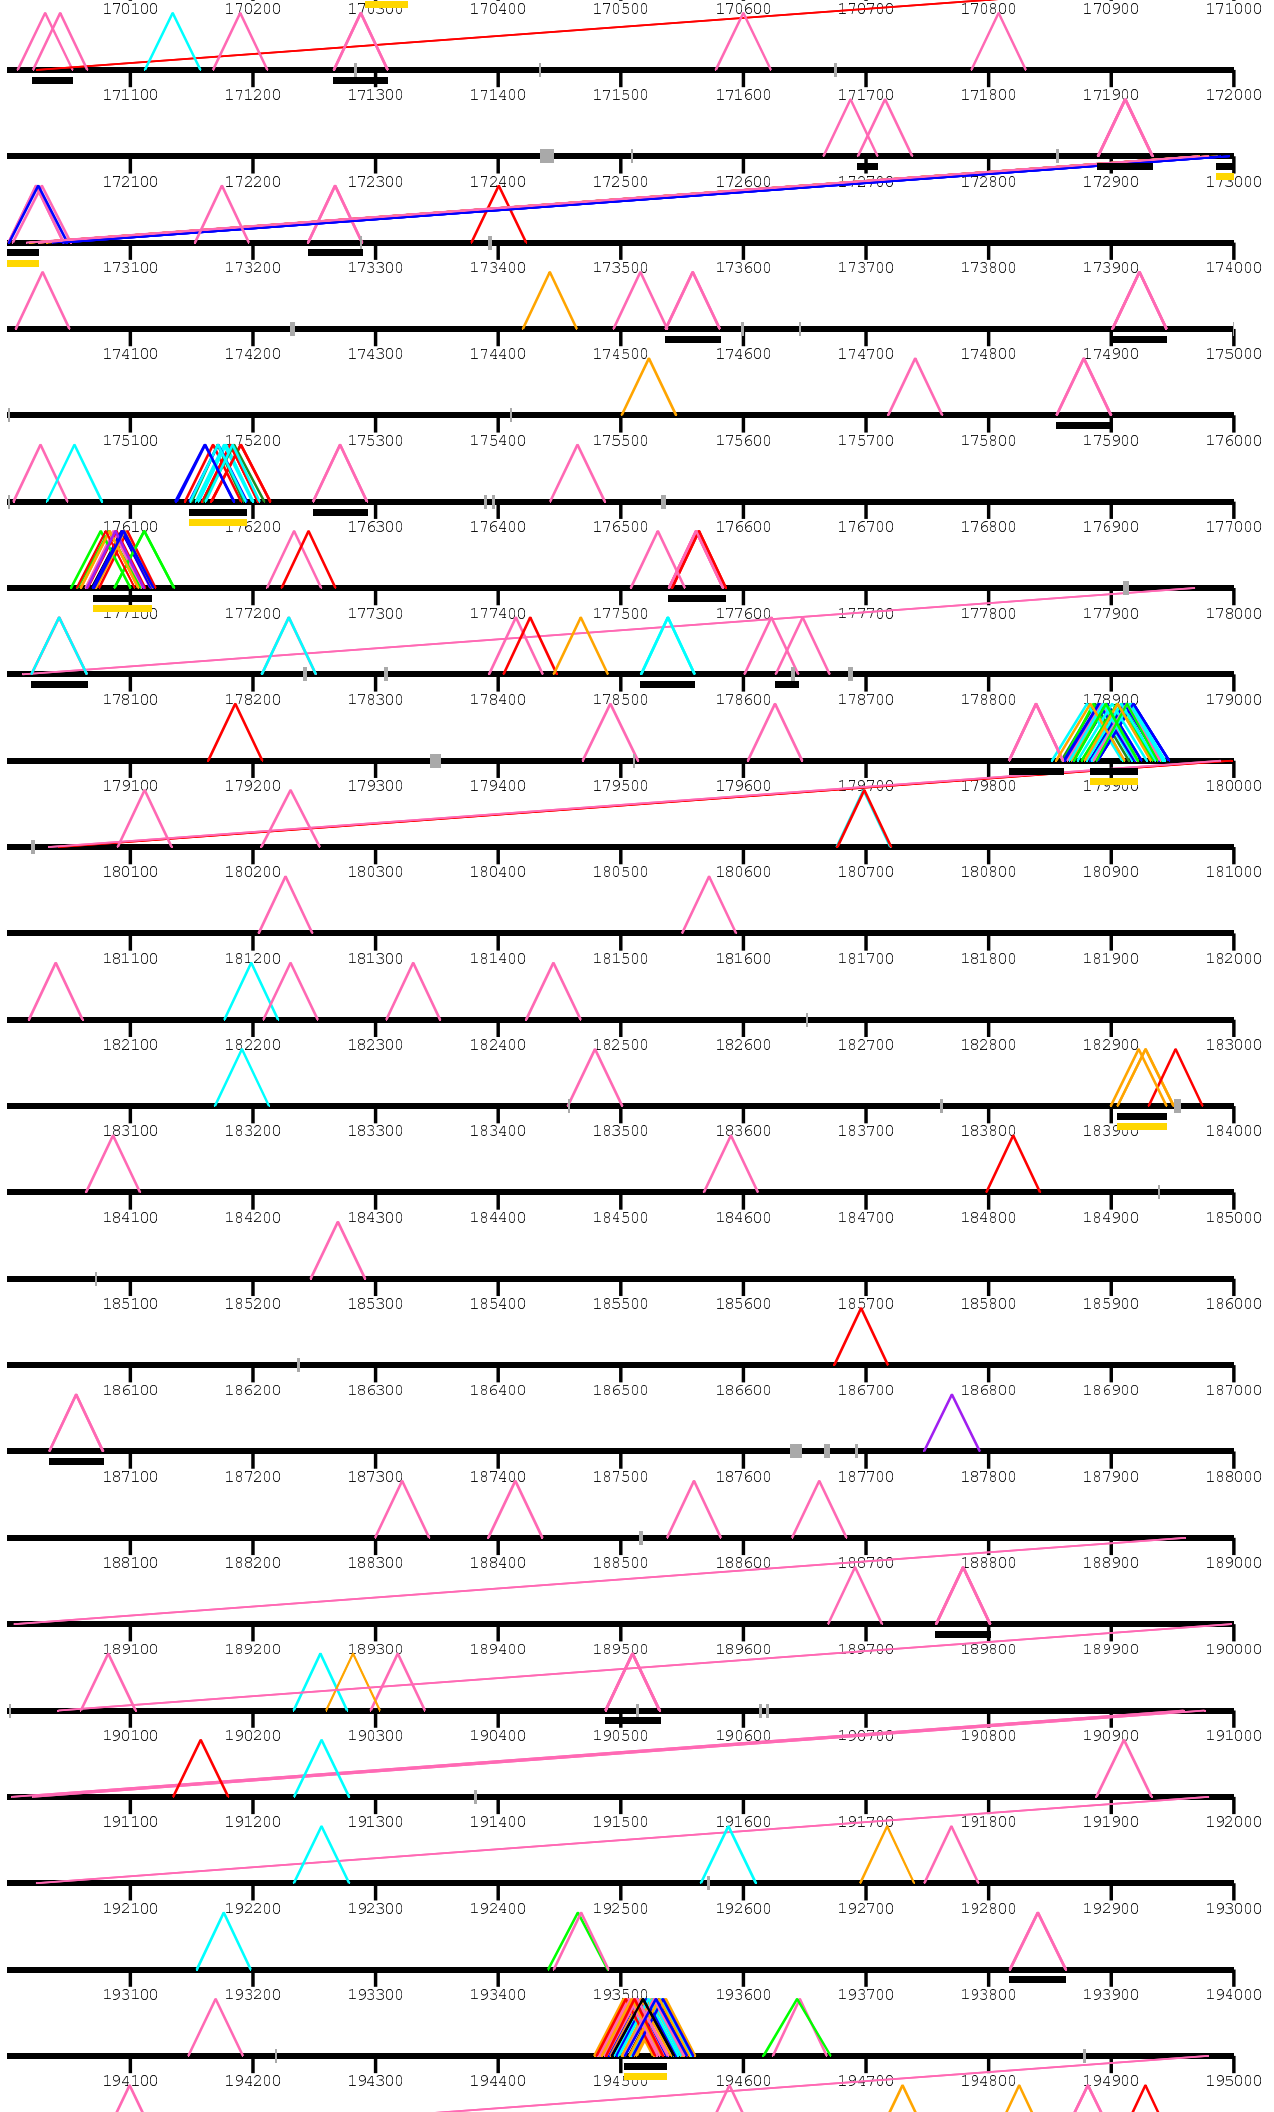

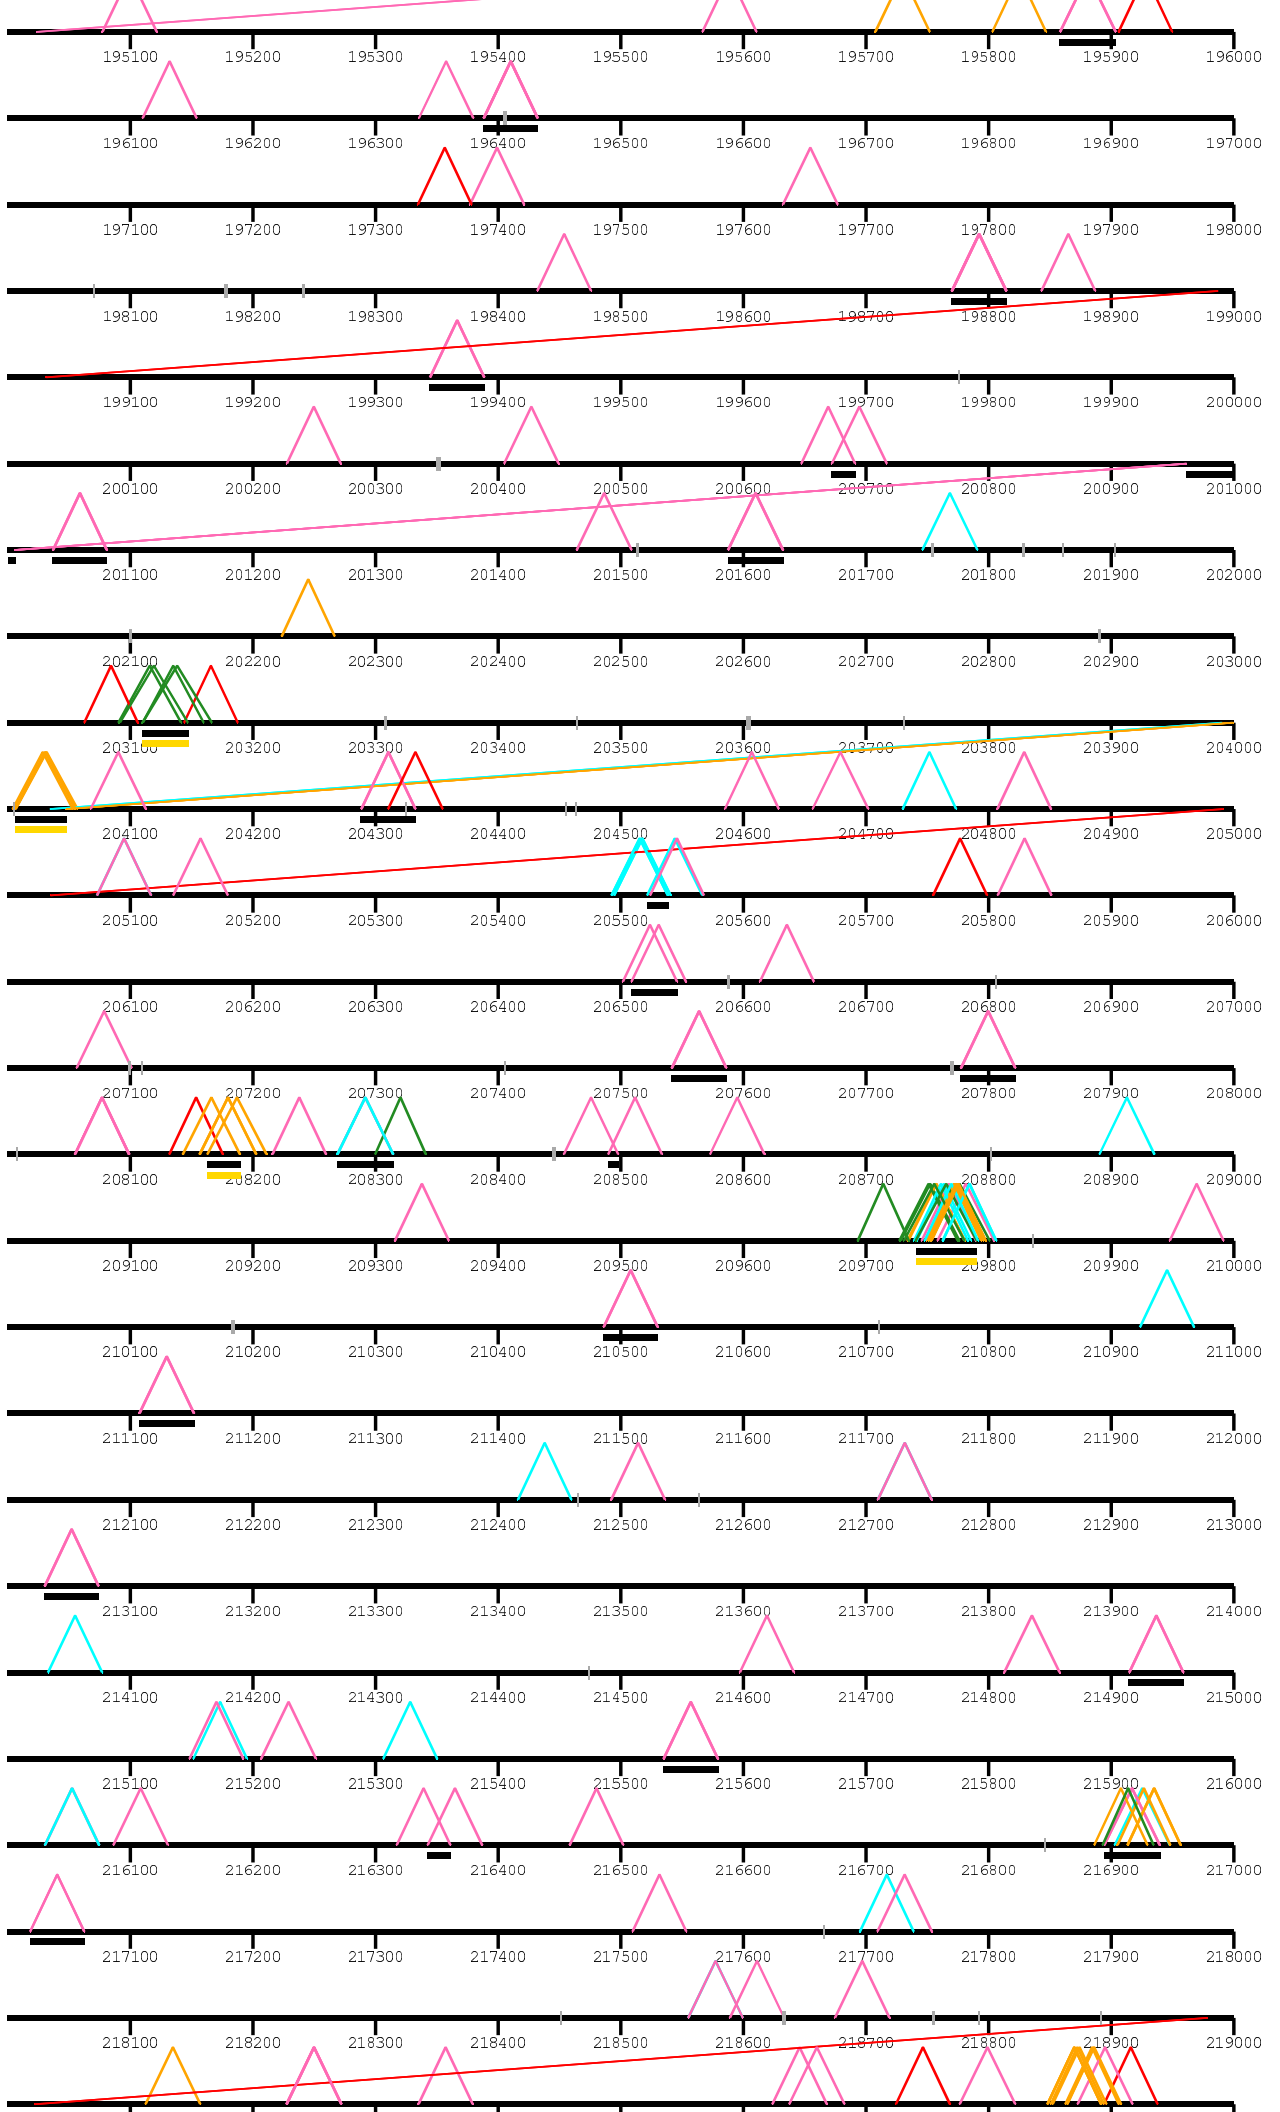

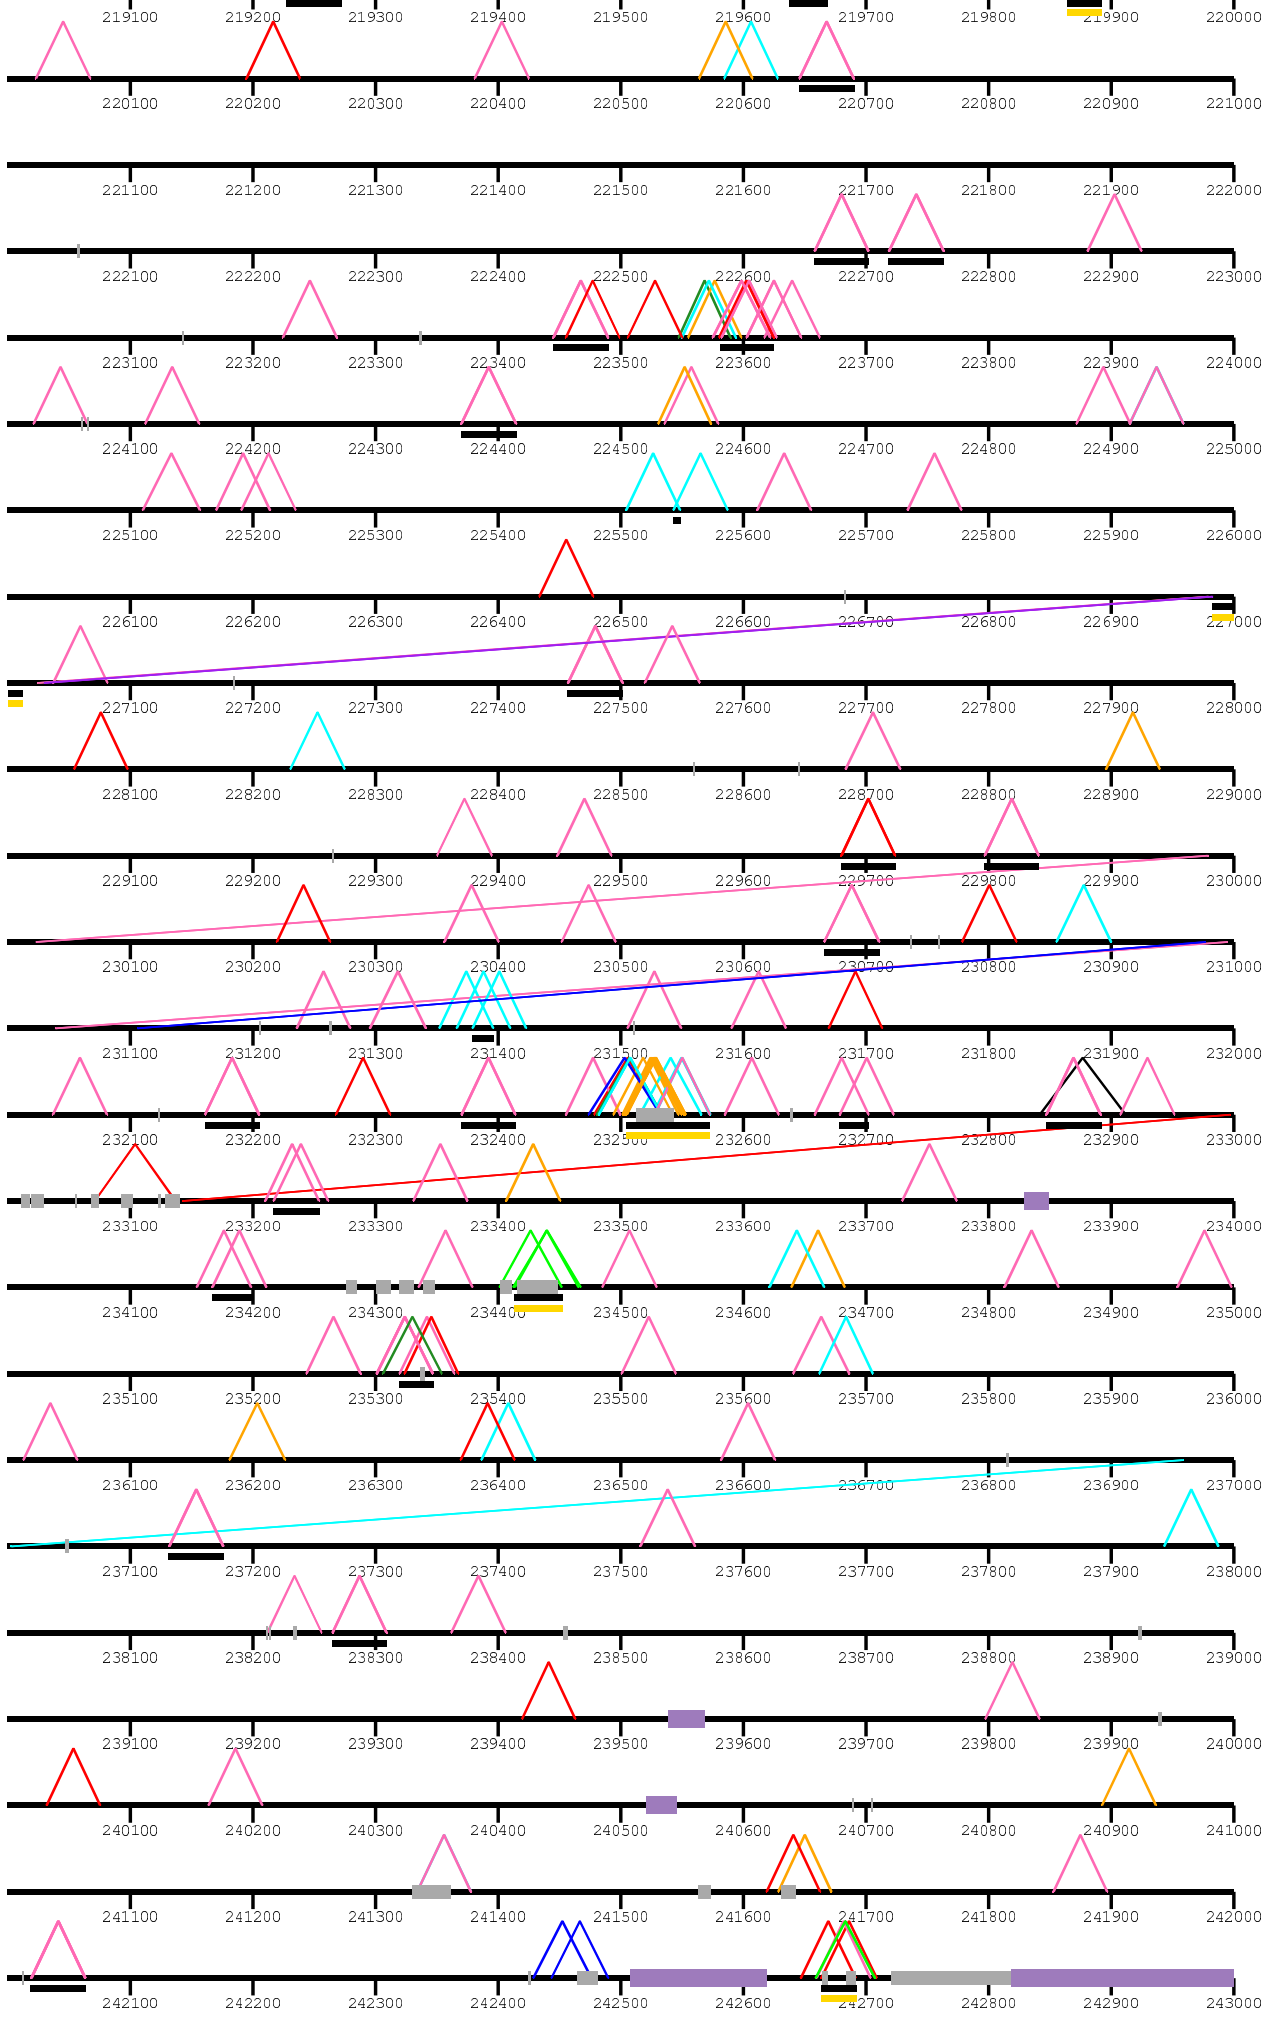

chr3

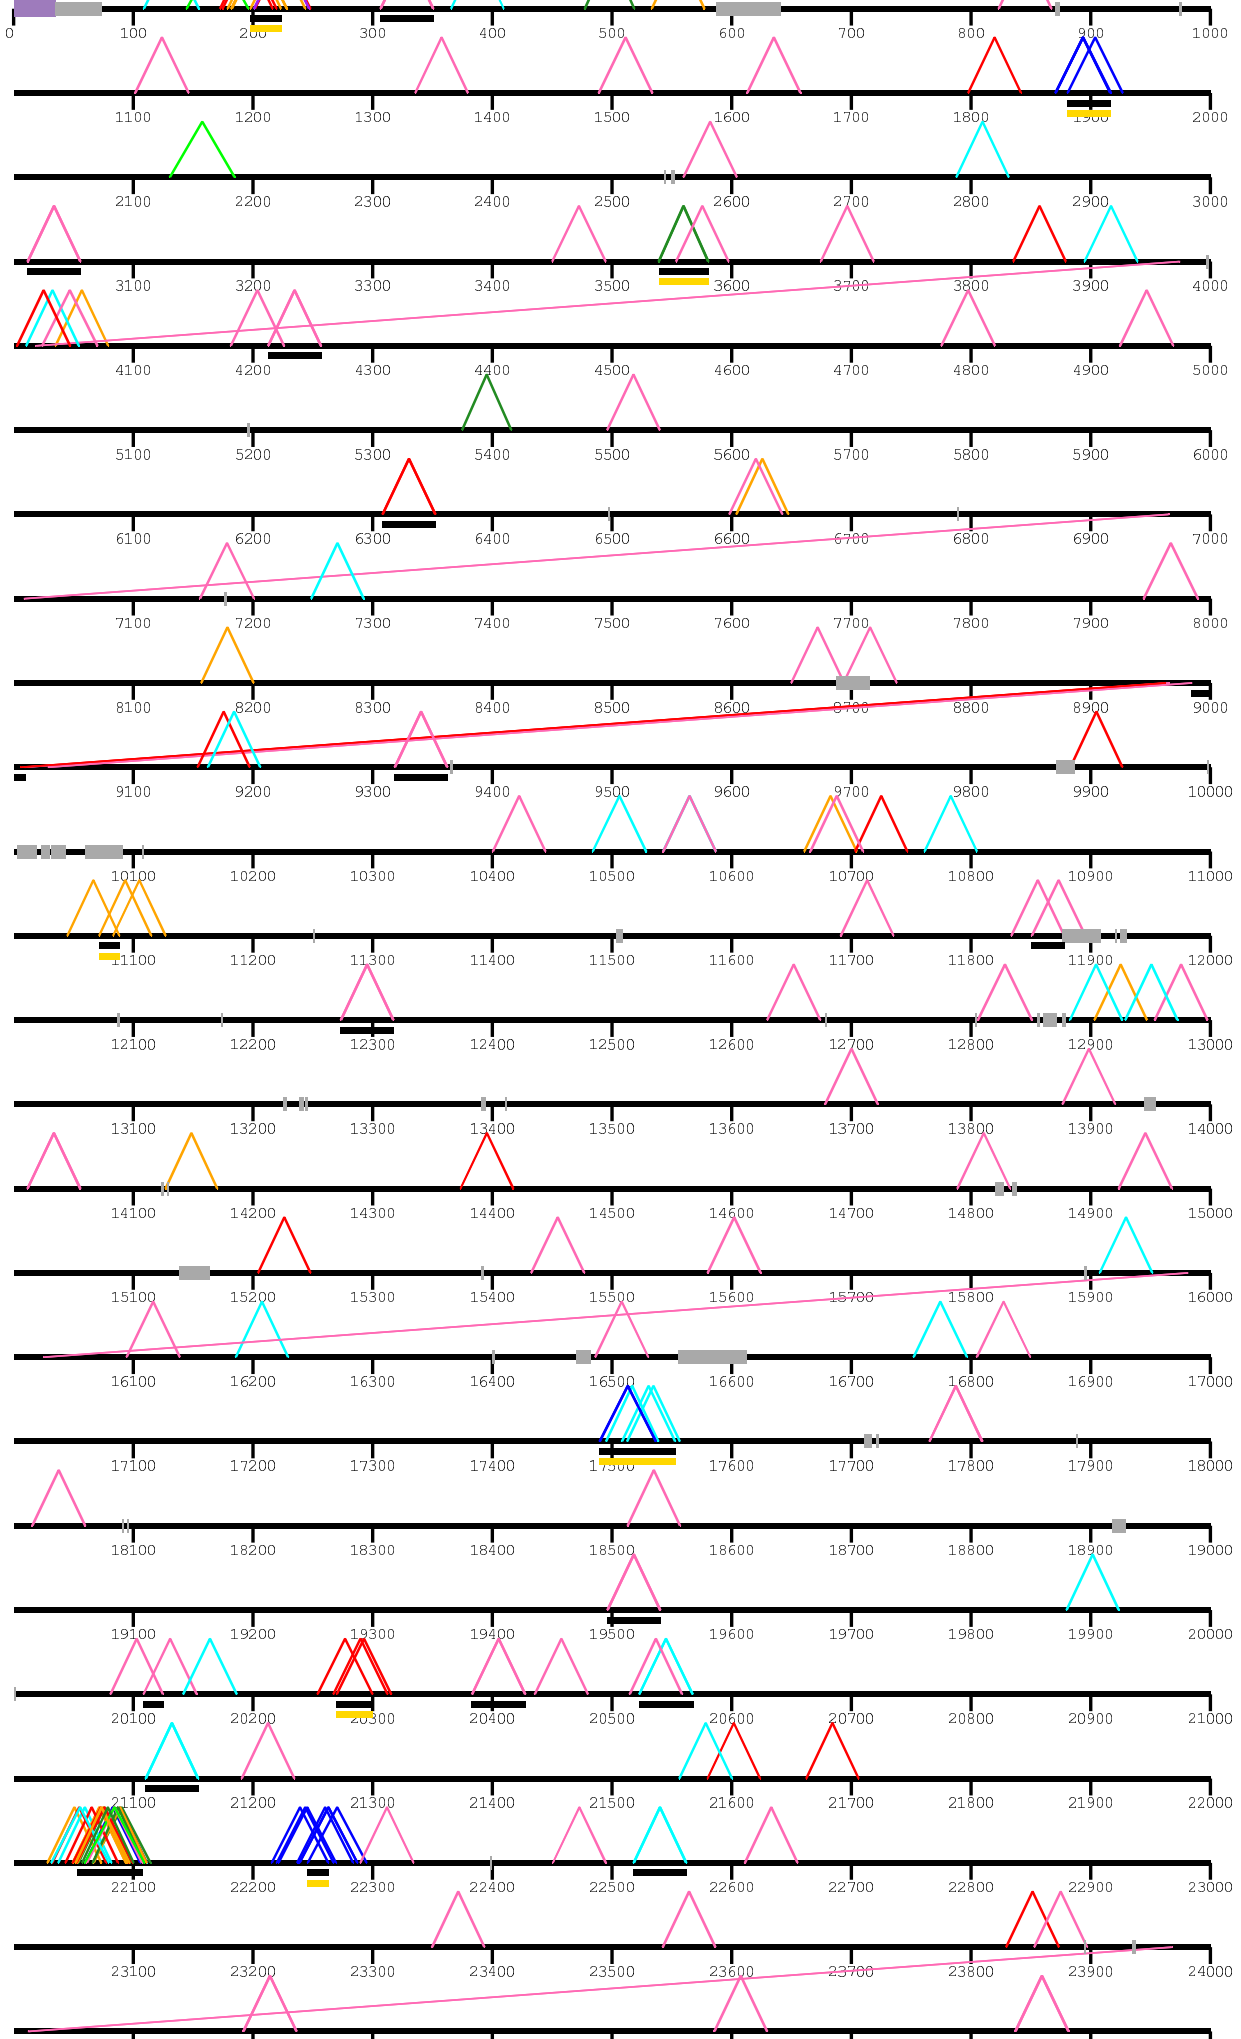

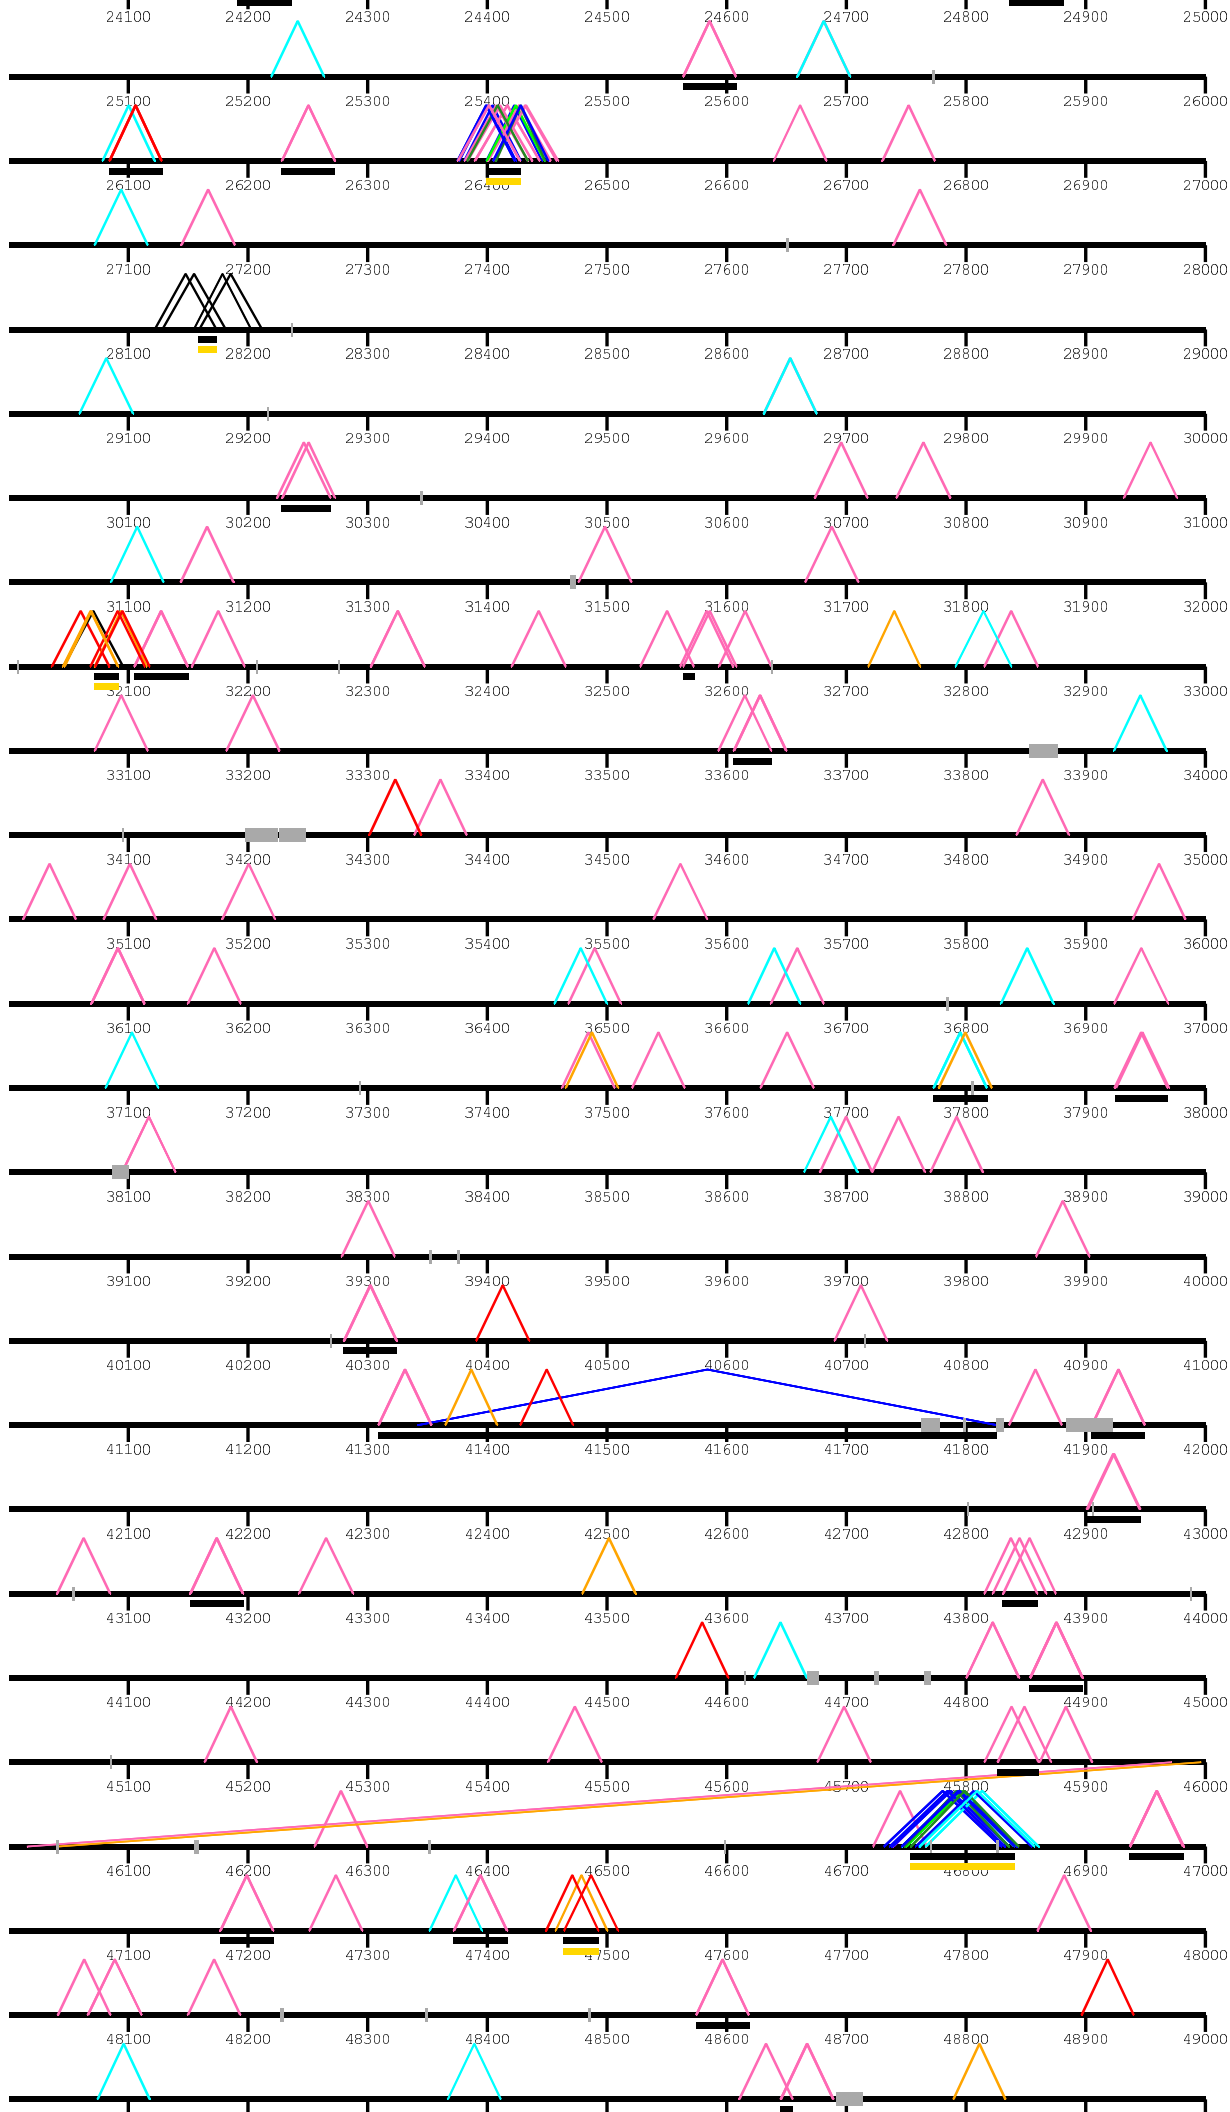

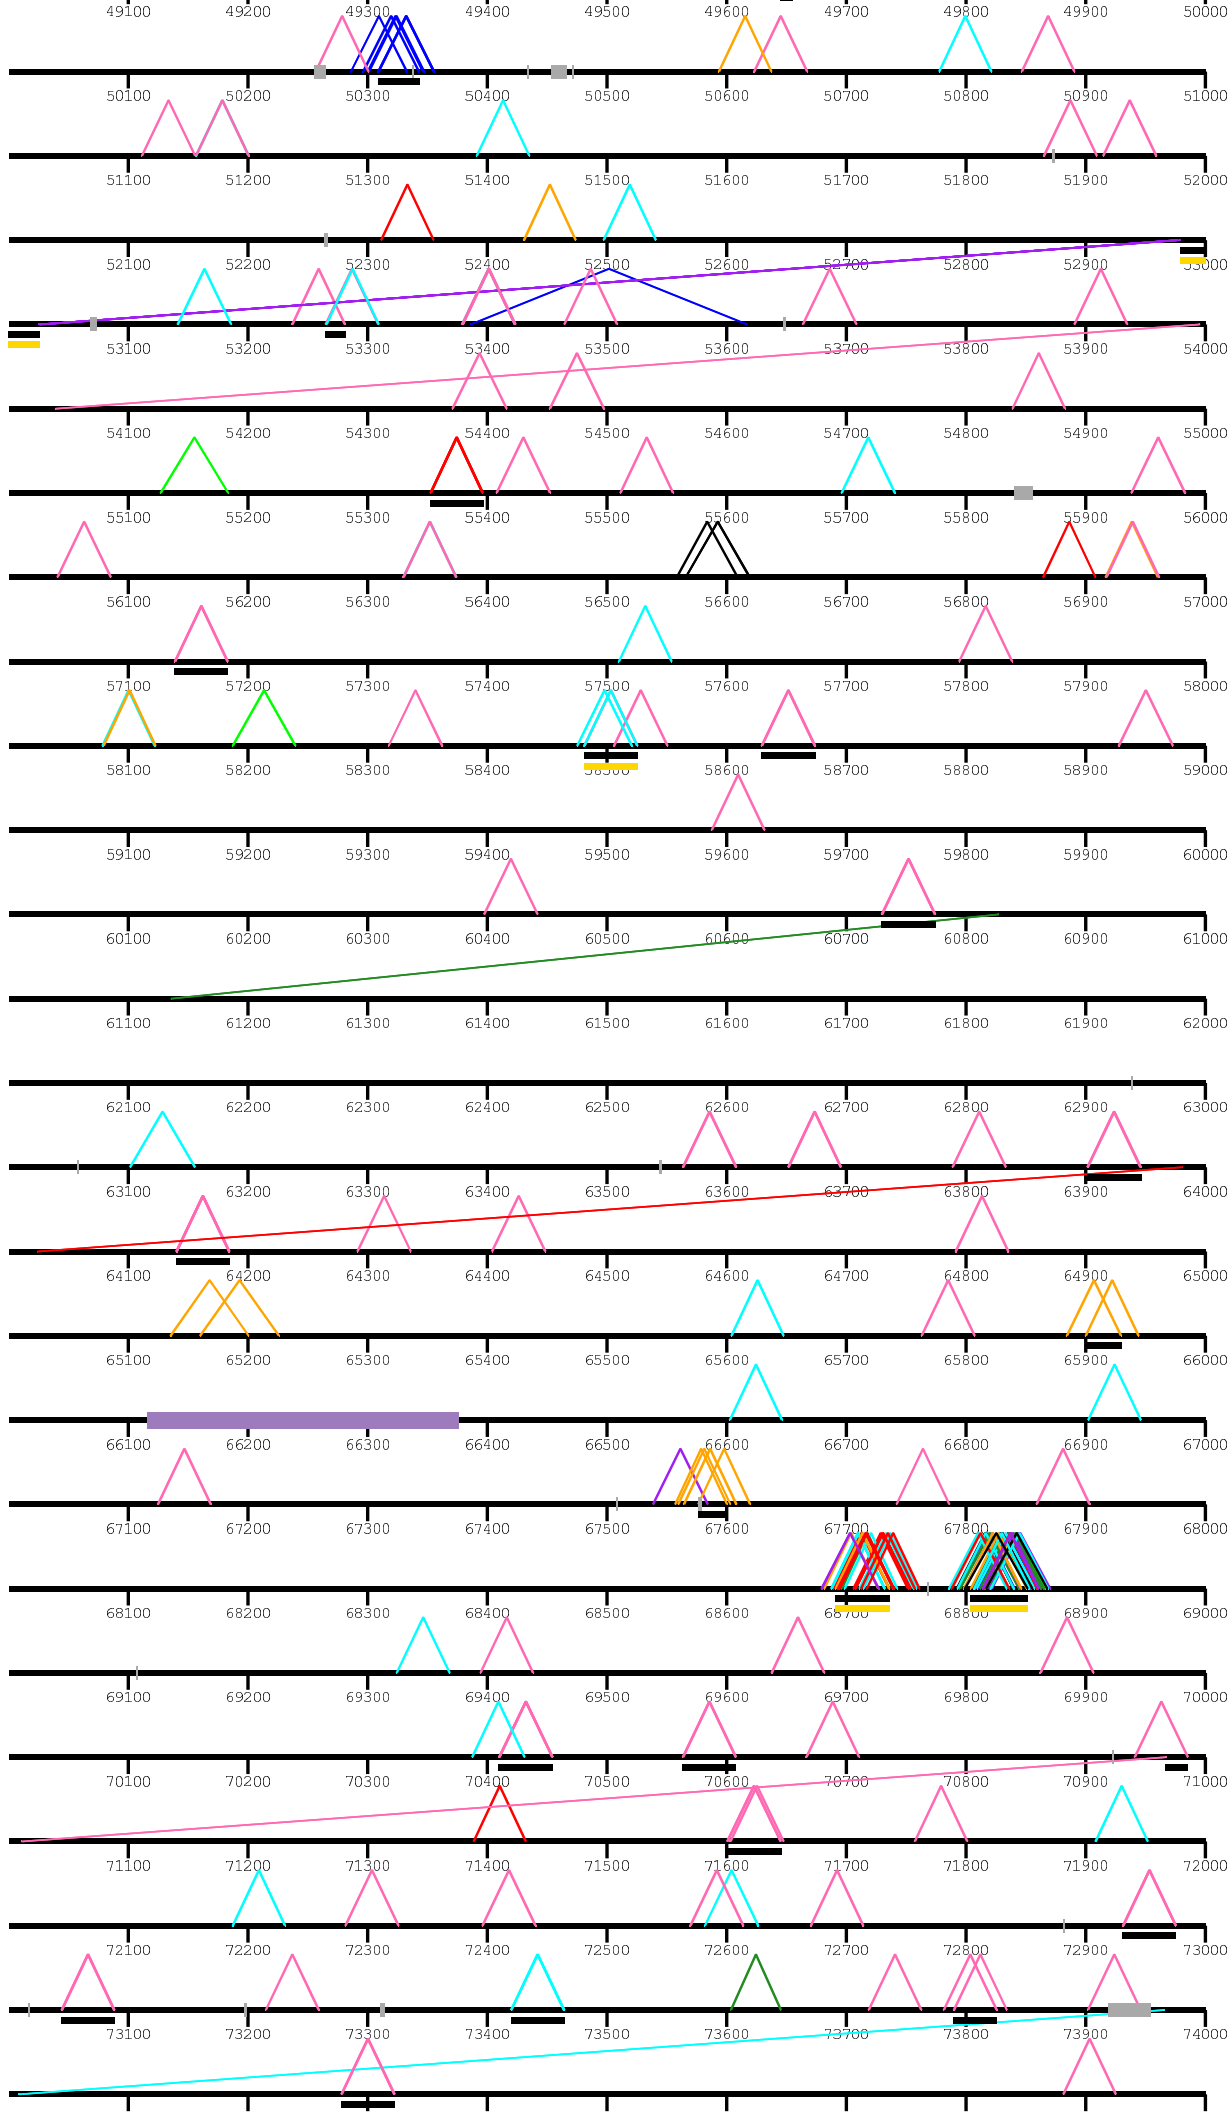



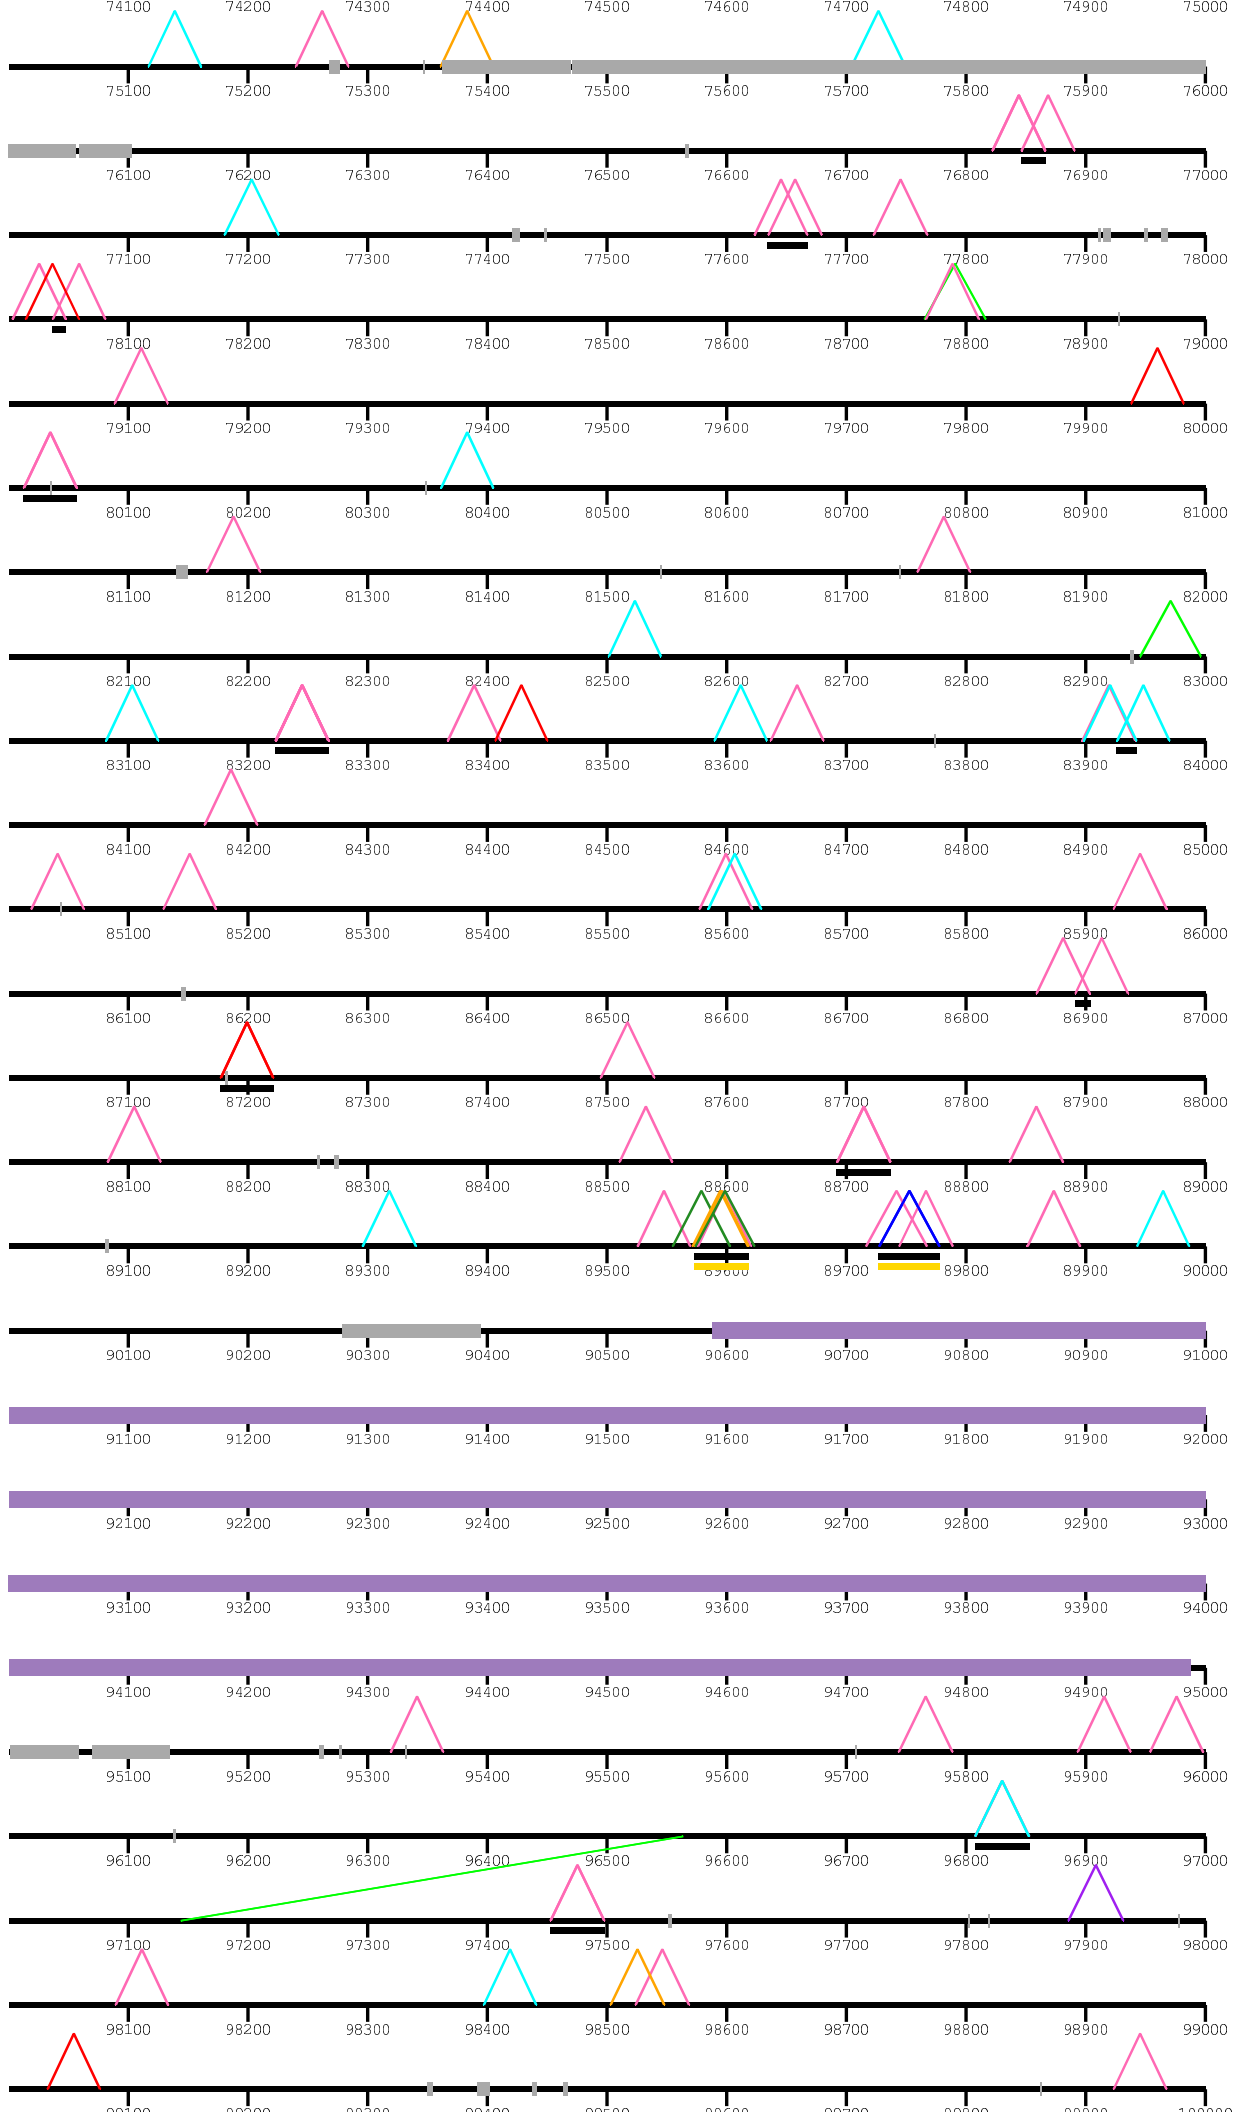

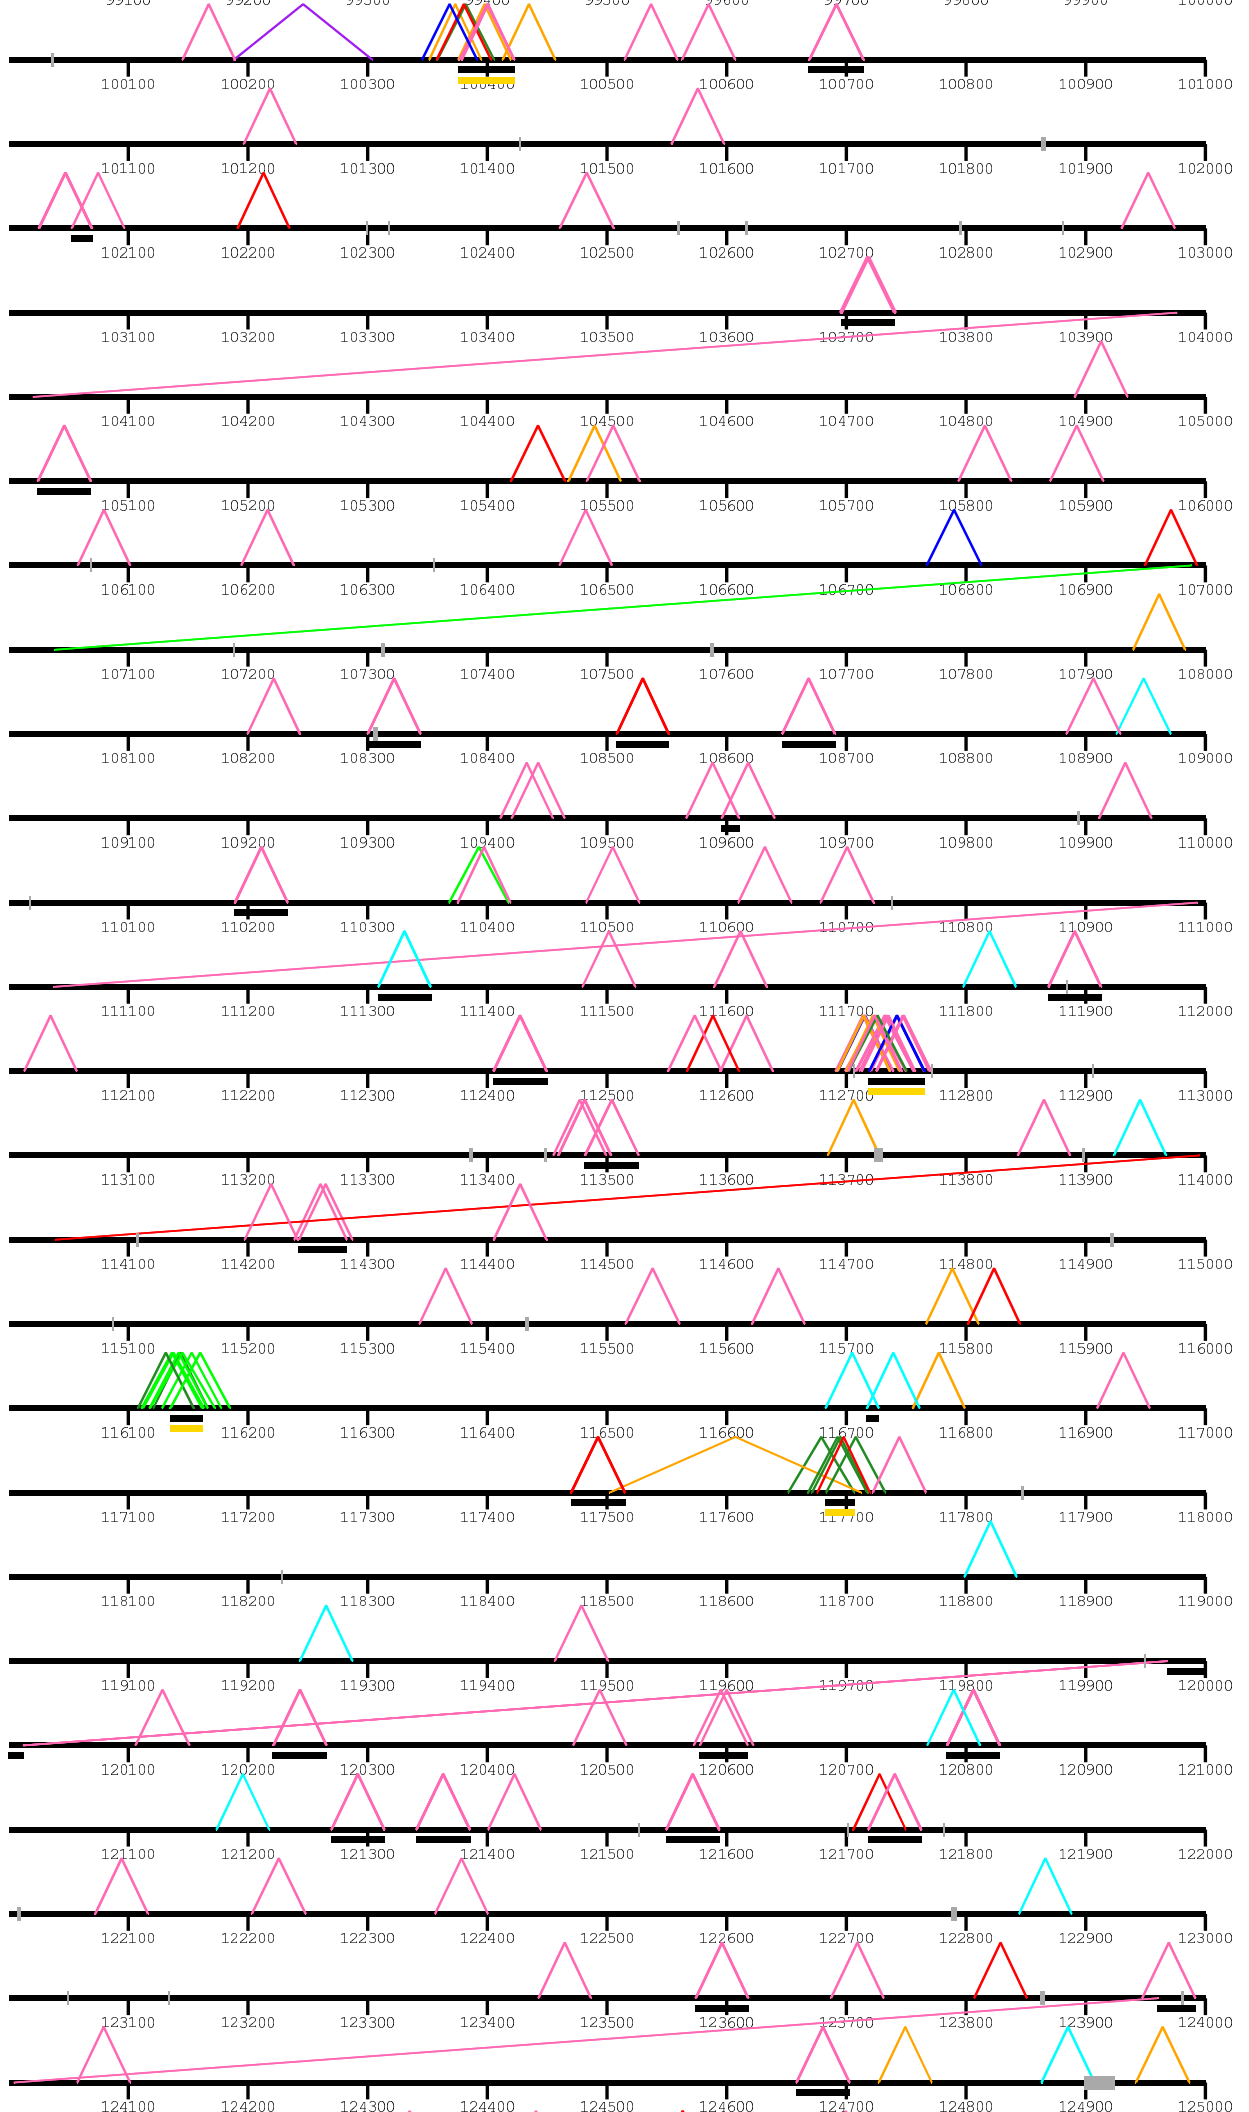

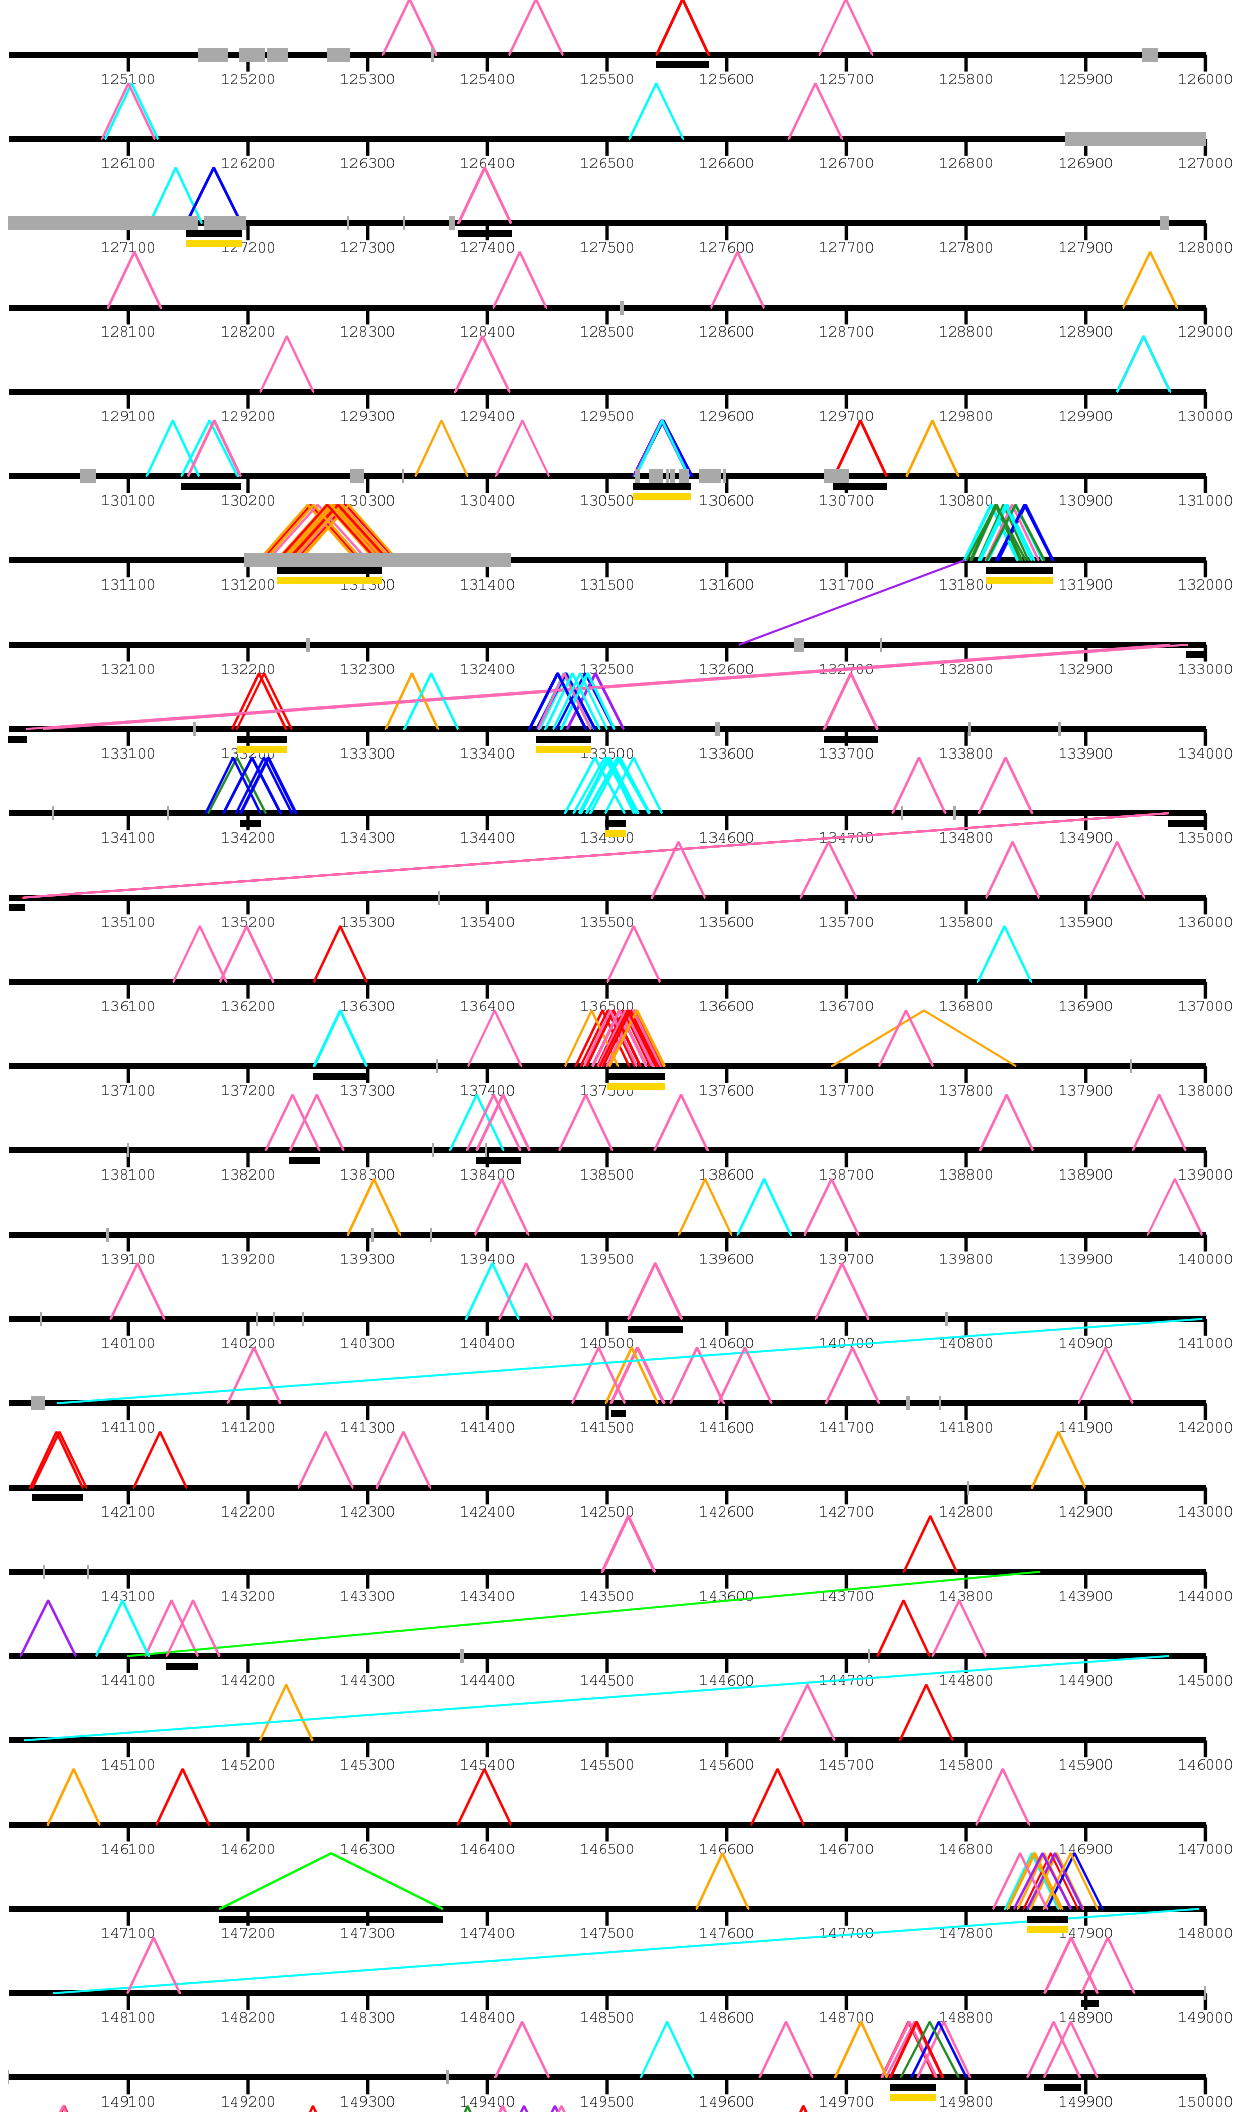

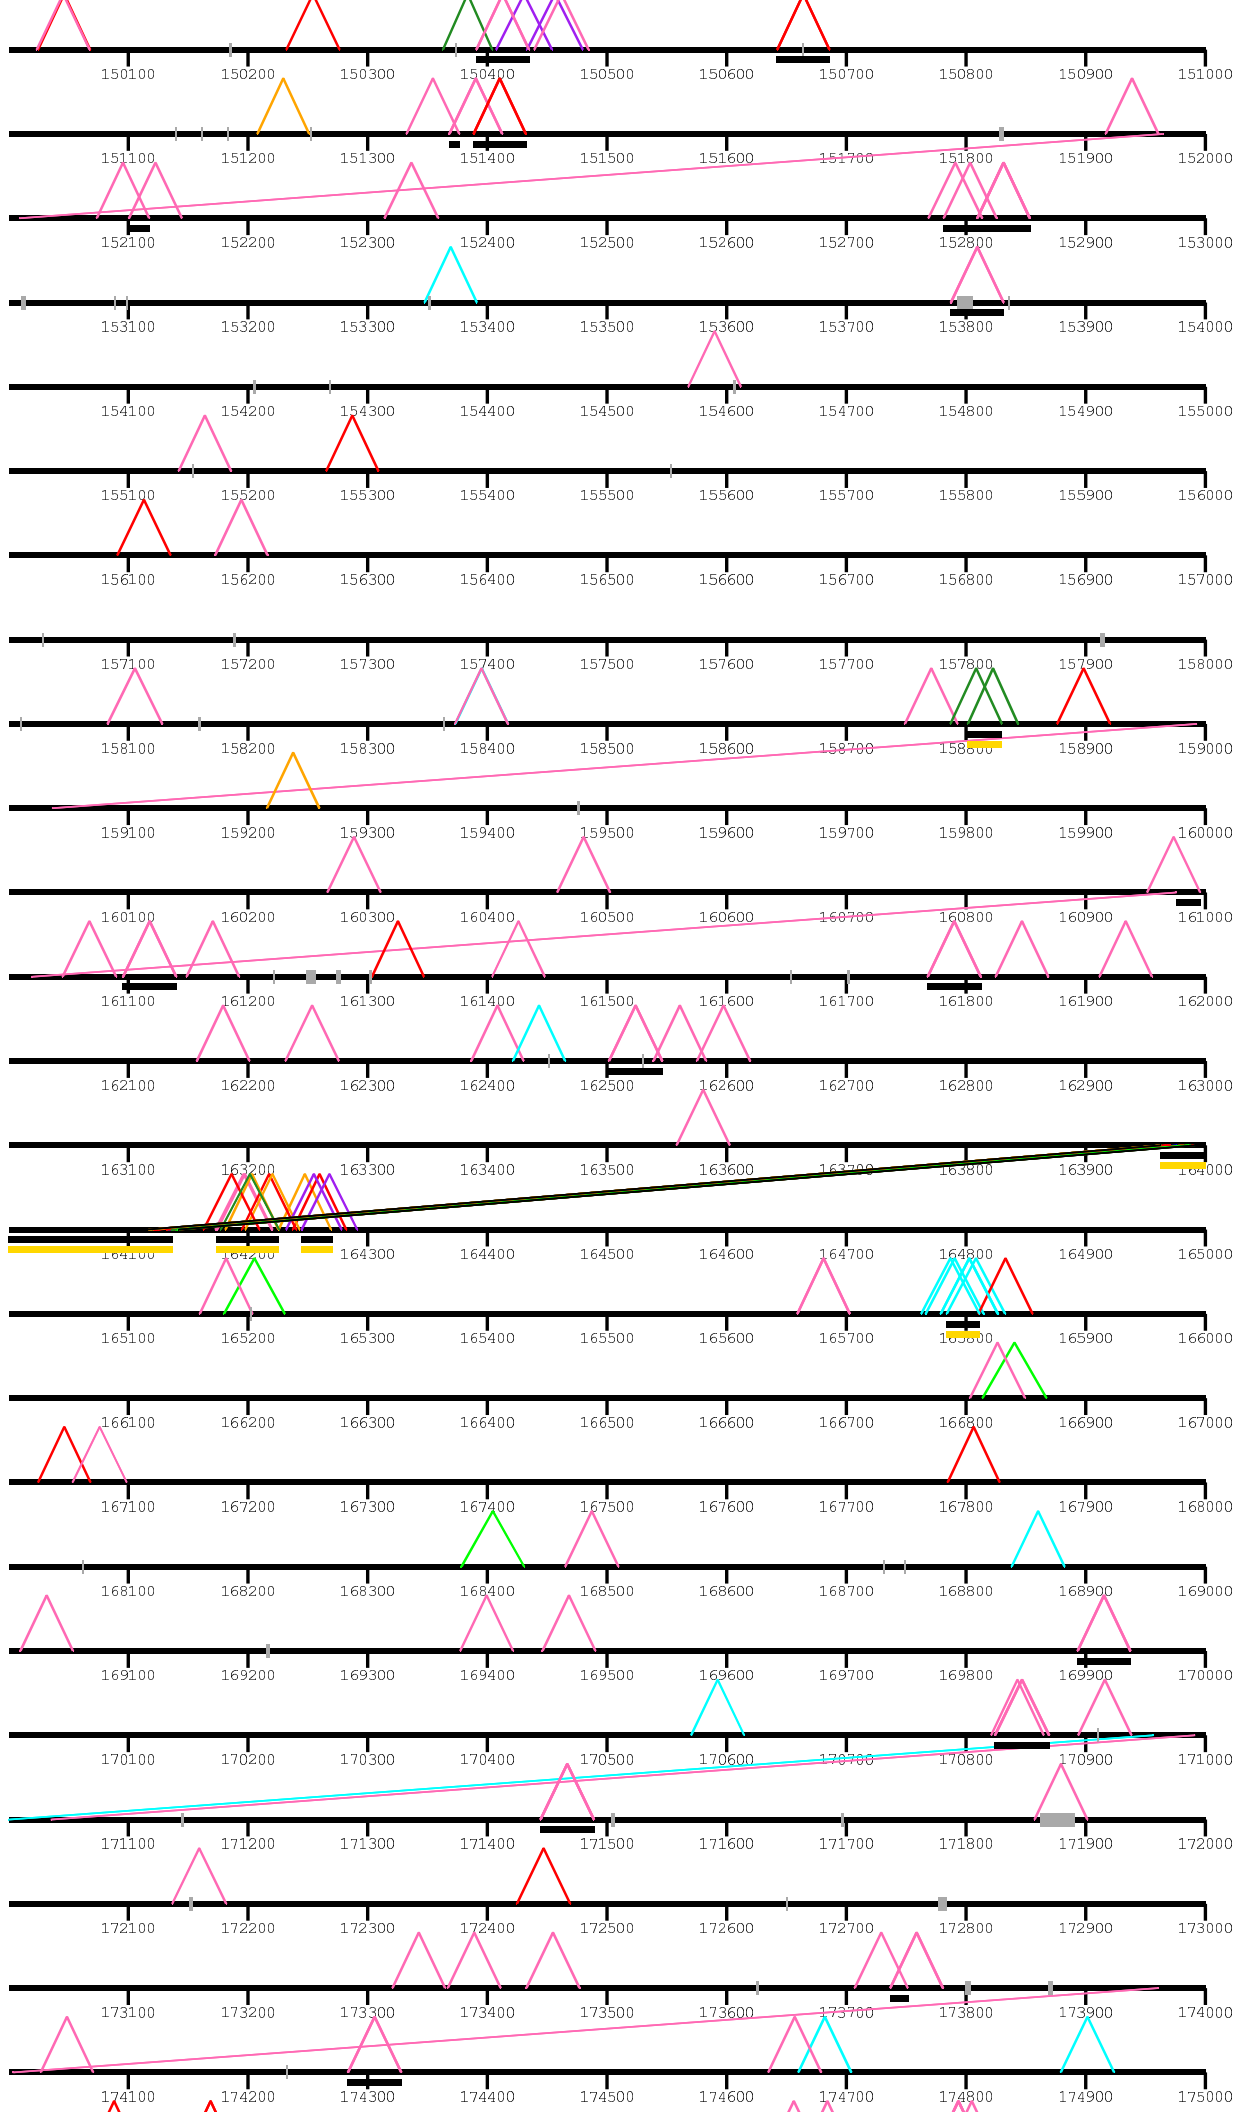

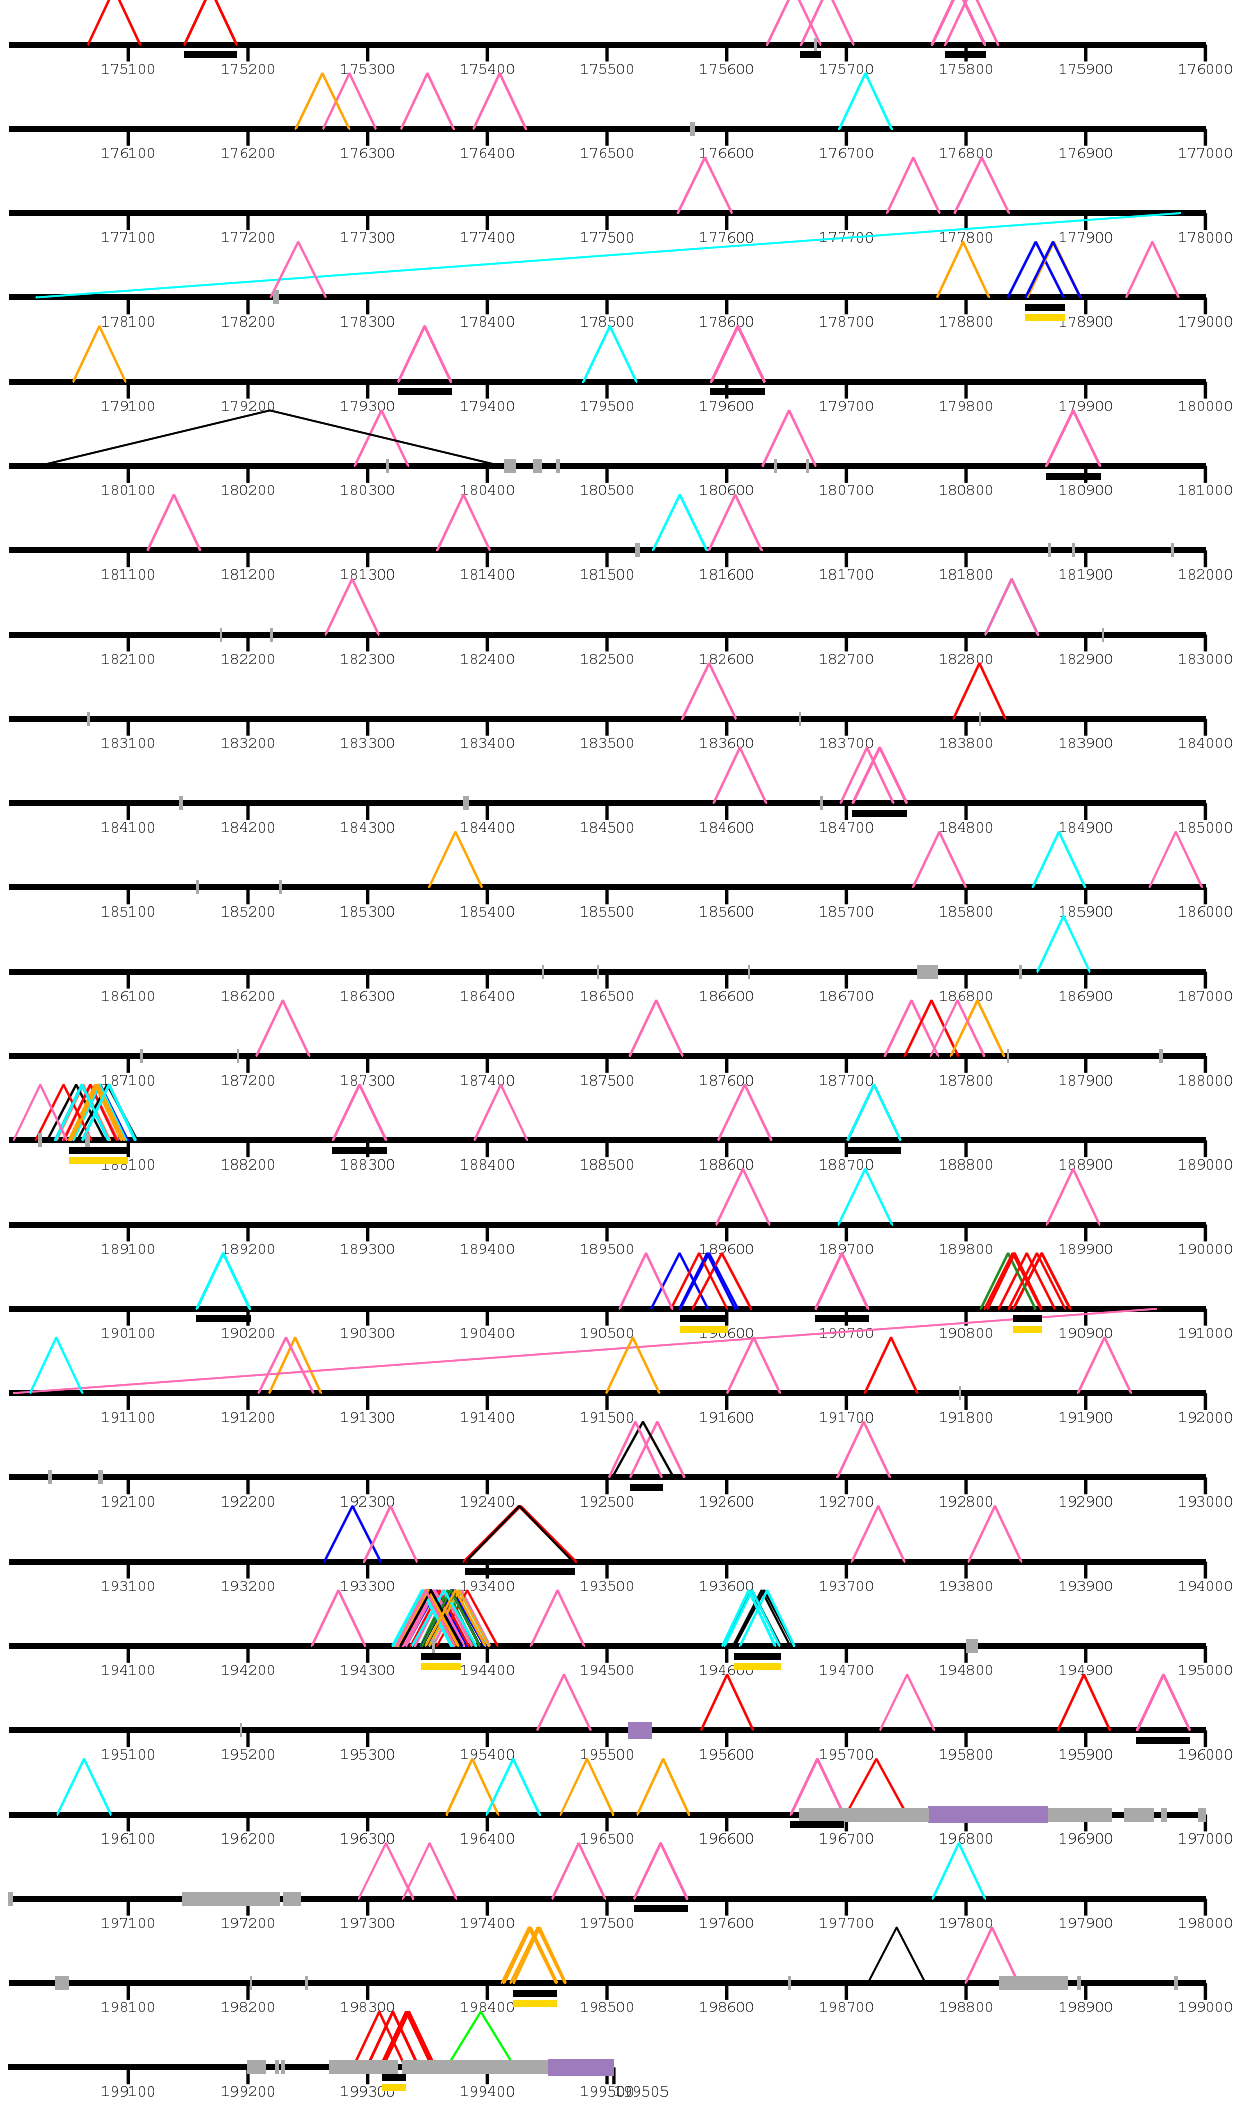

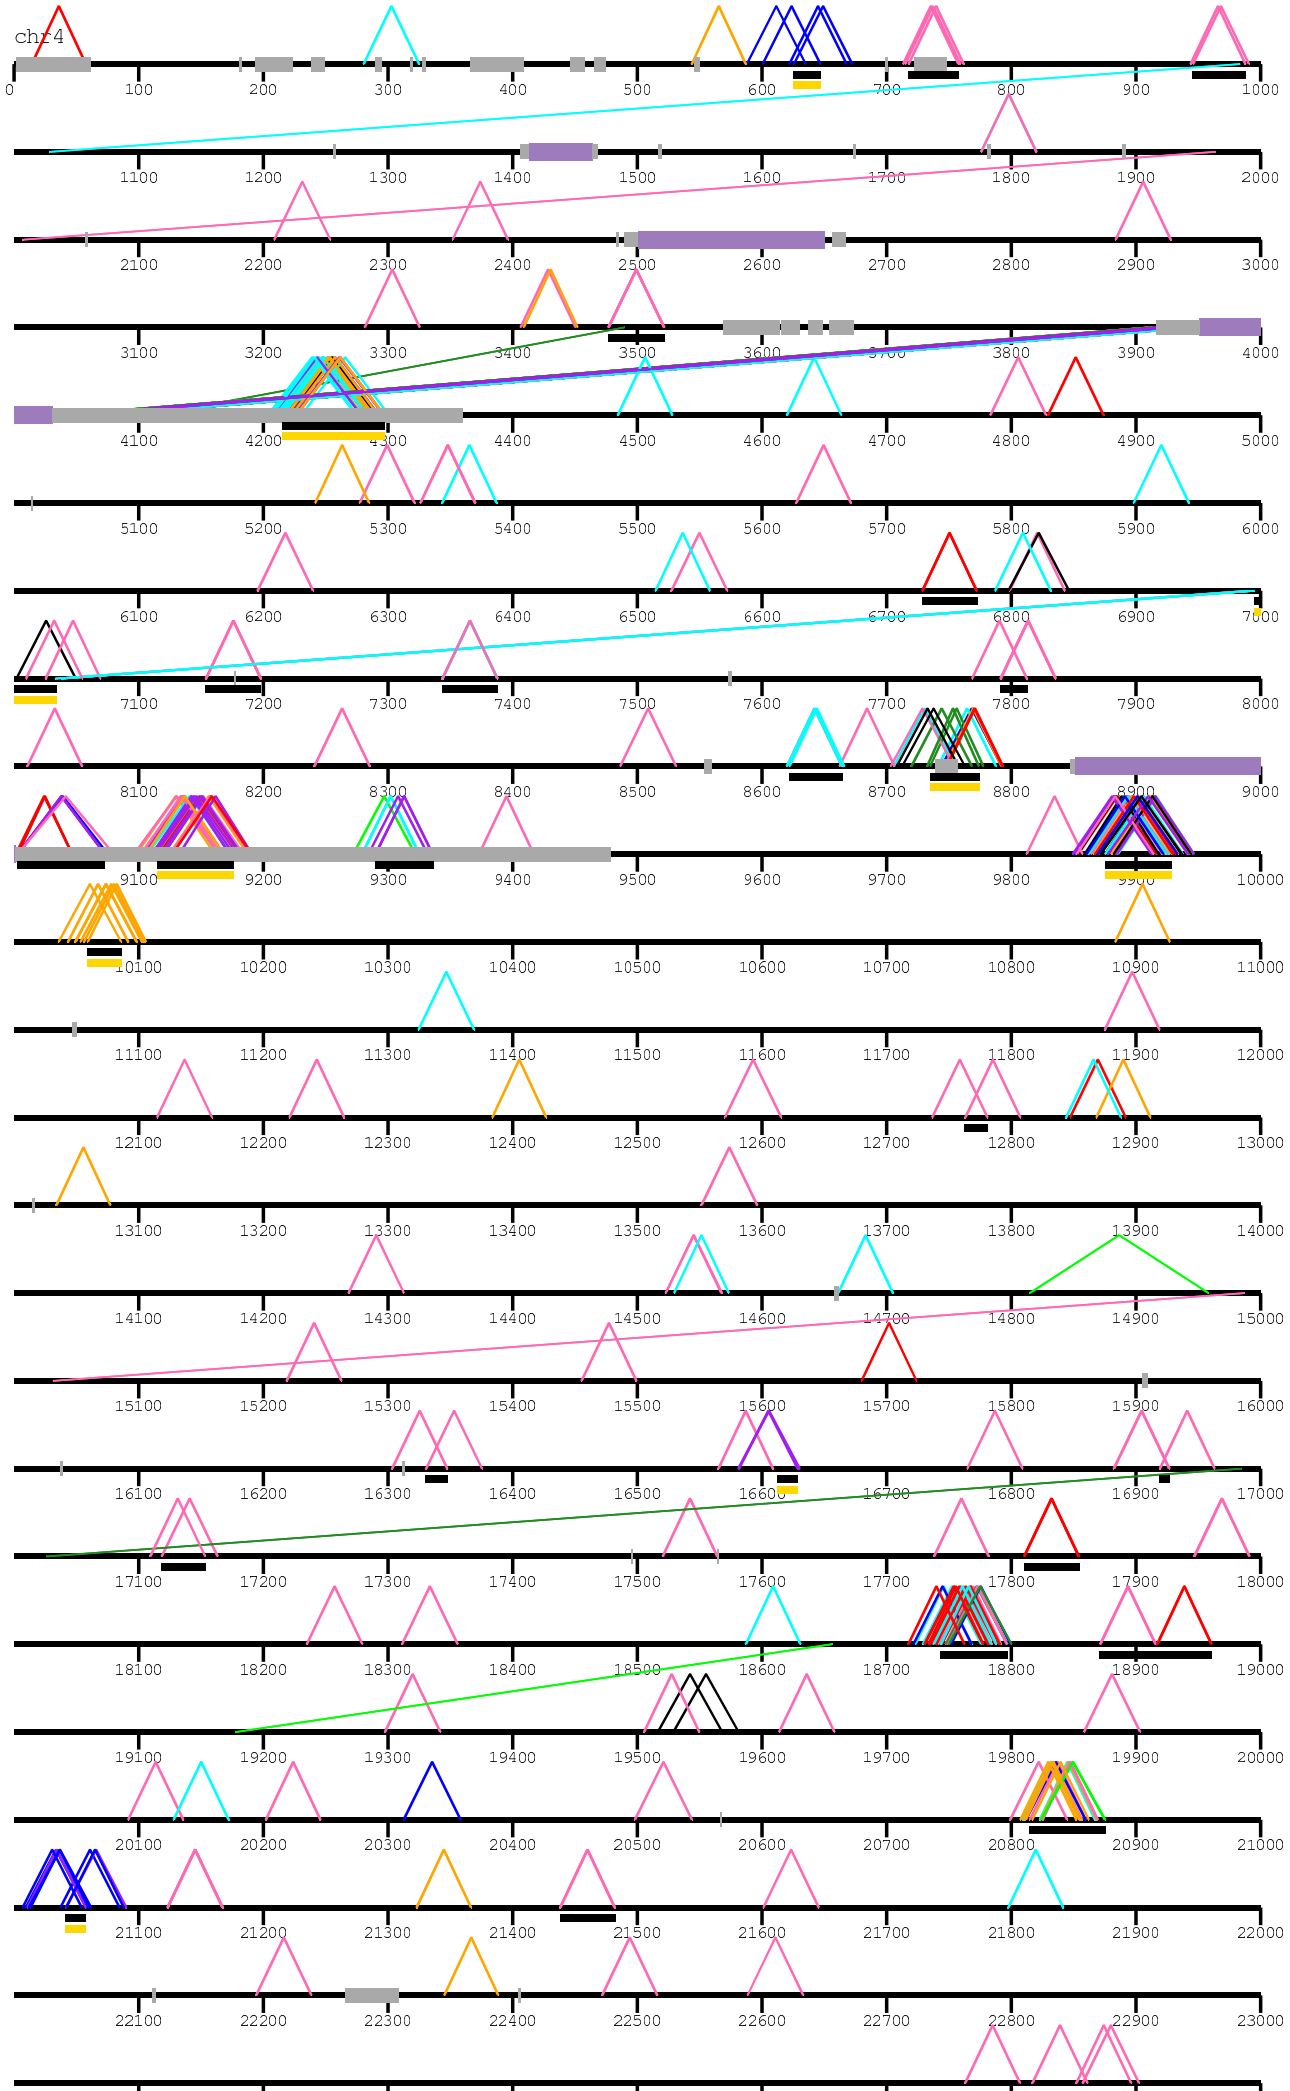

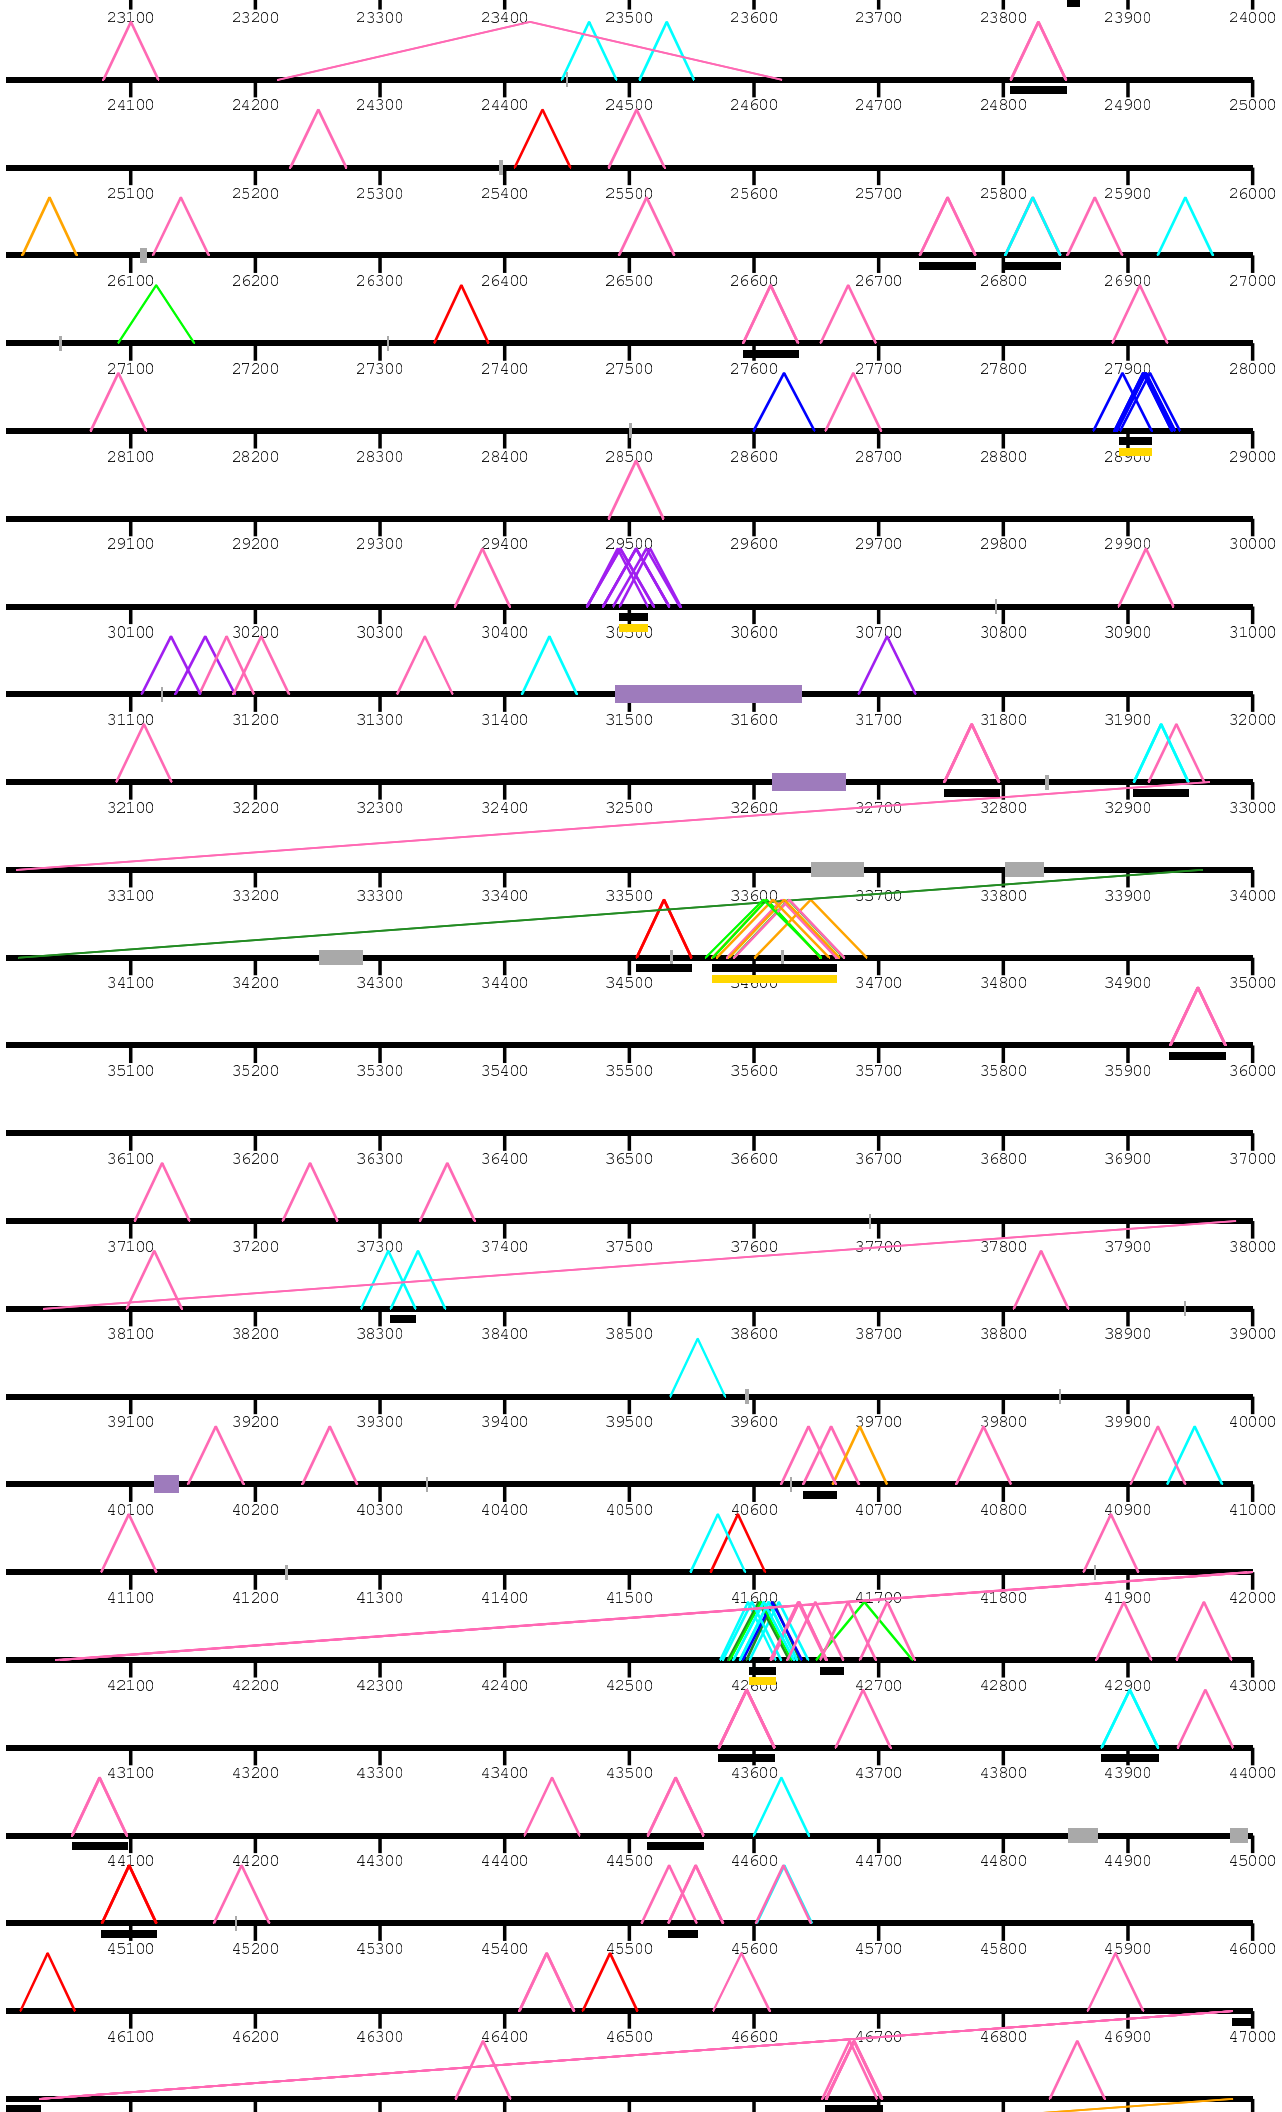

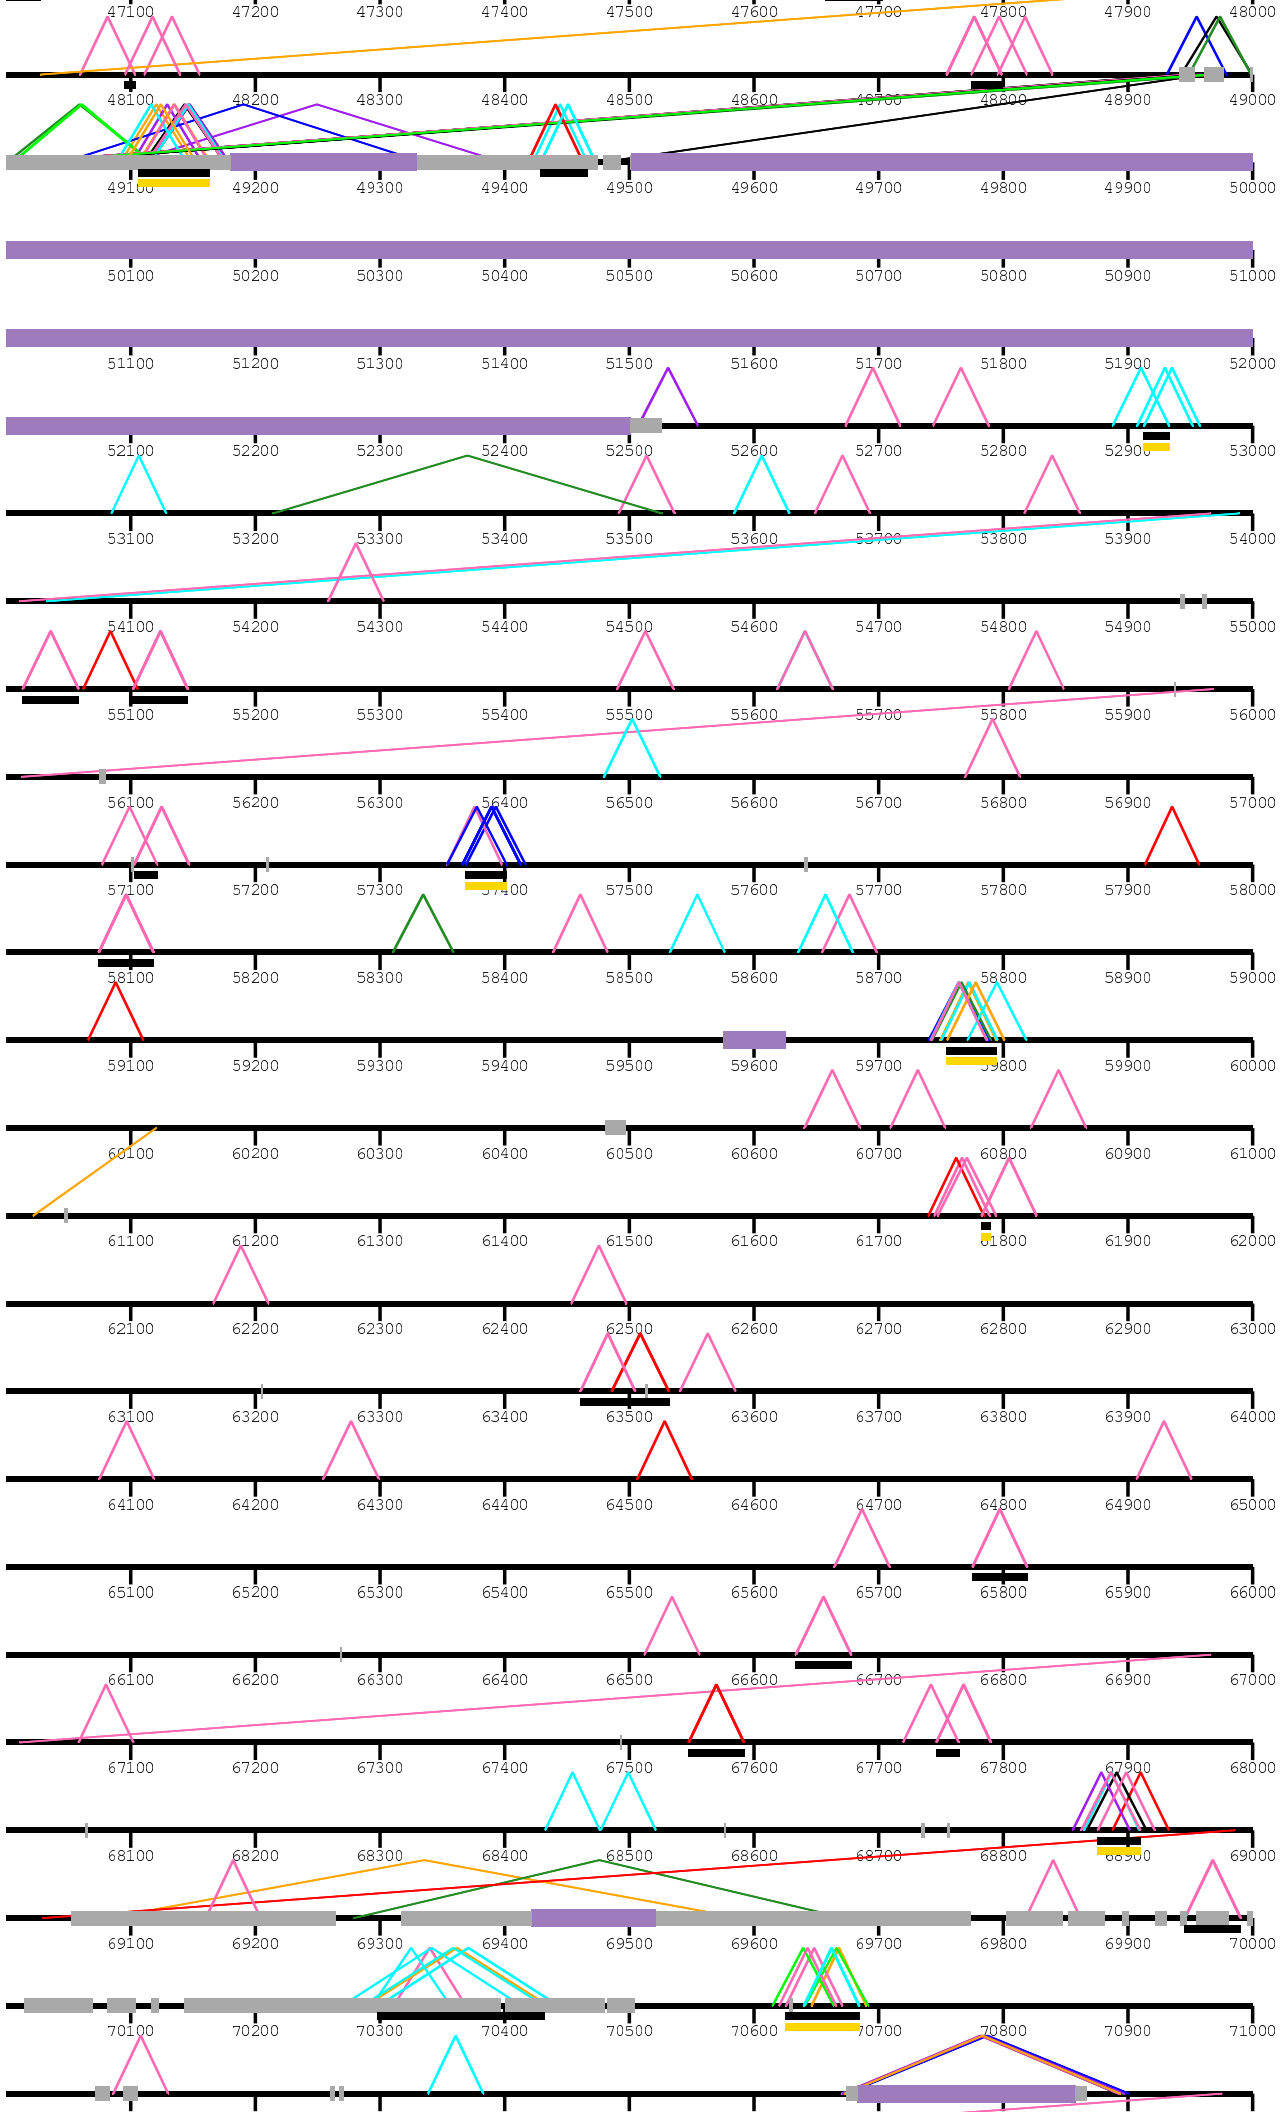



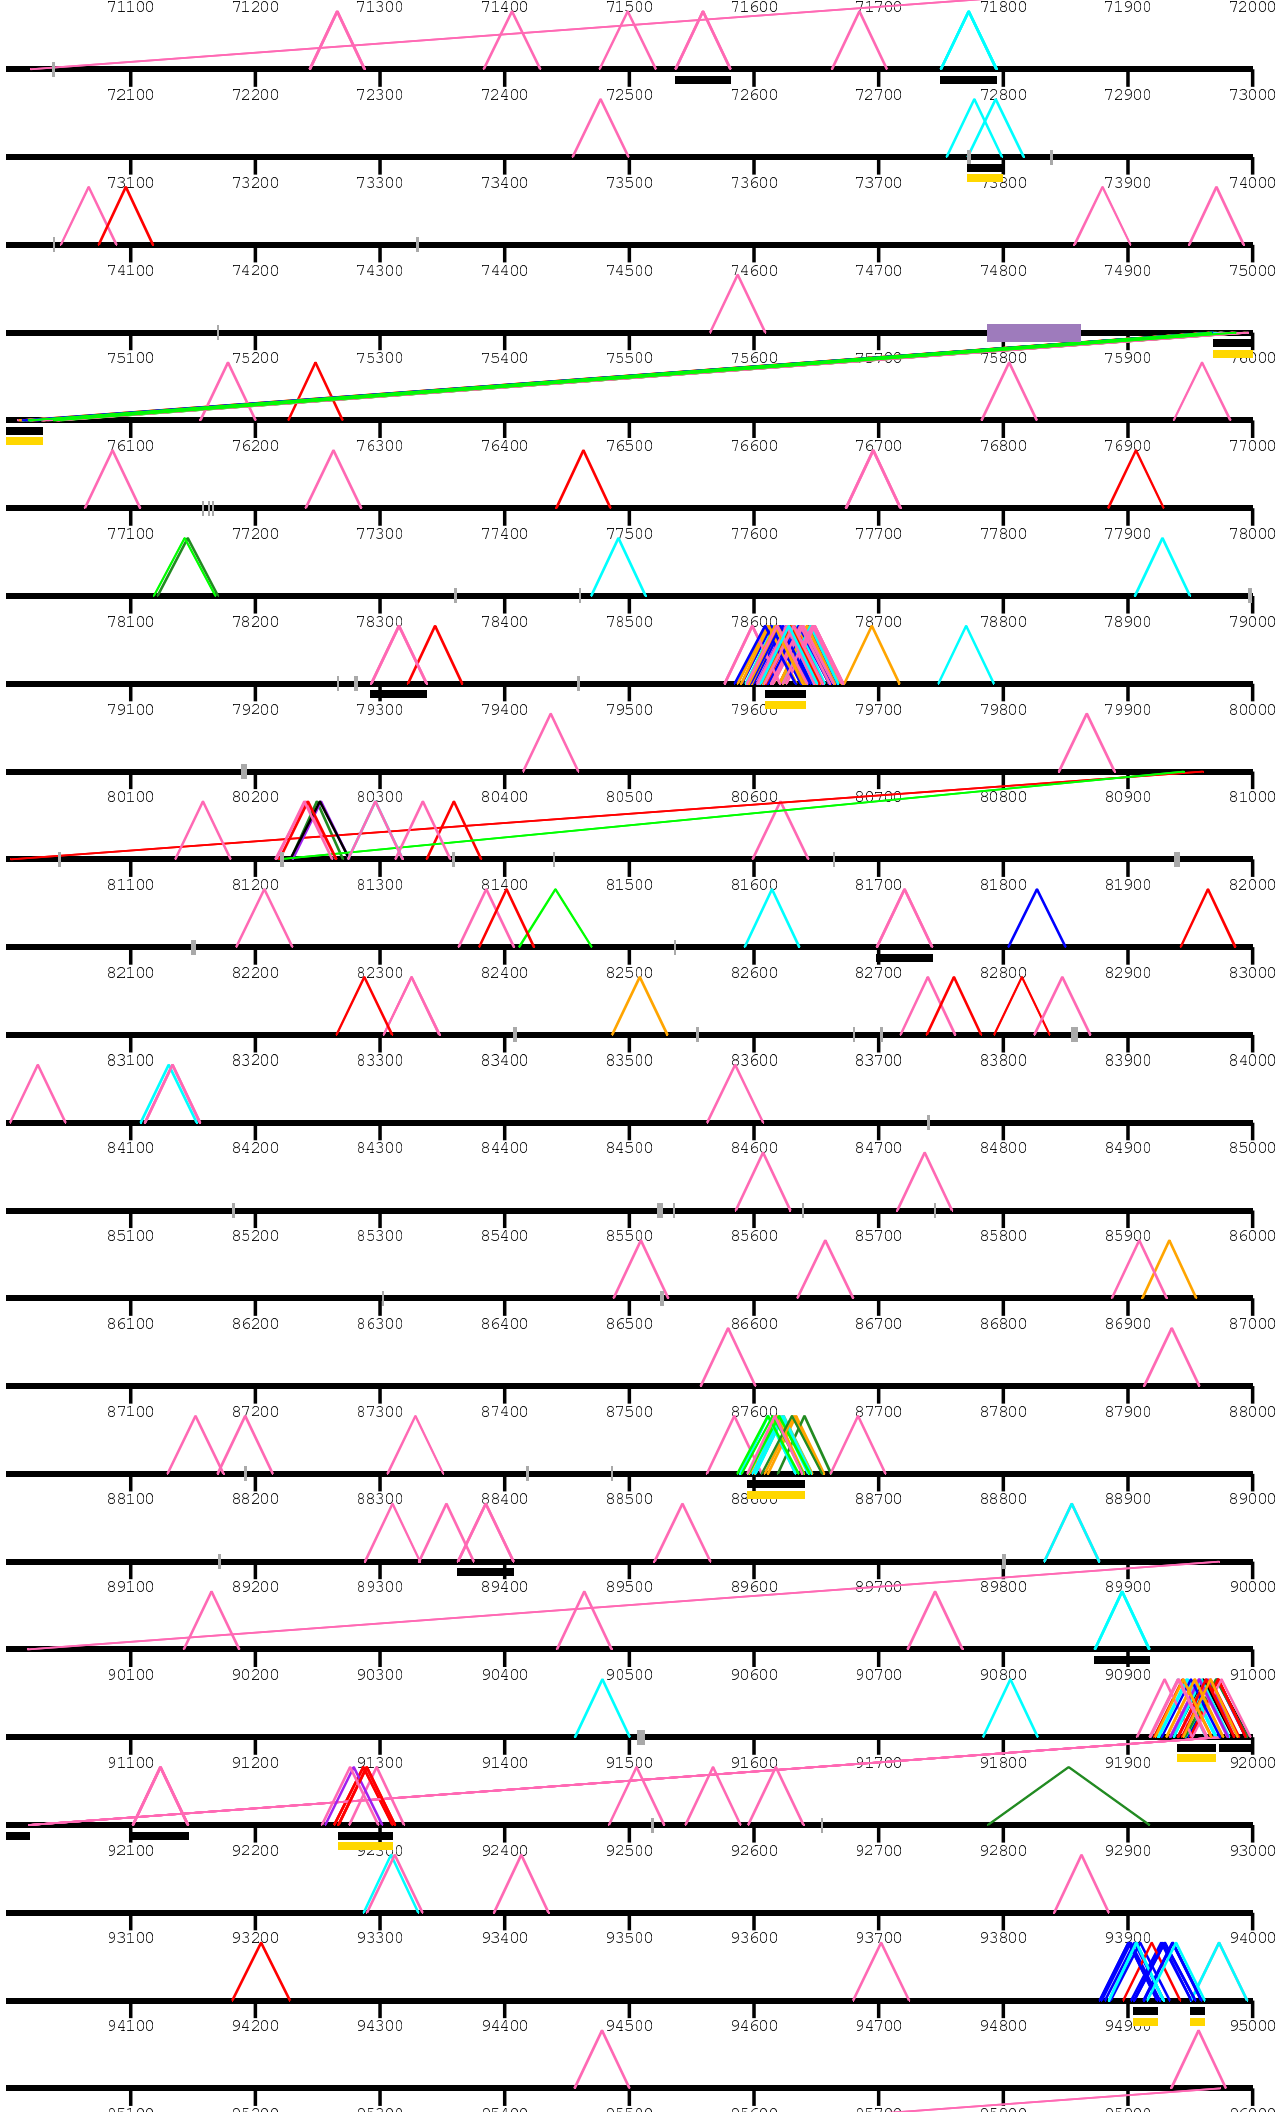

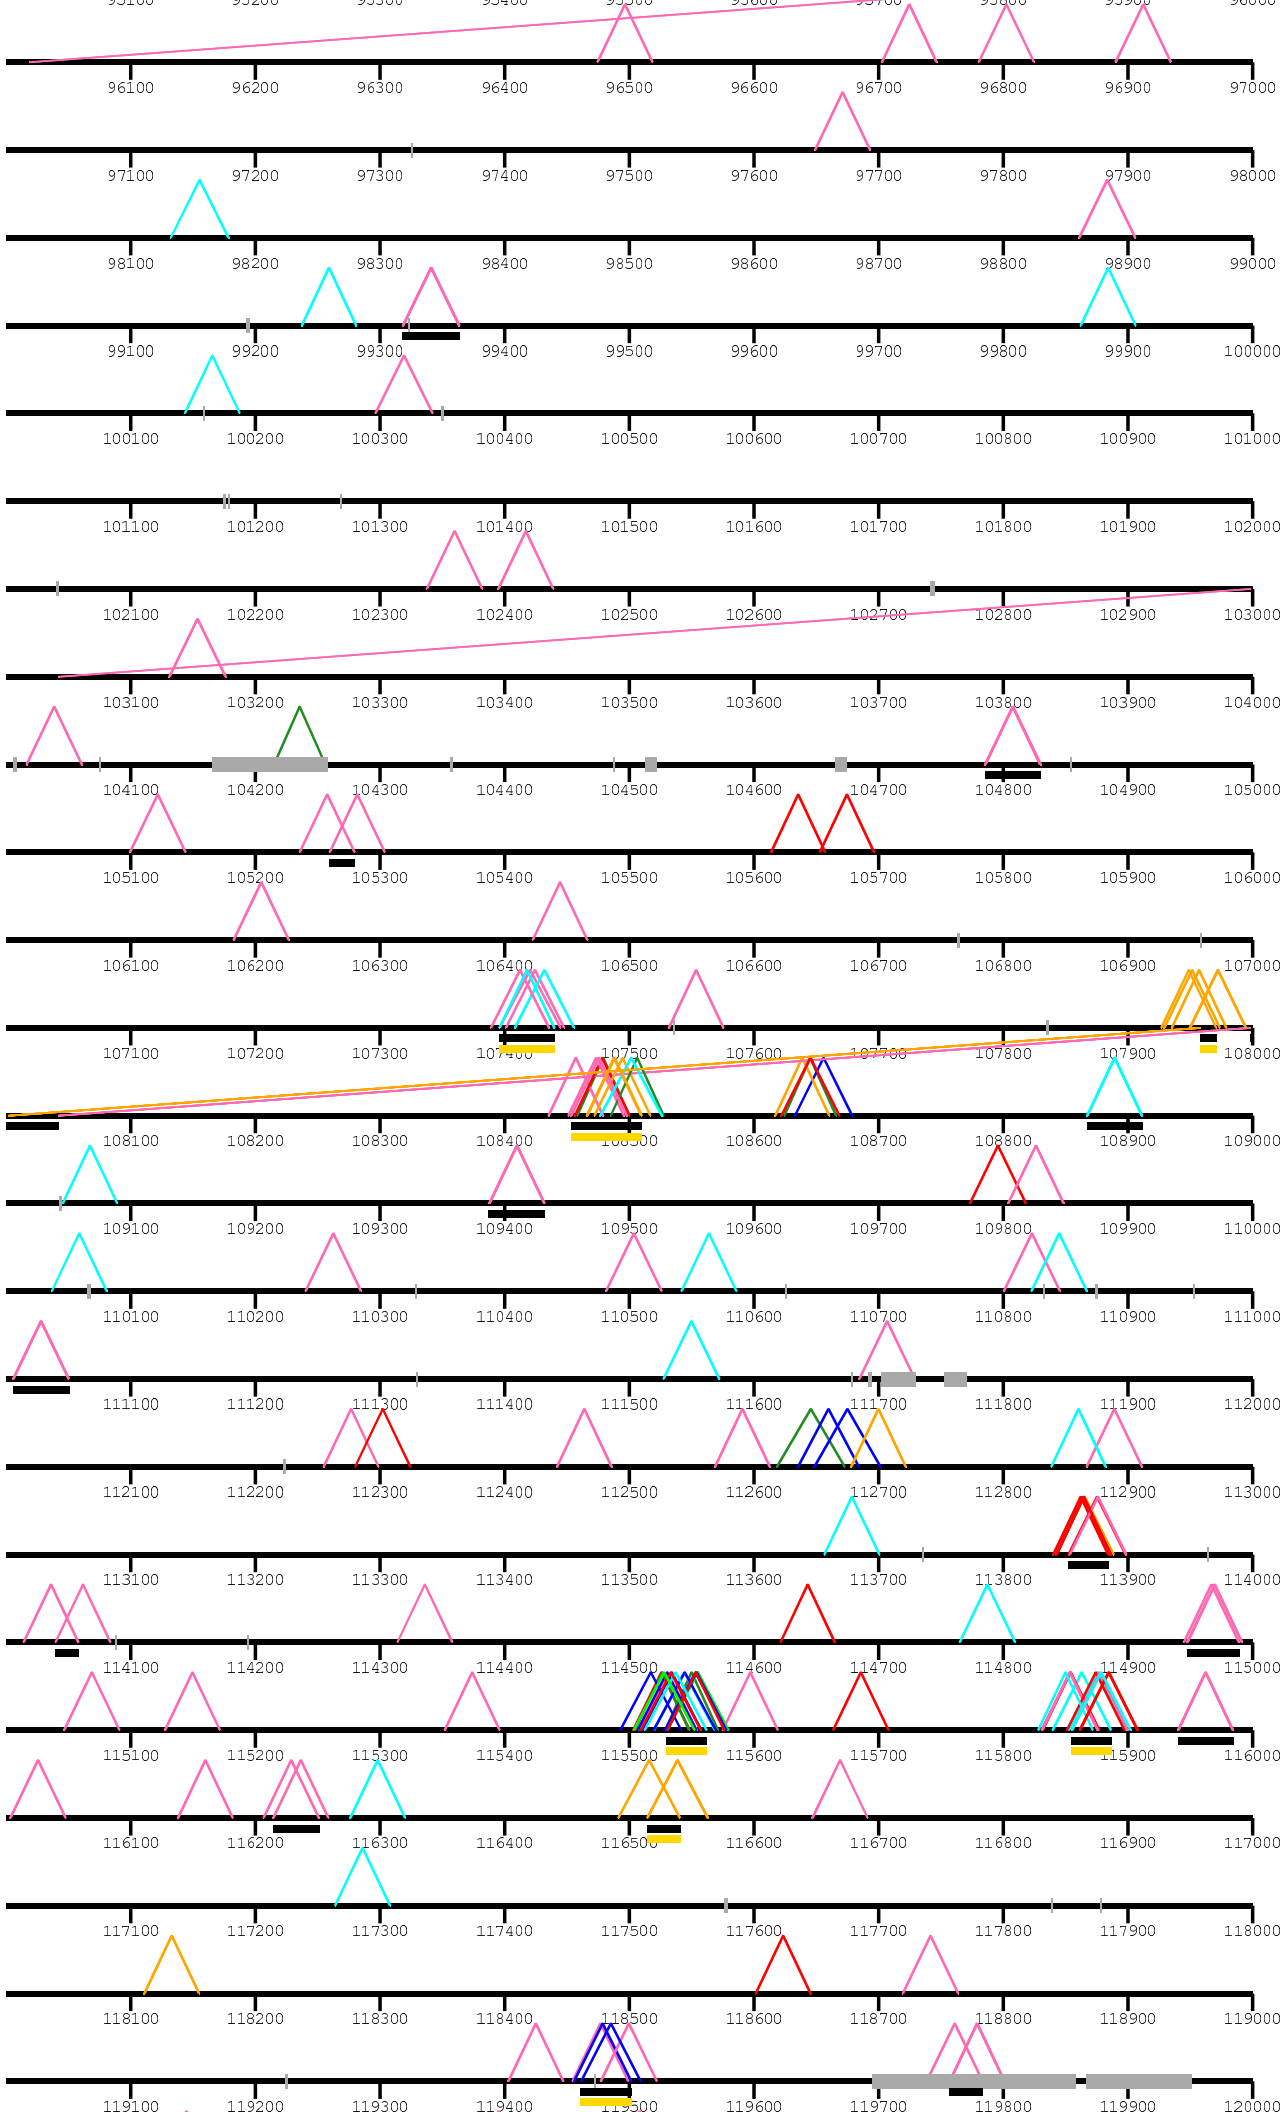

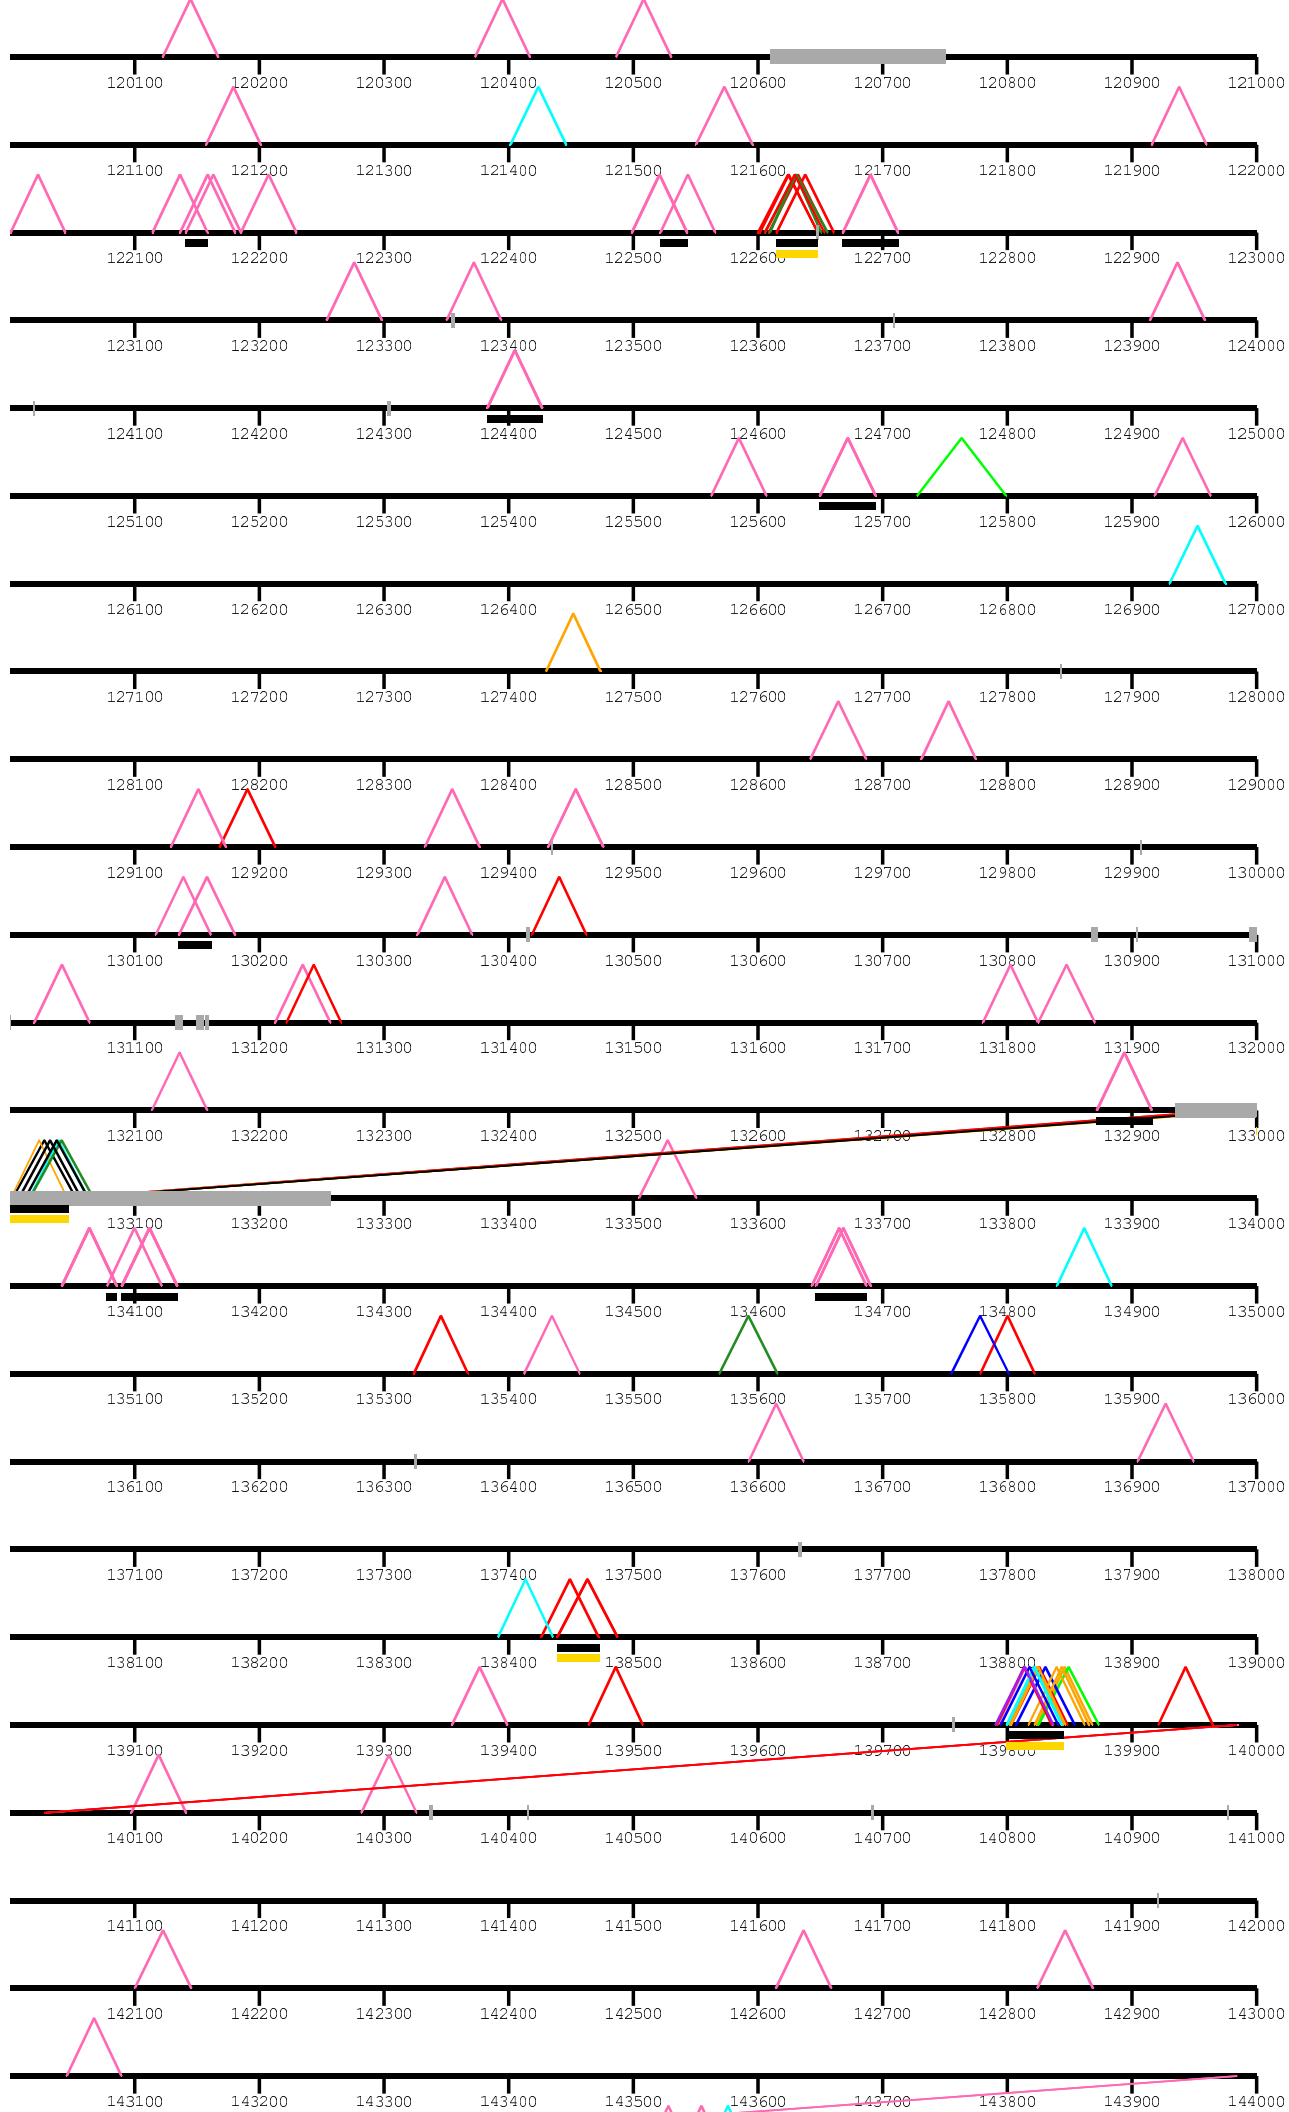

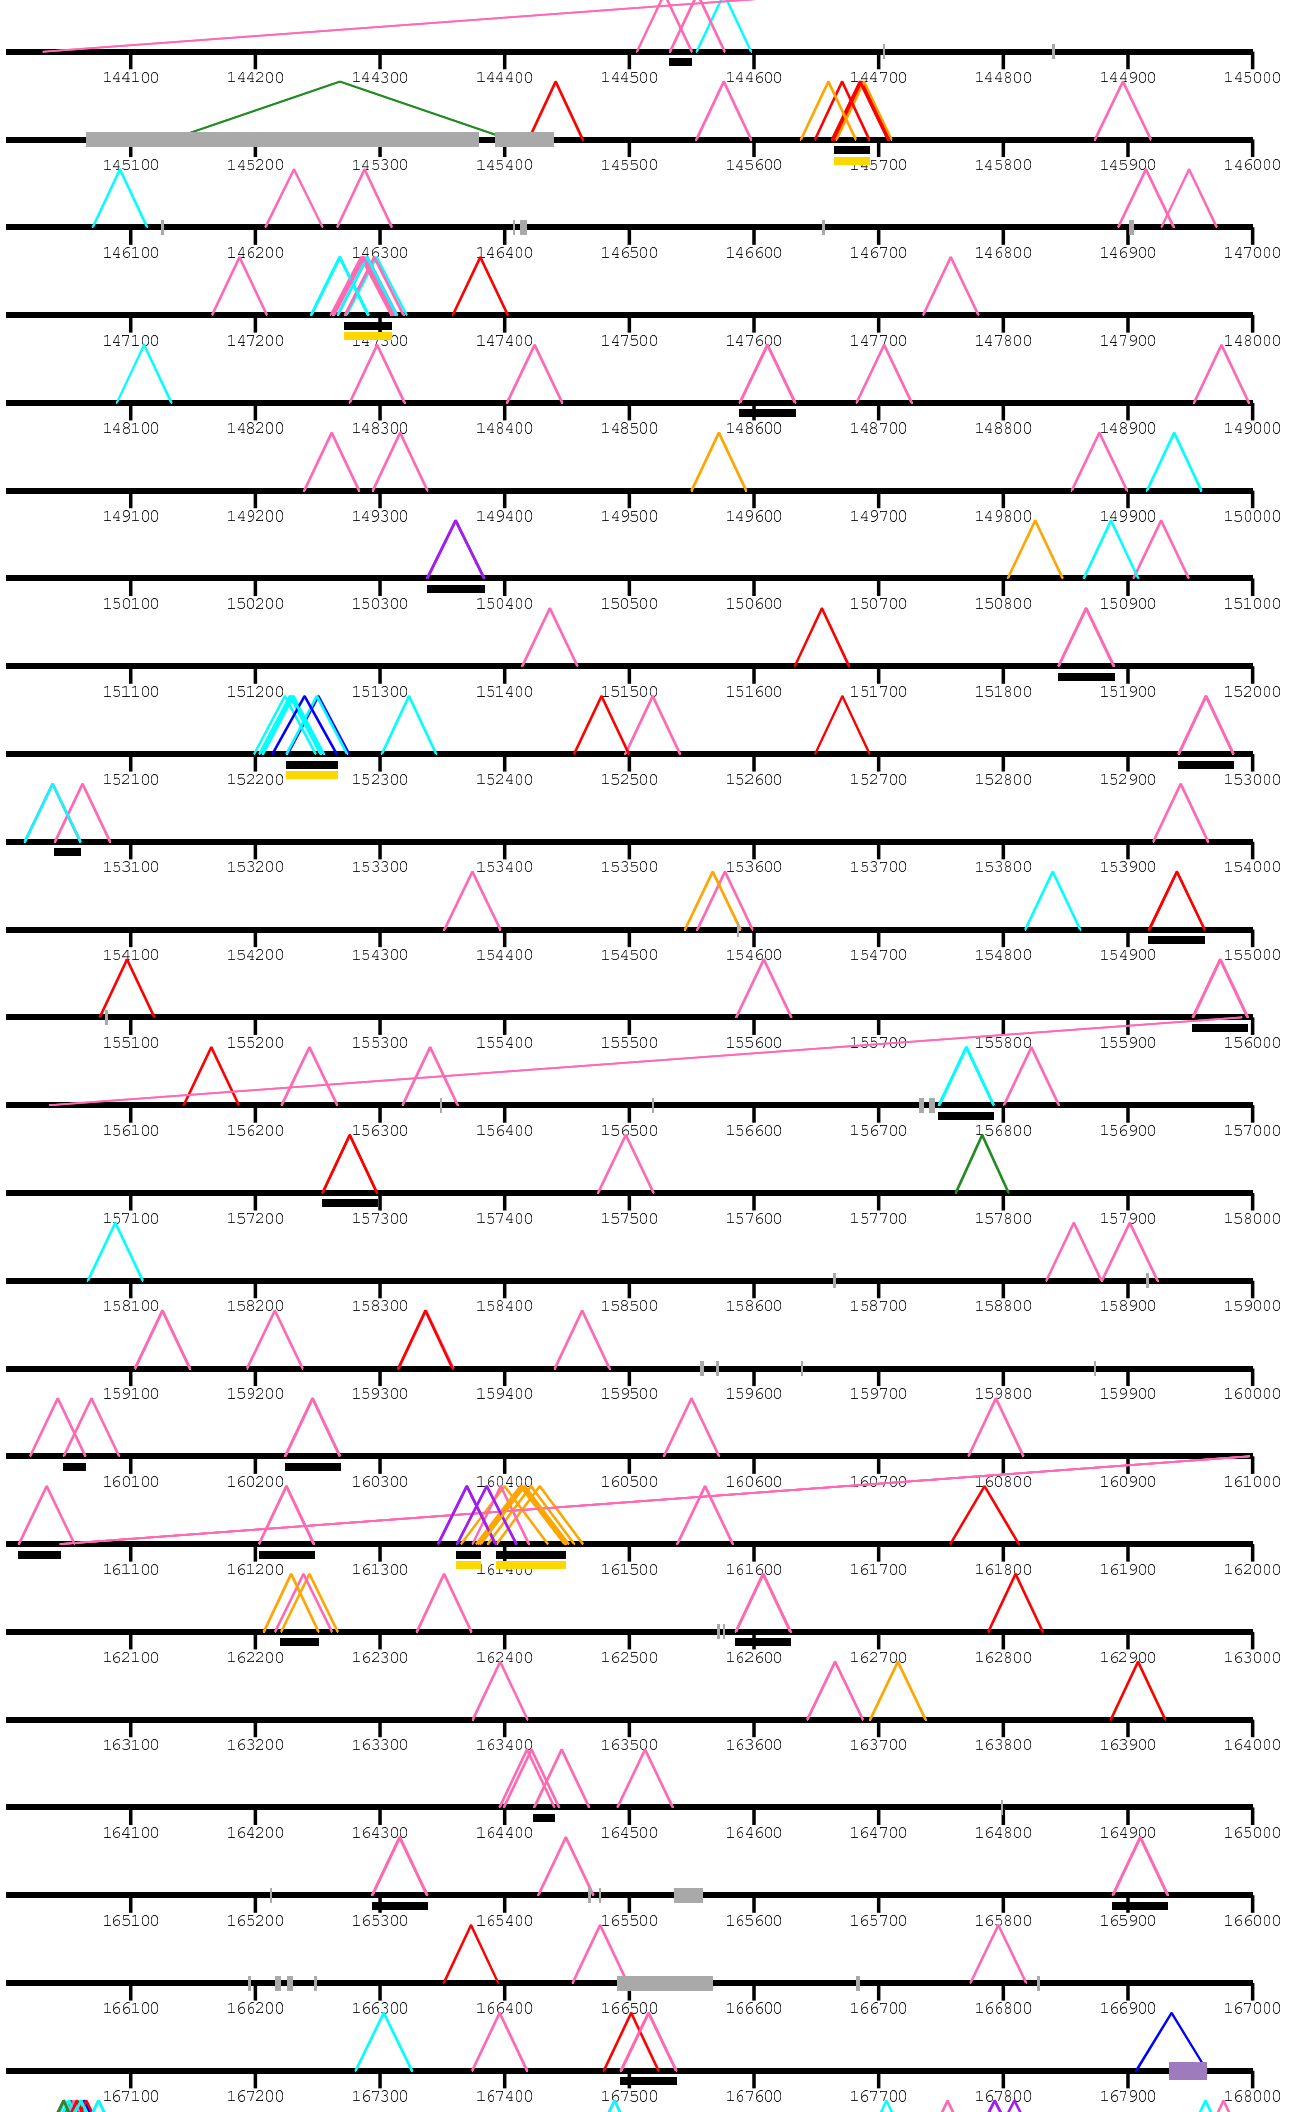

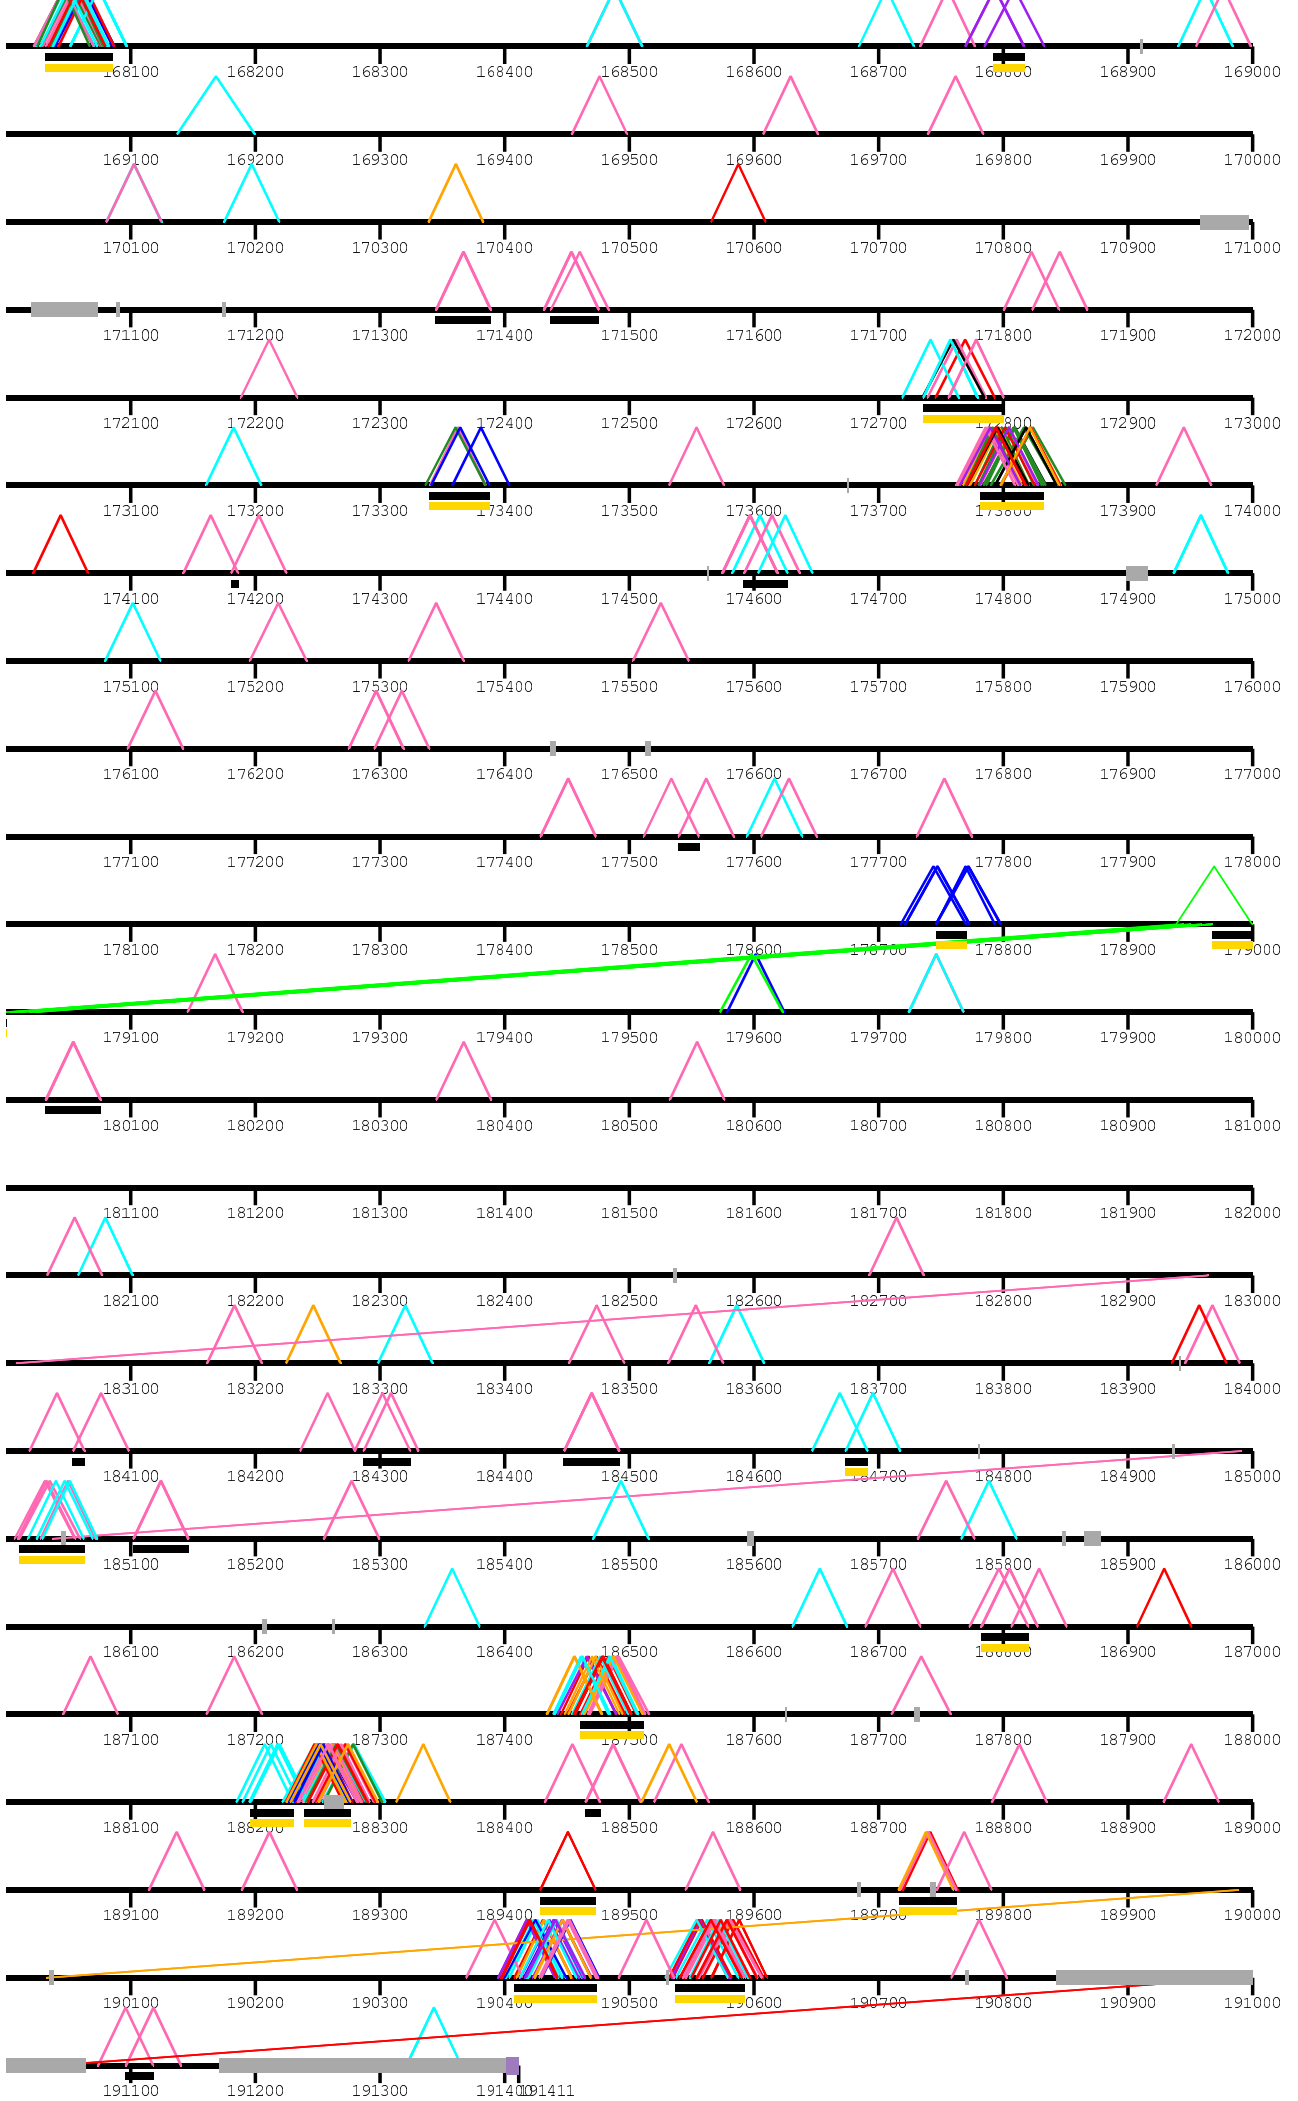

chr5

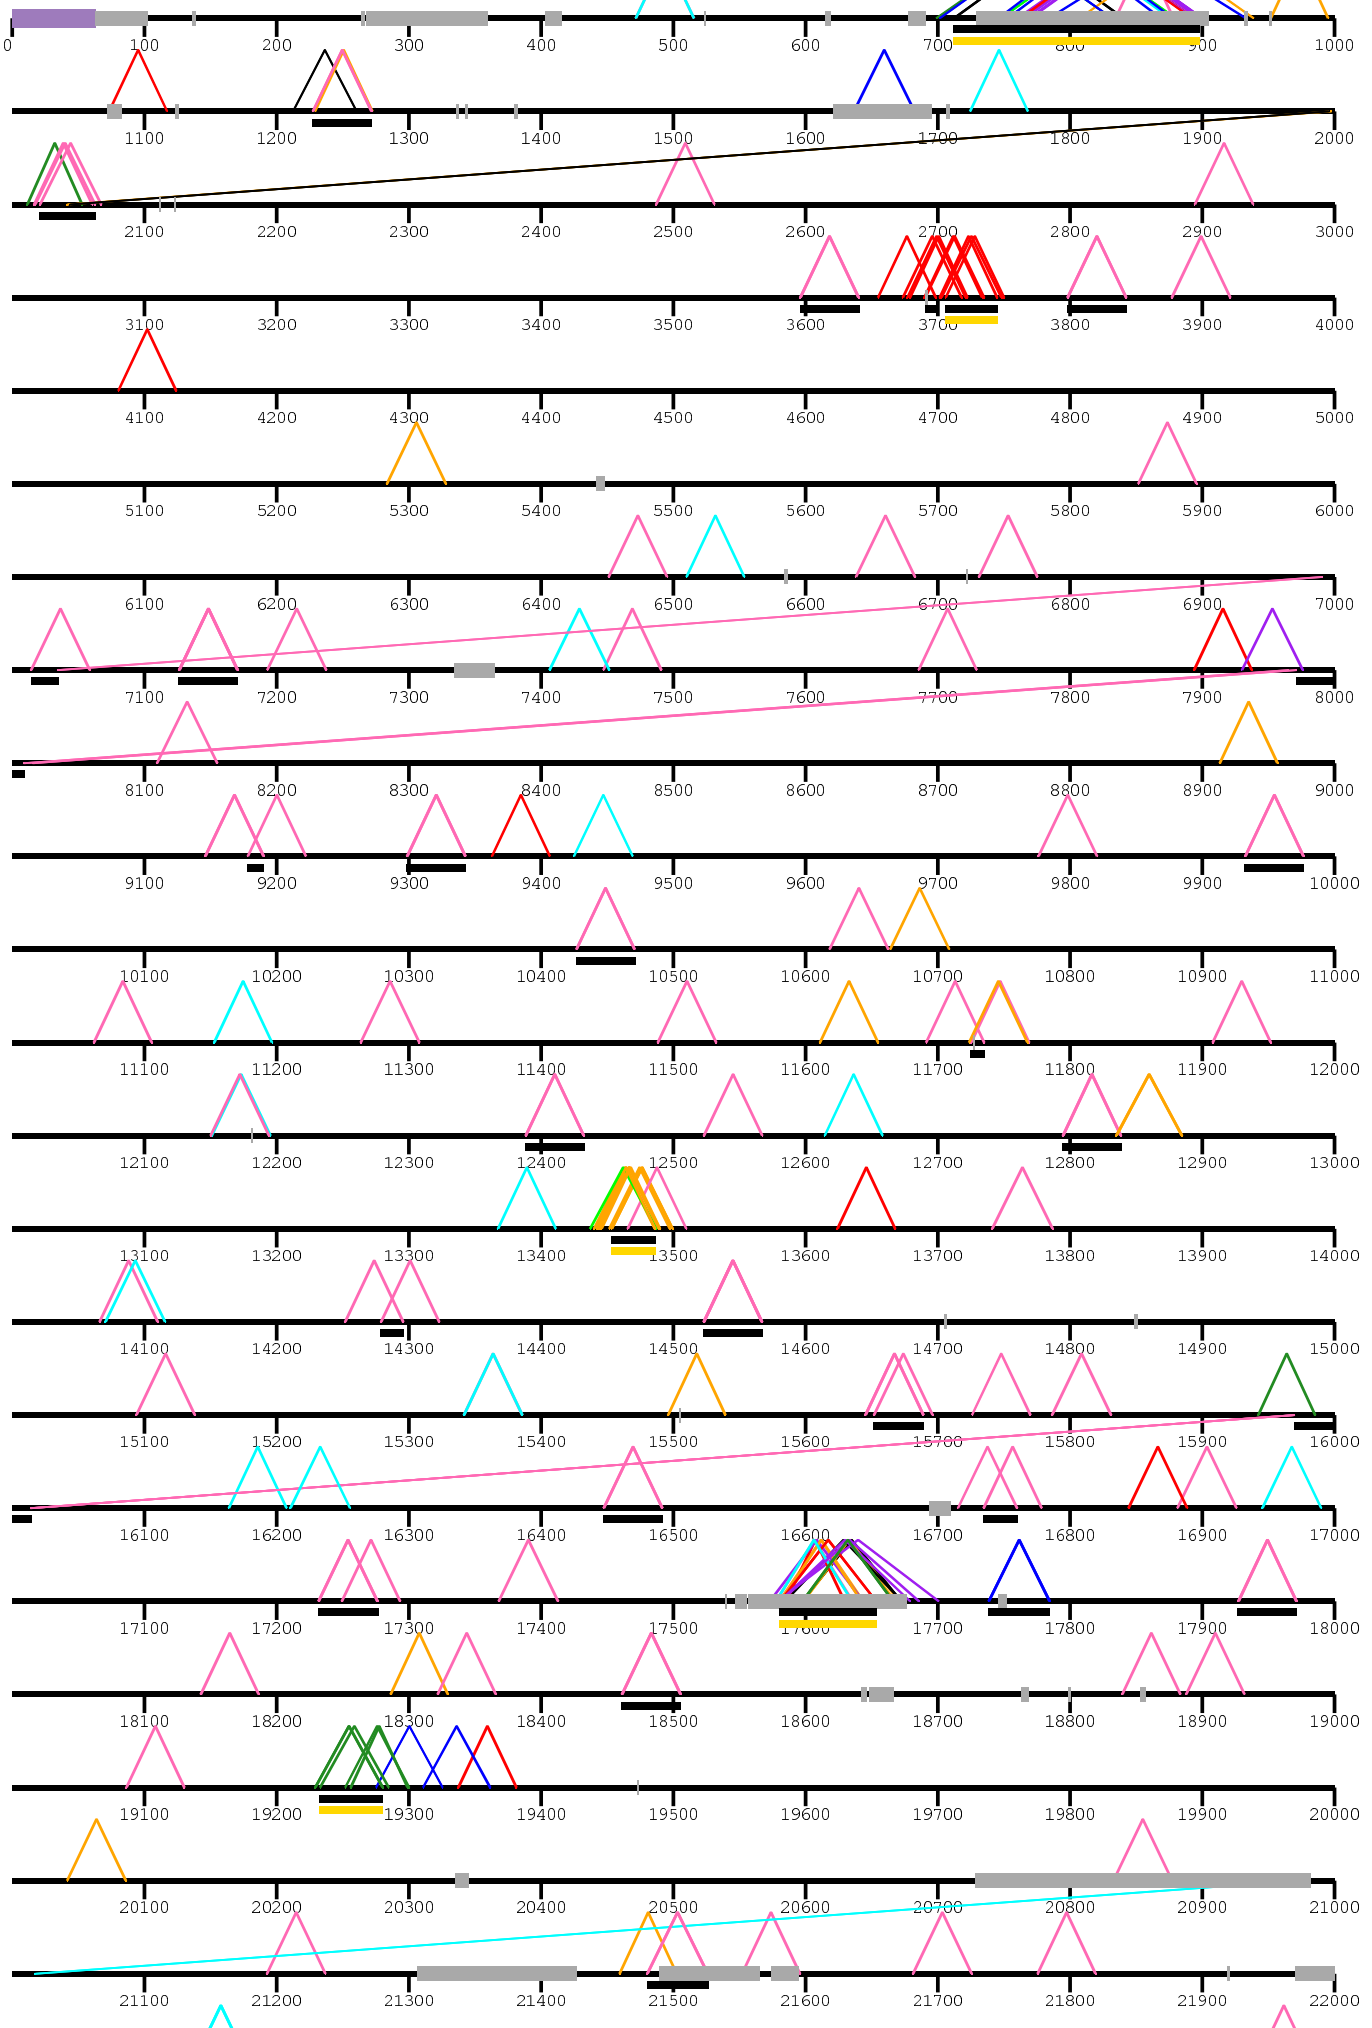

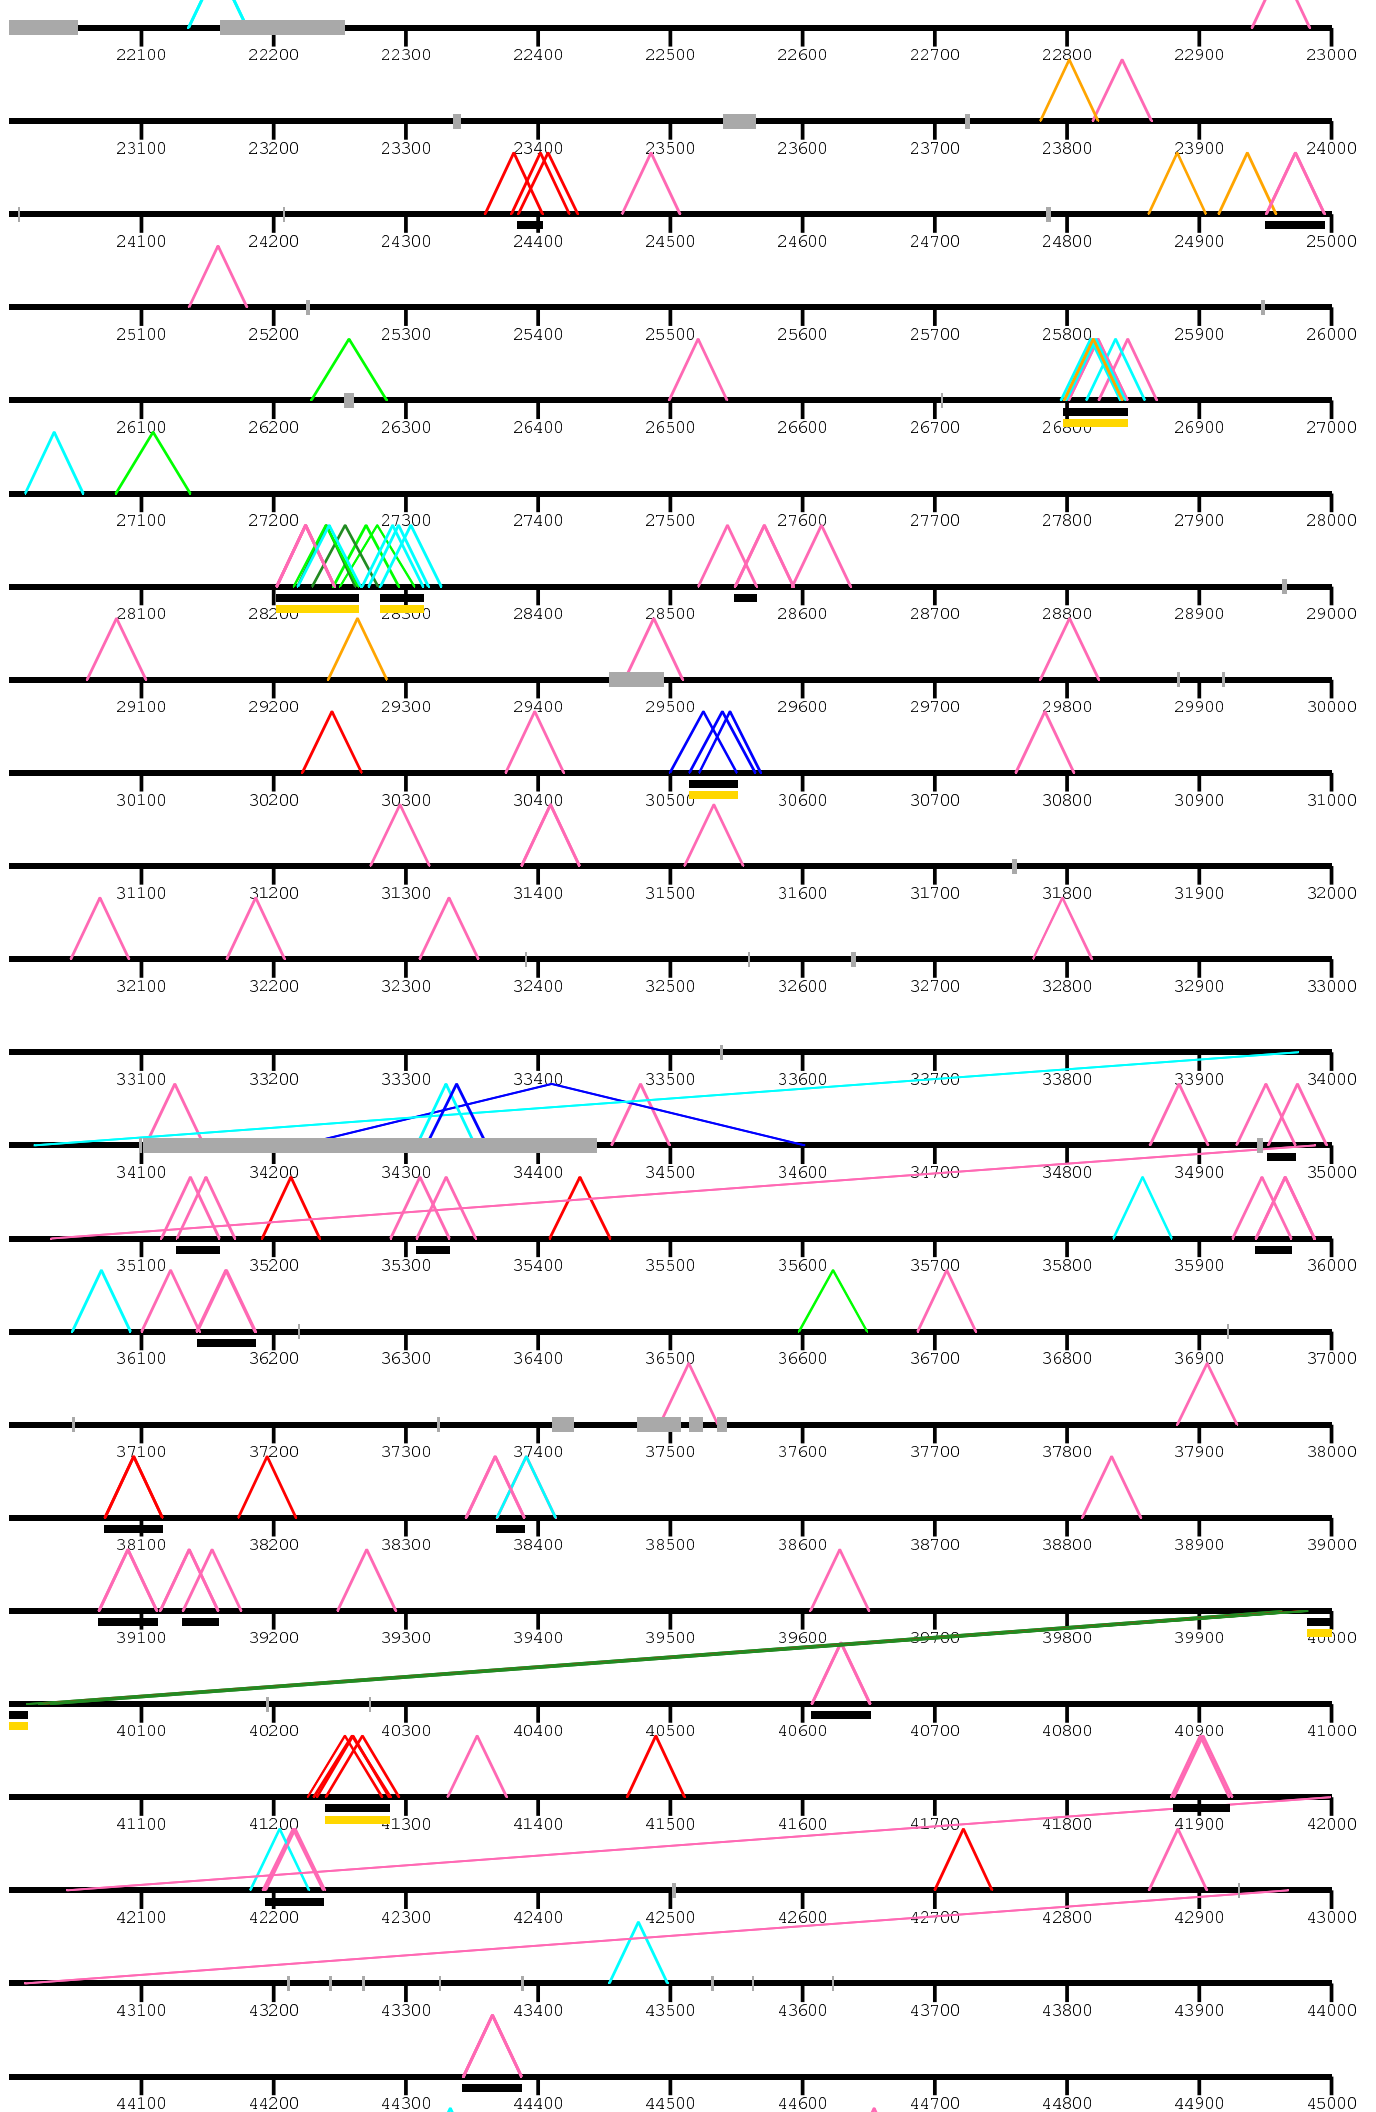

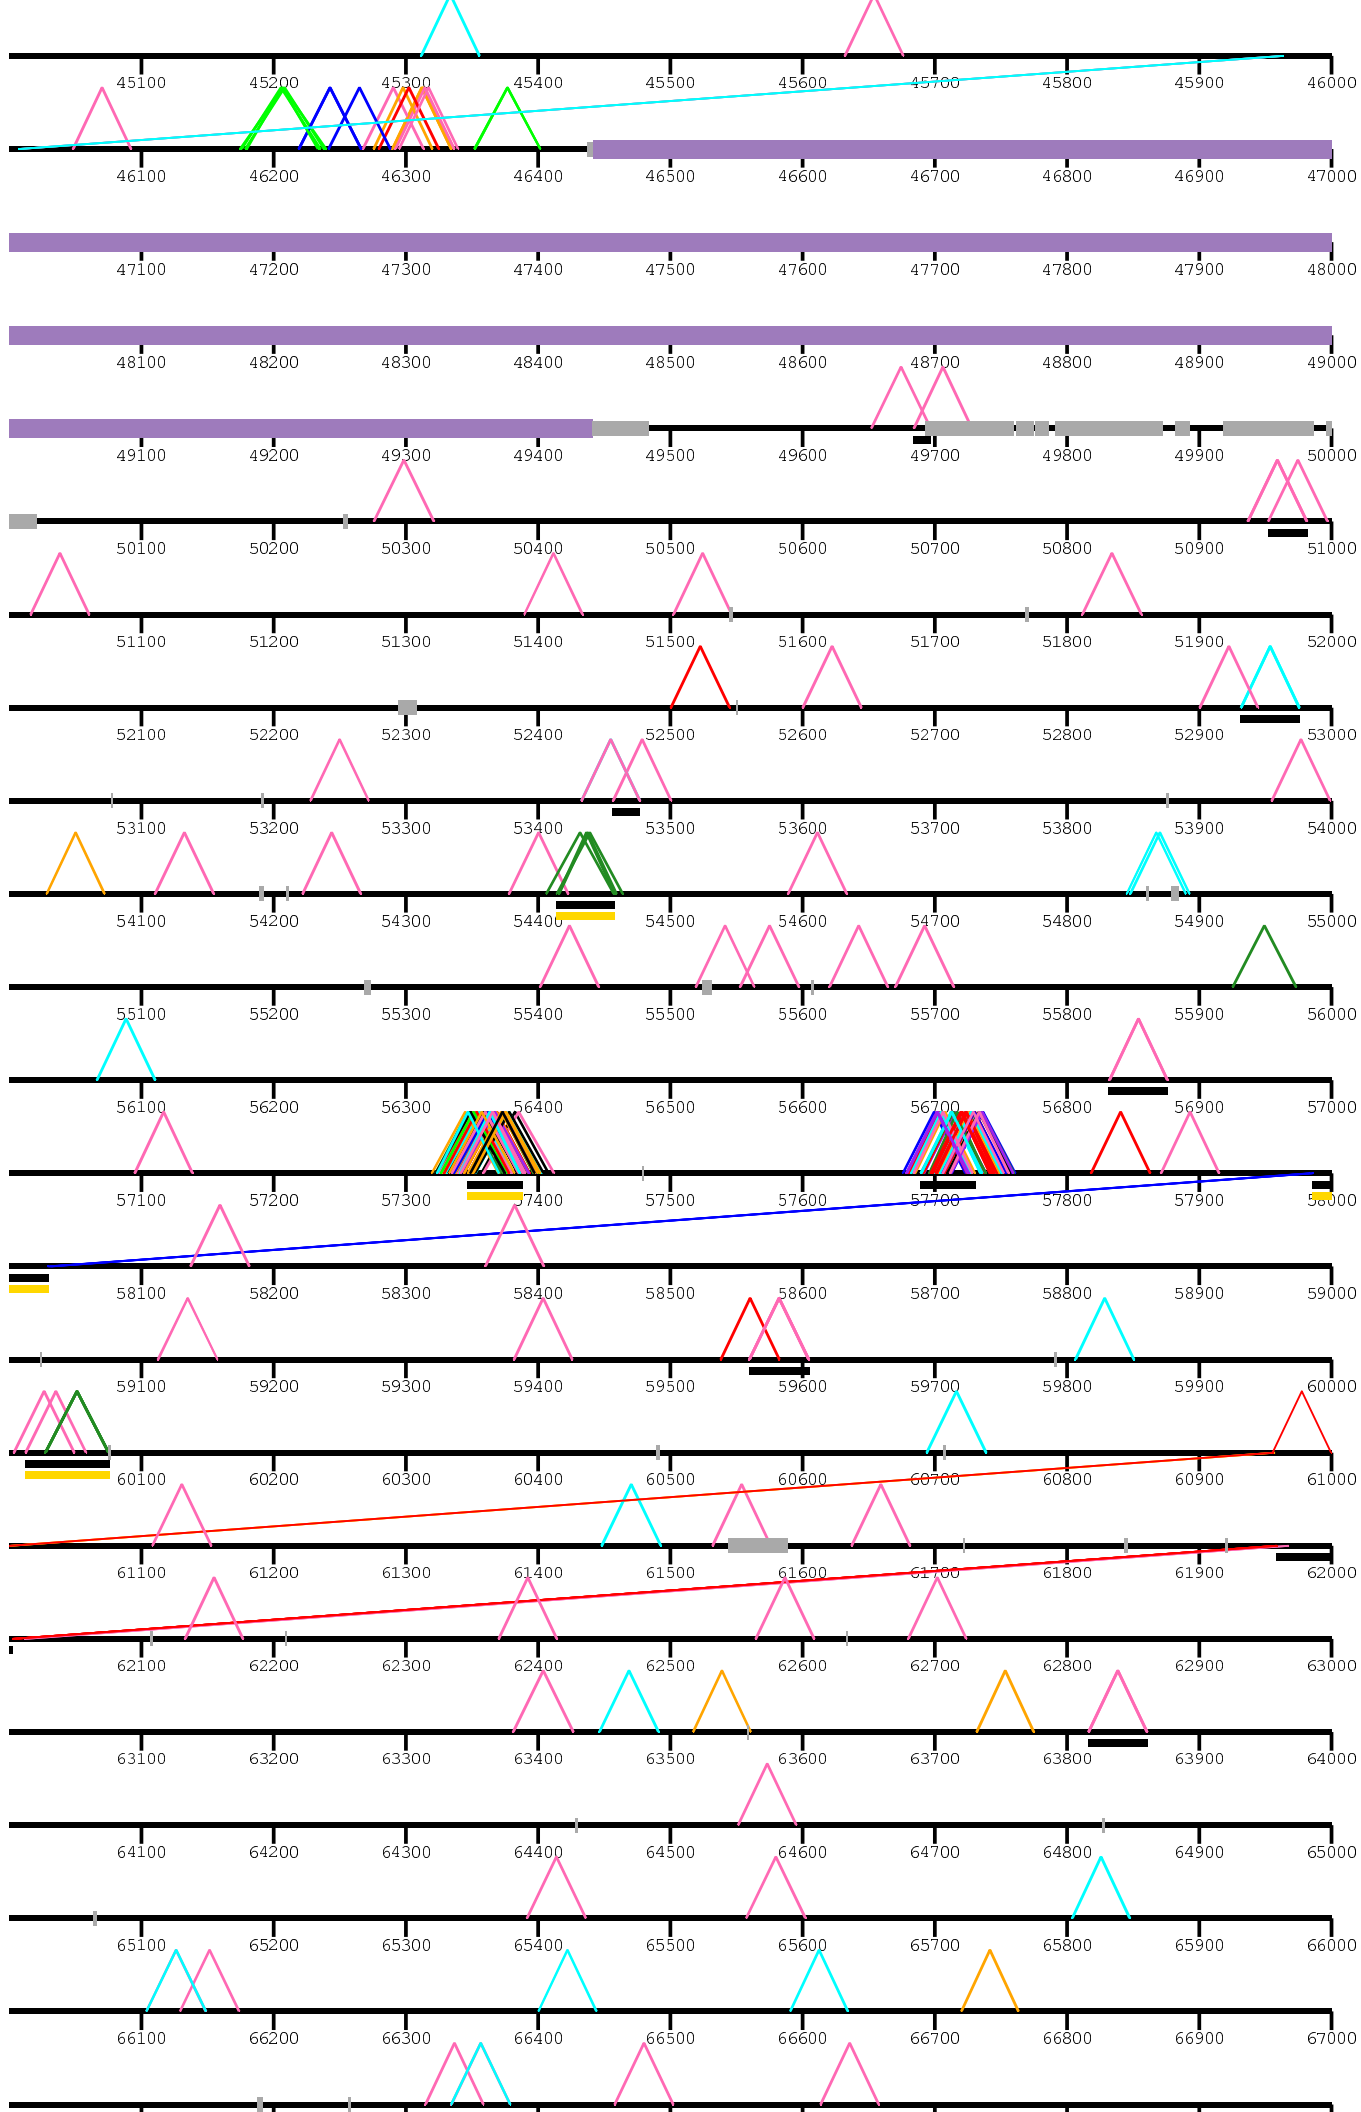



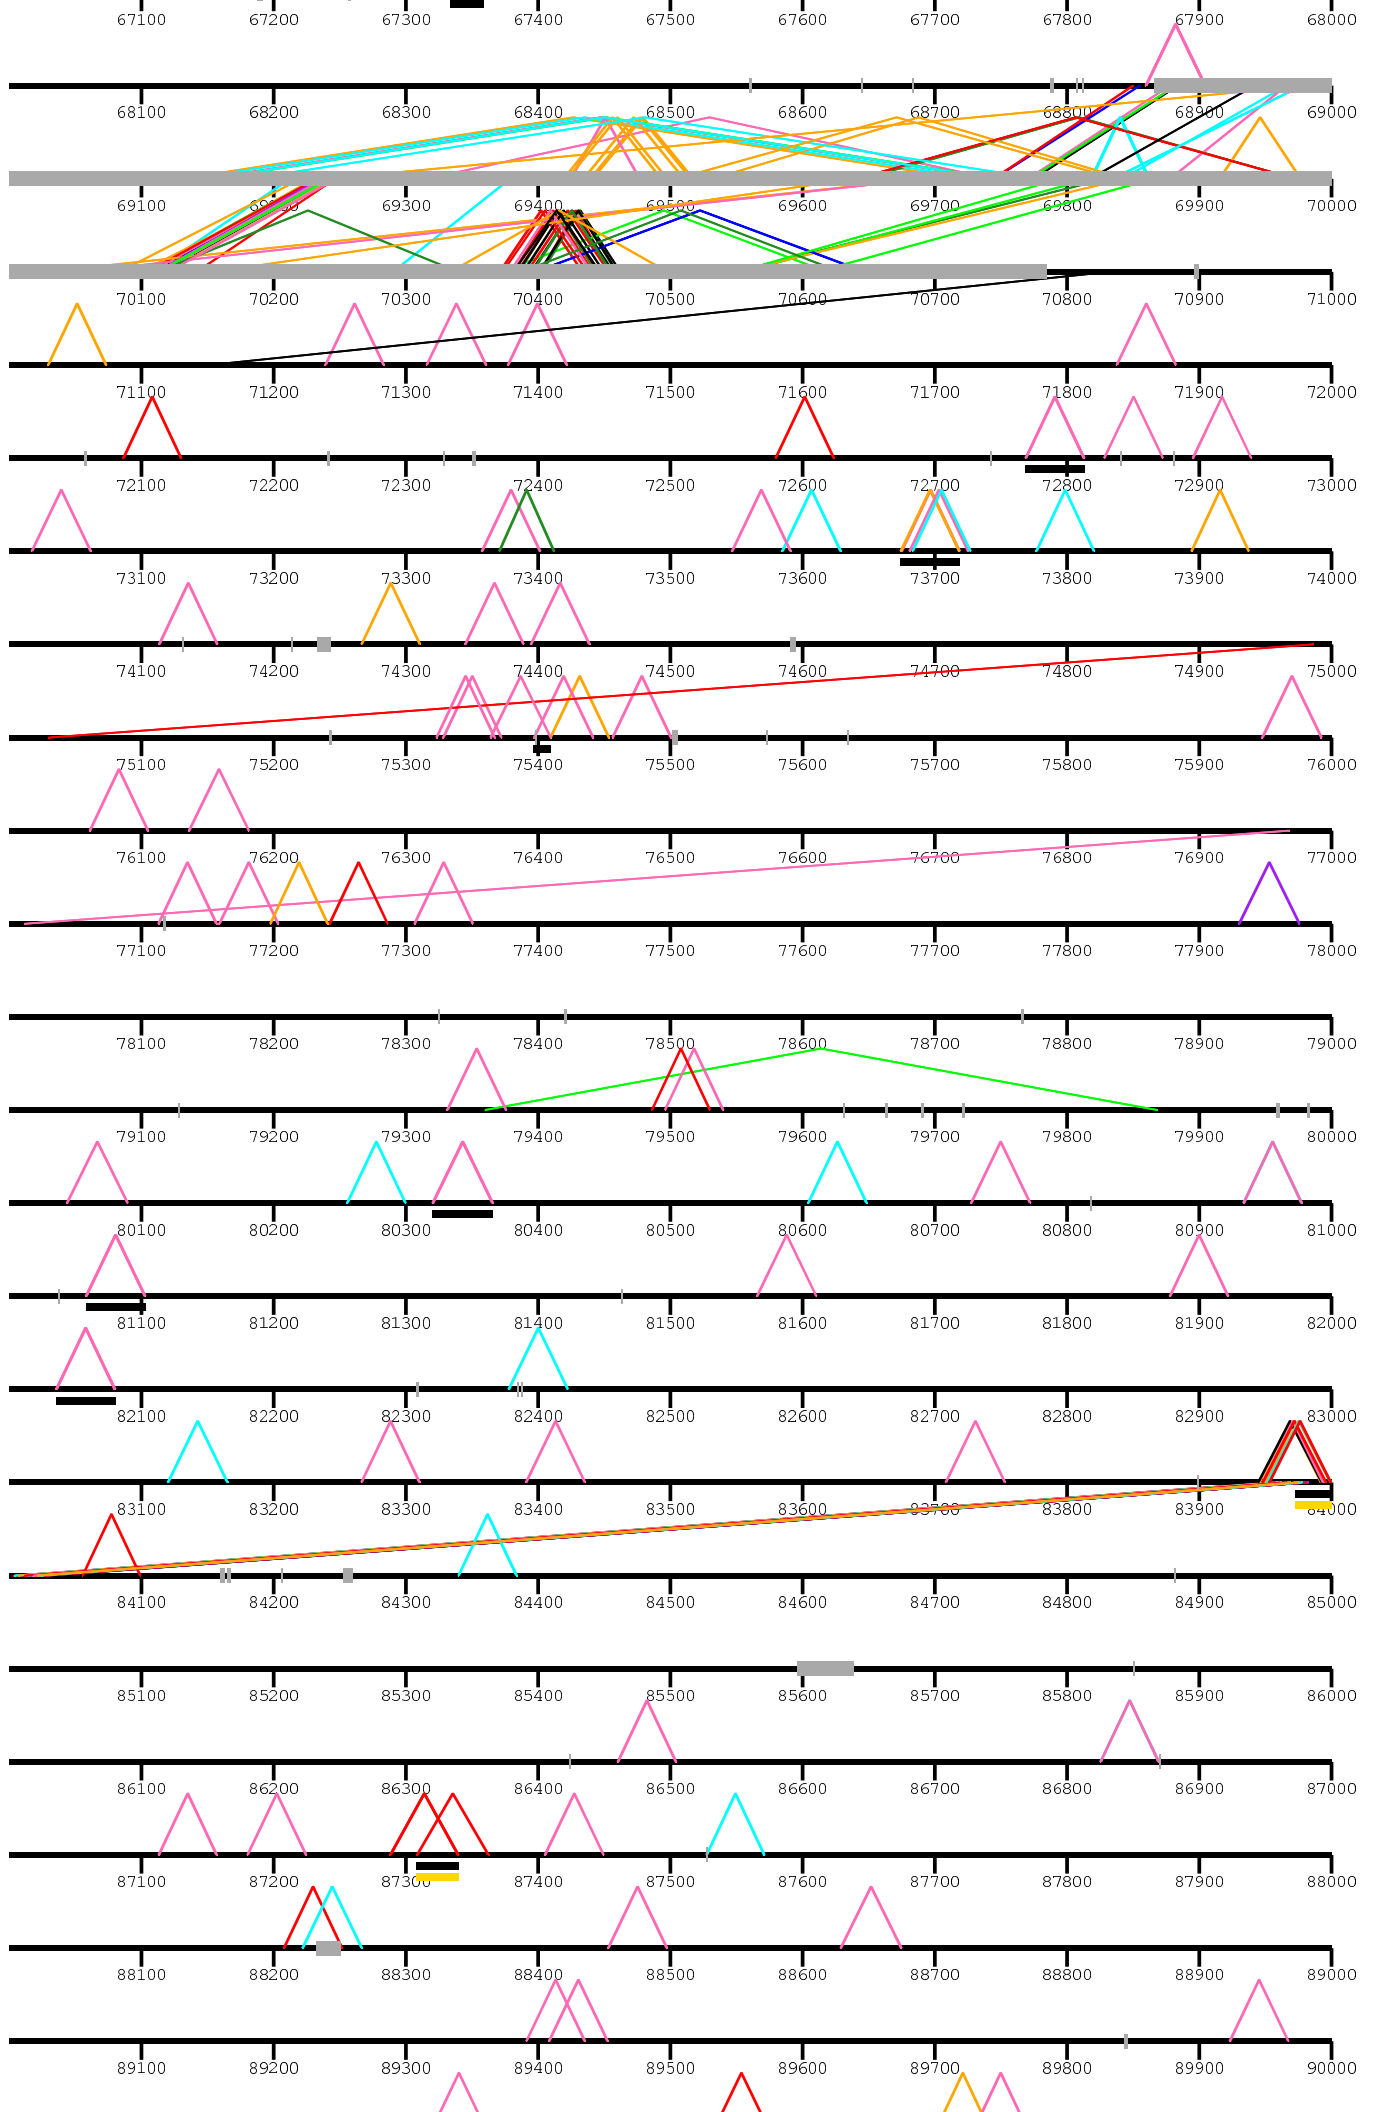

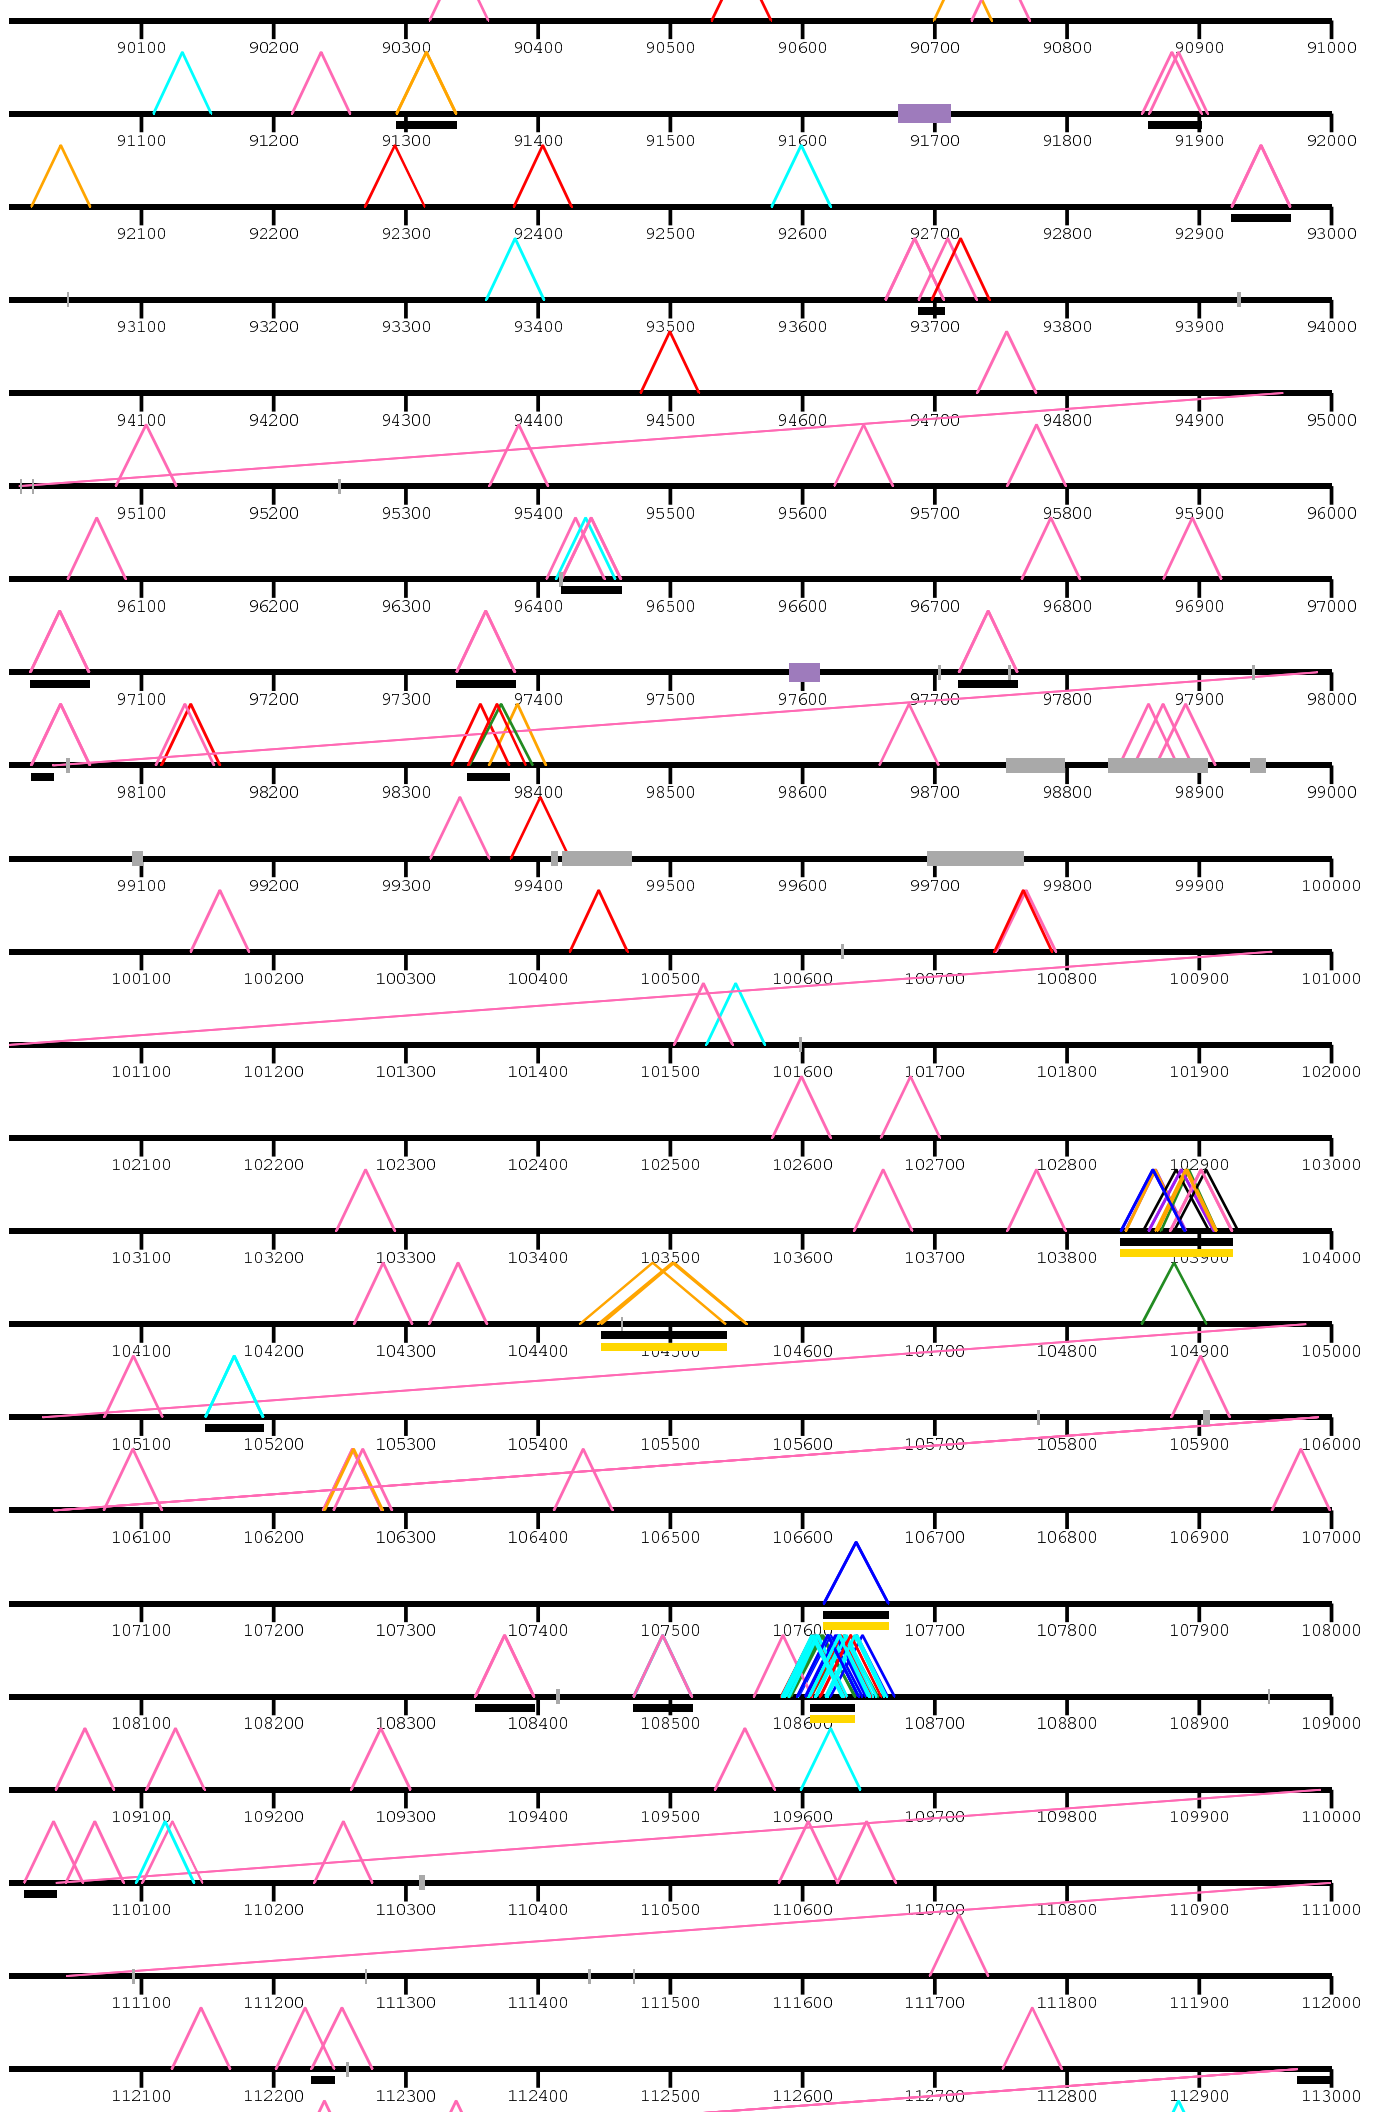

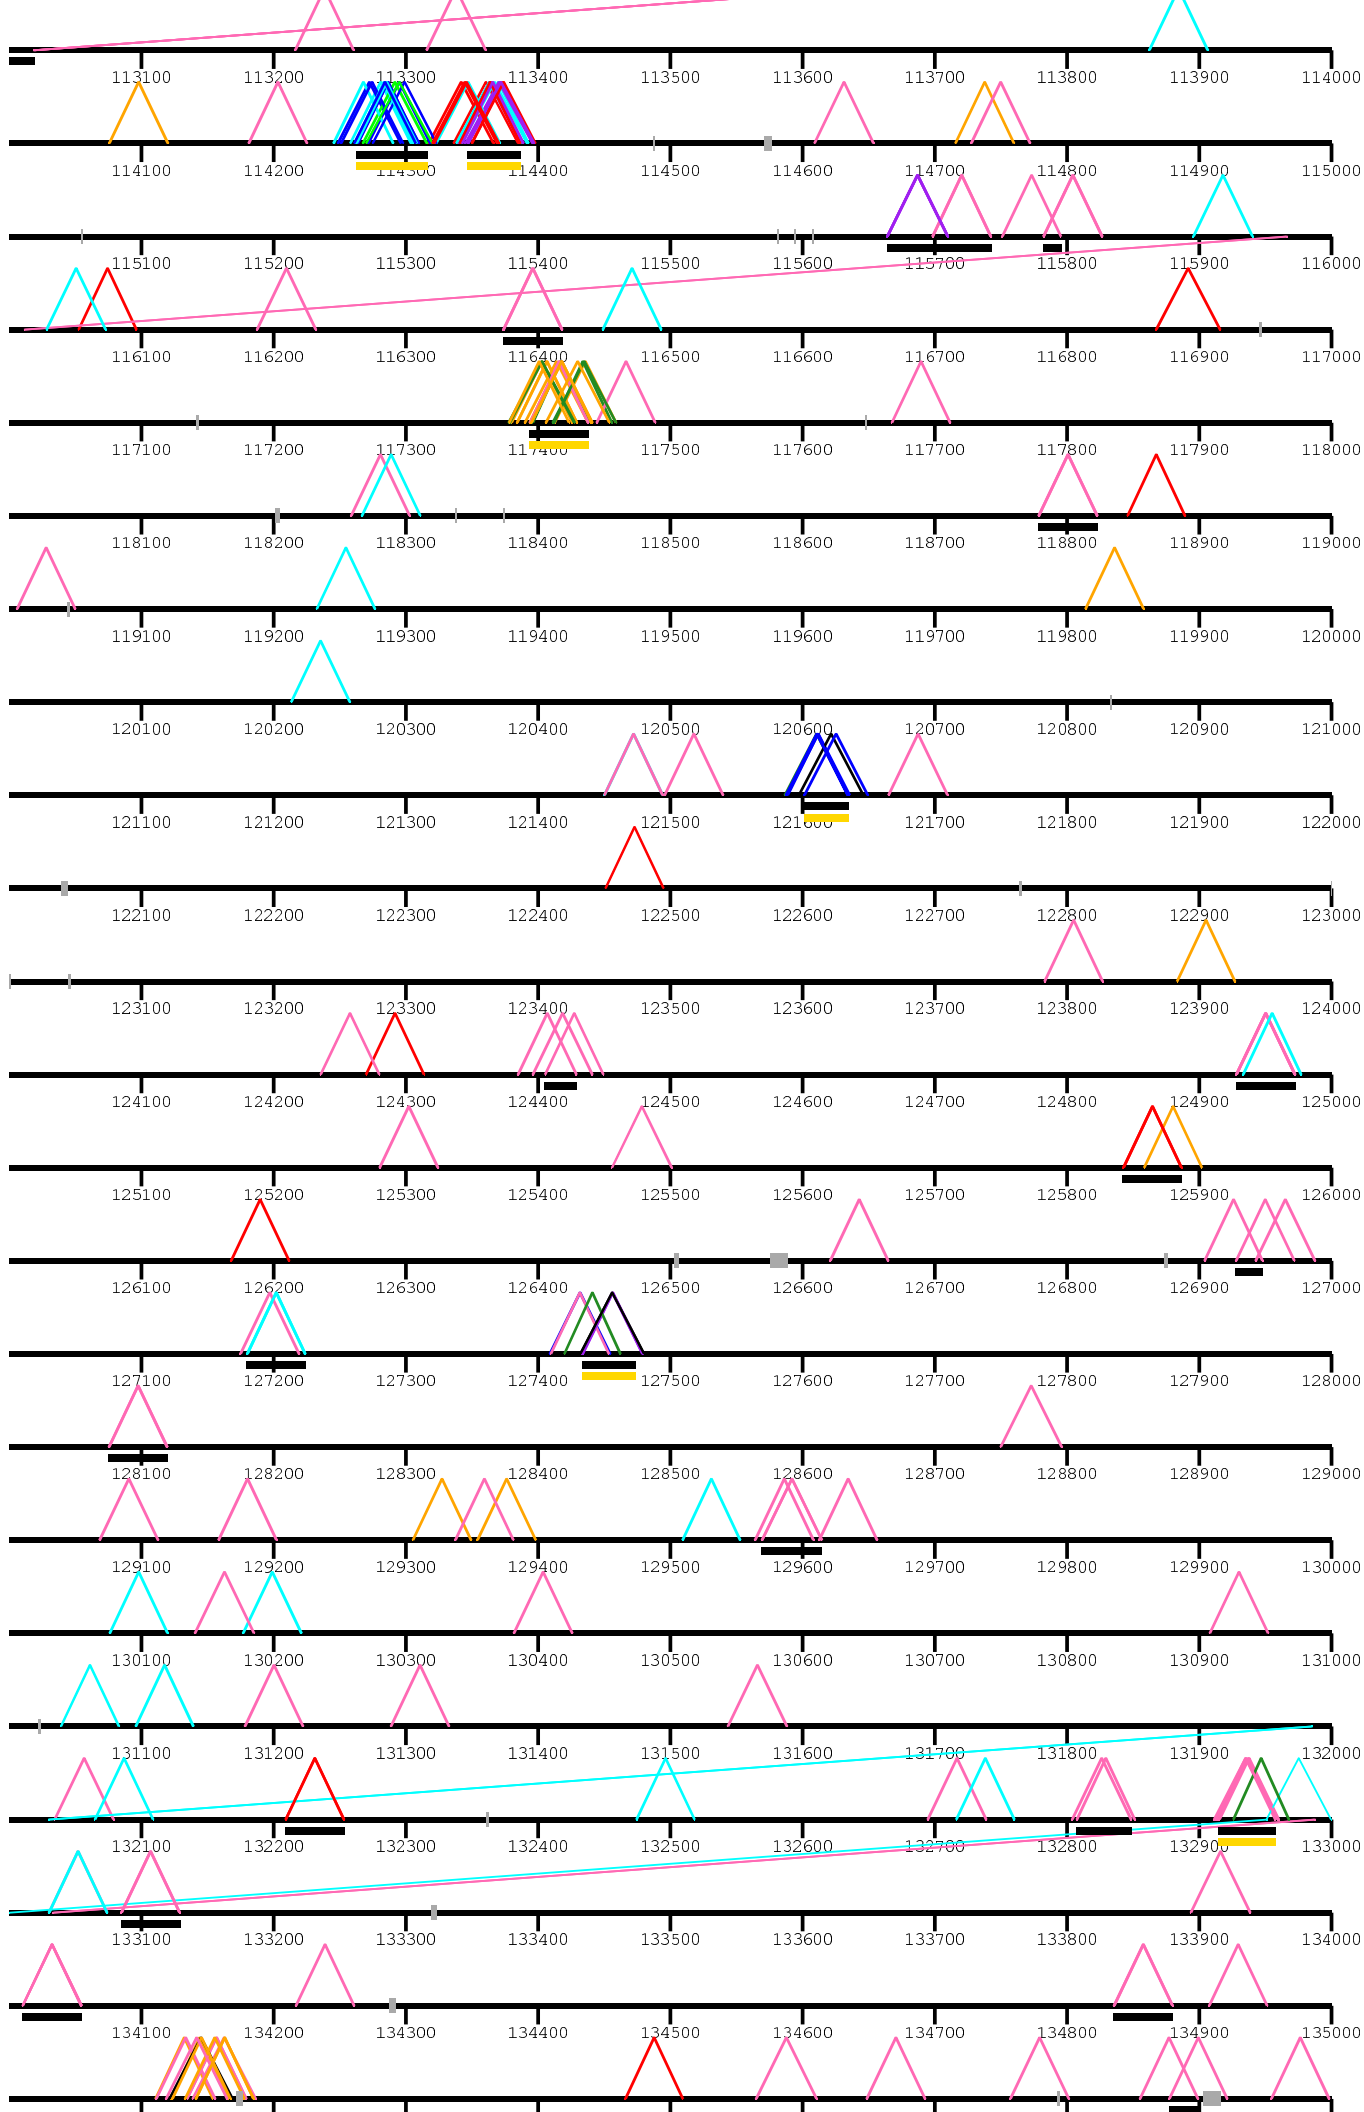

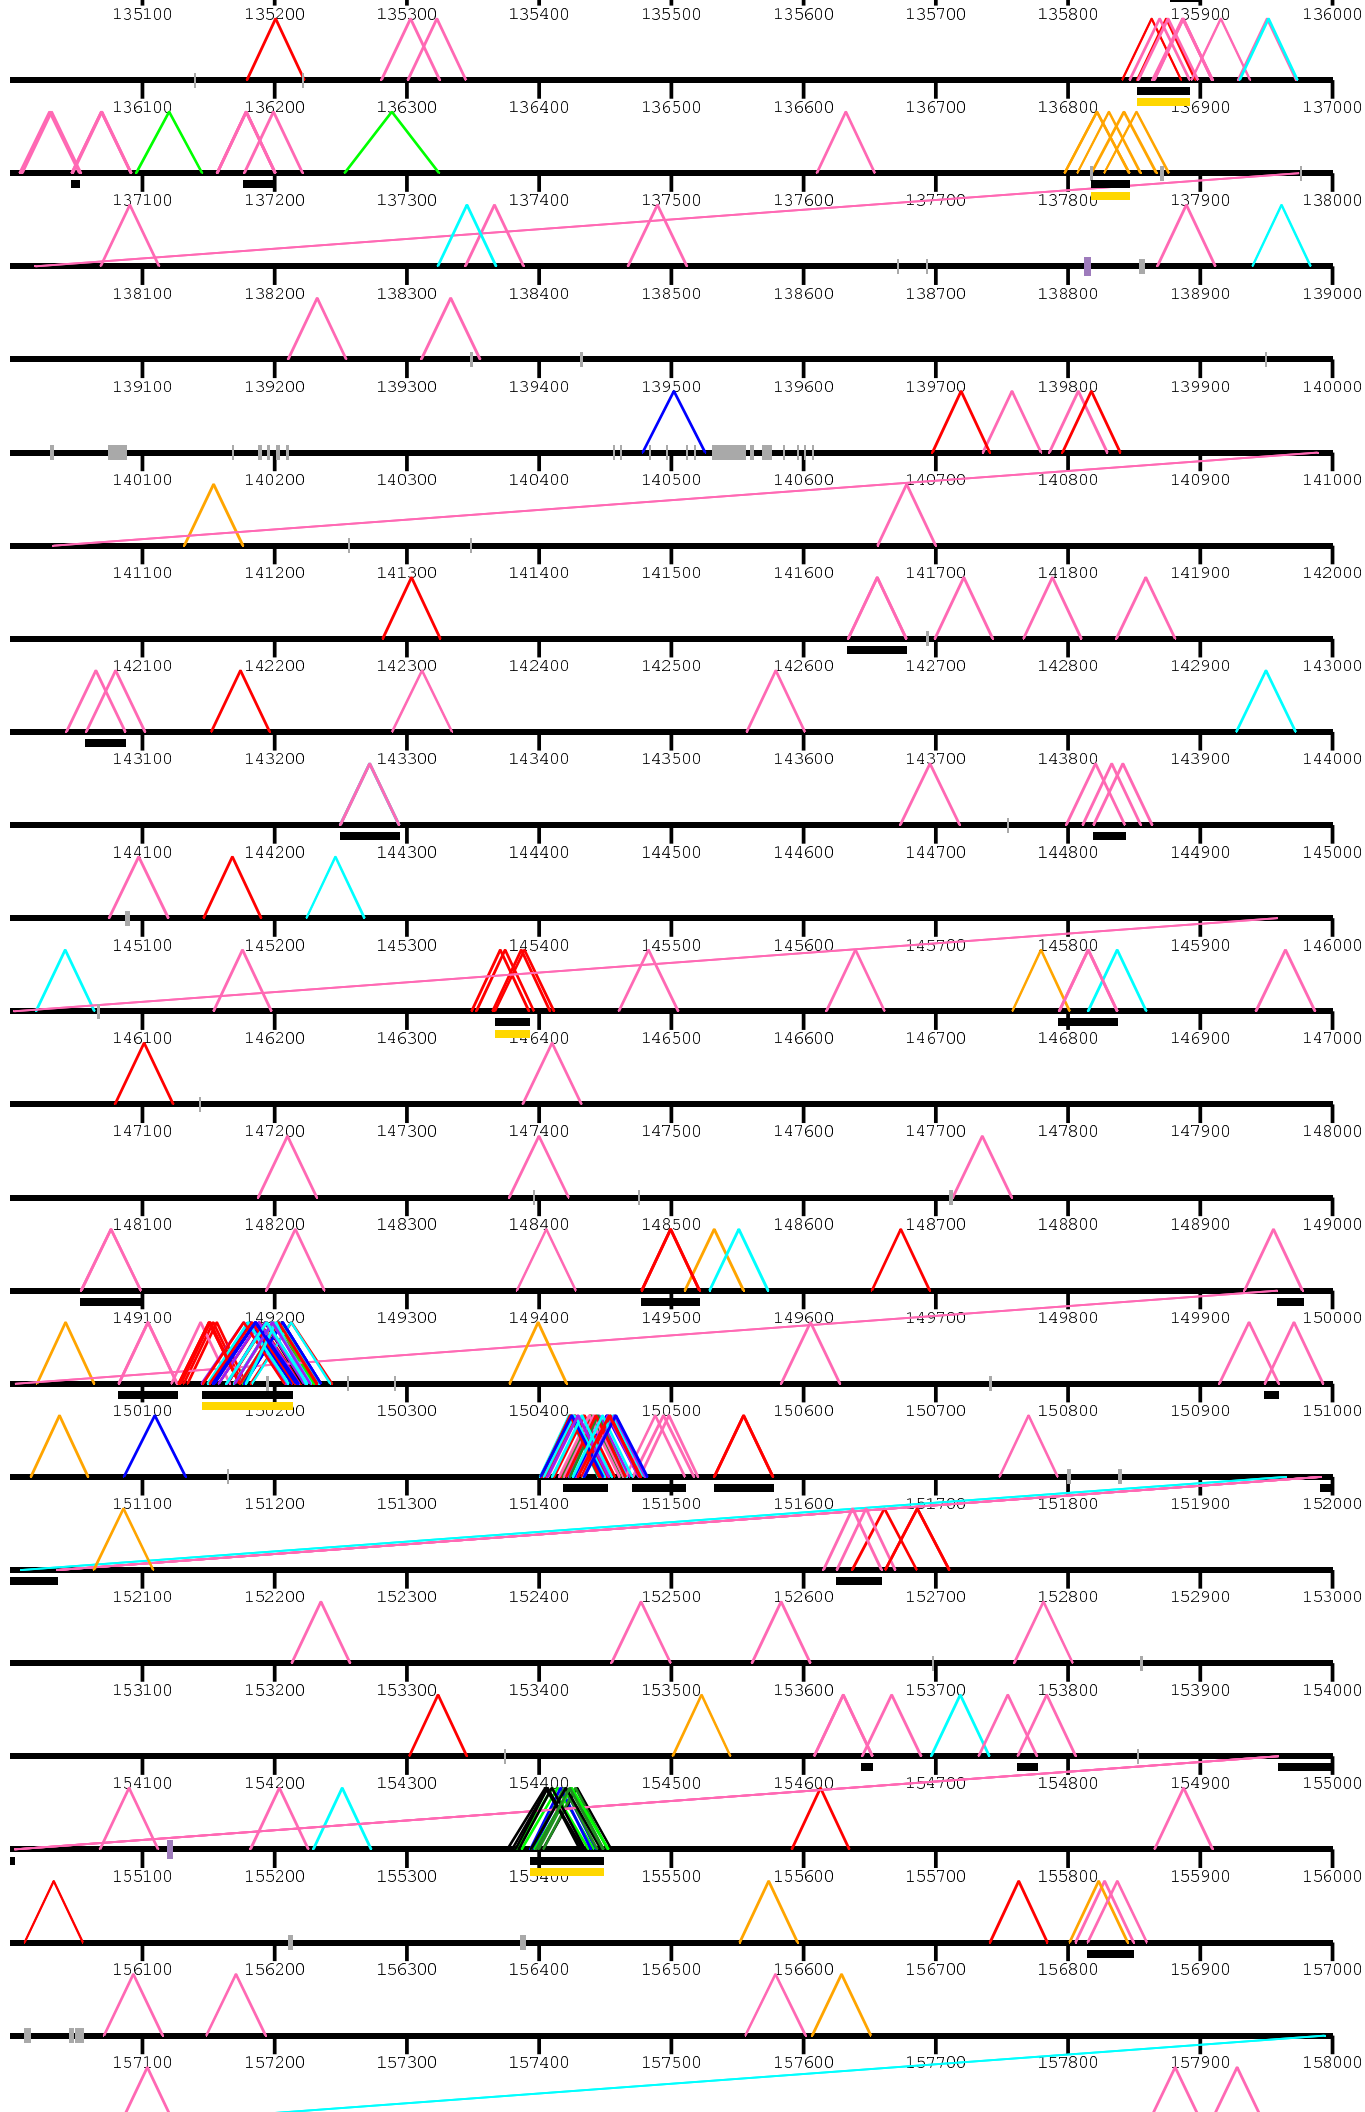

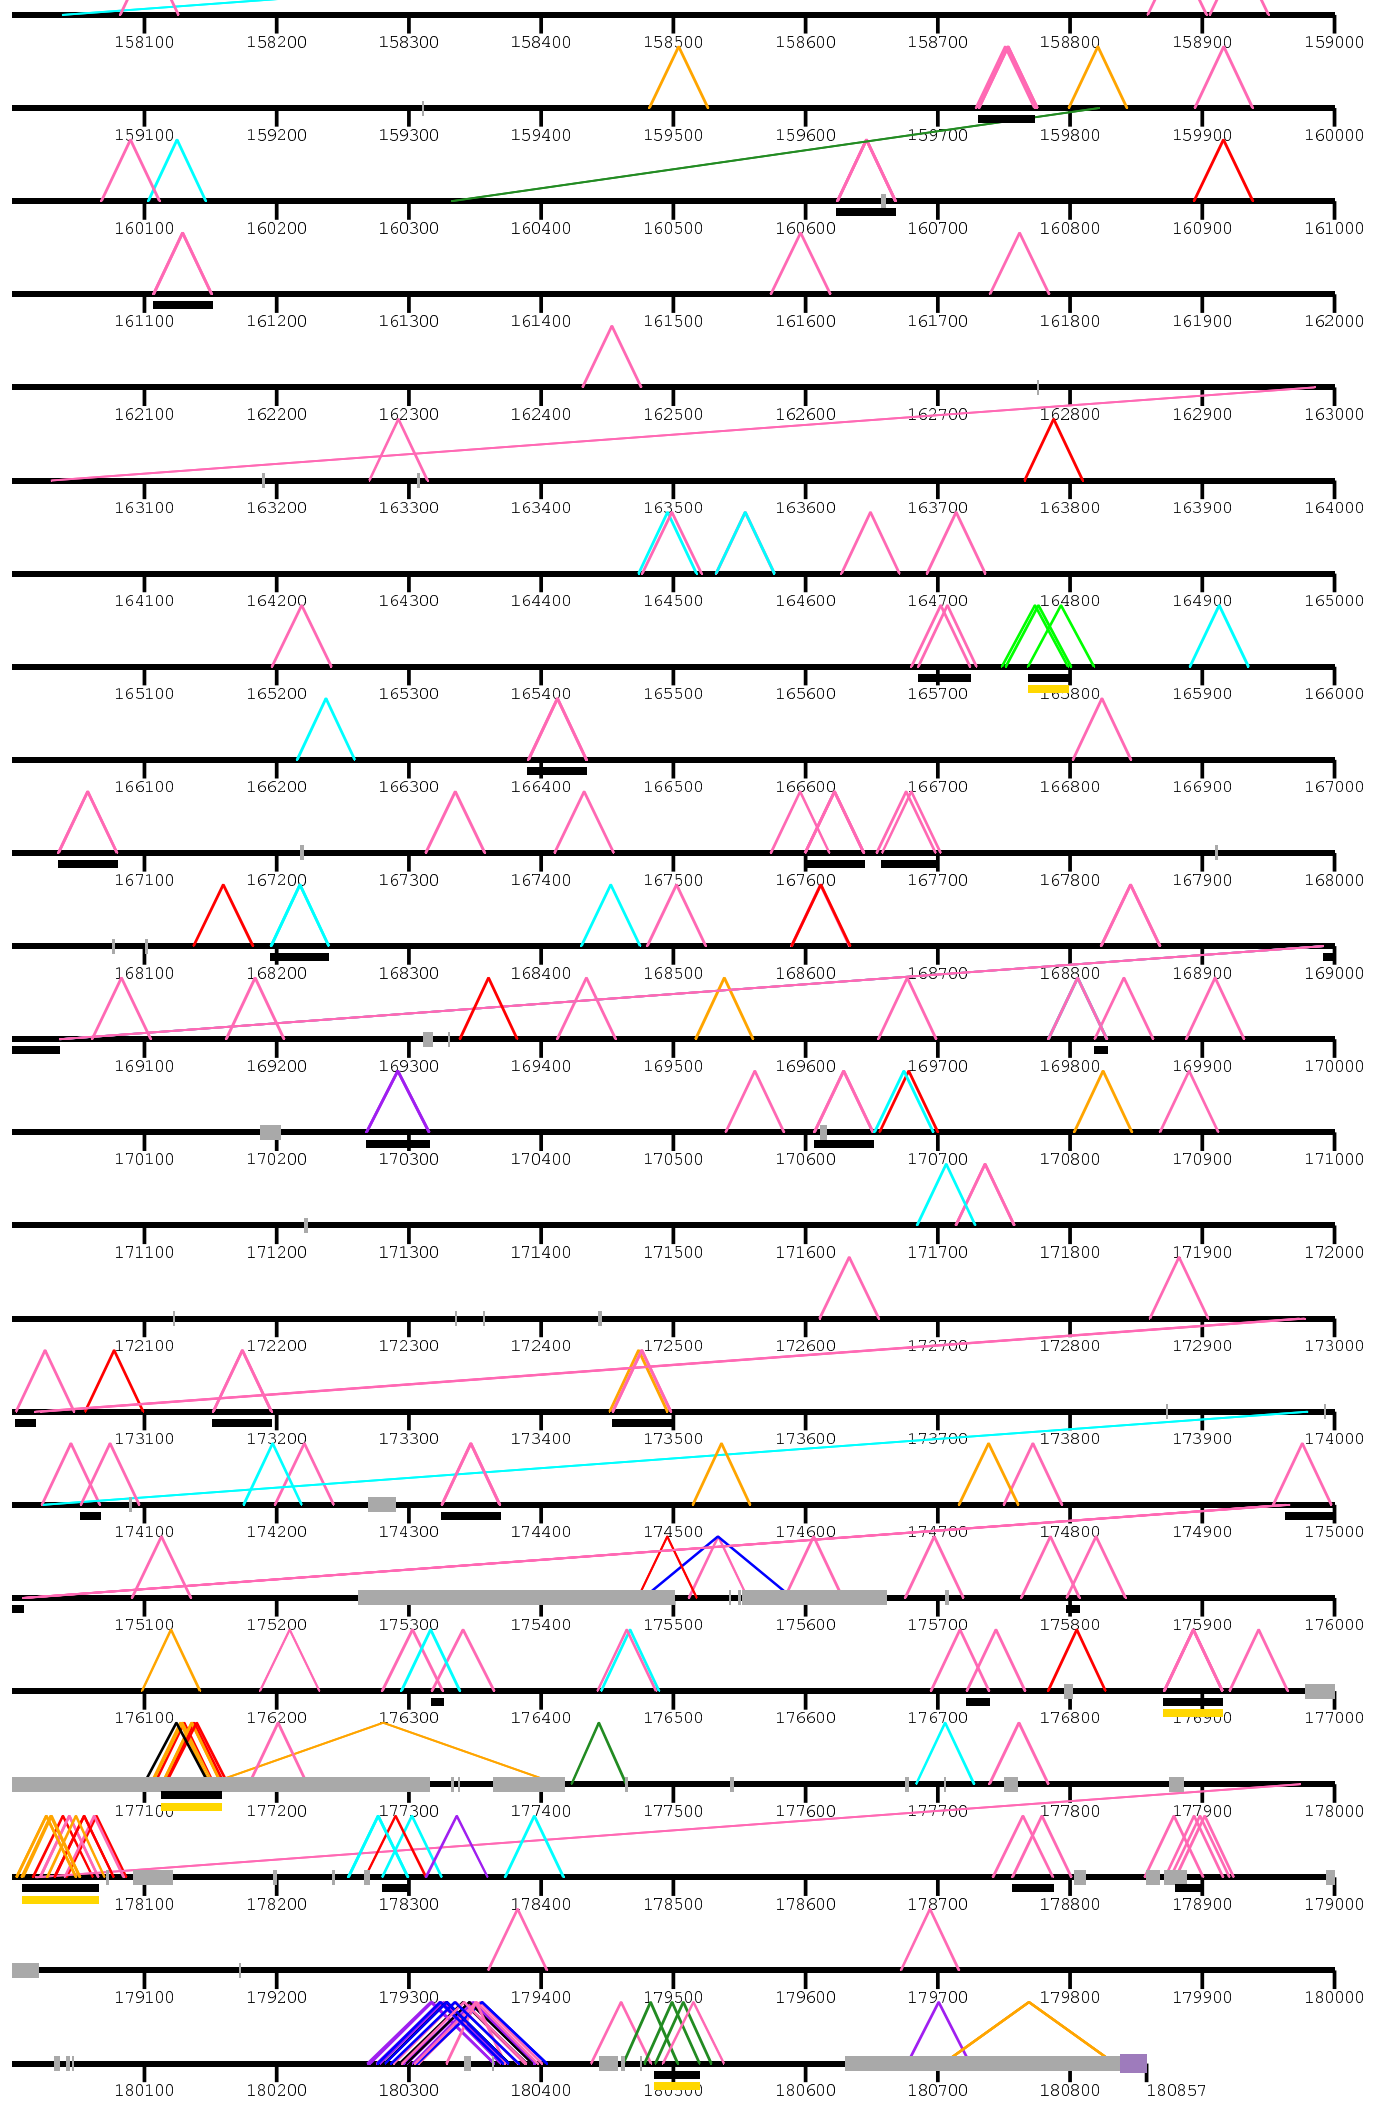

chr6

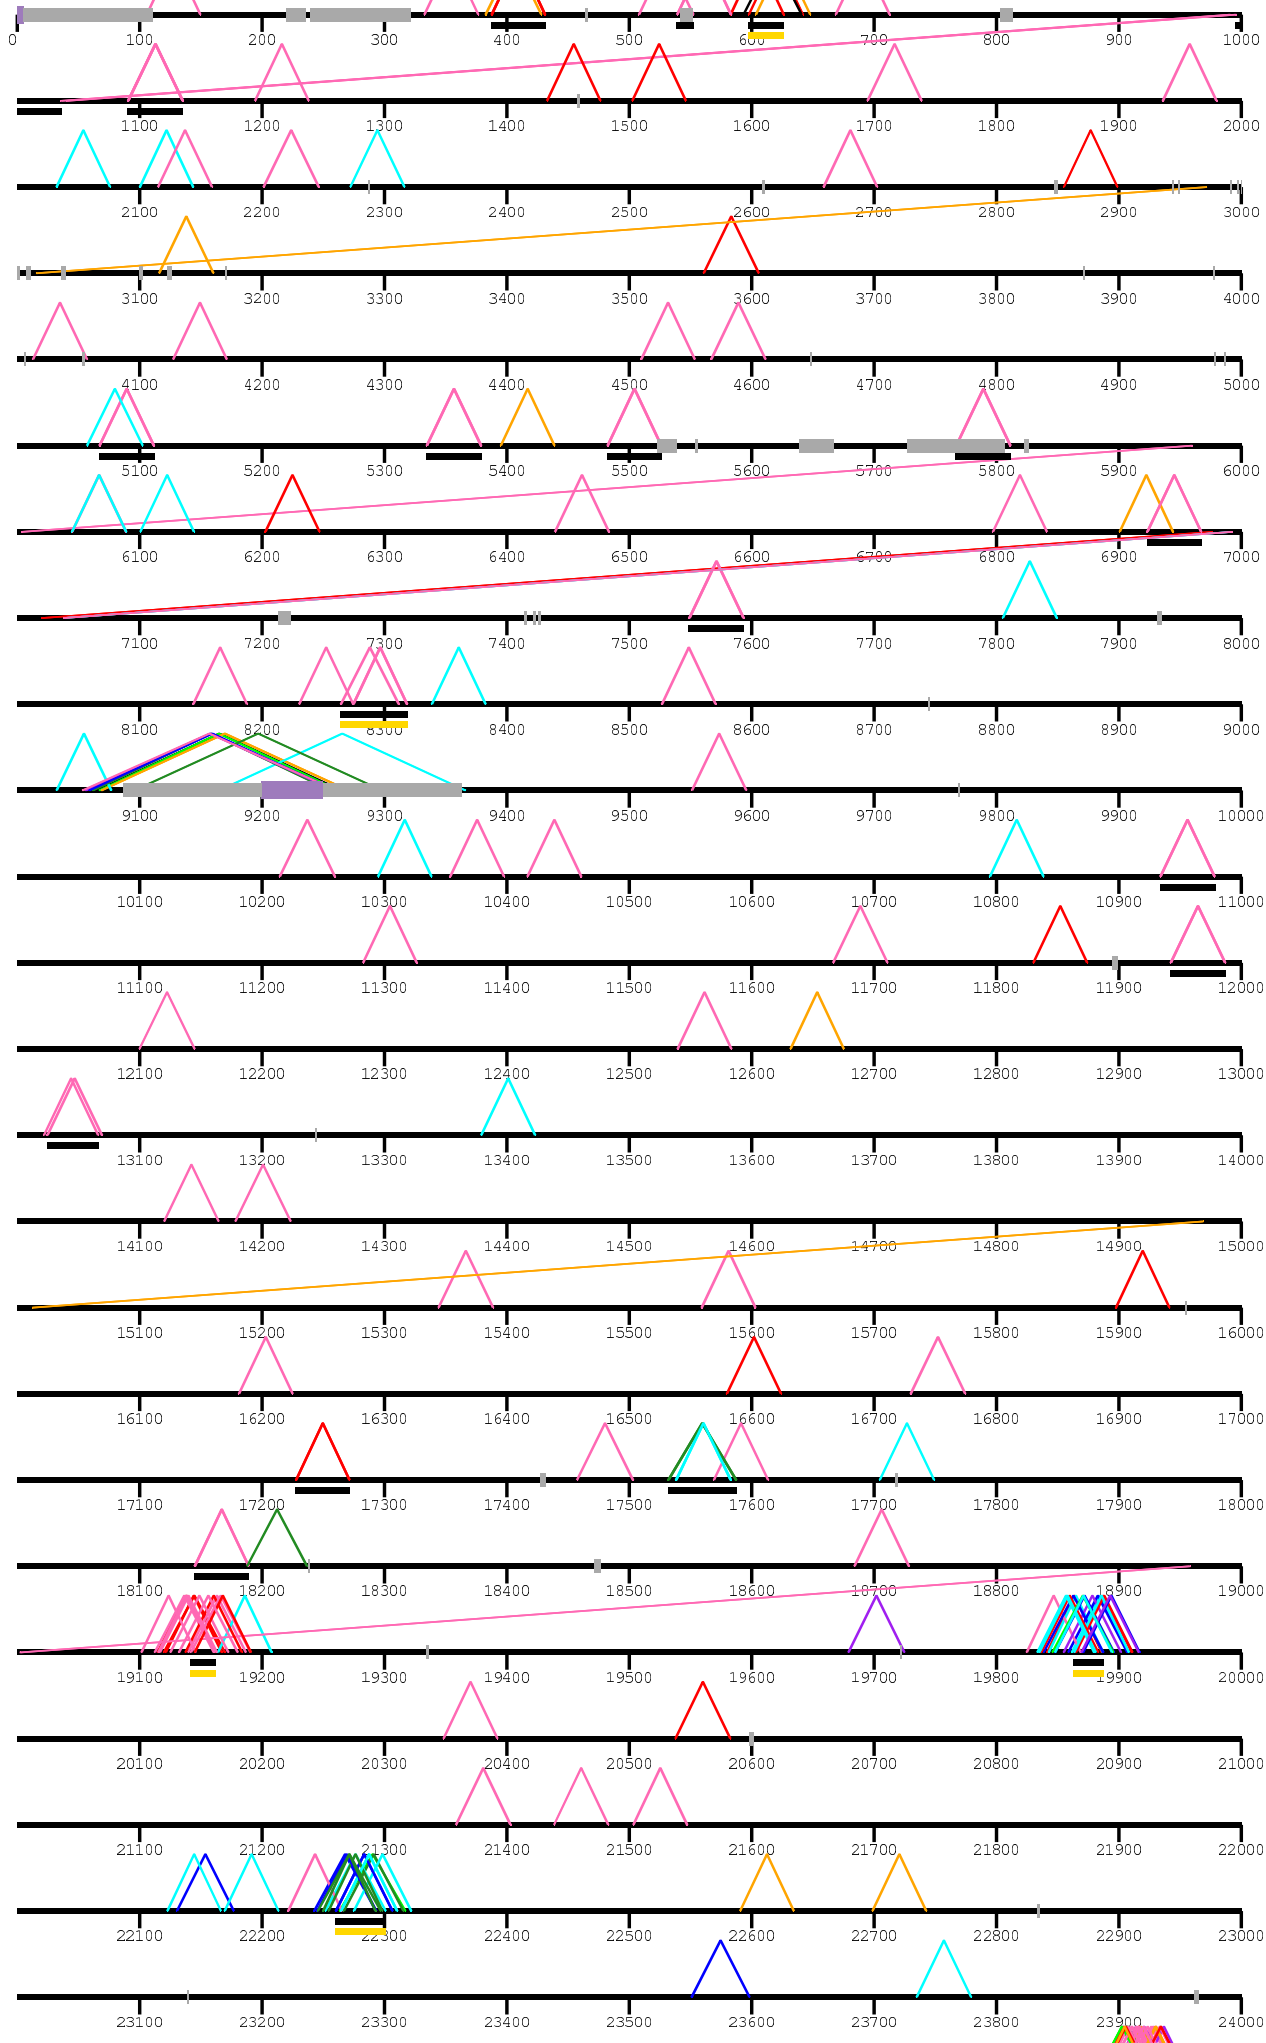

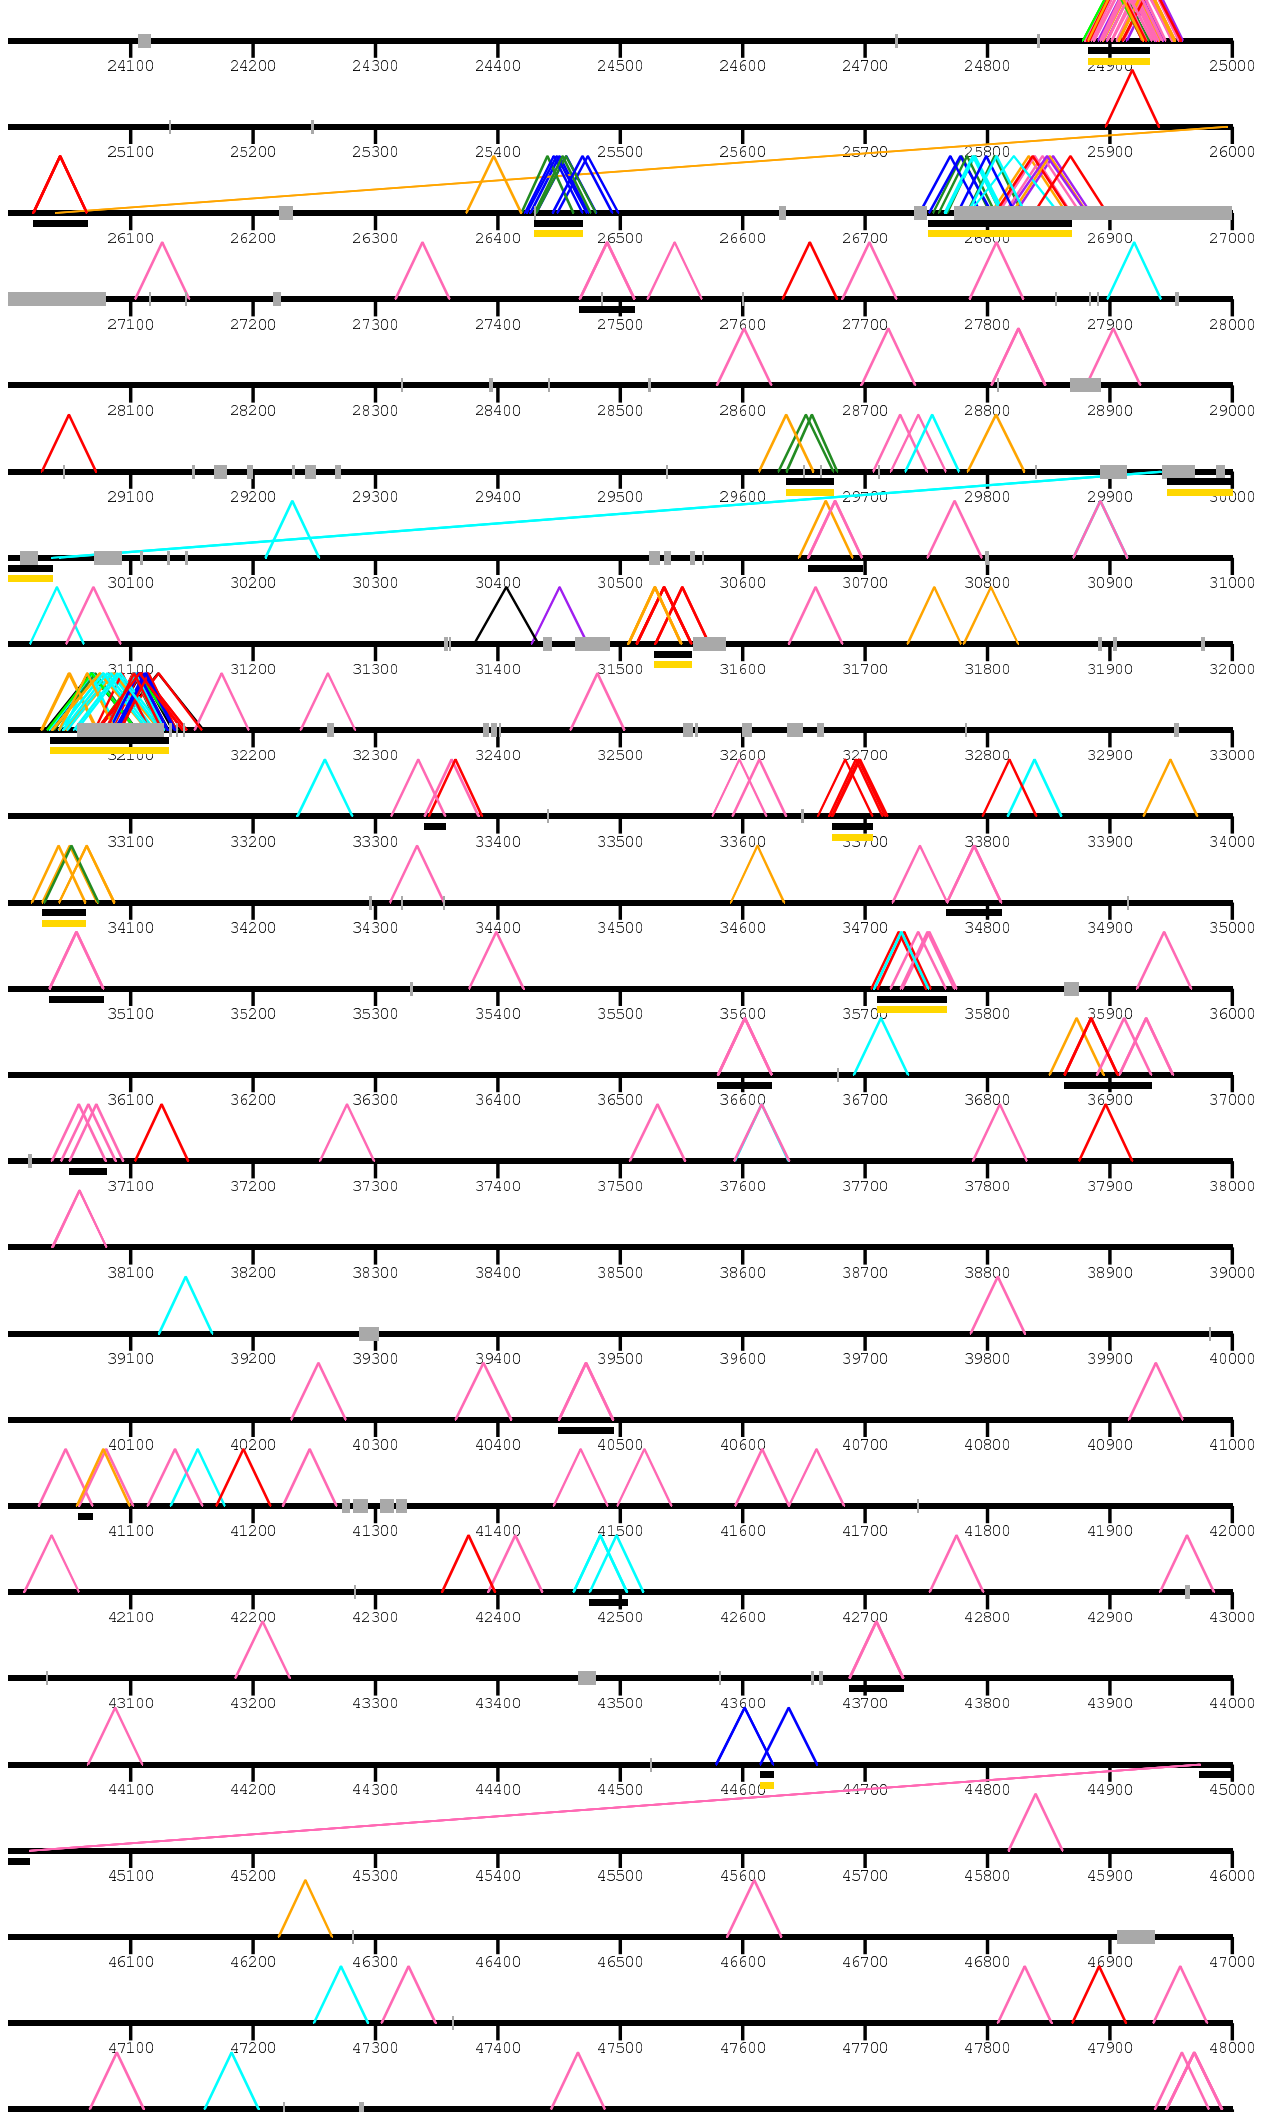

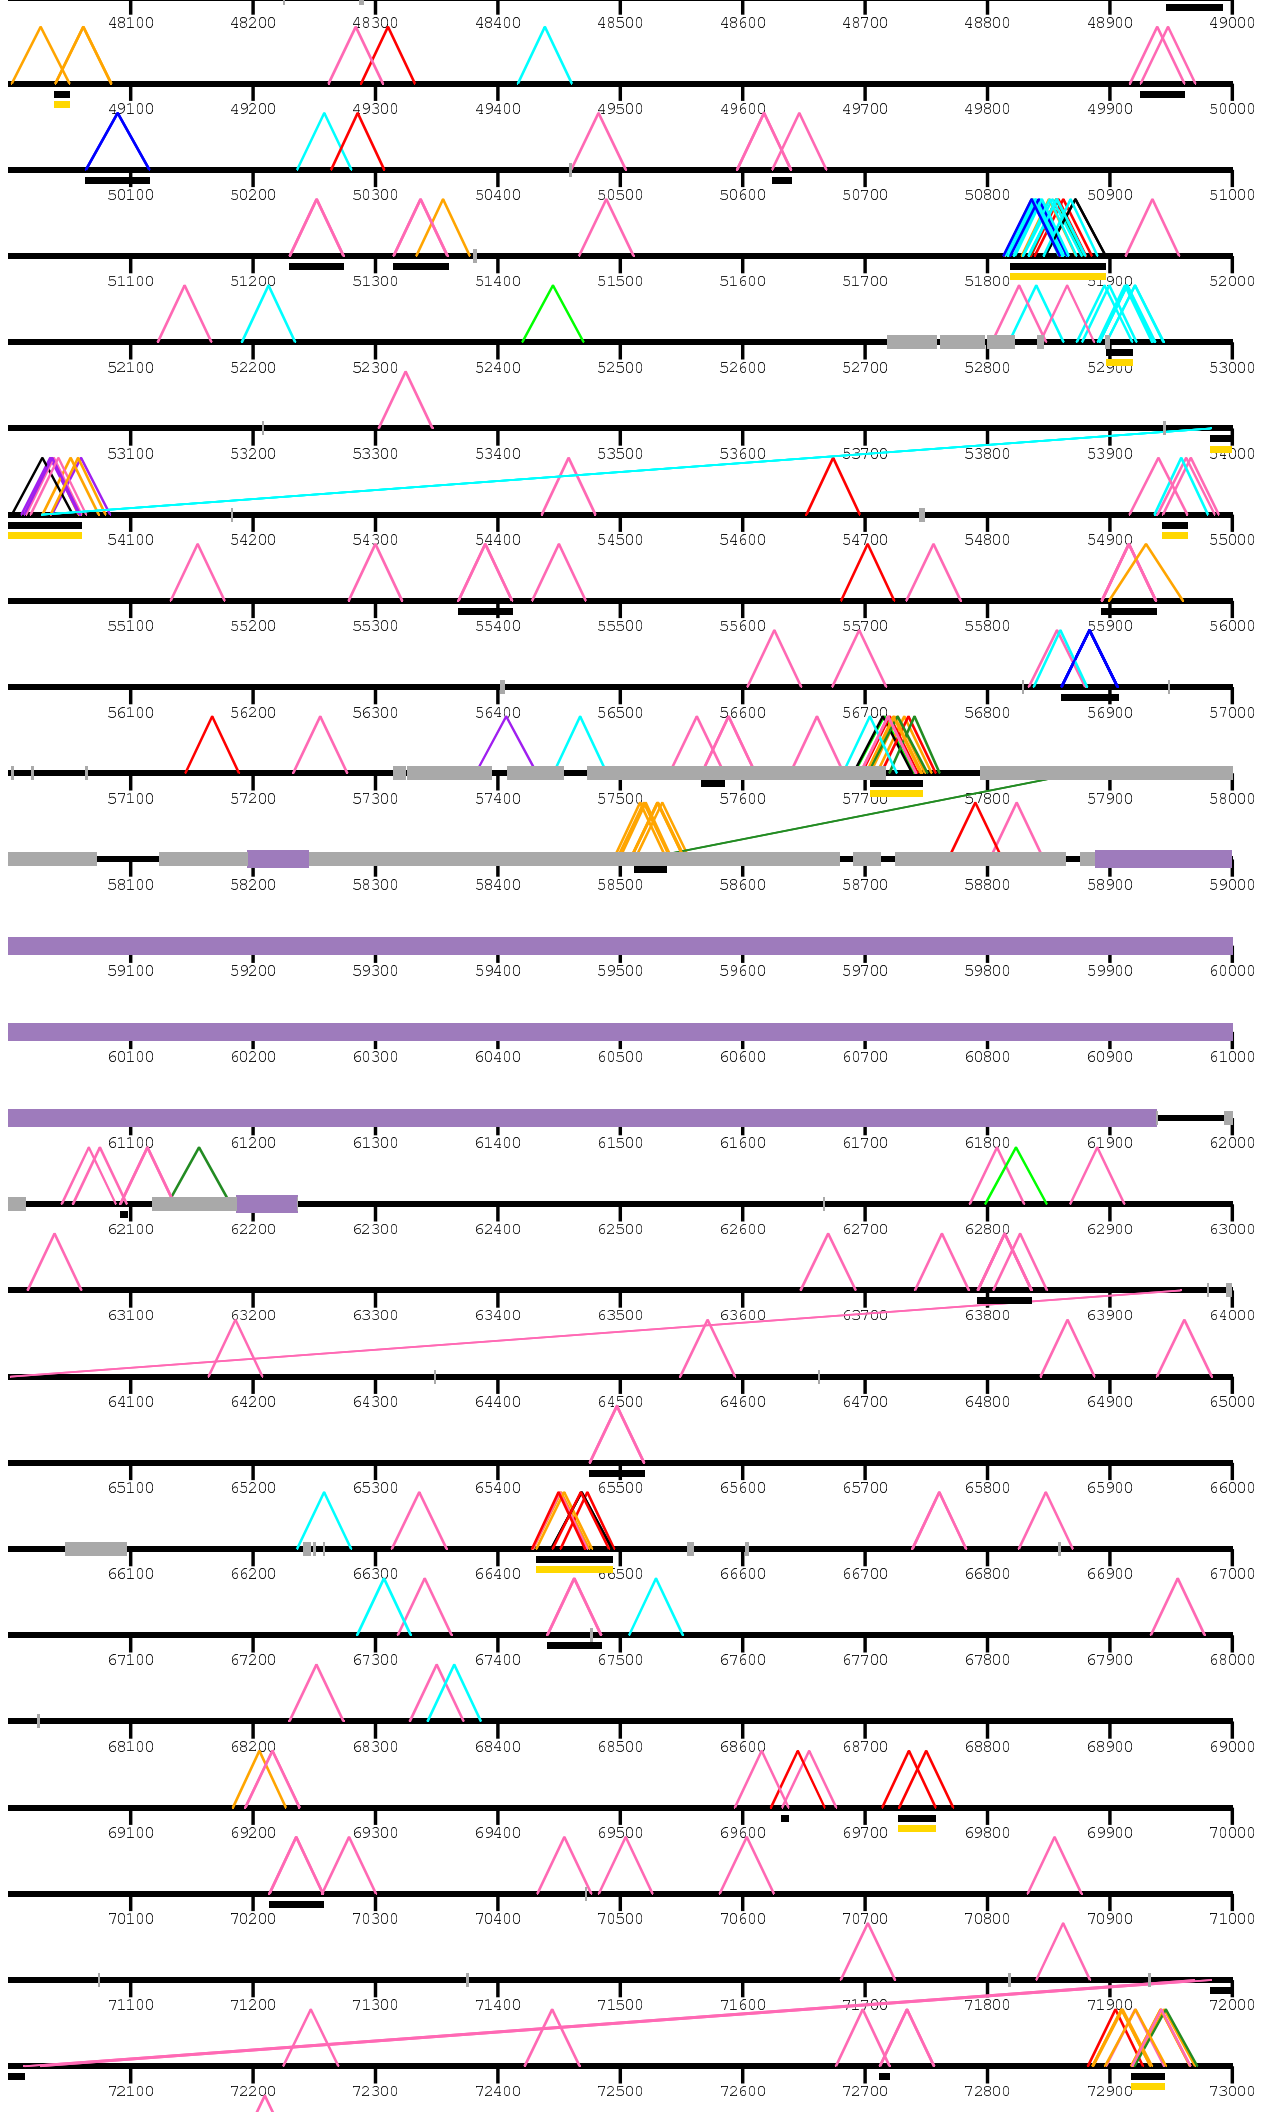



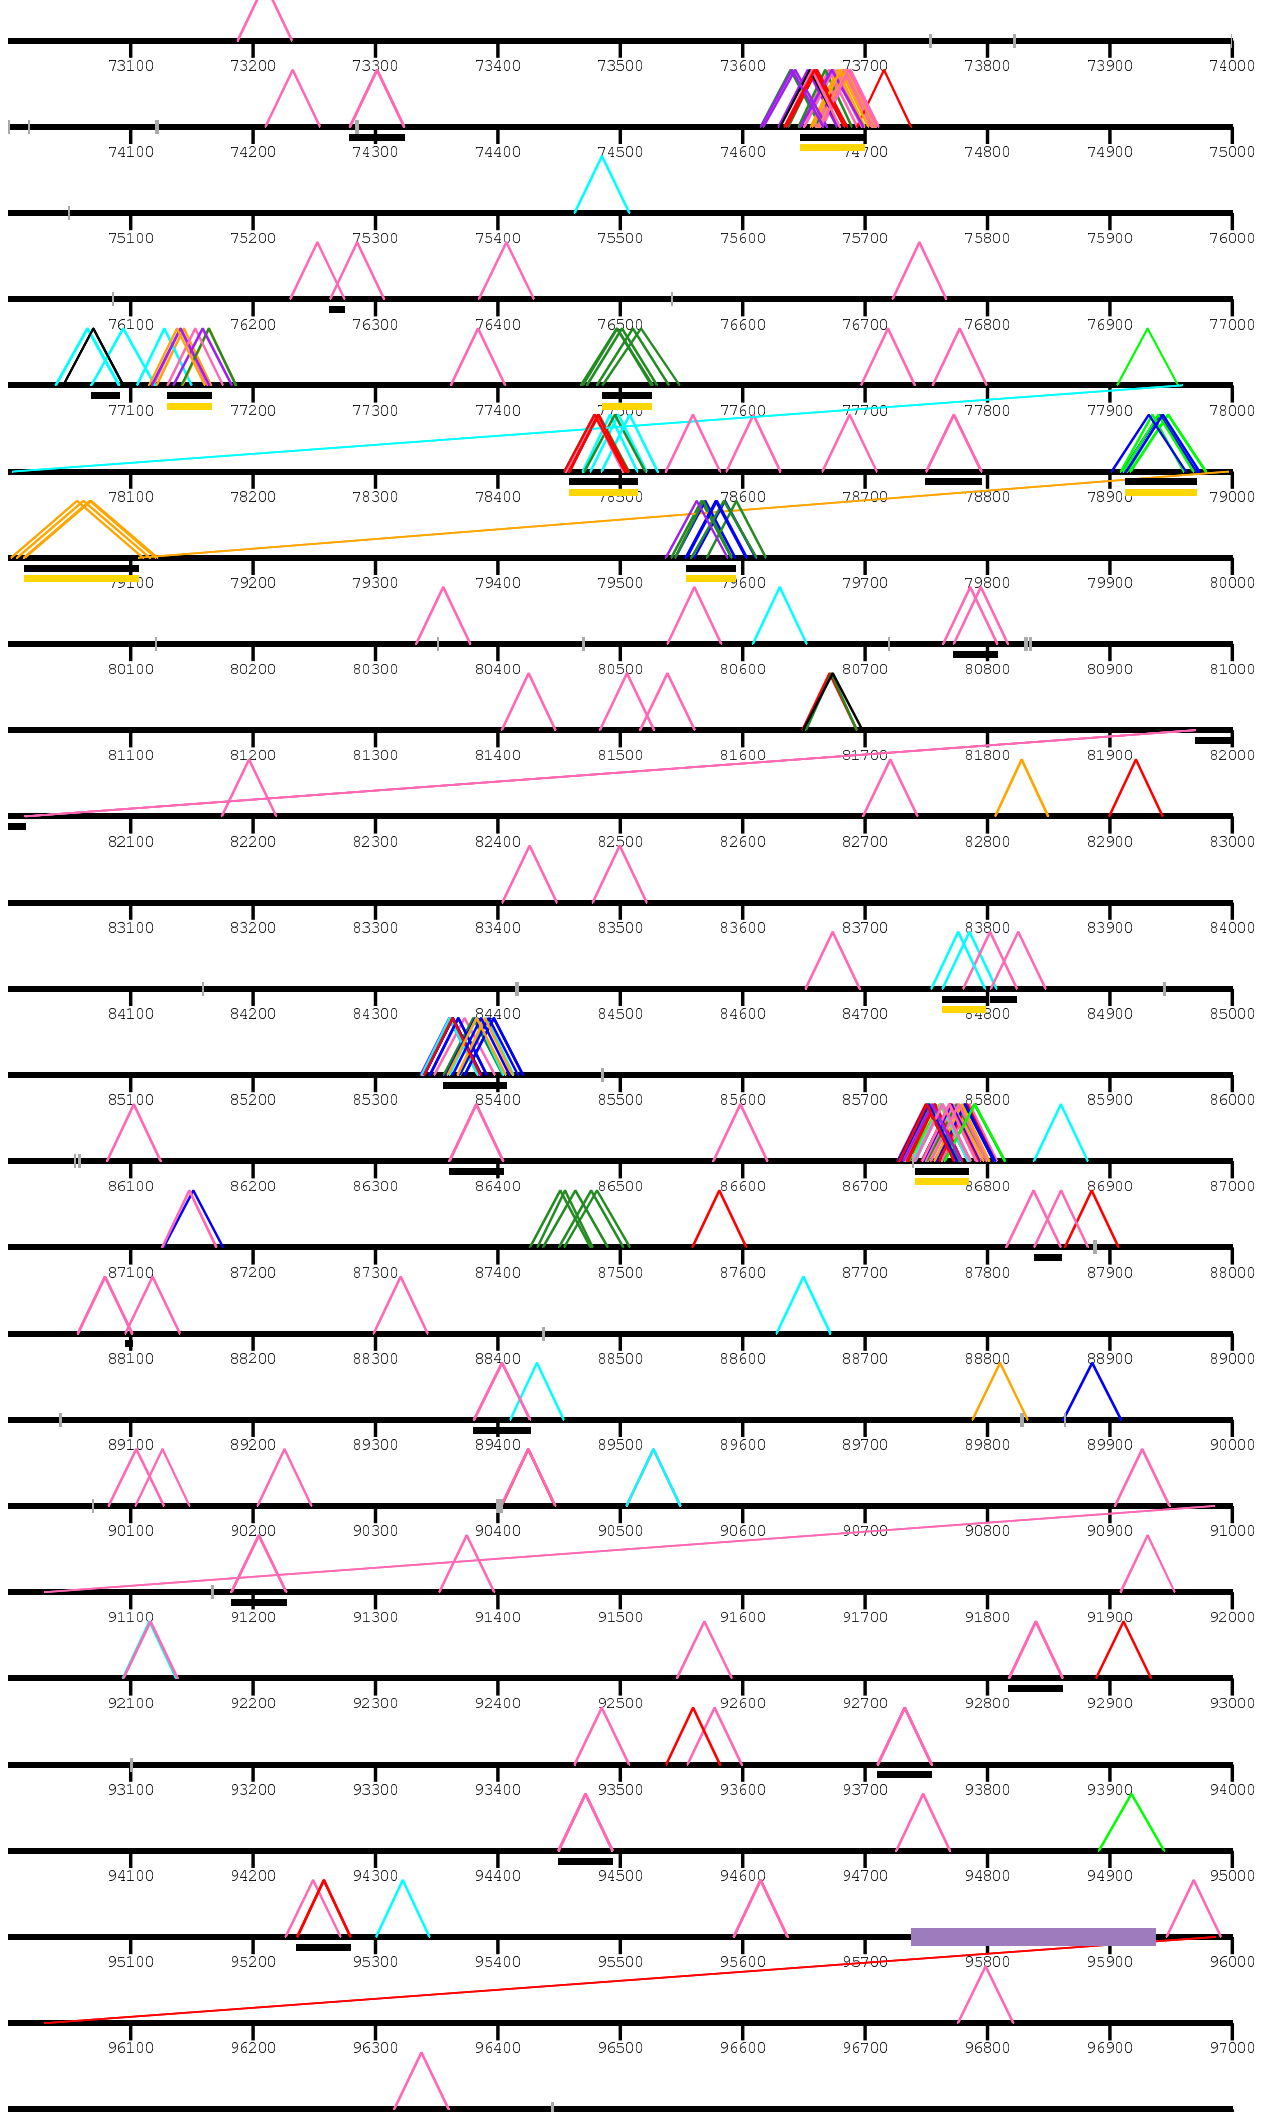

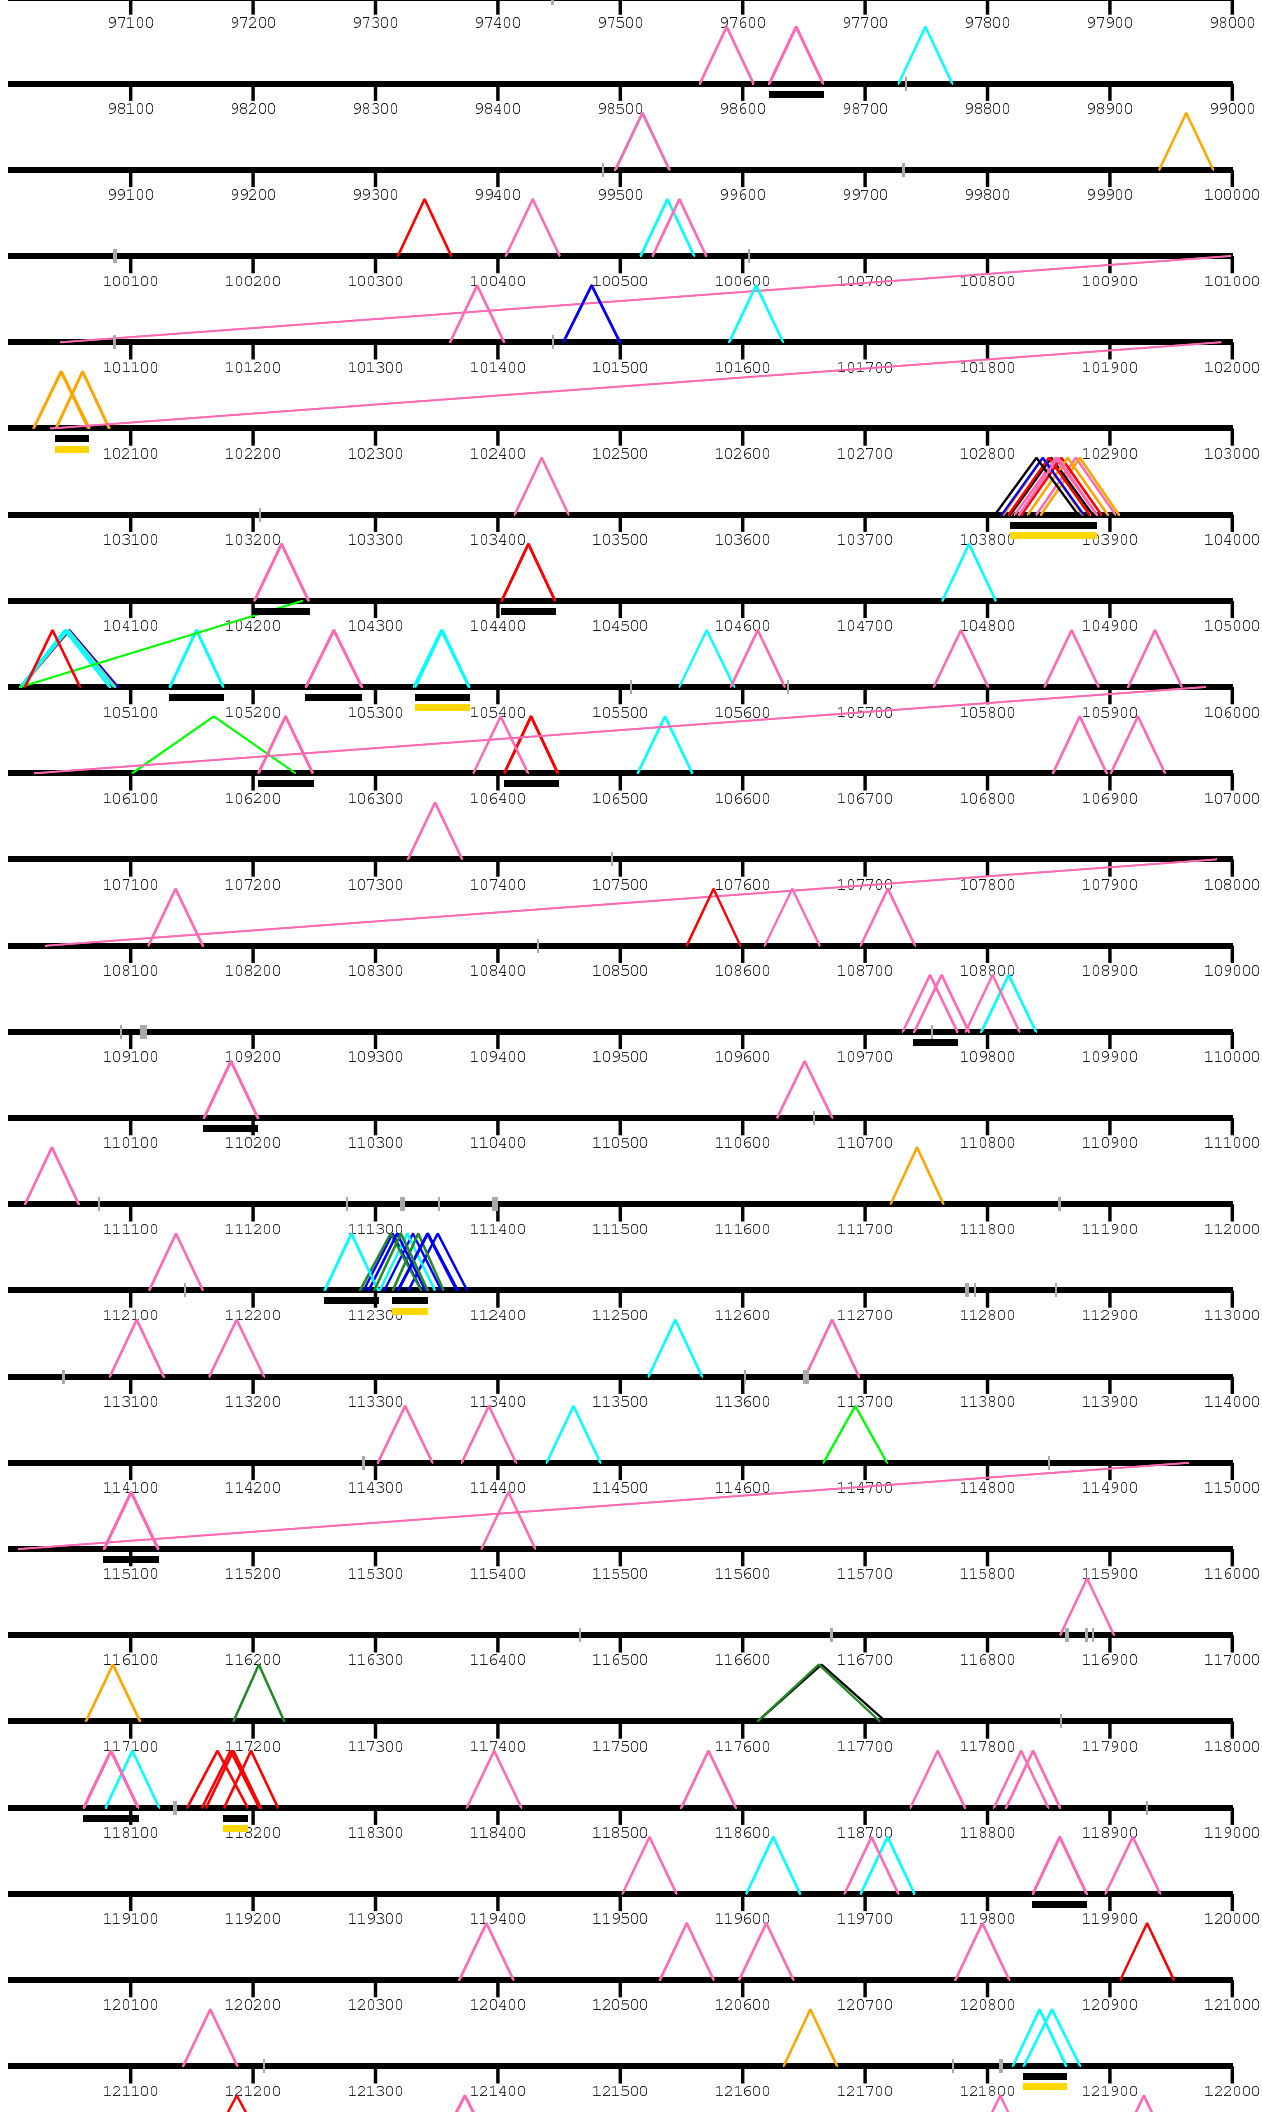

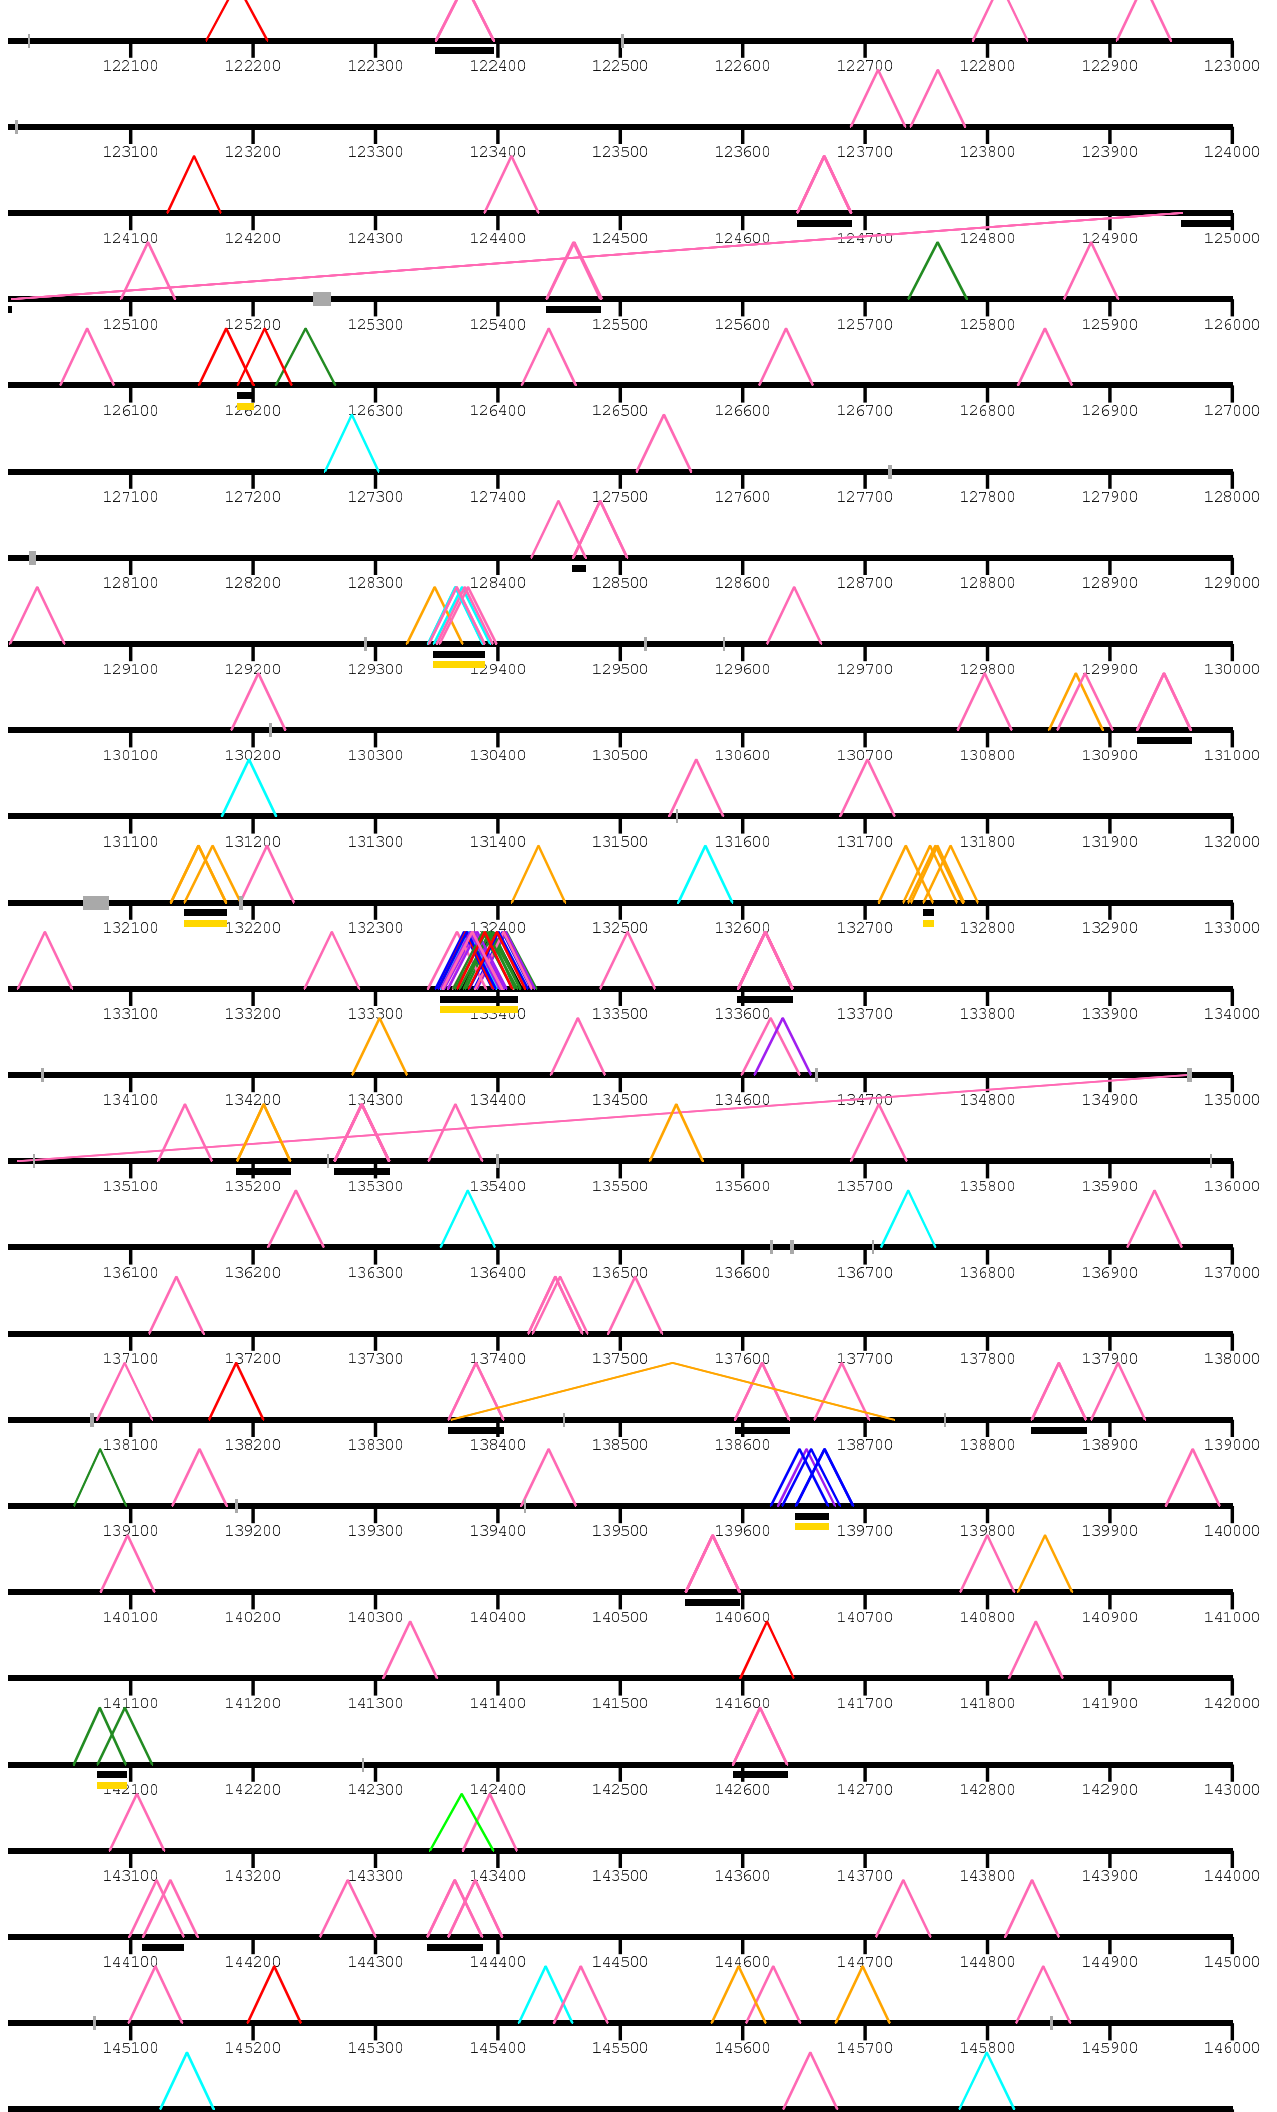

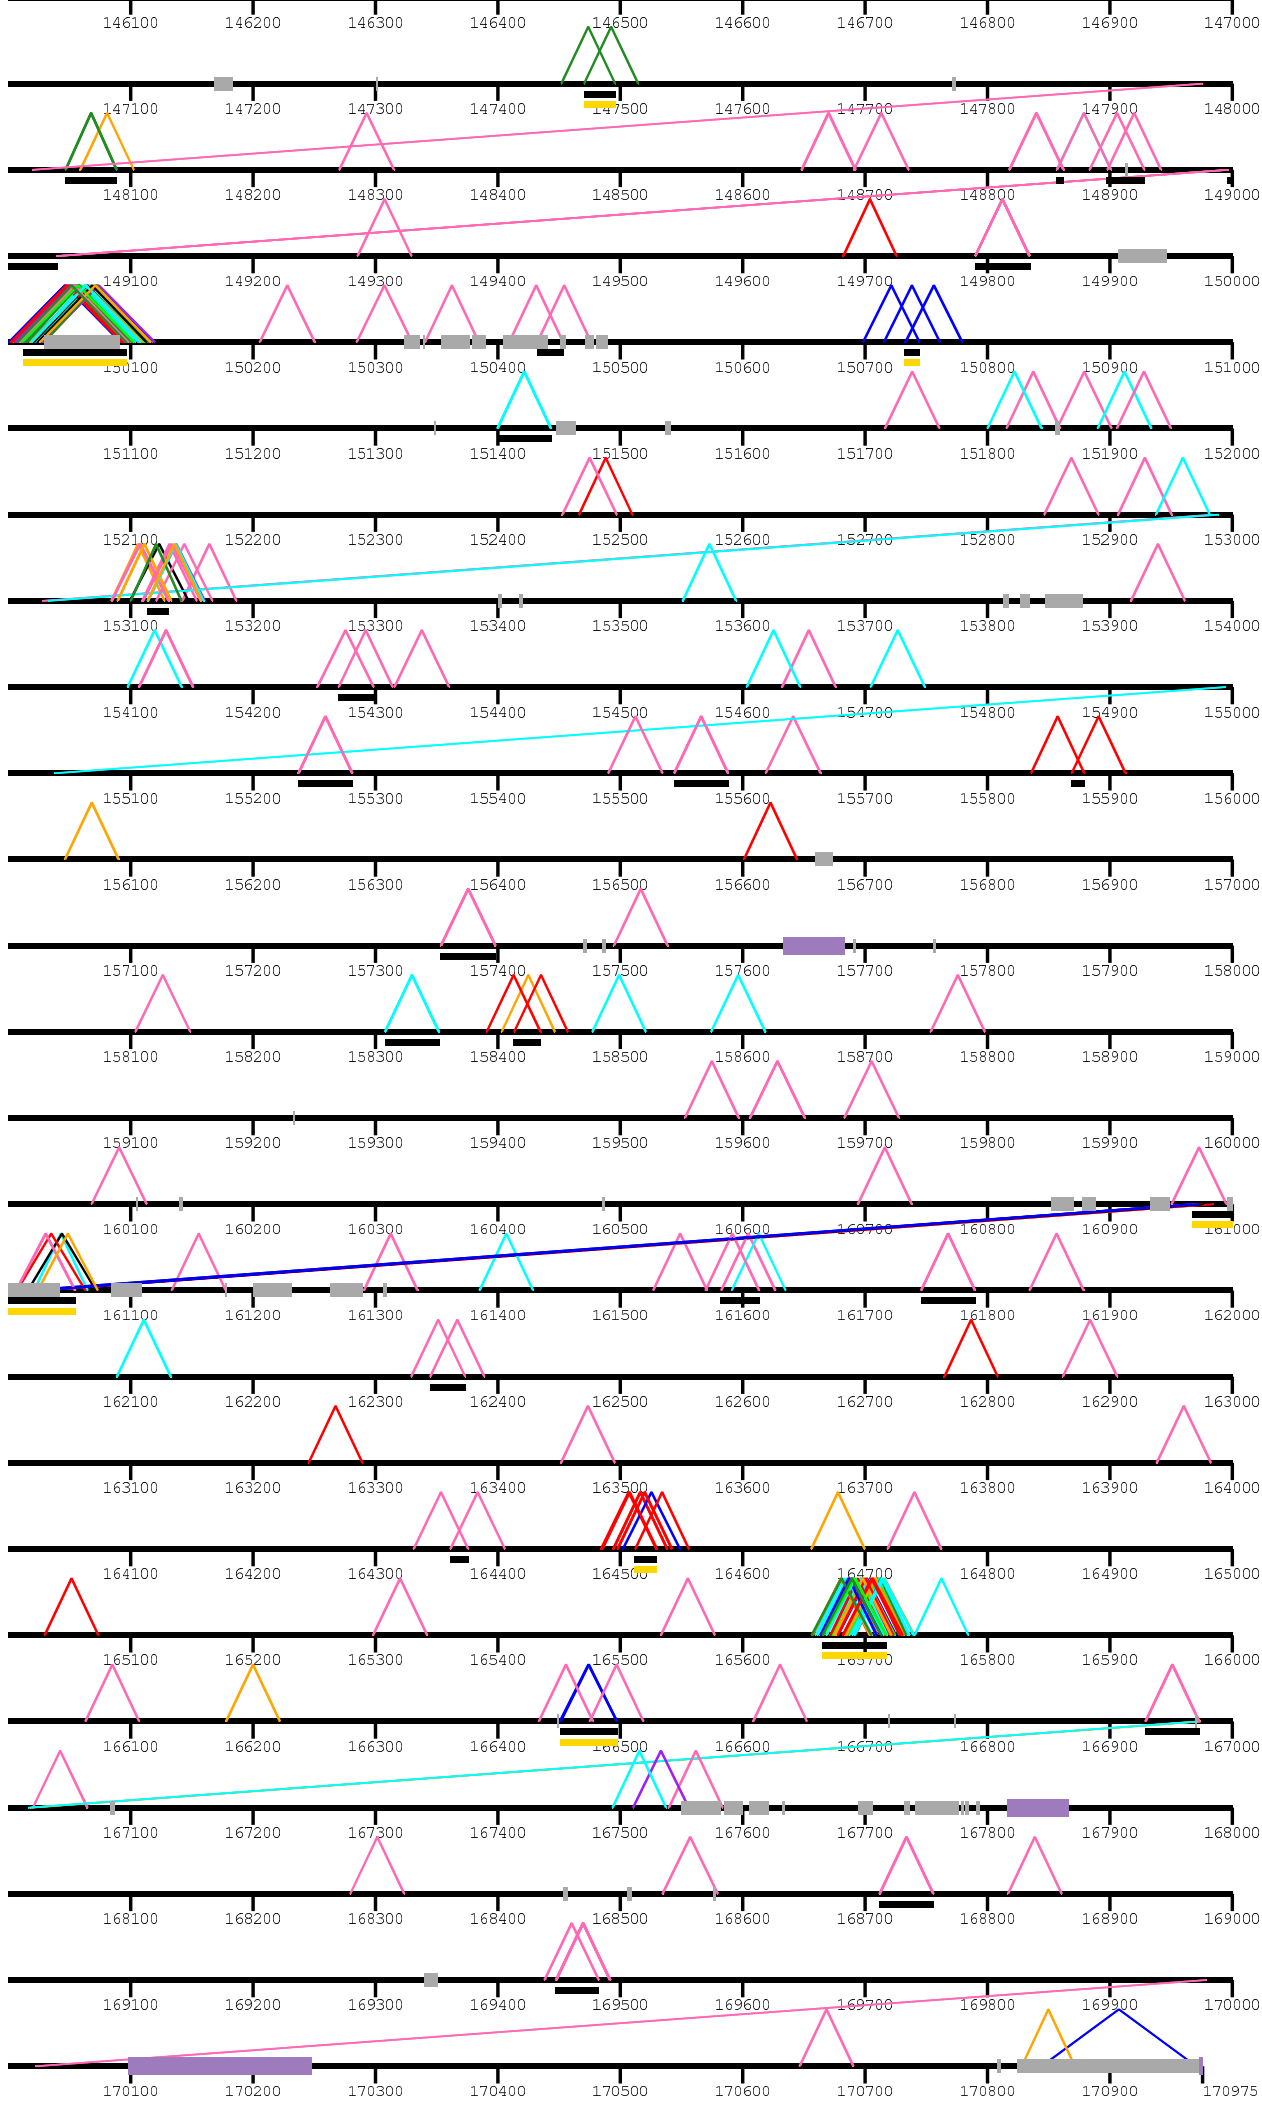

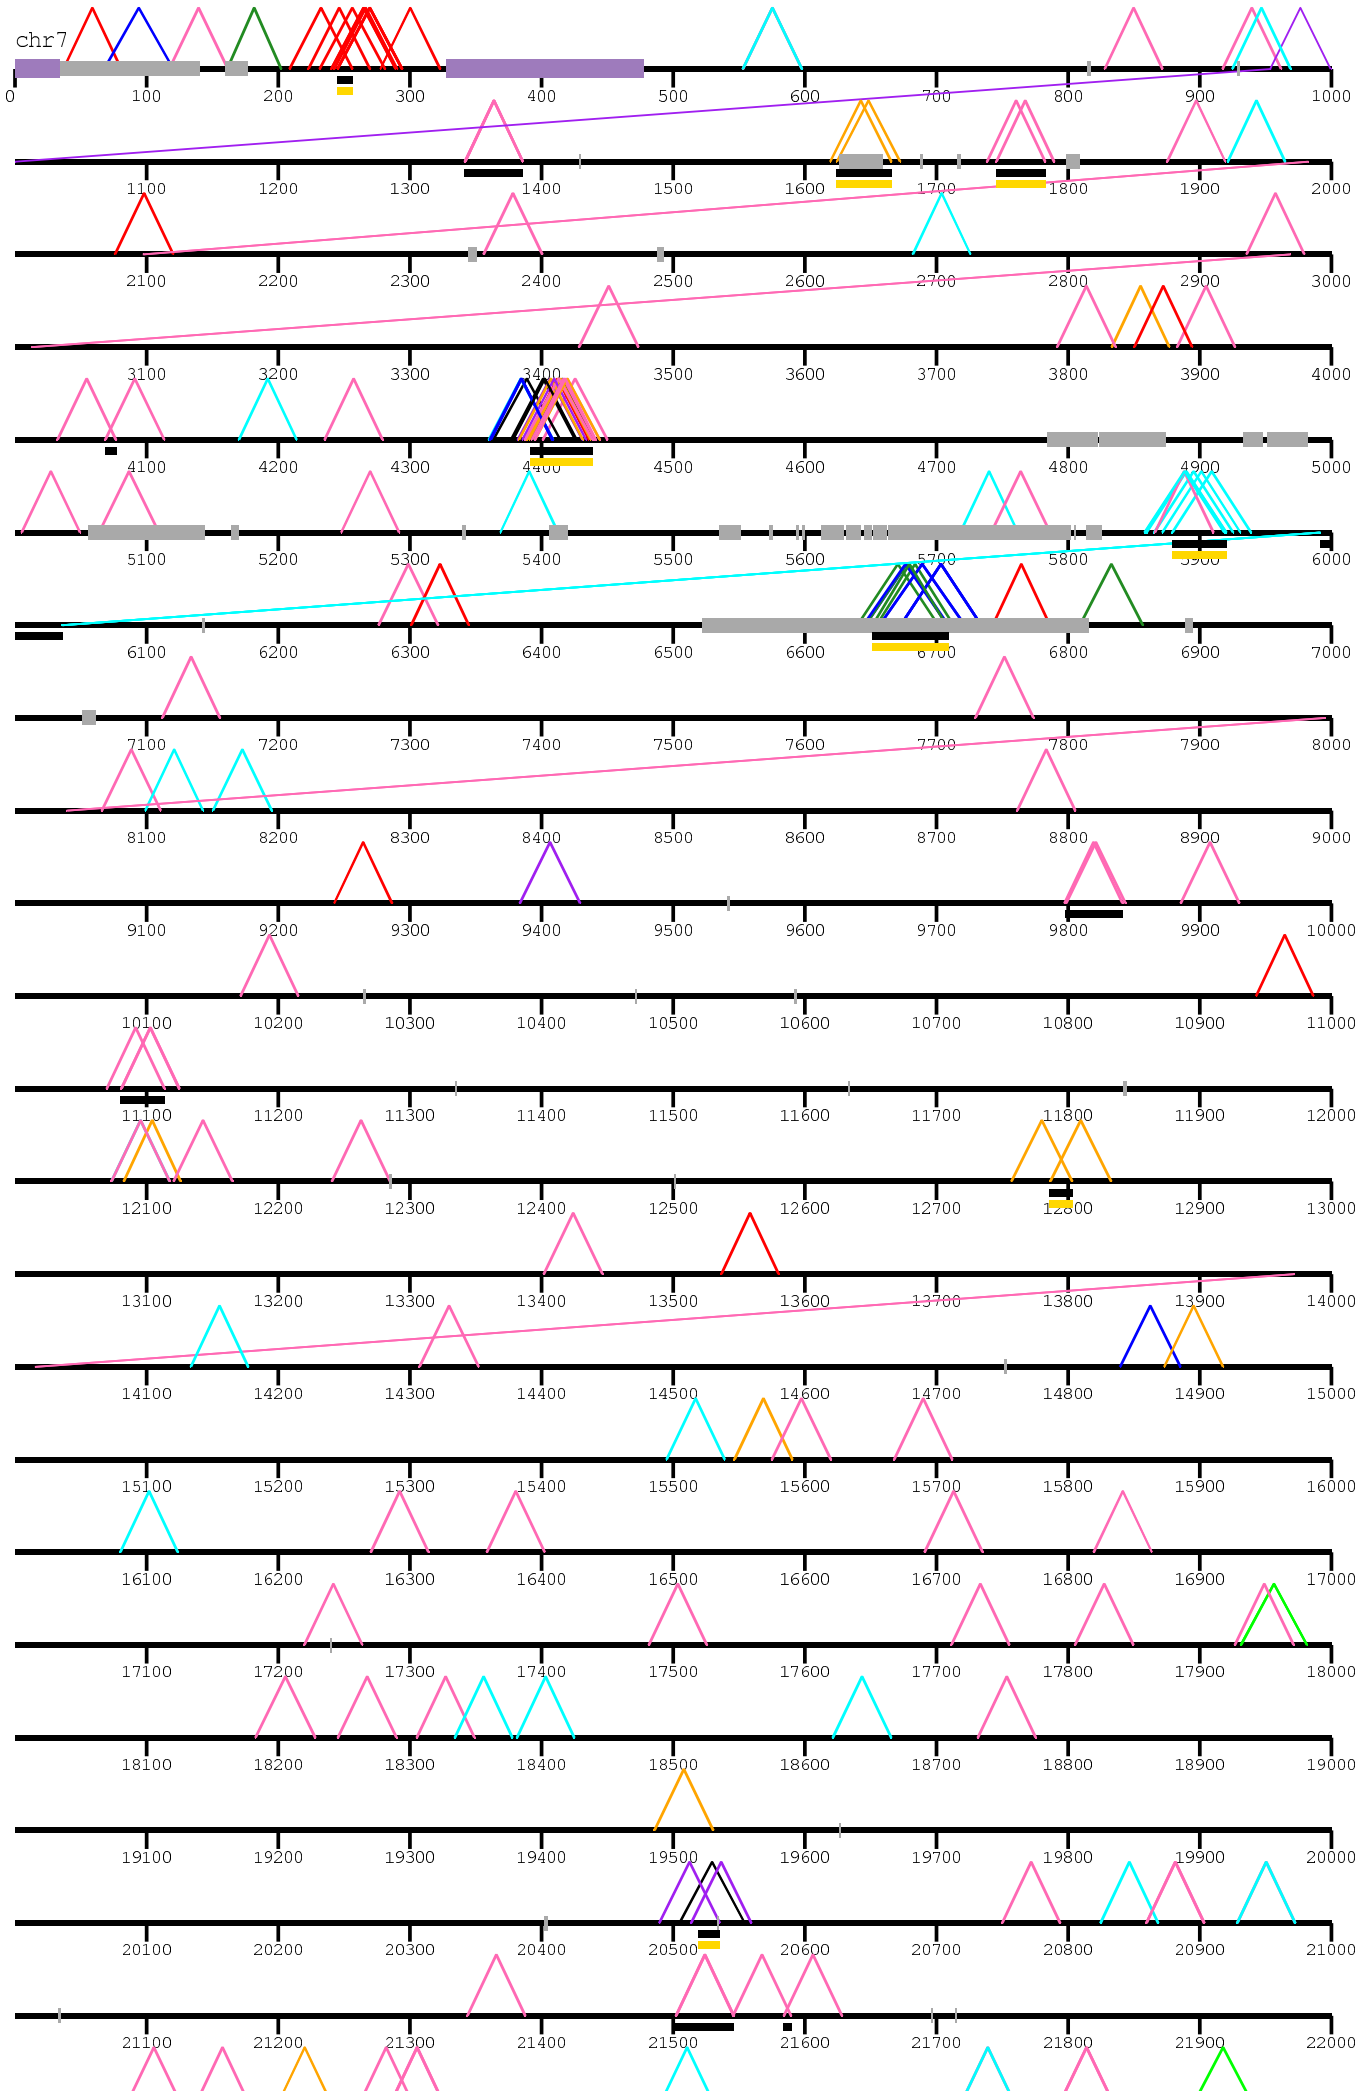

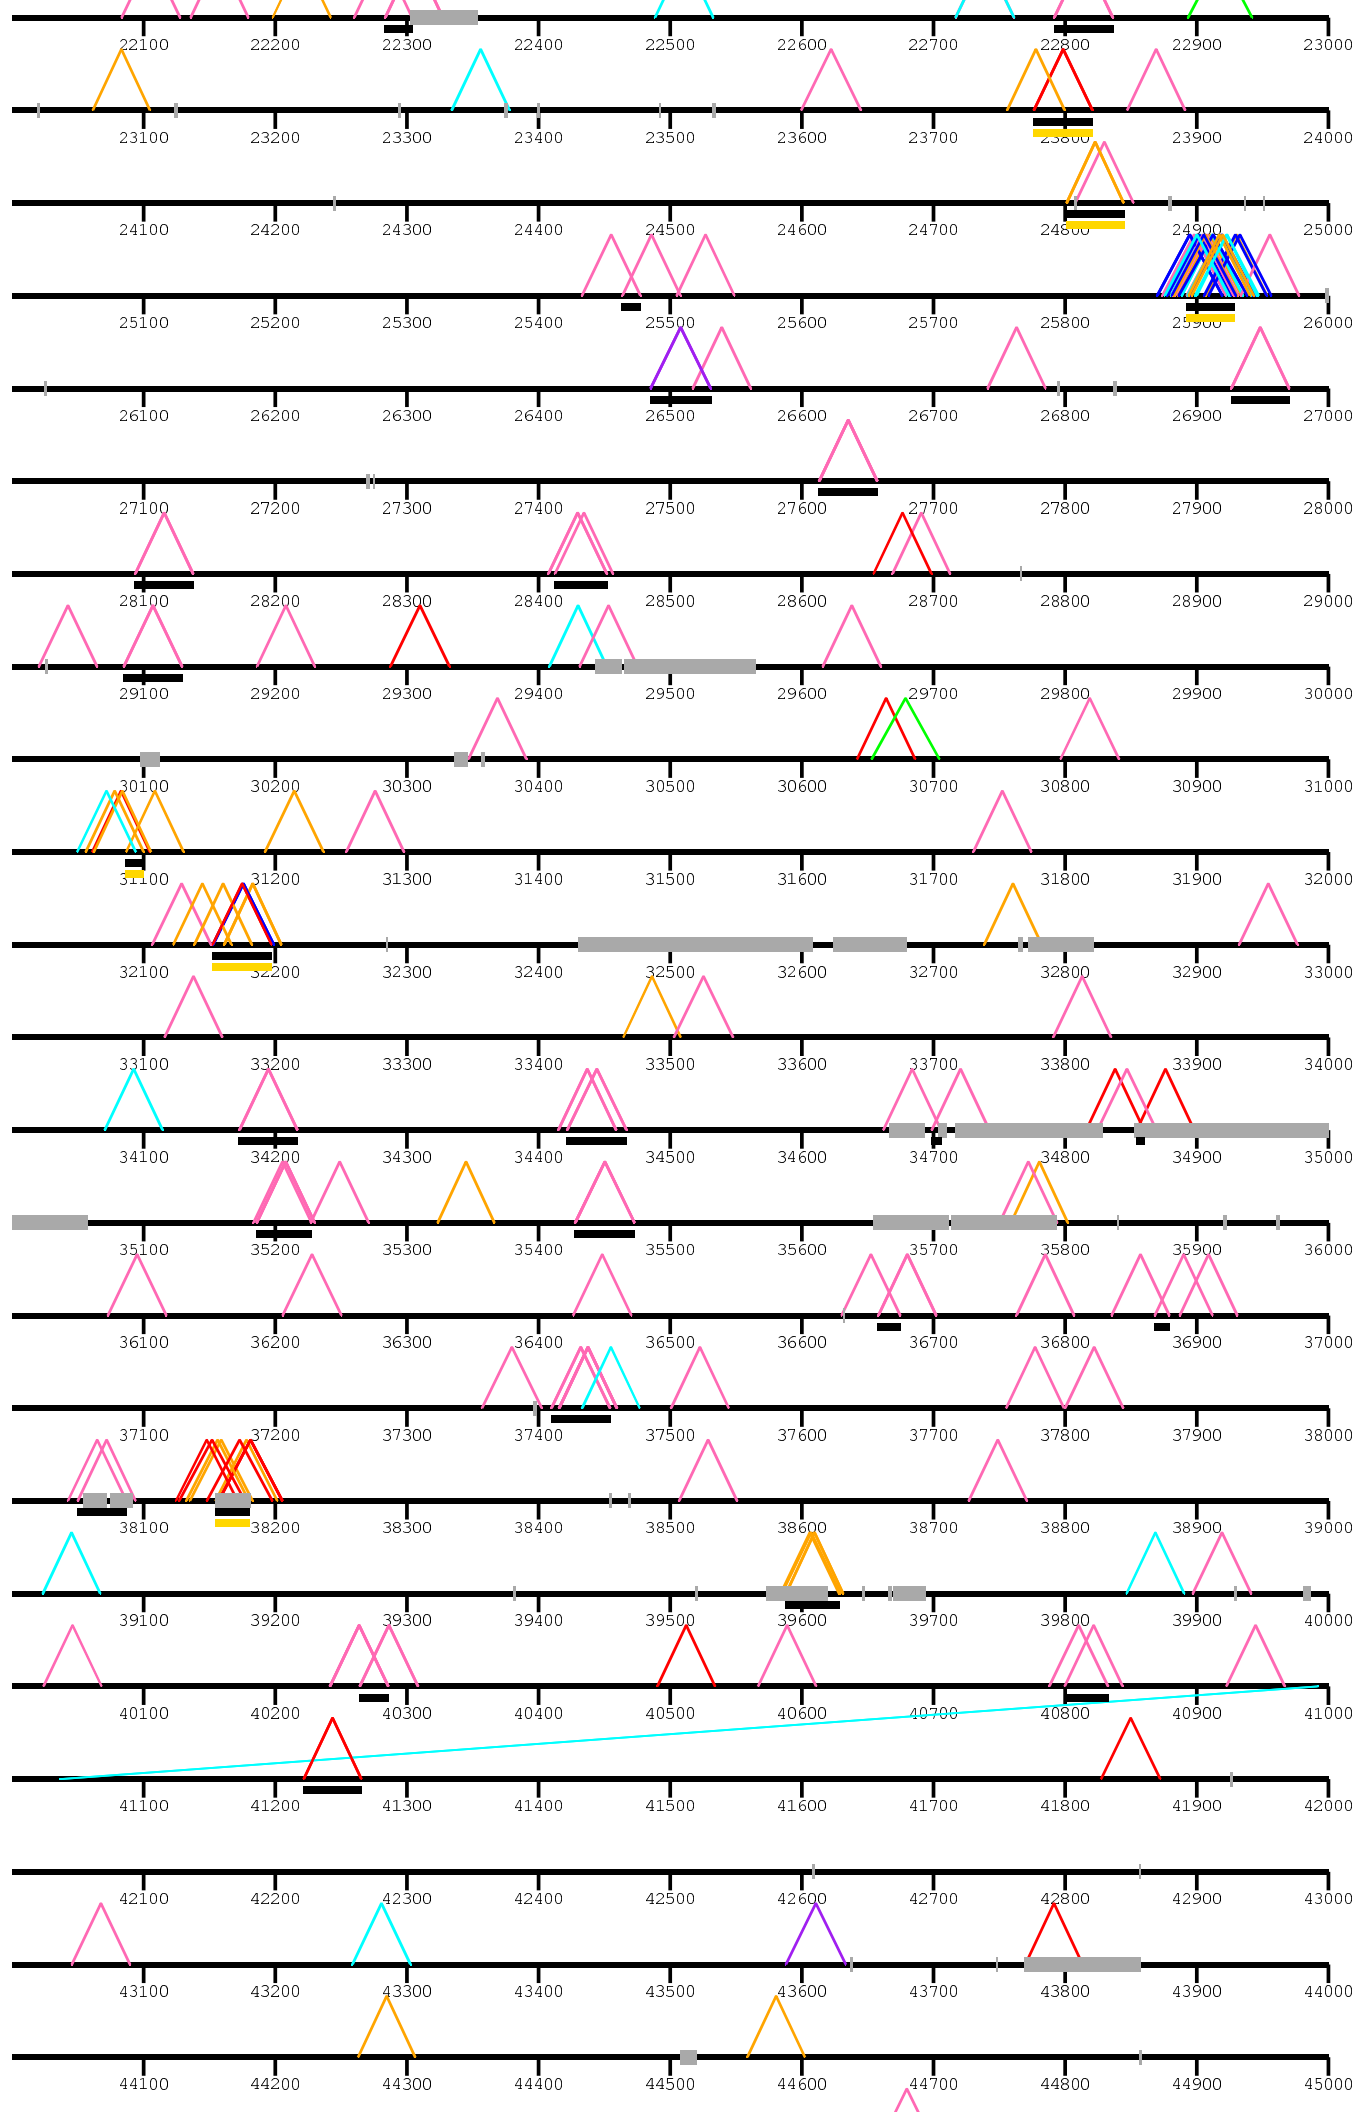

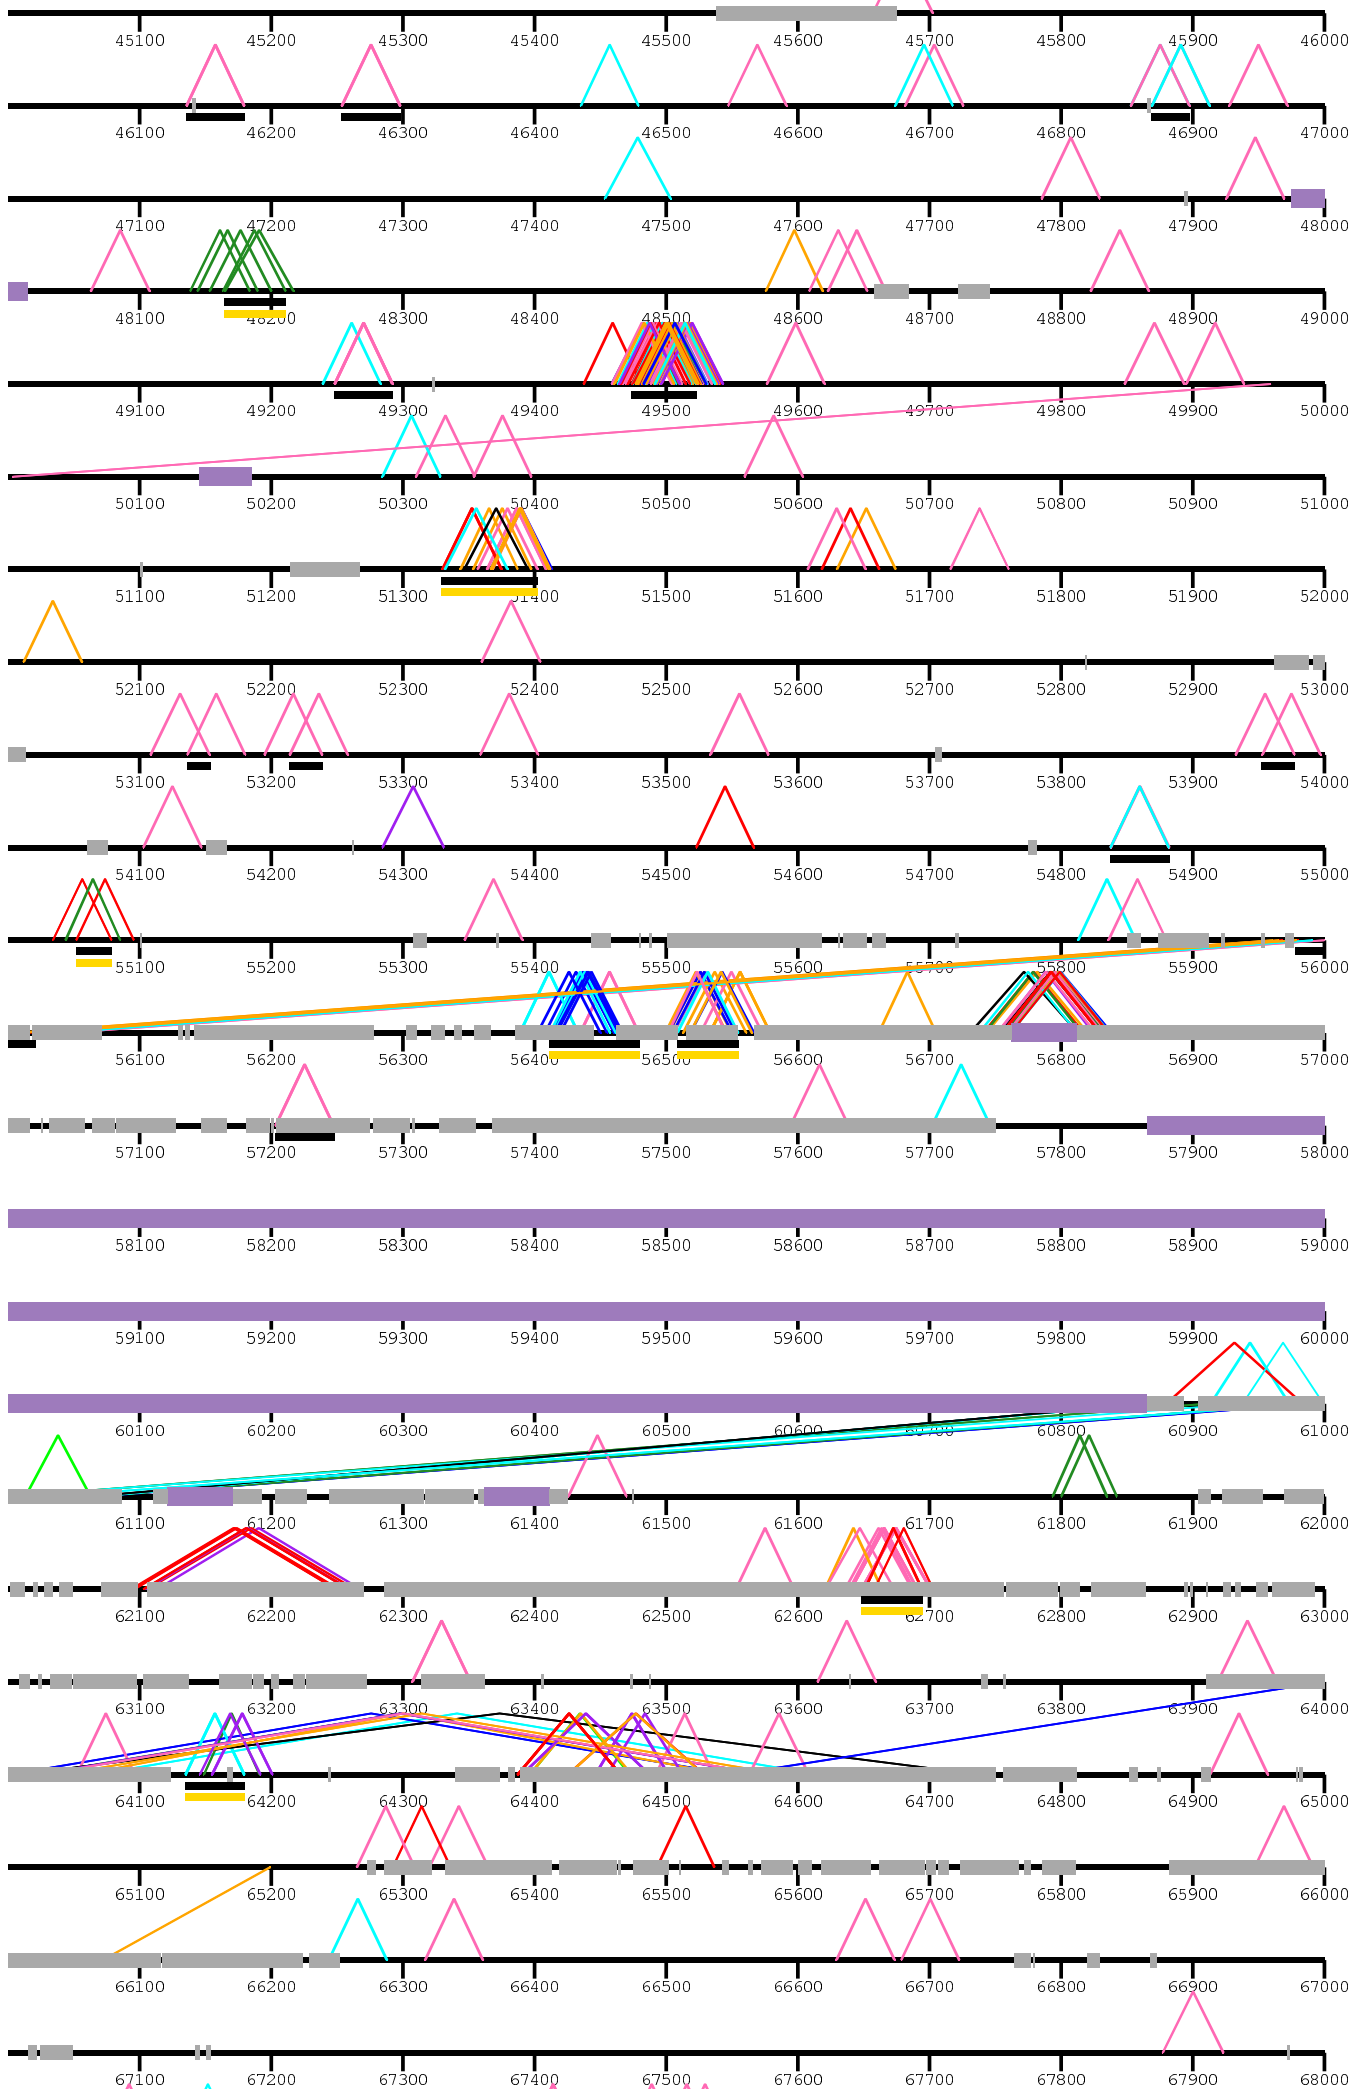

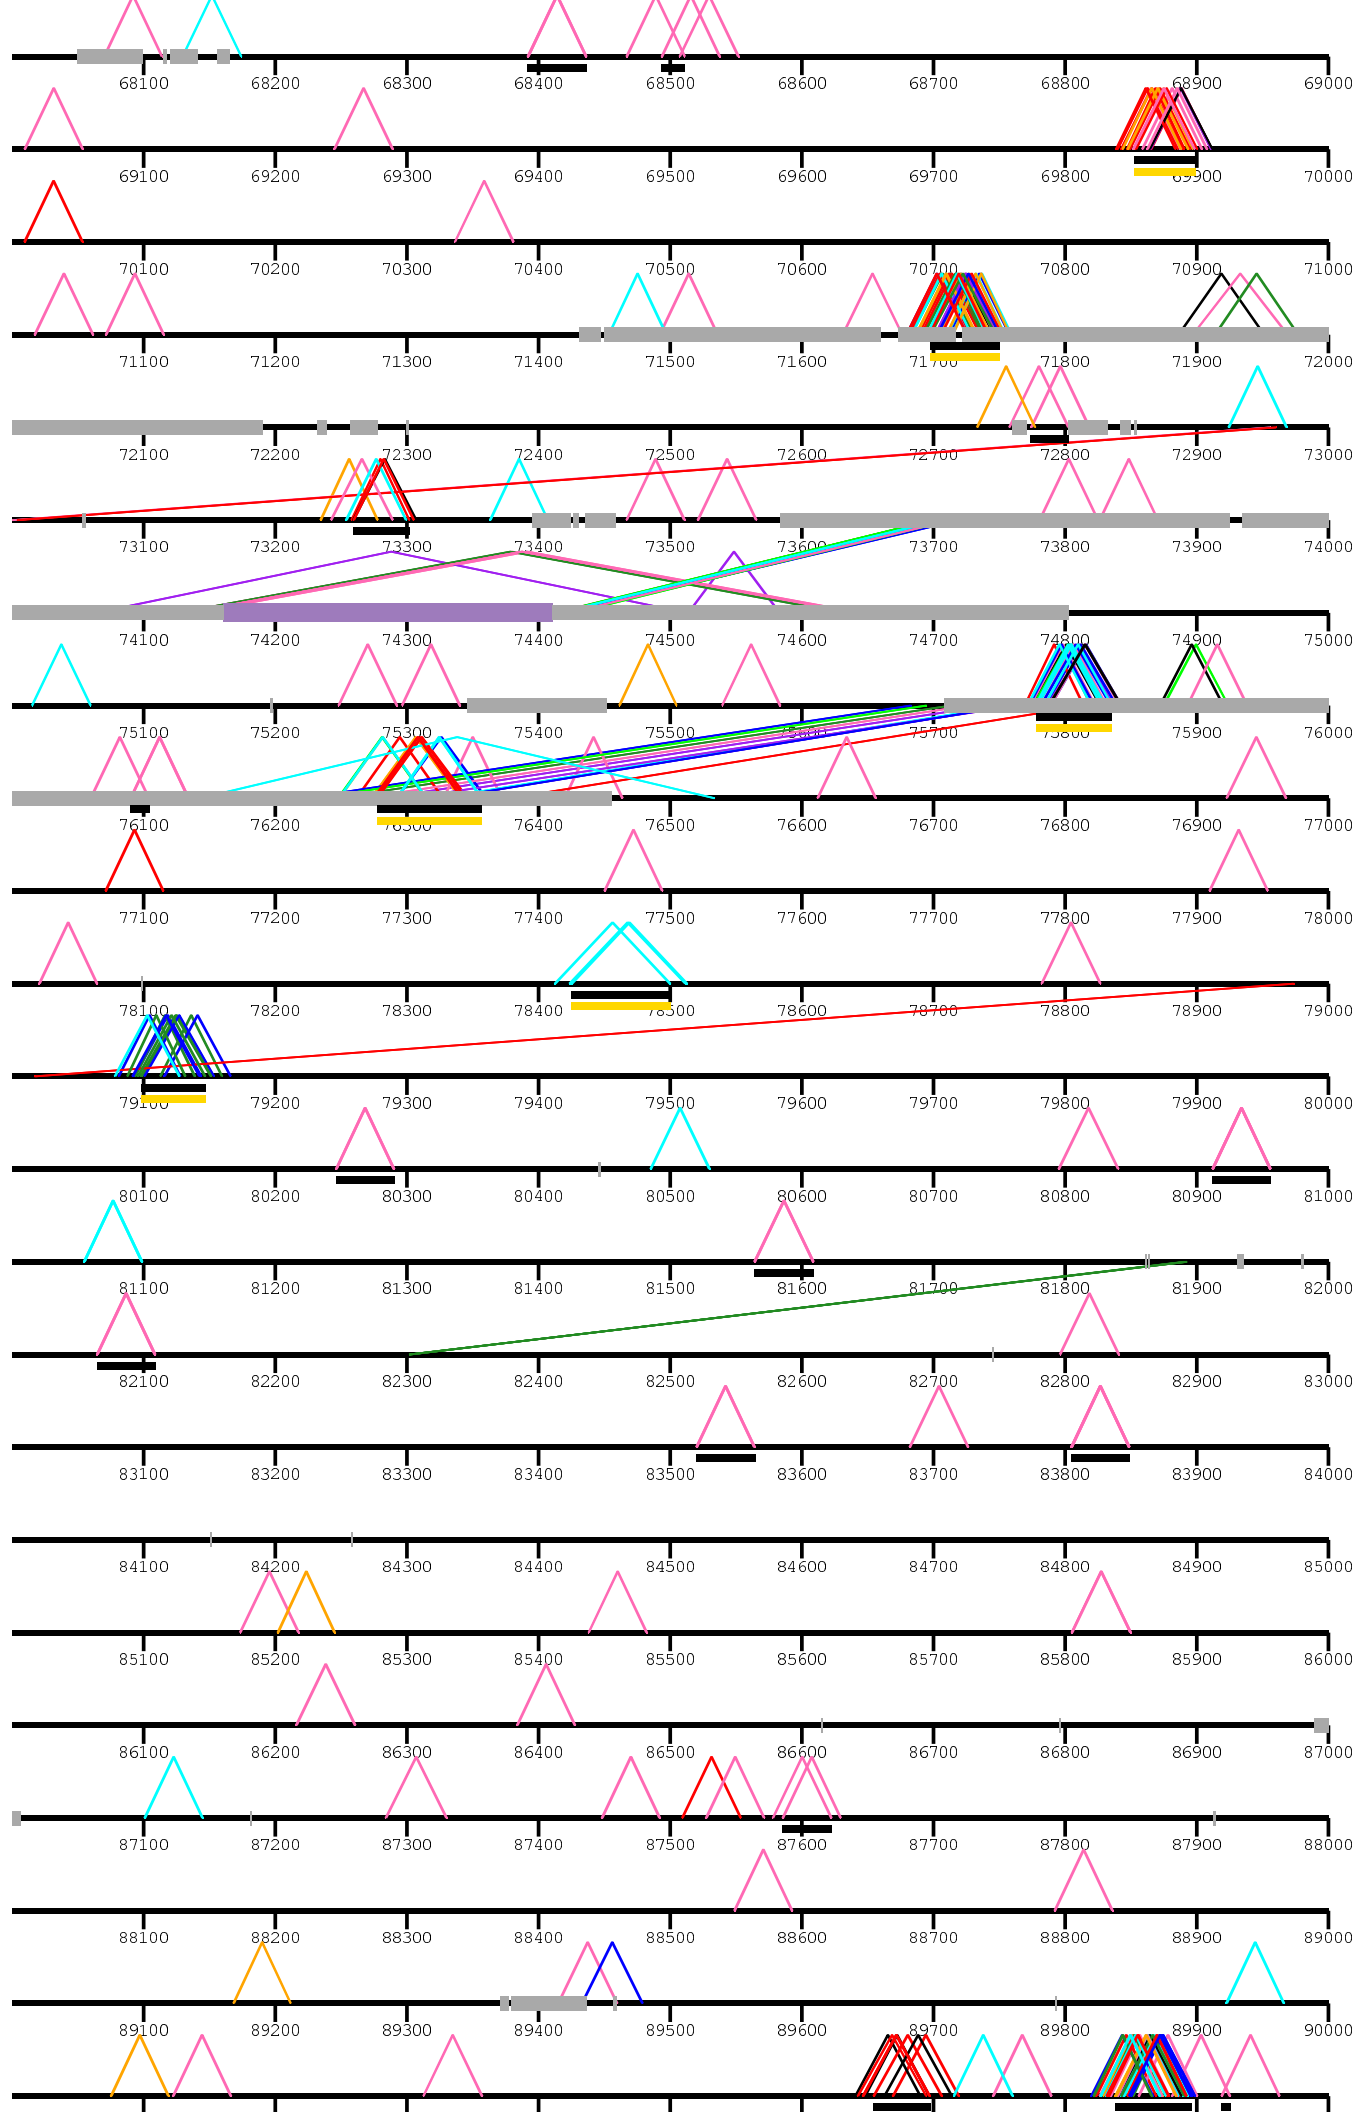



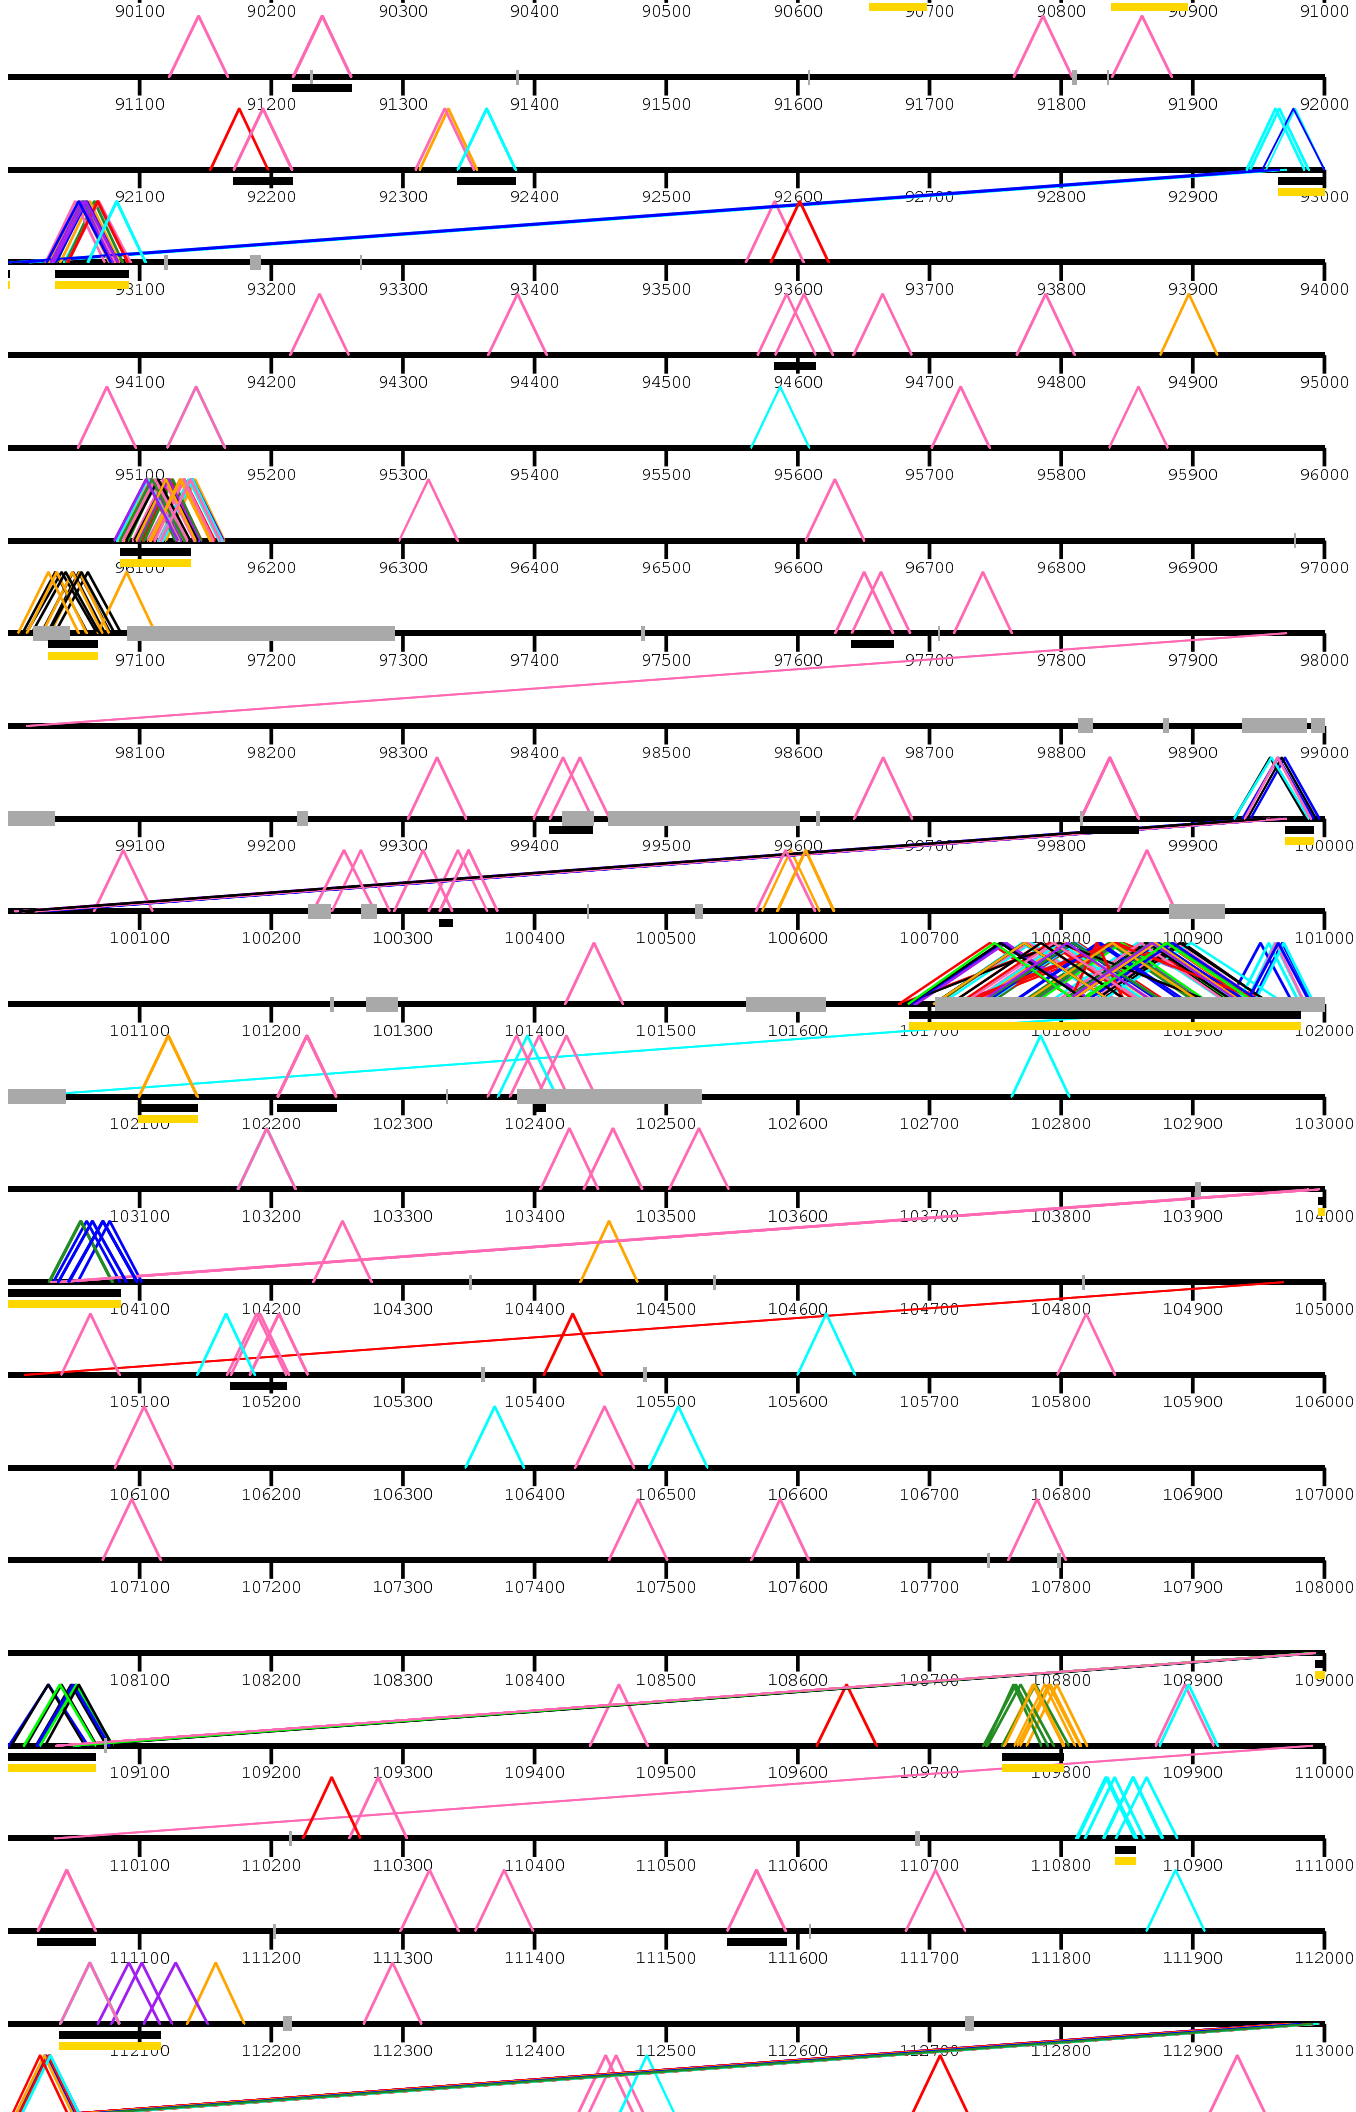

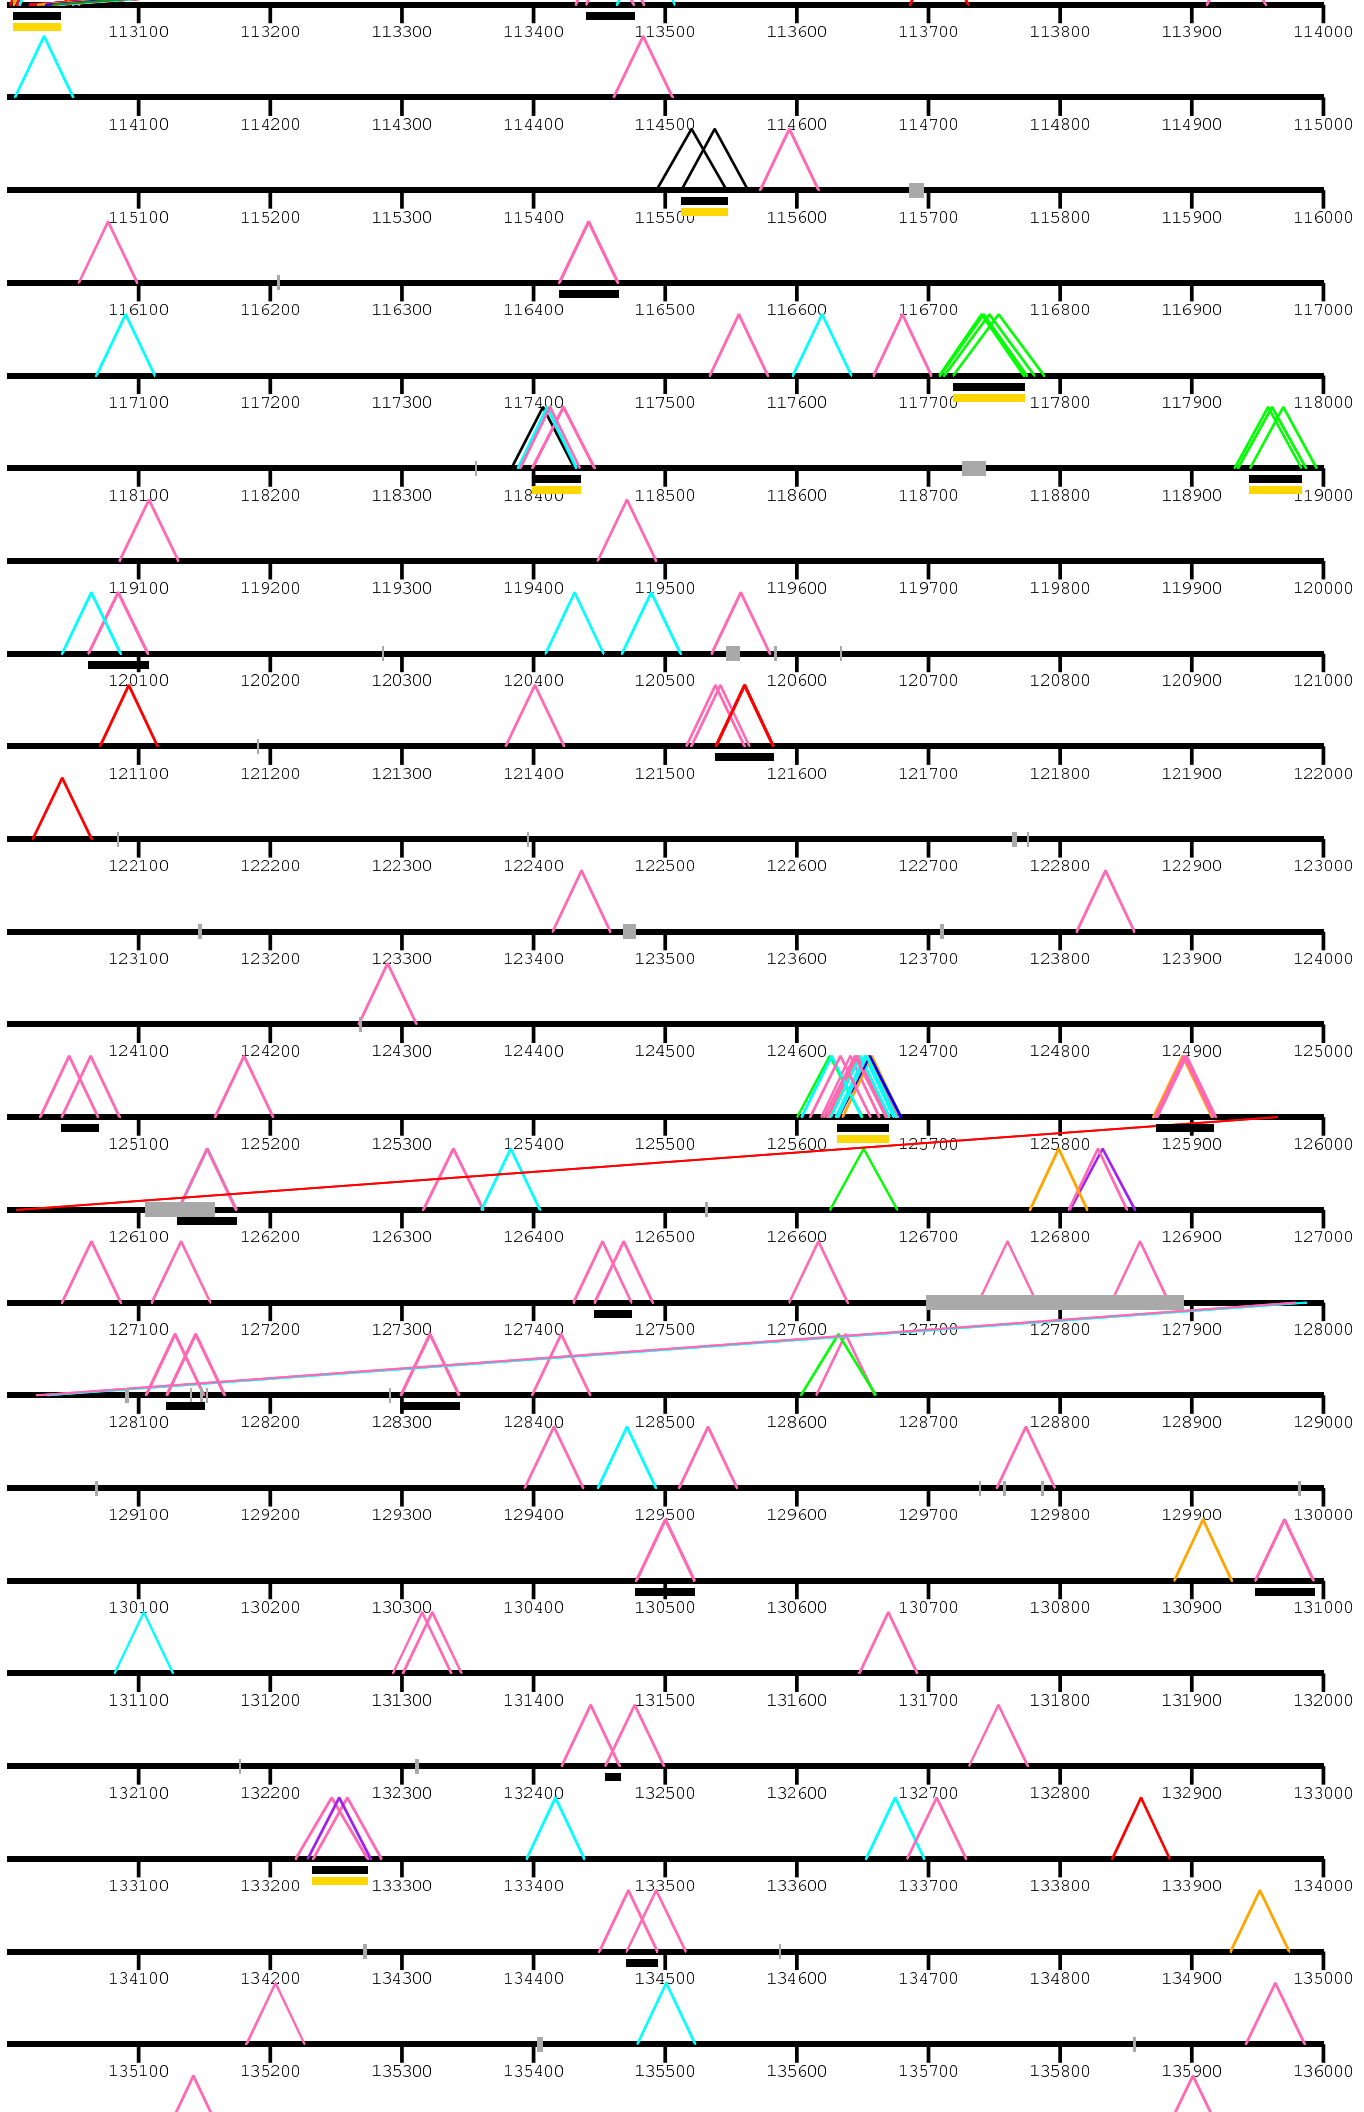

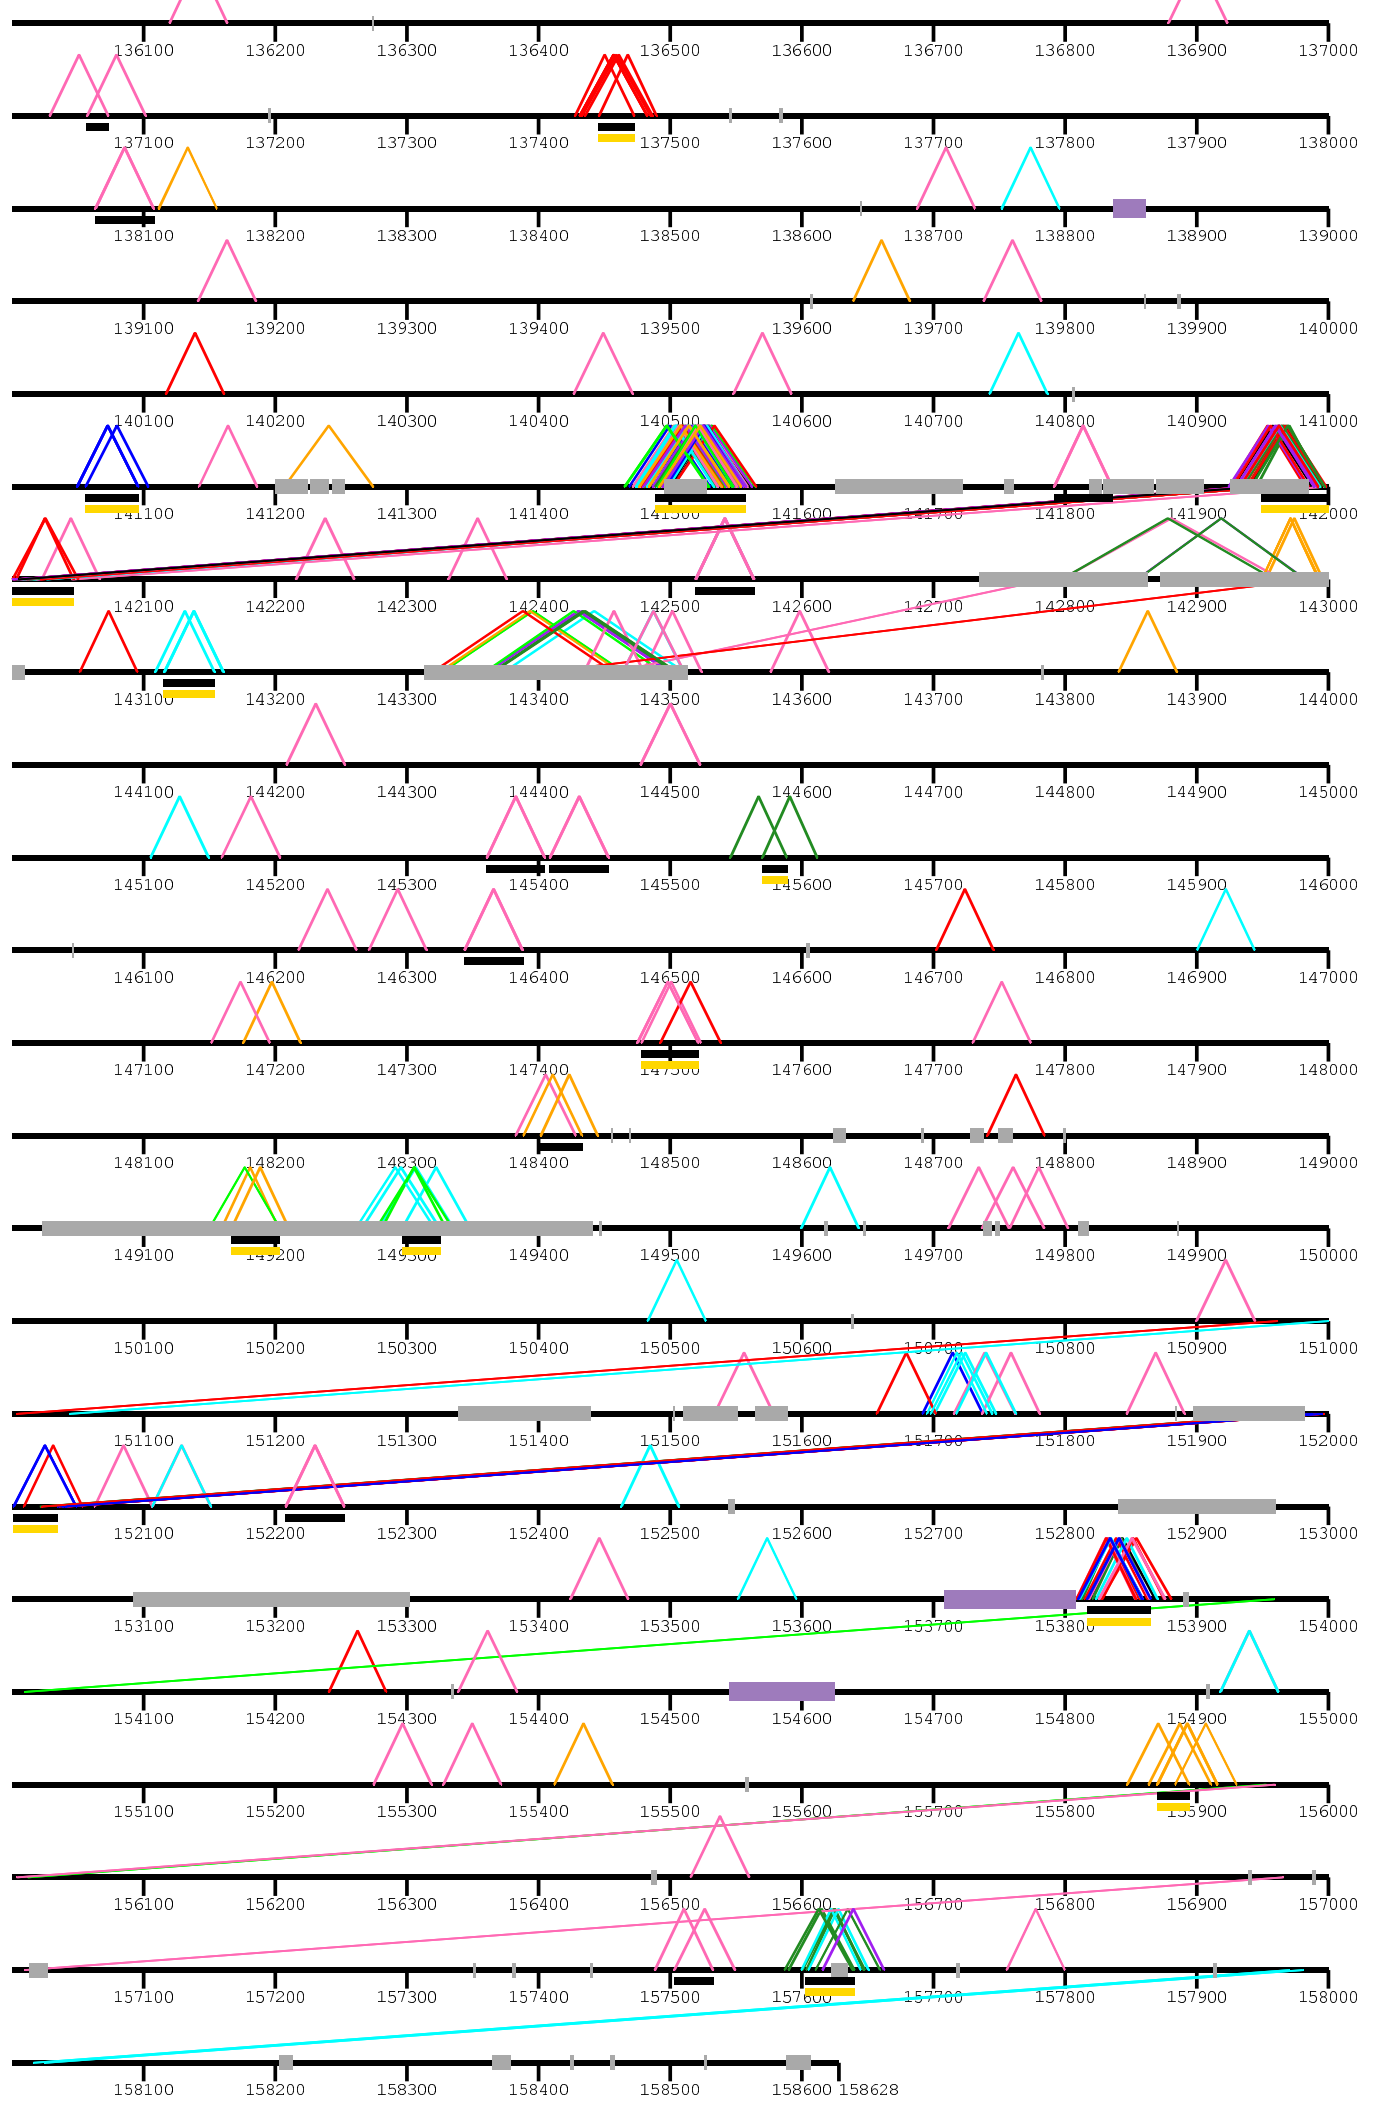

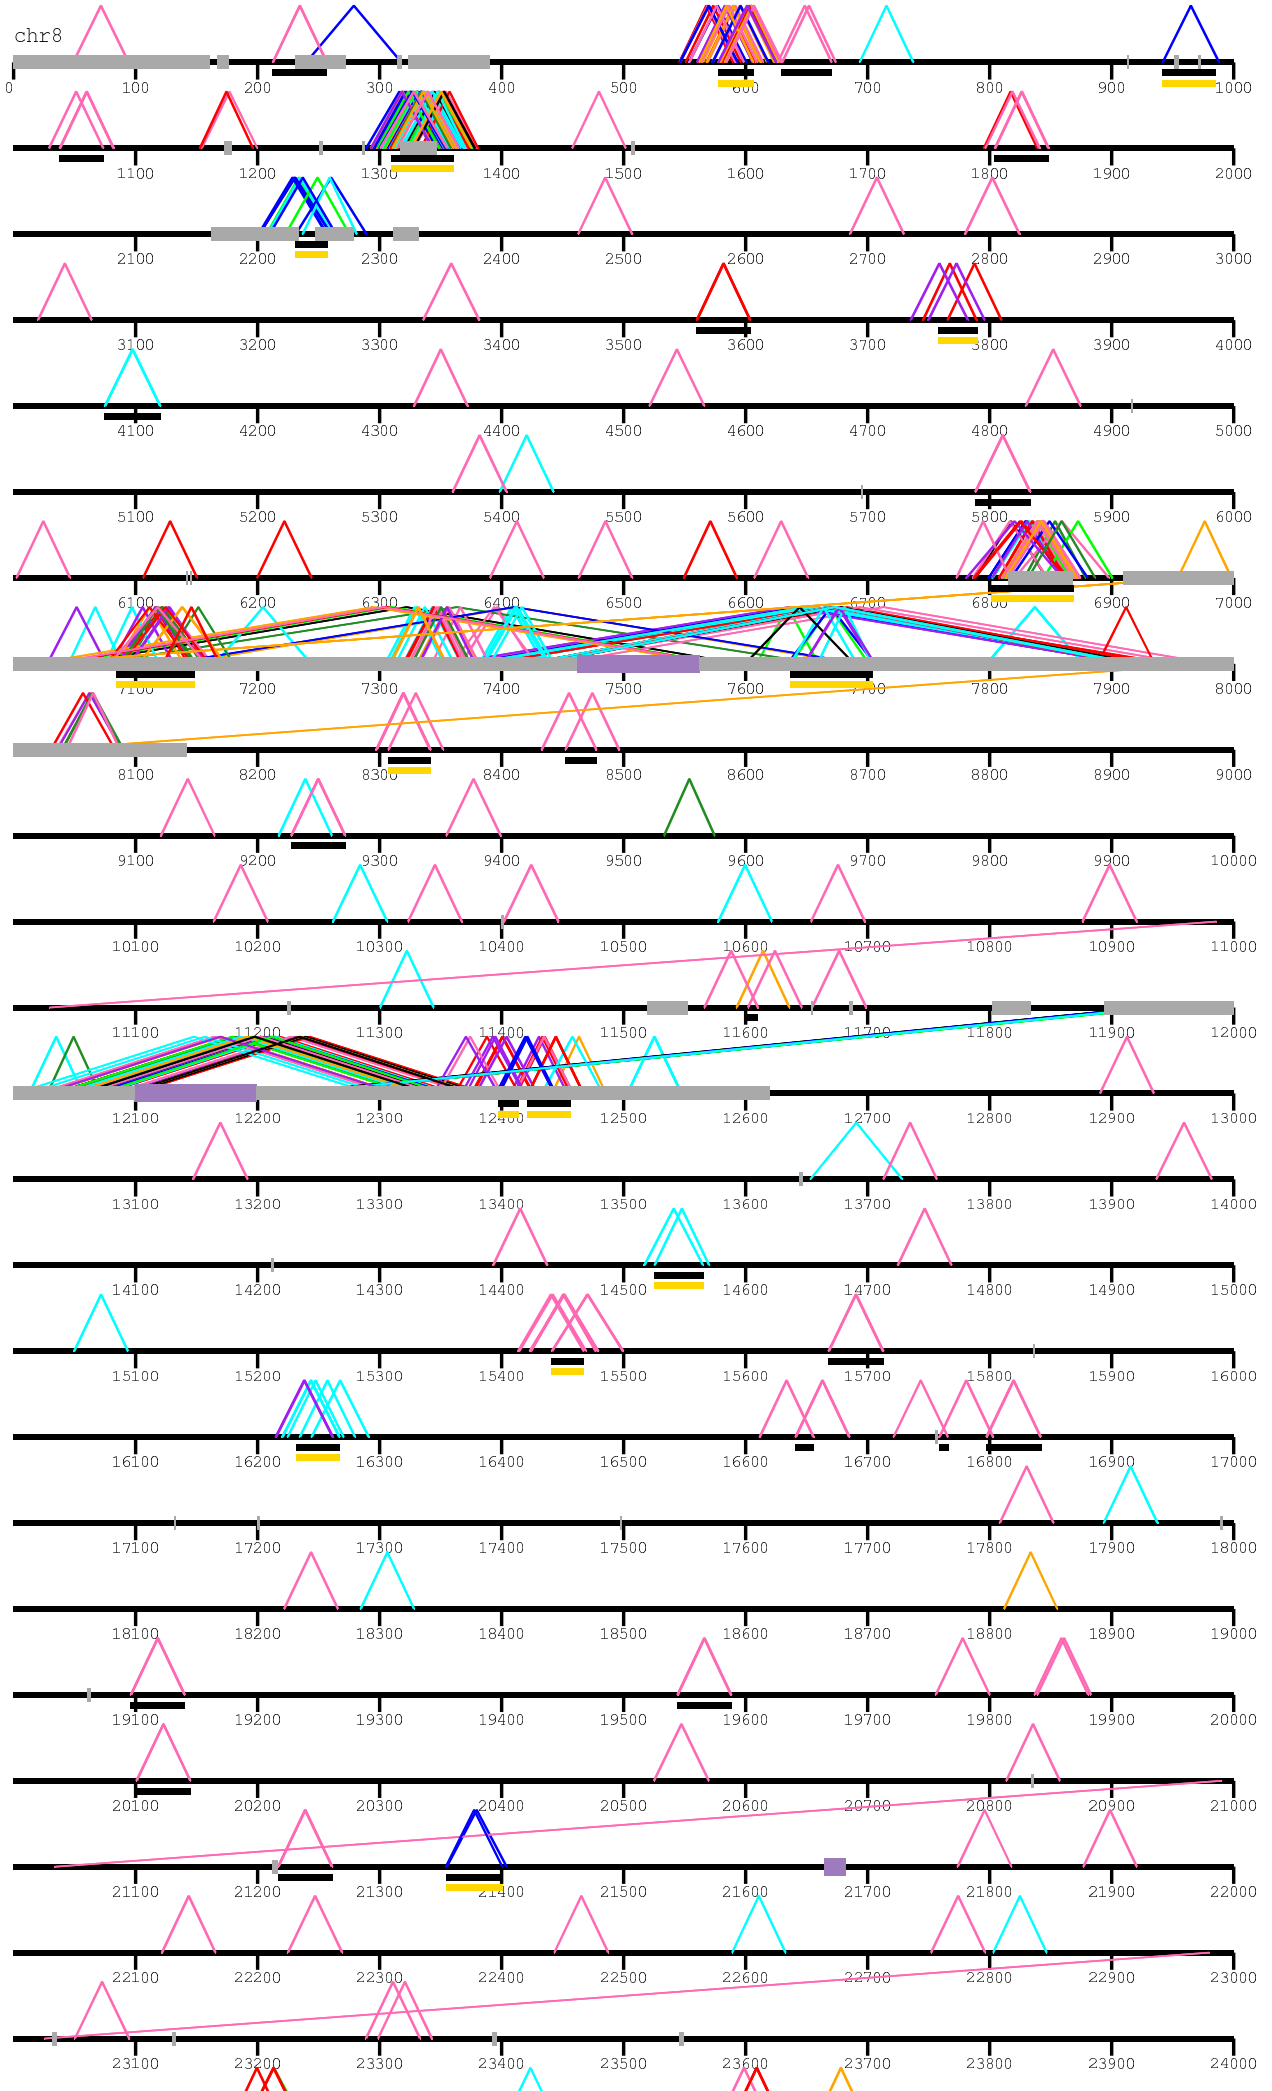

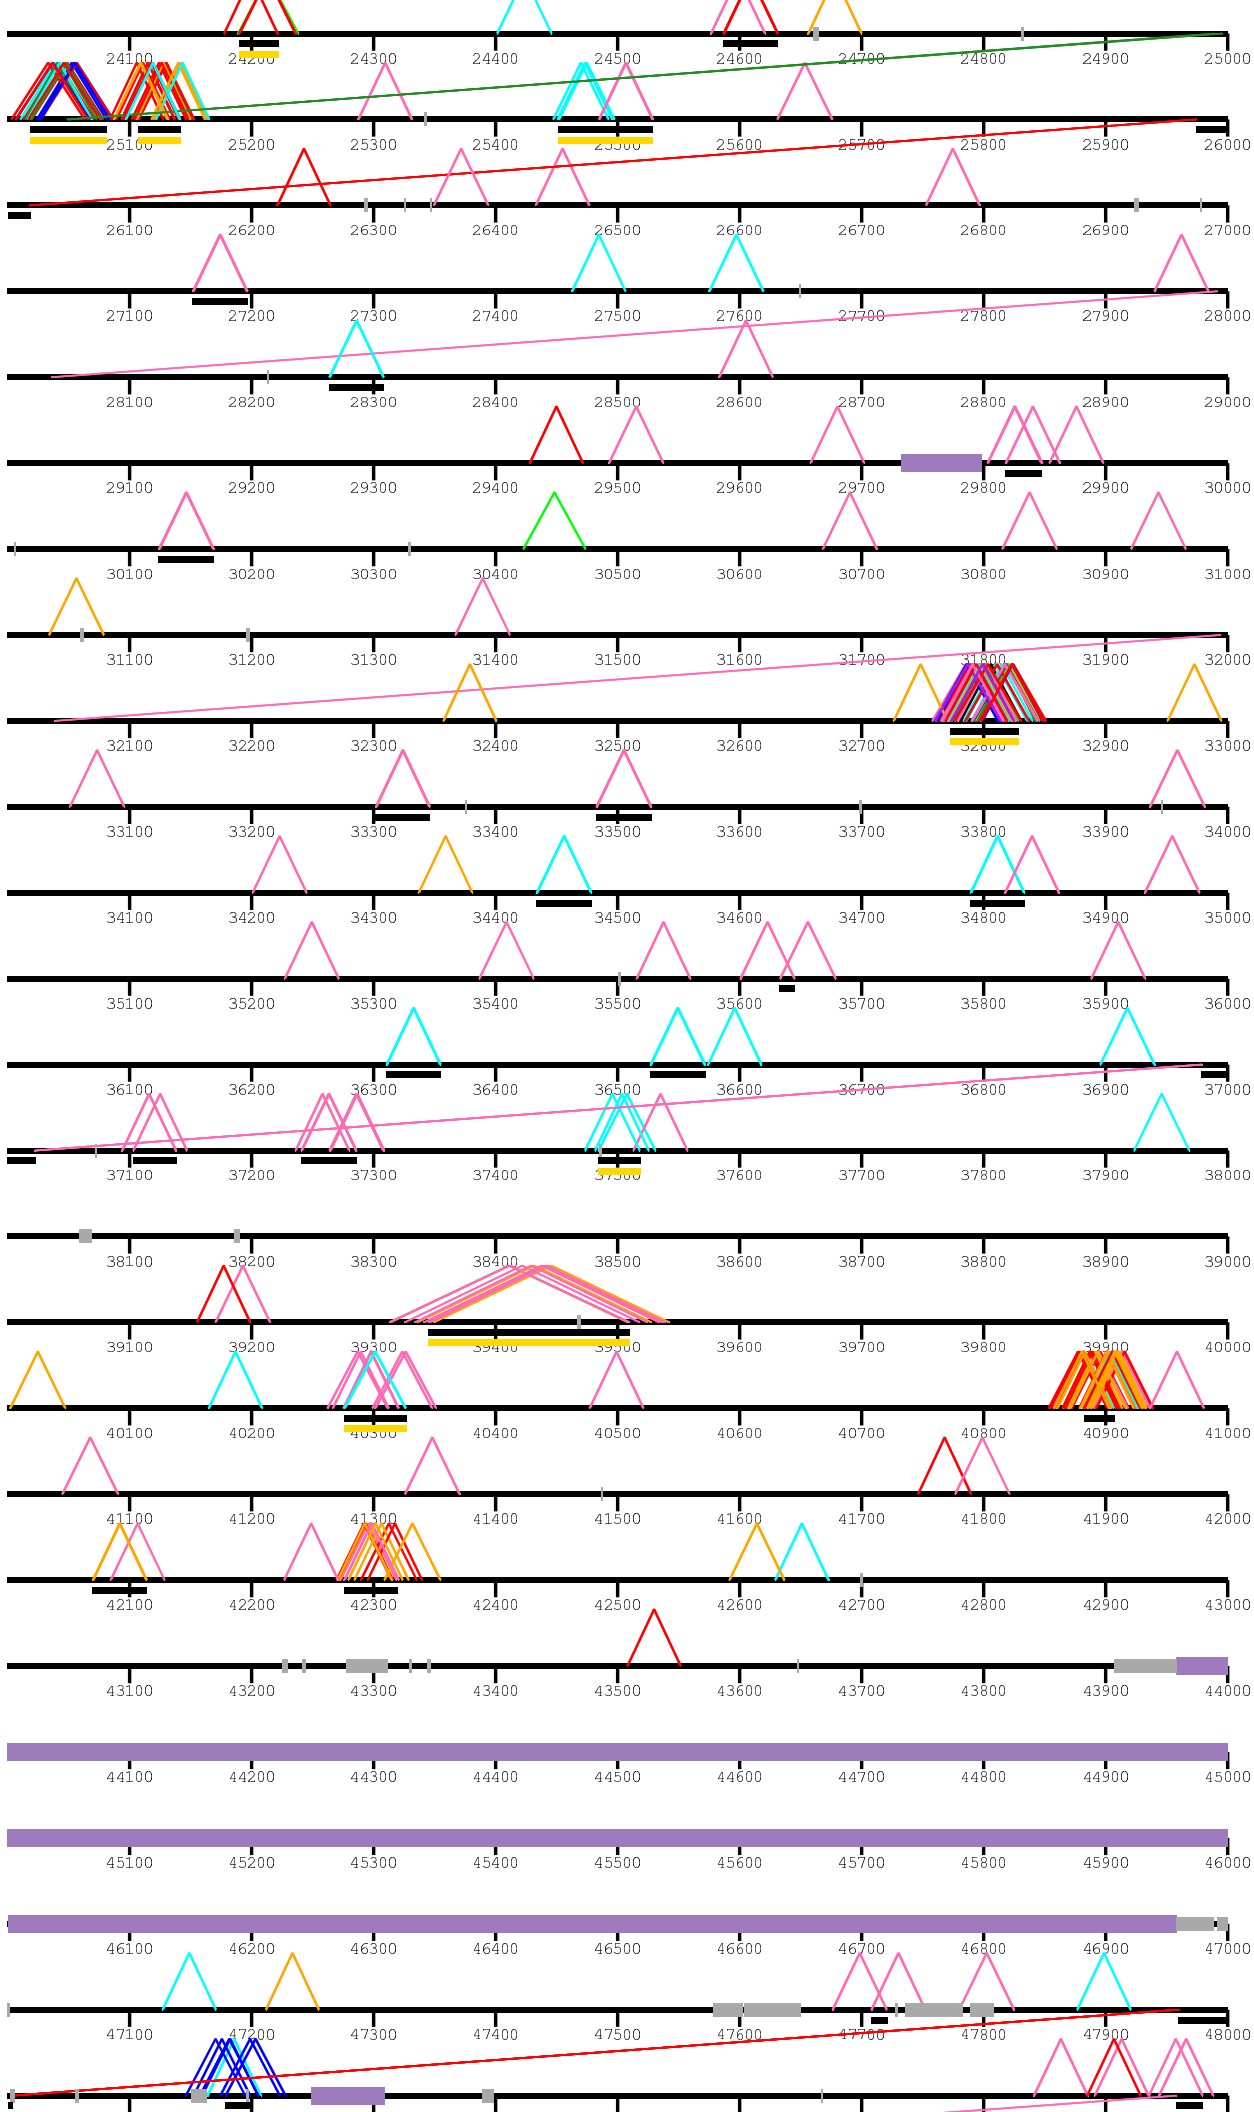

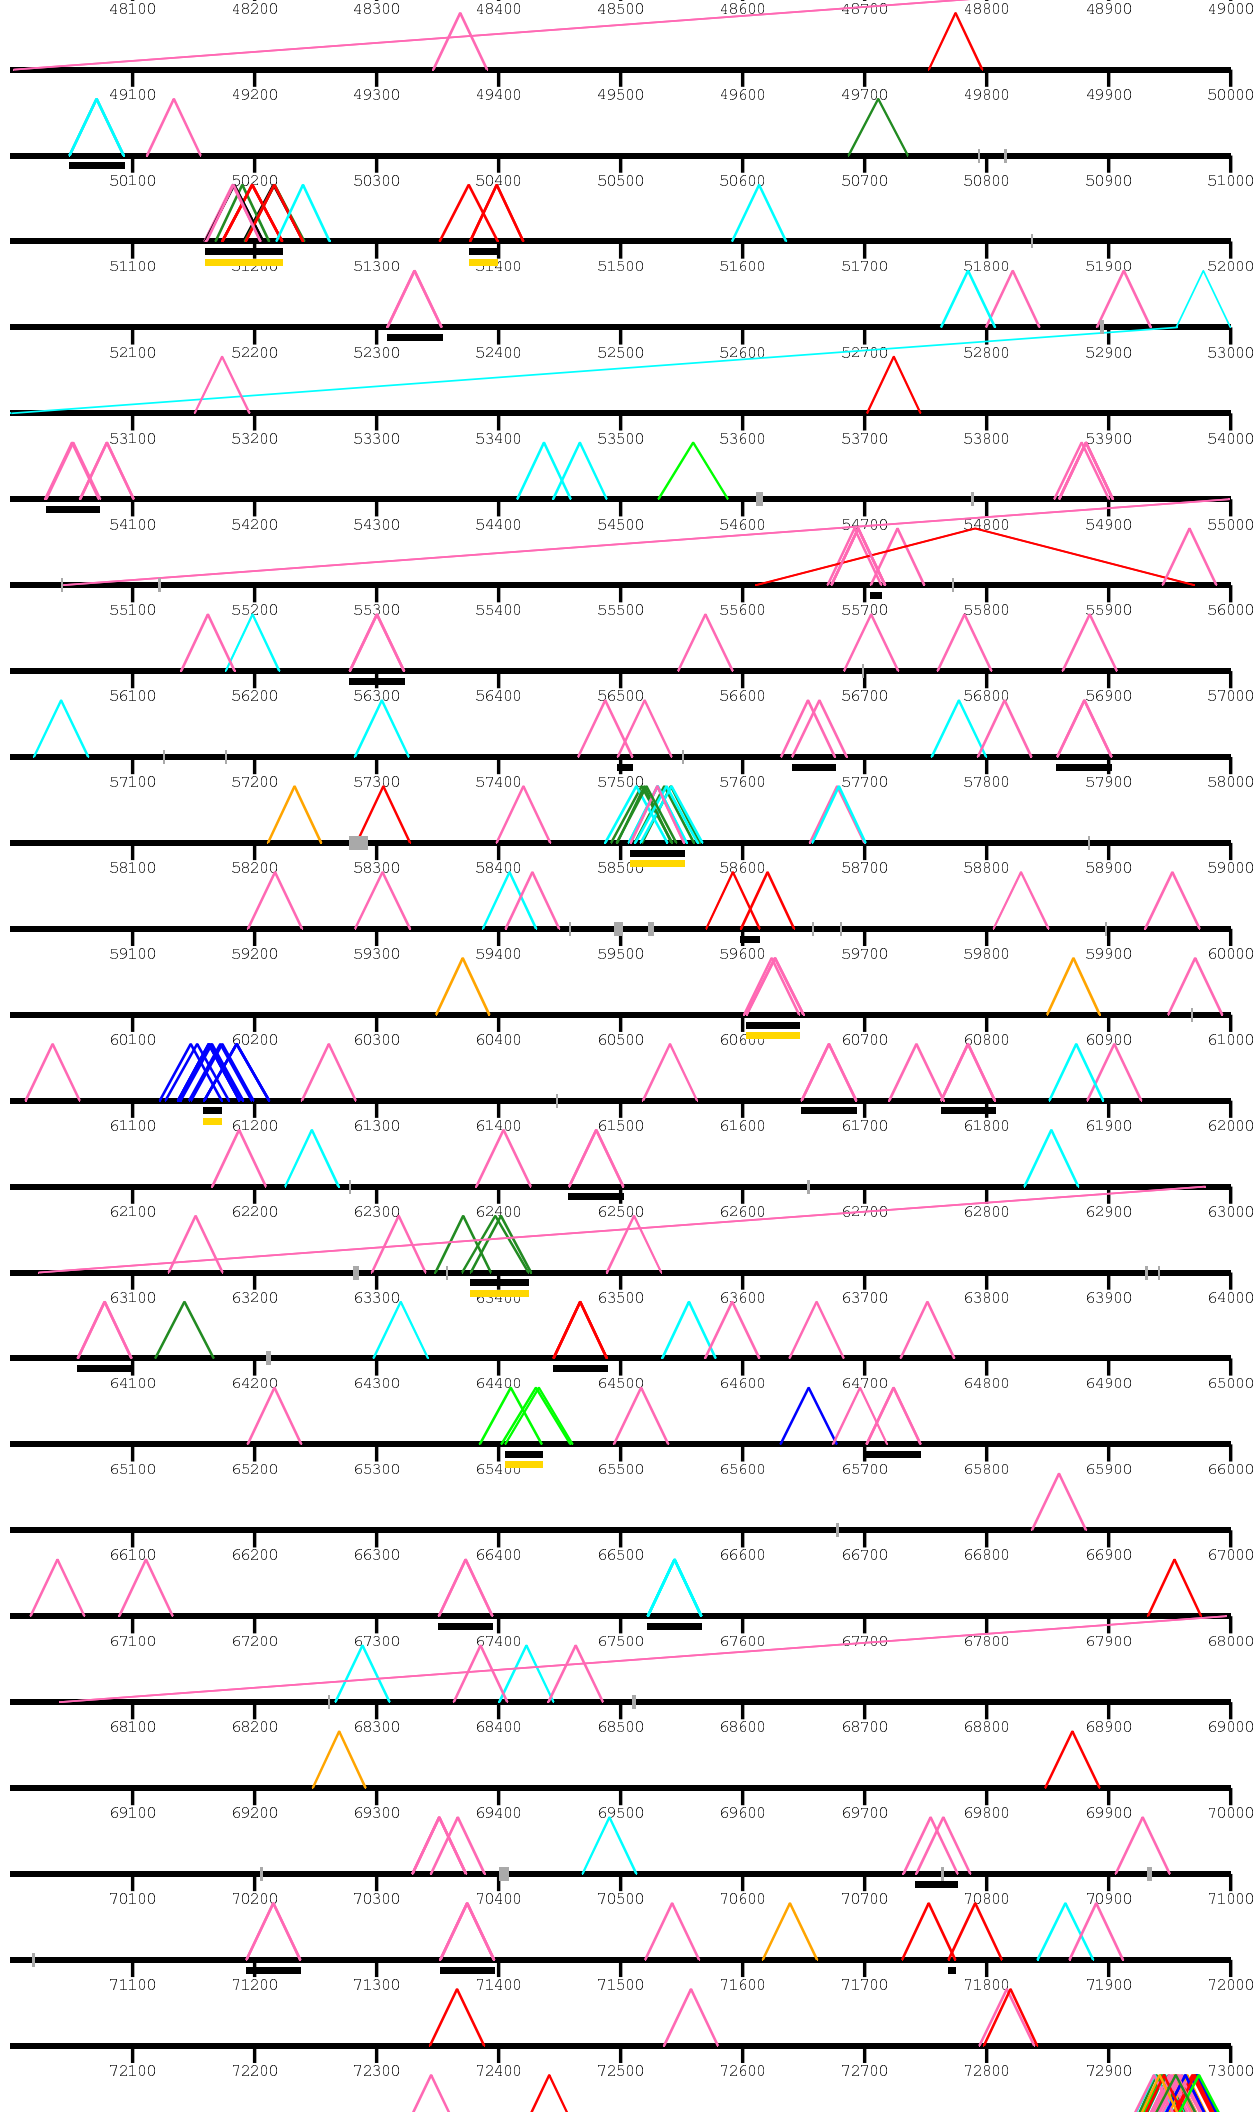

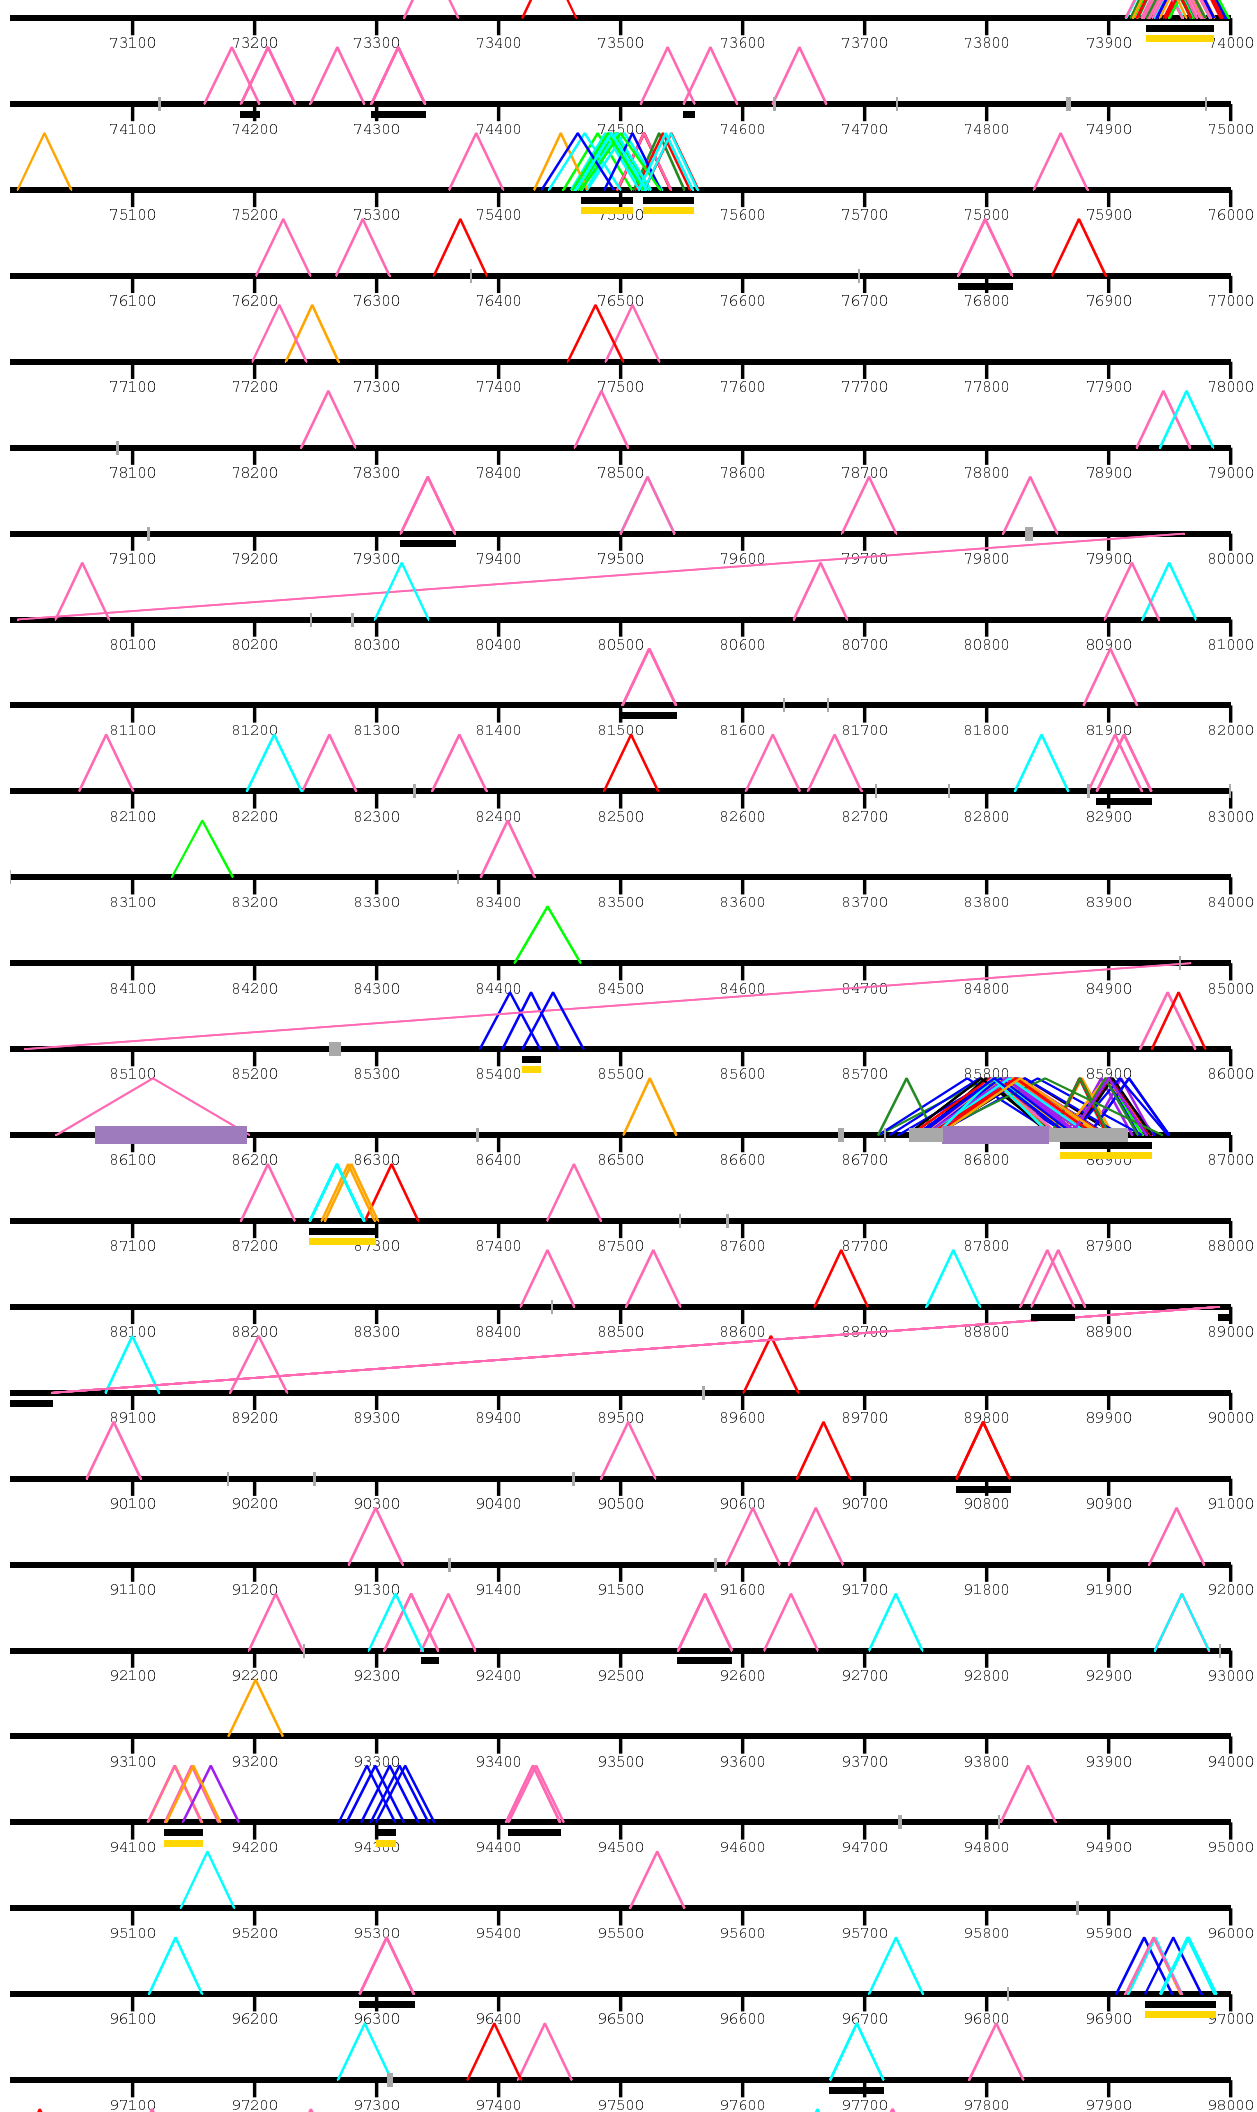

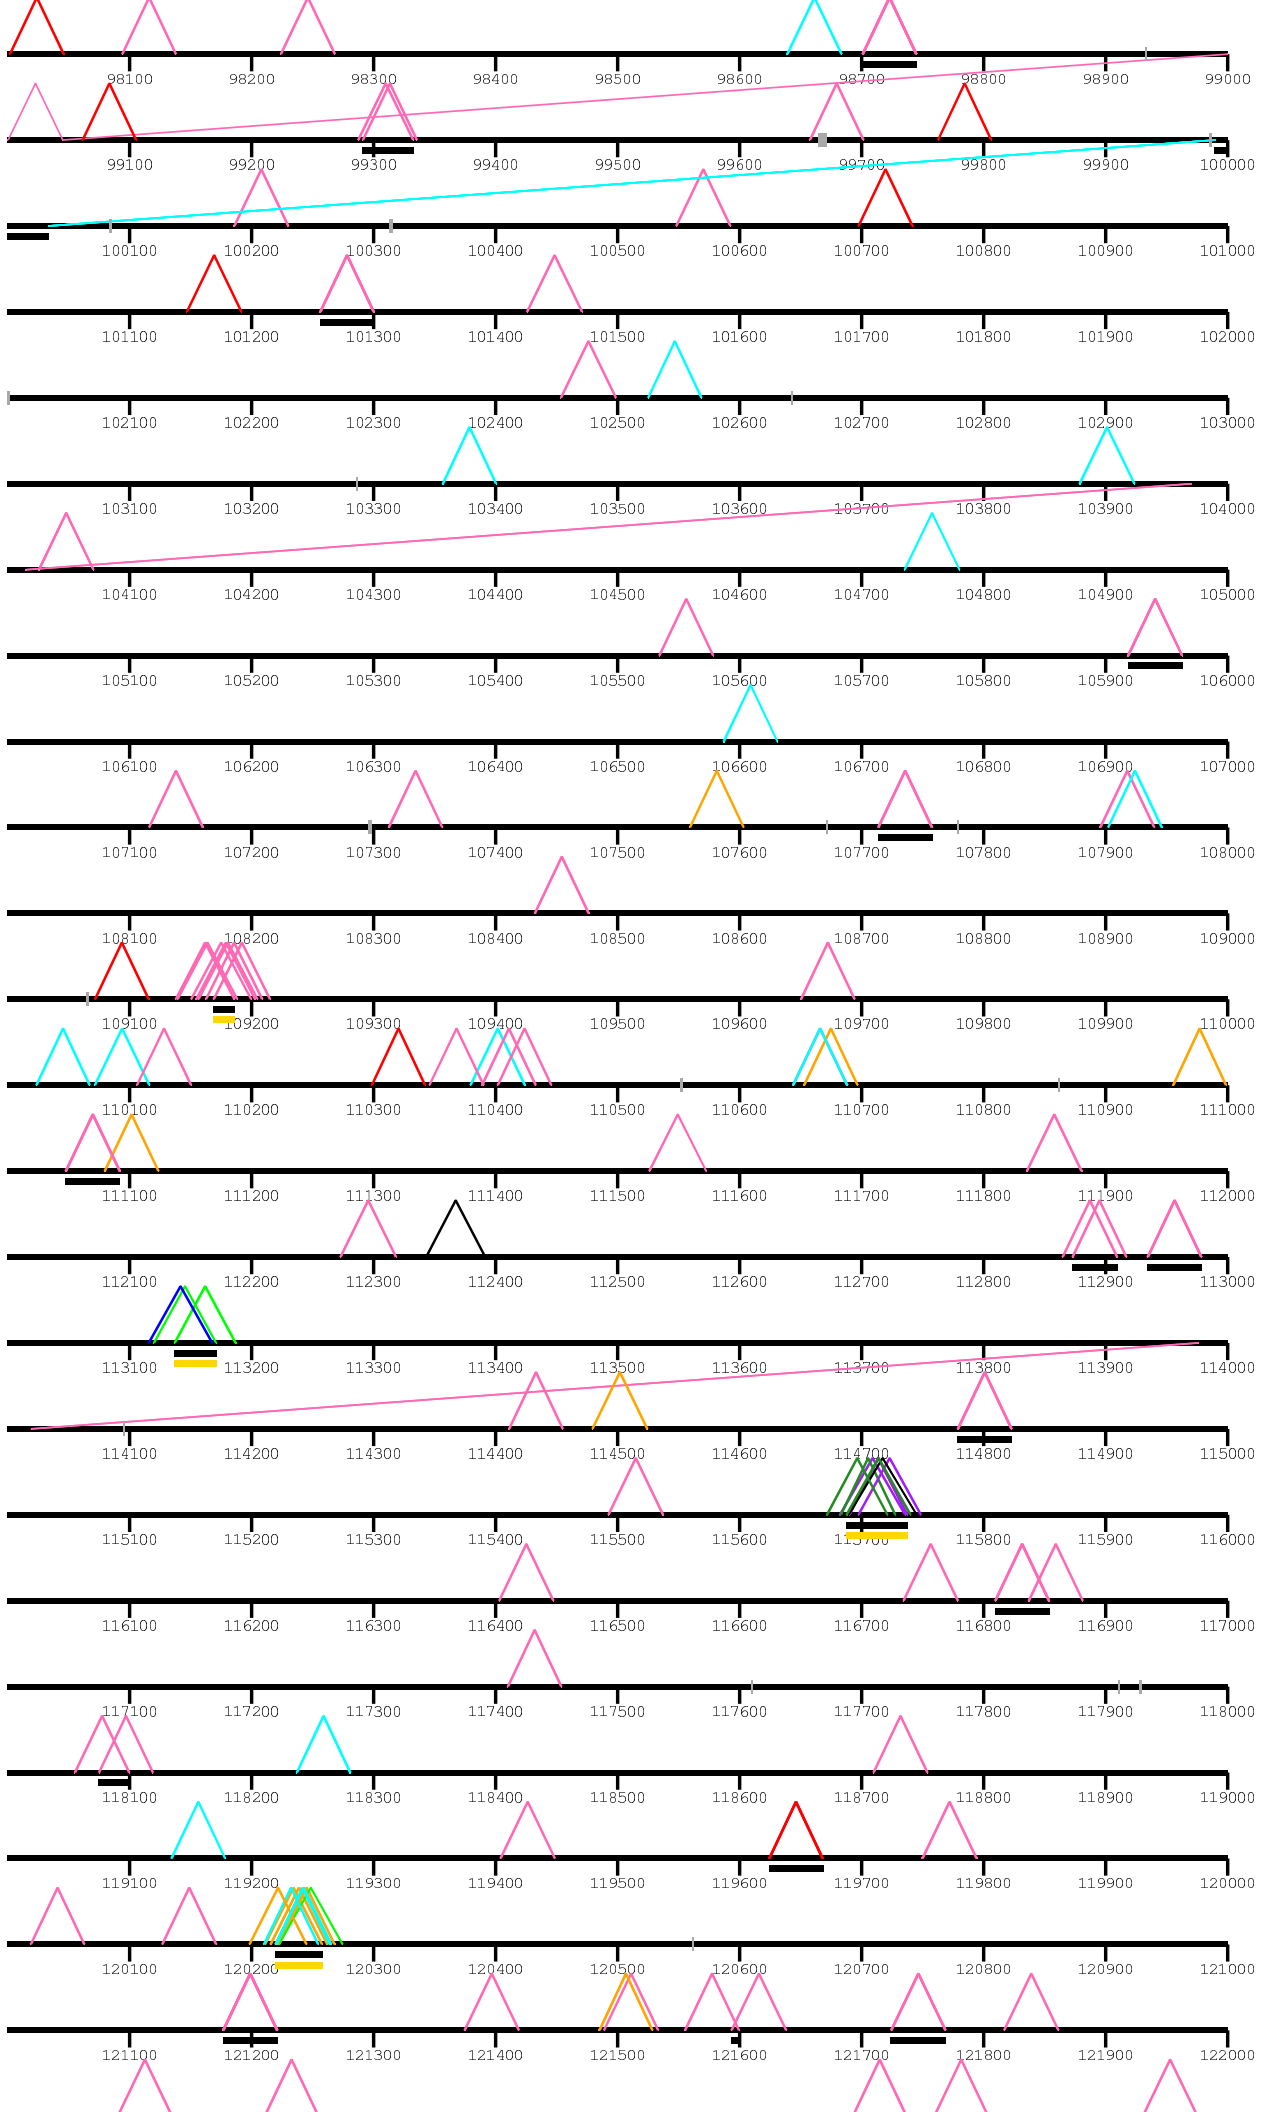



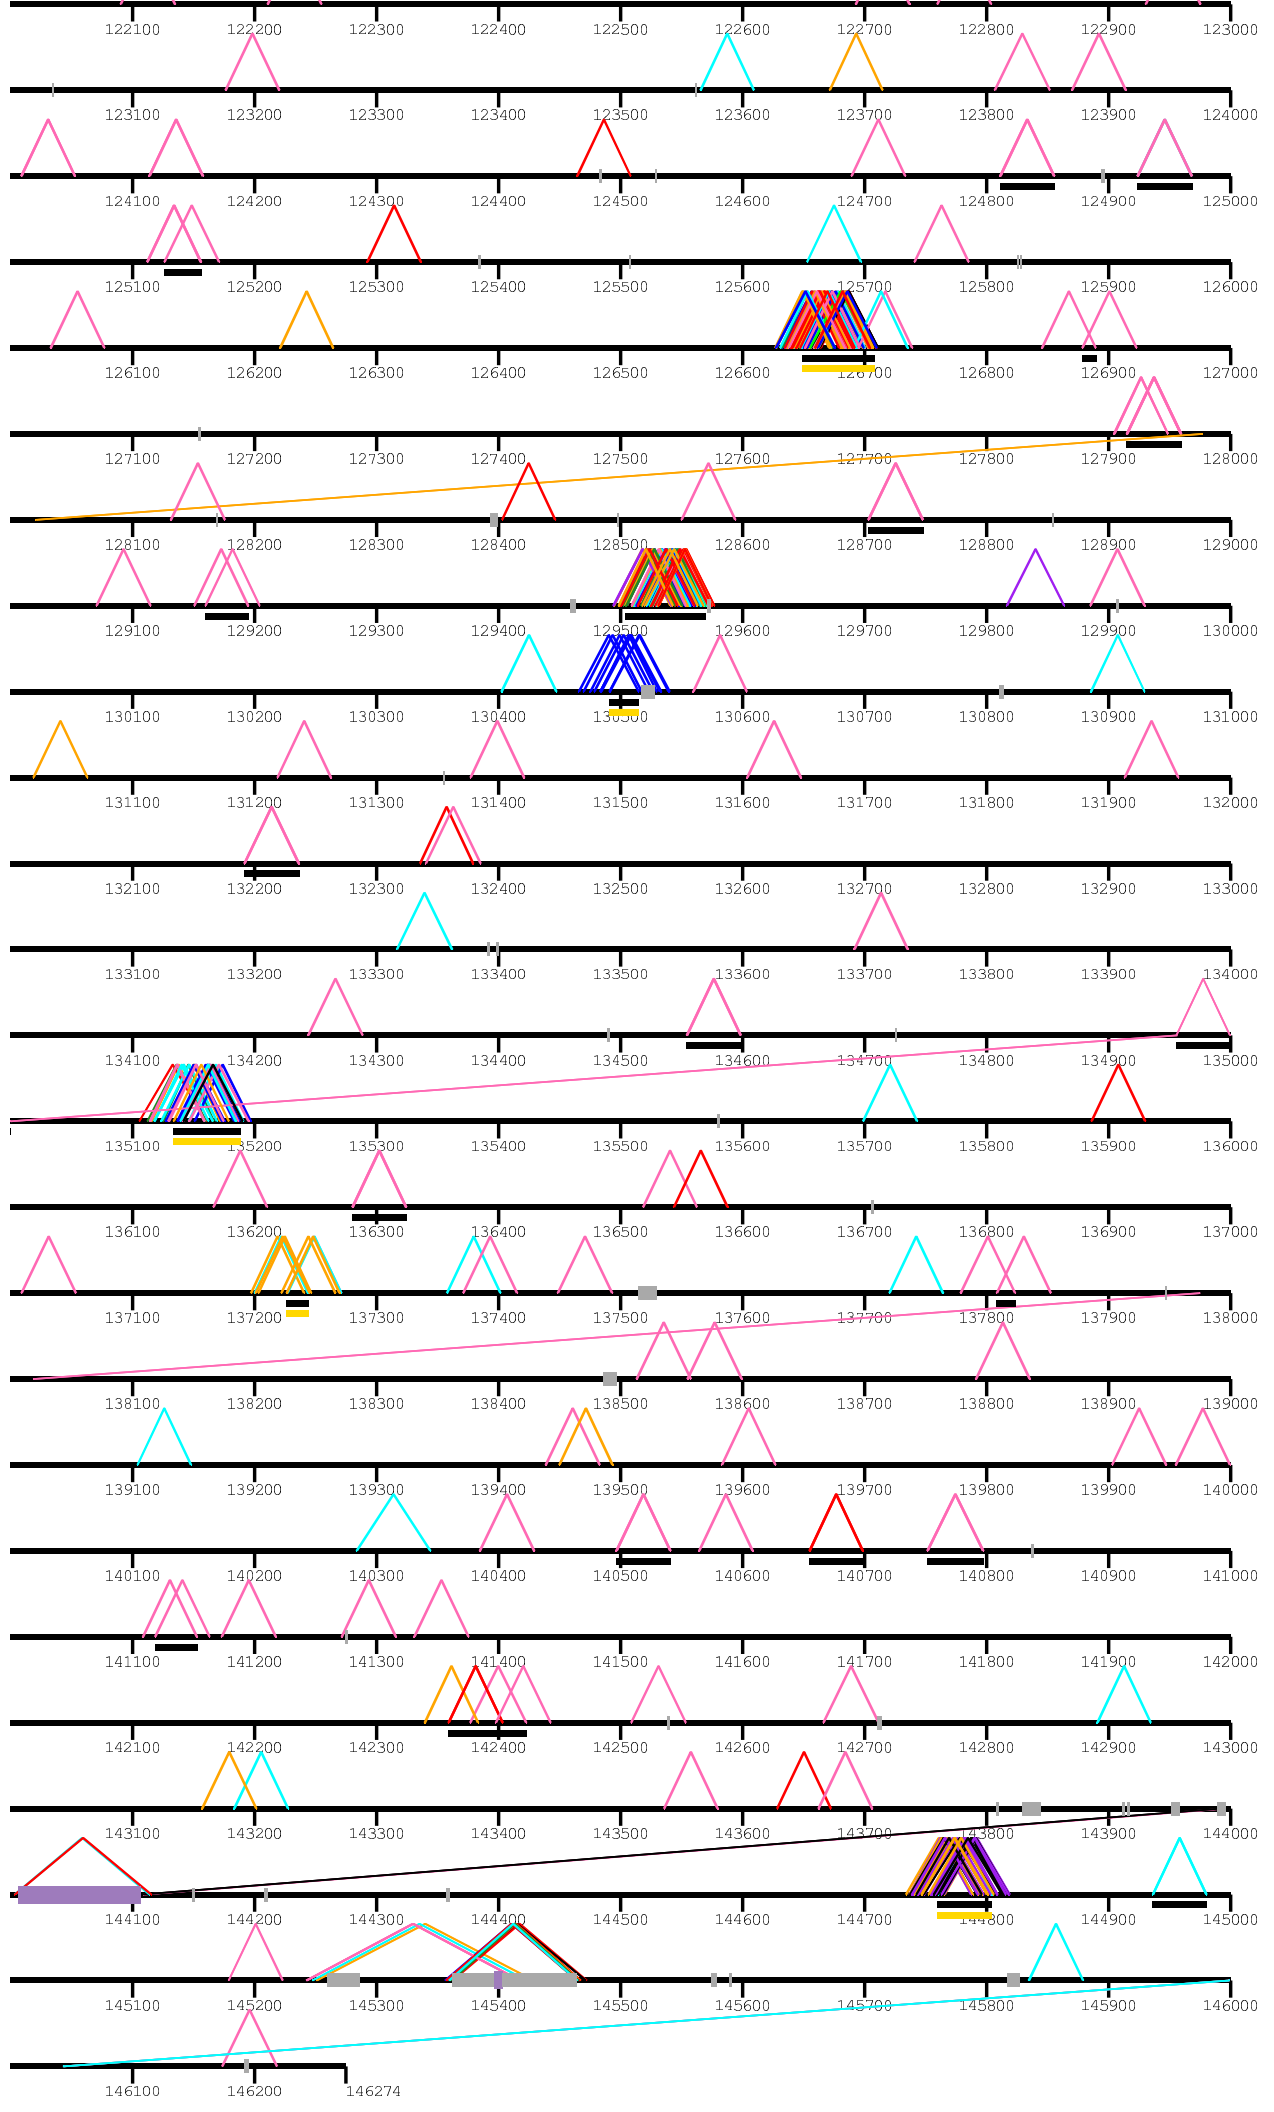

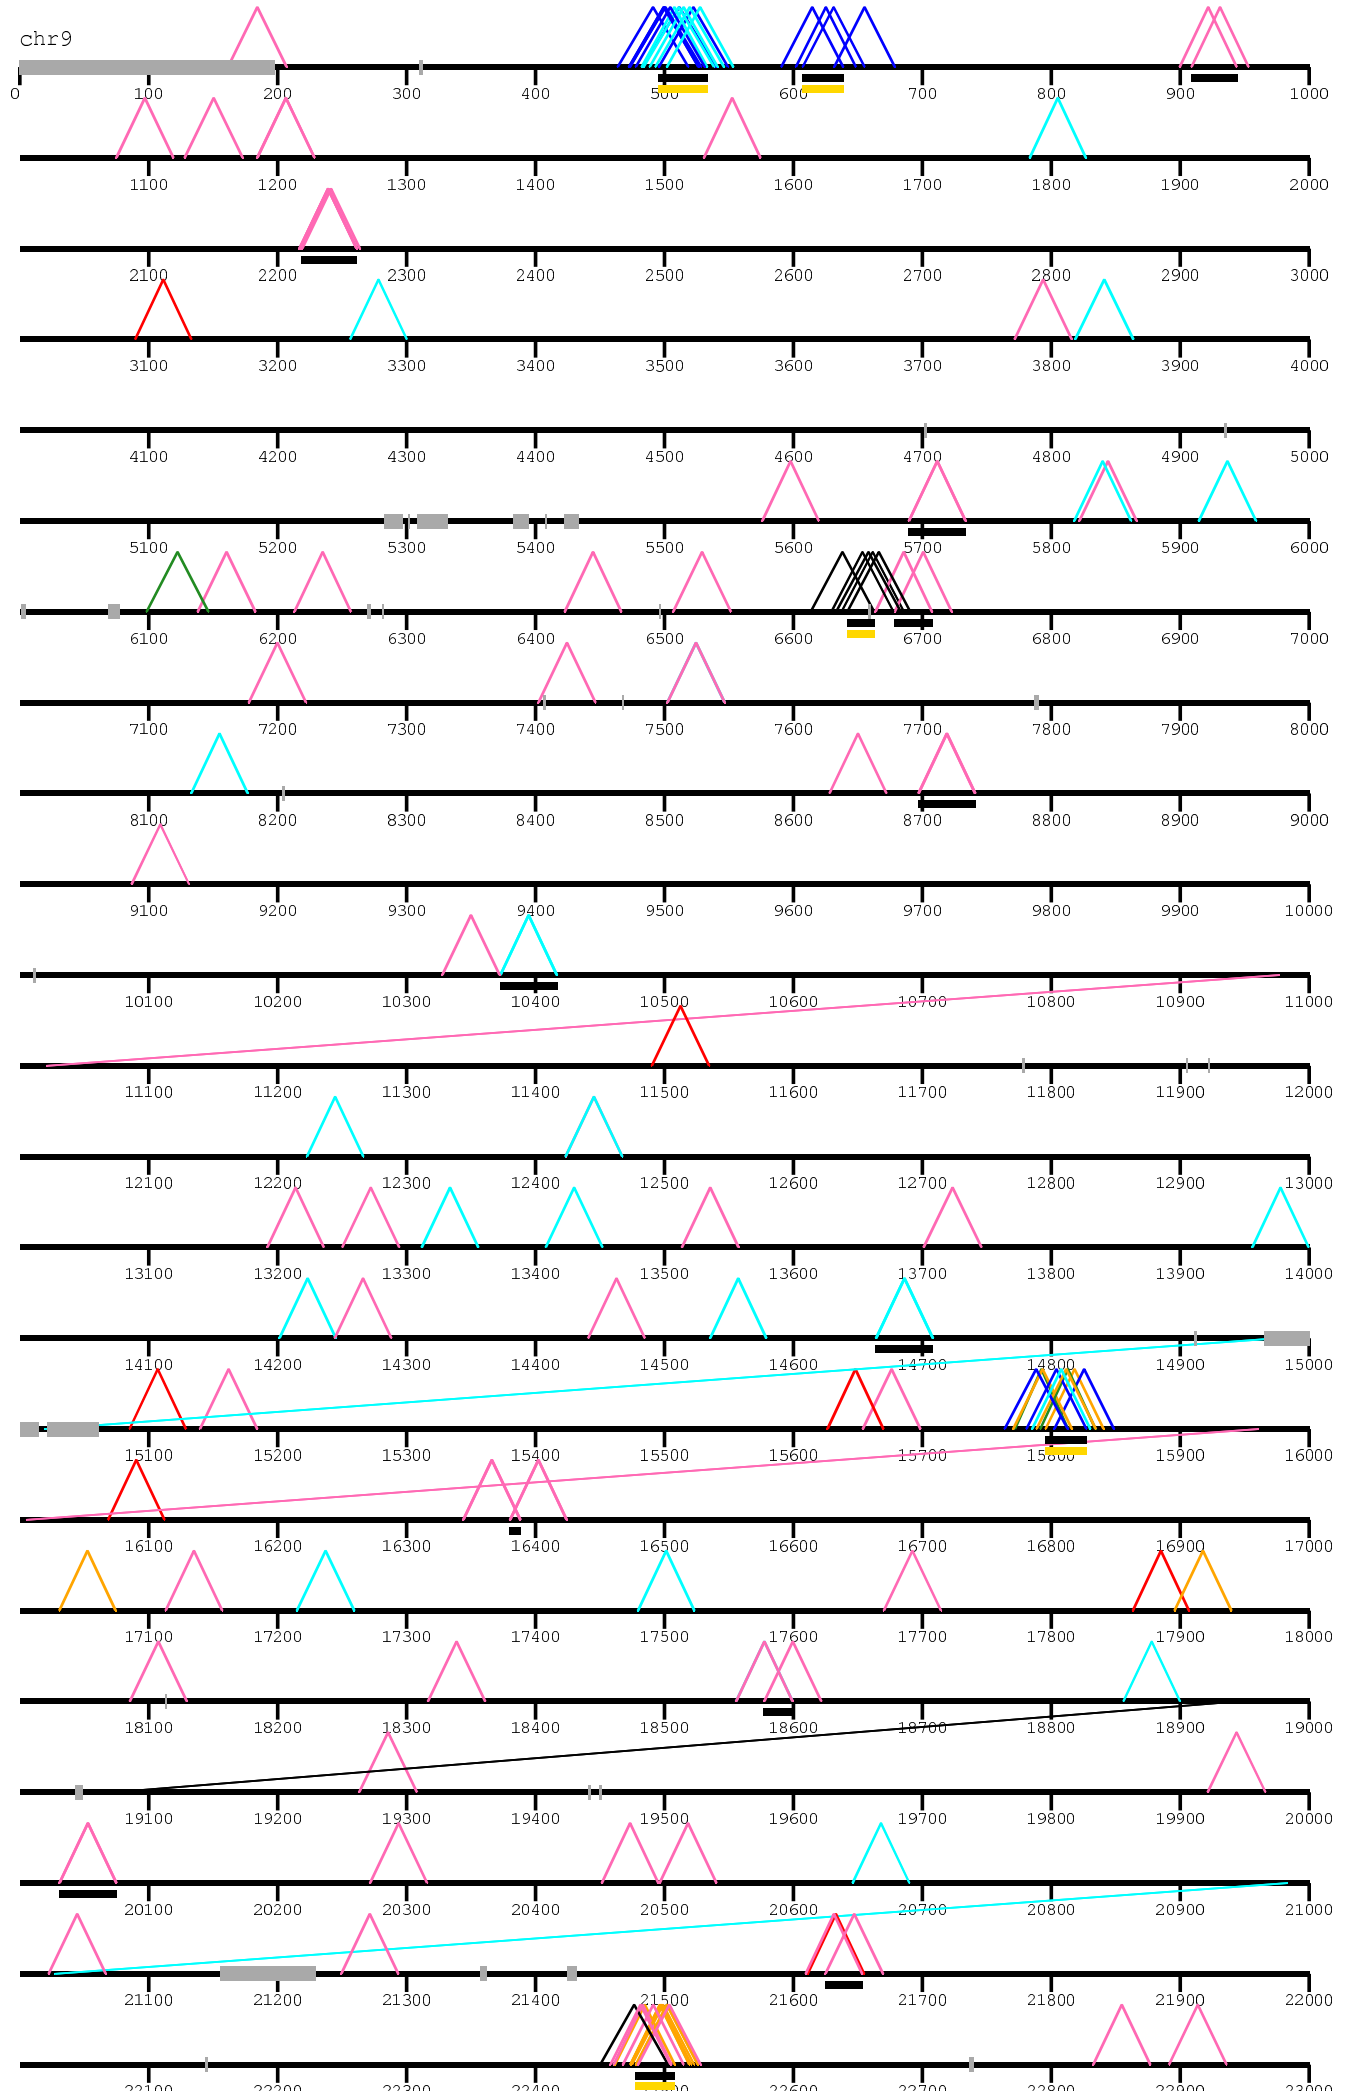

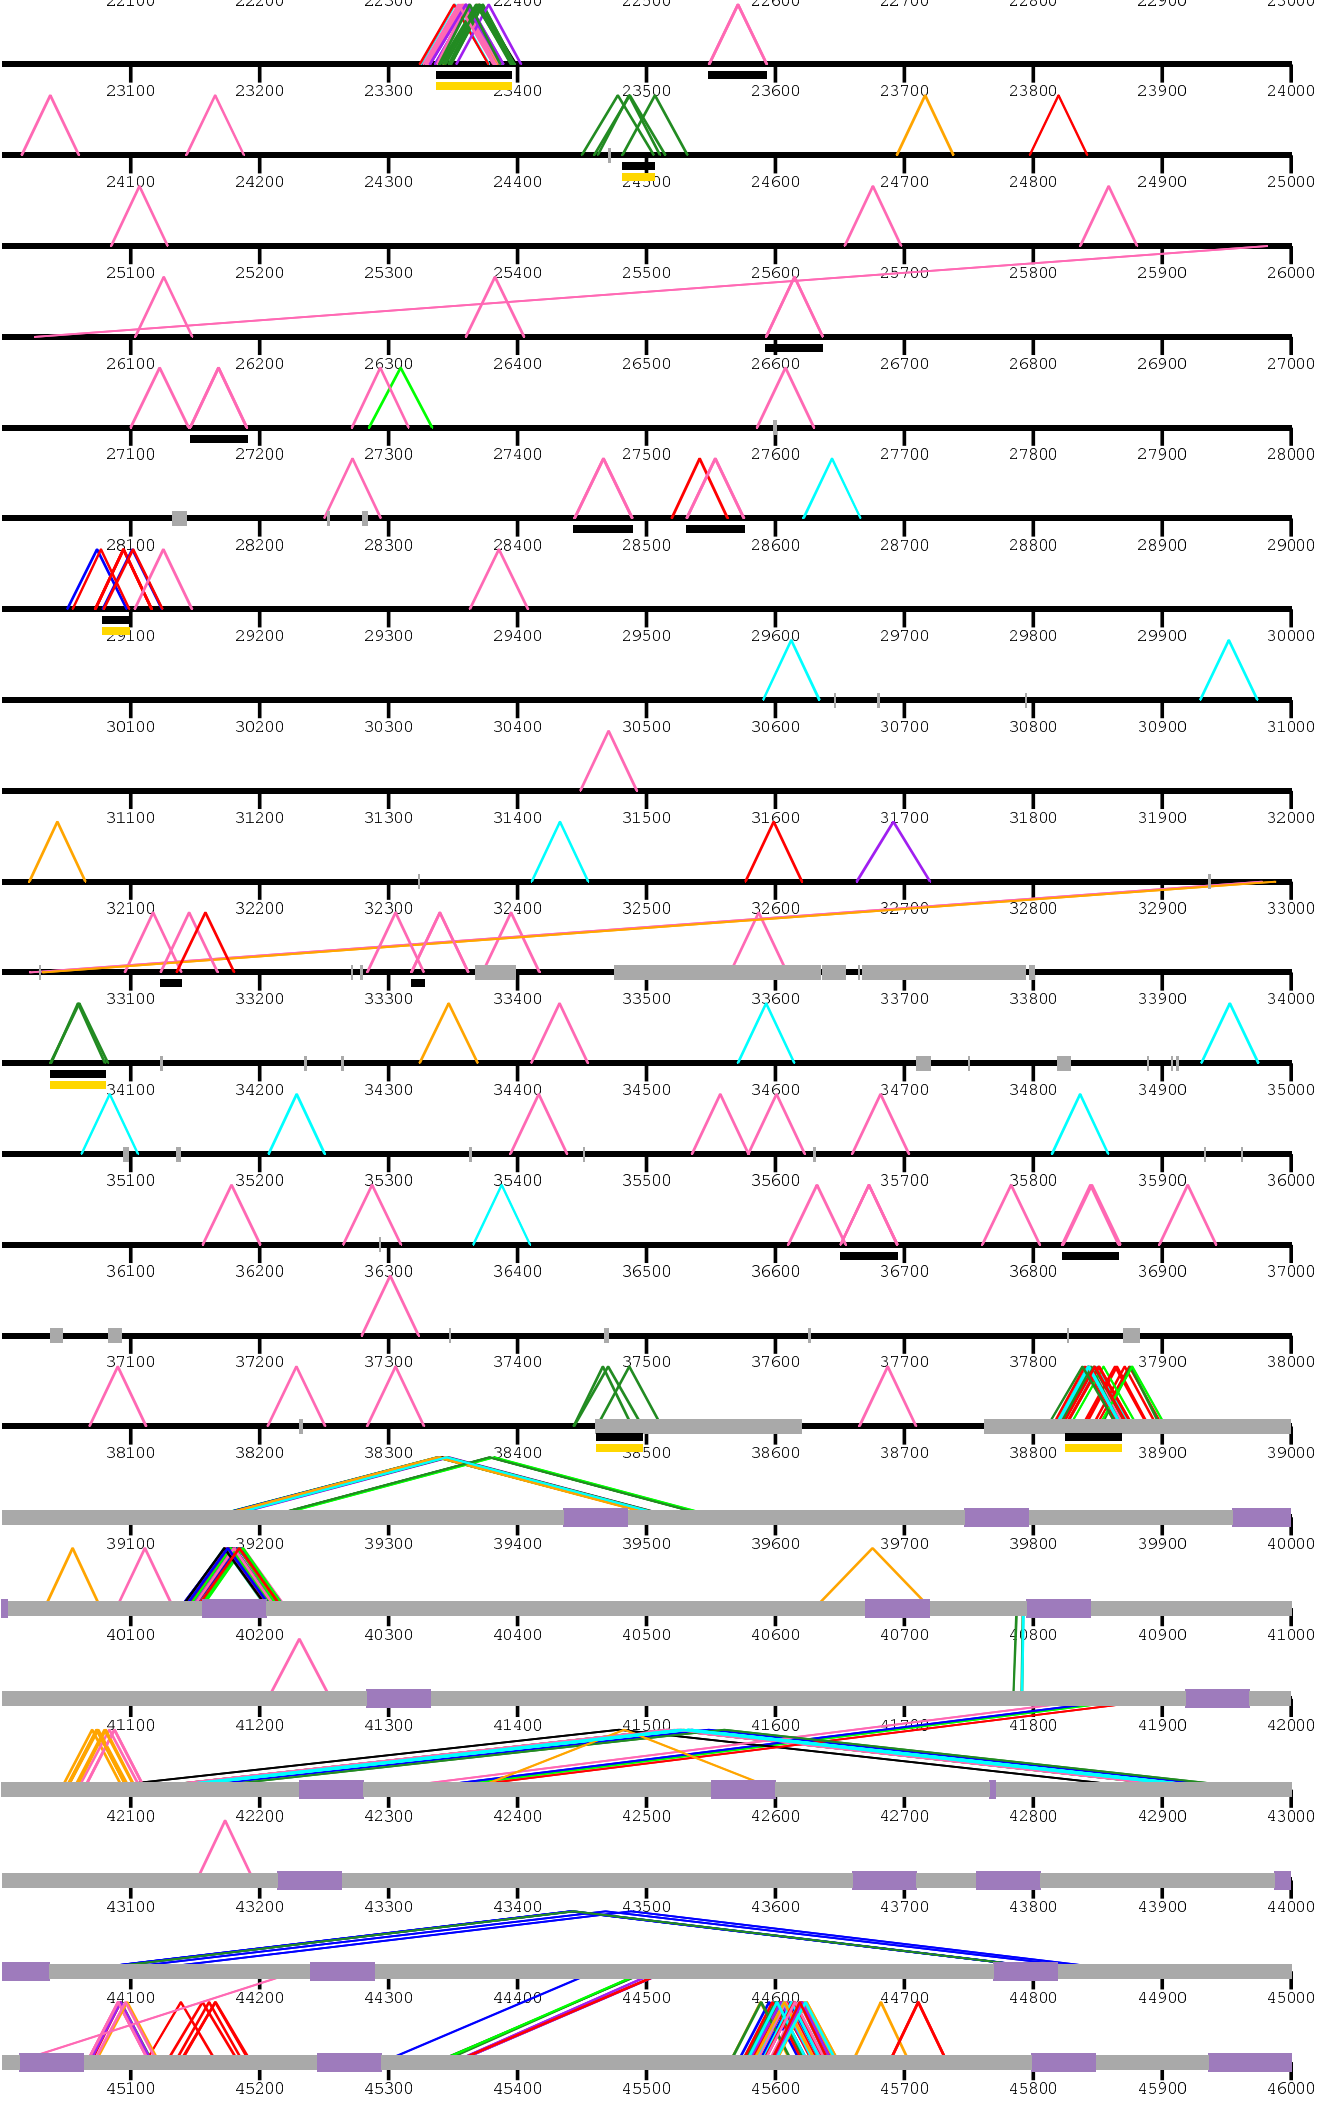

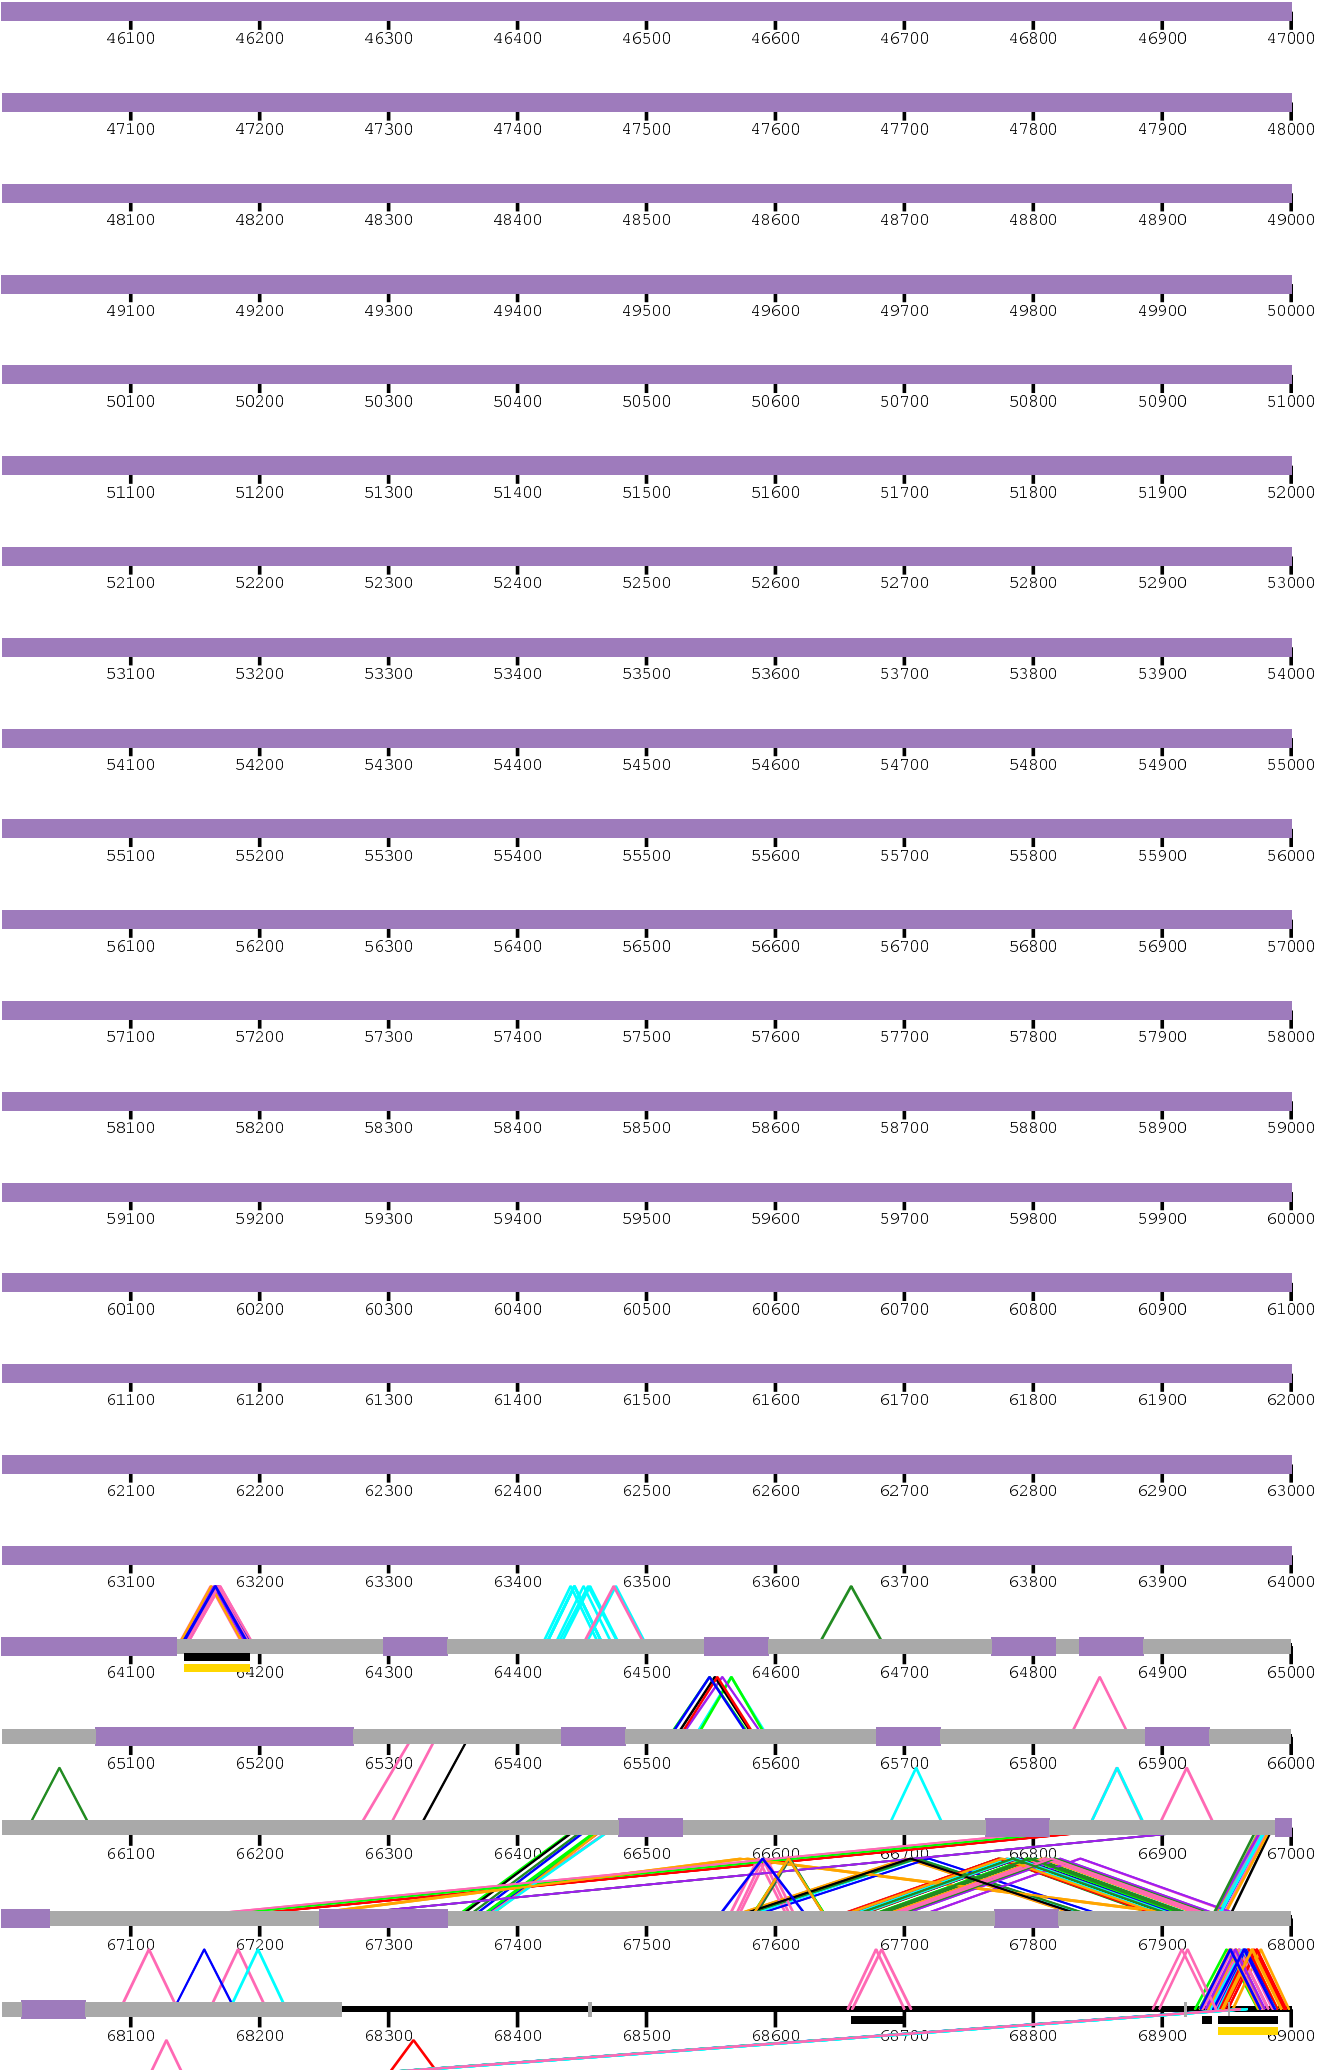

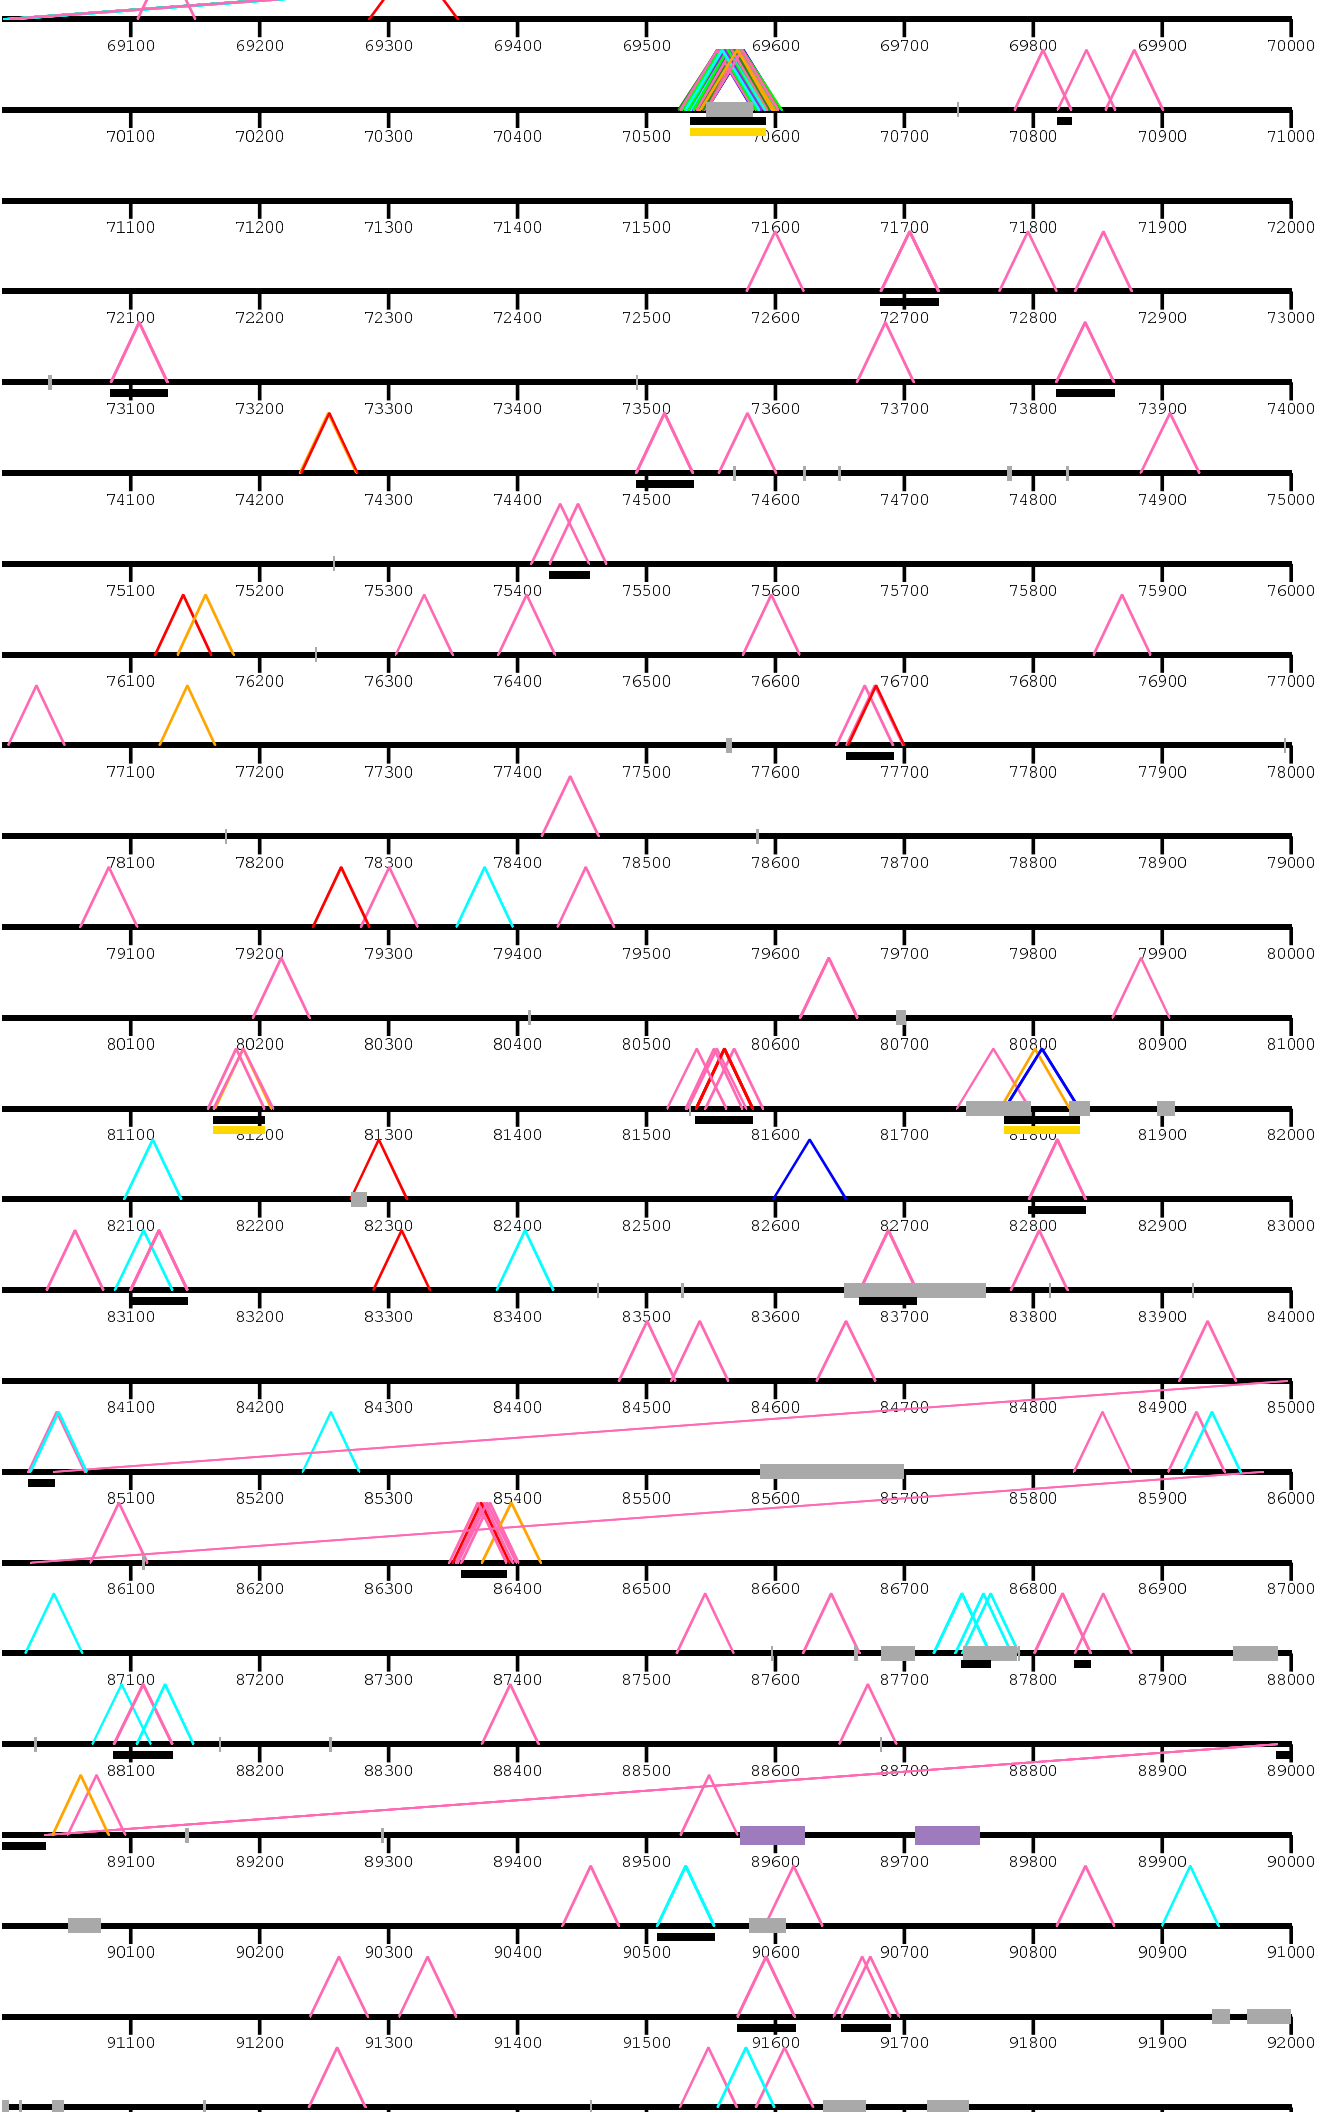

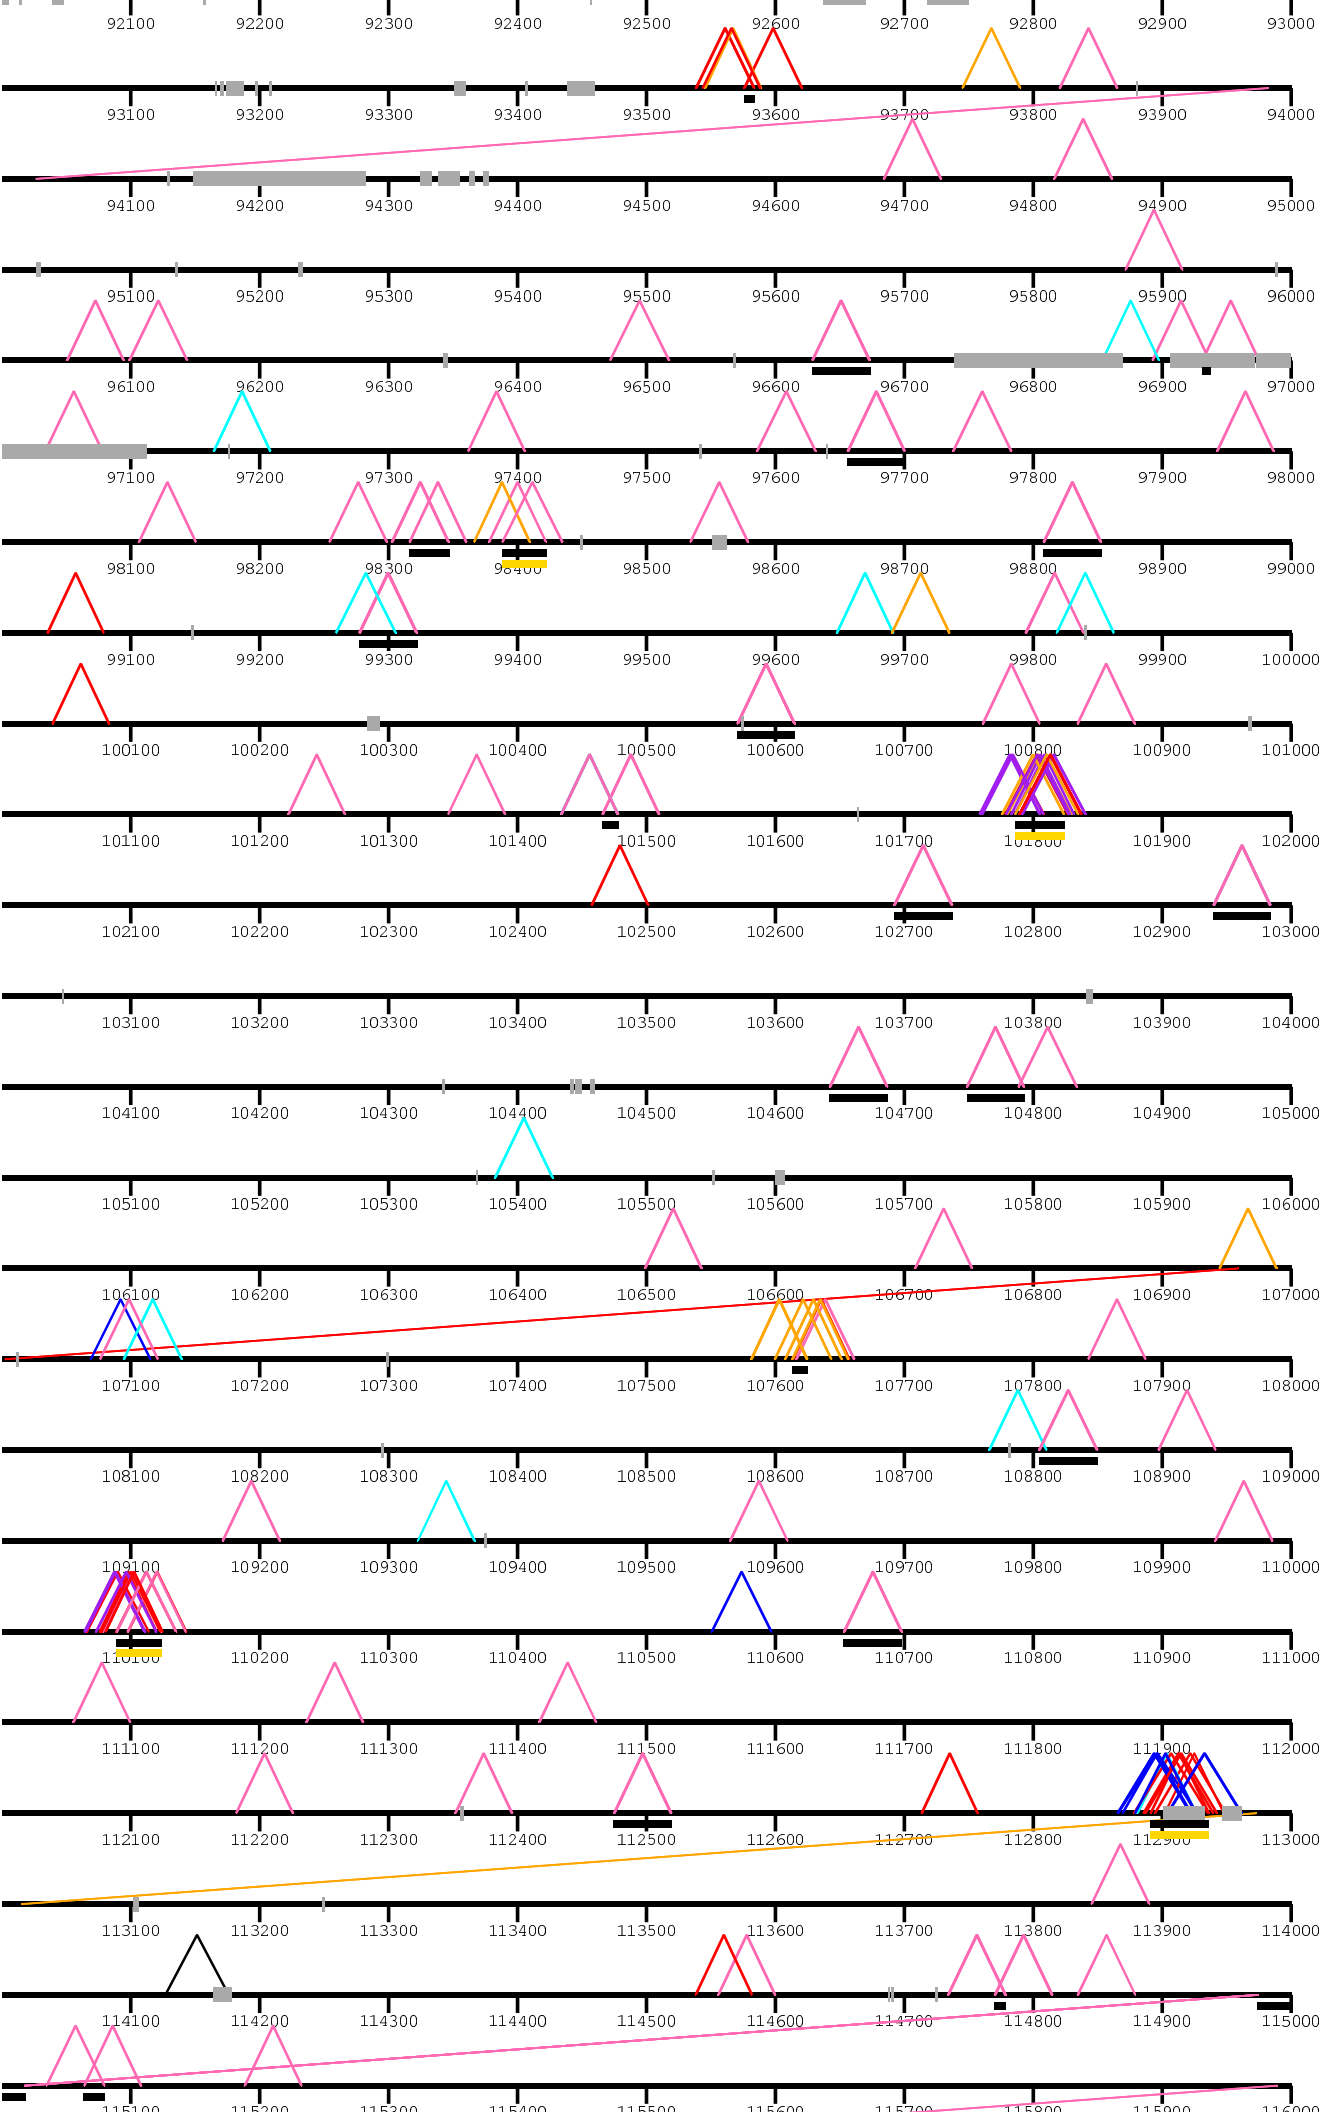

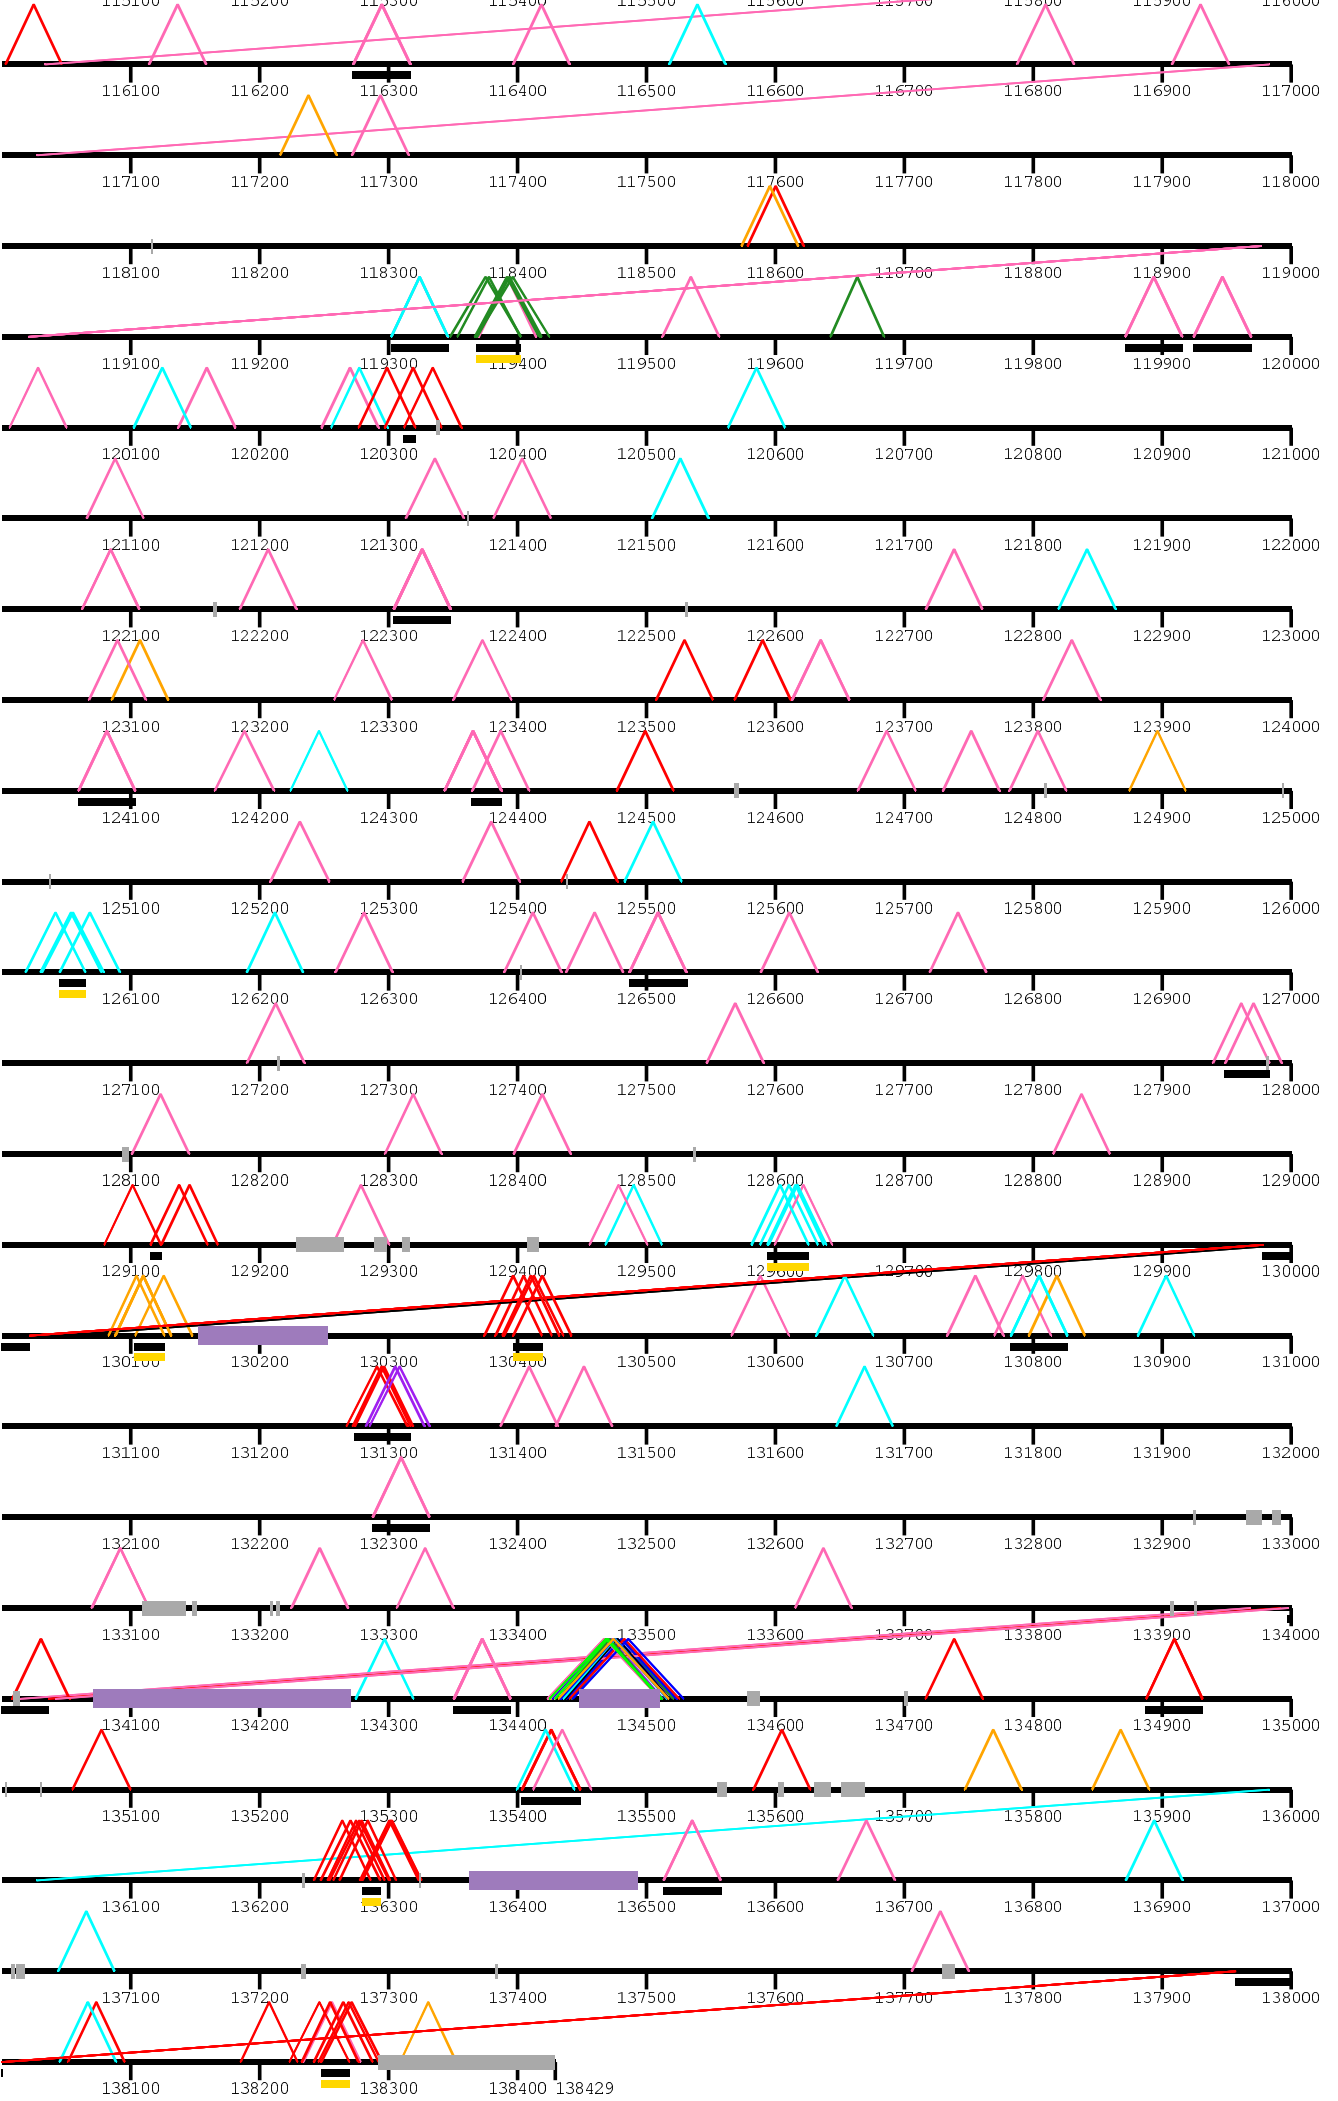

chr10

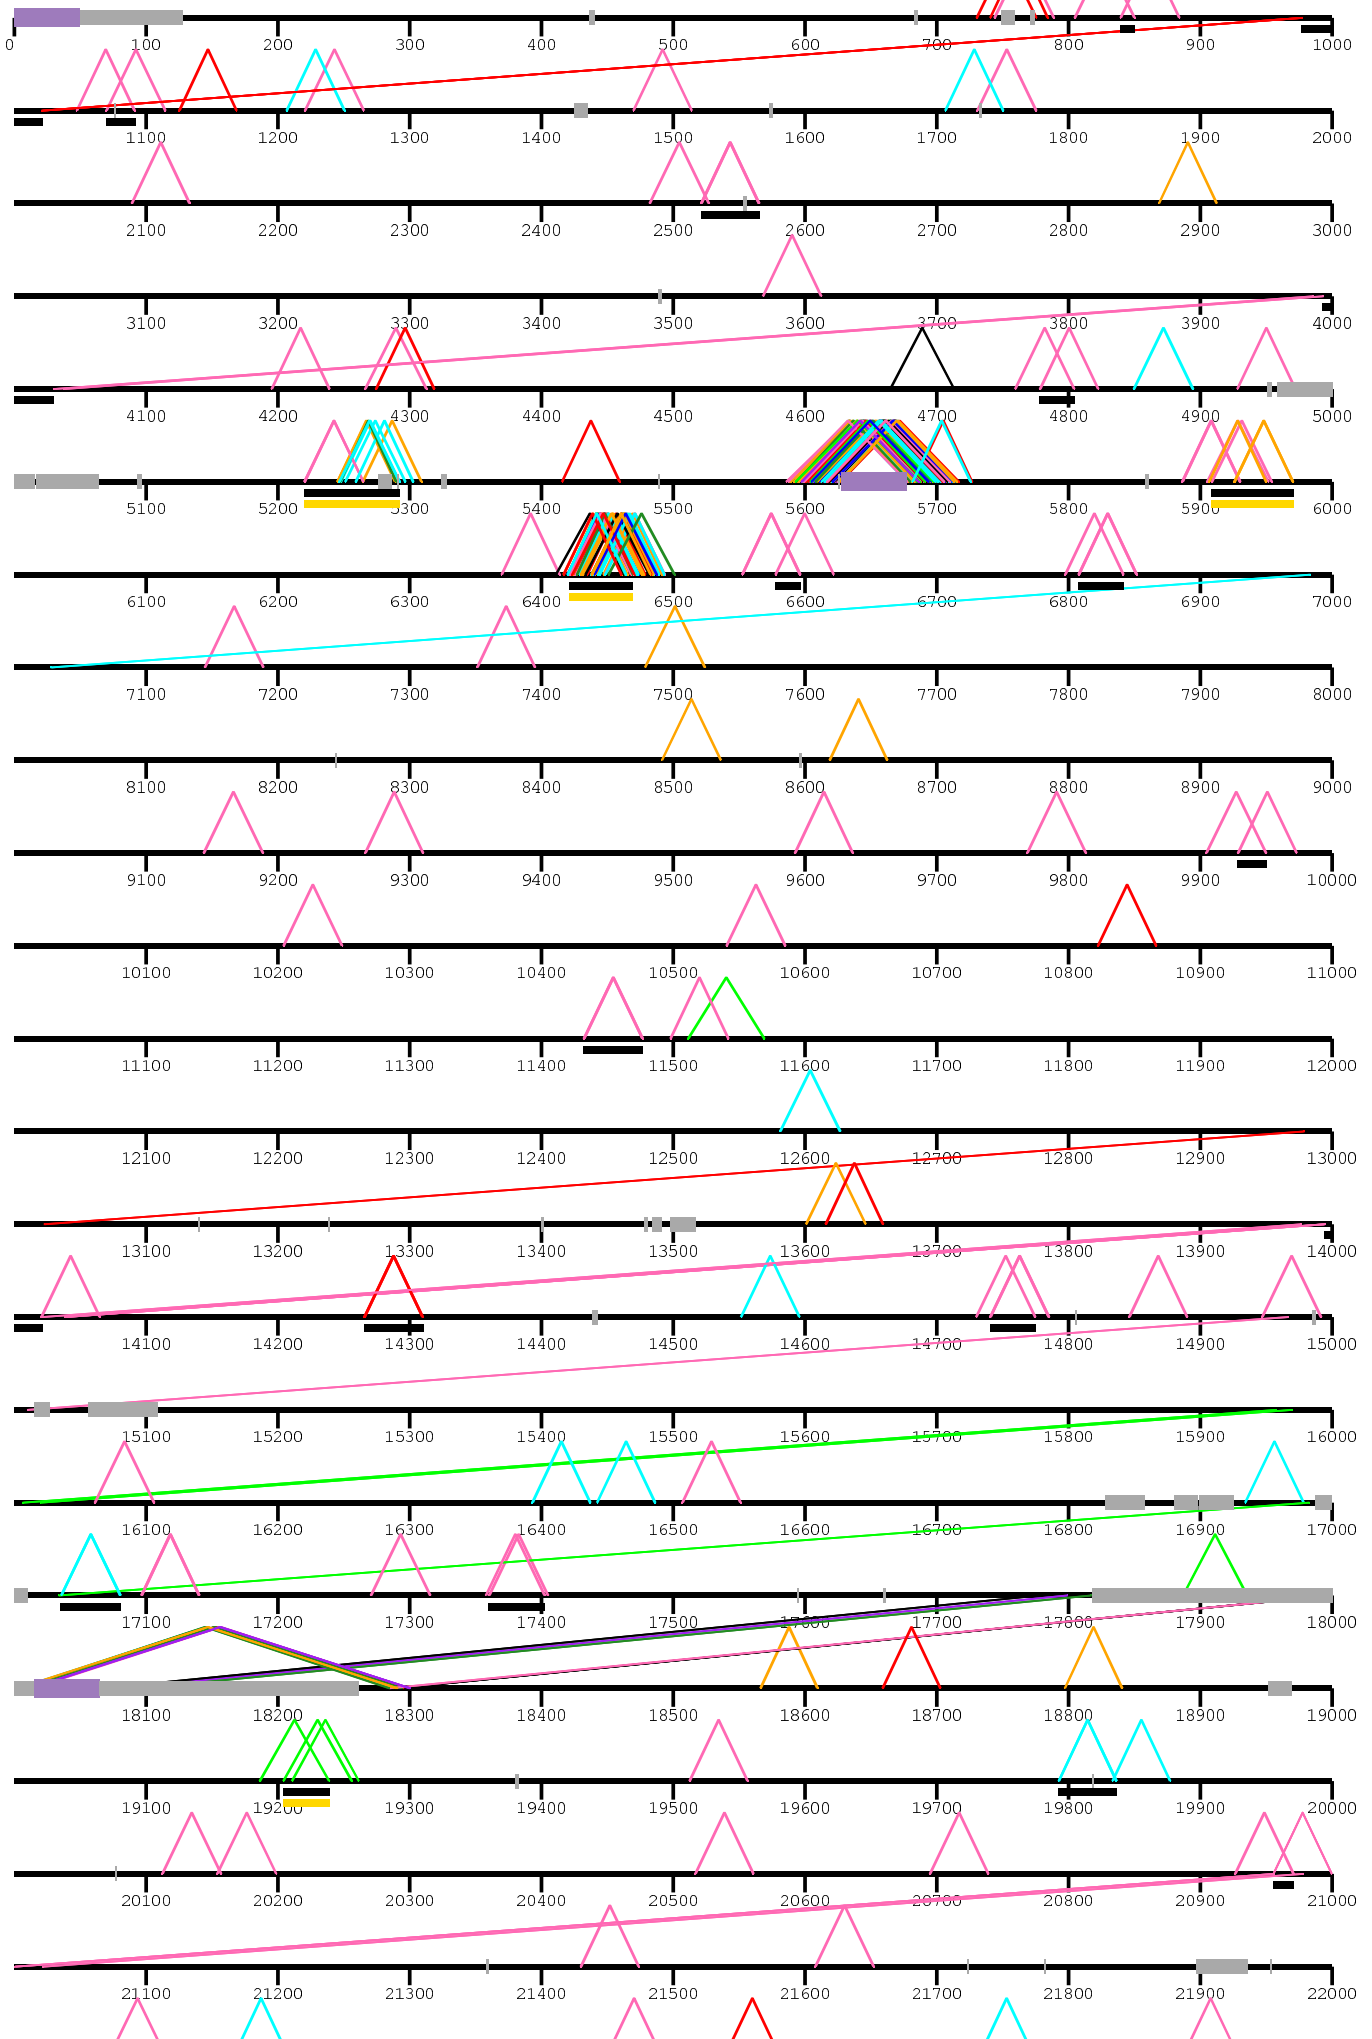



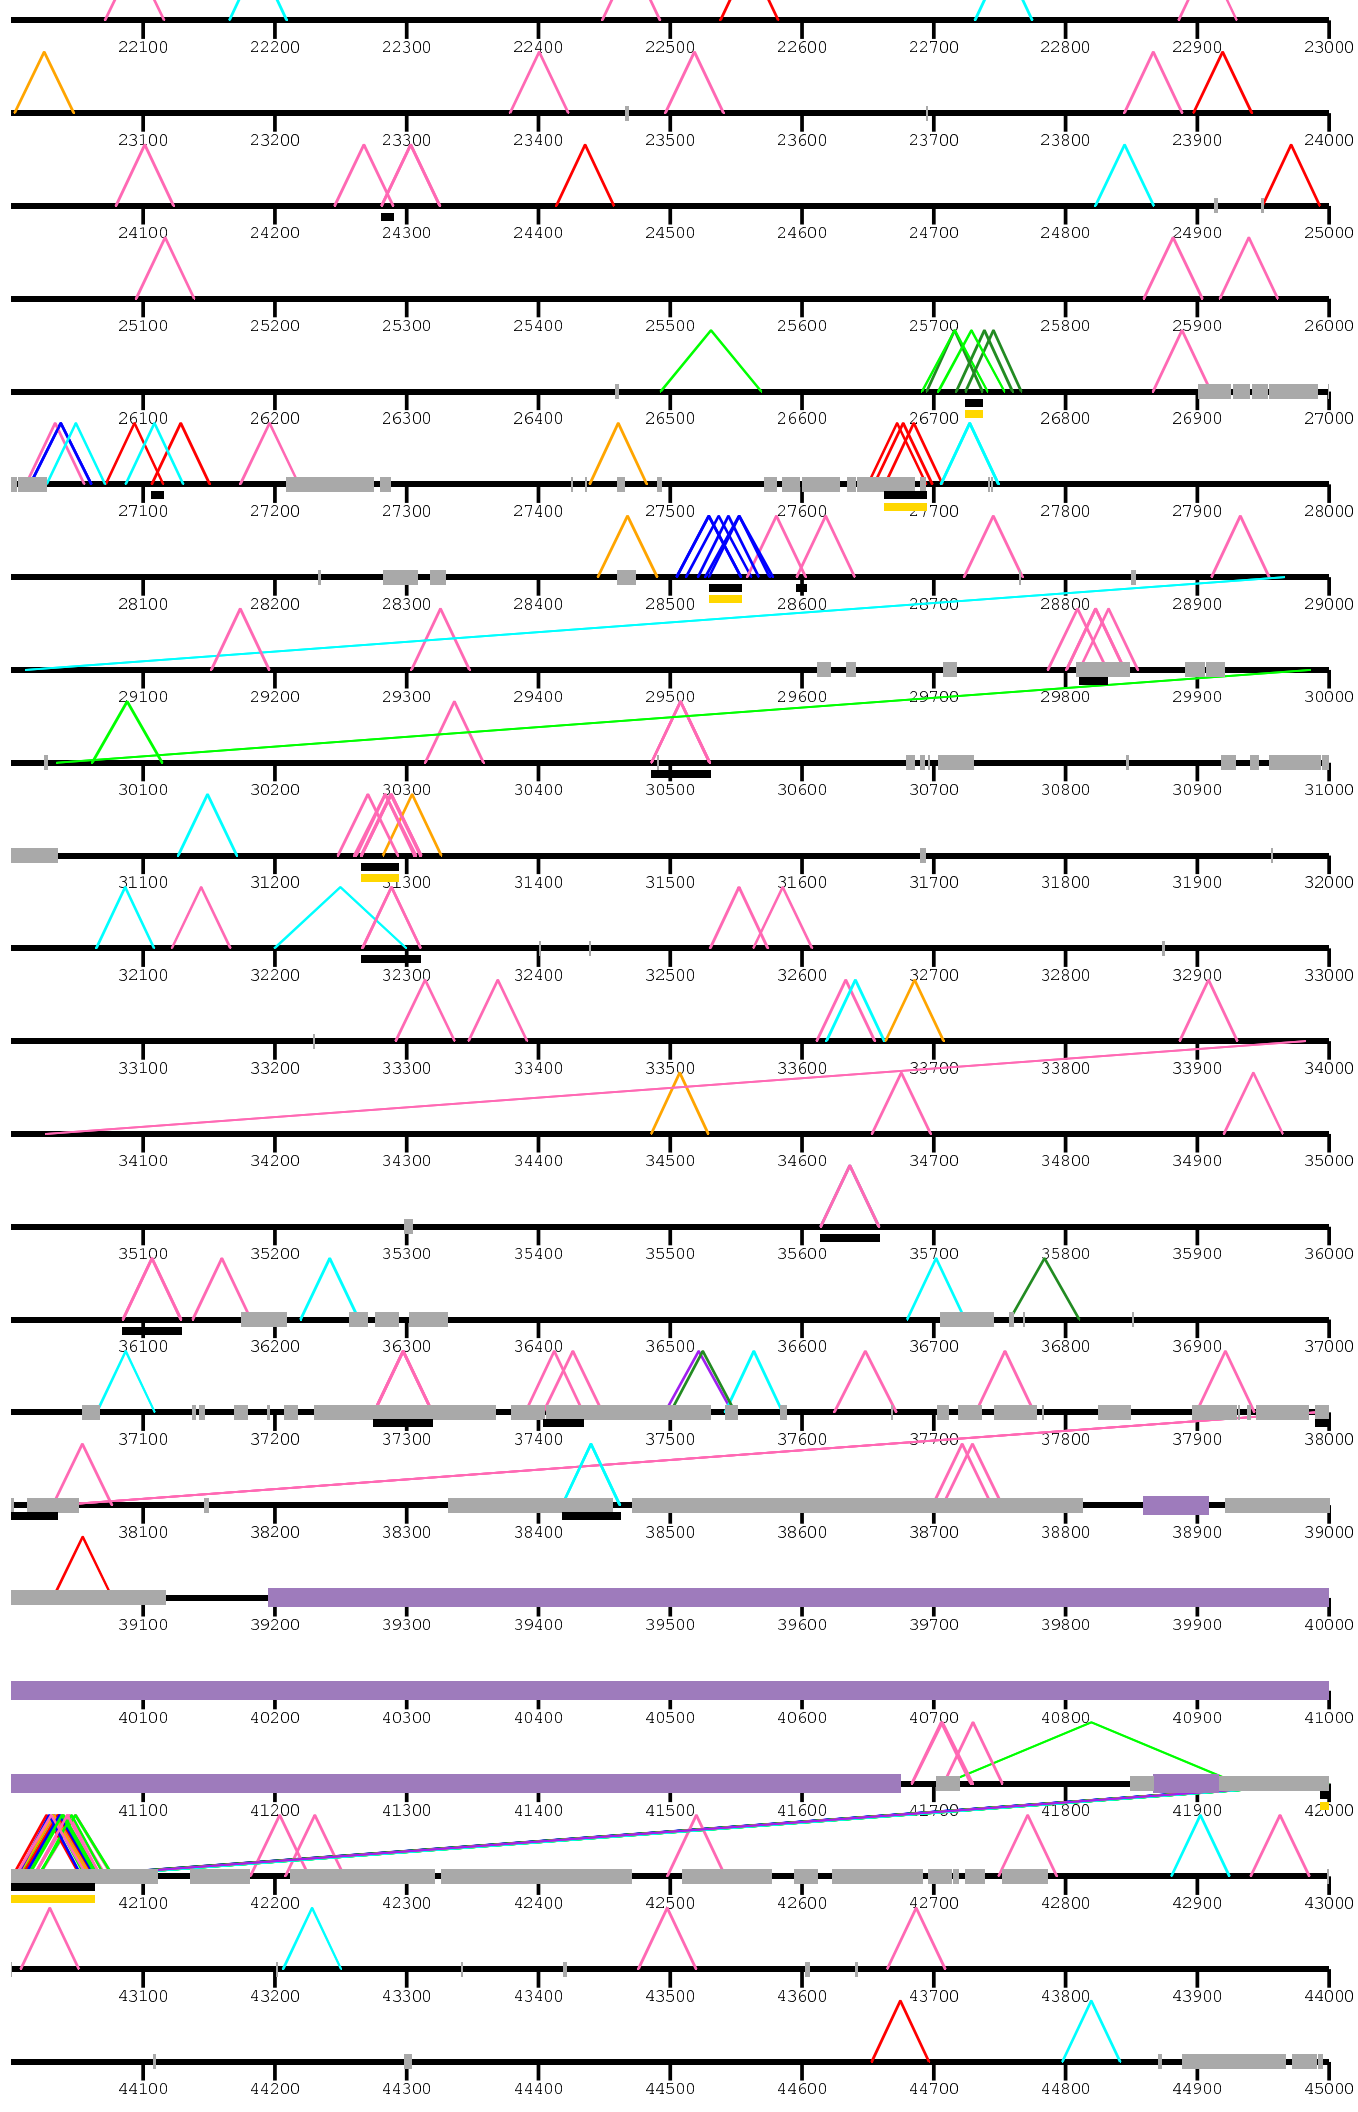

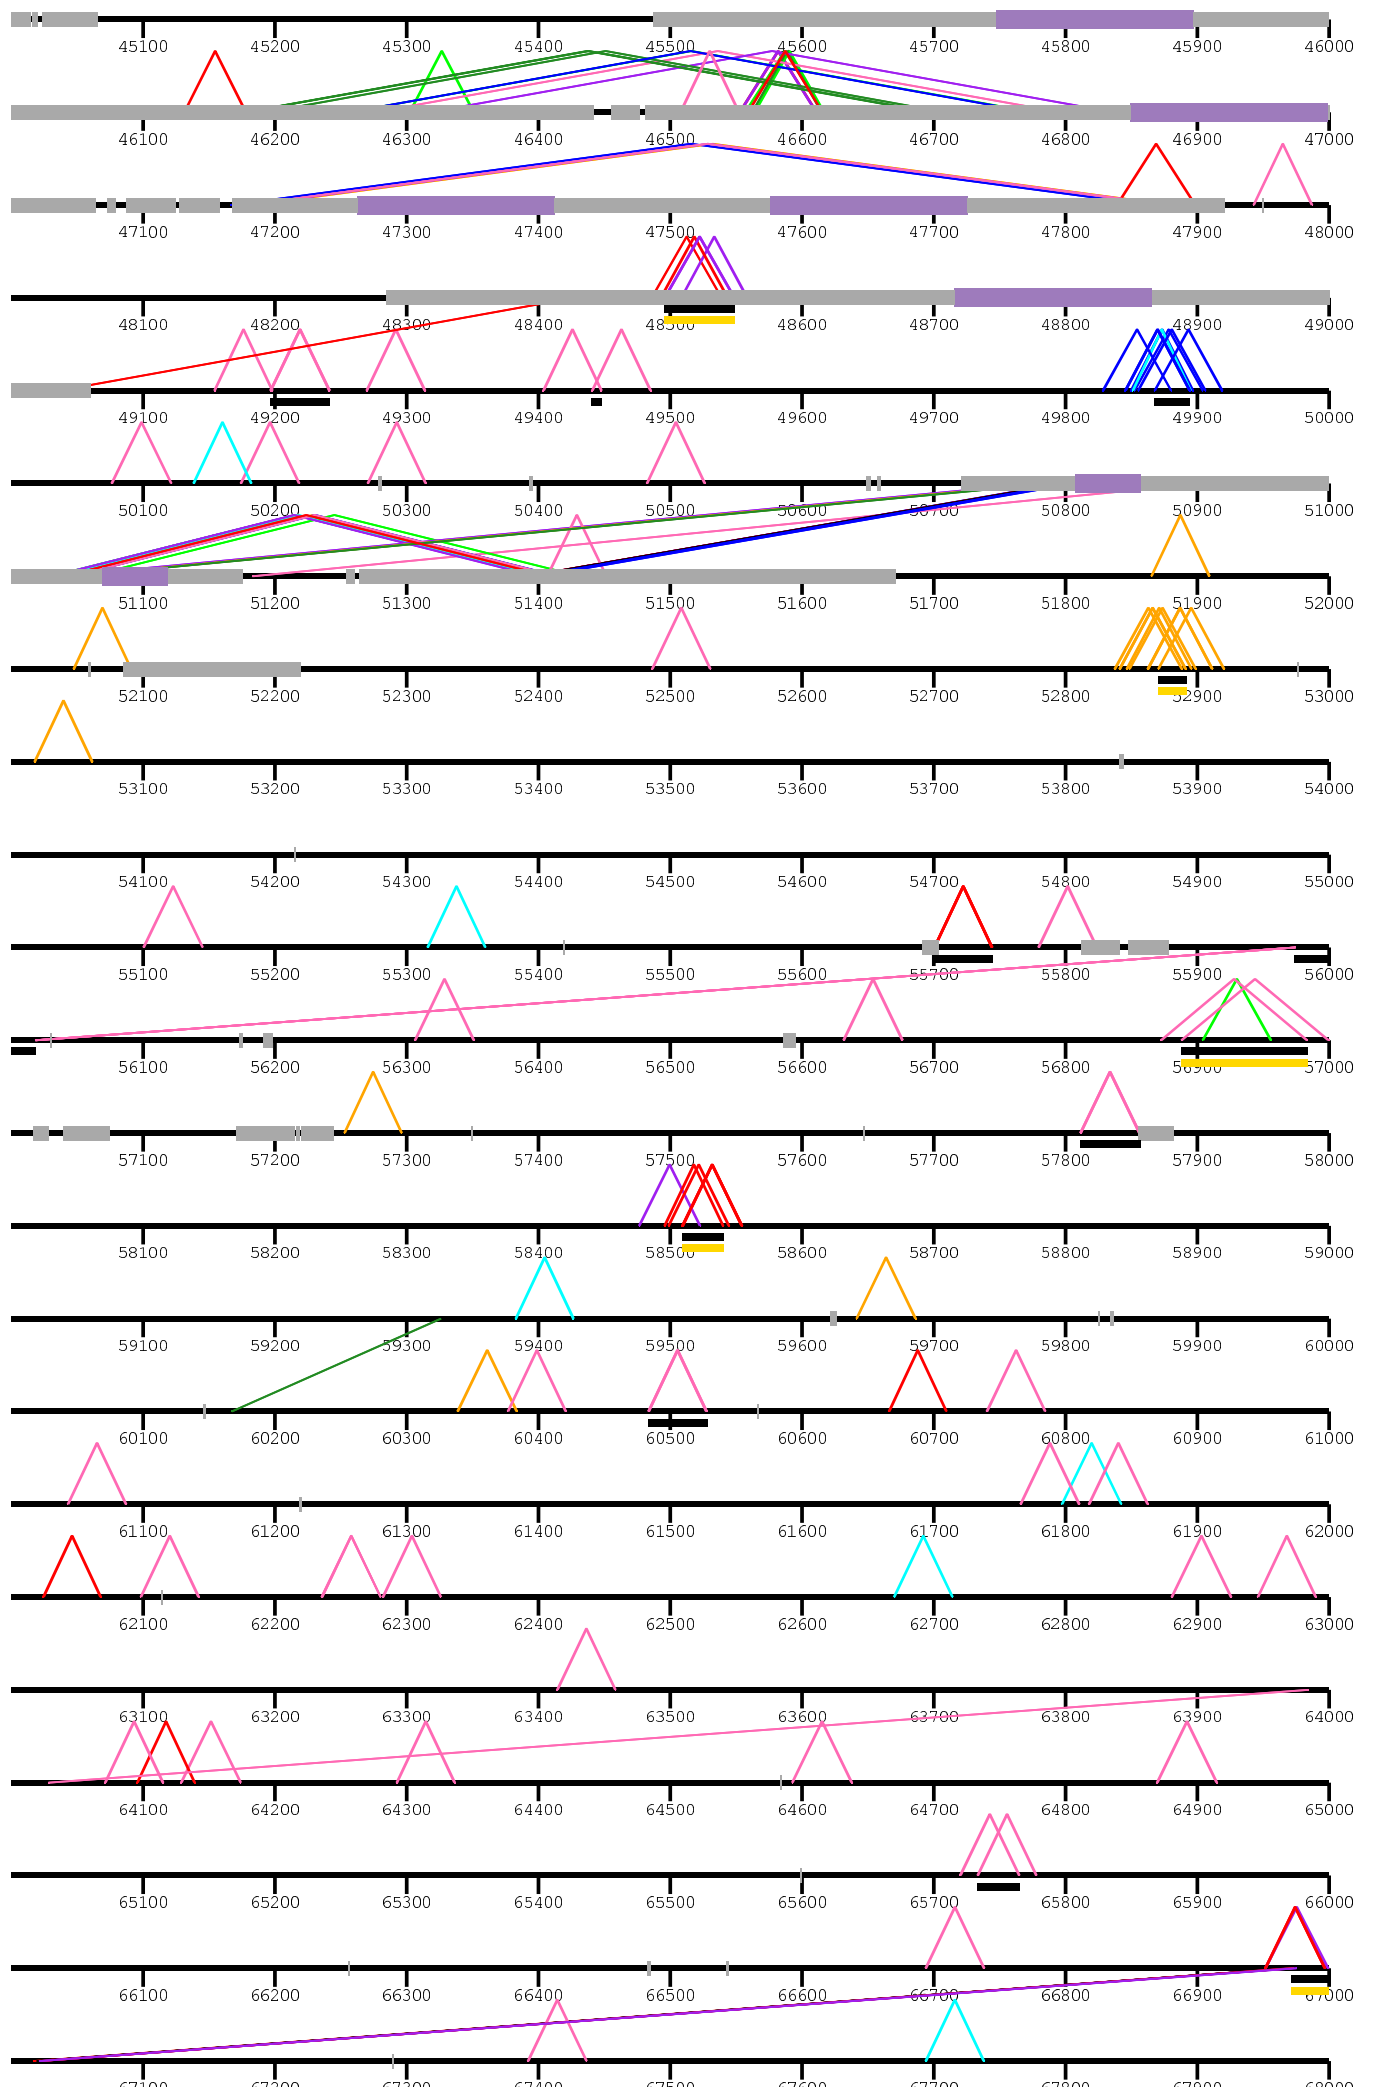

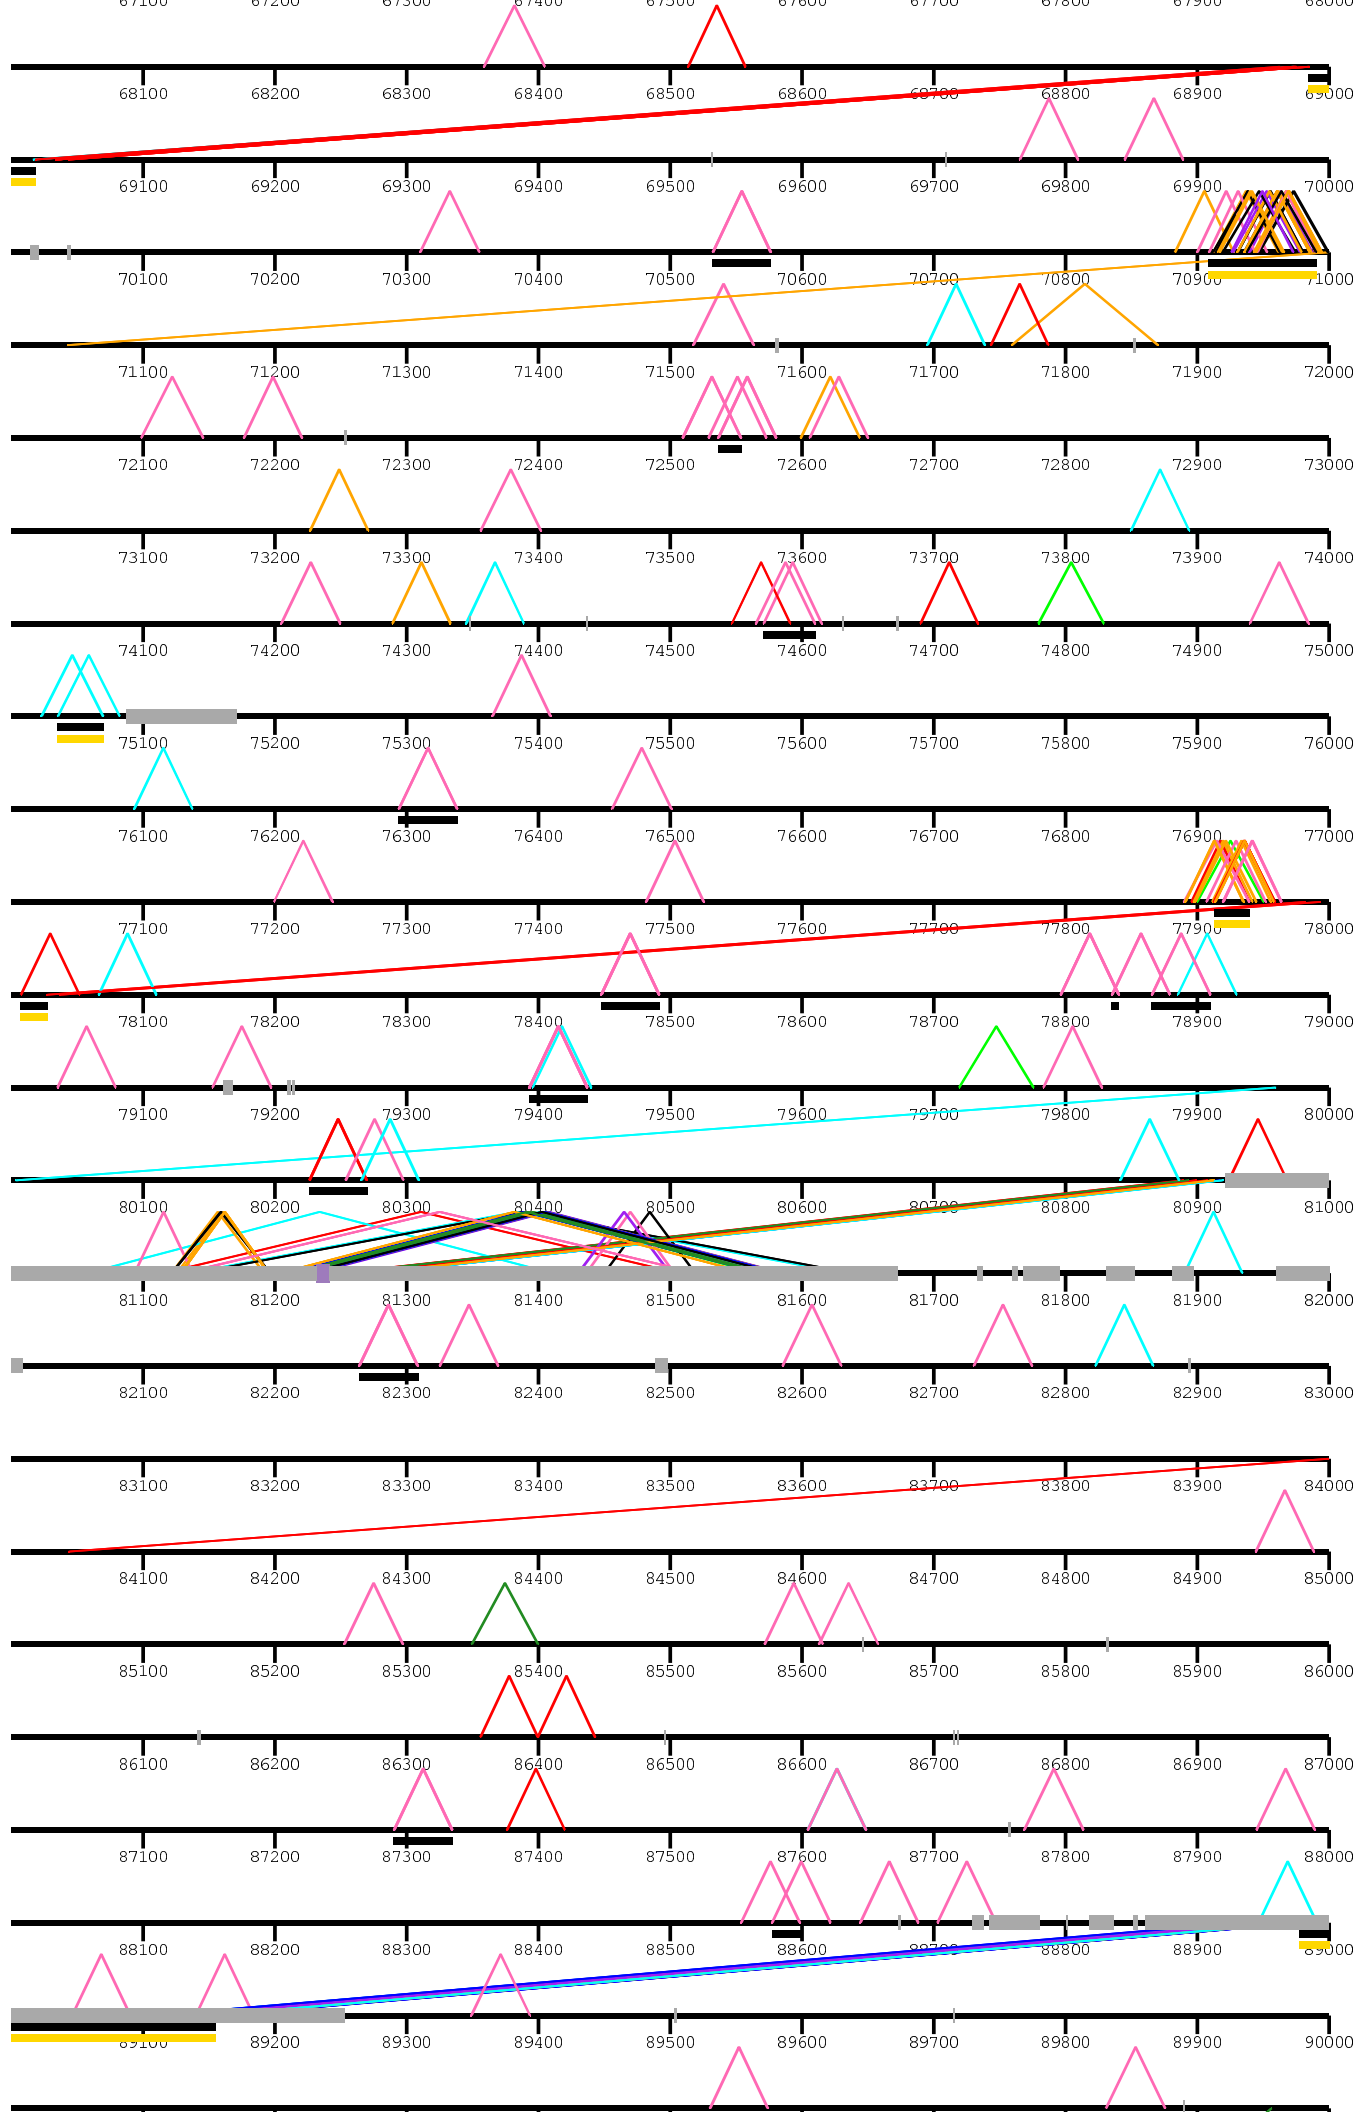

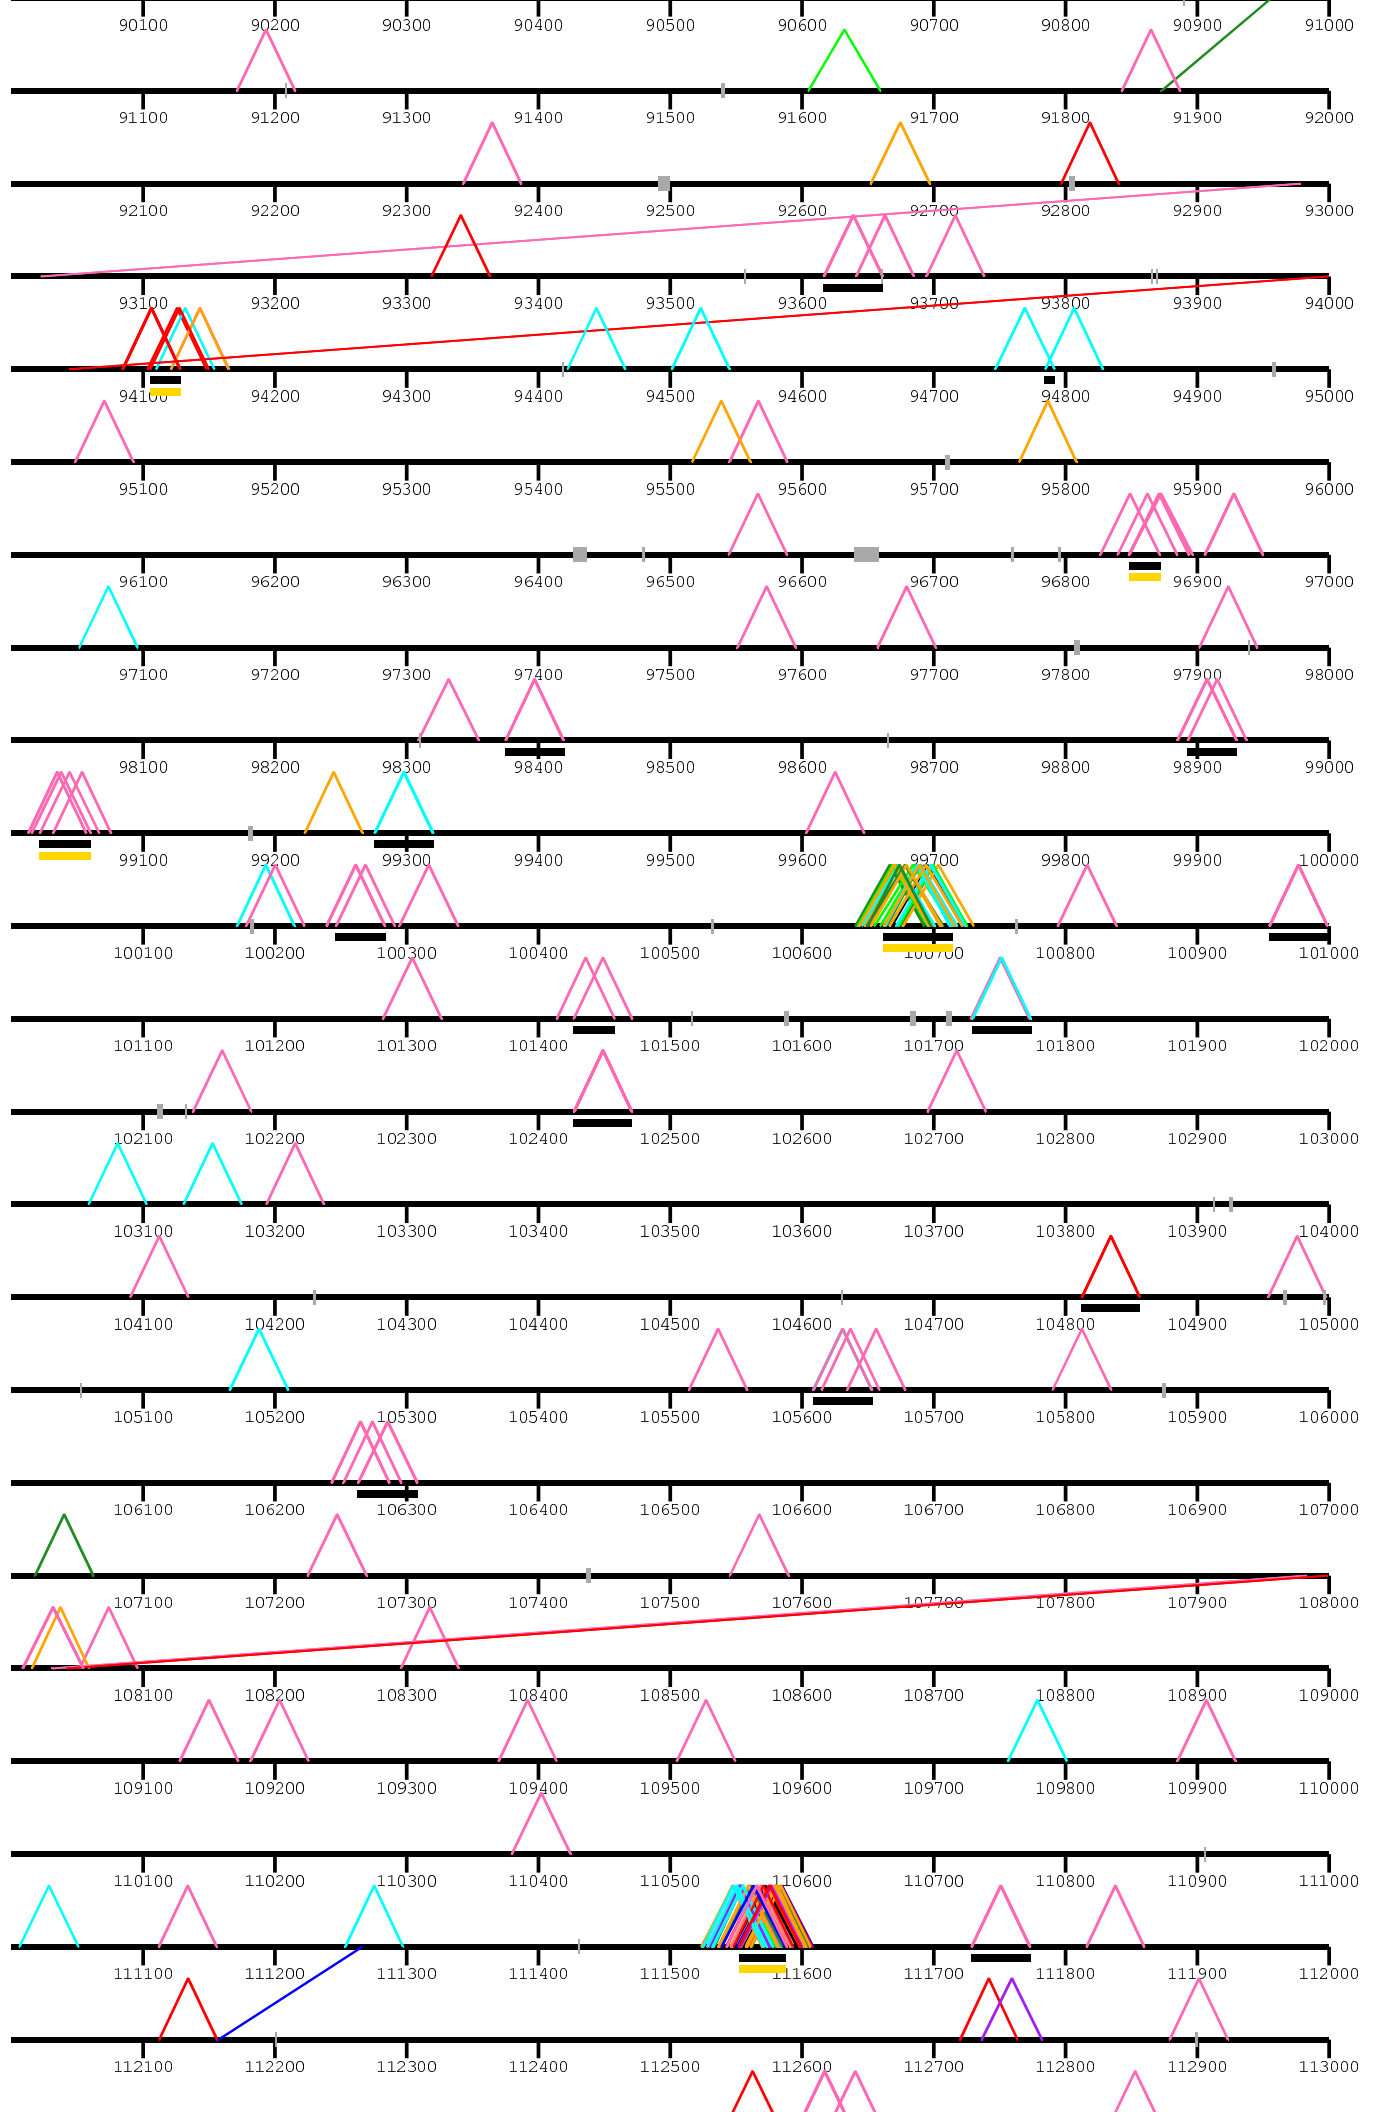

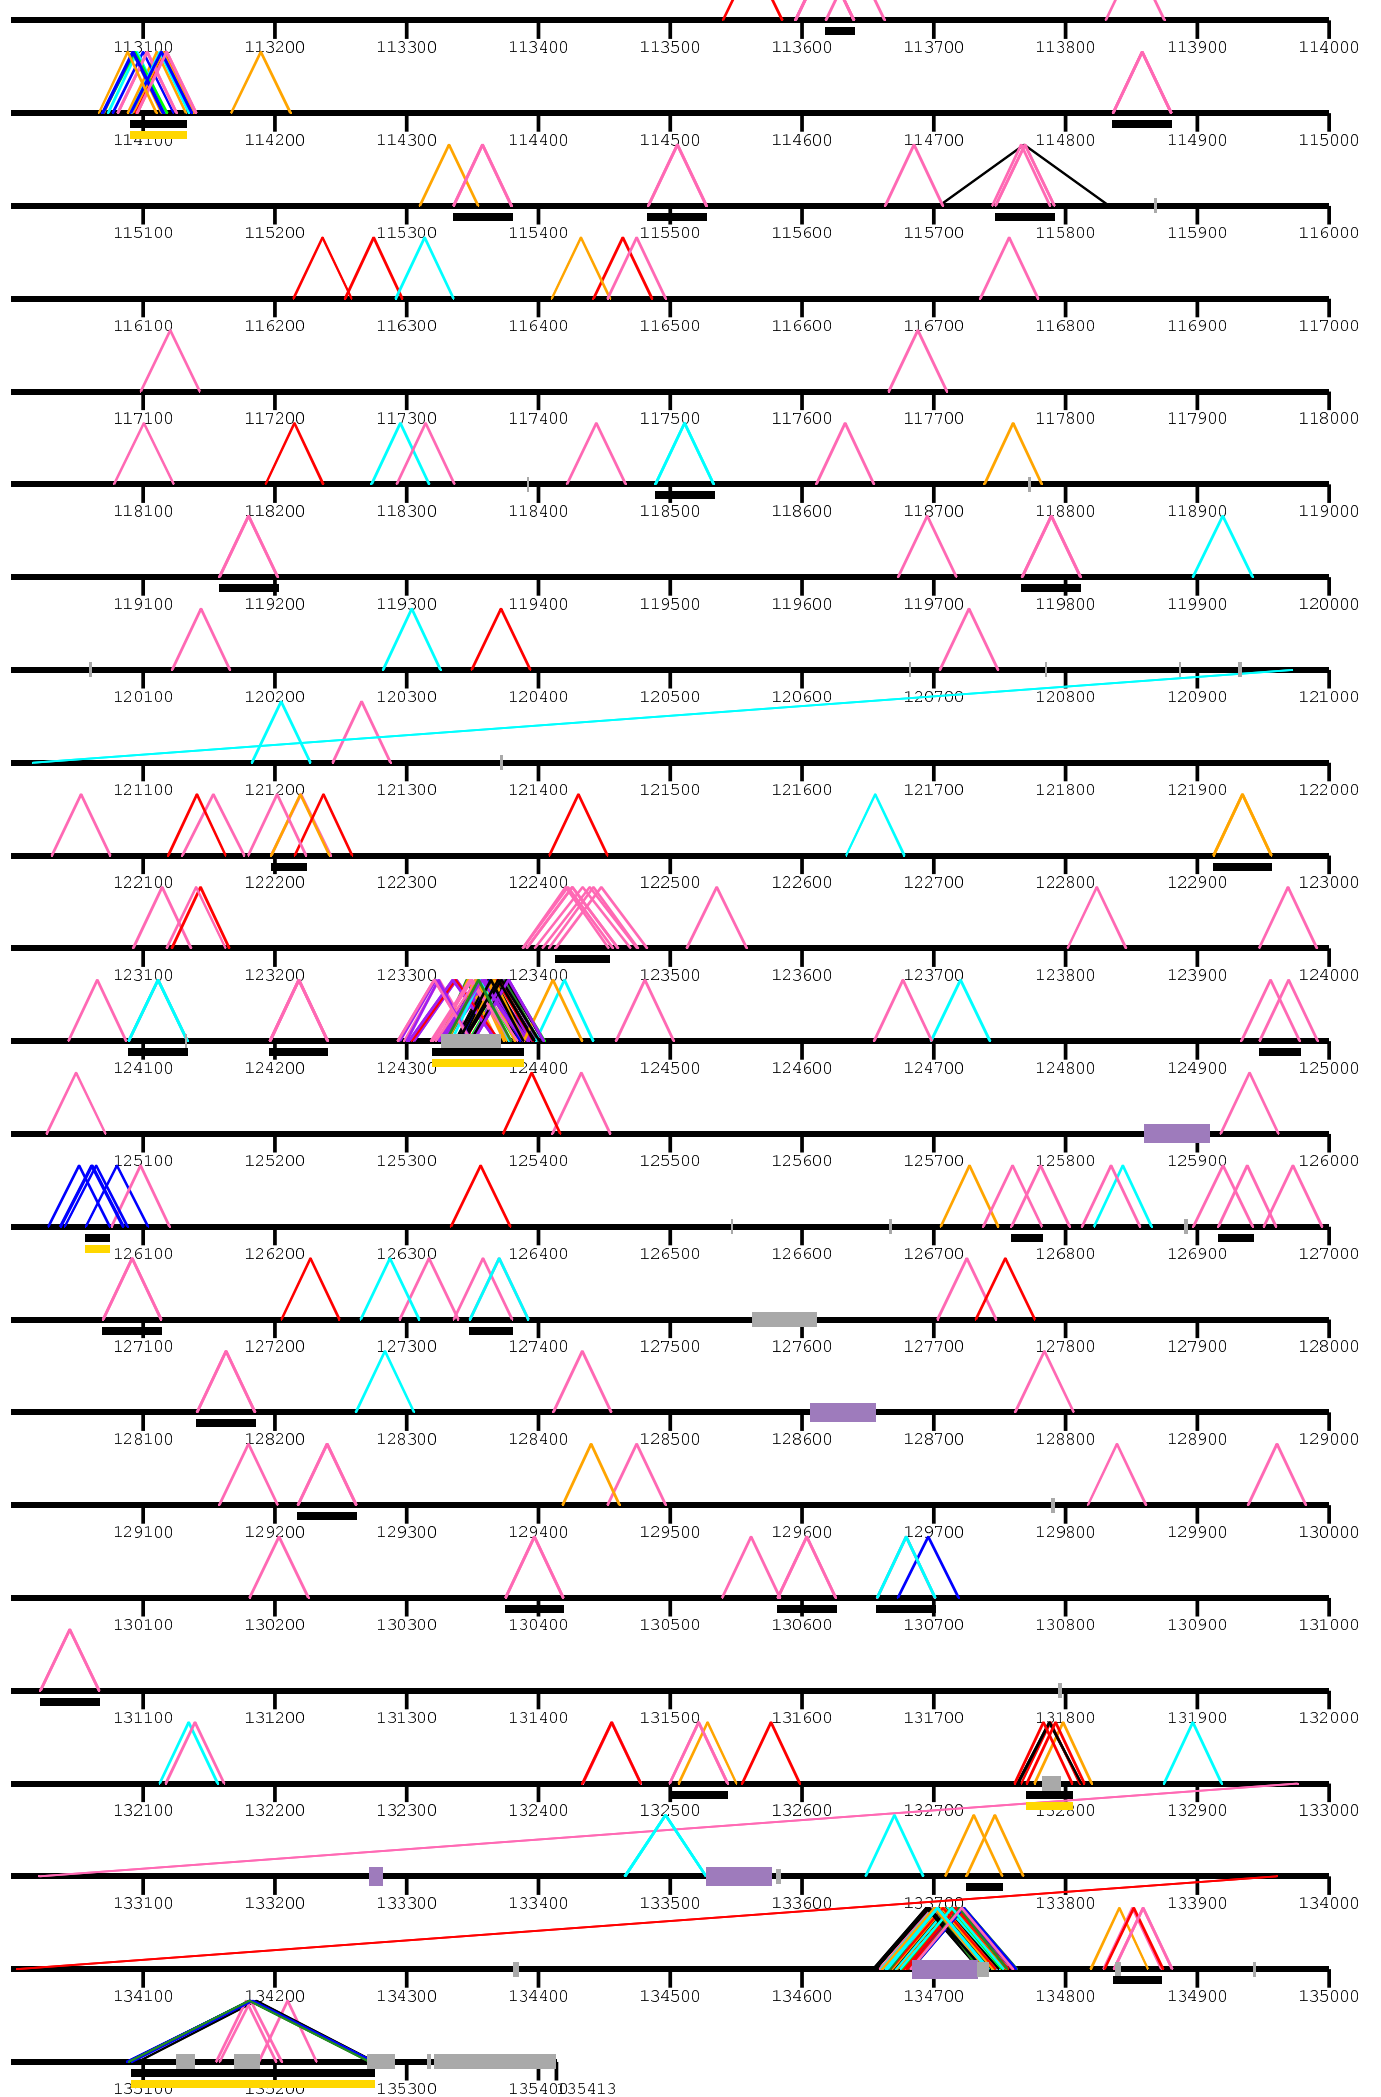

chr11

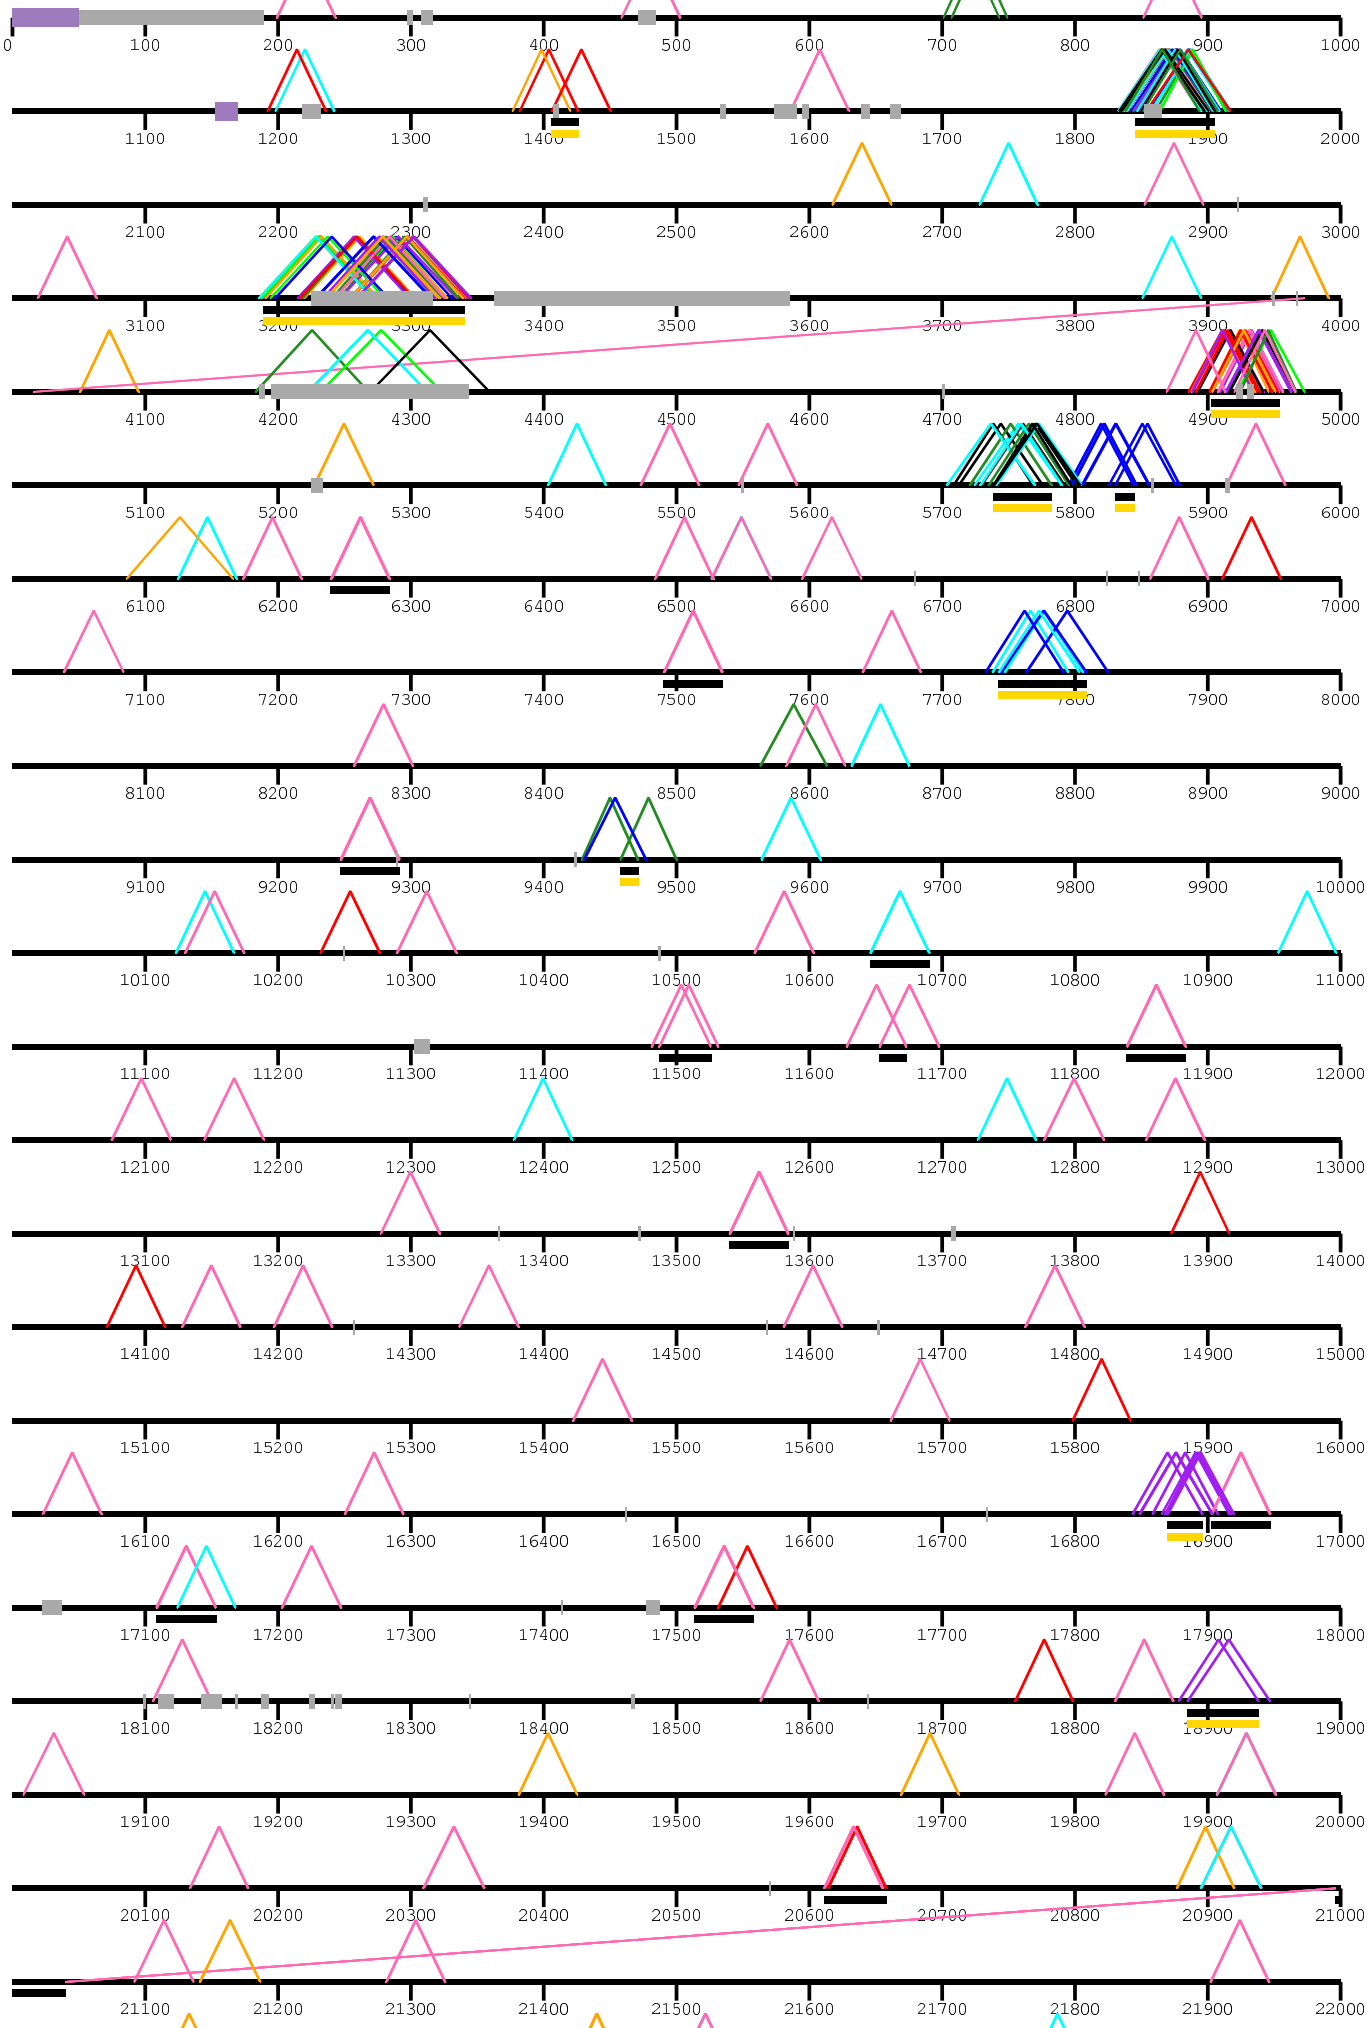

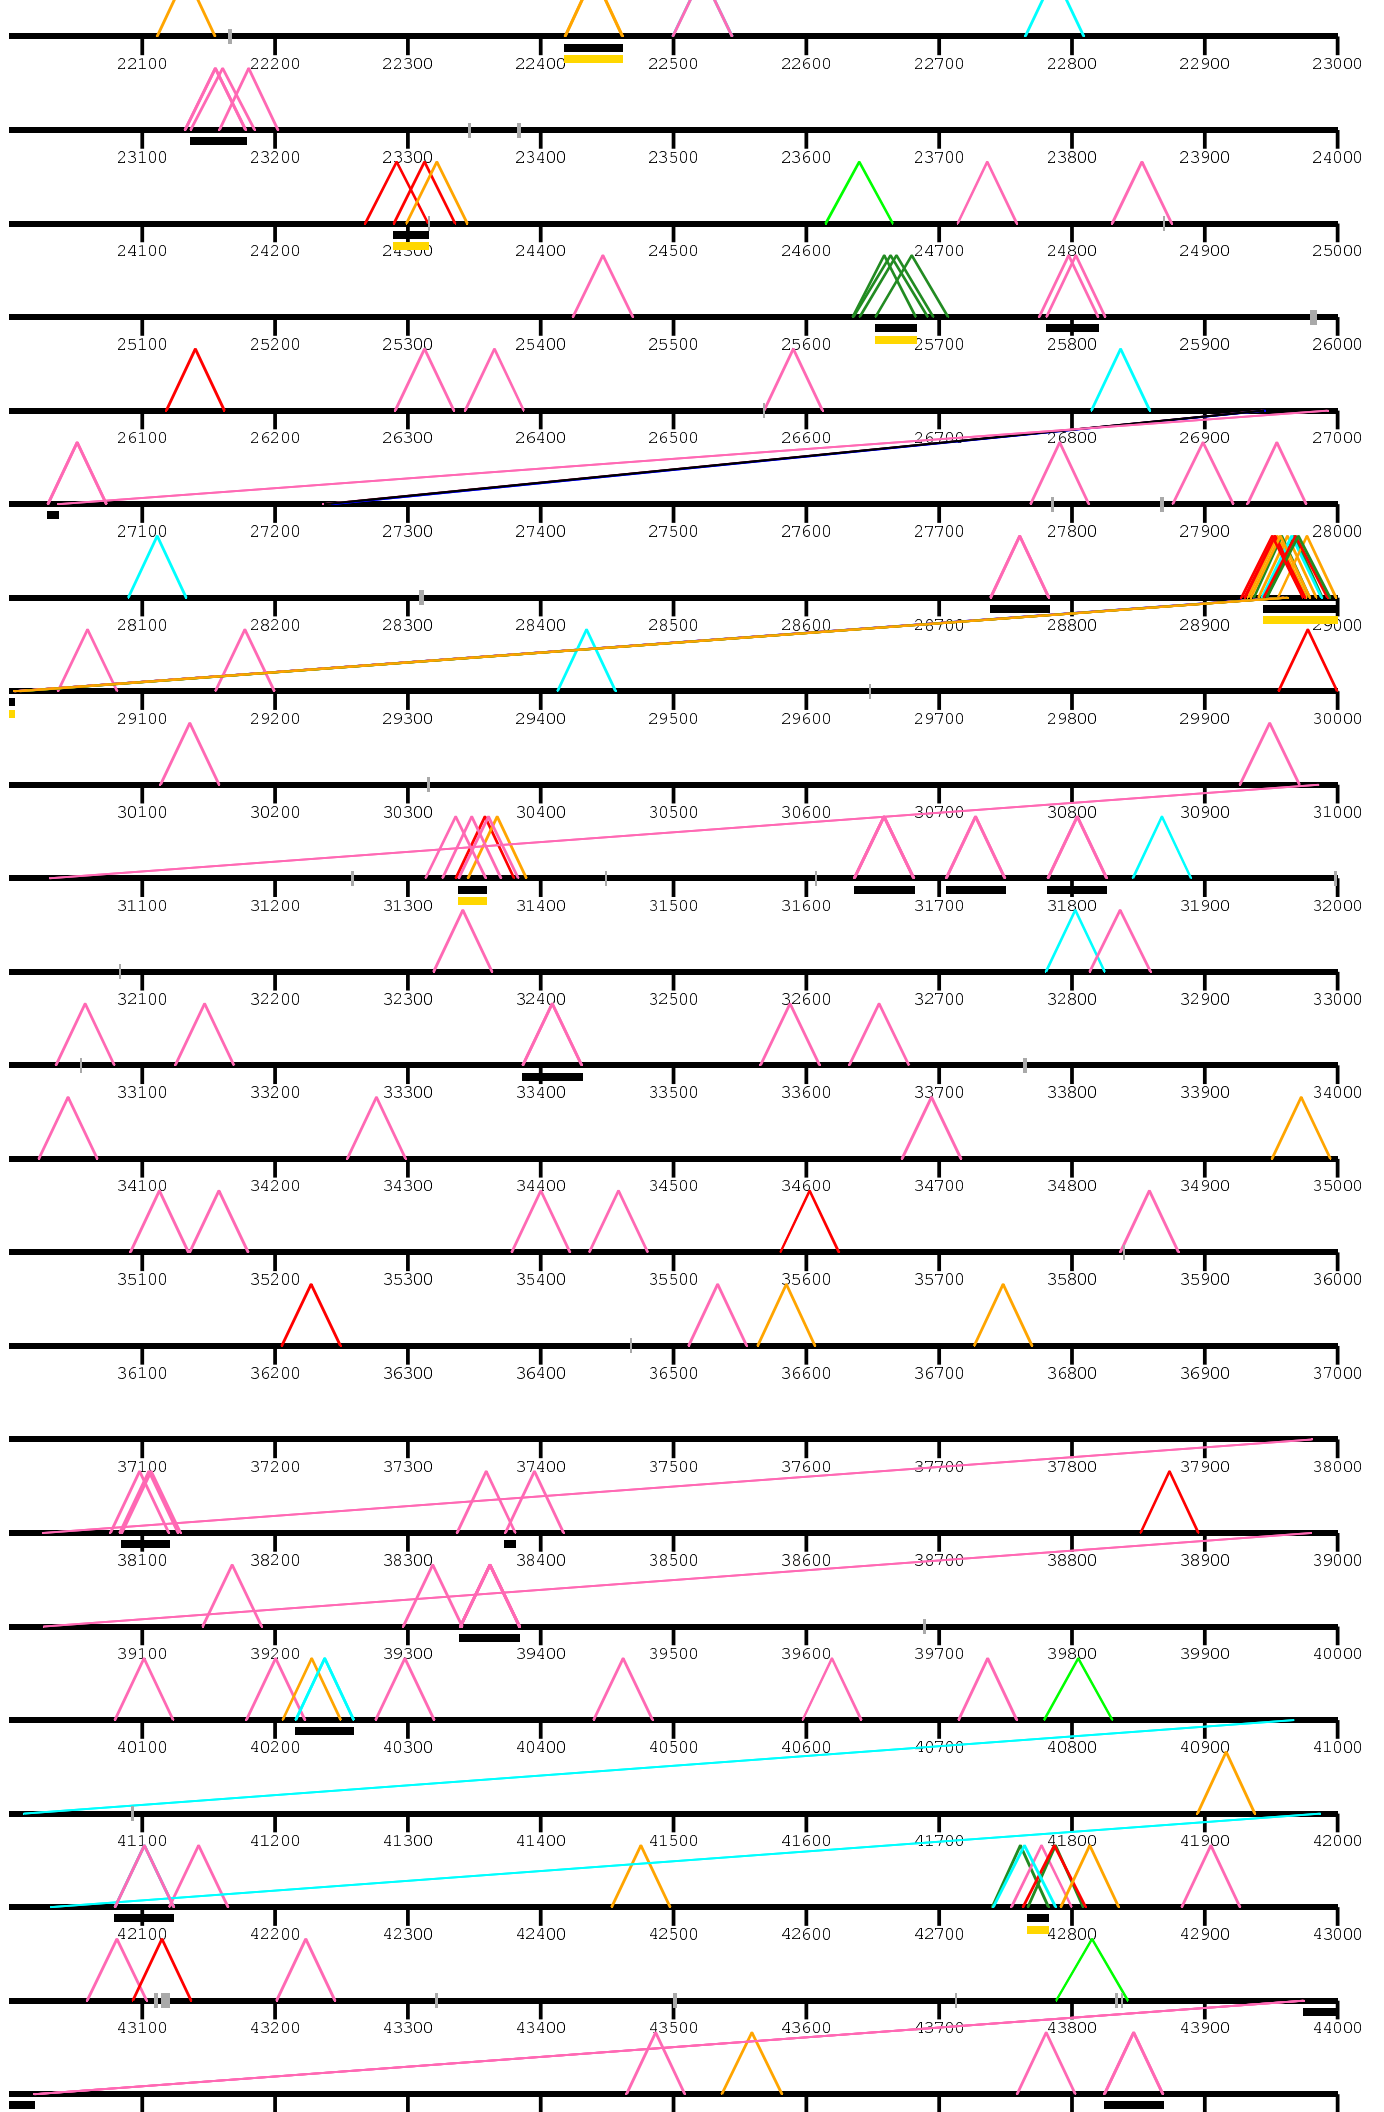

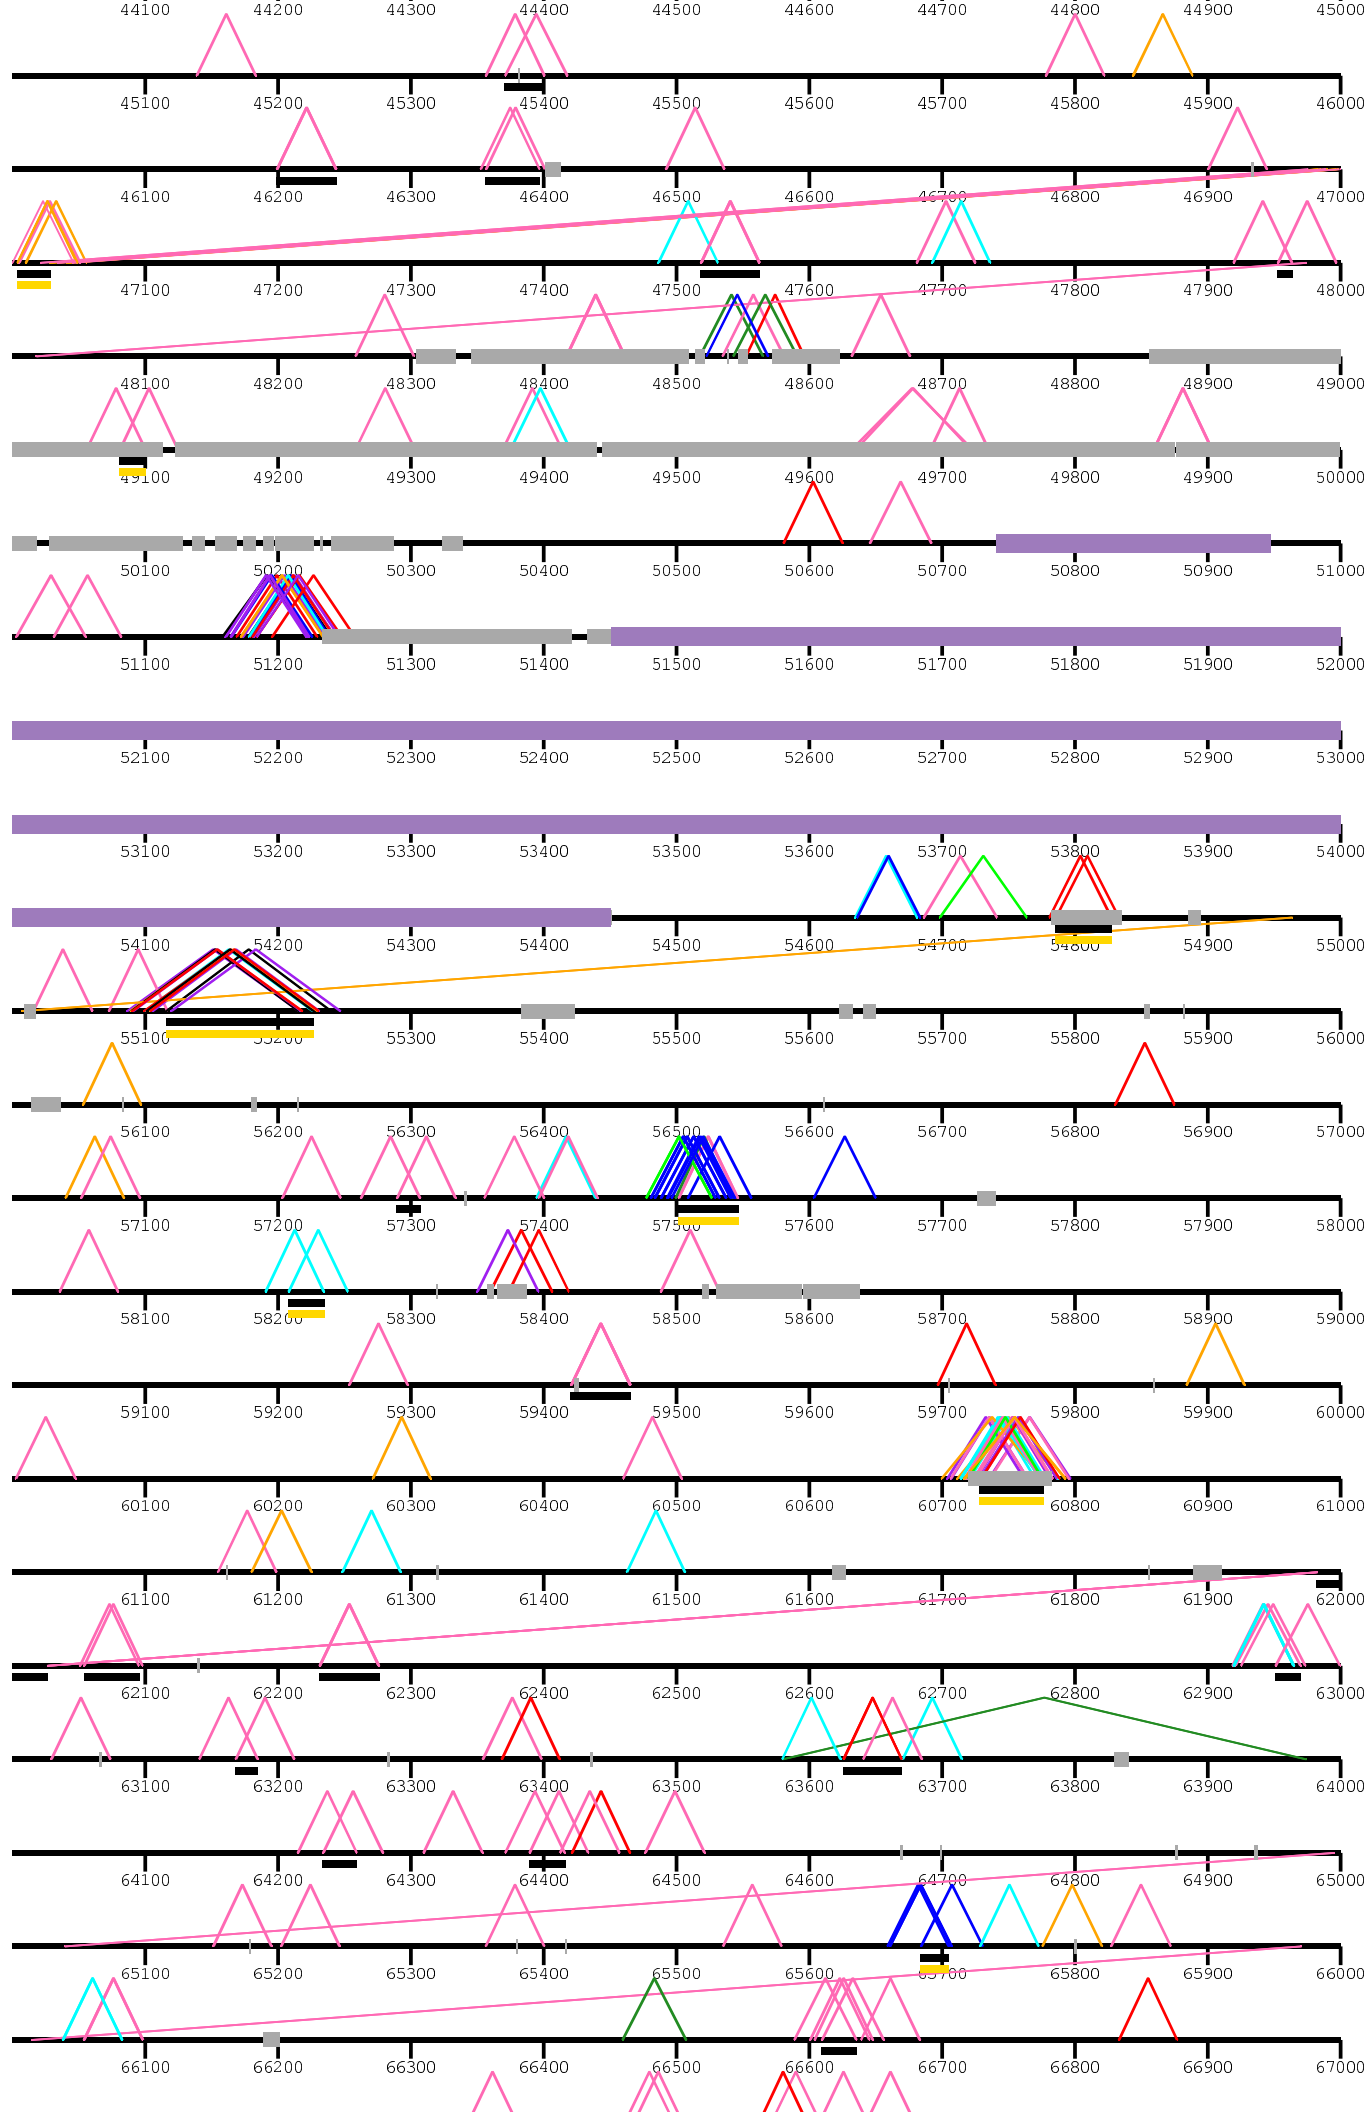



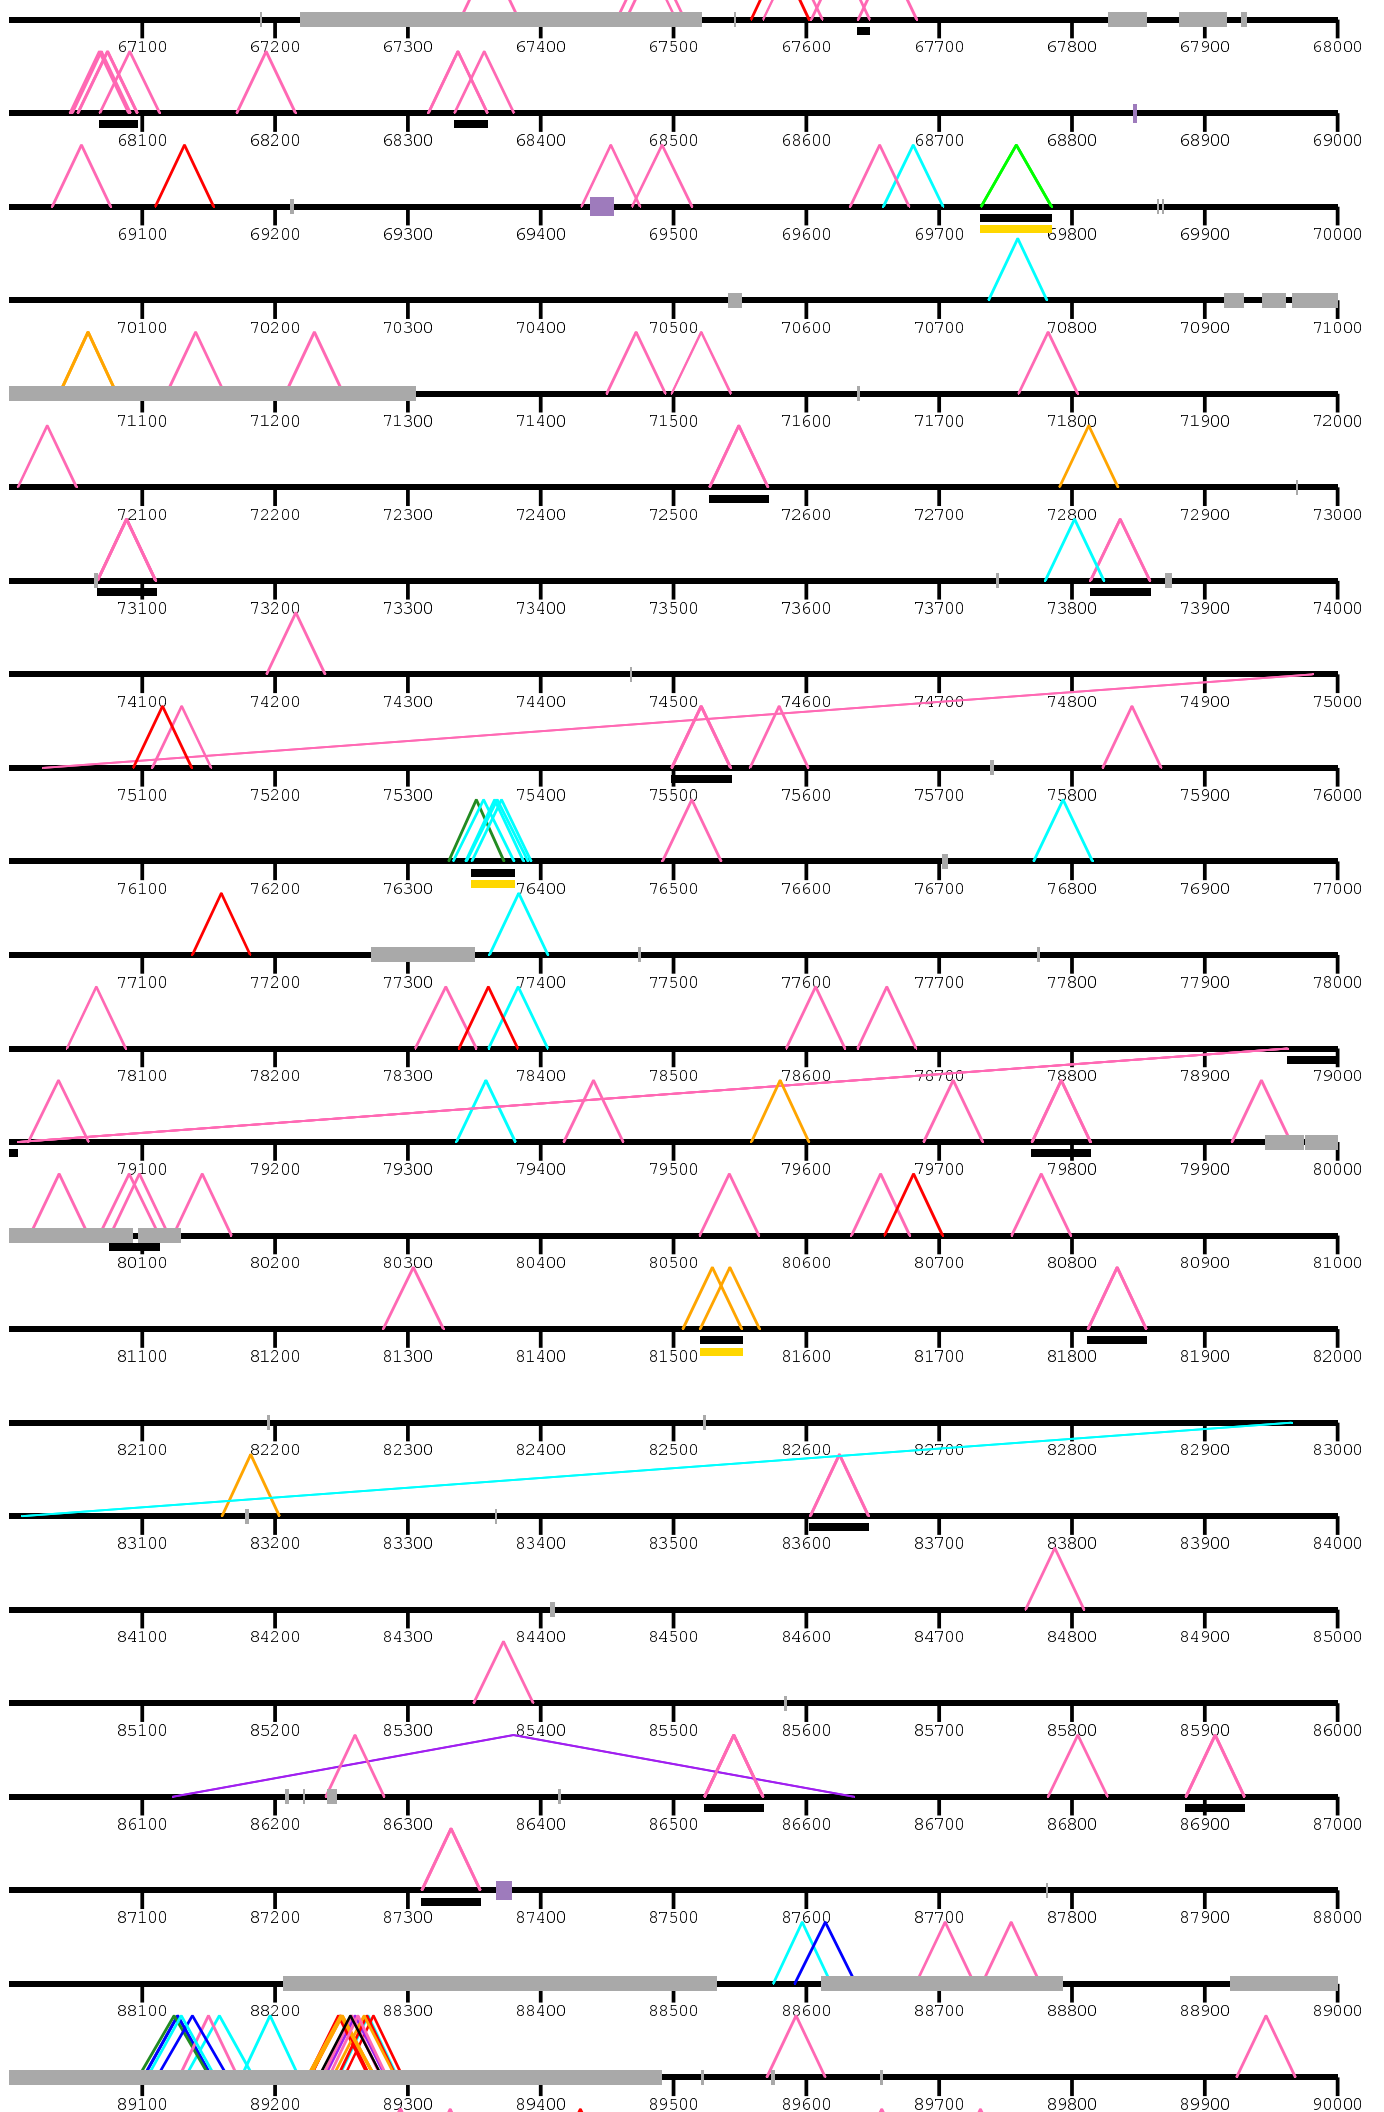

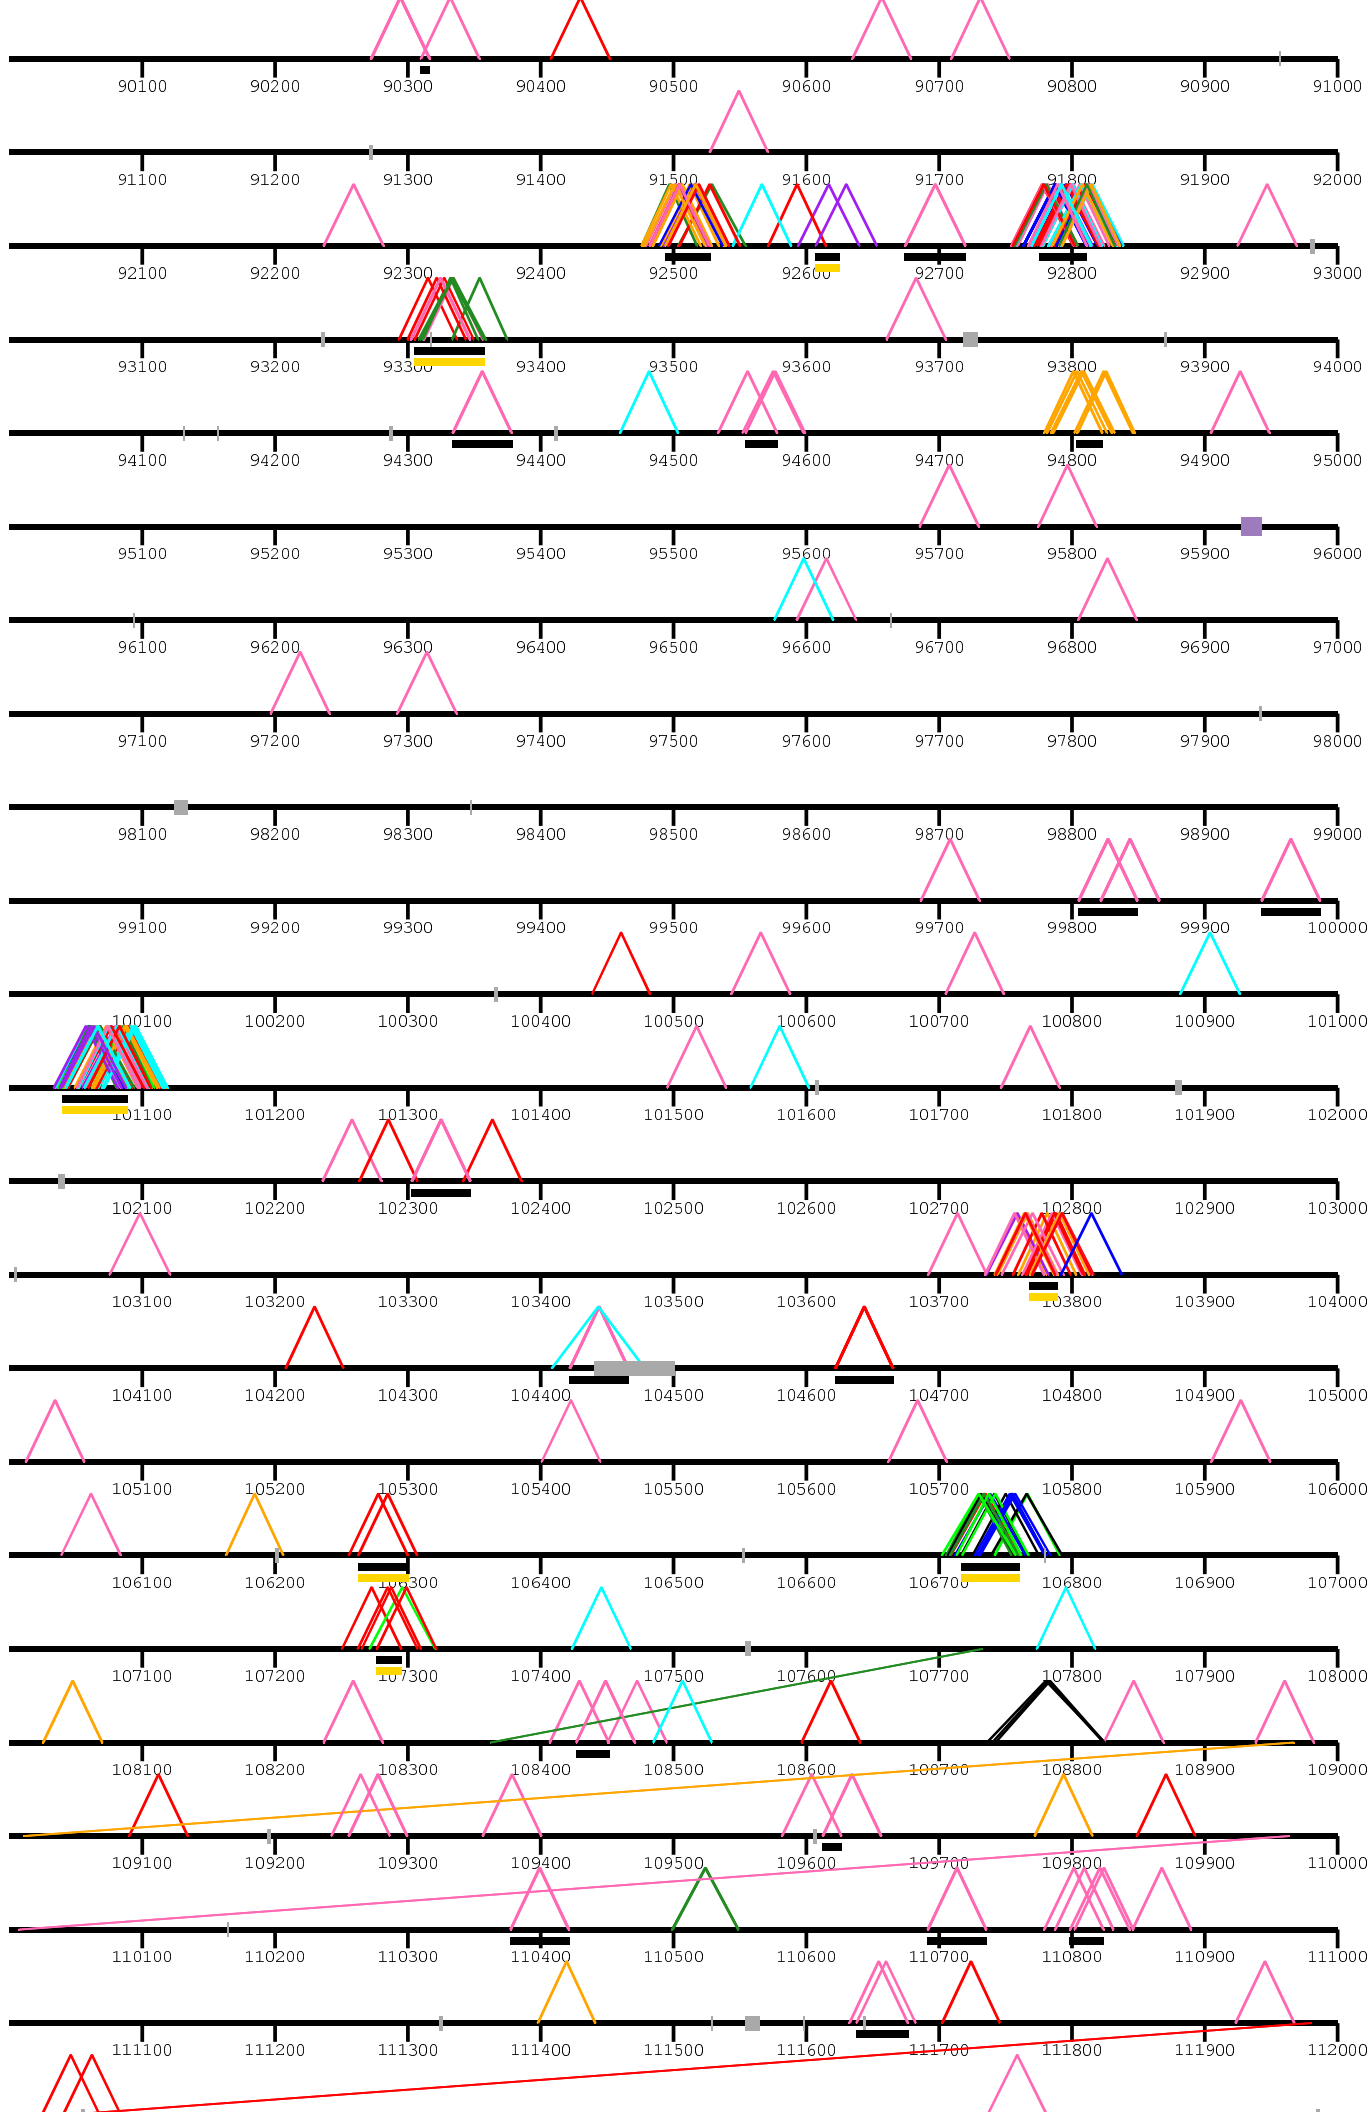

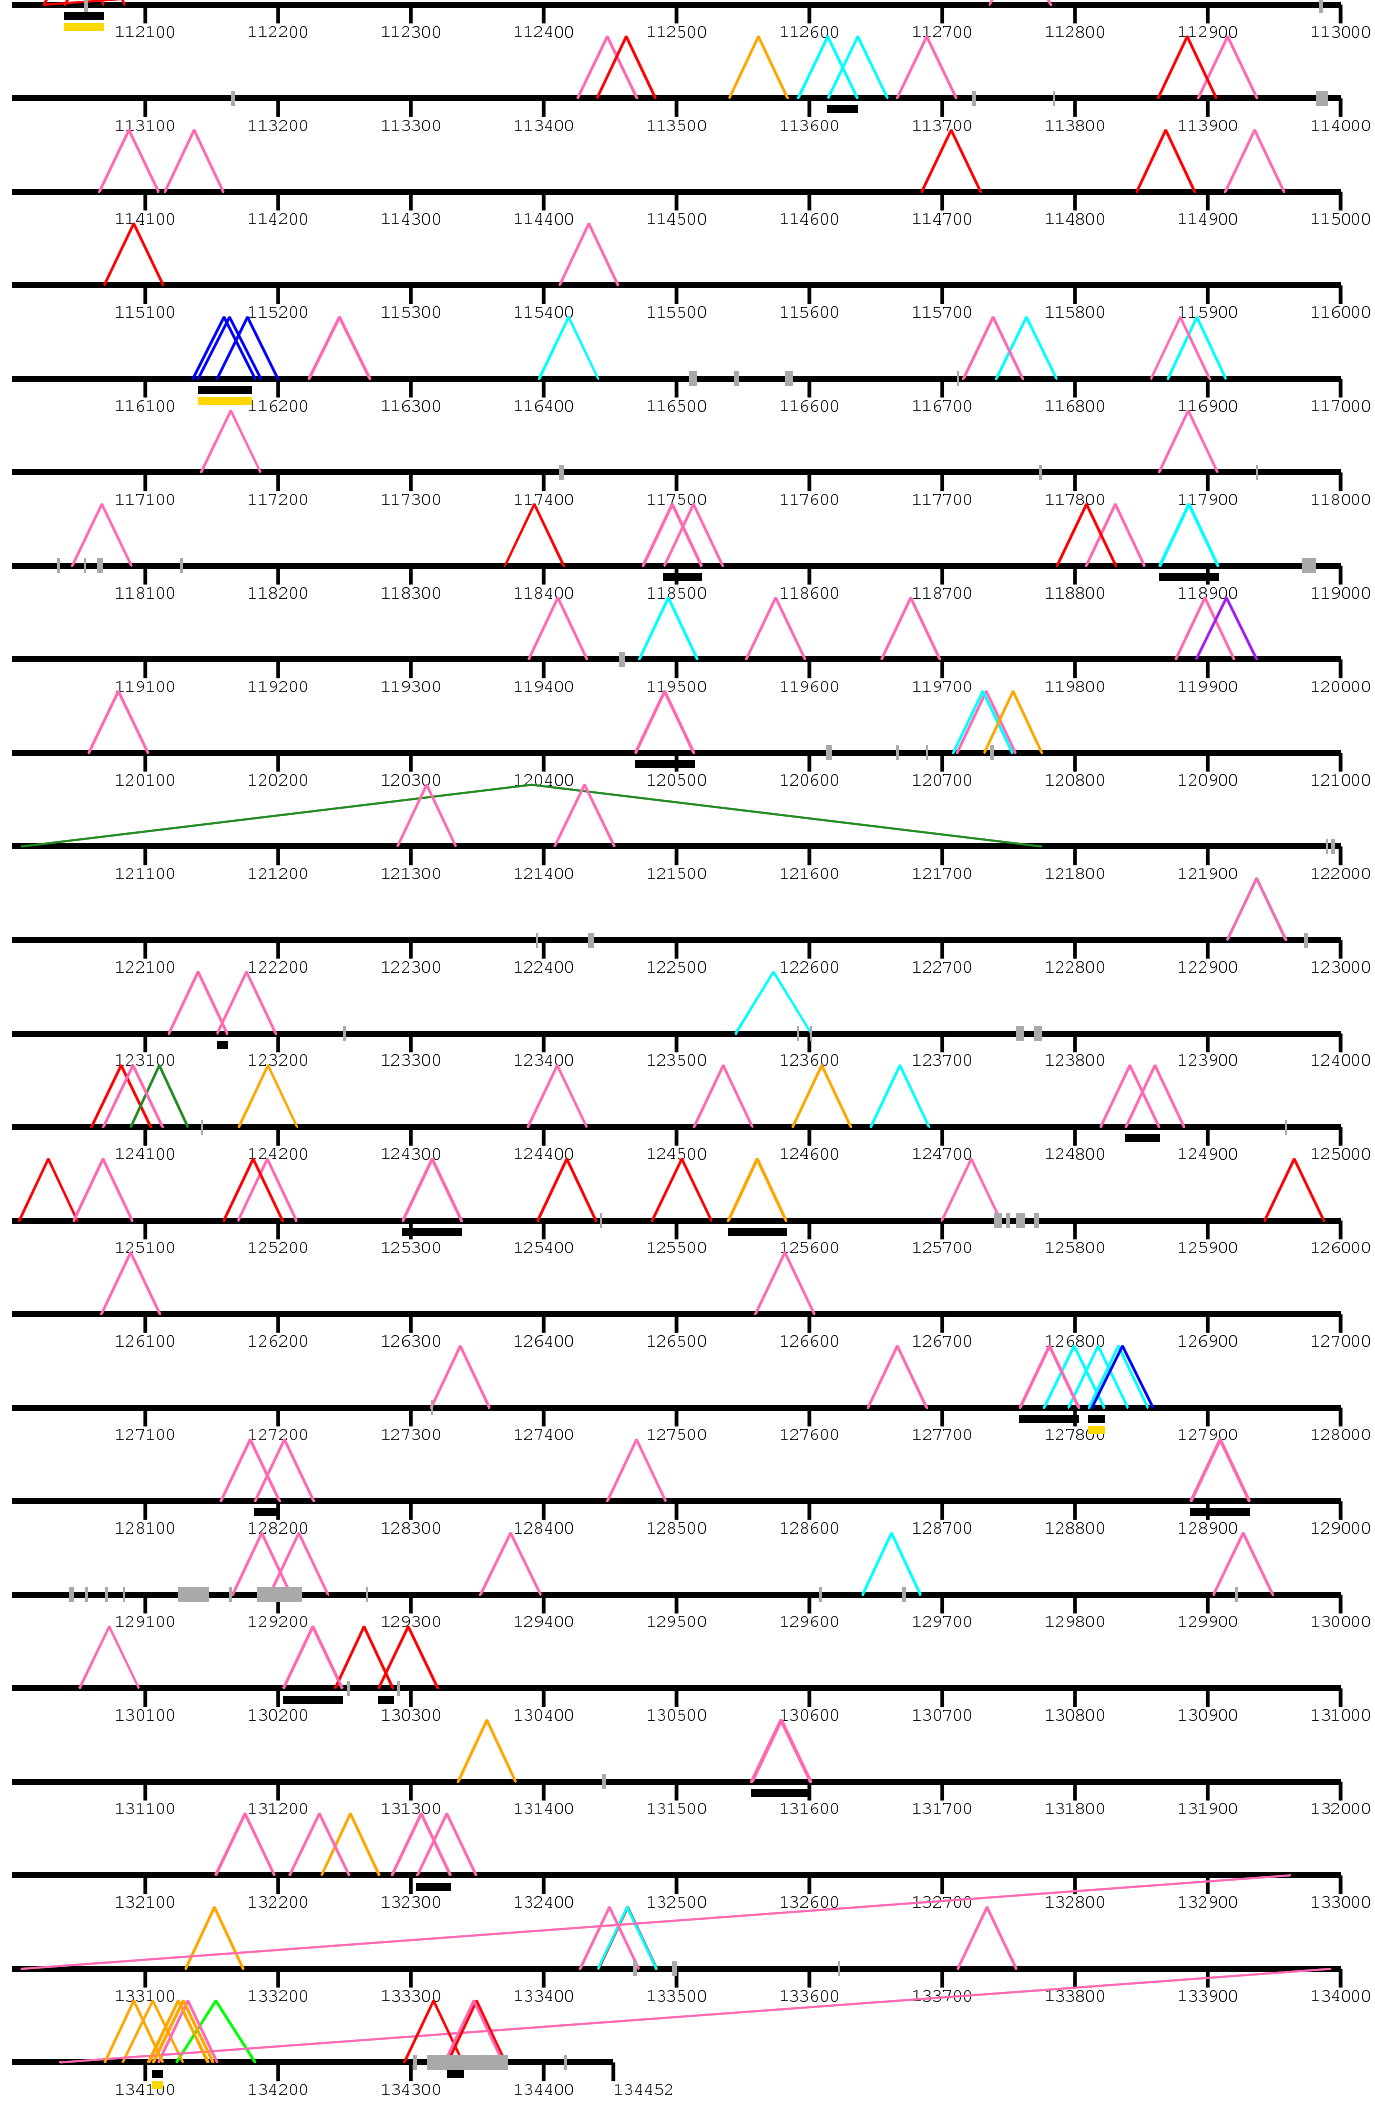

chr12

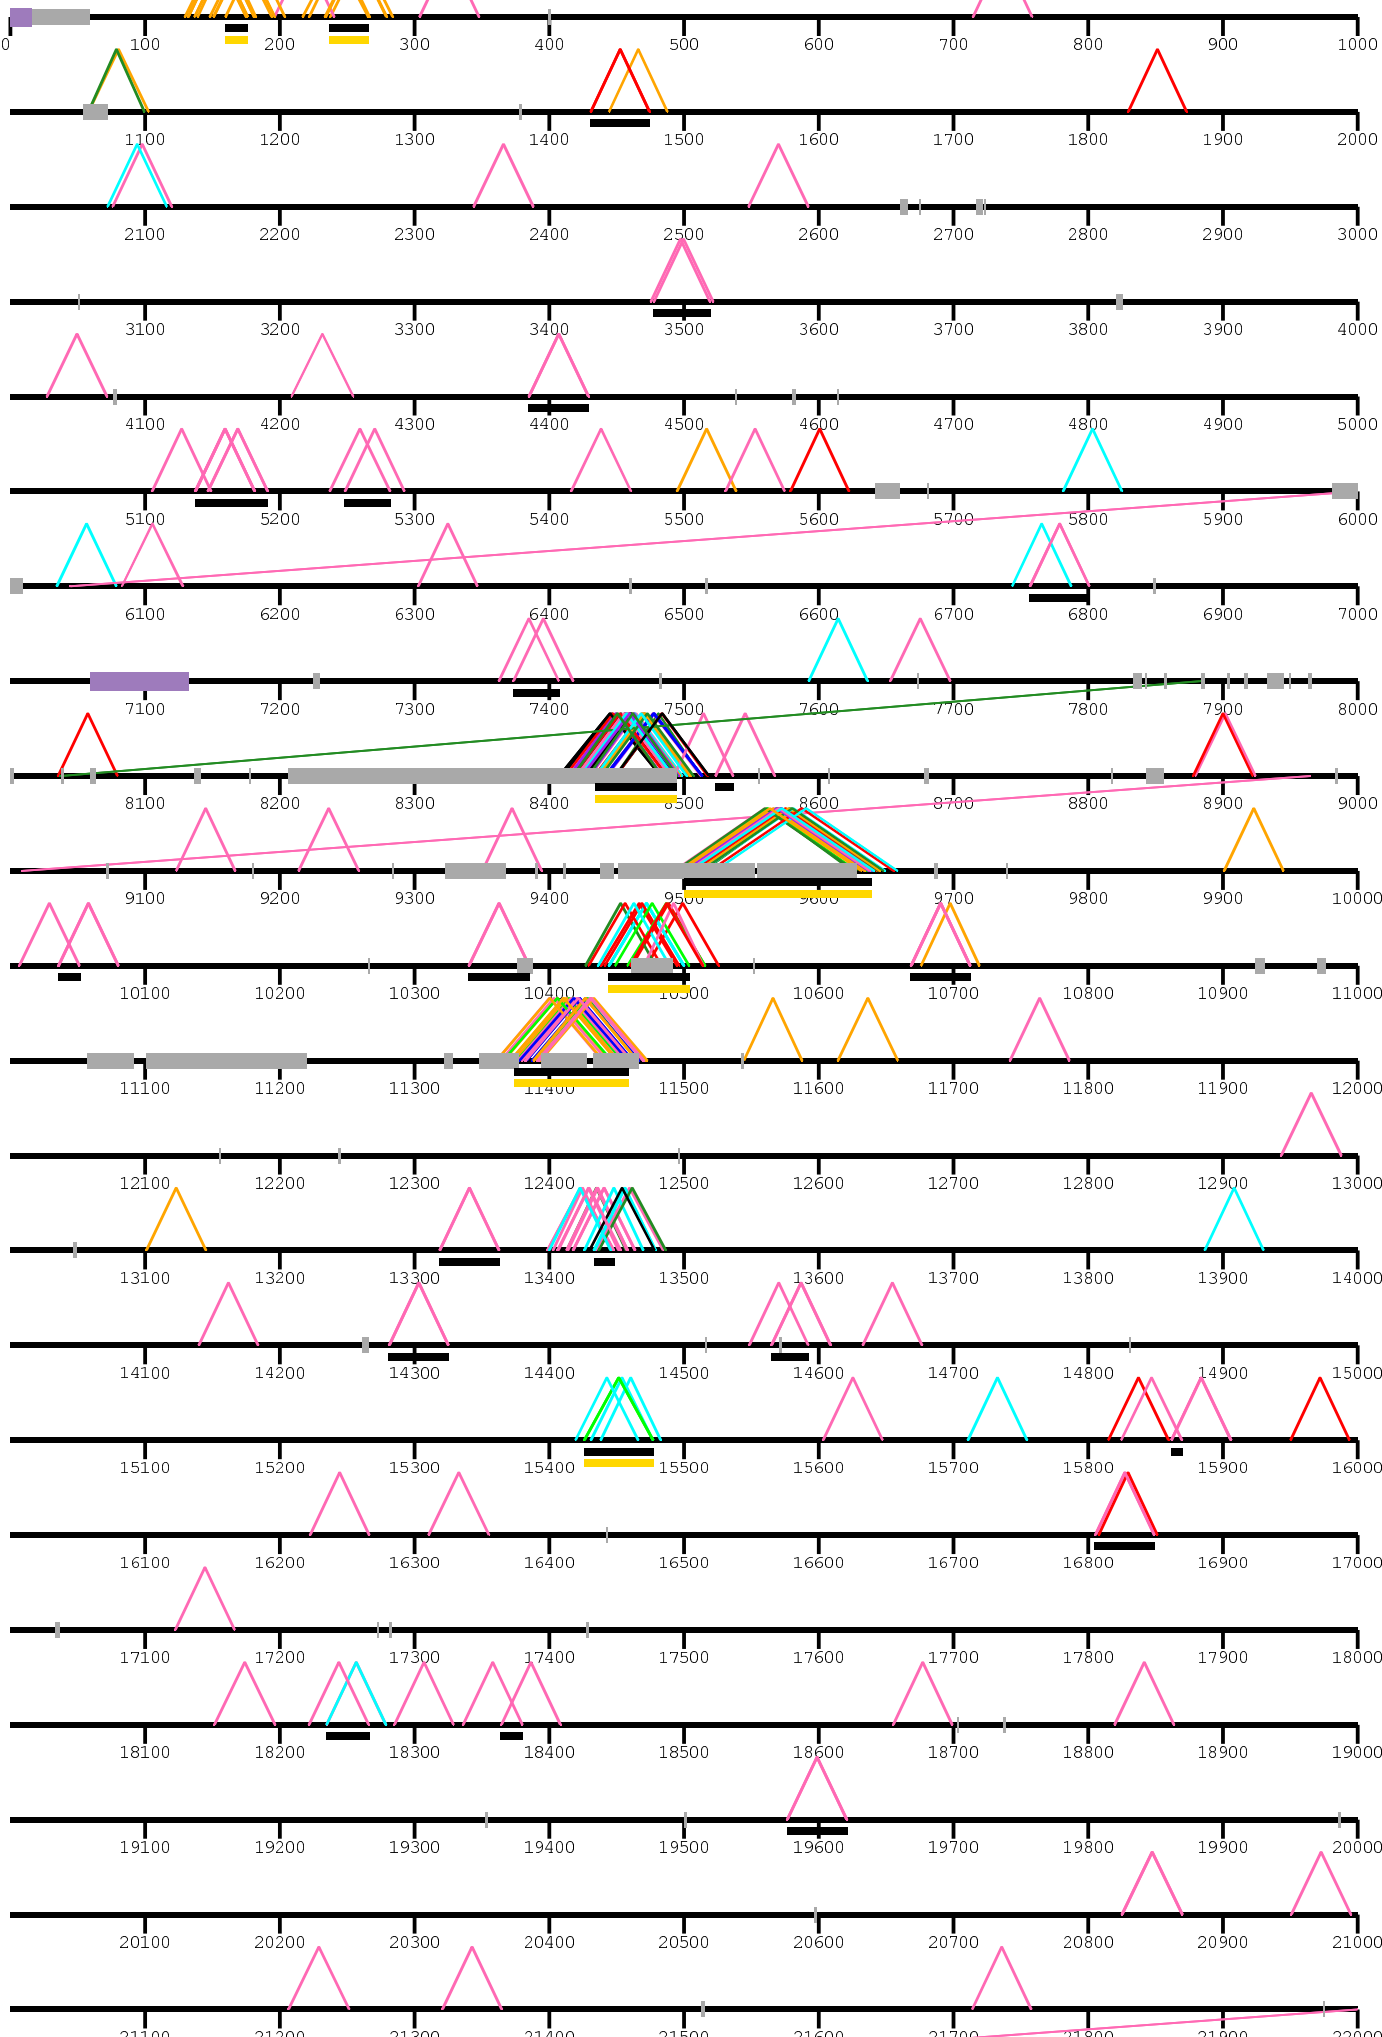

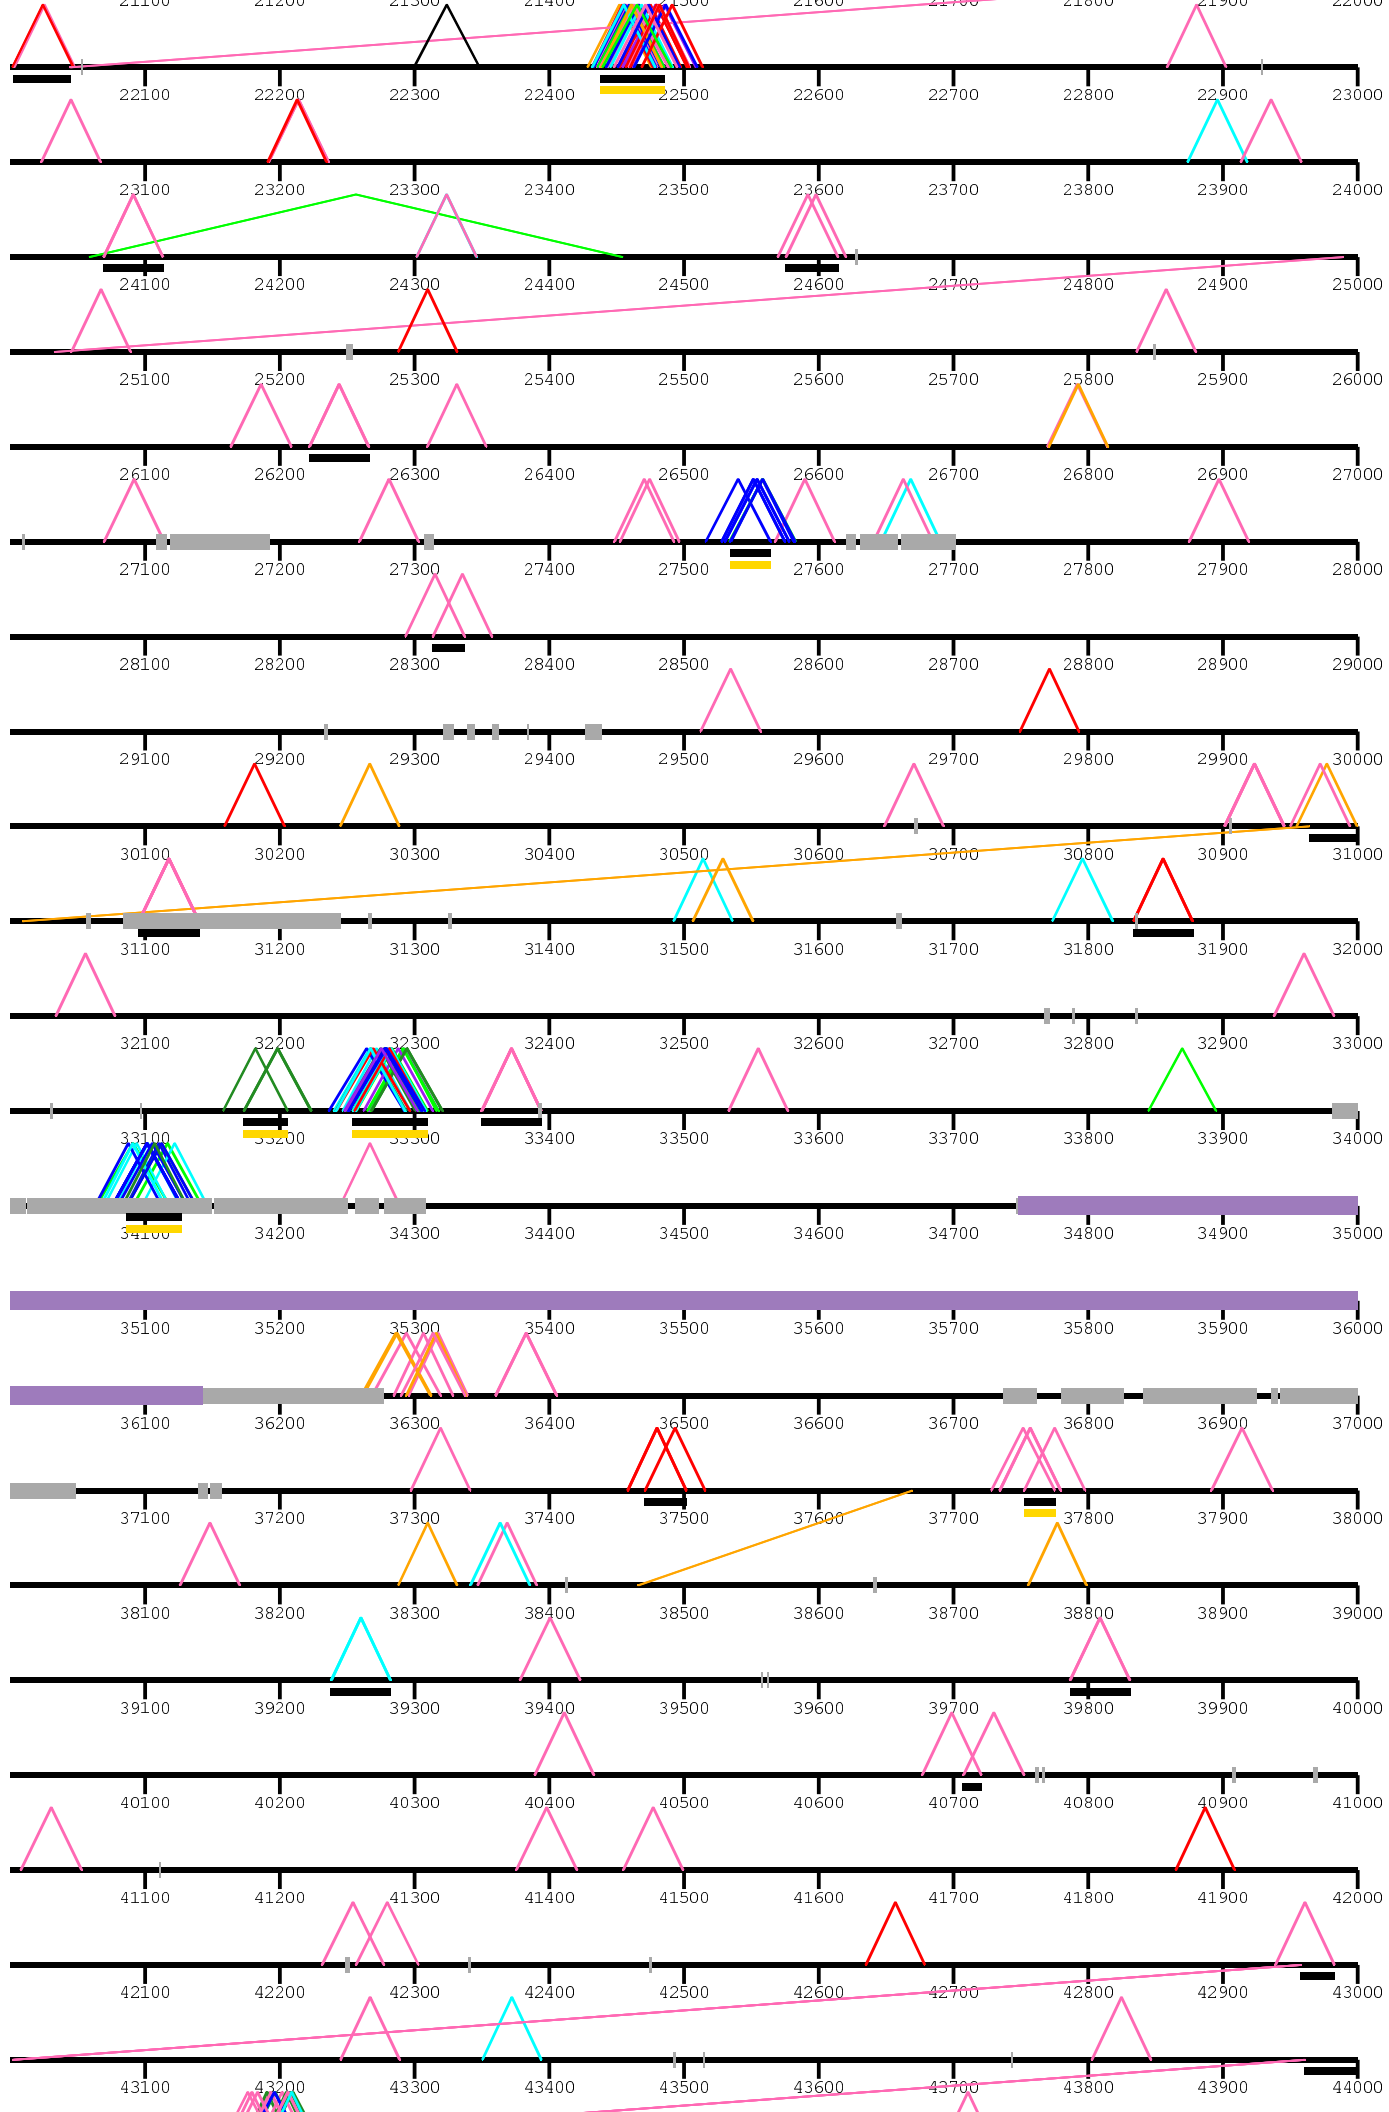

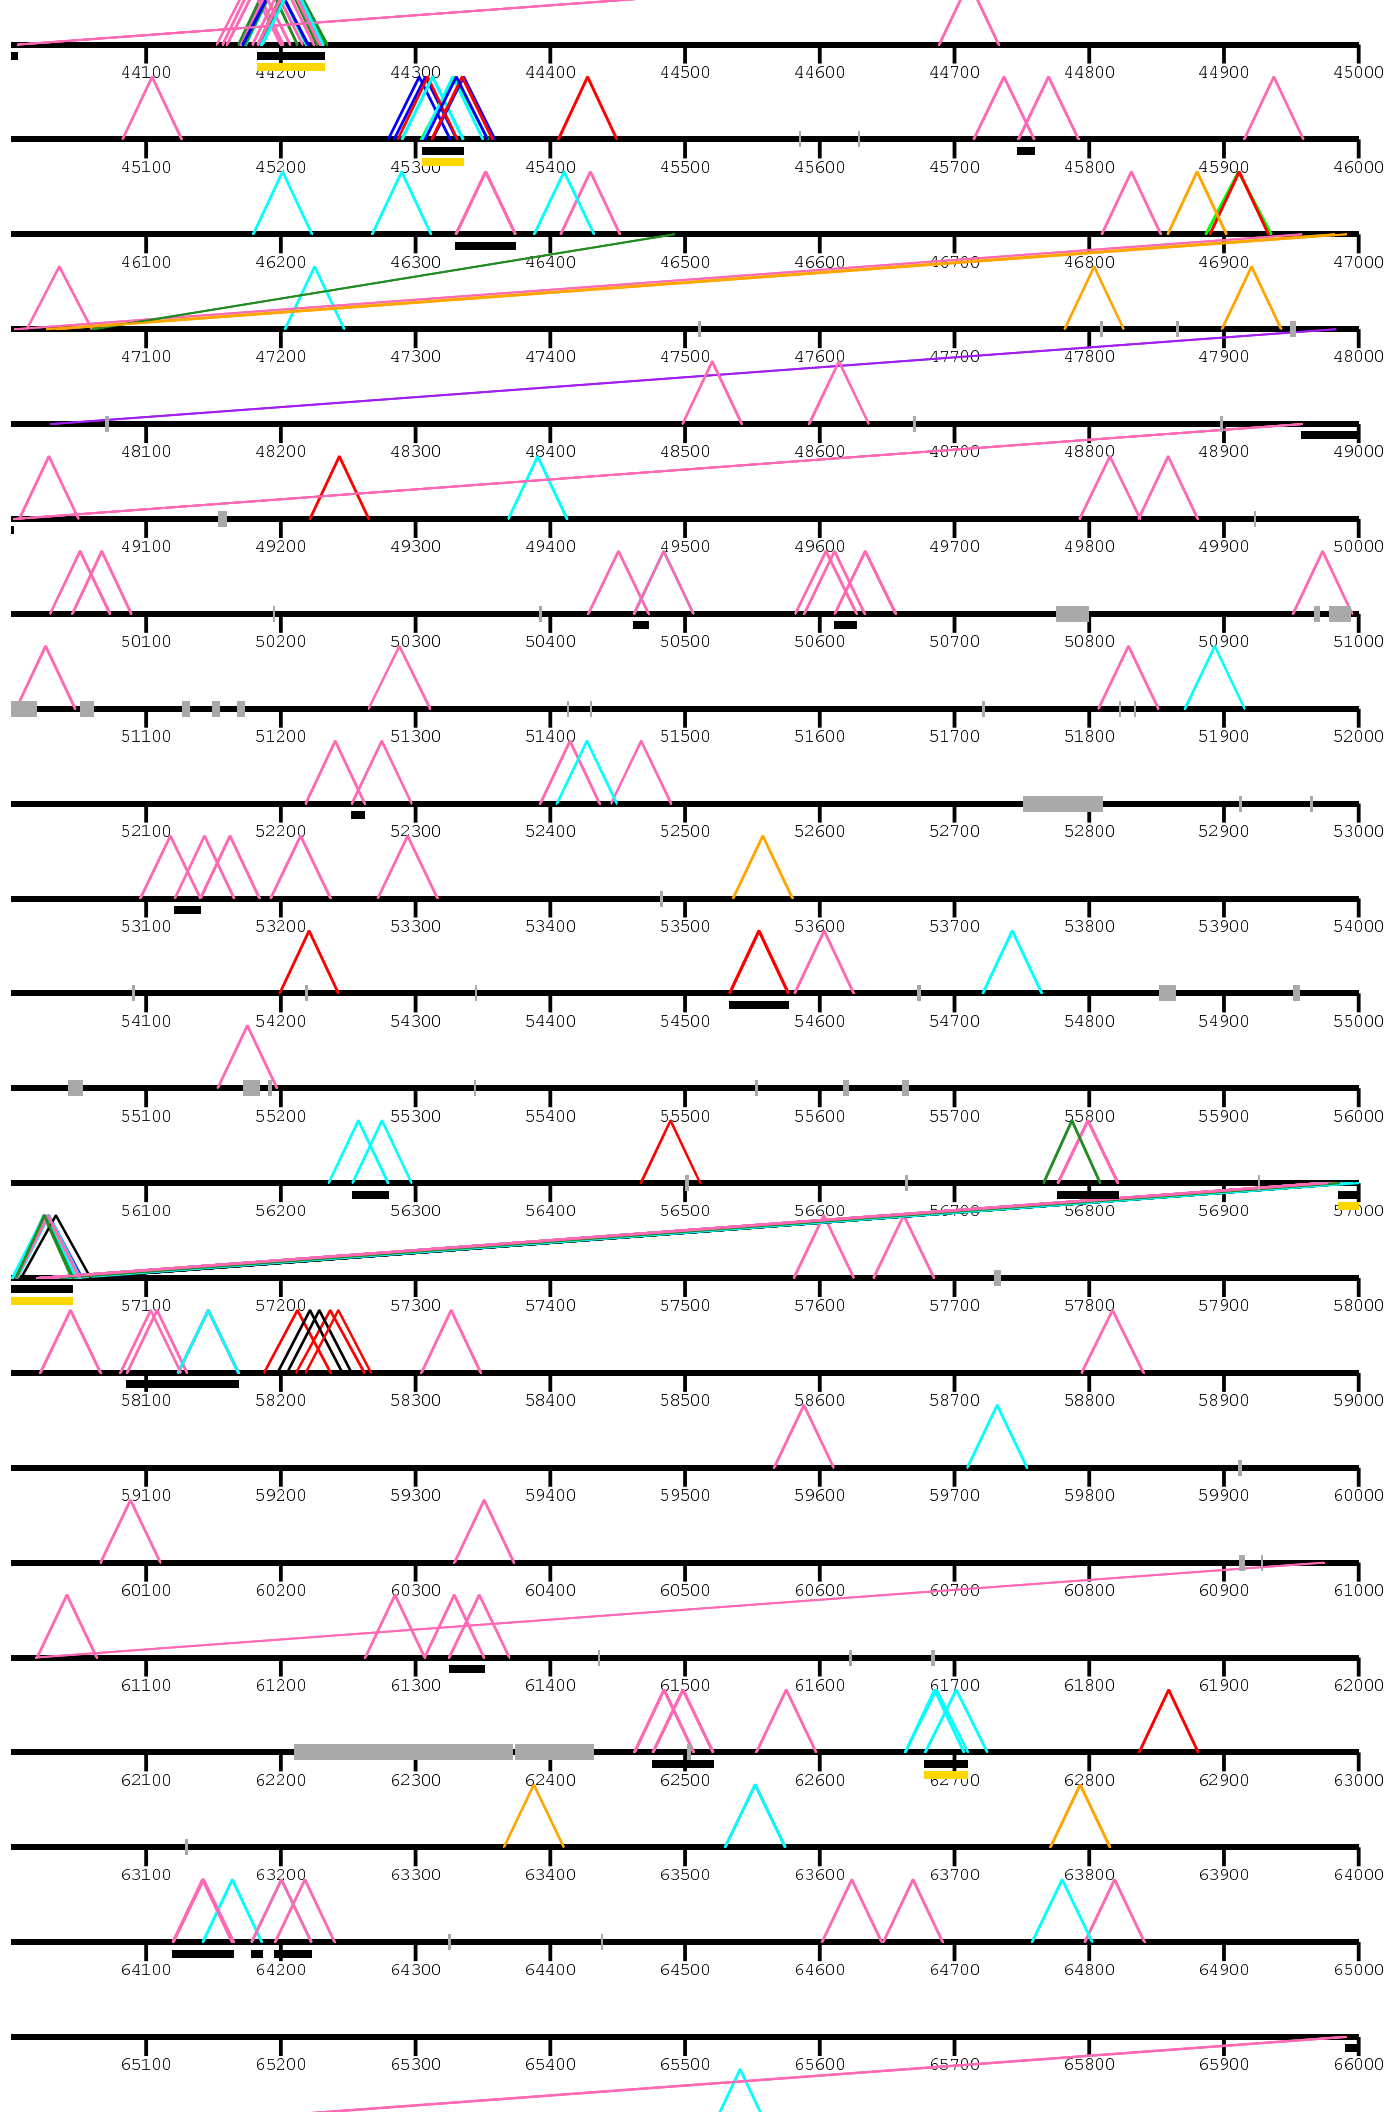

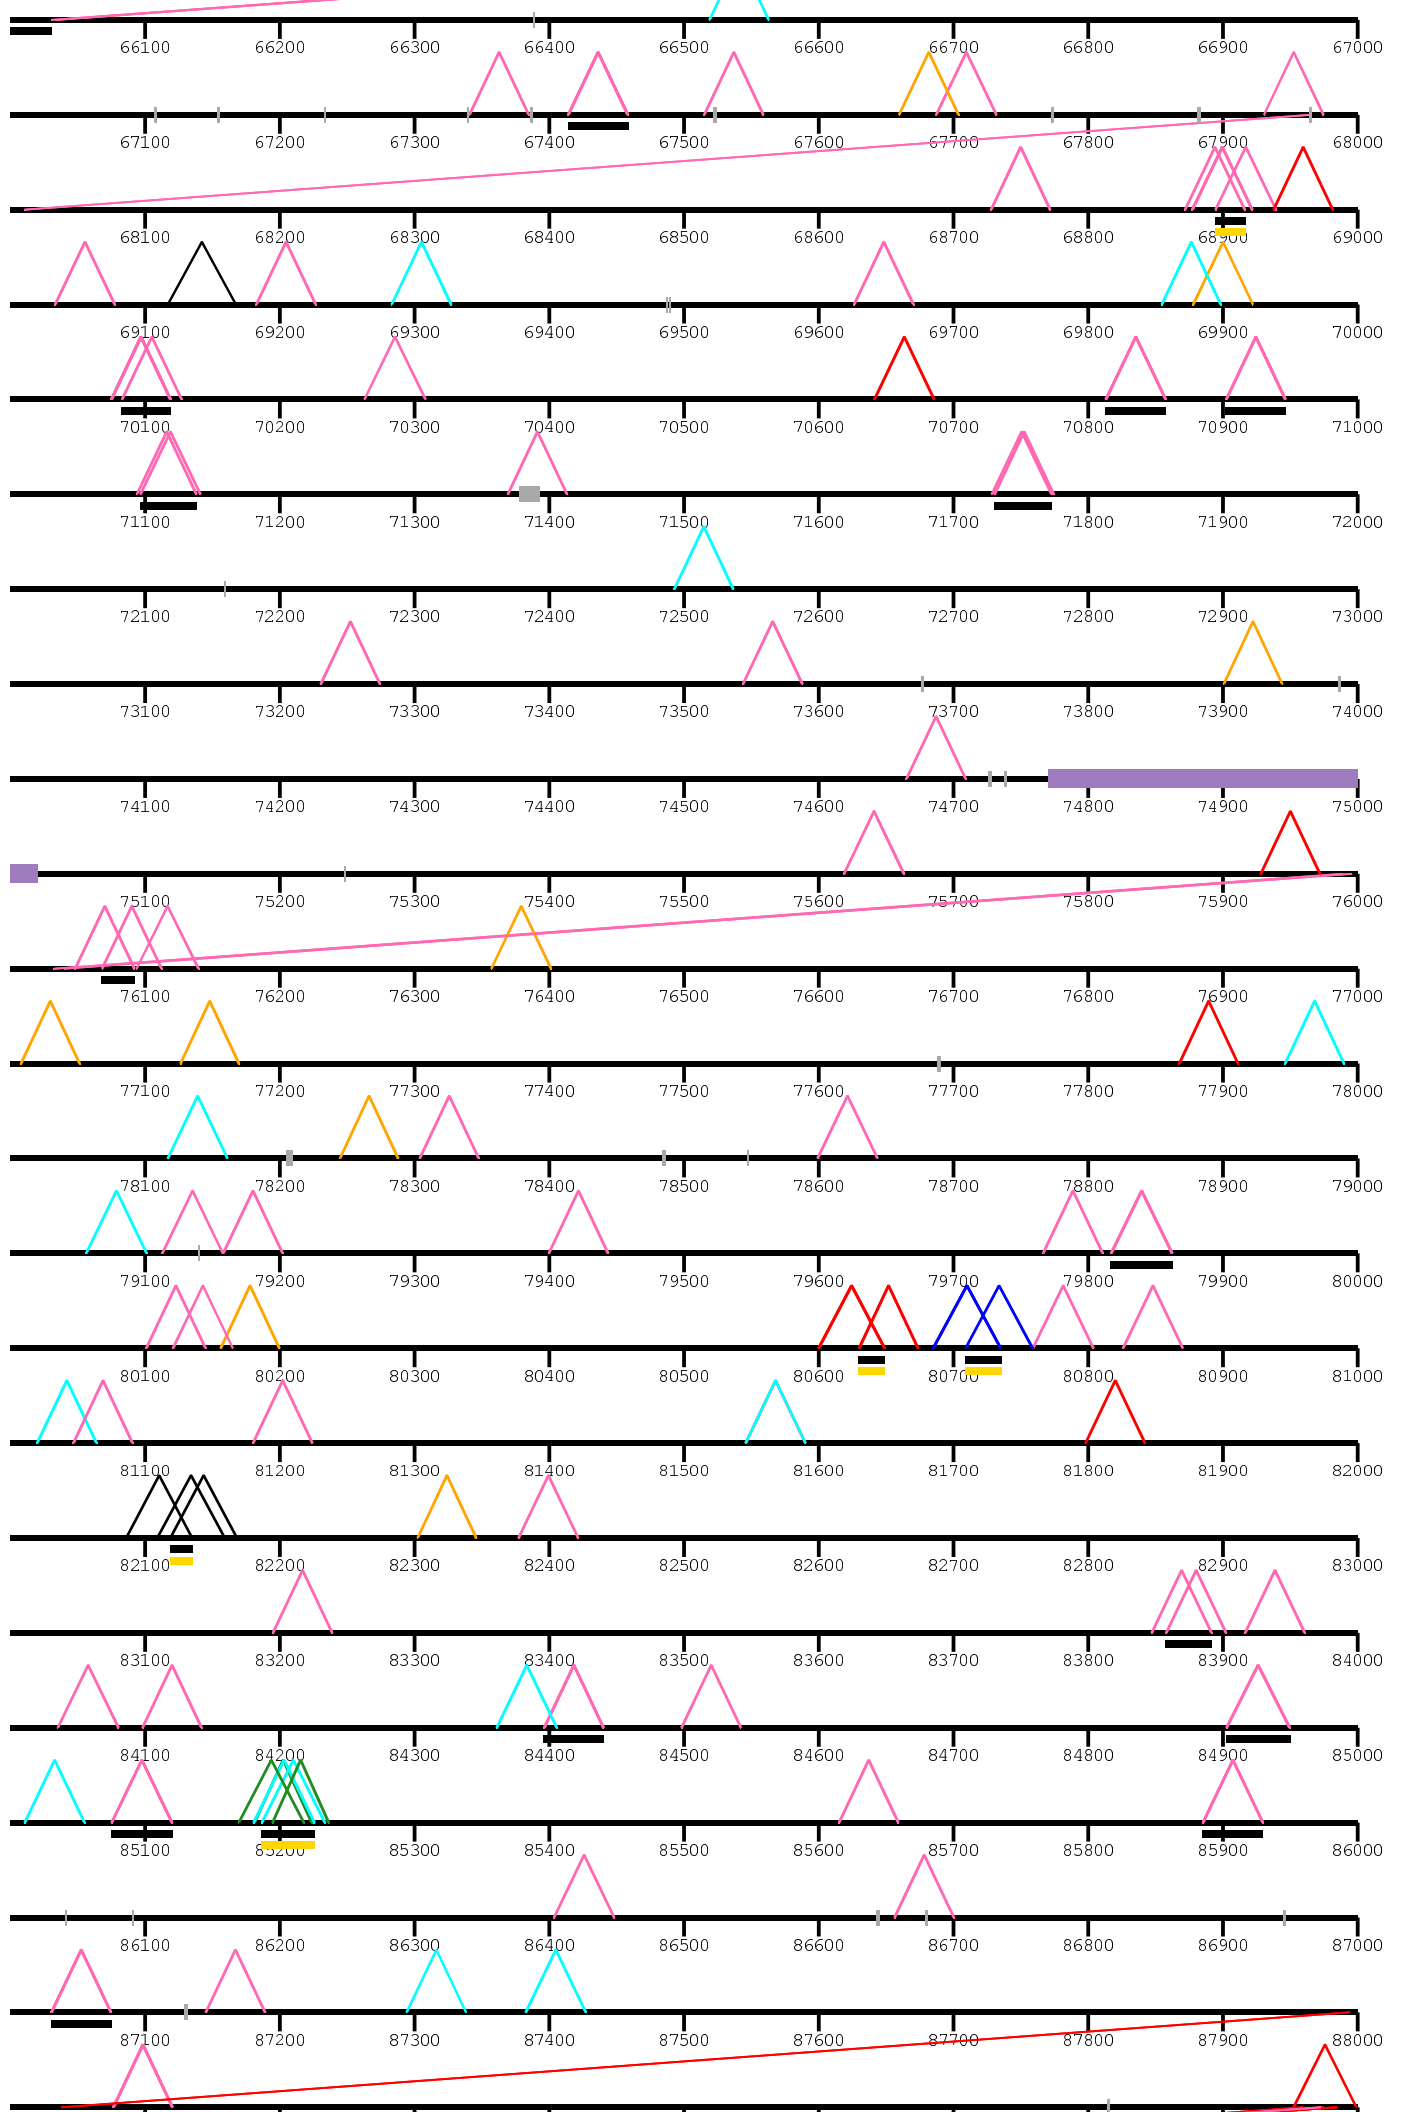

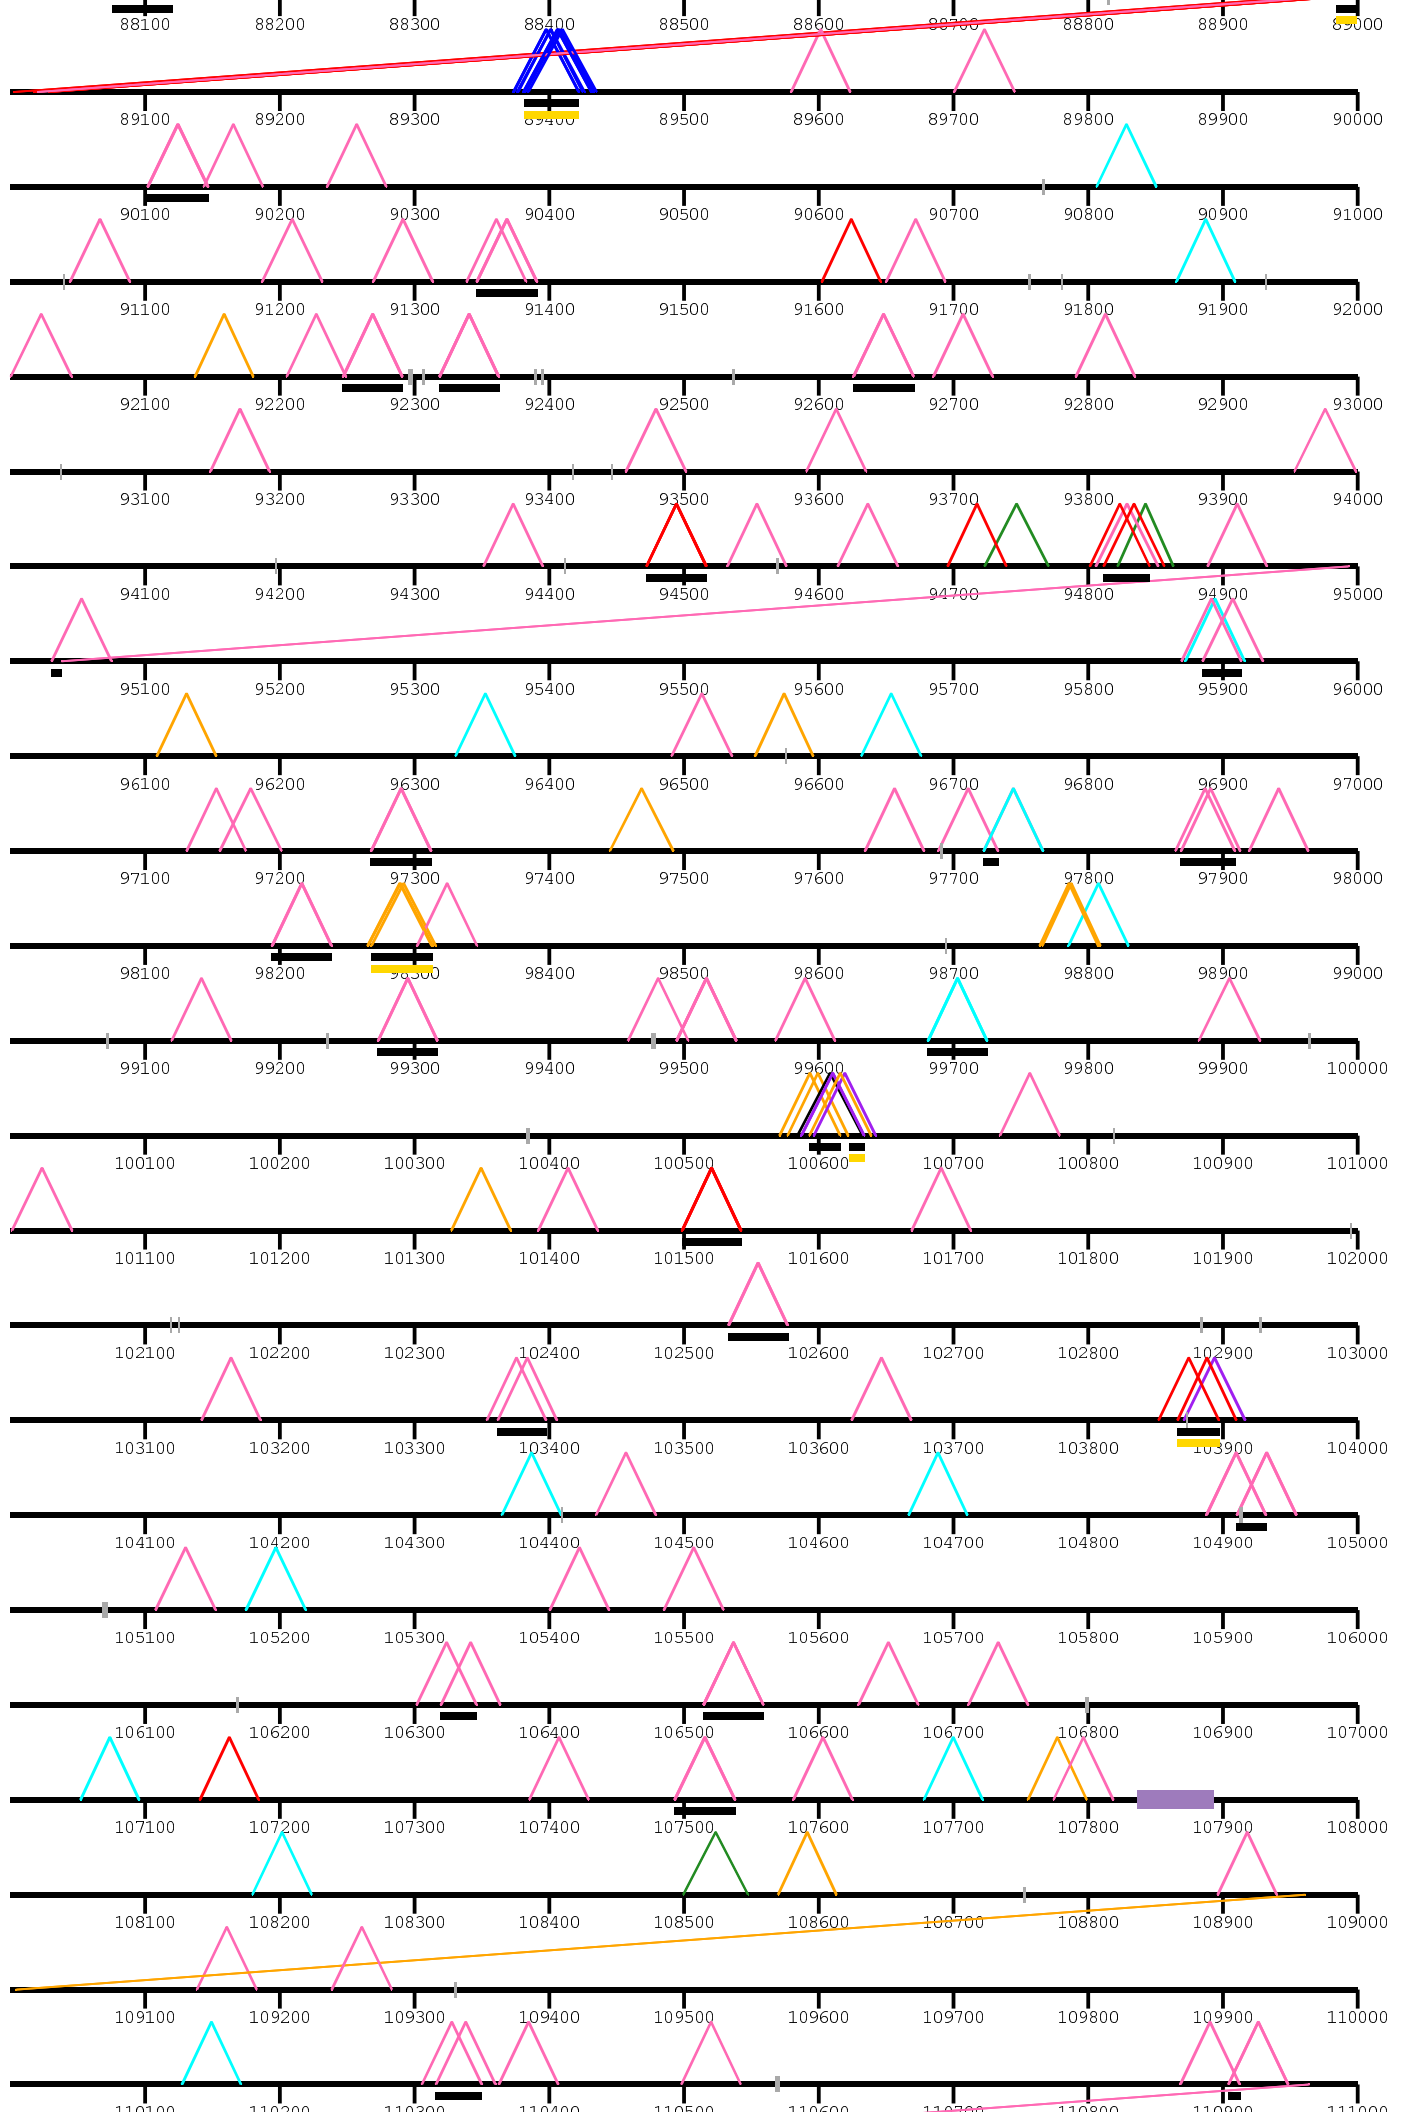



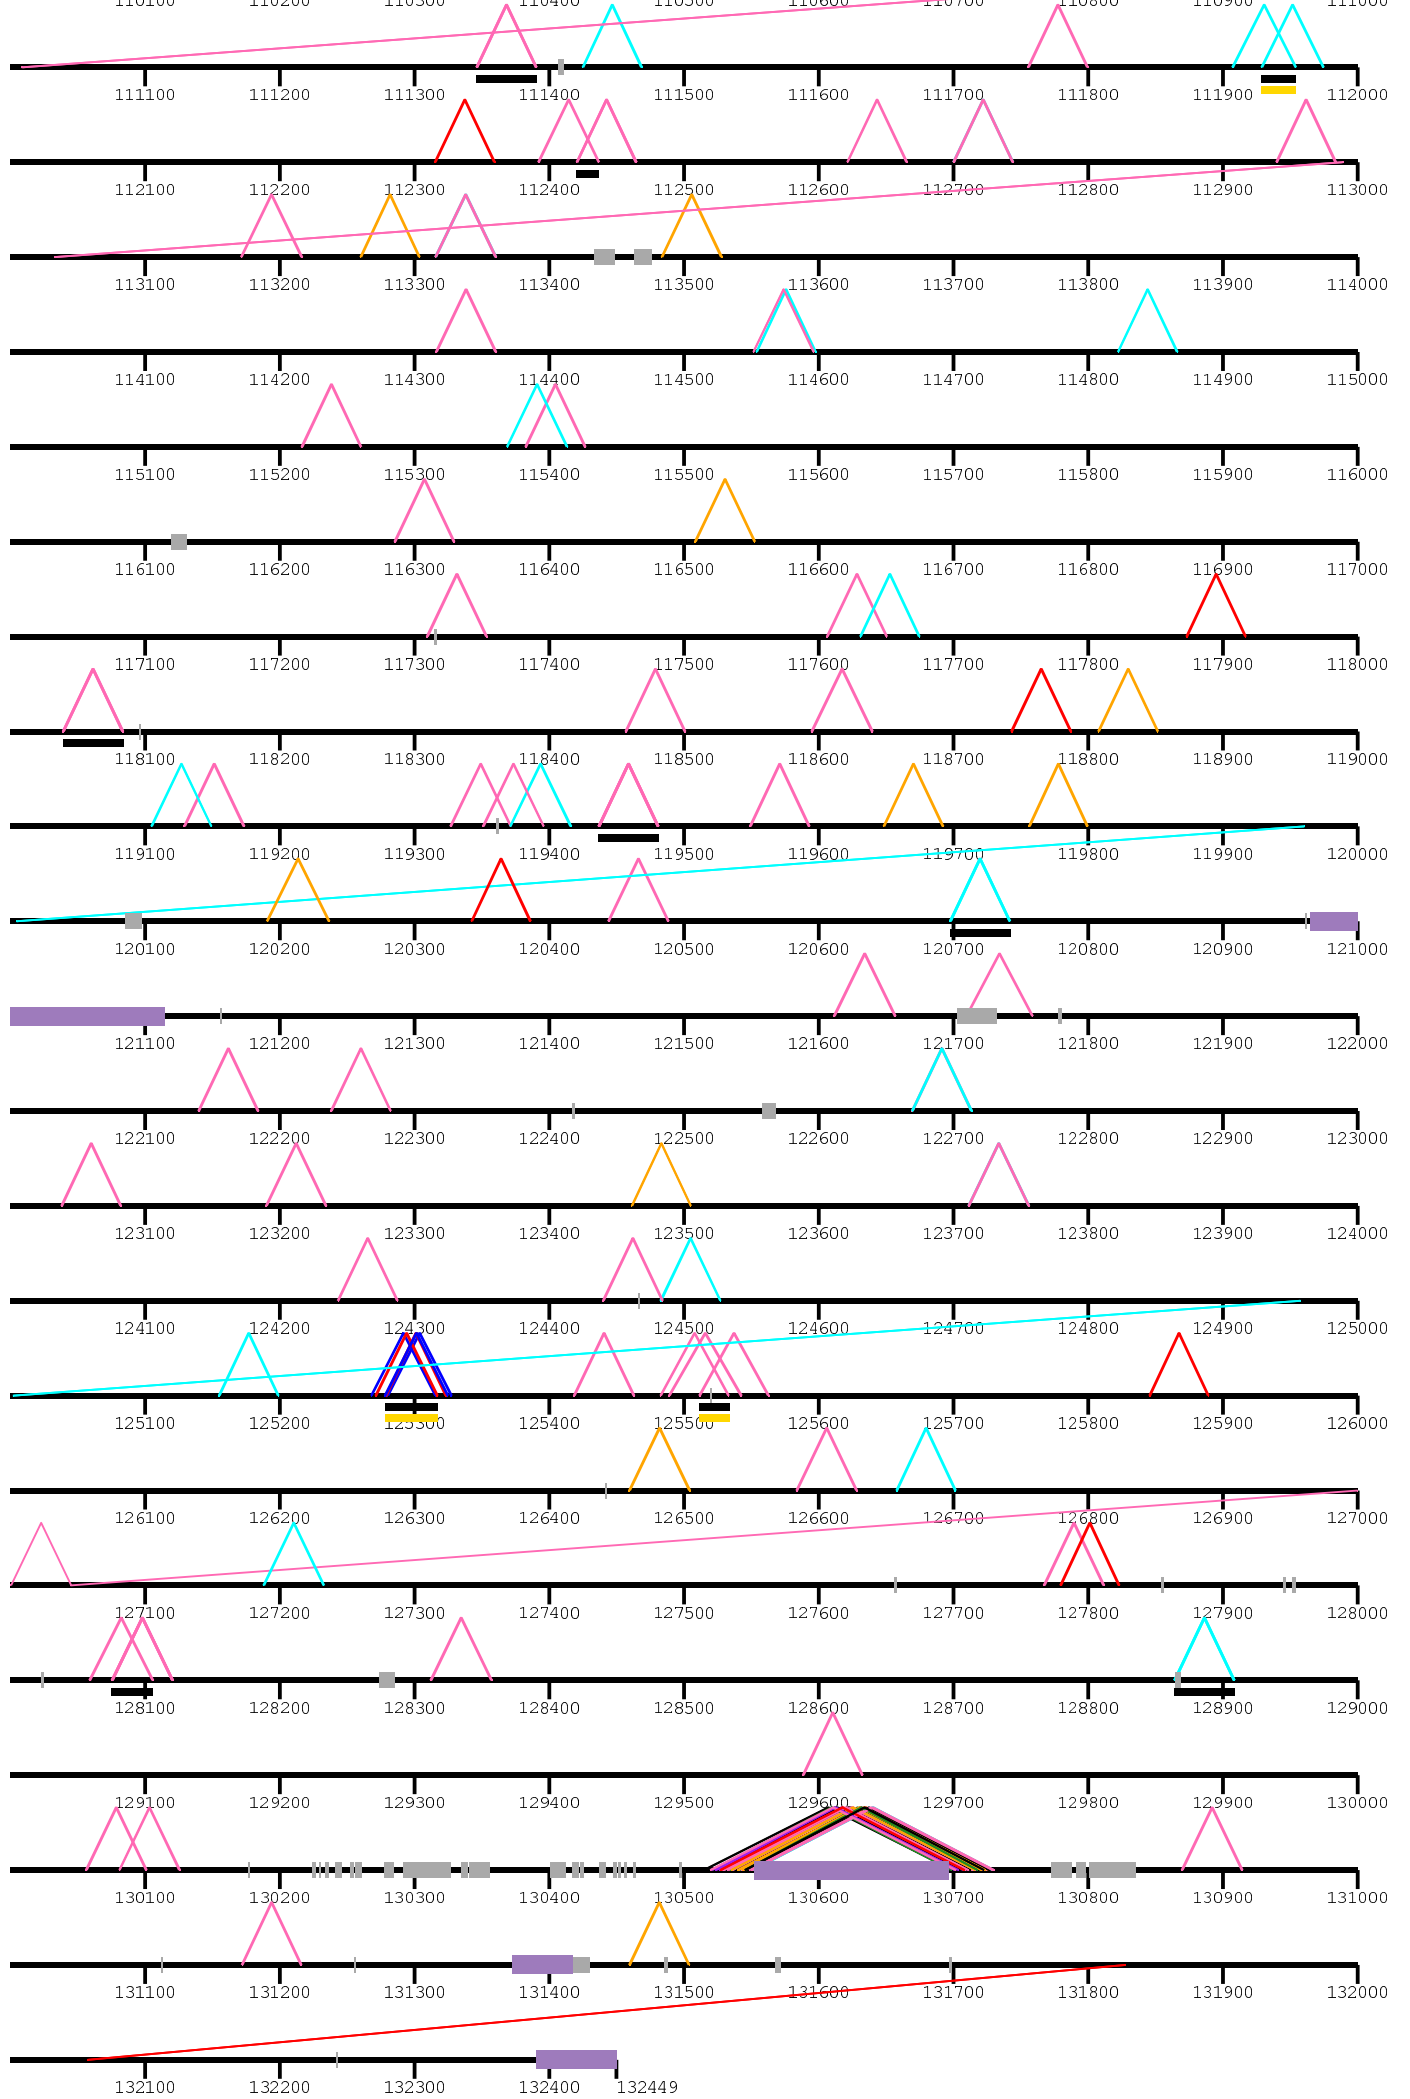

chr13

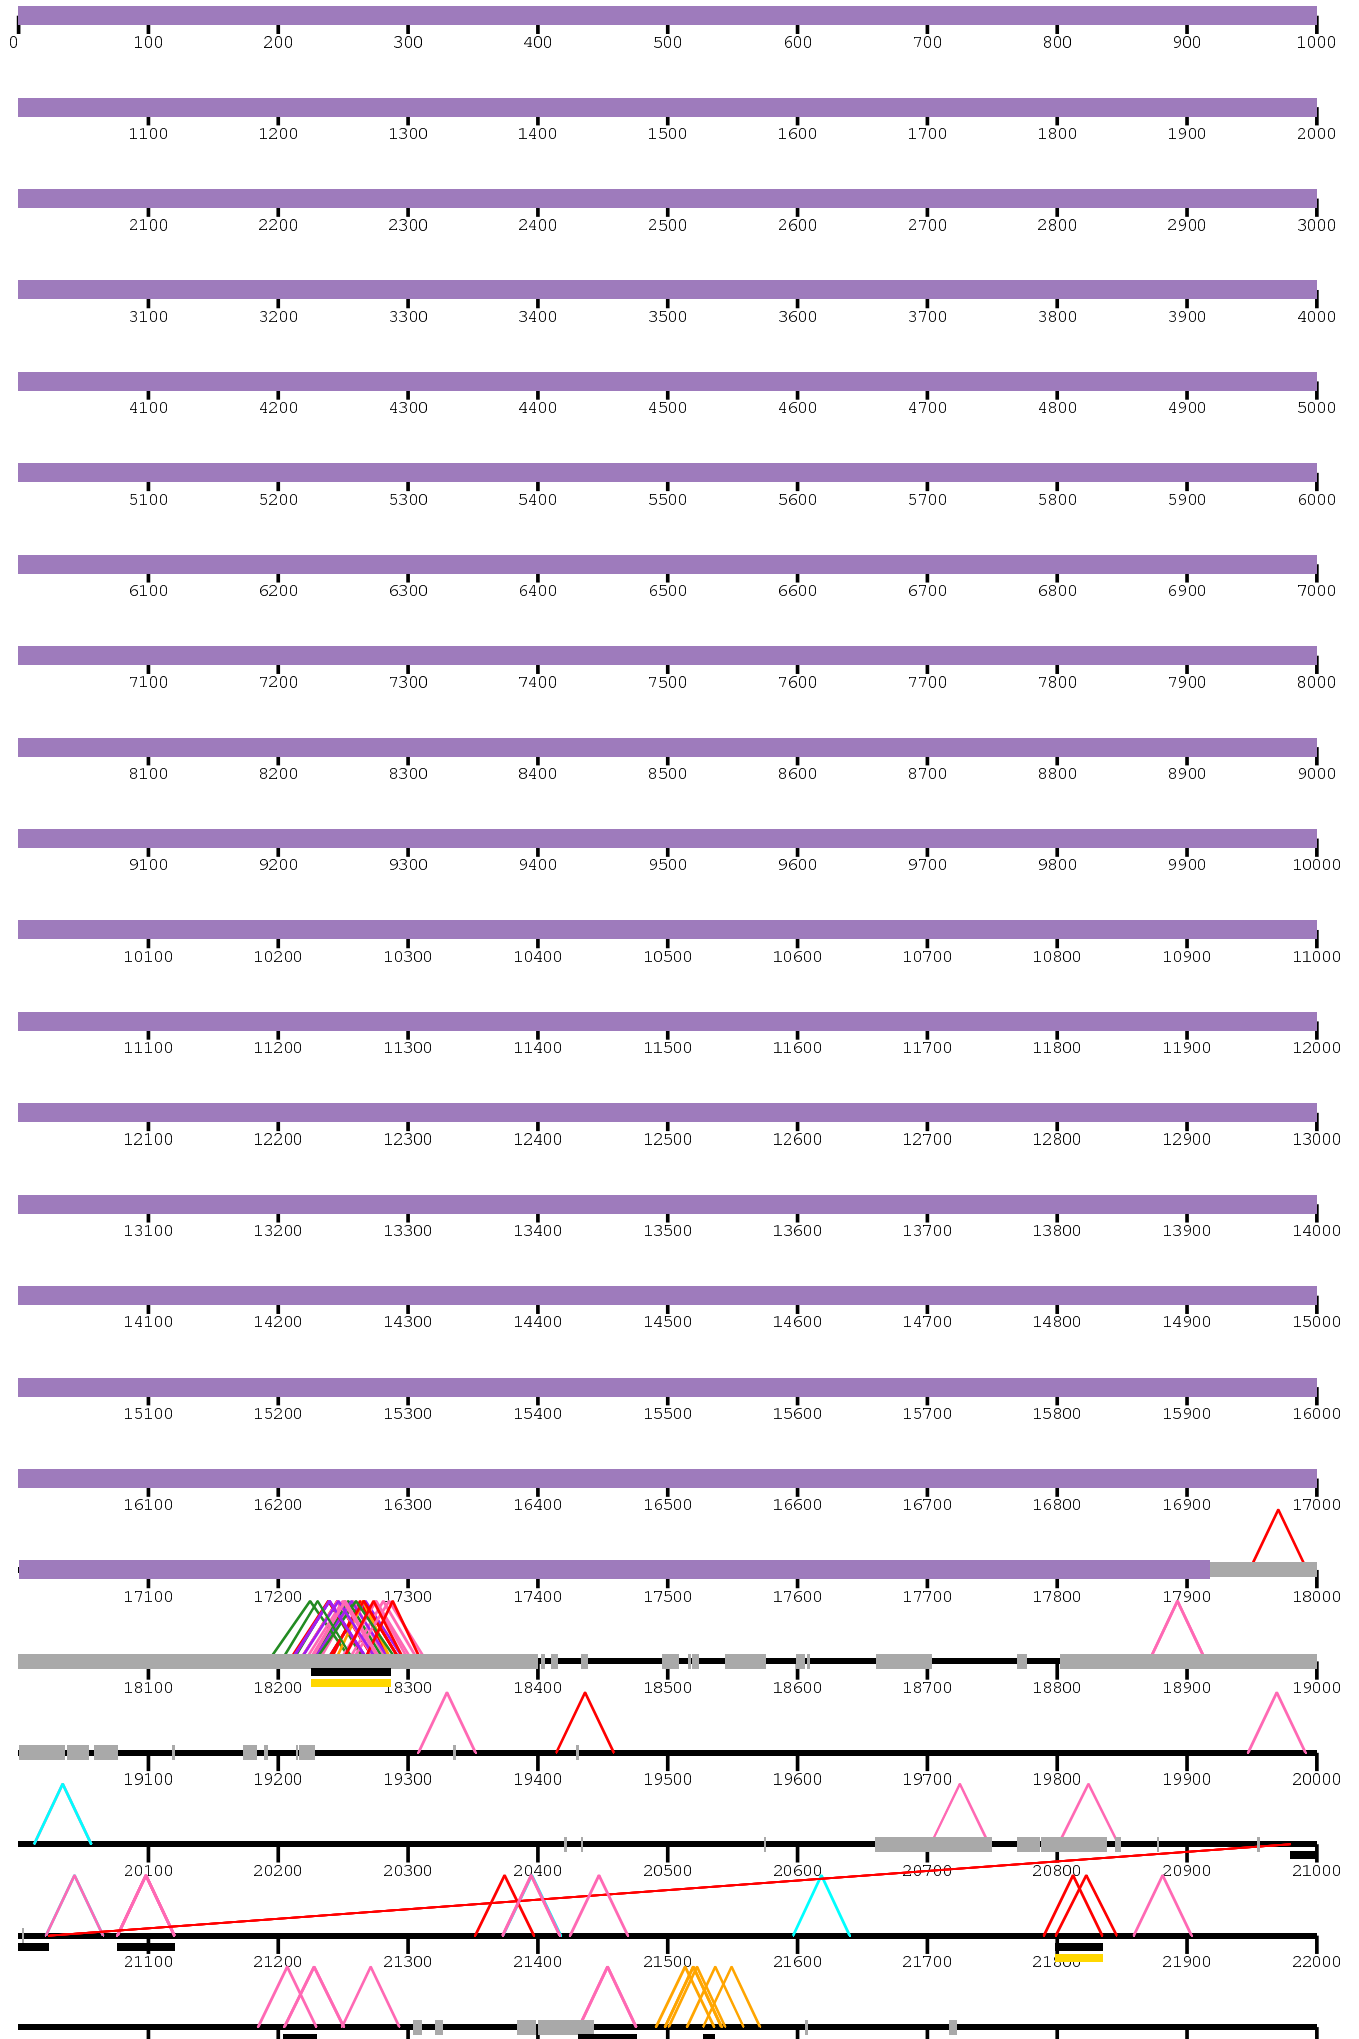

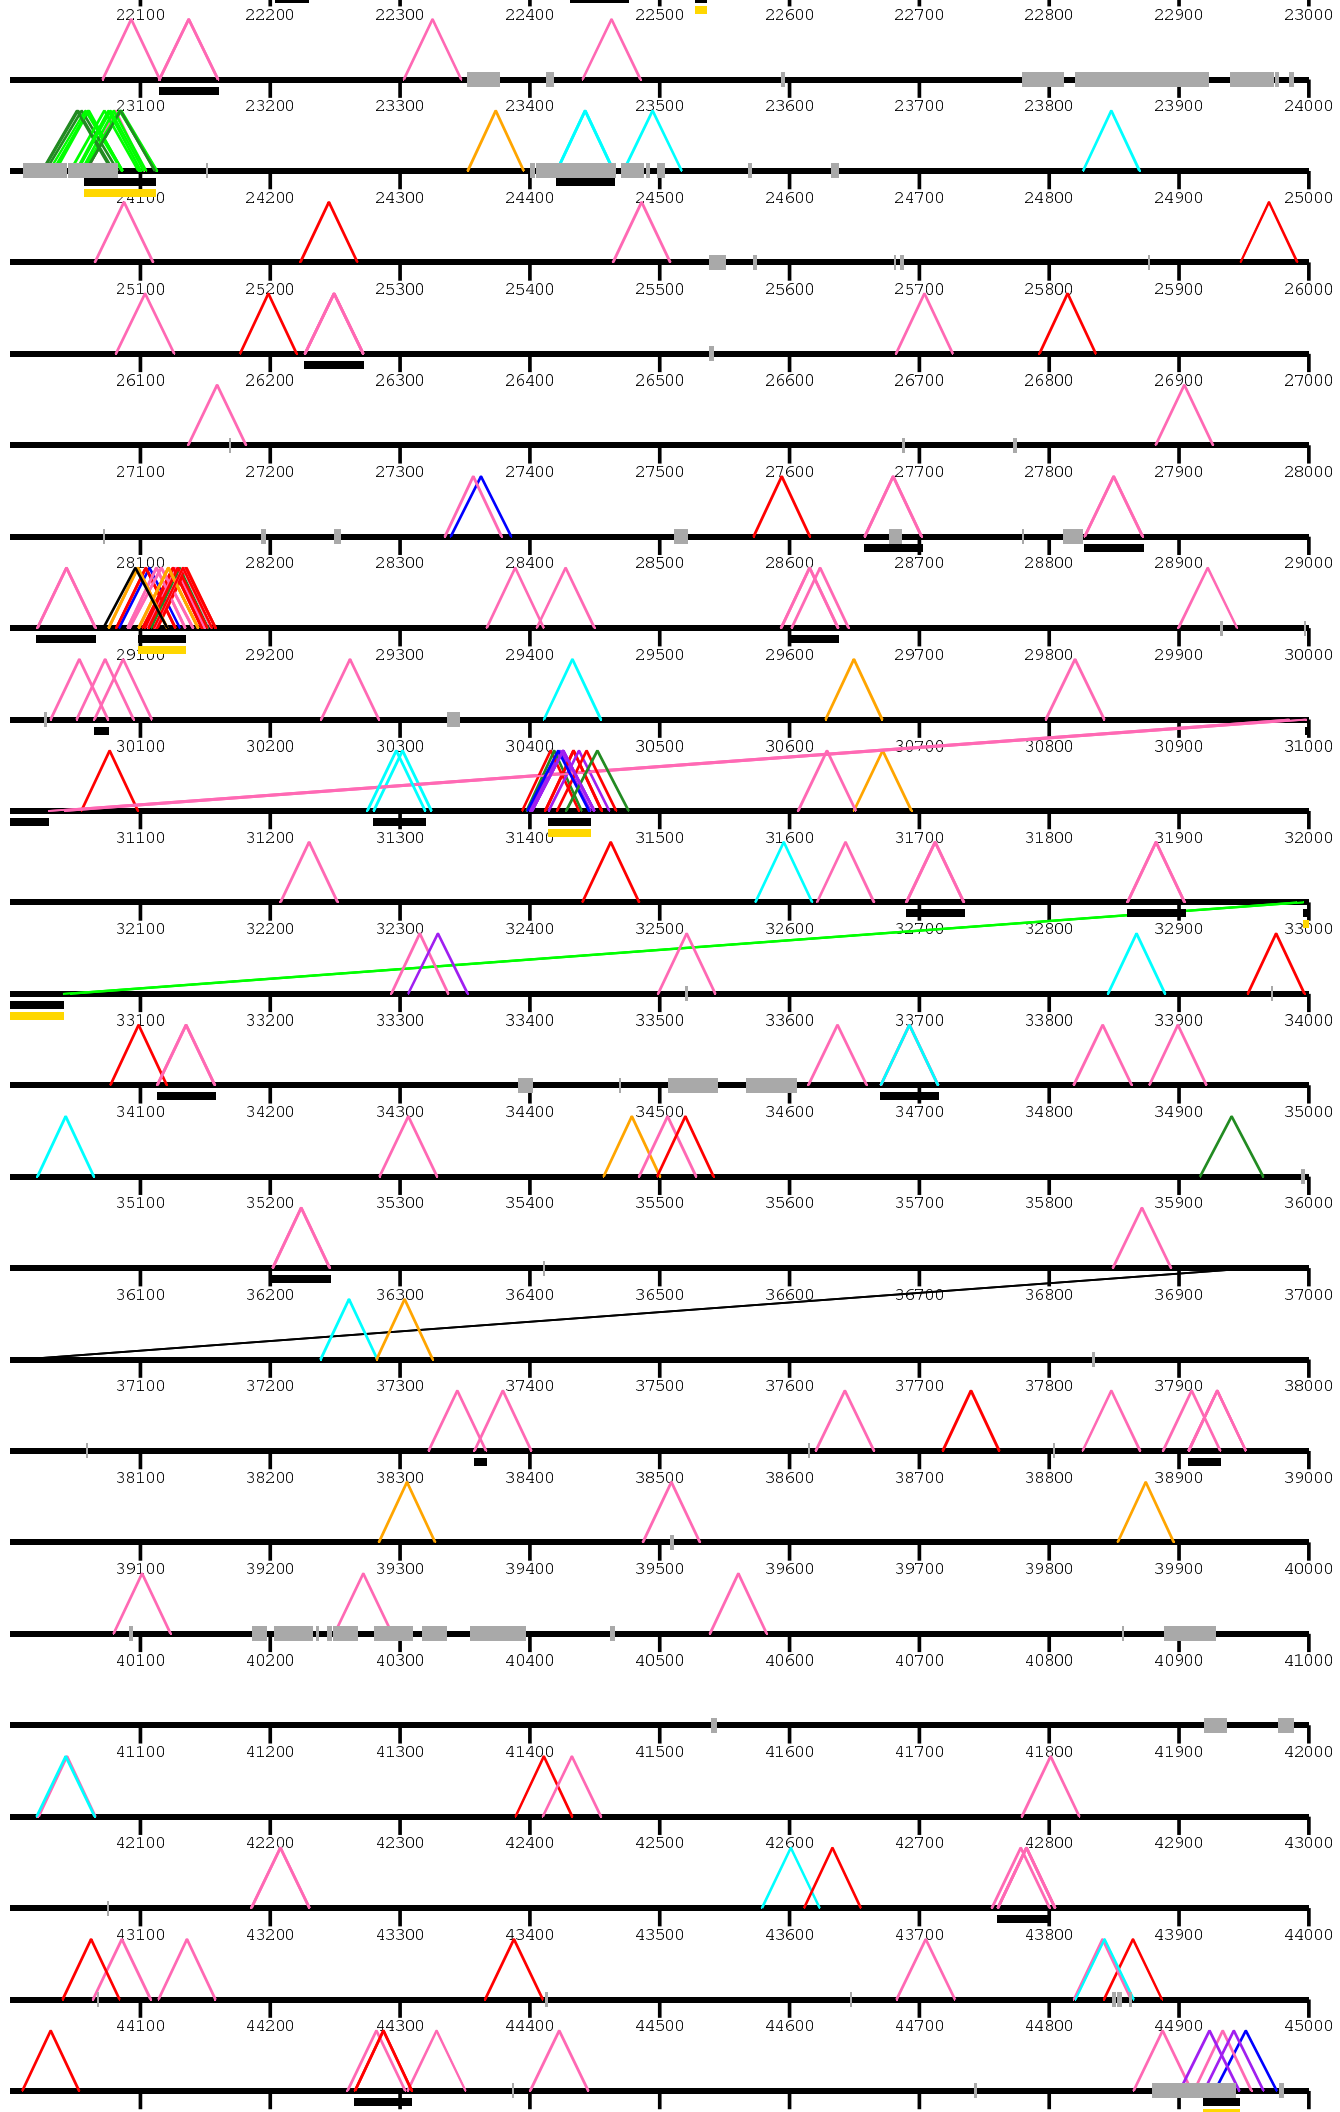

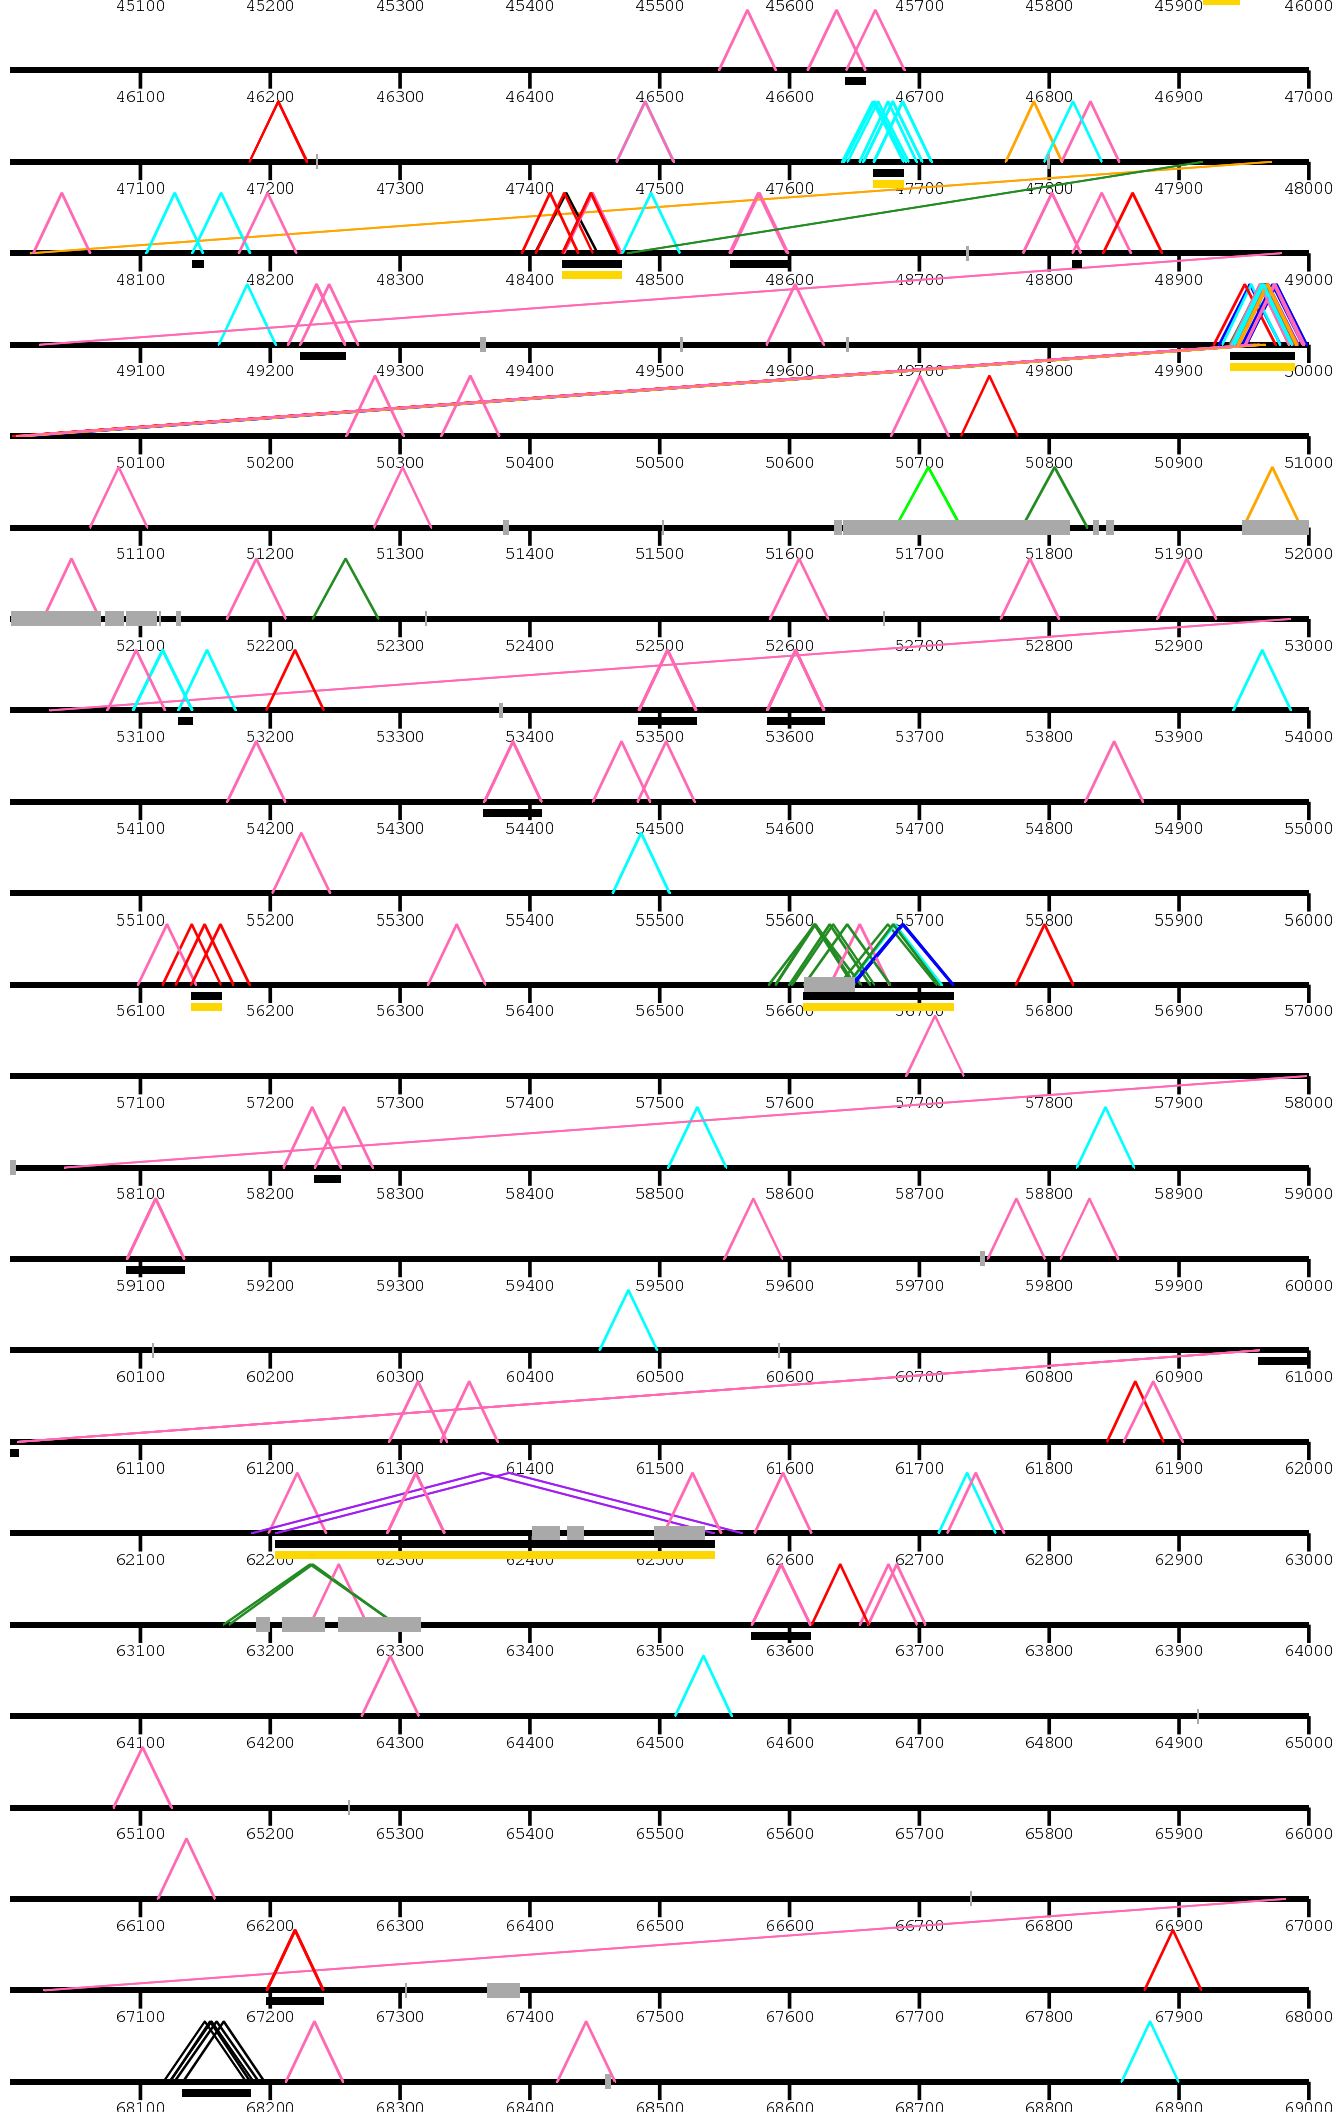

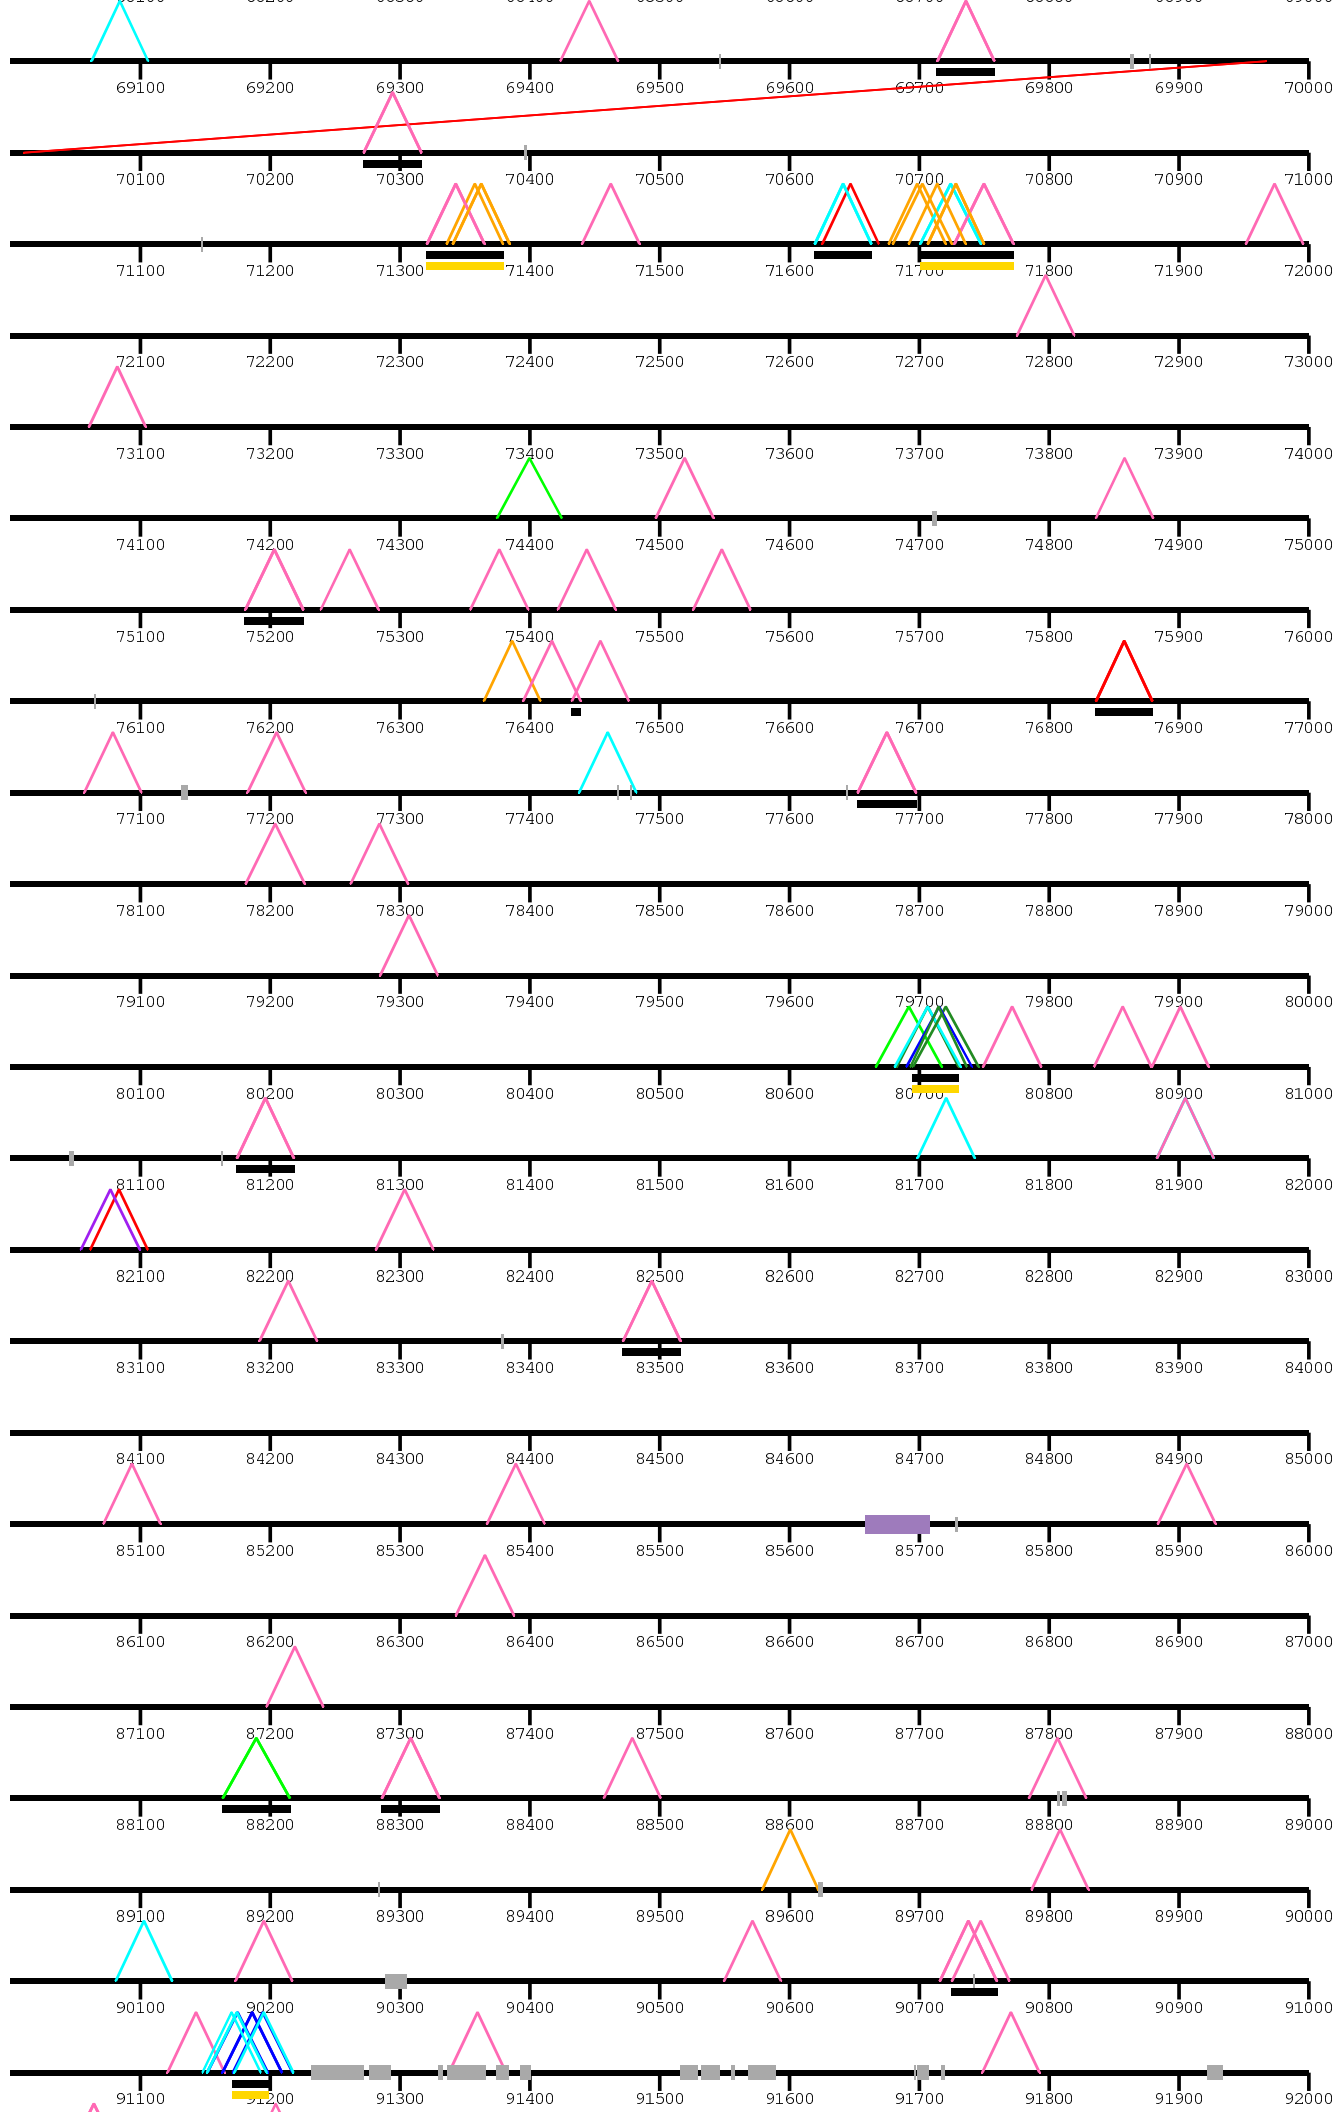

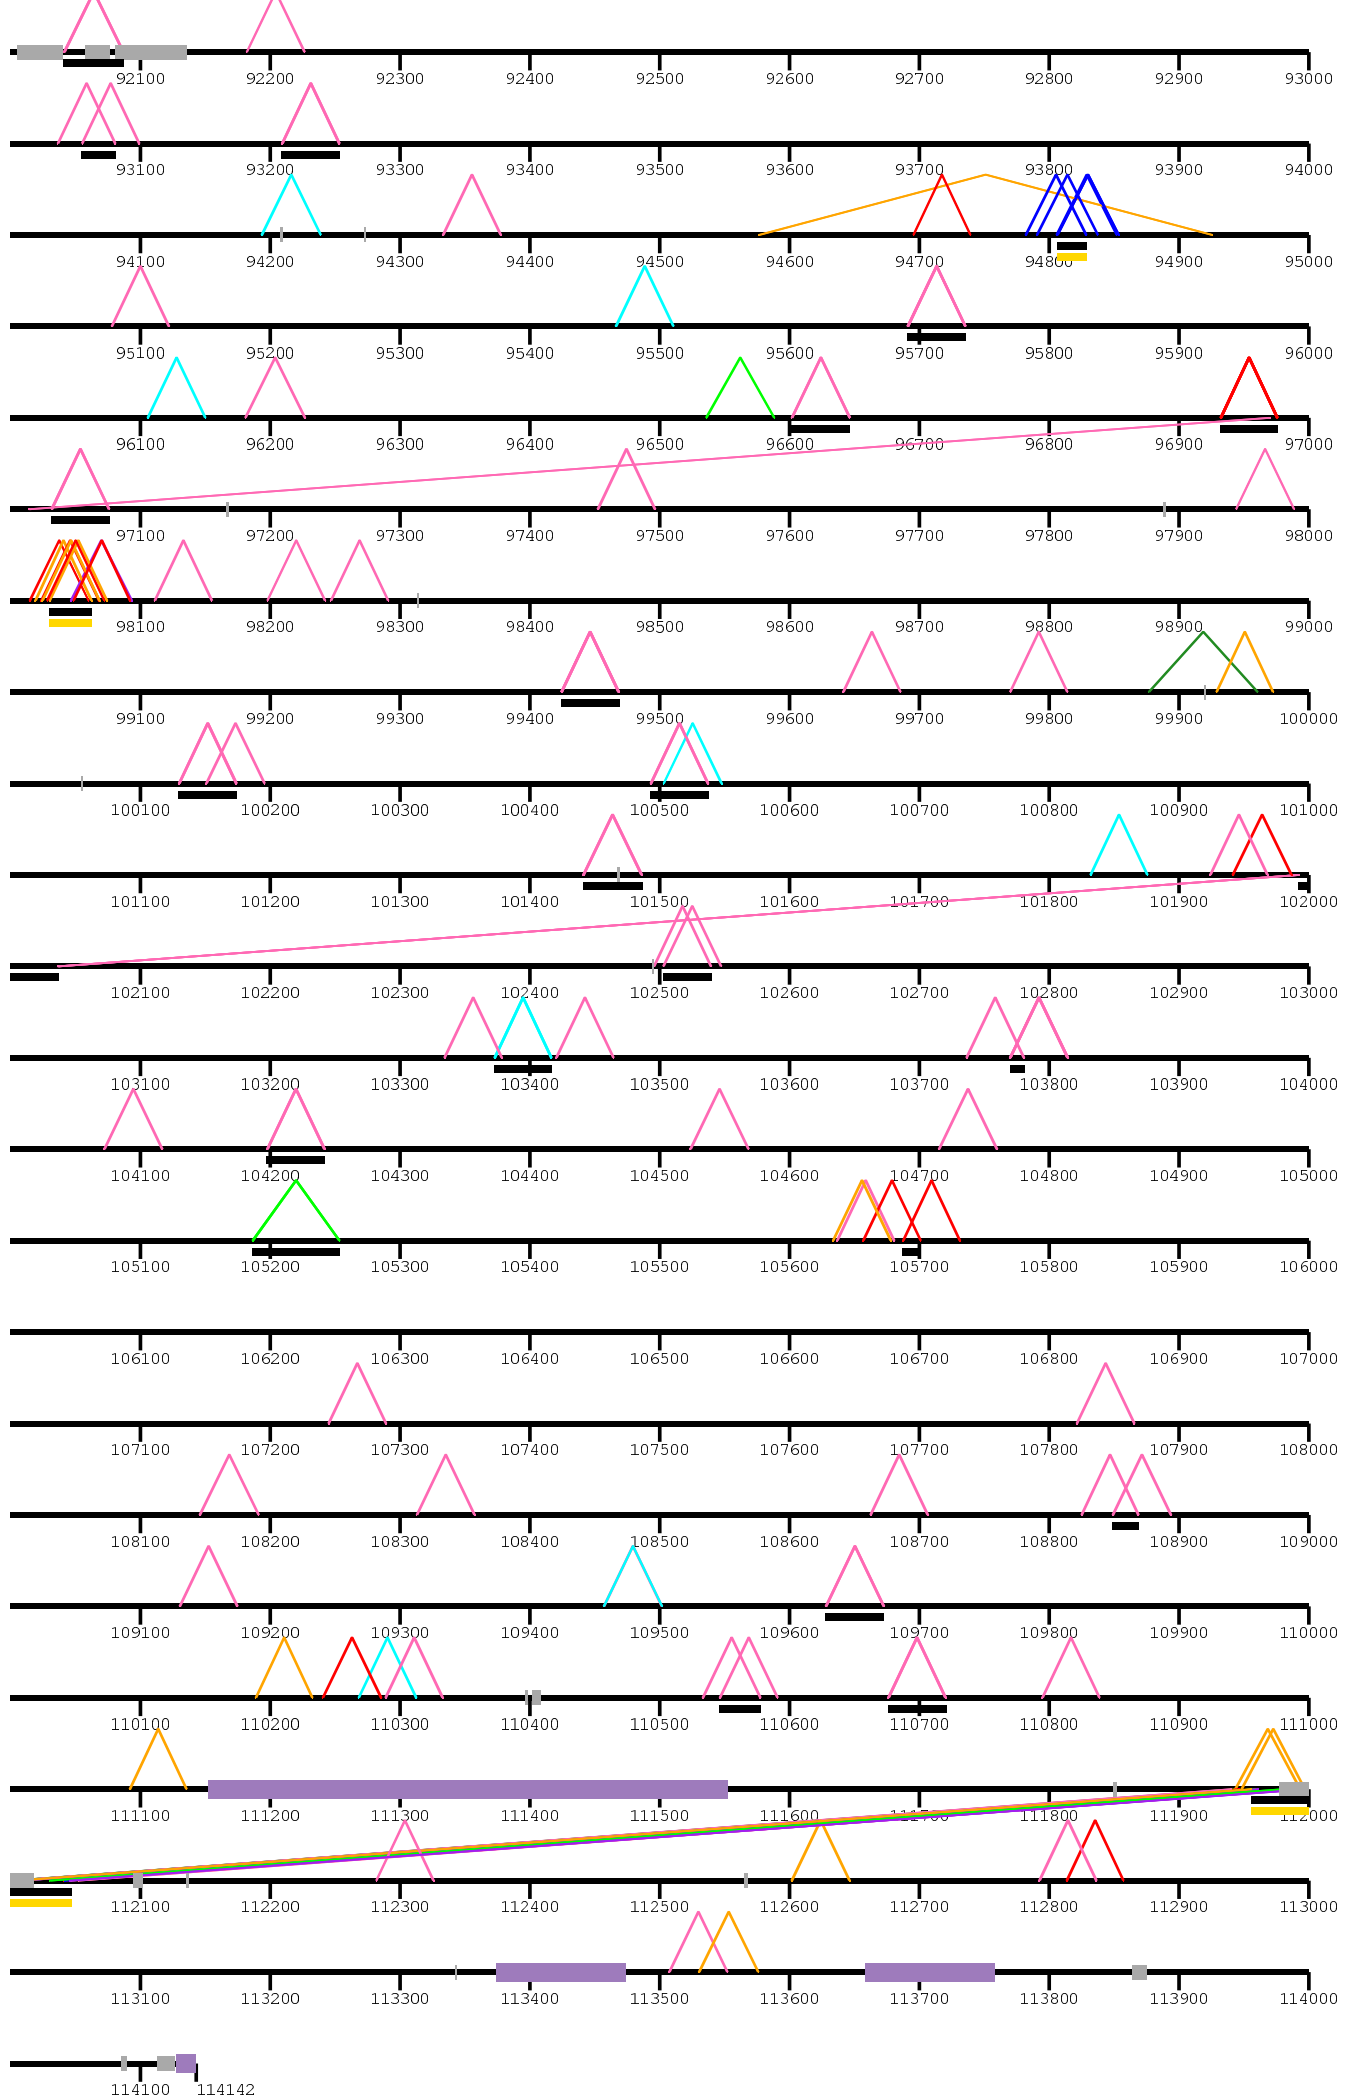

chr14

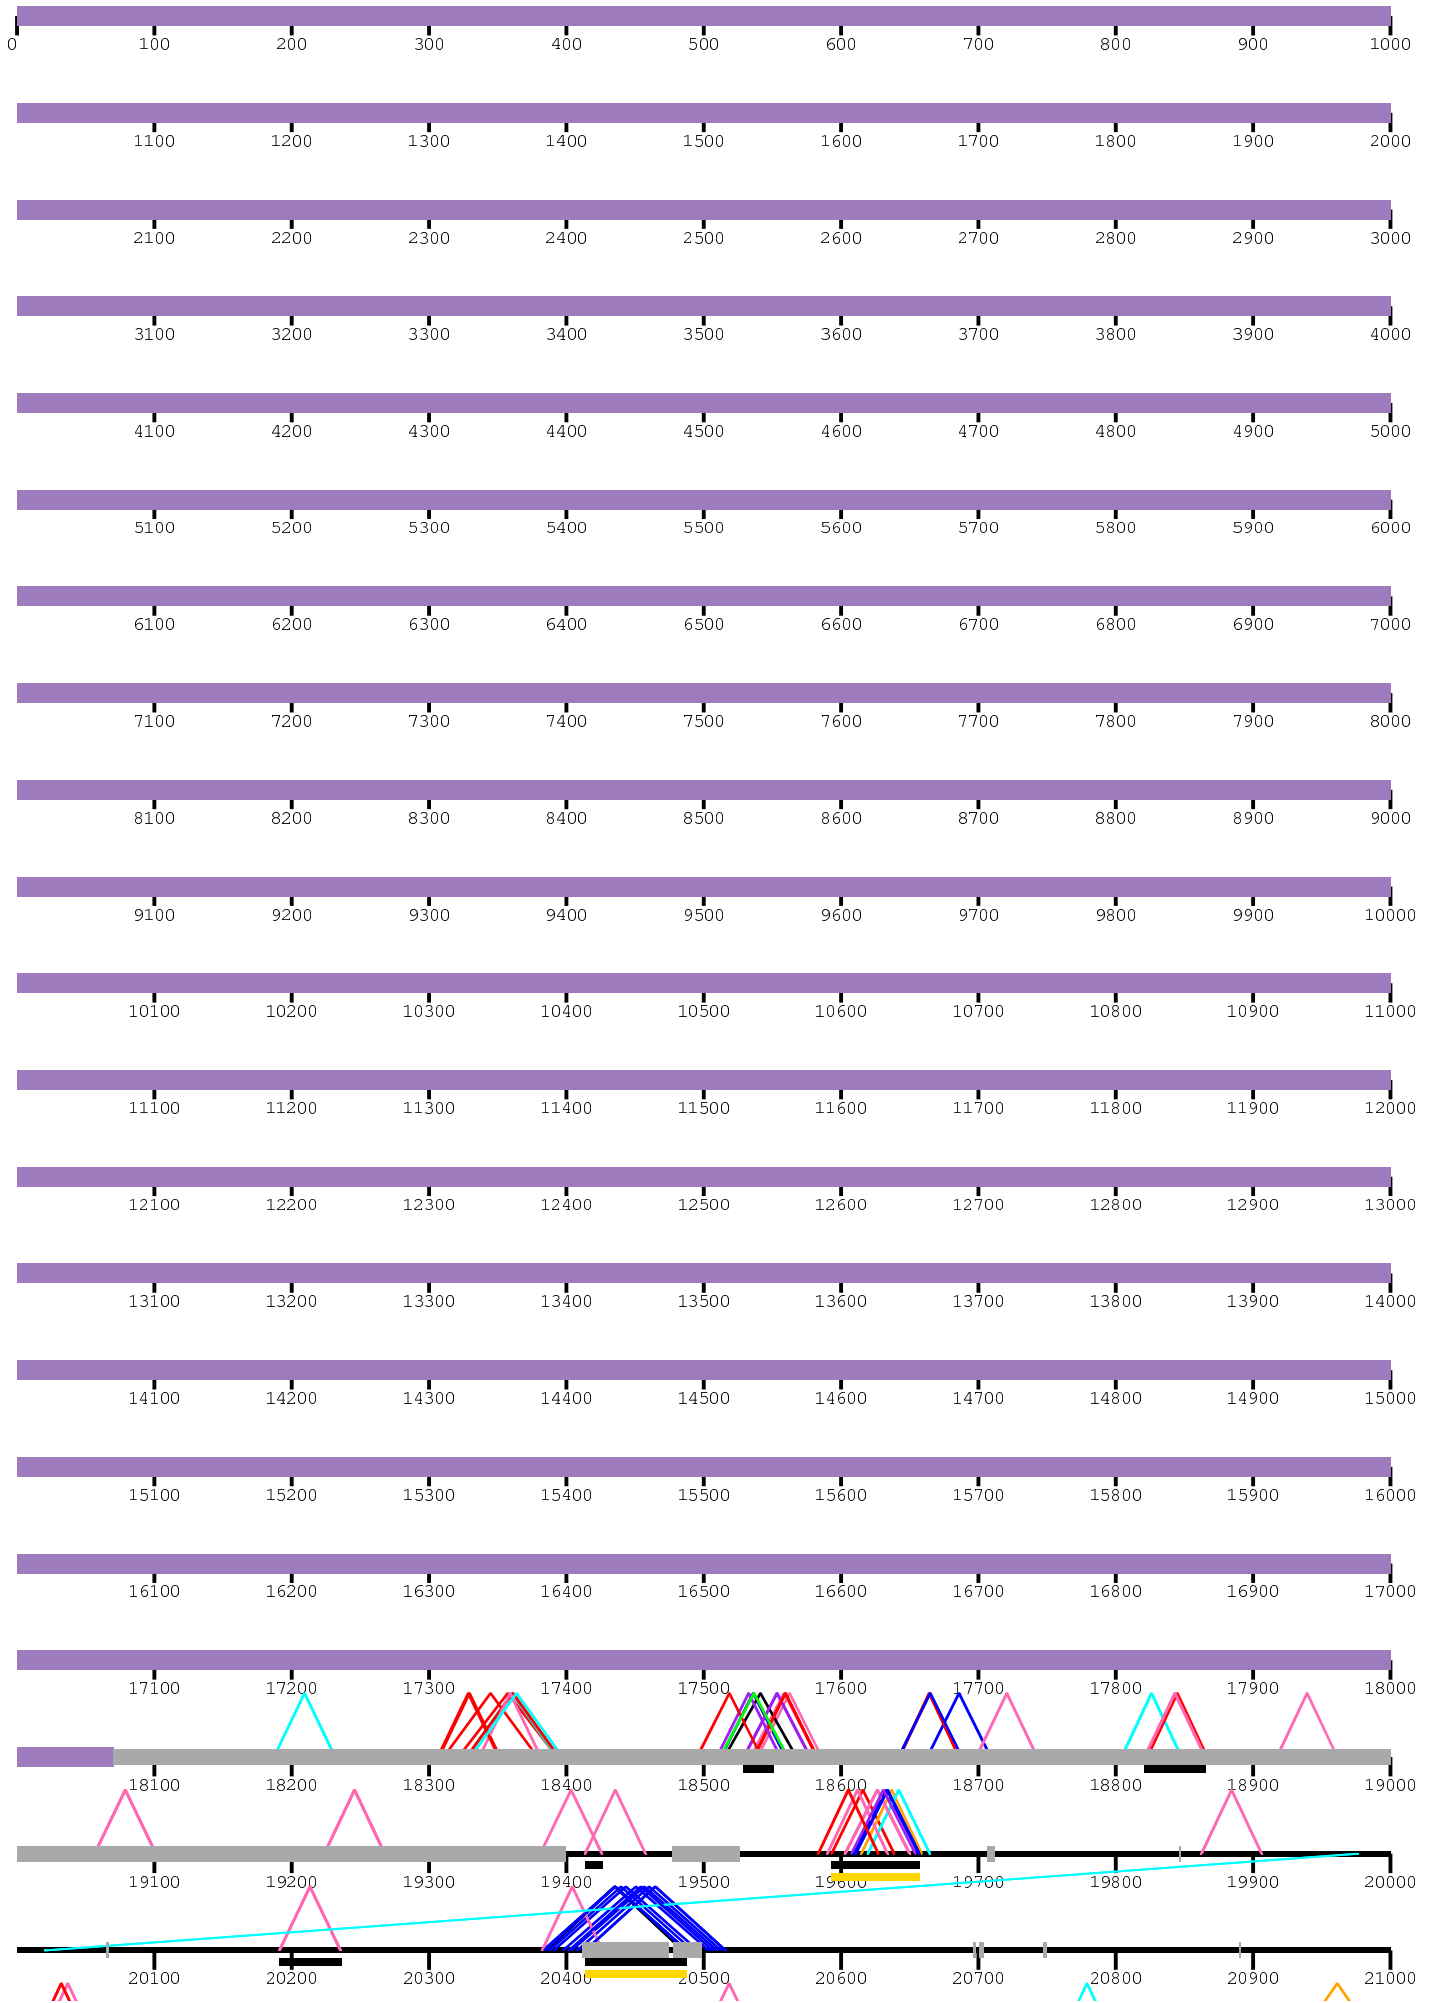

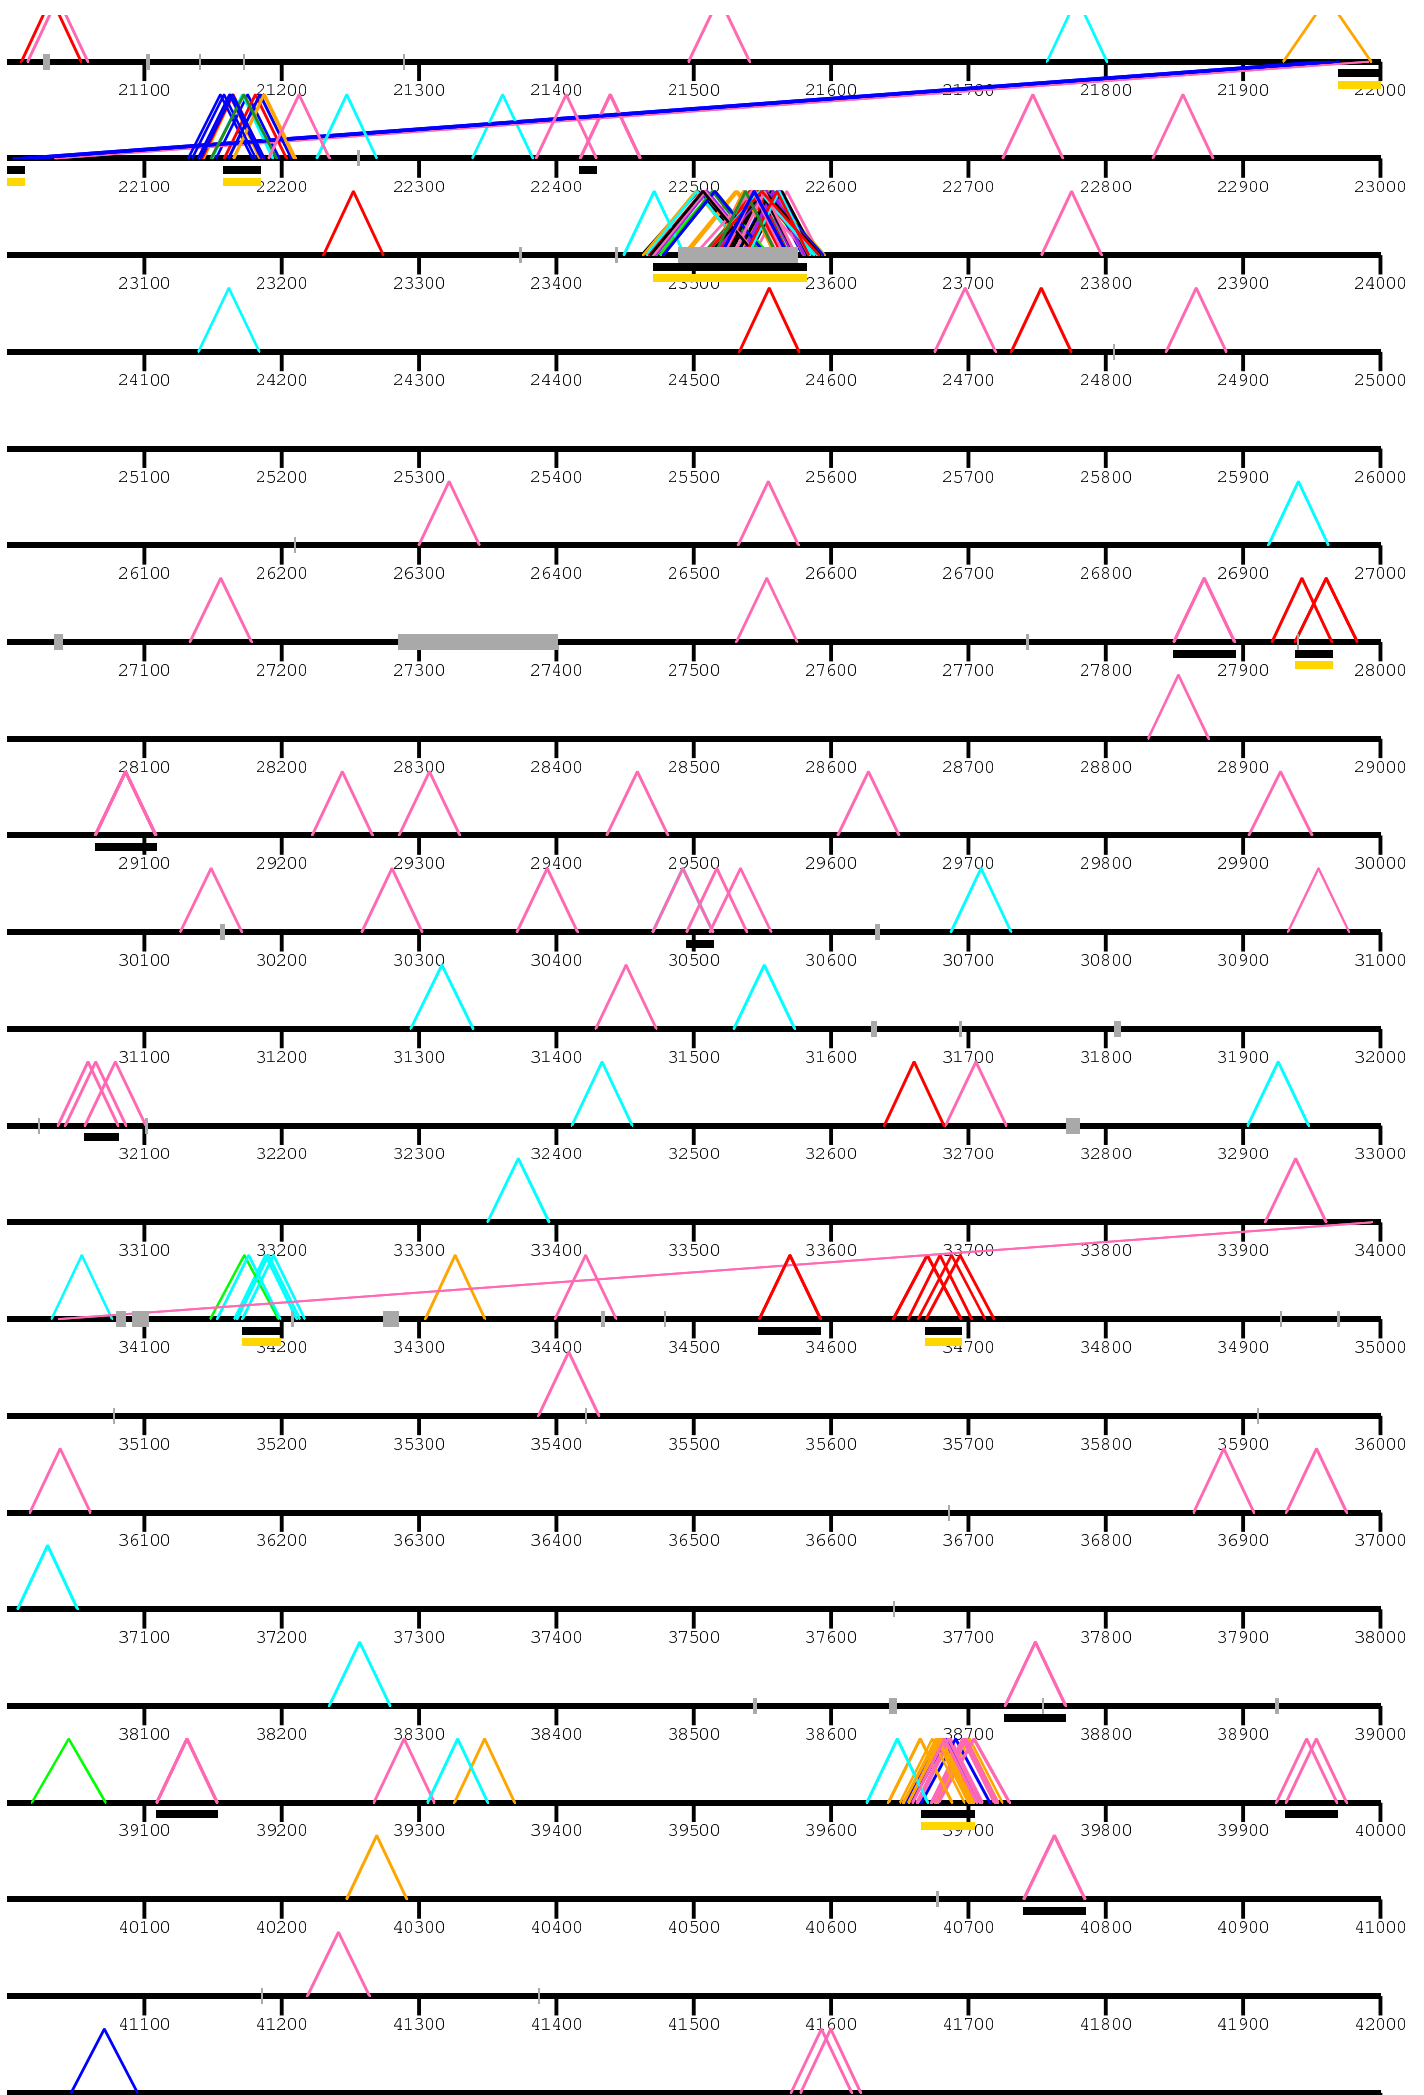



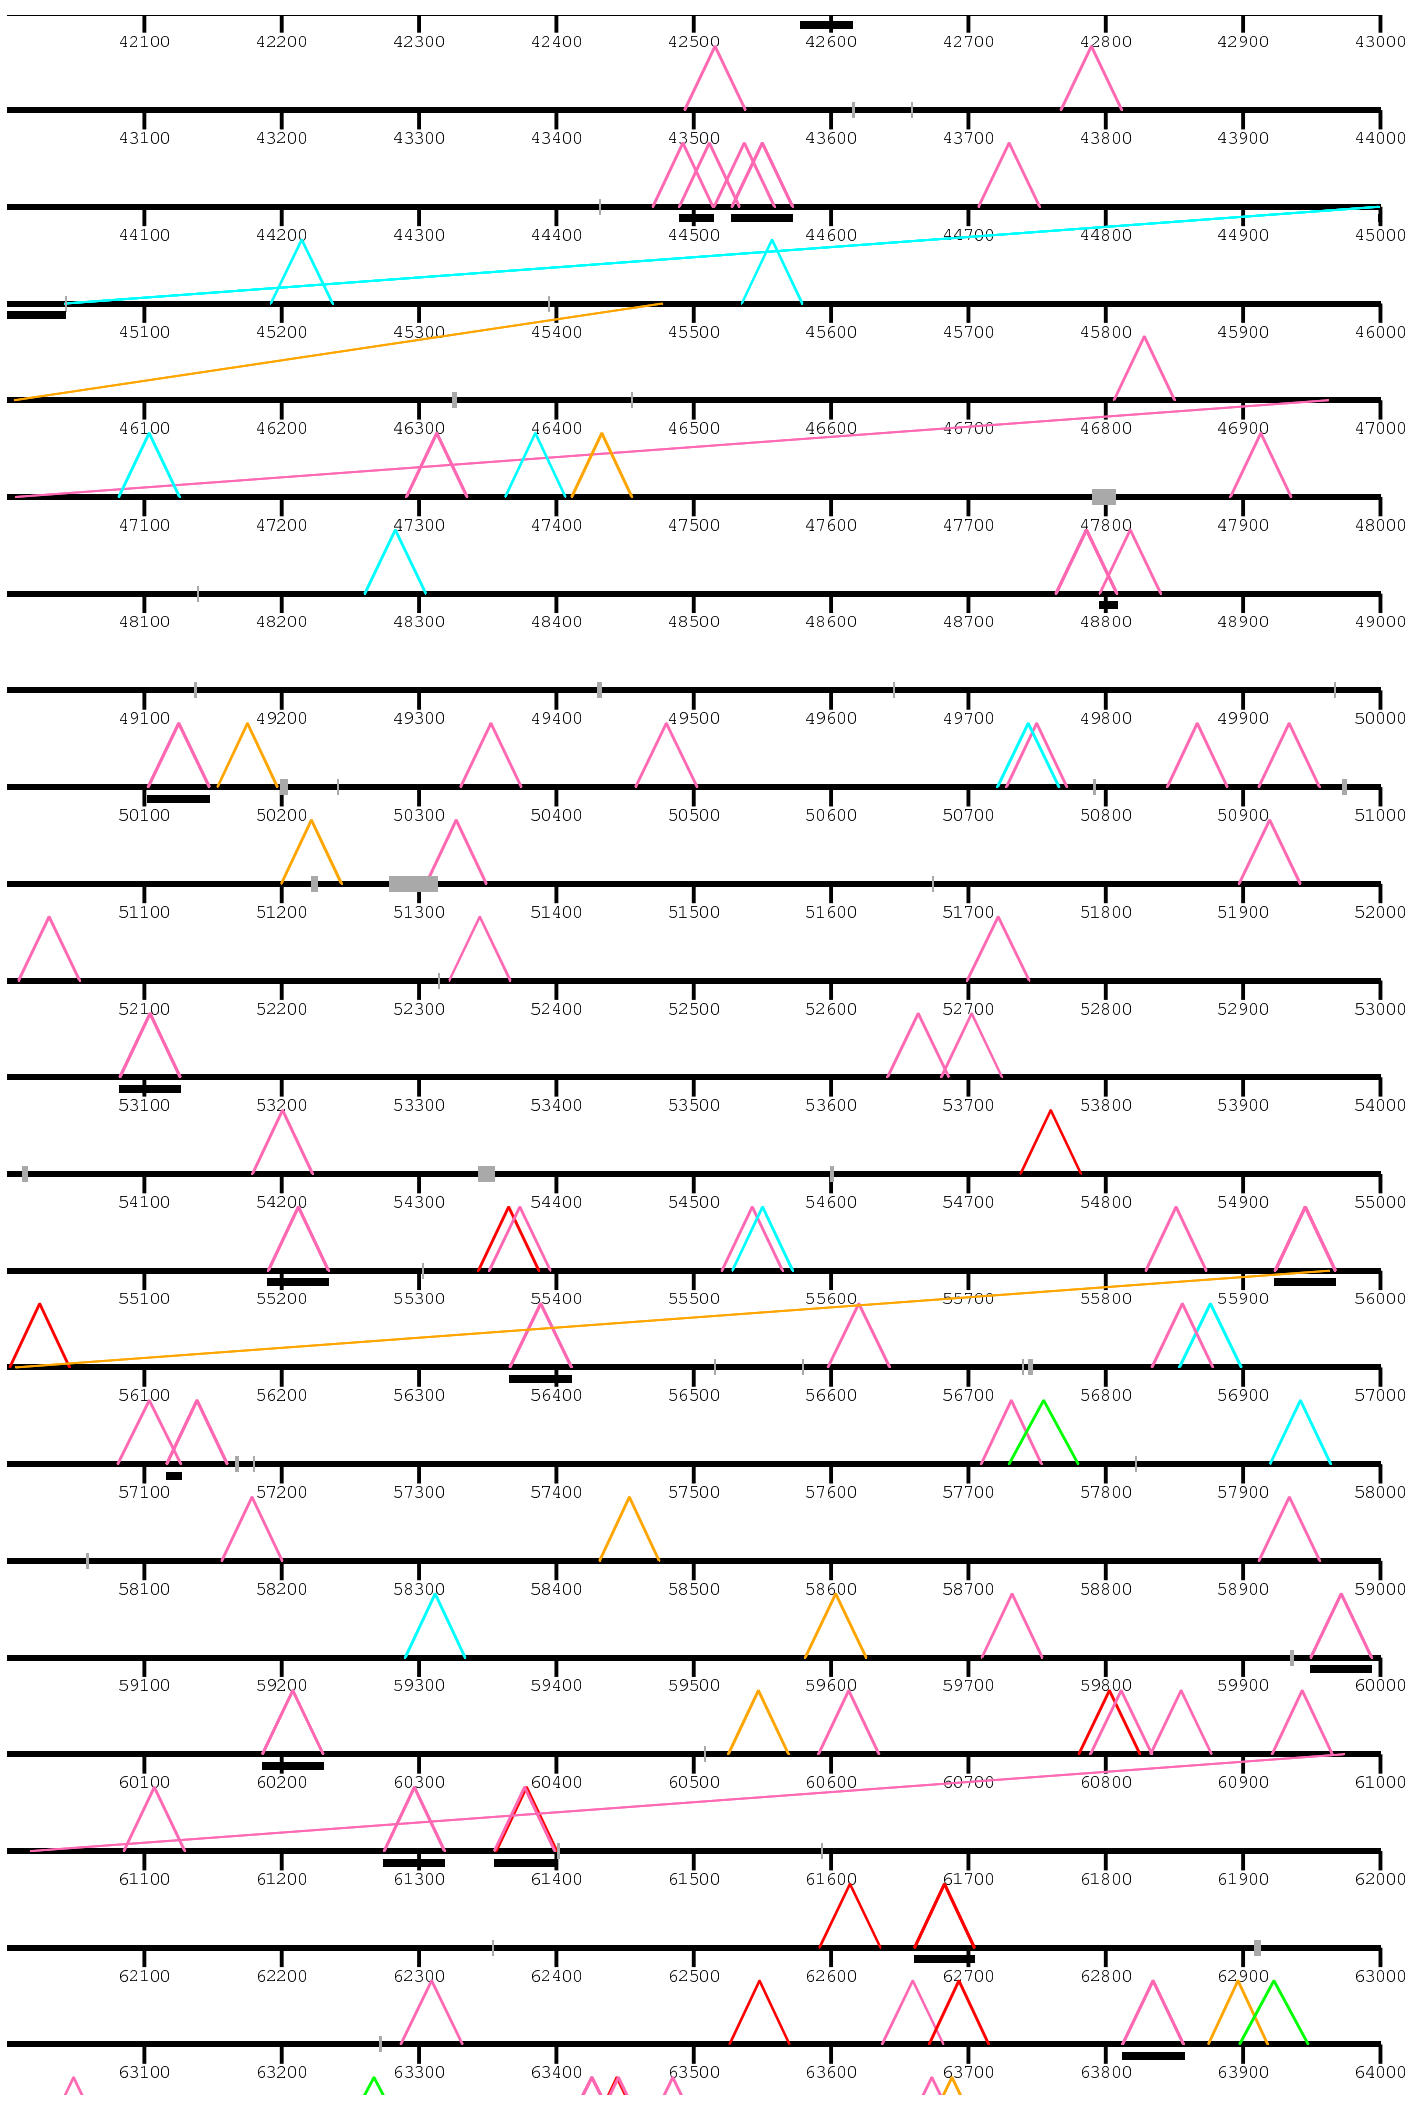

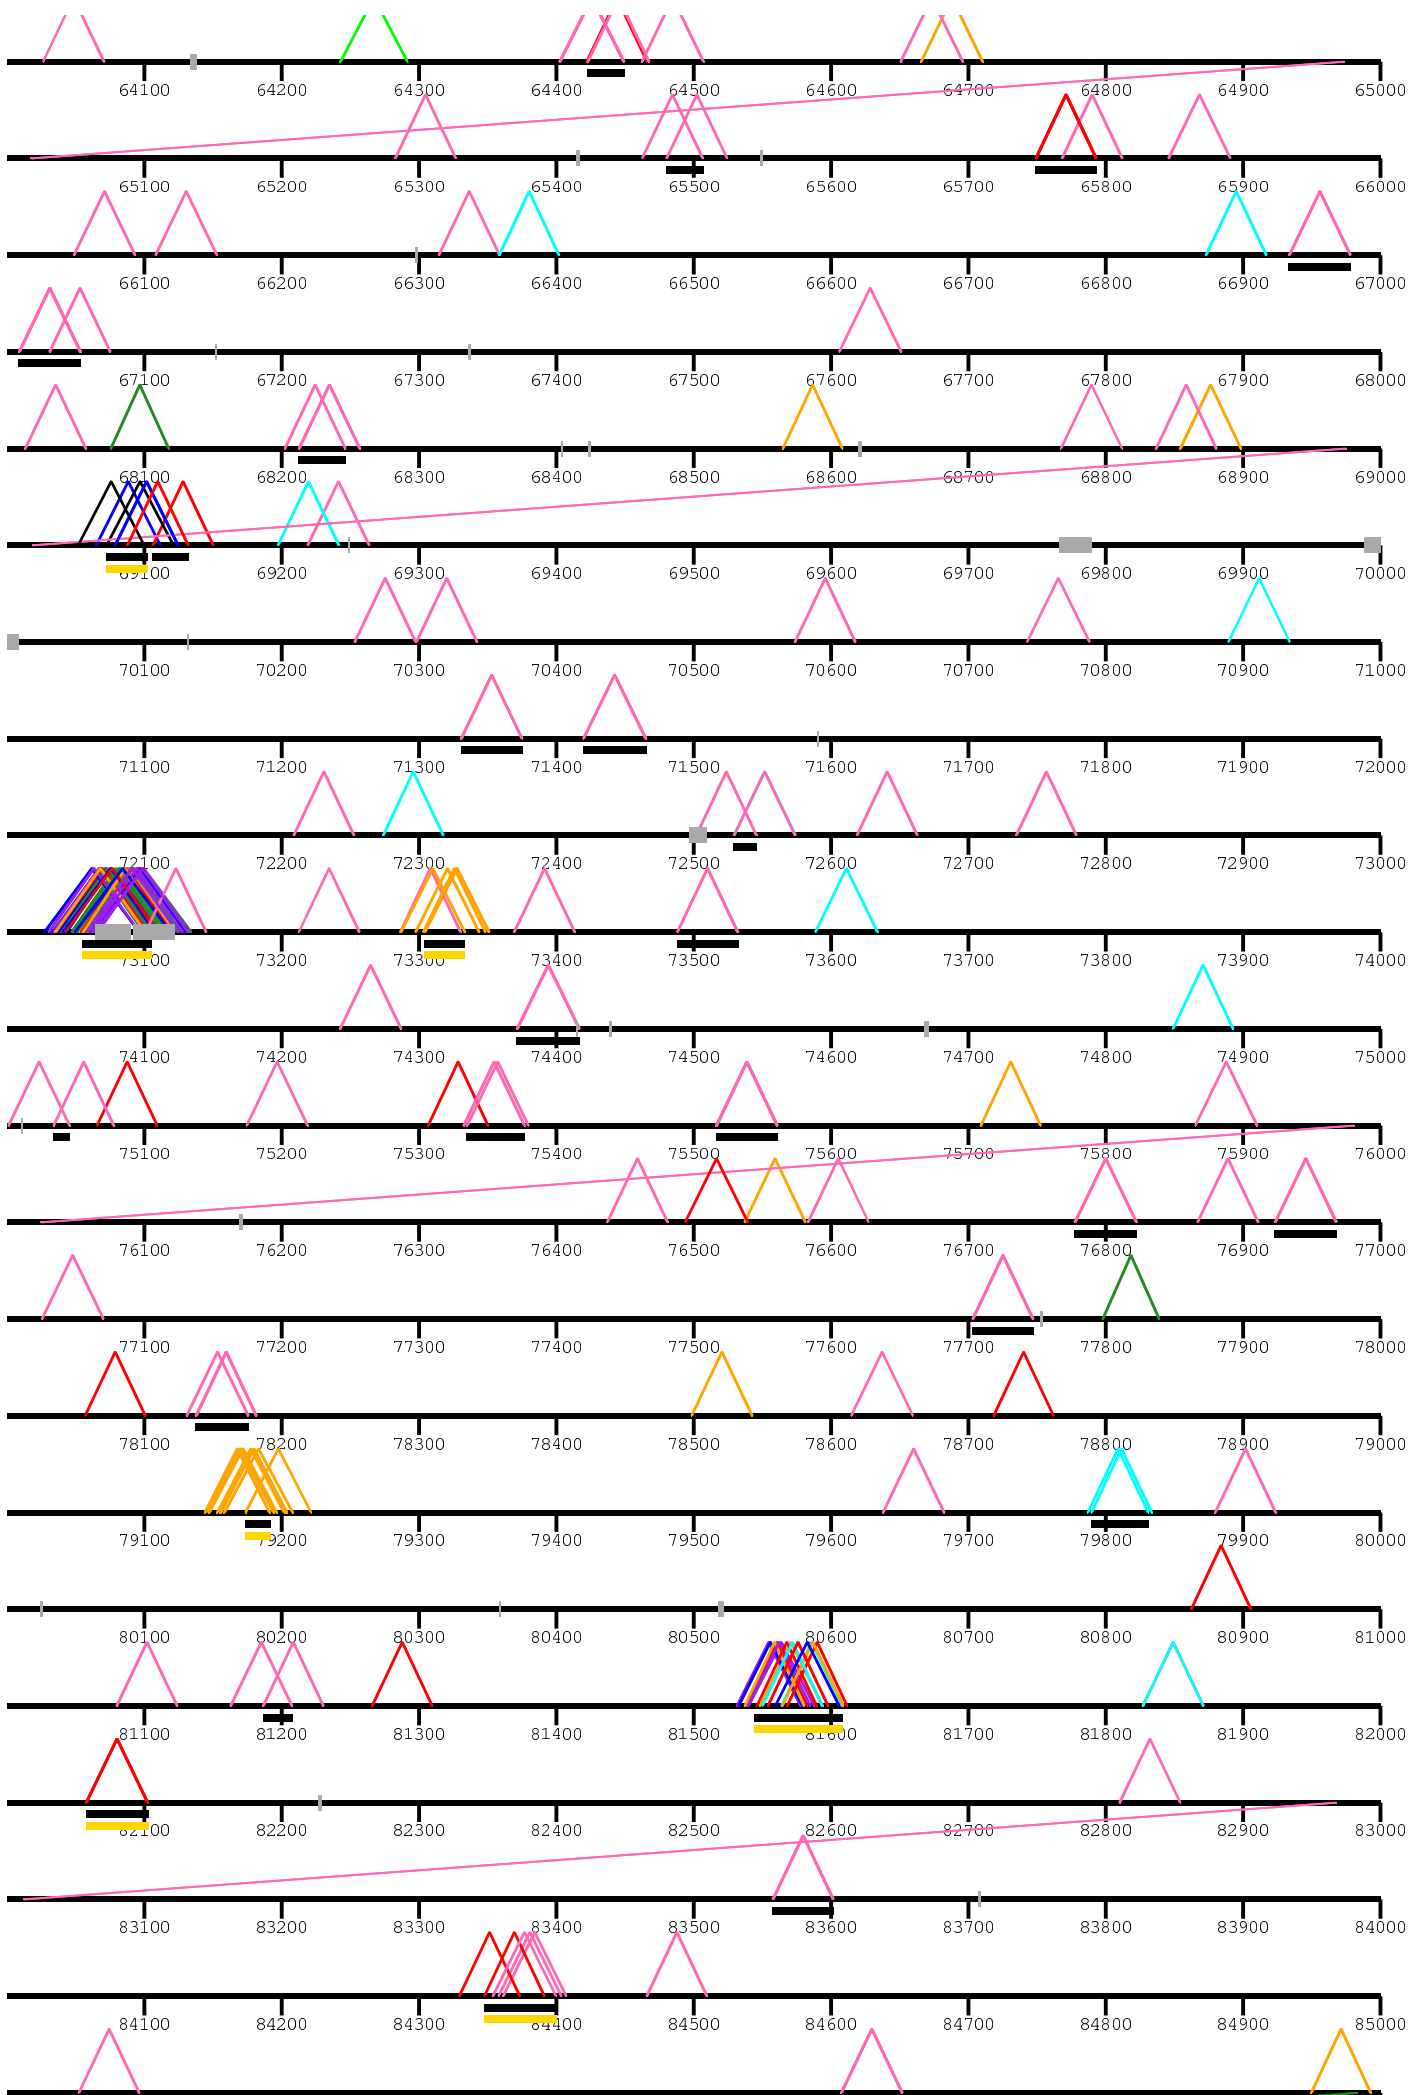

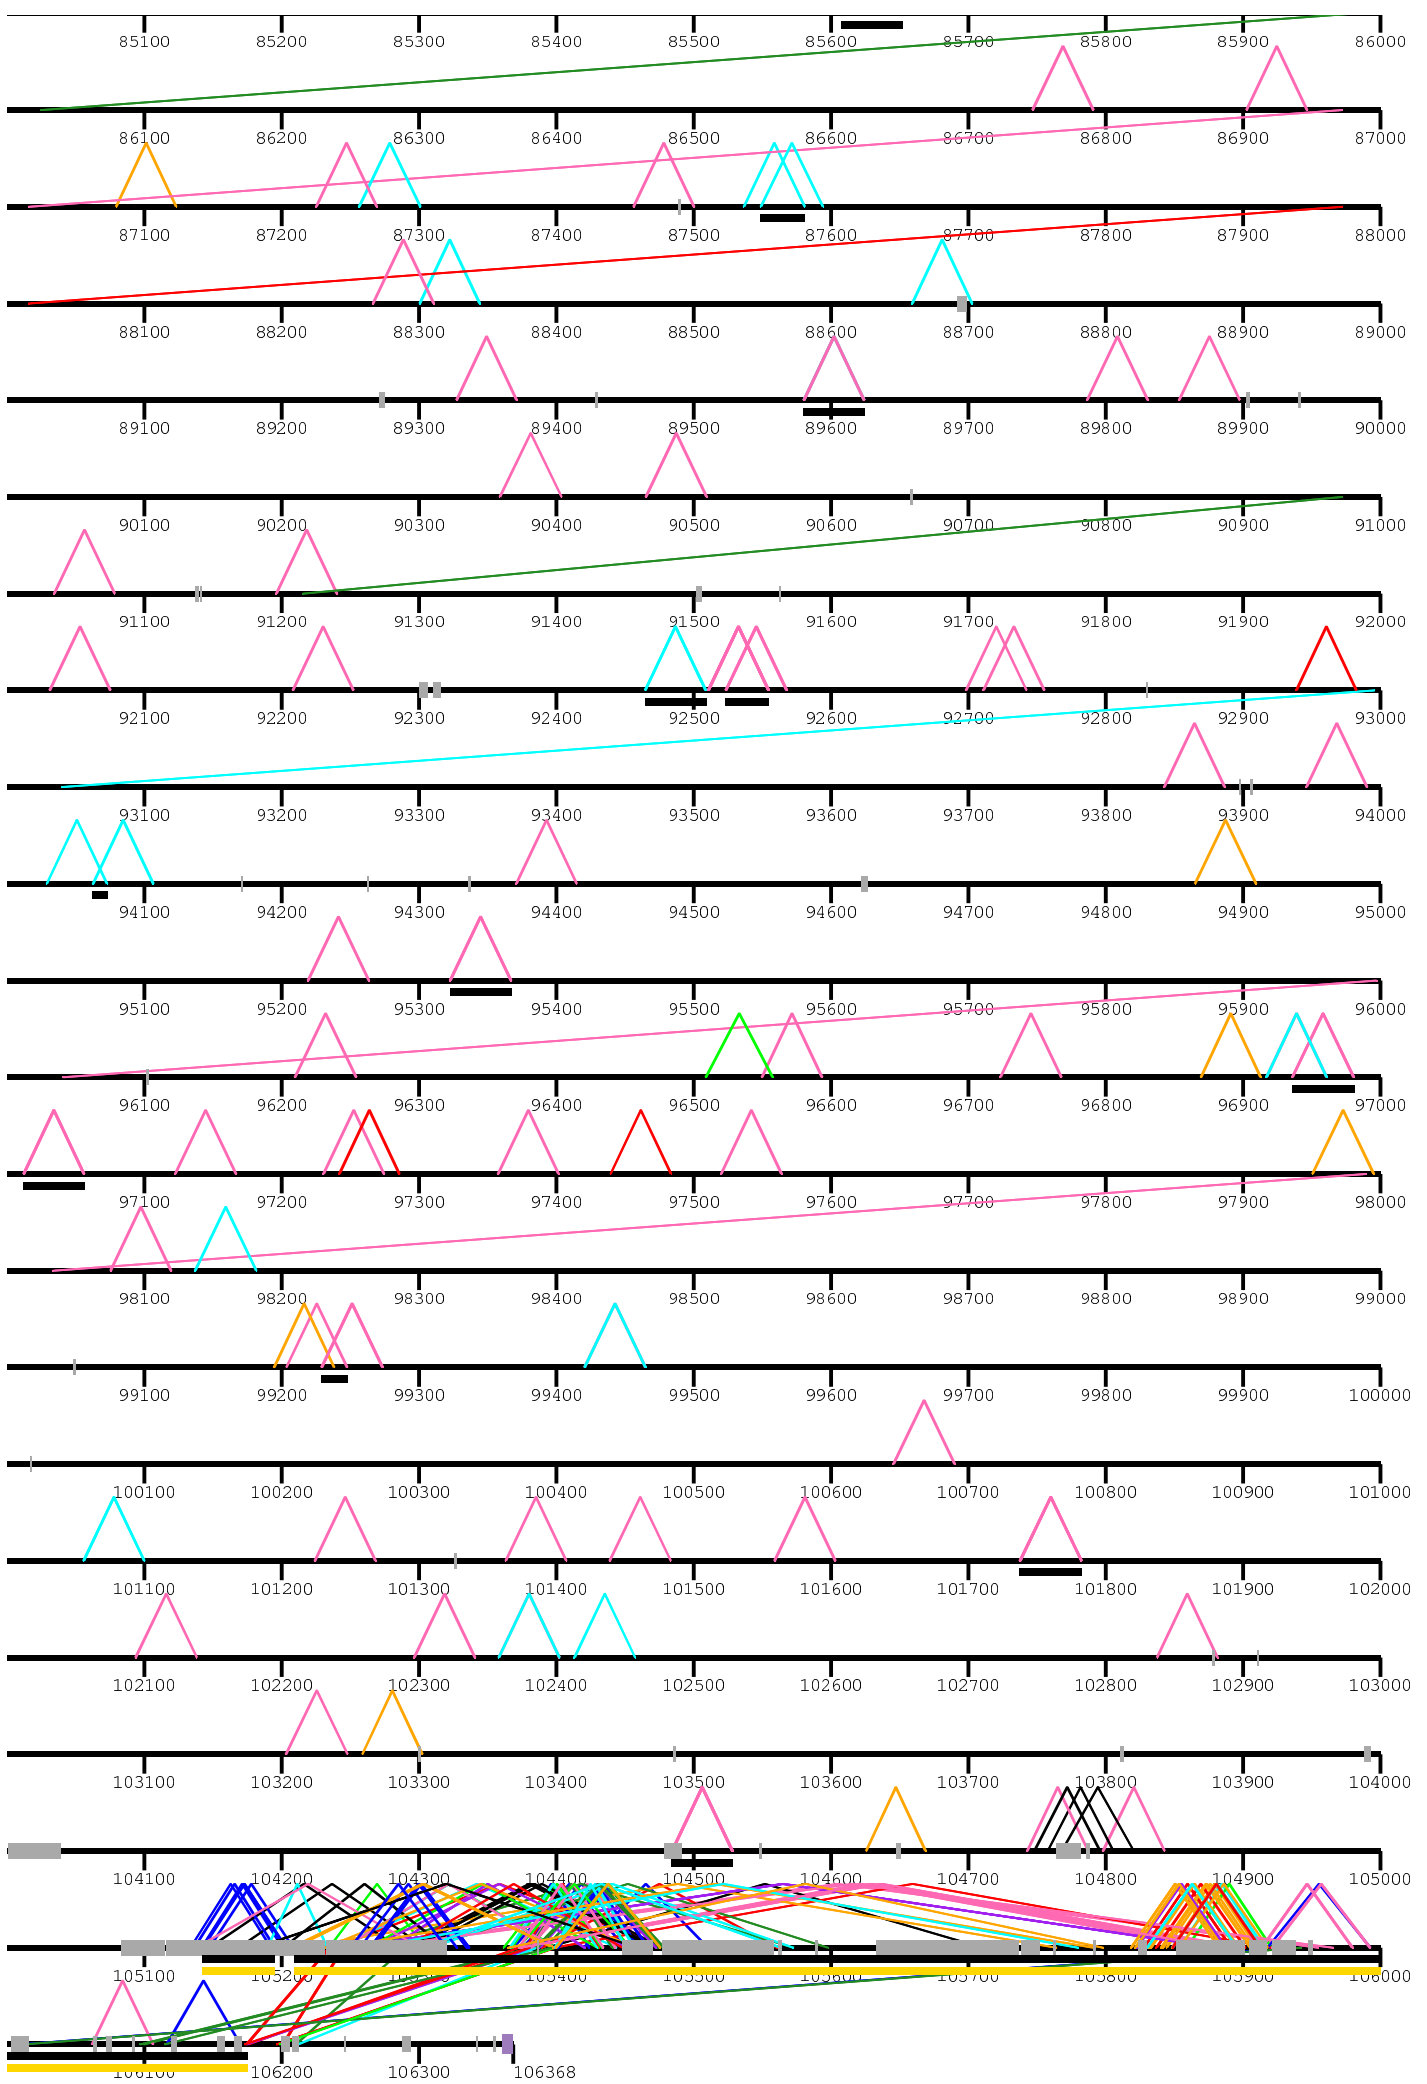

chr15

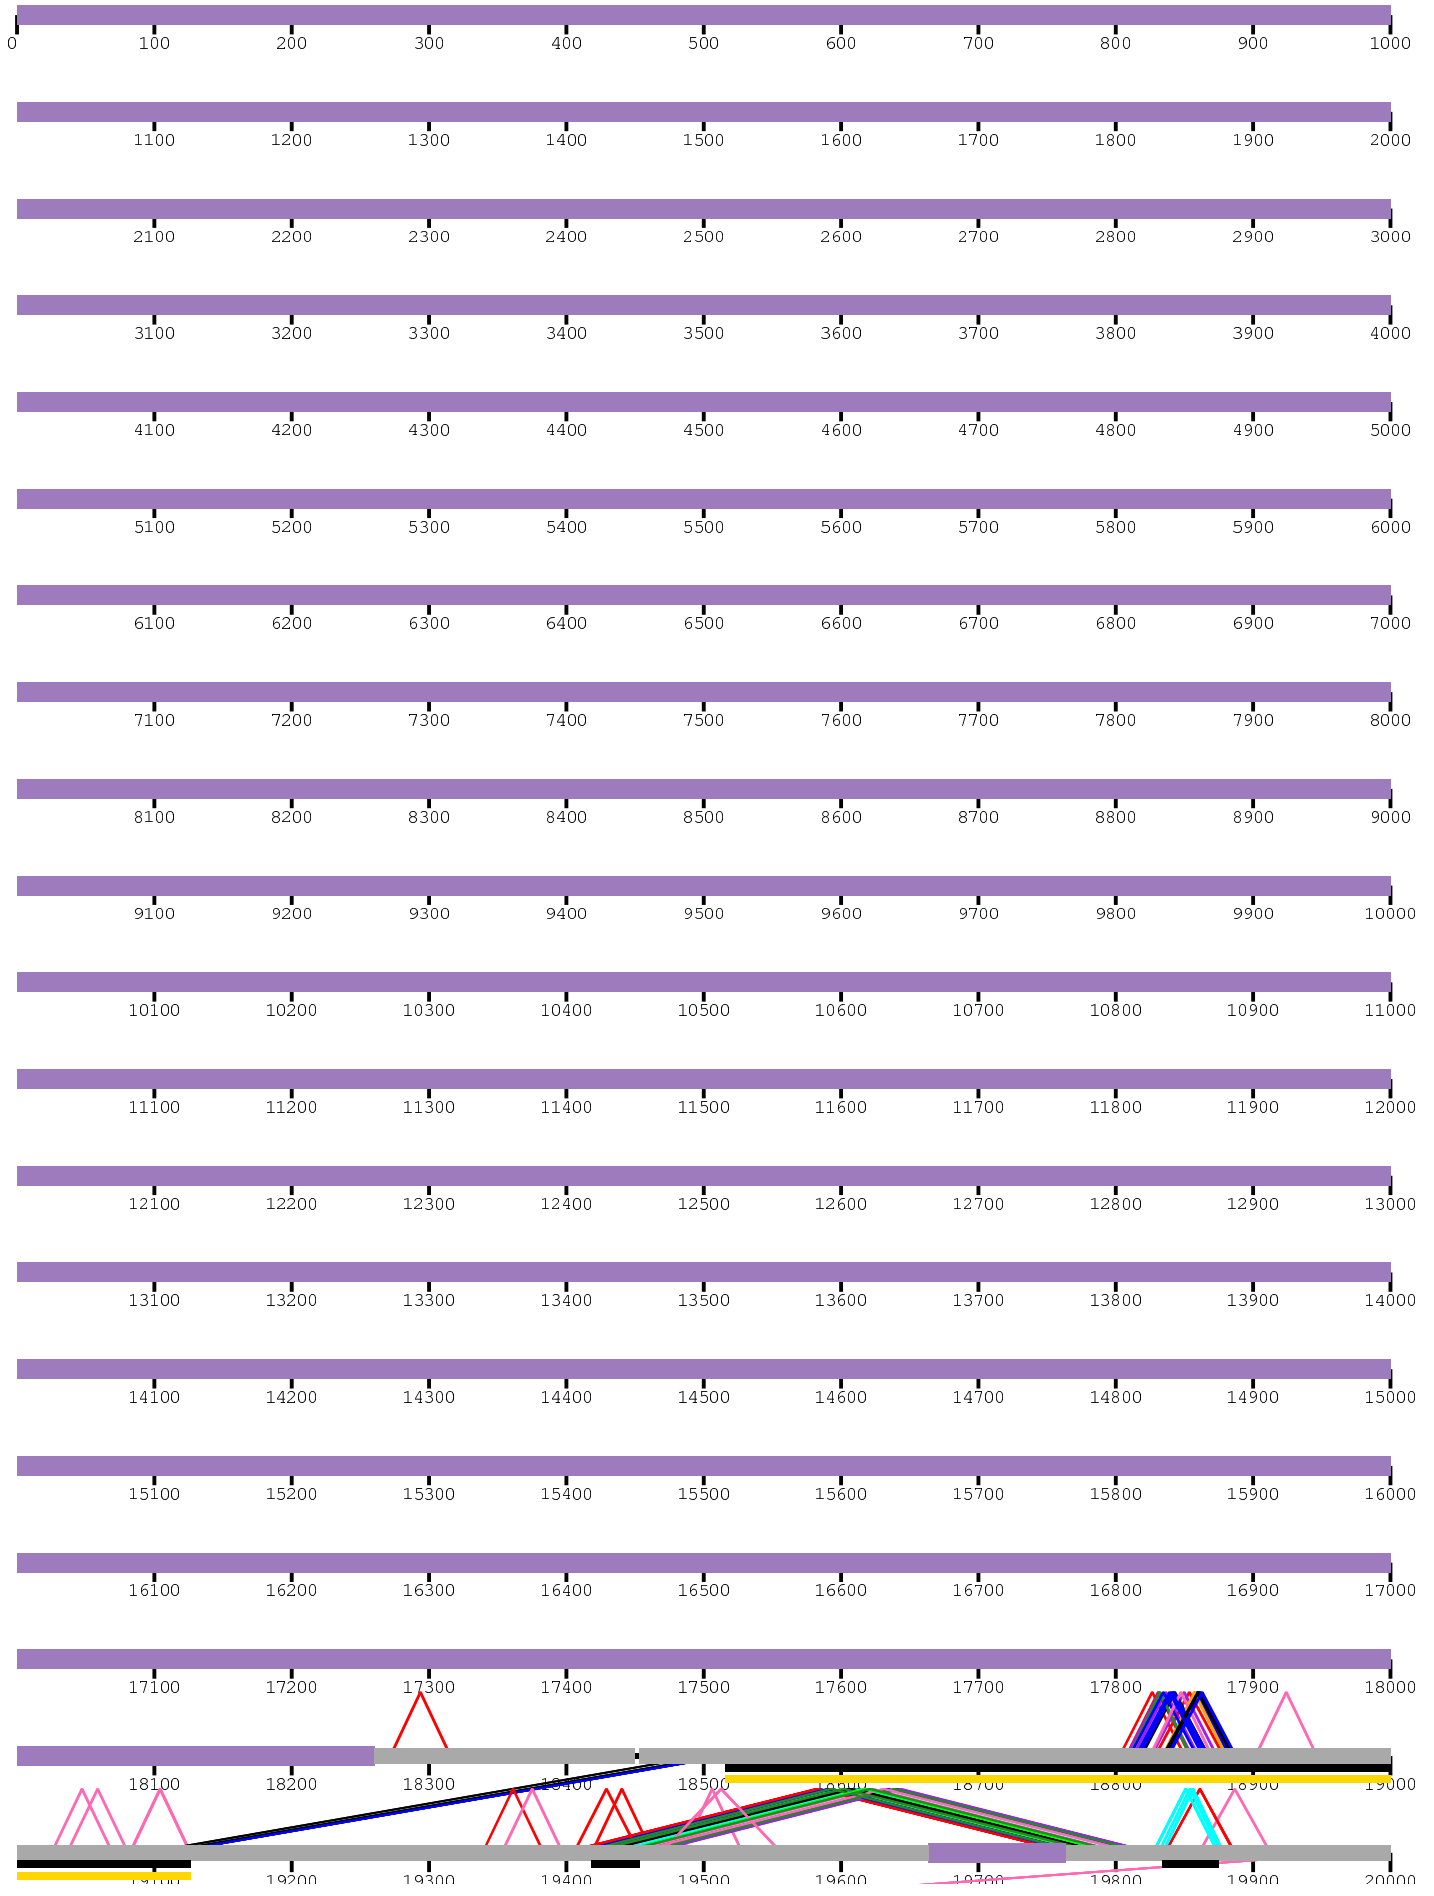

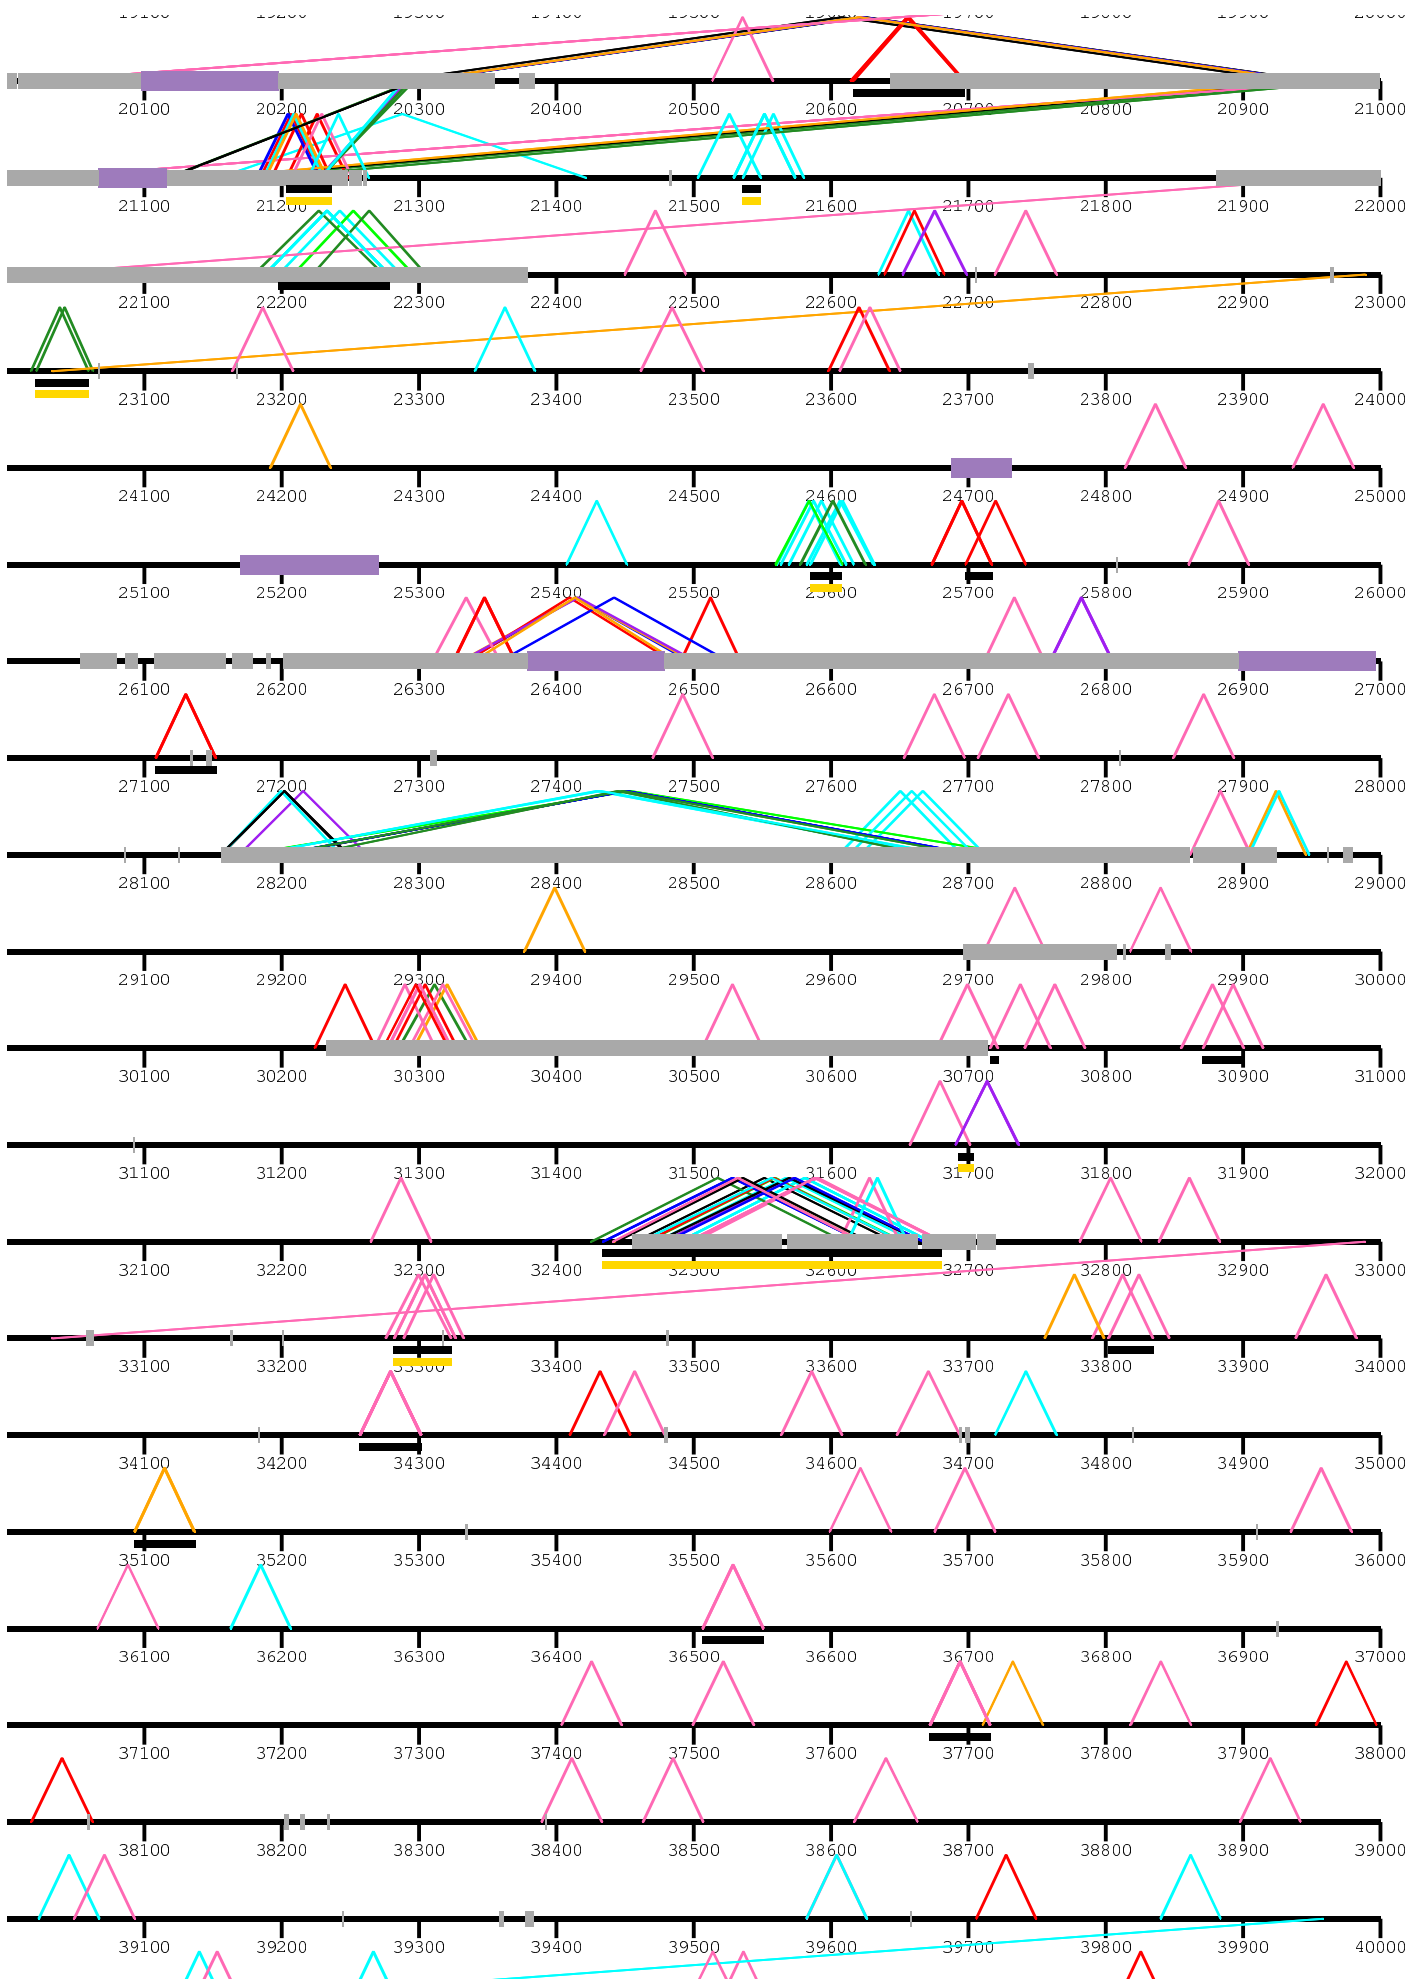

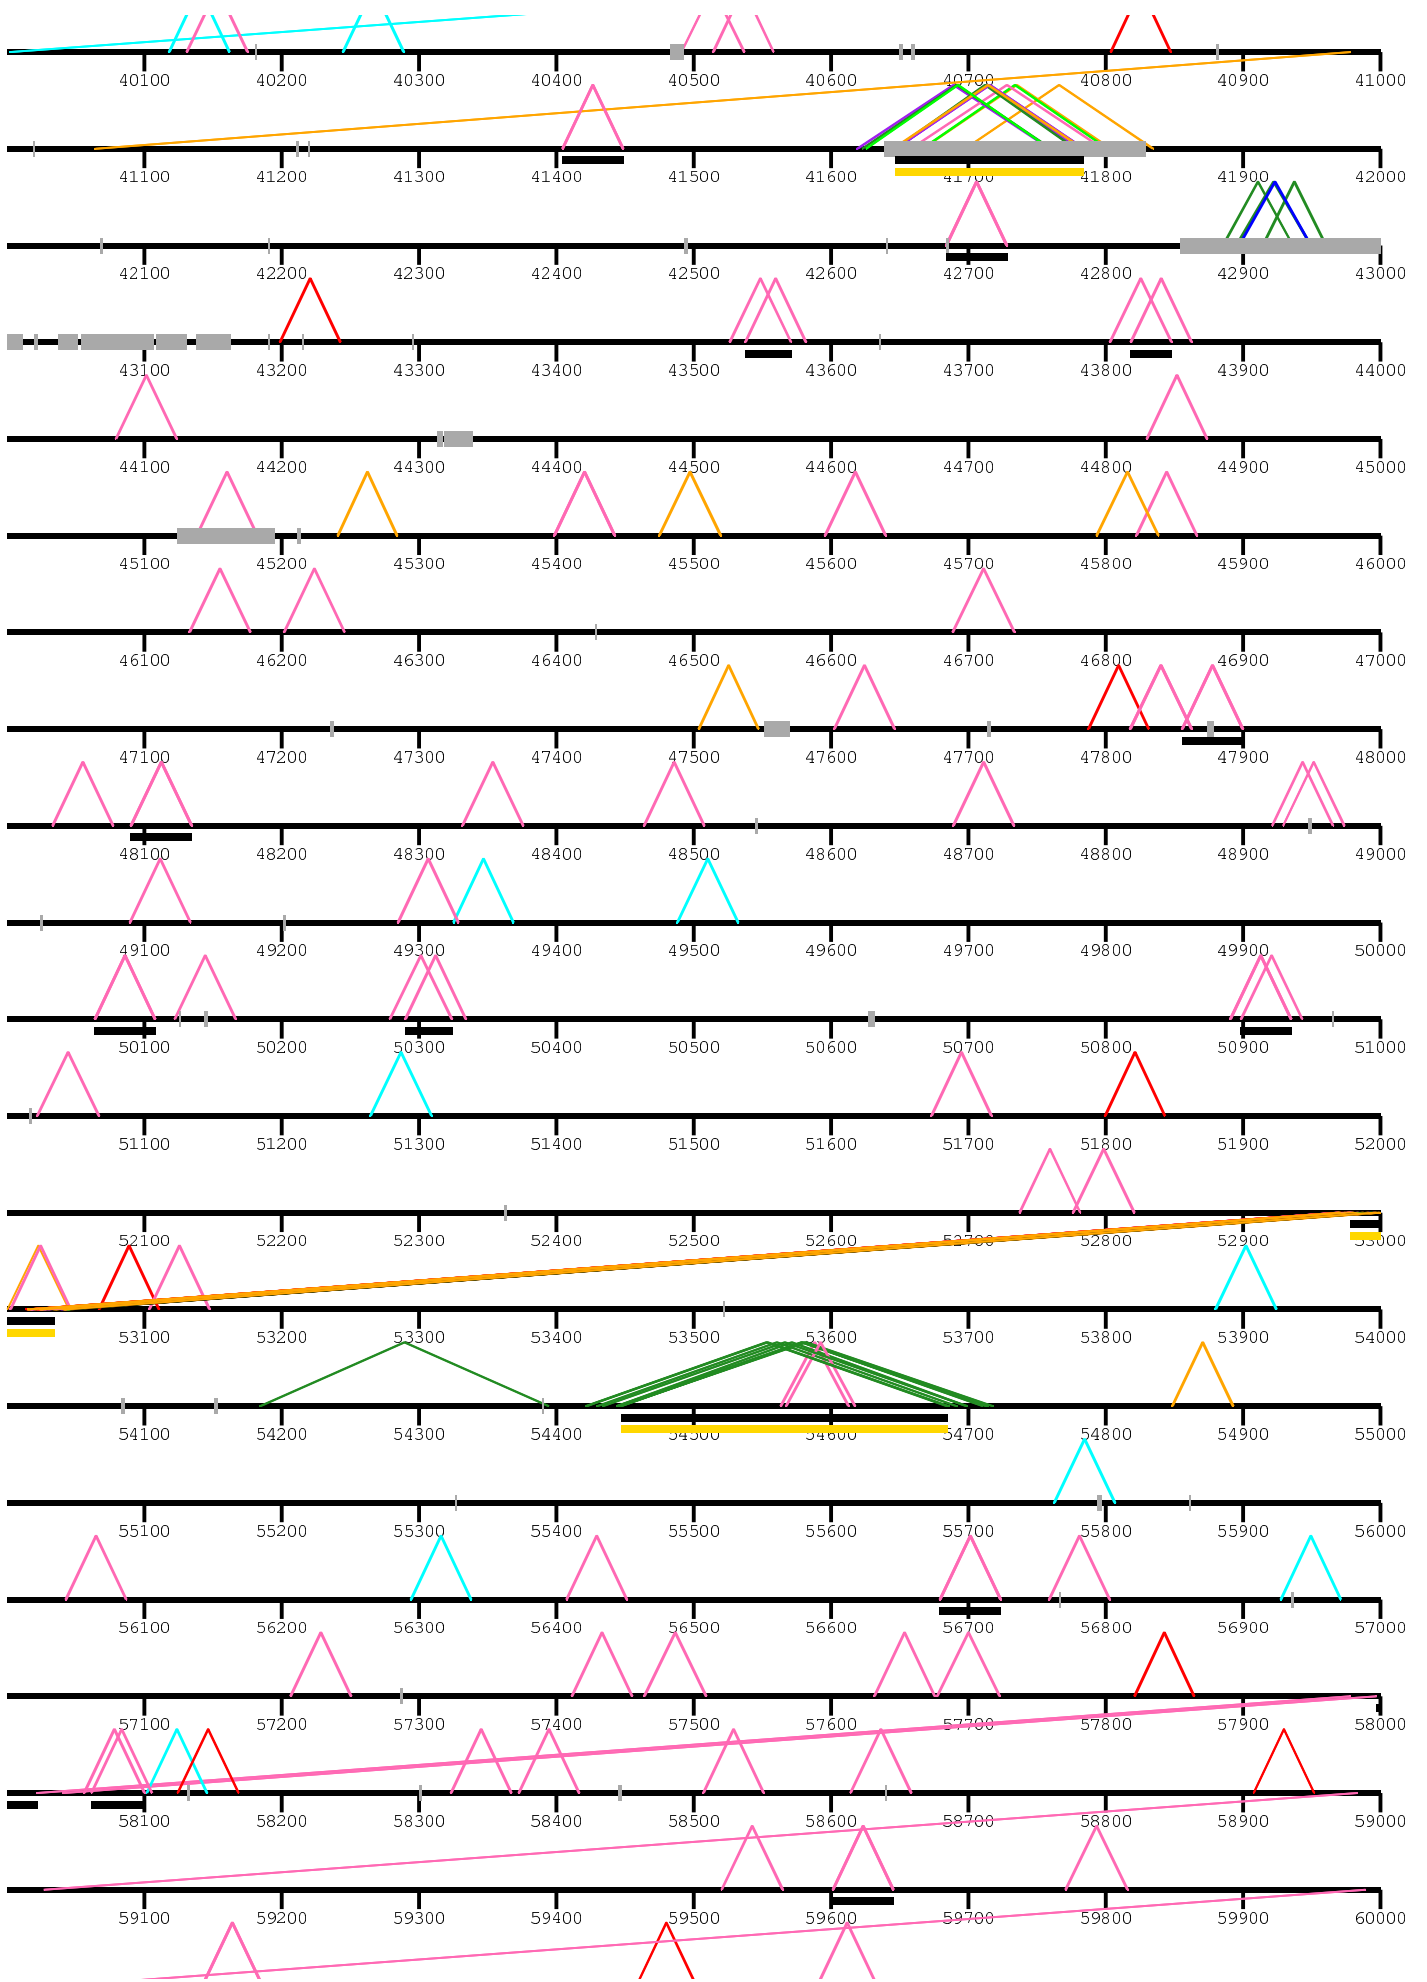

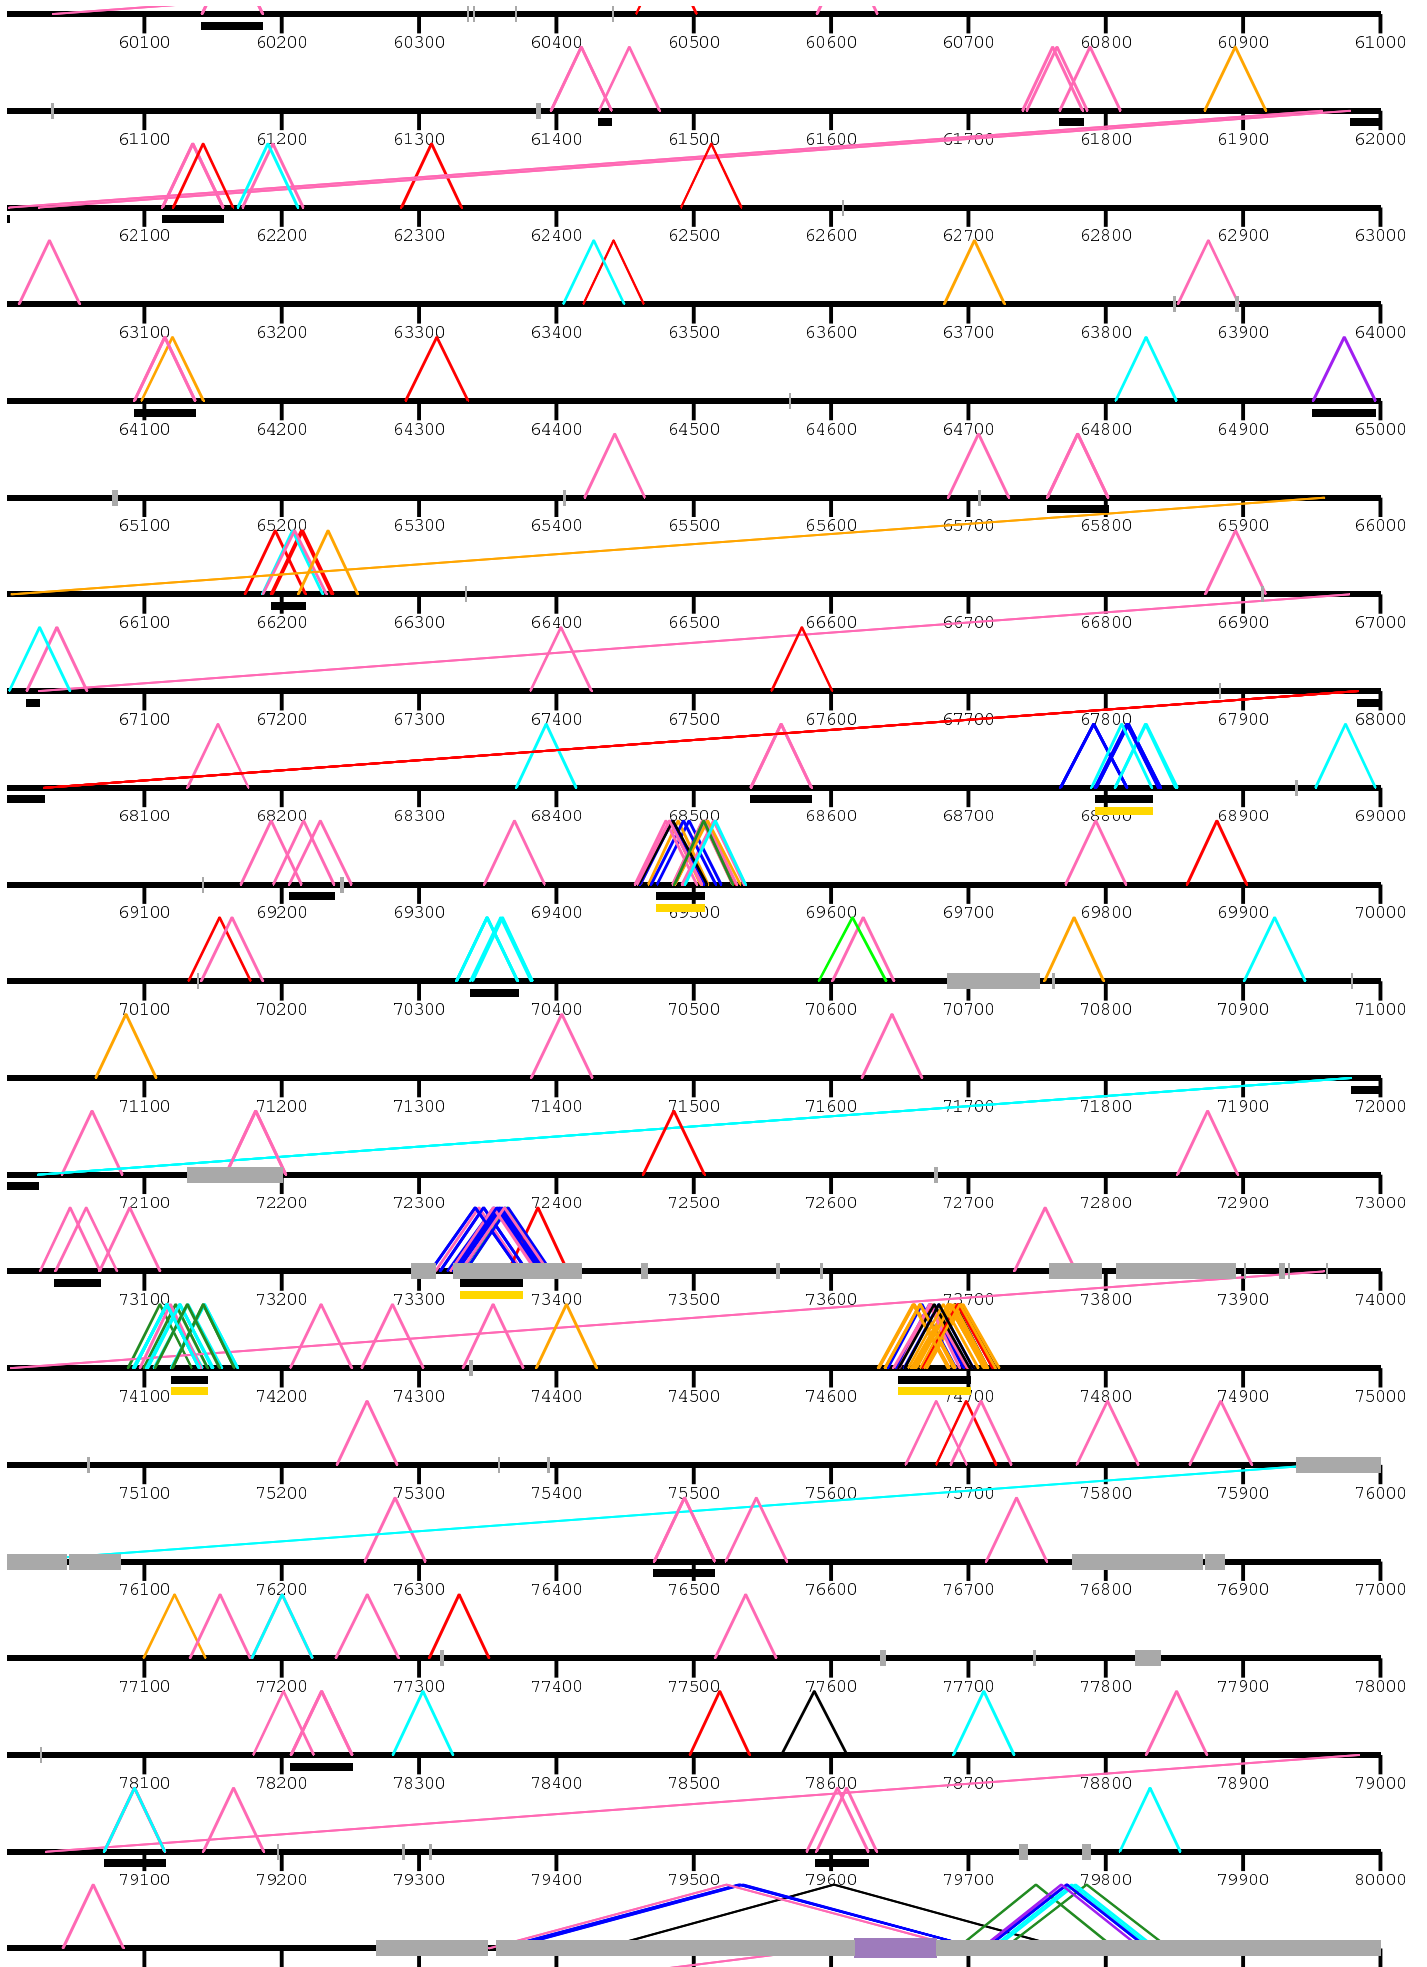

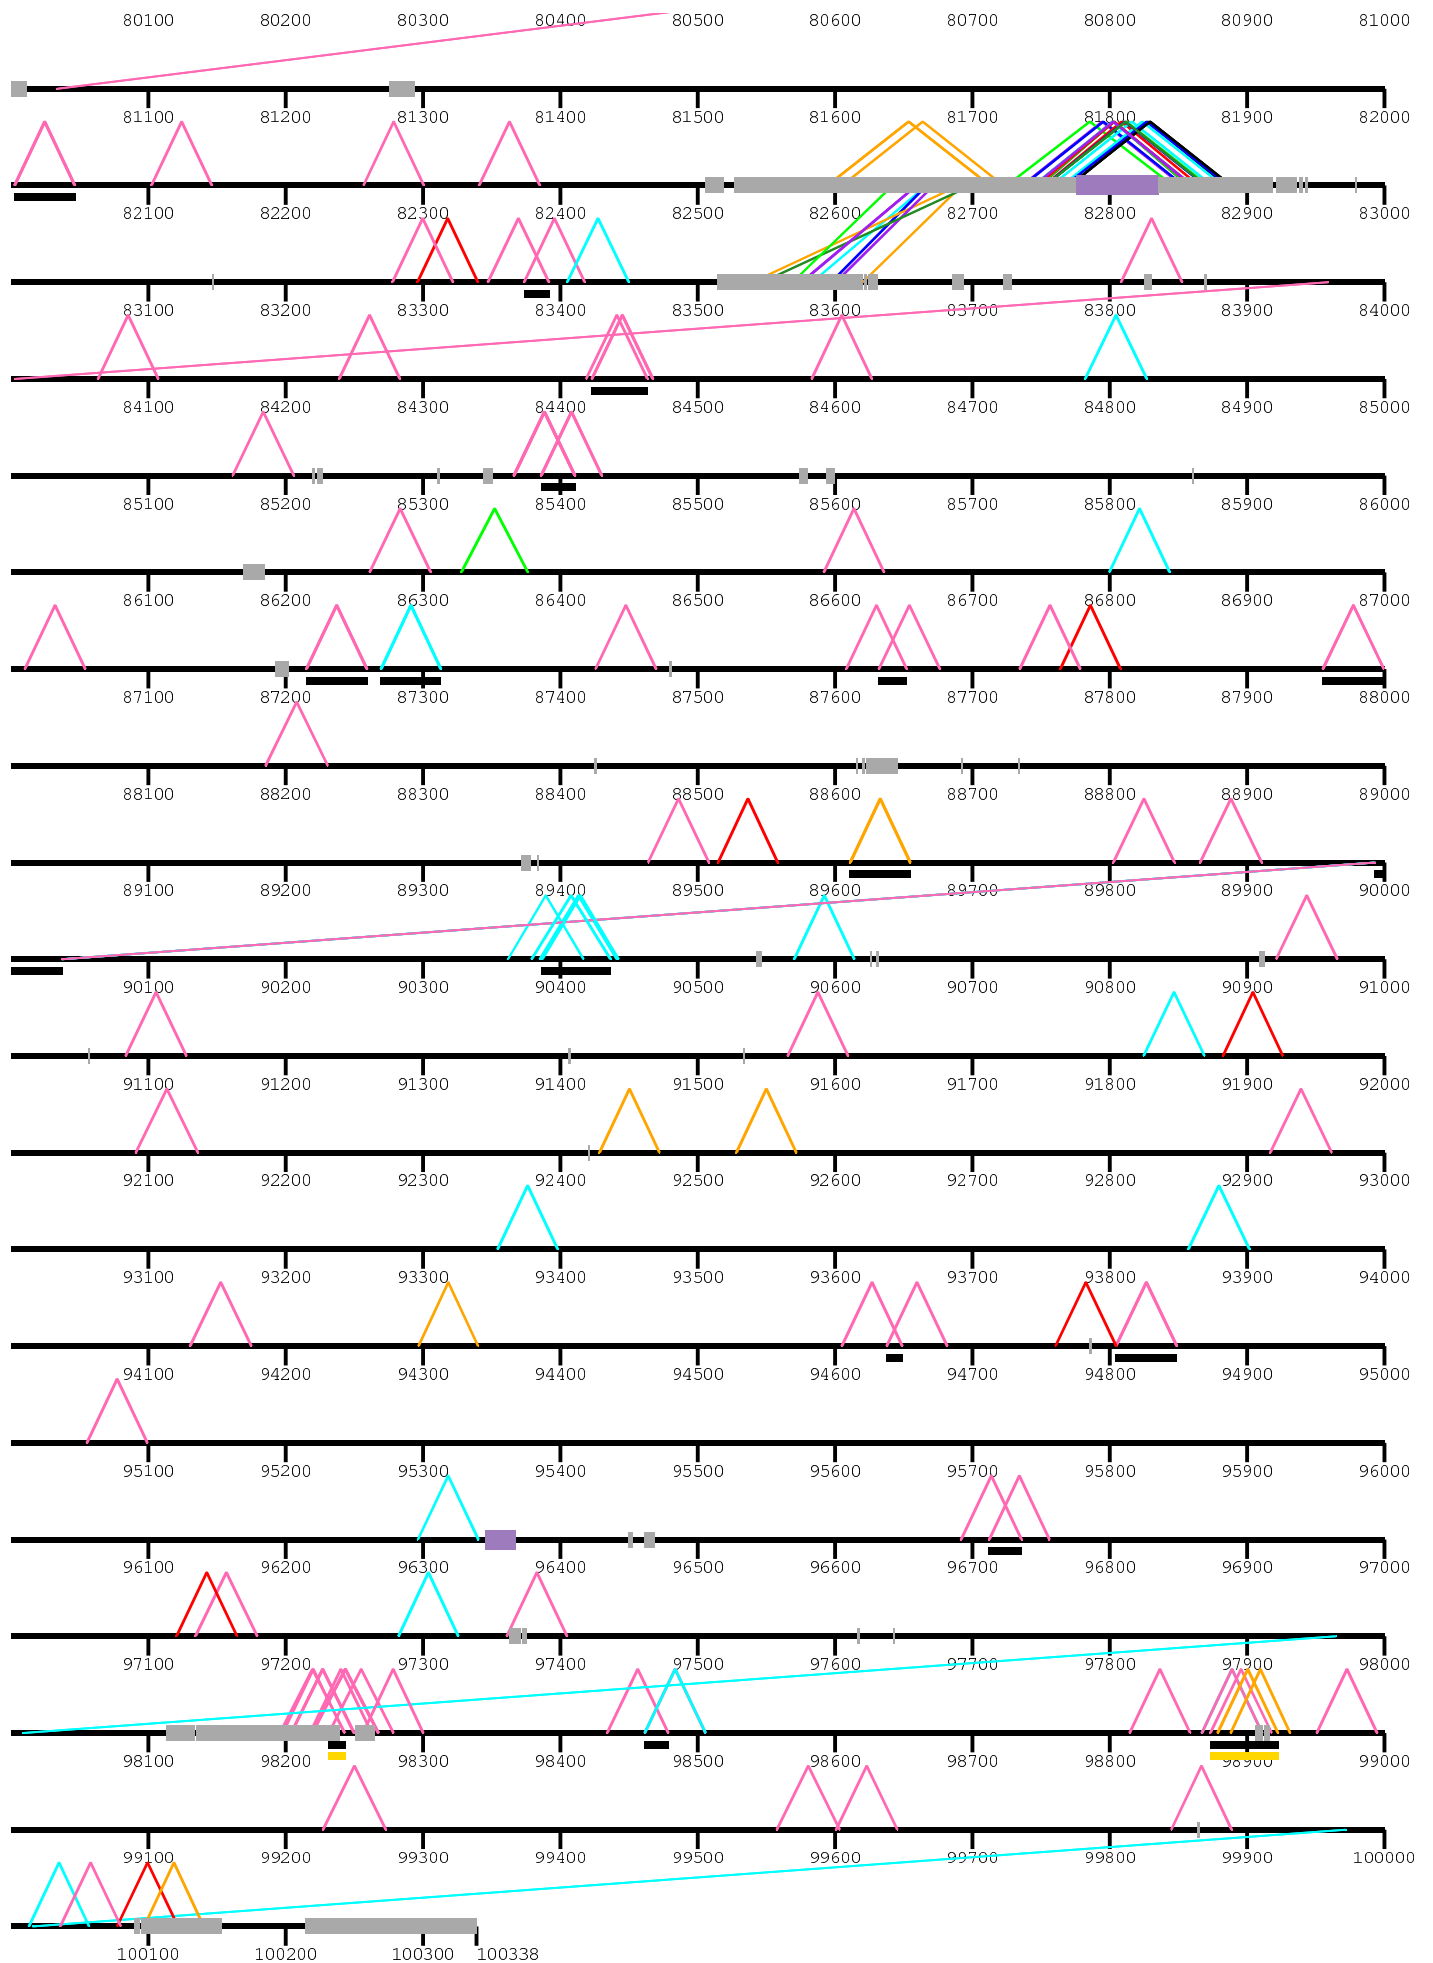



chr16

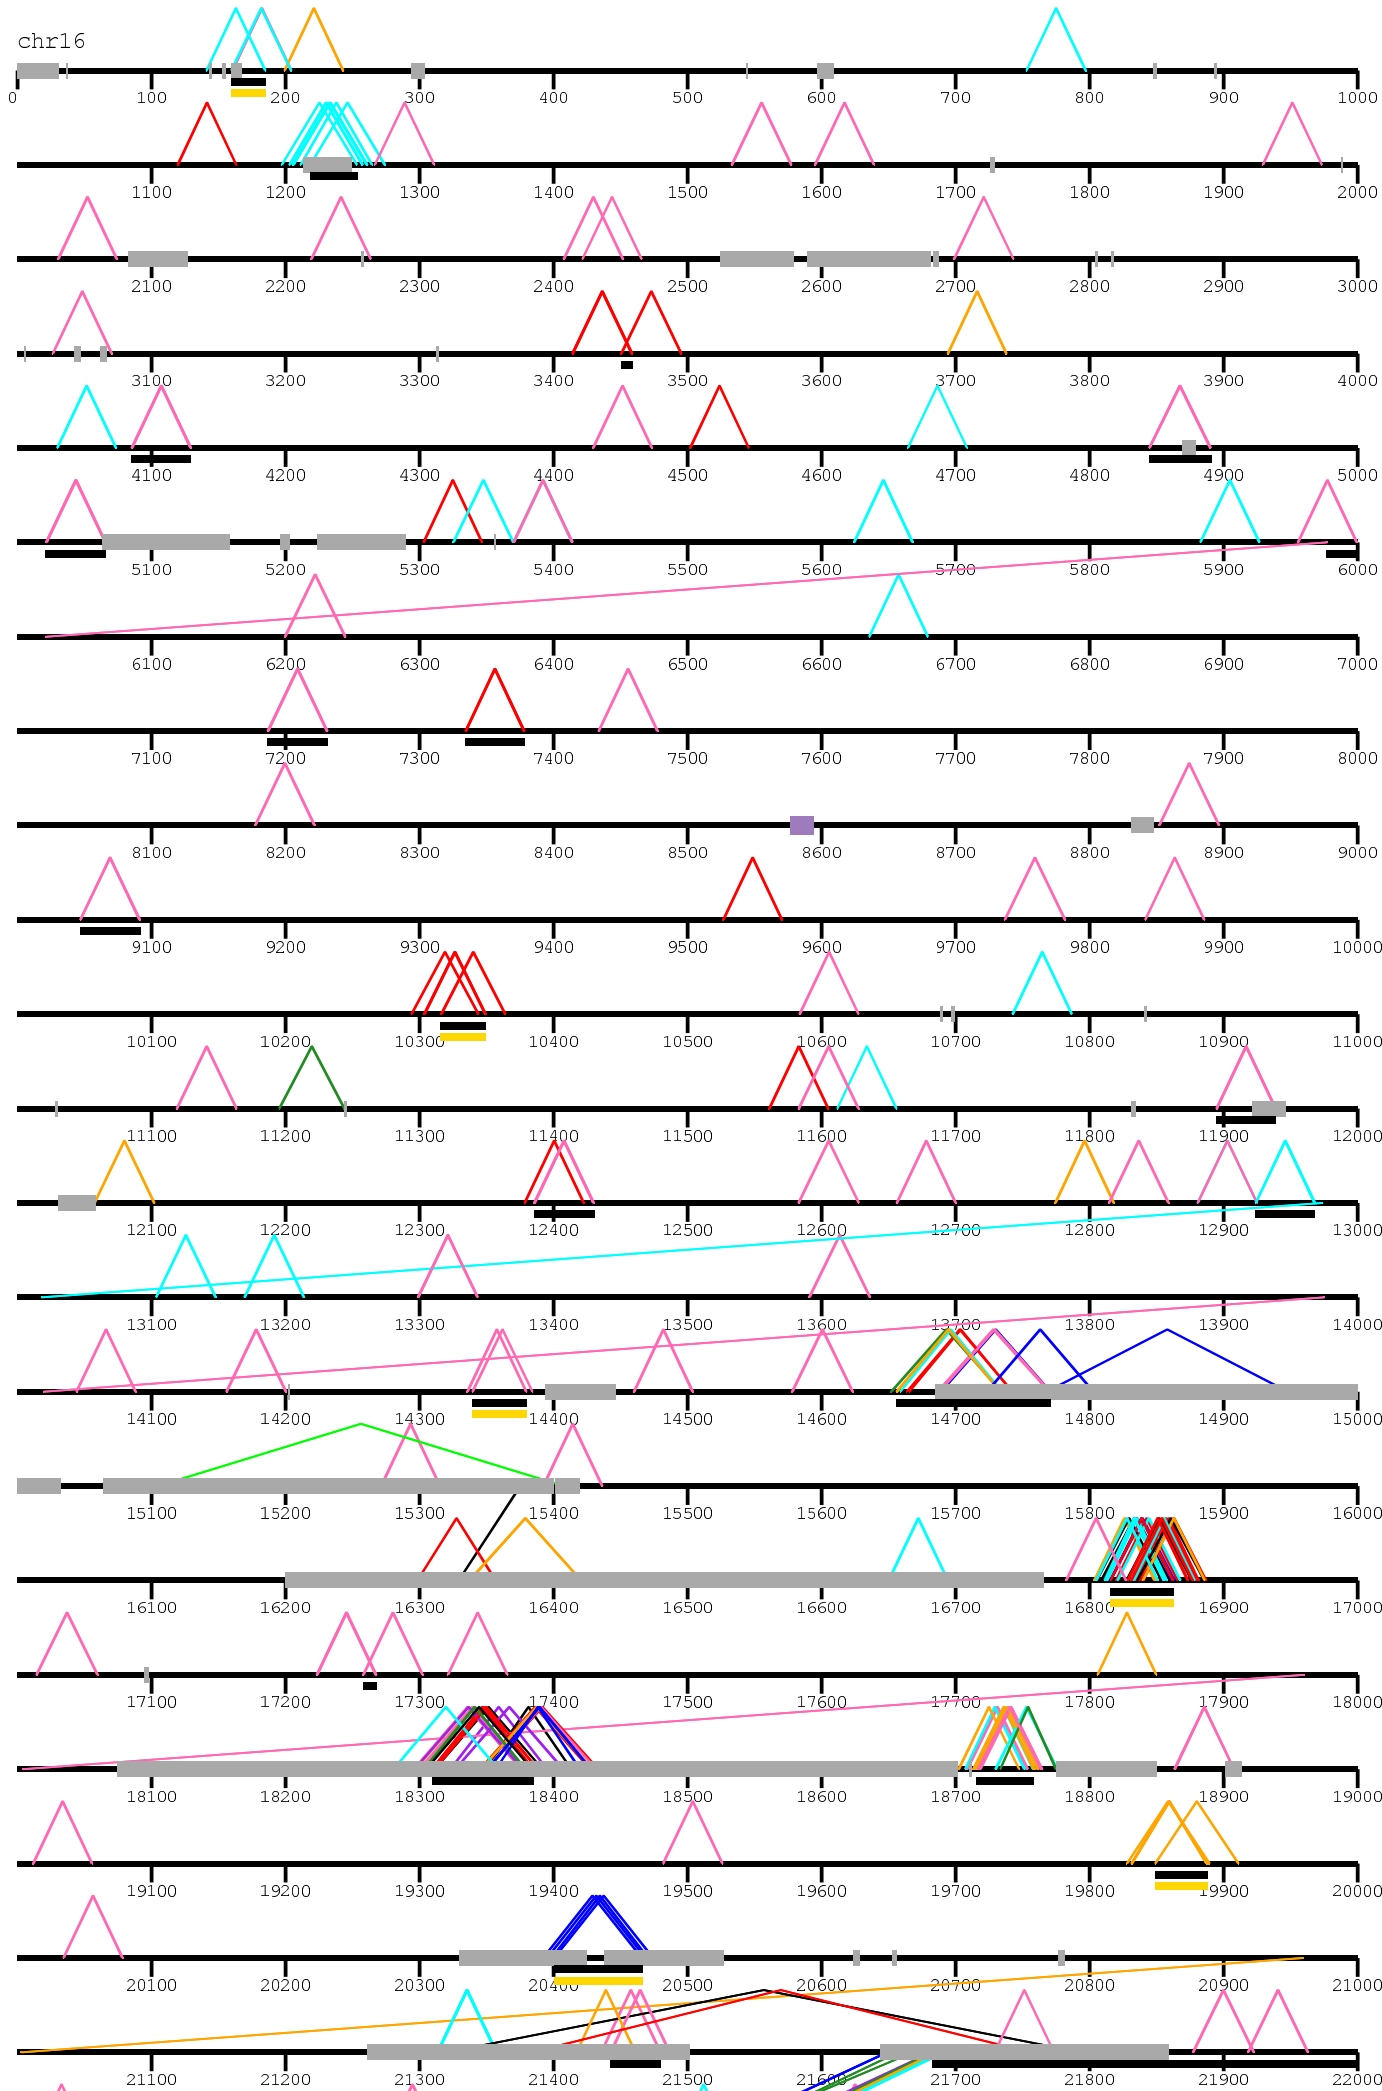

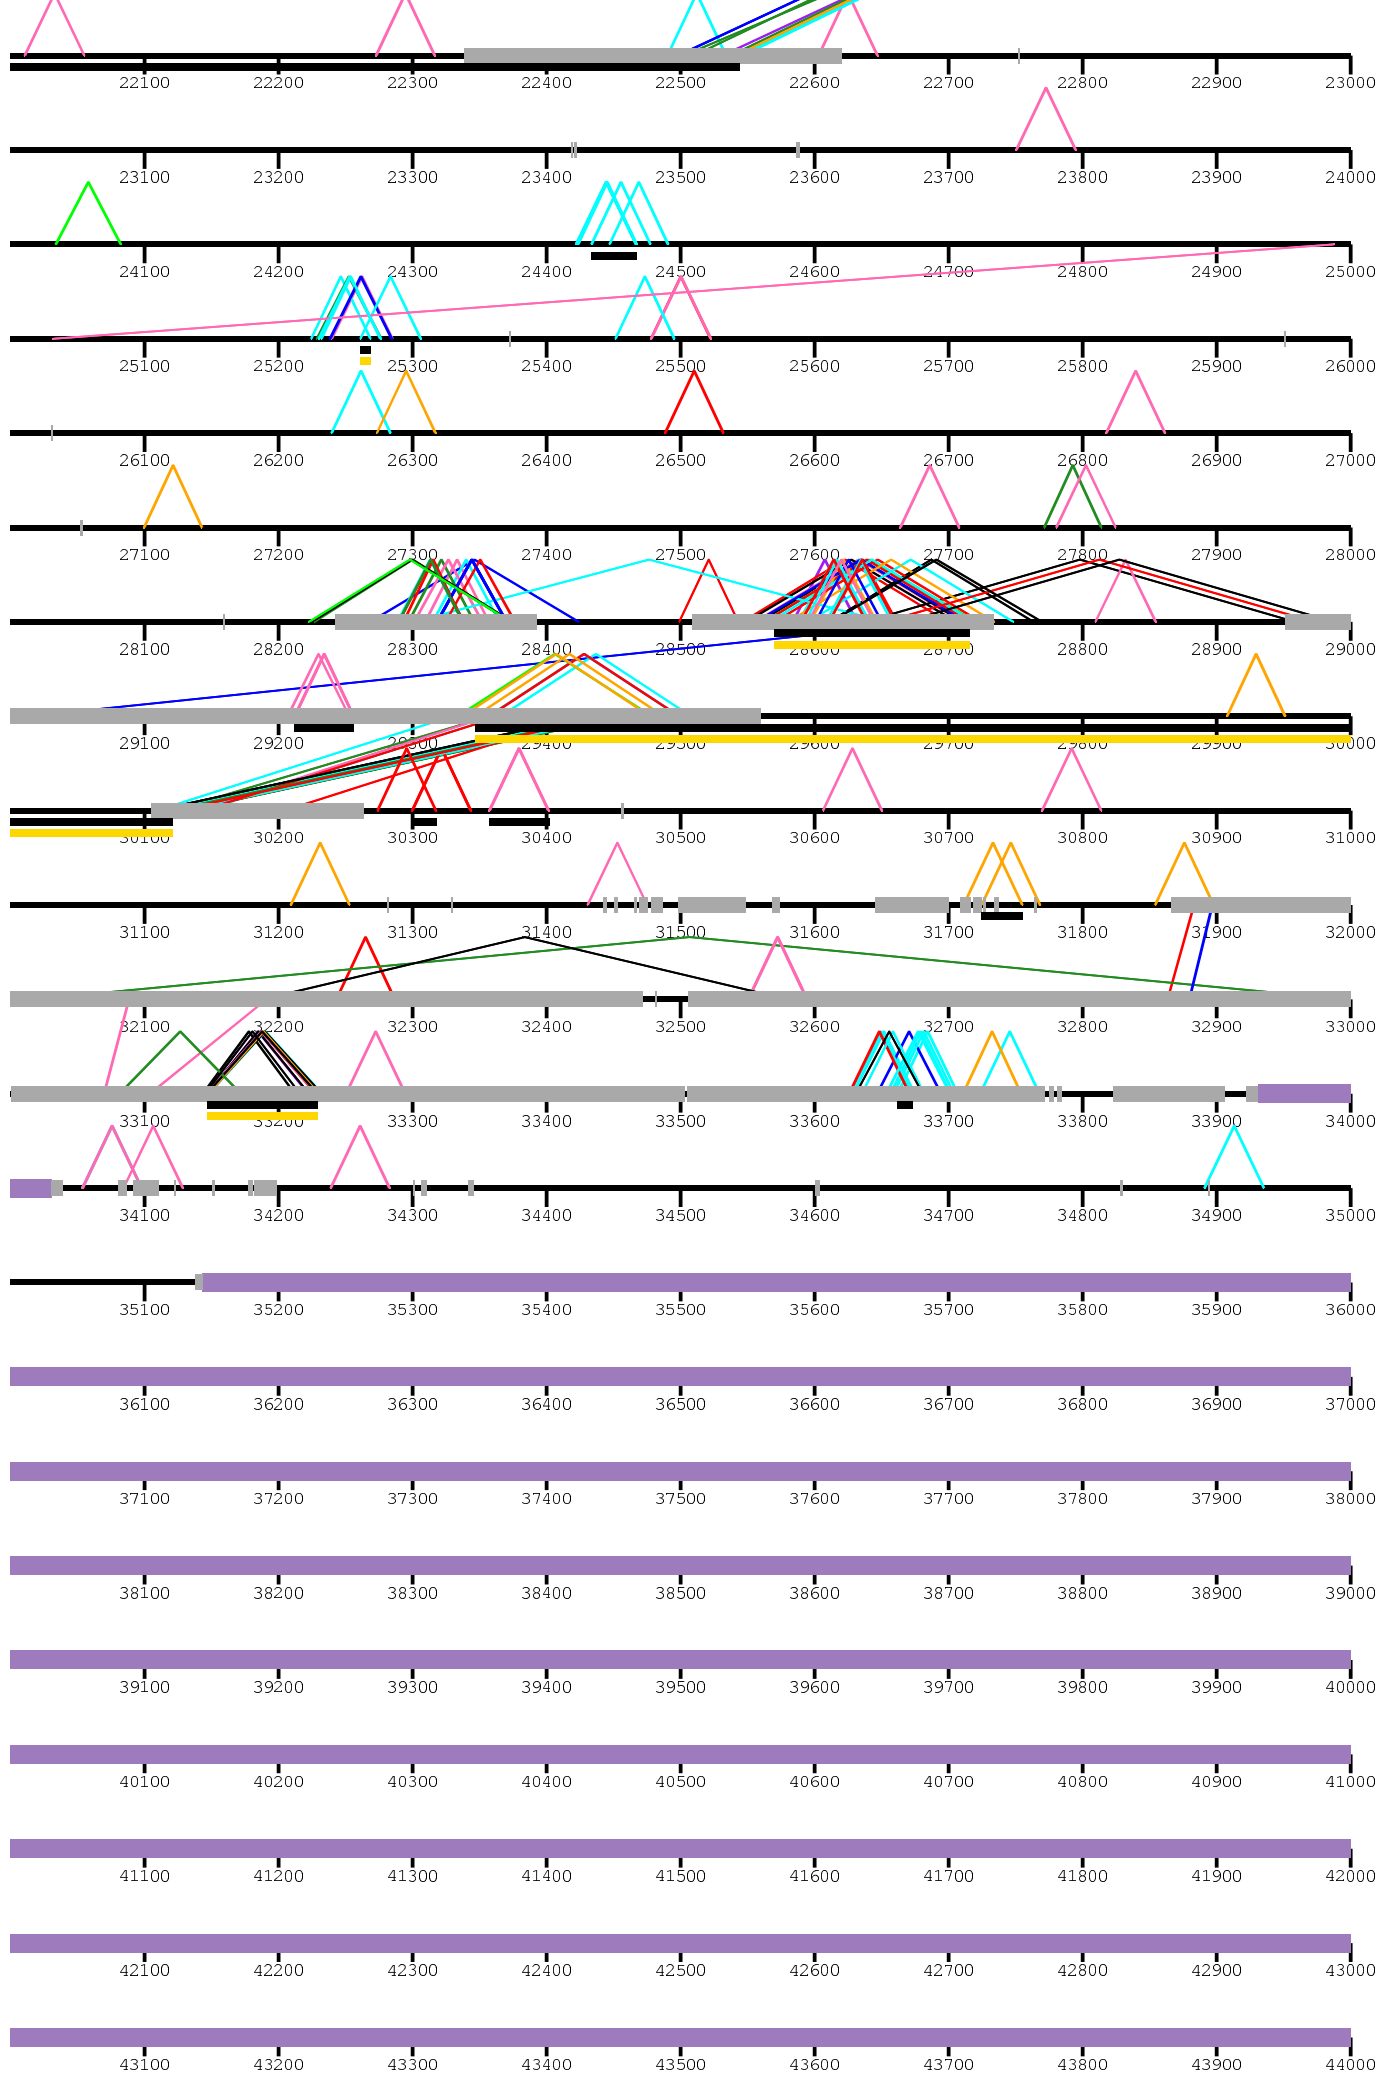

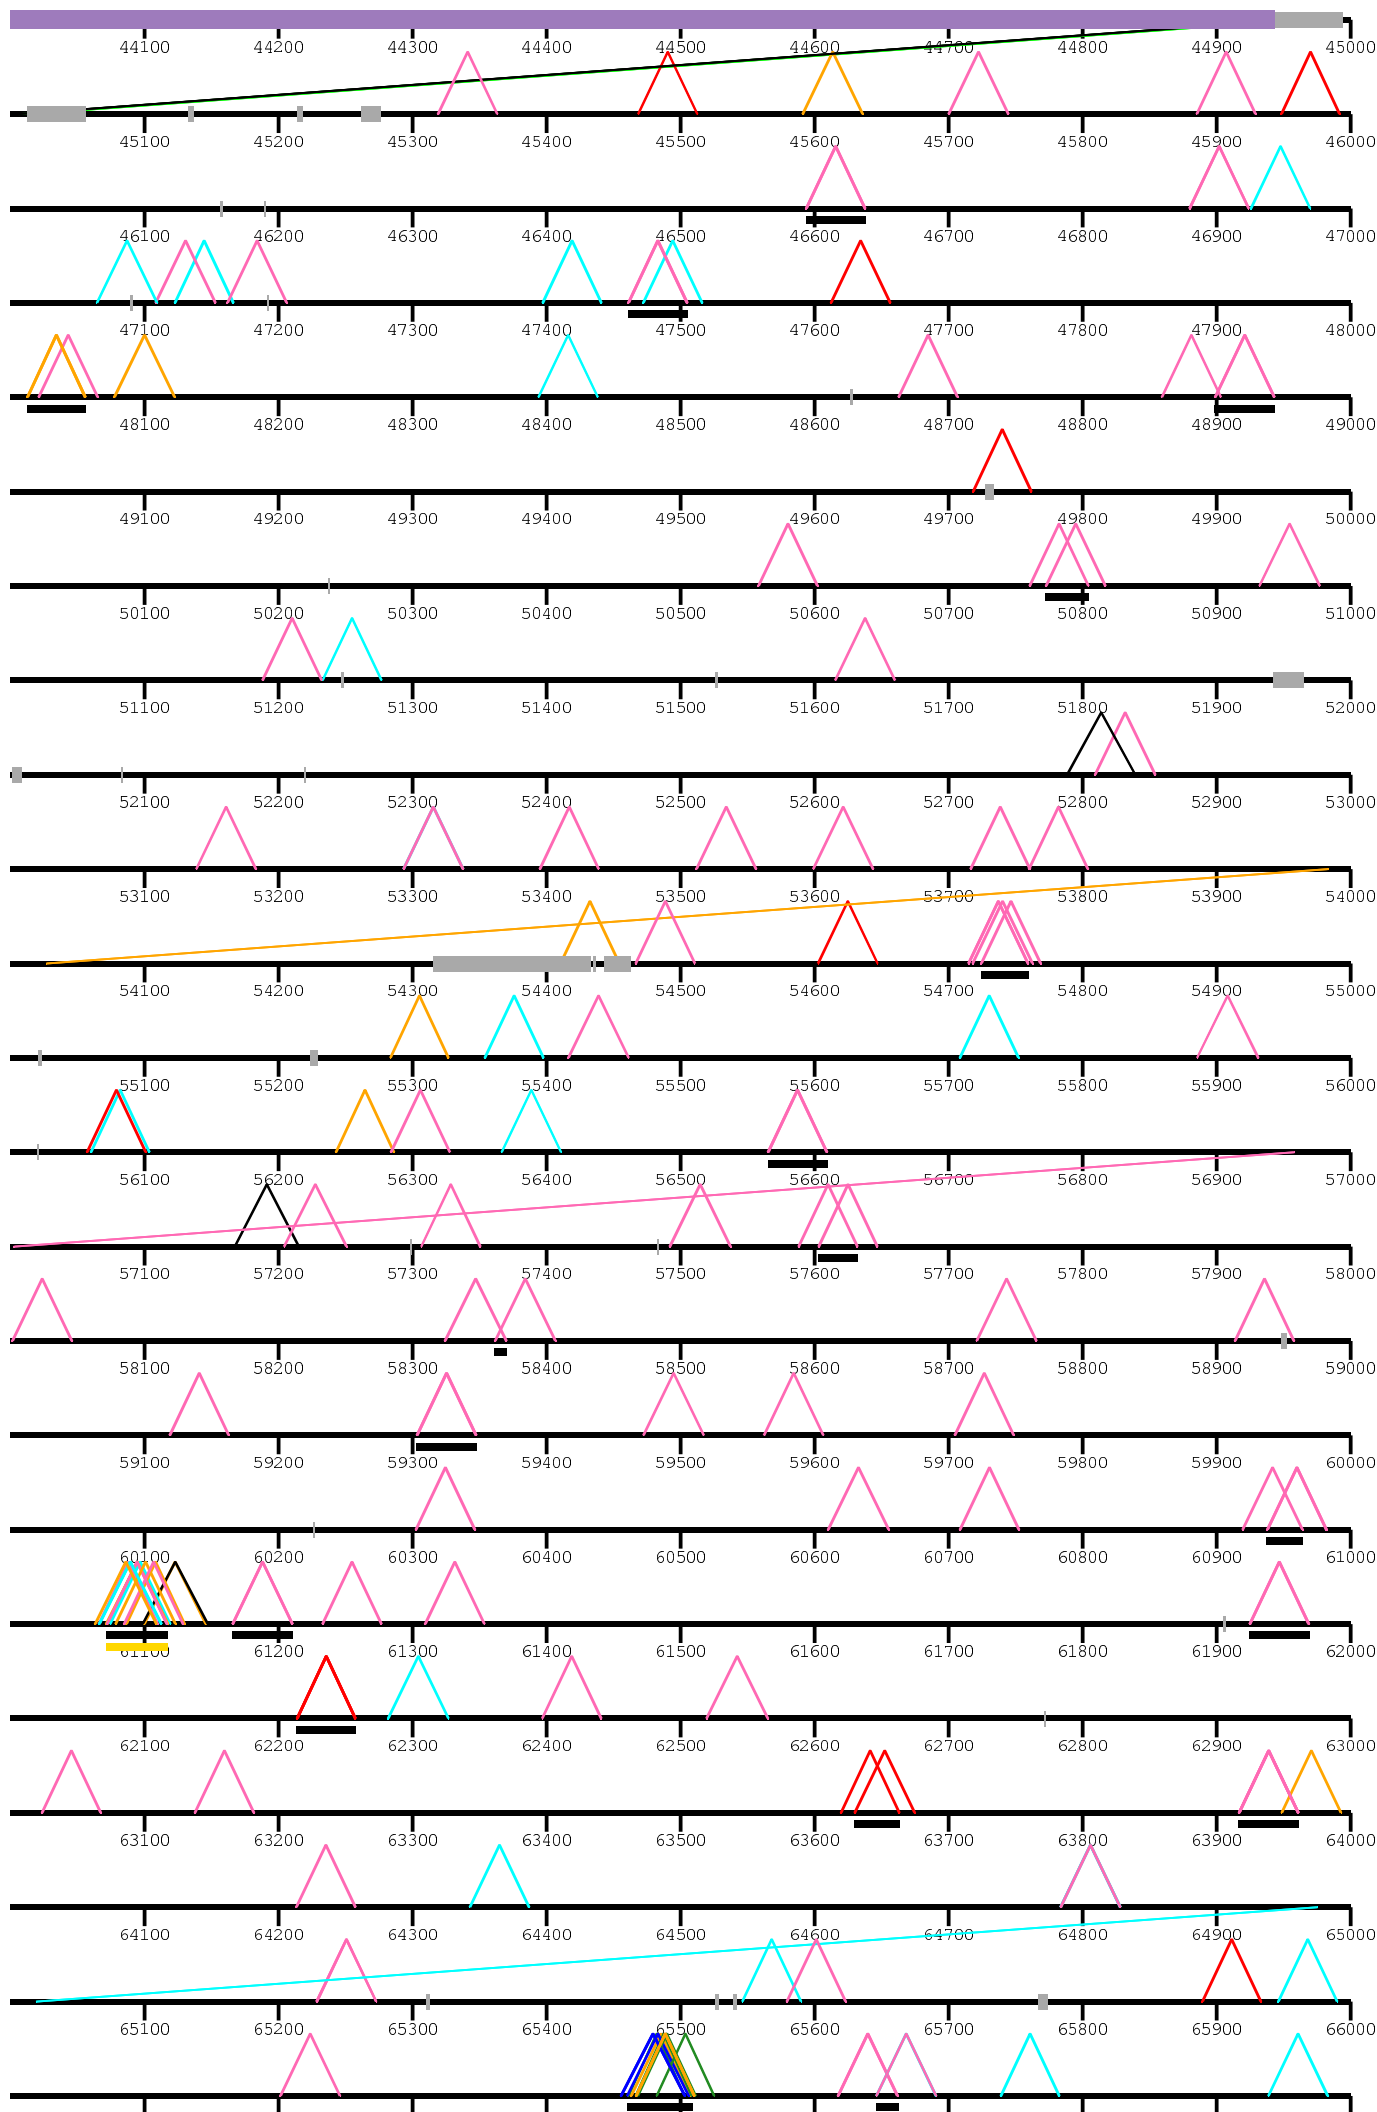

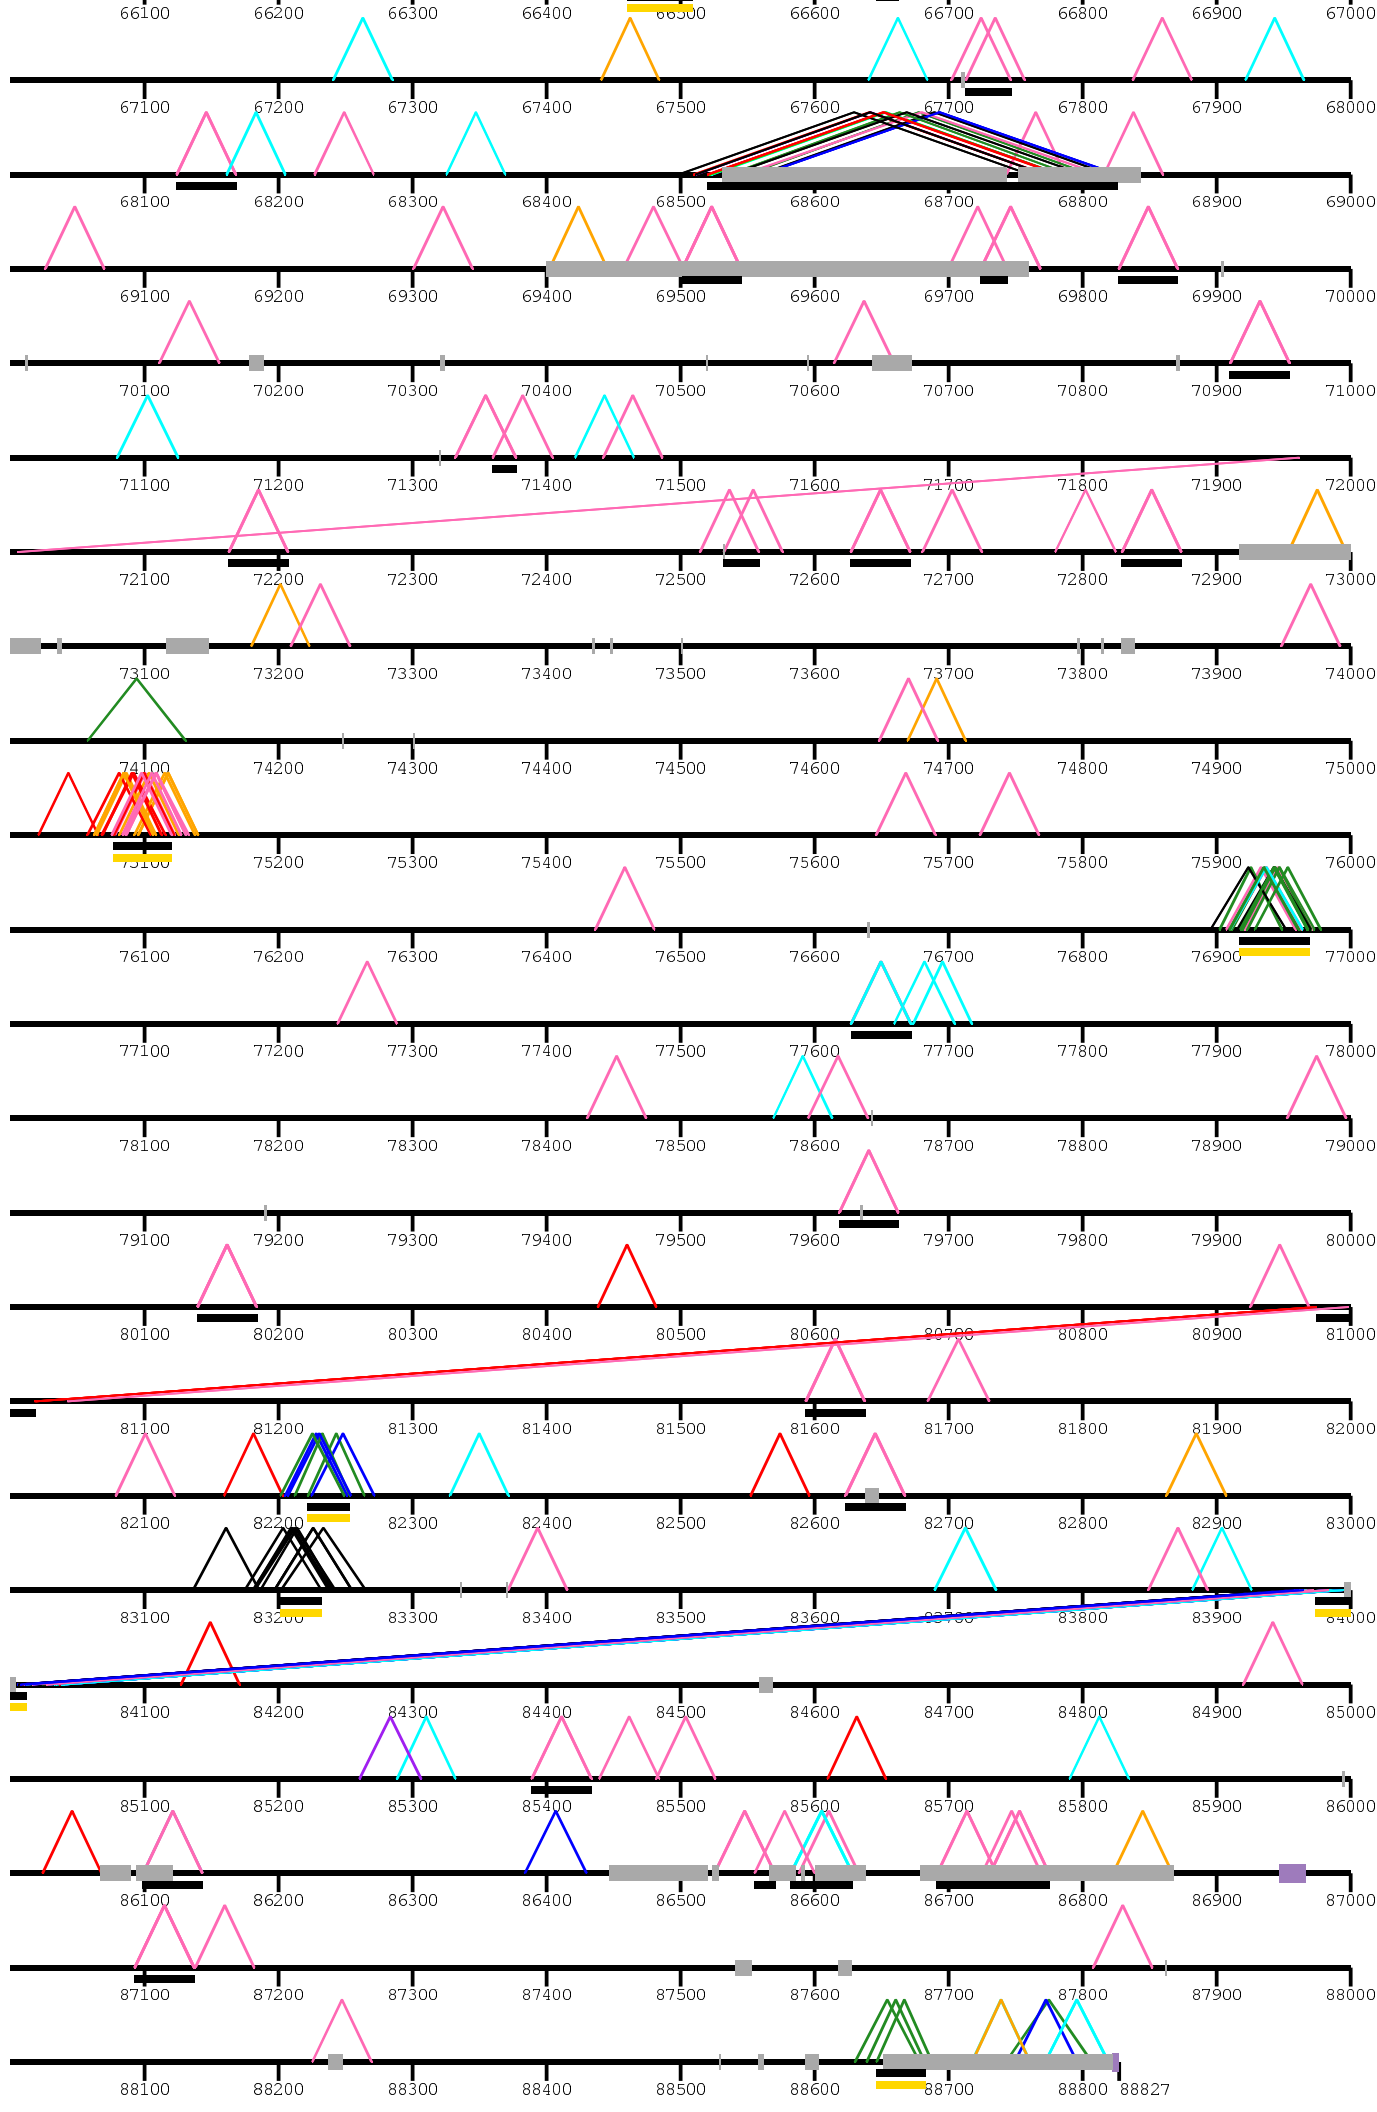

chr17

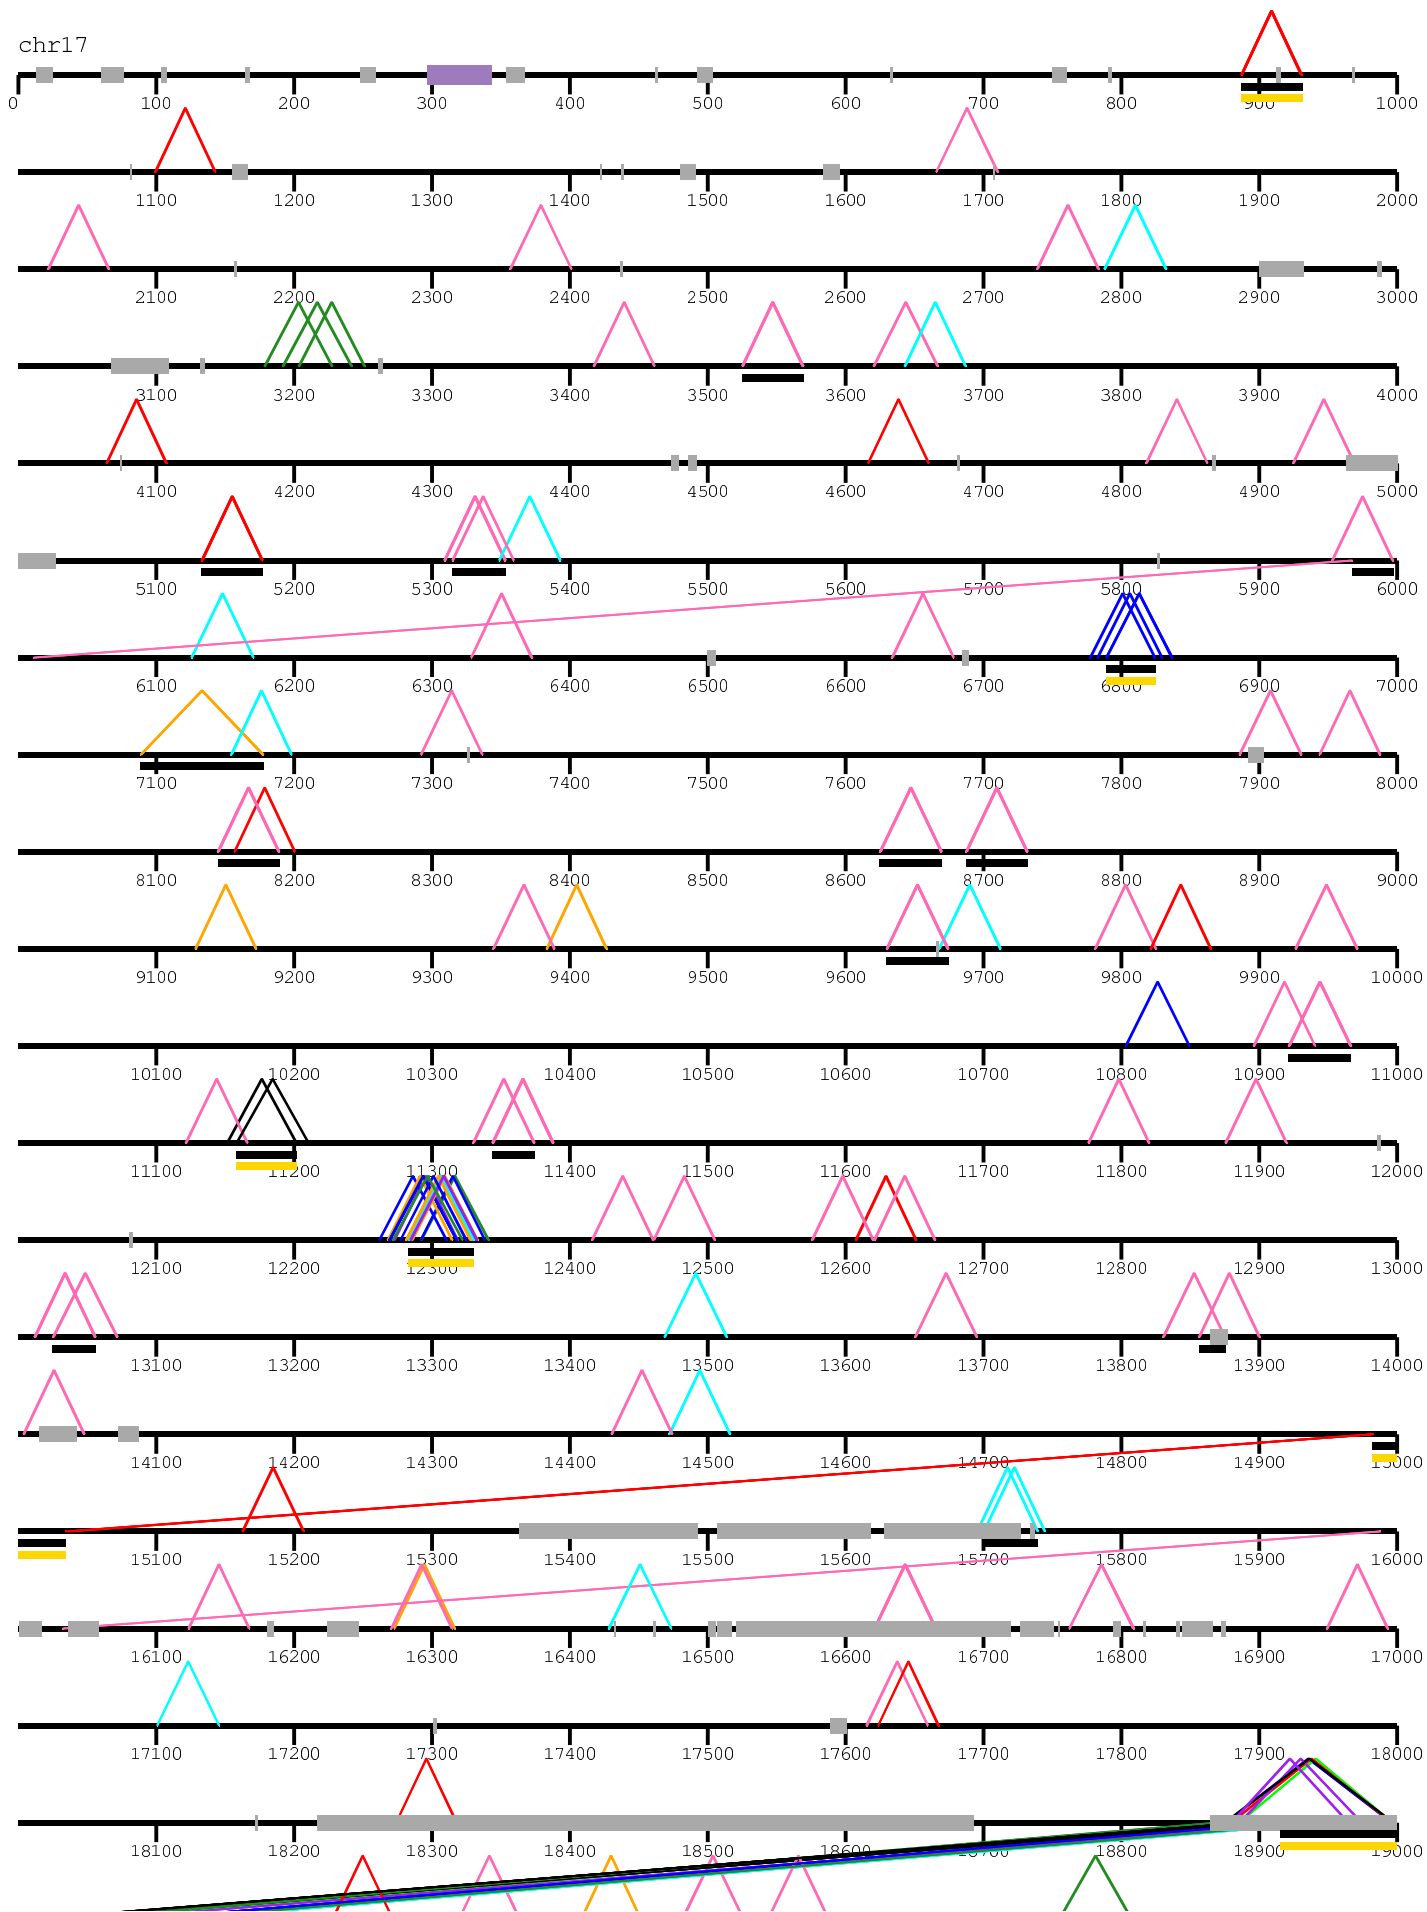

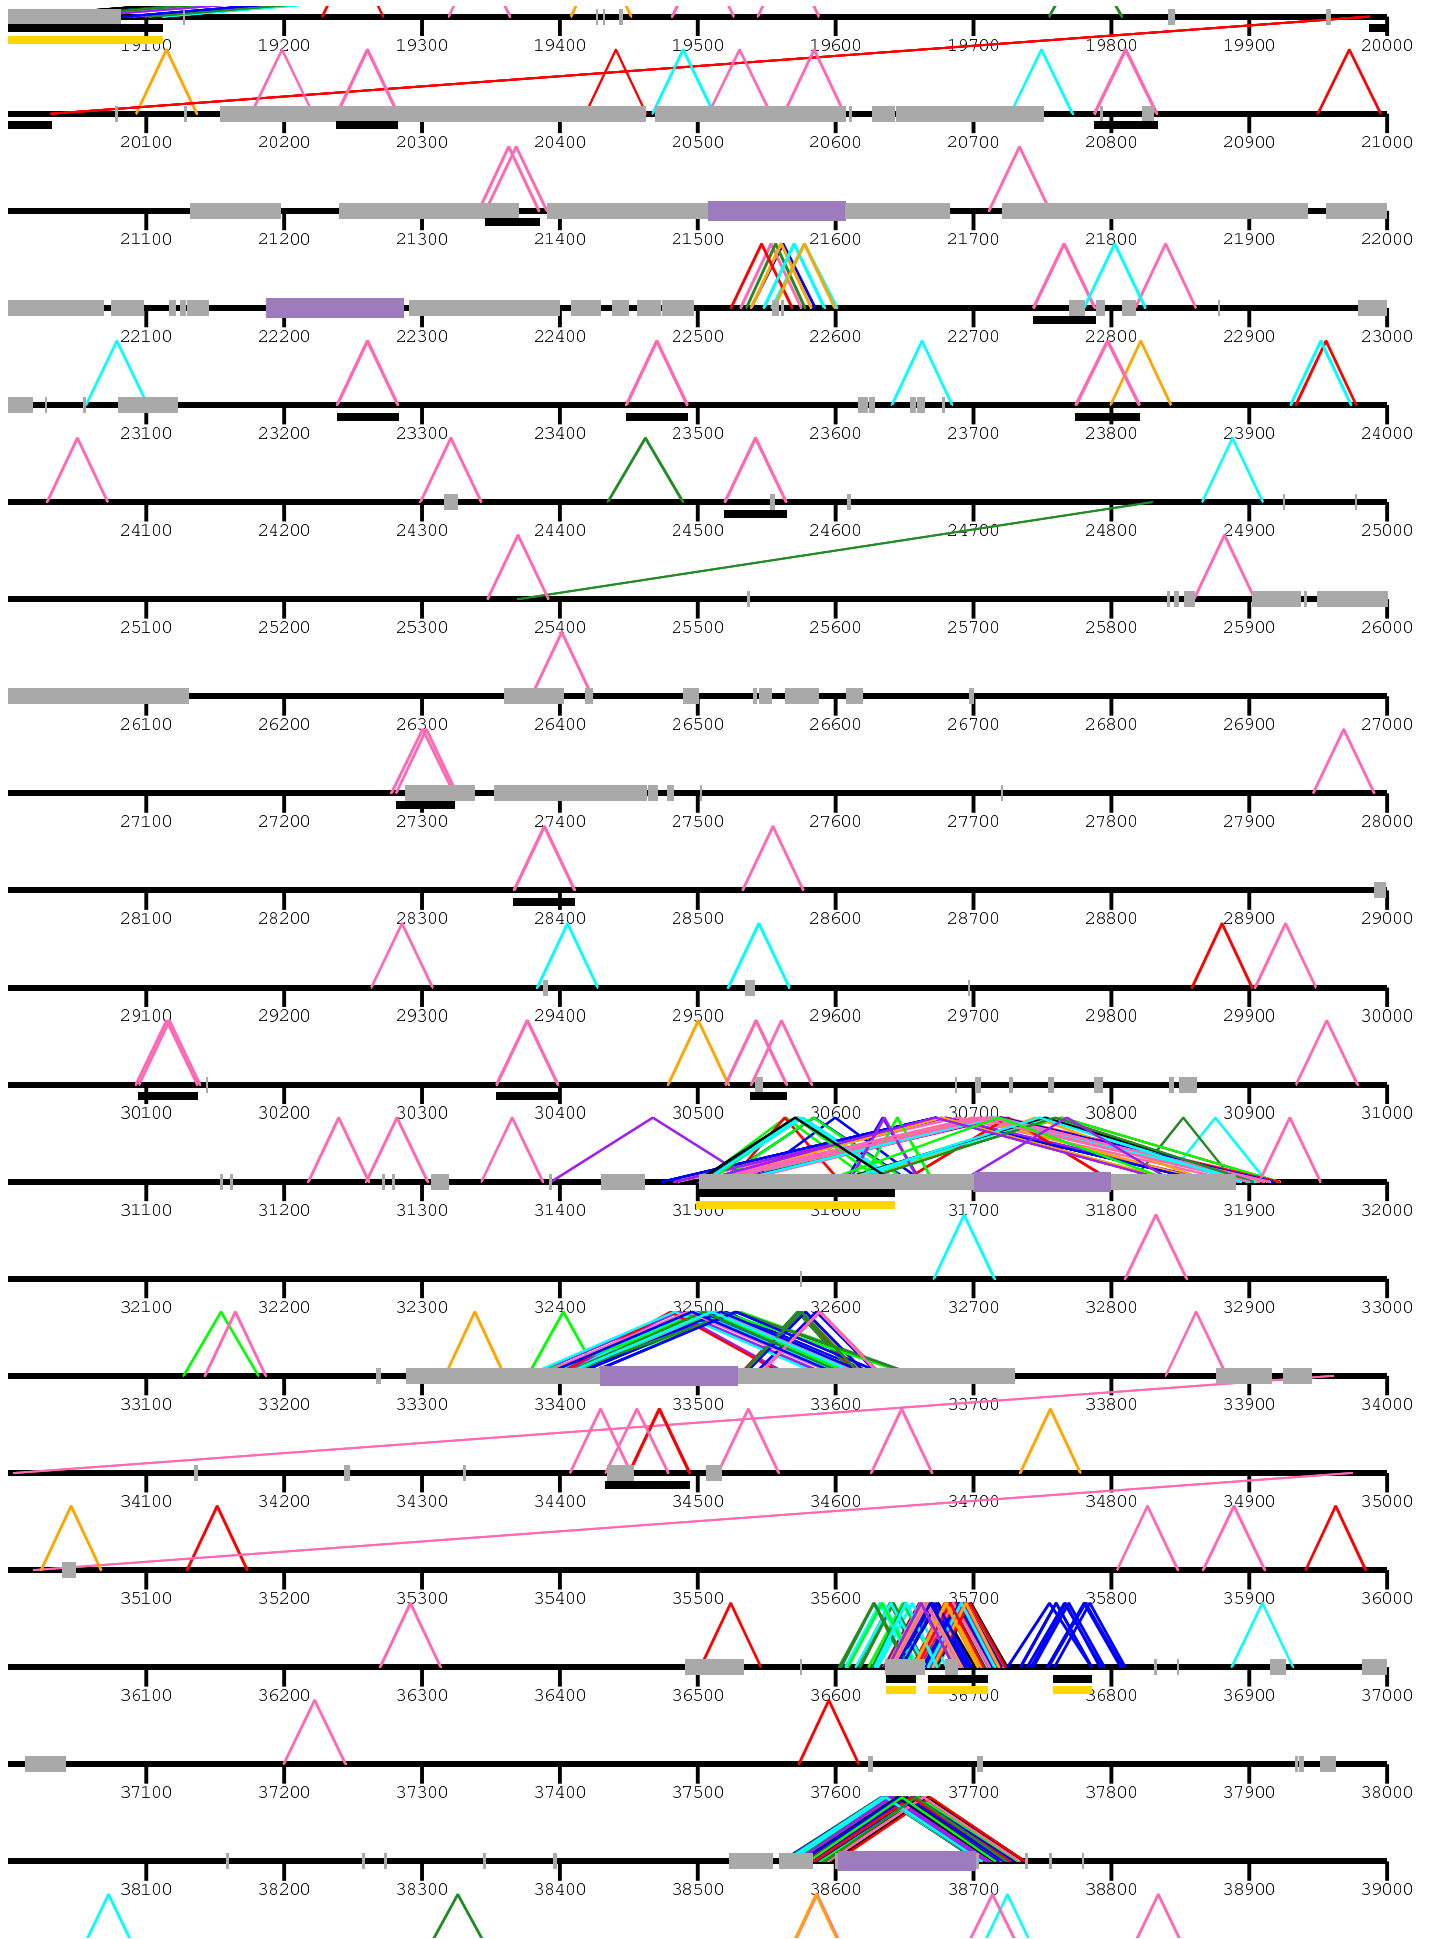

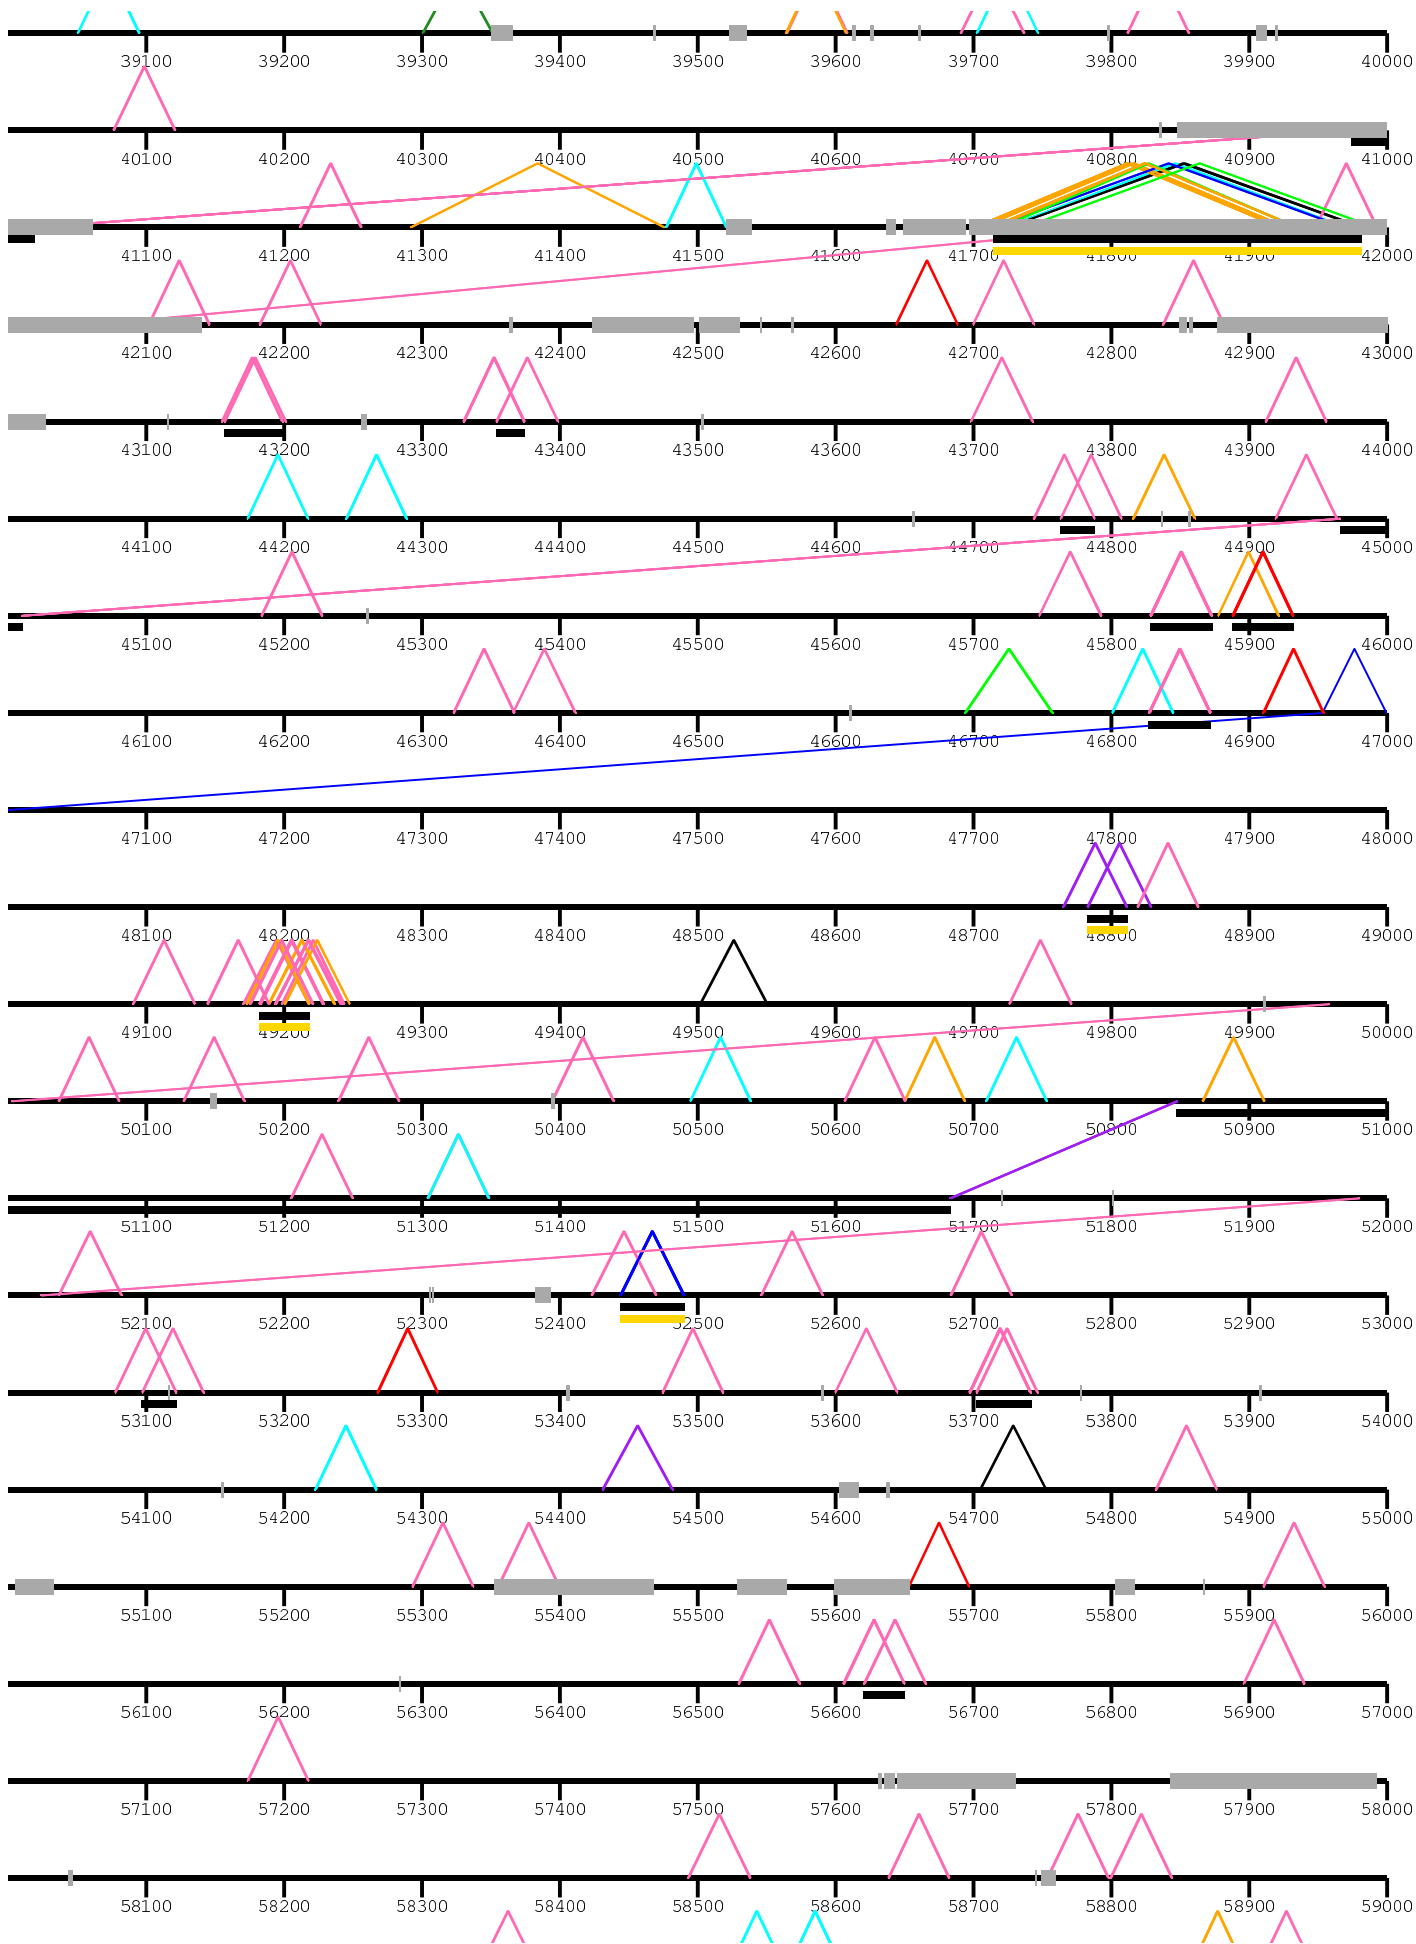

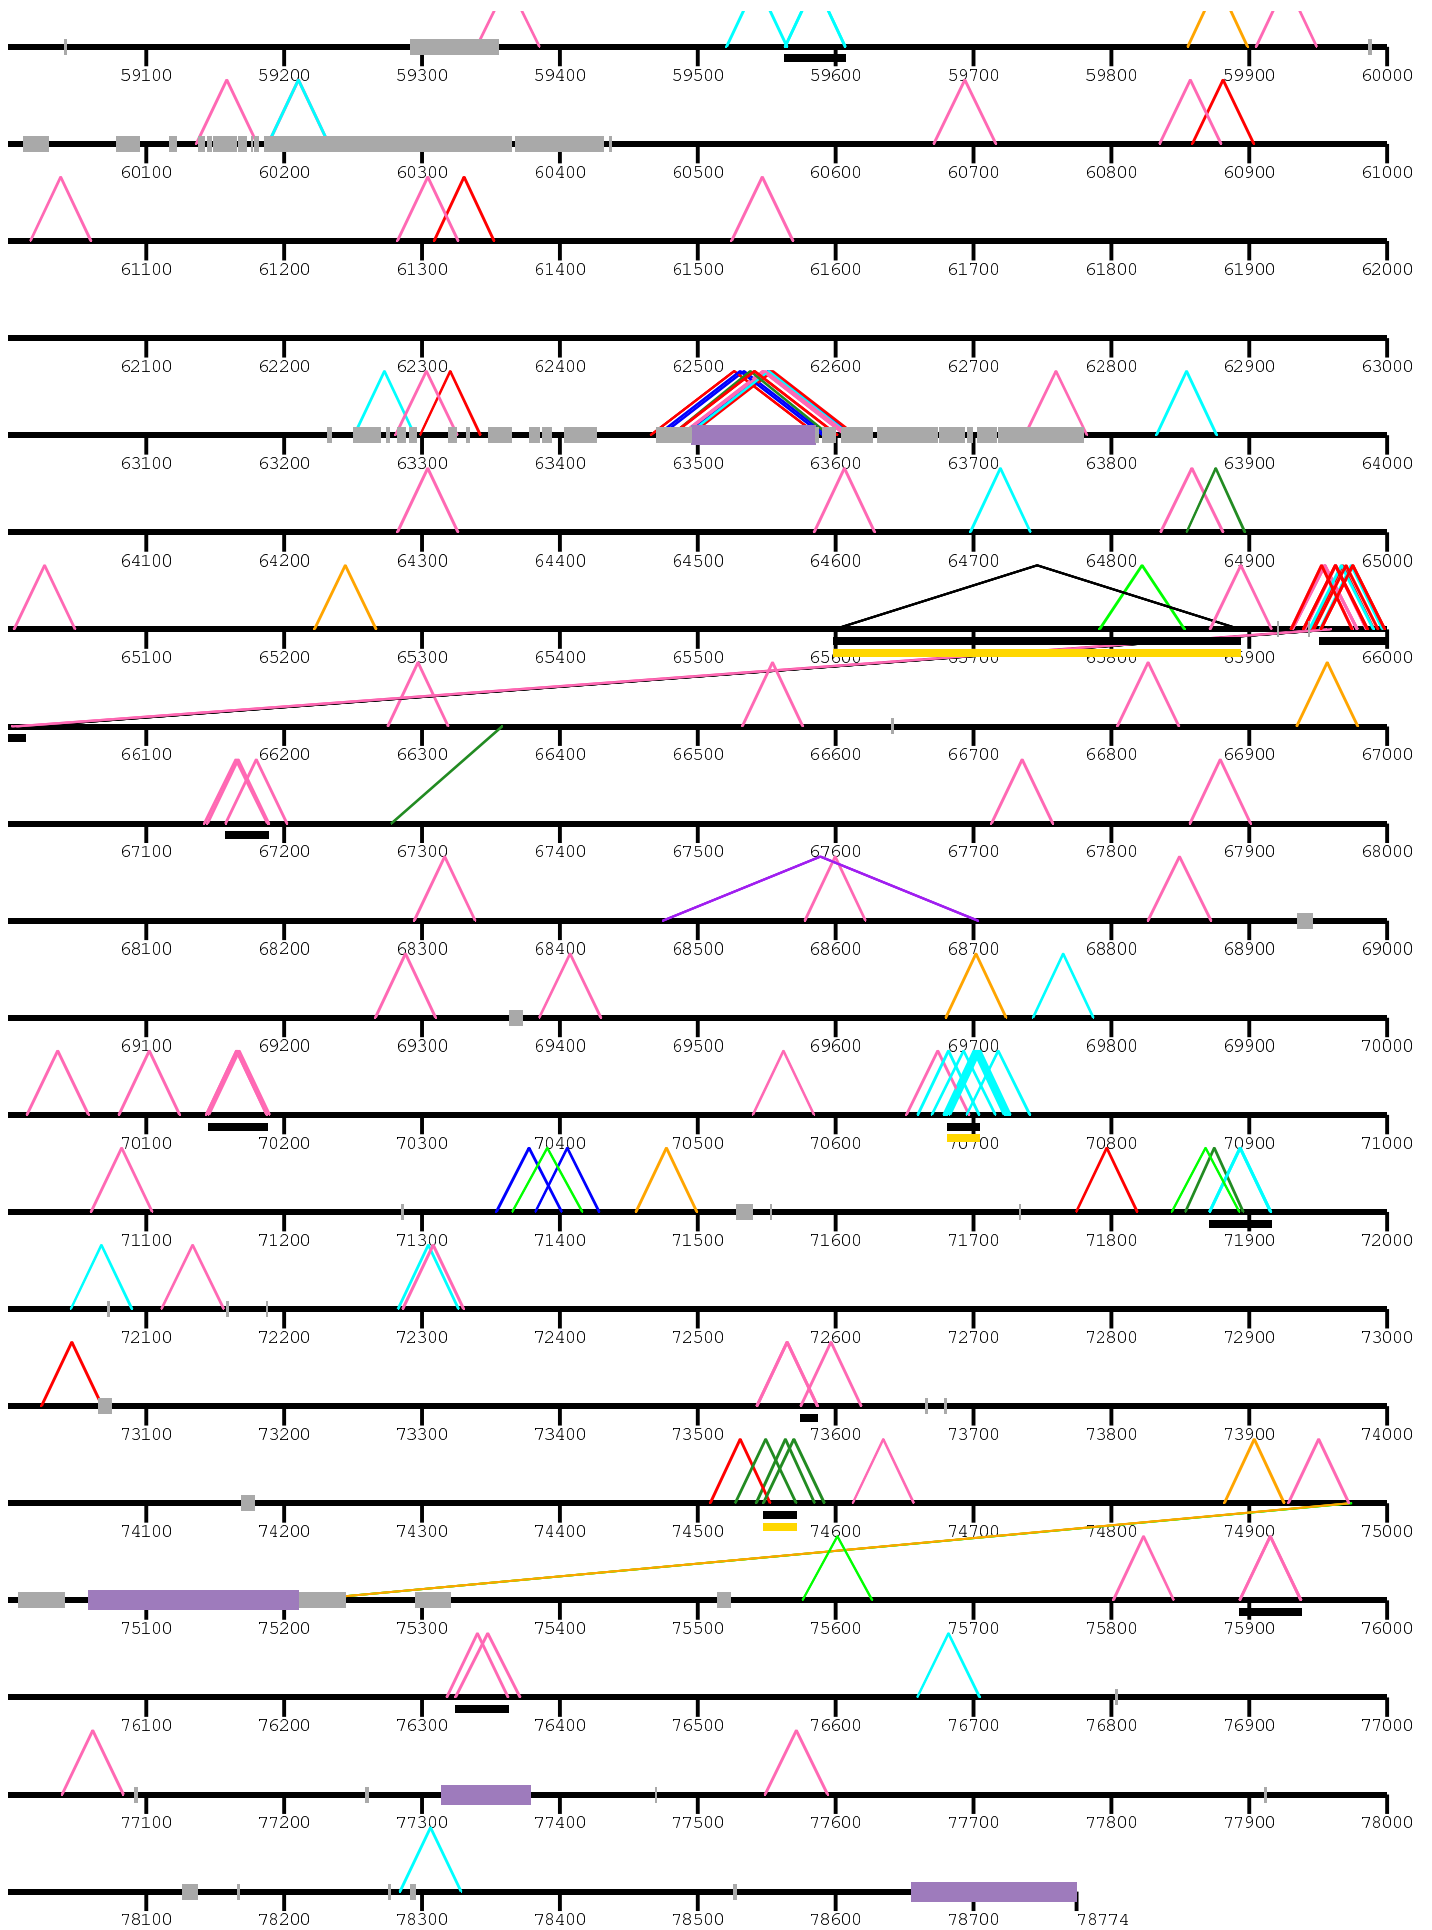



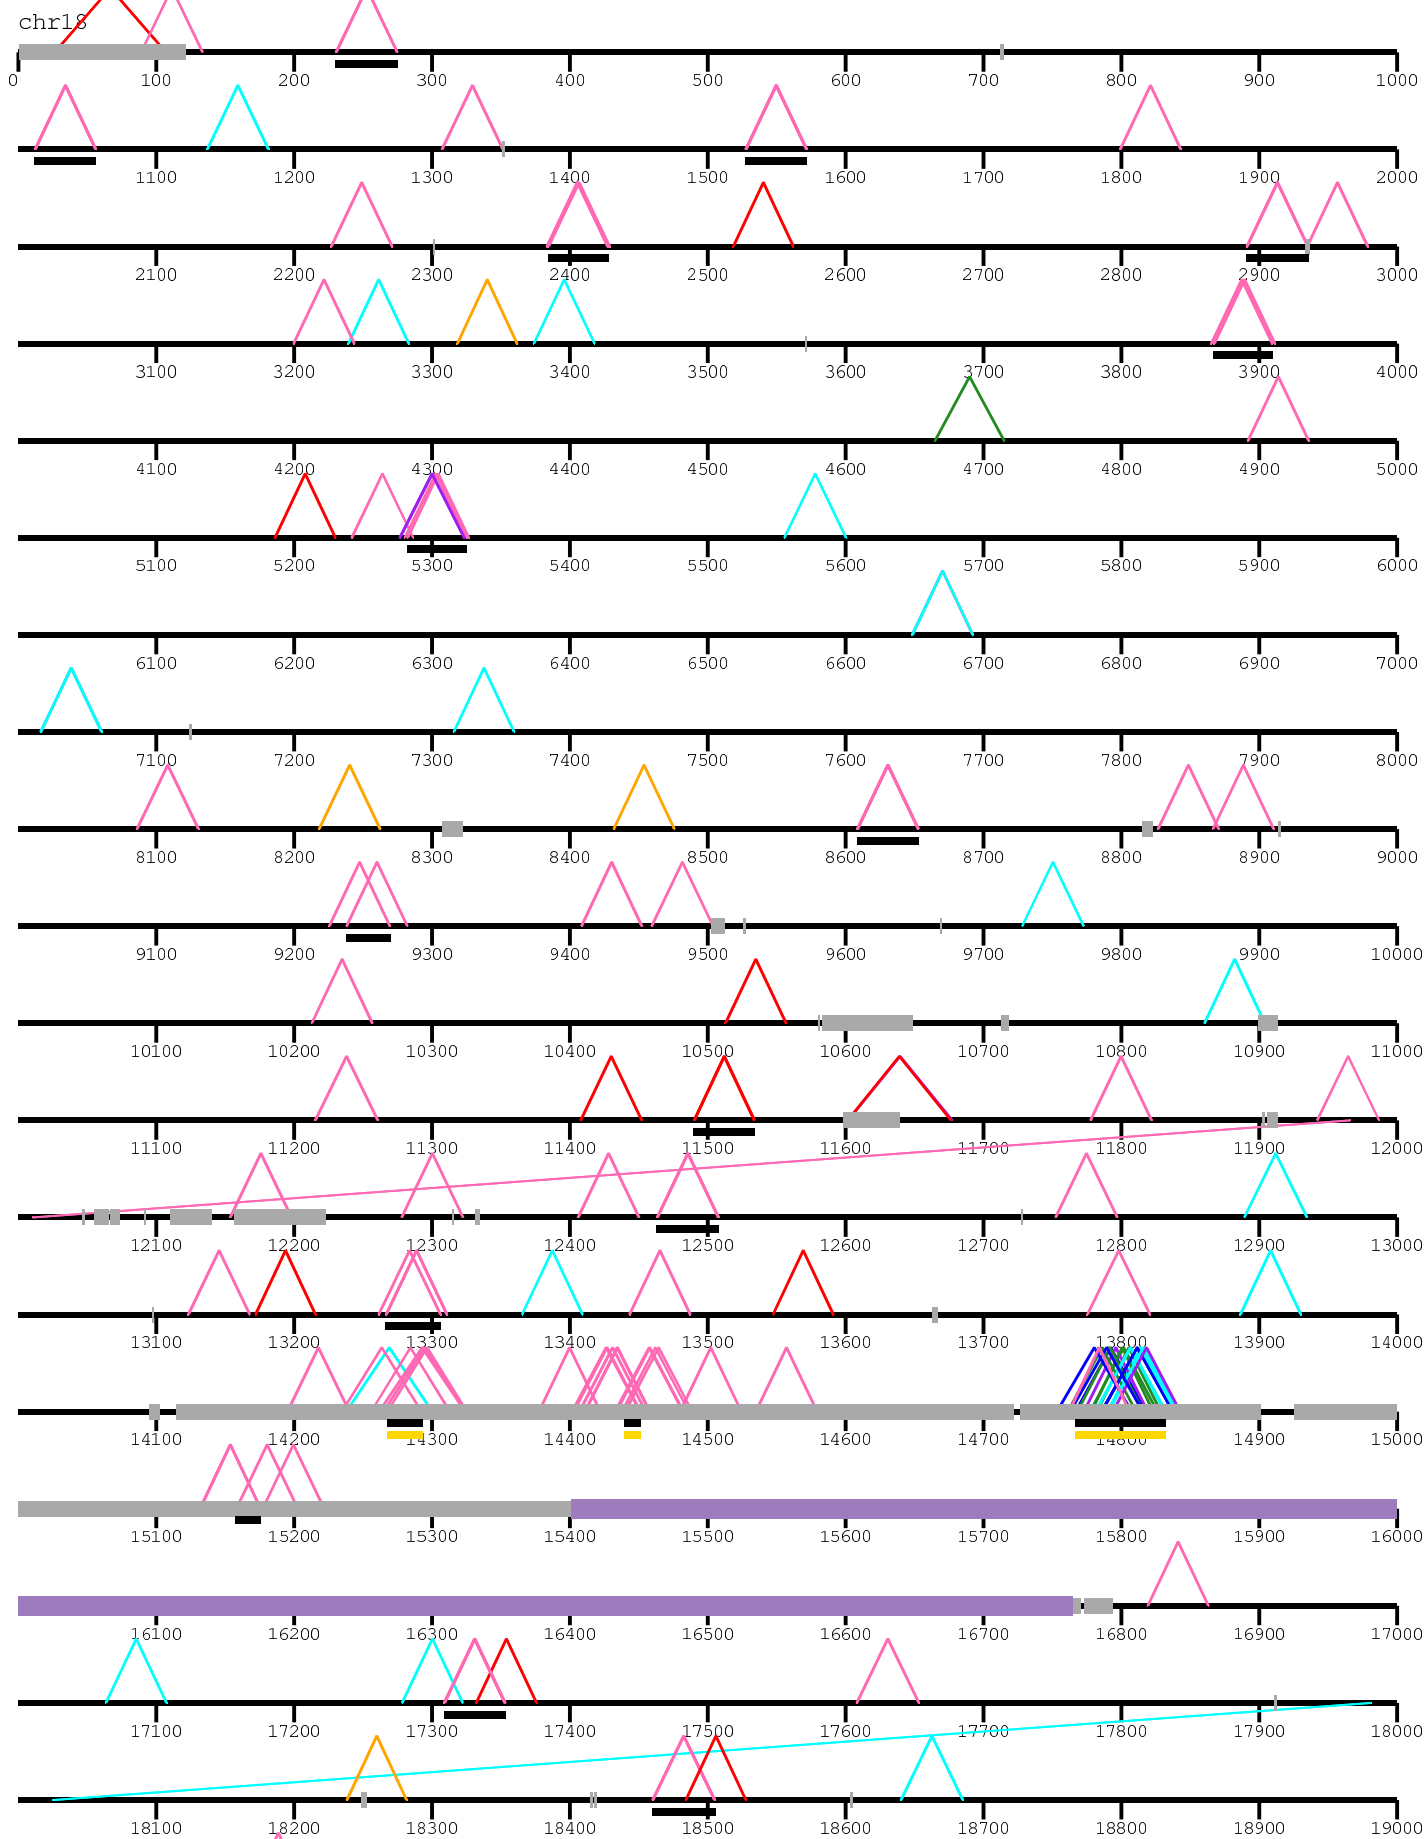

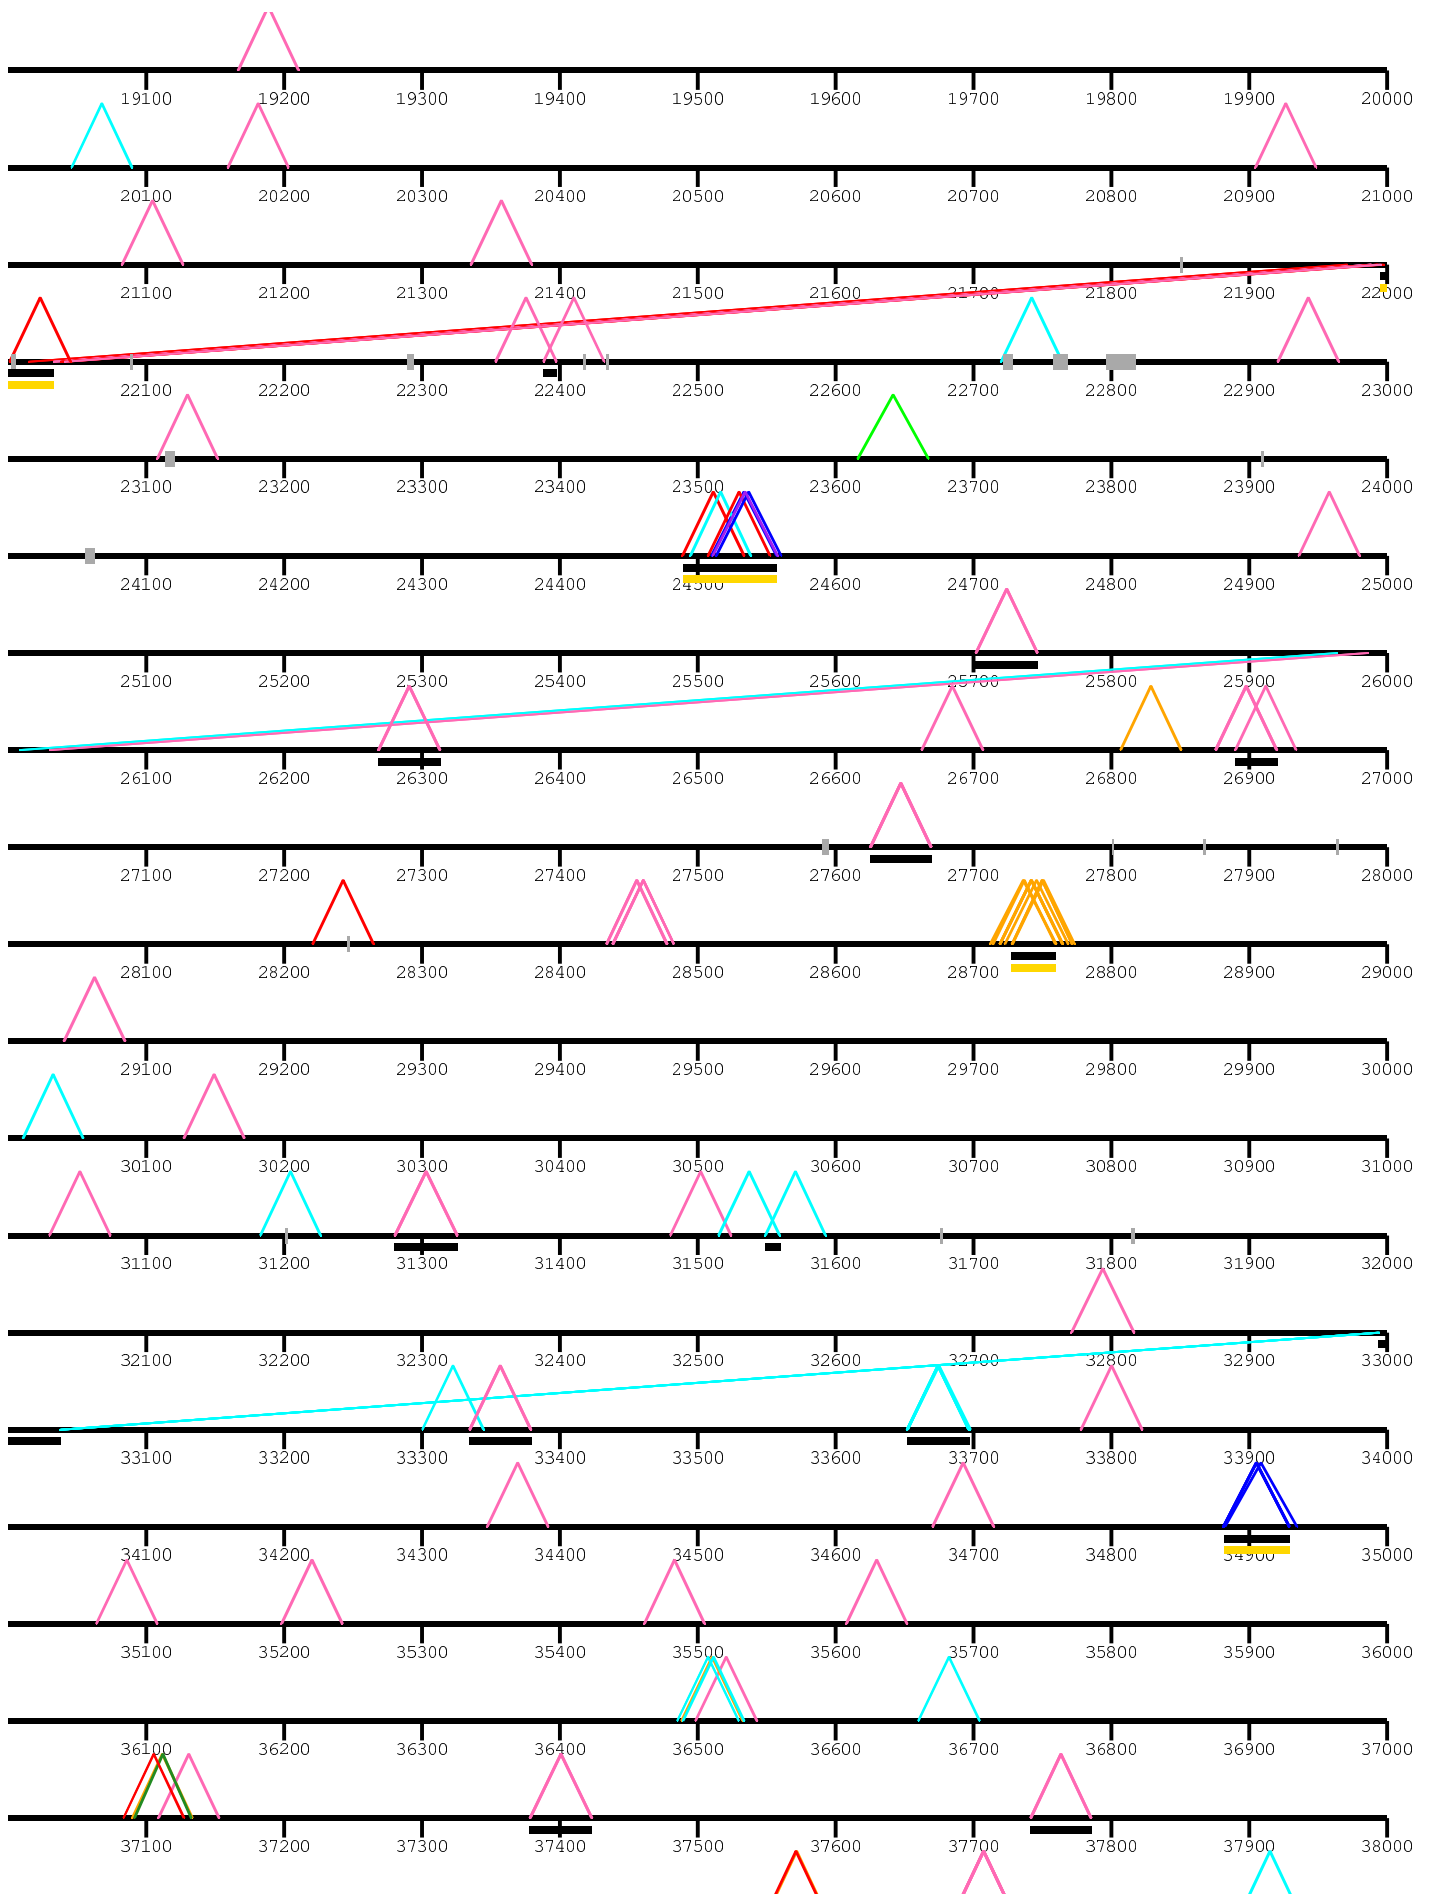

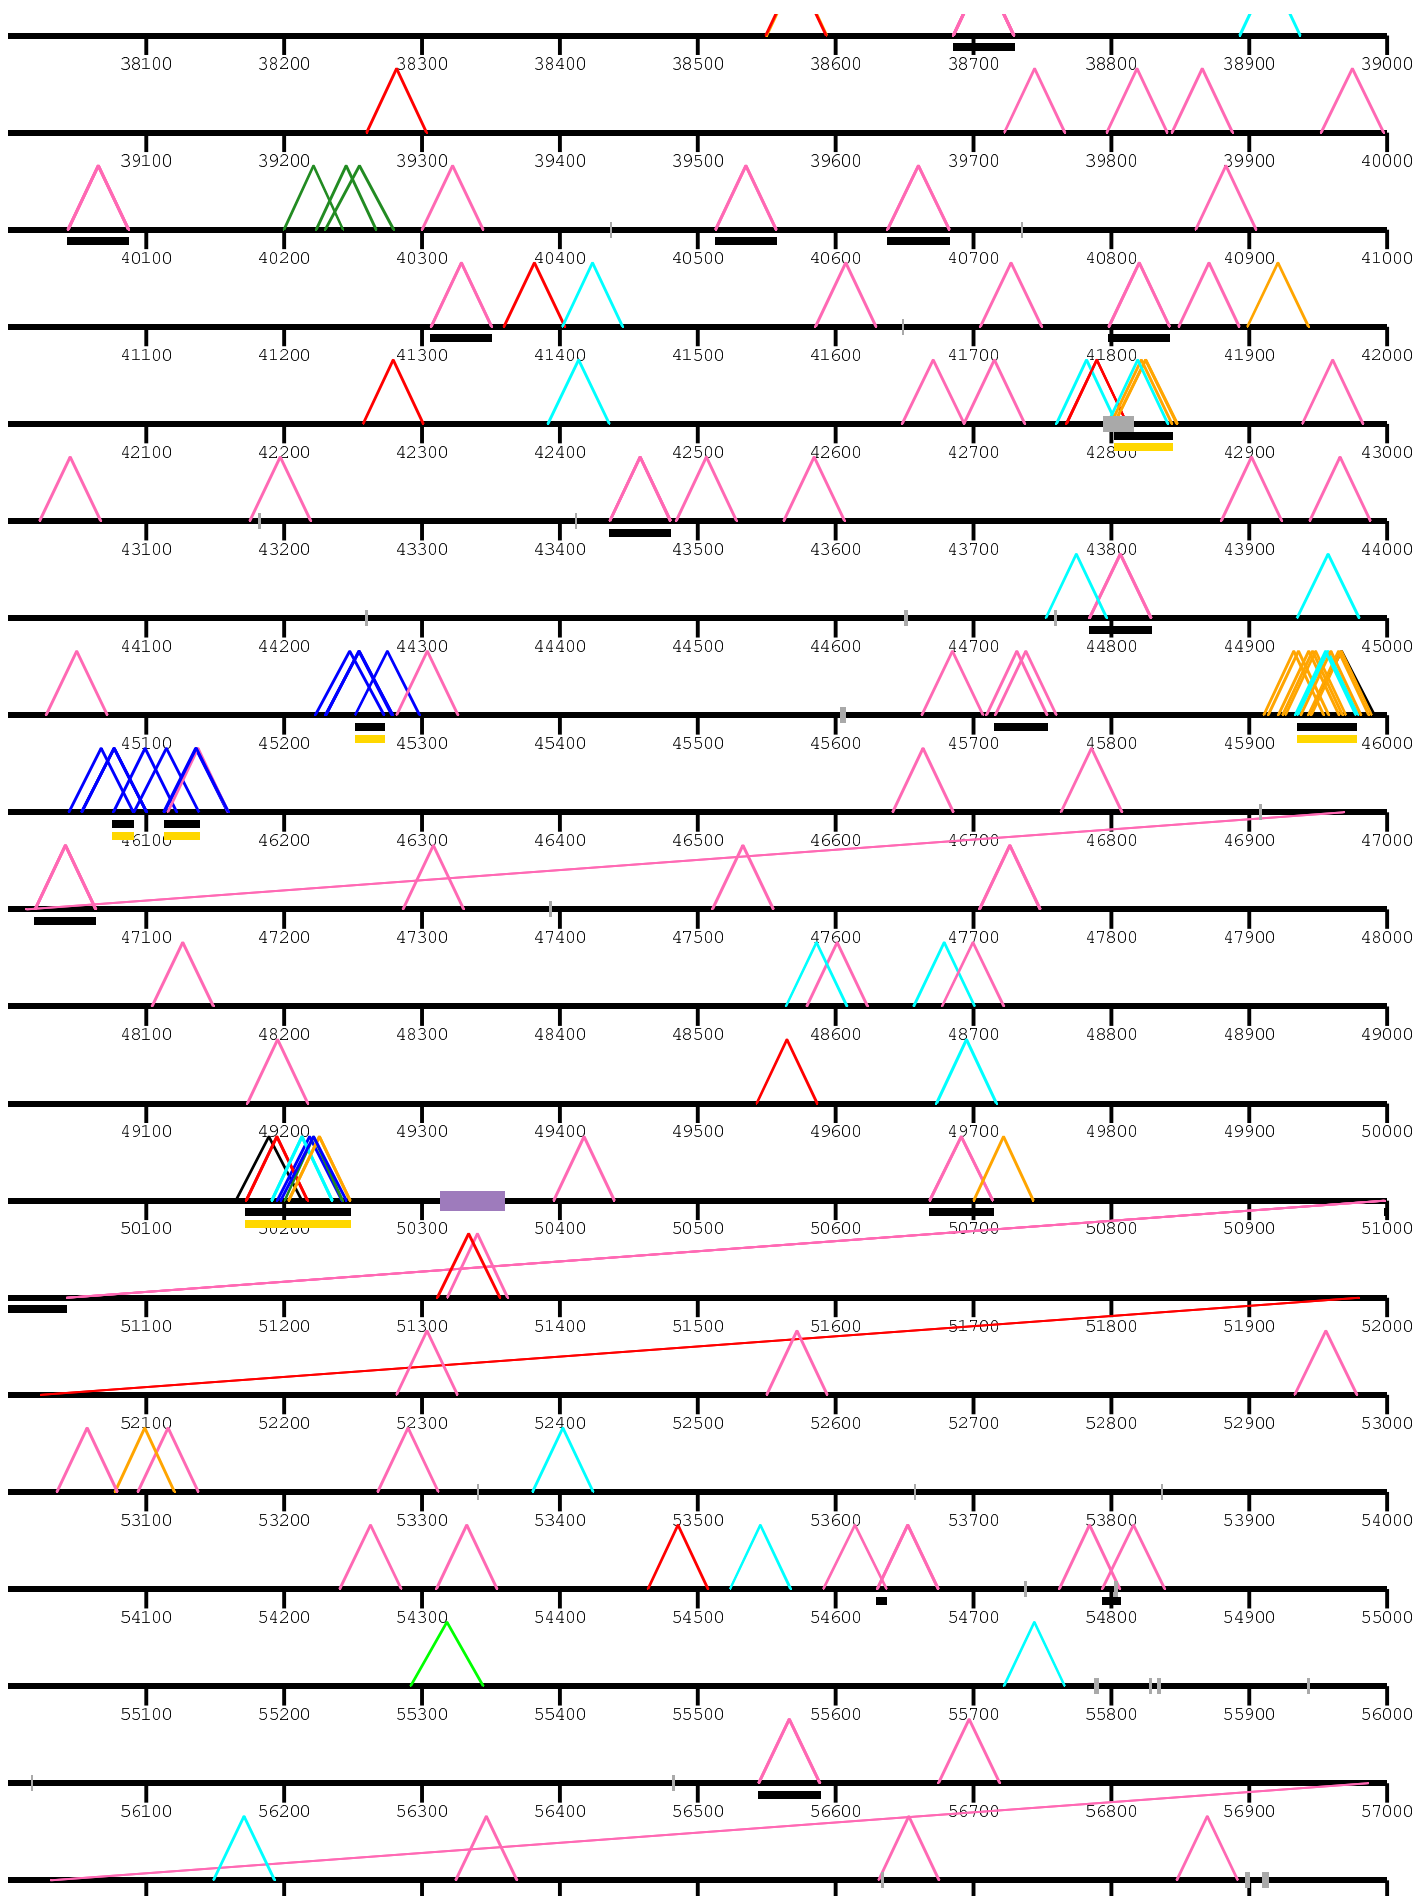

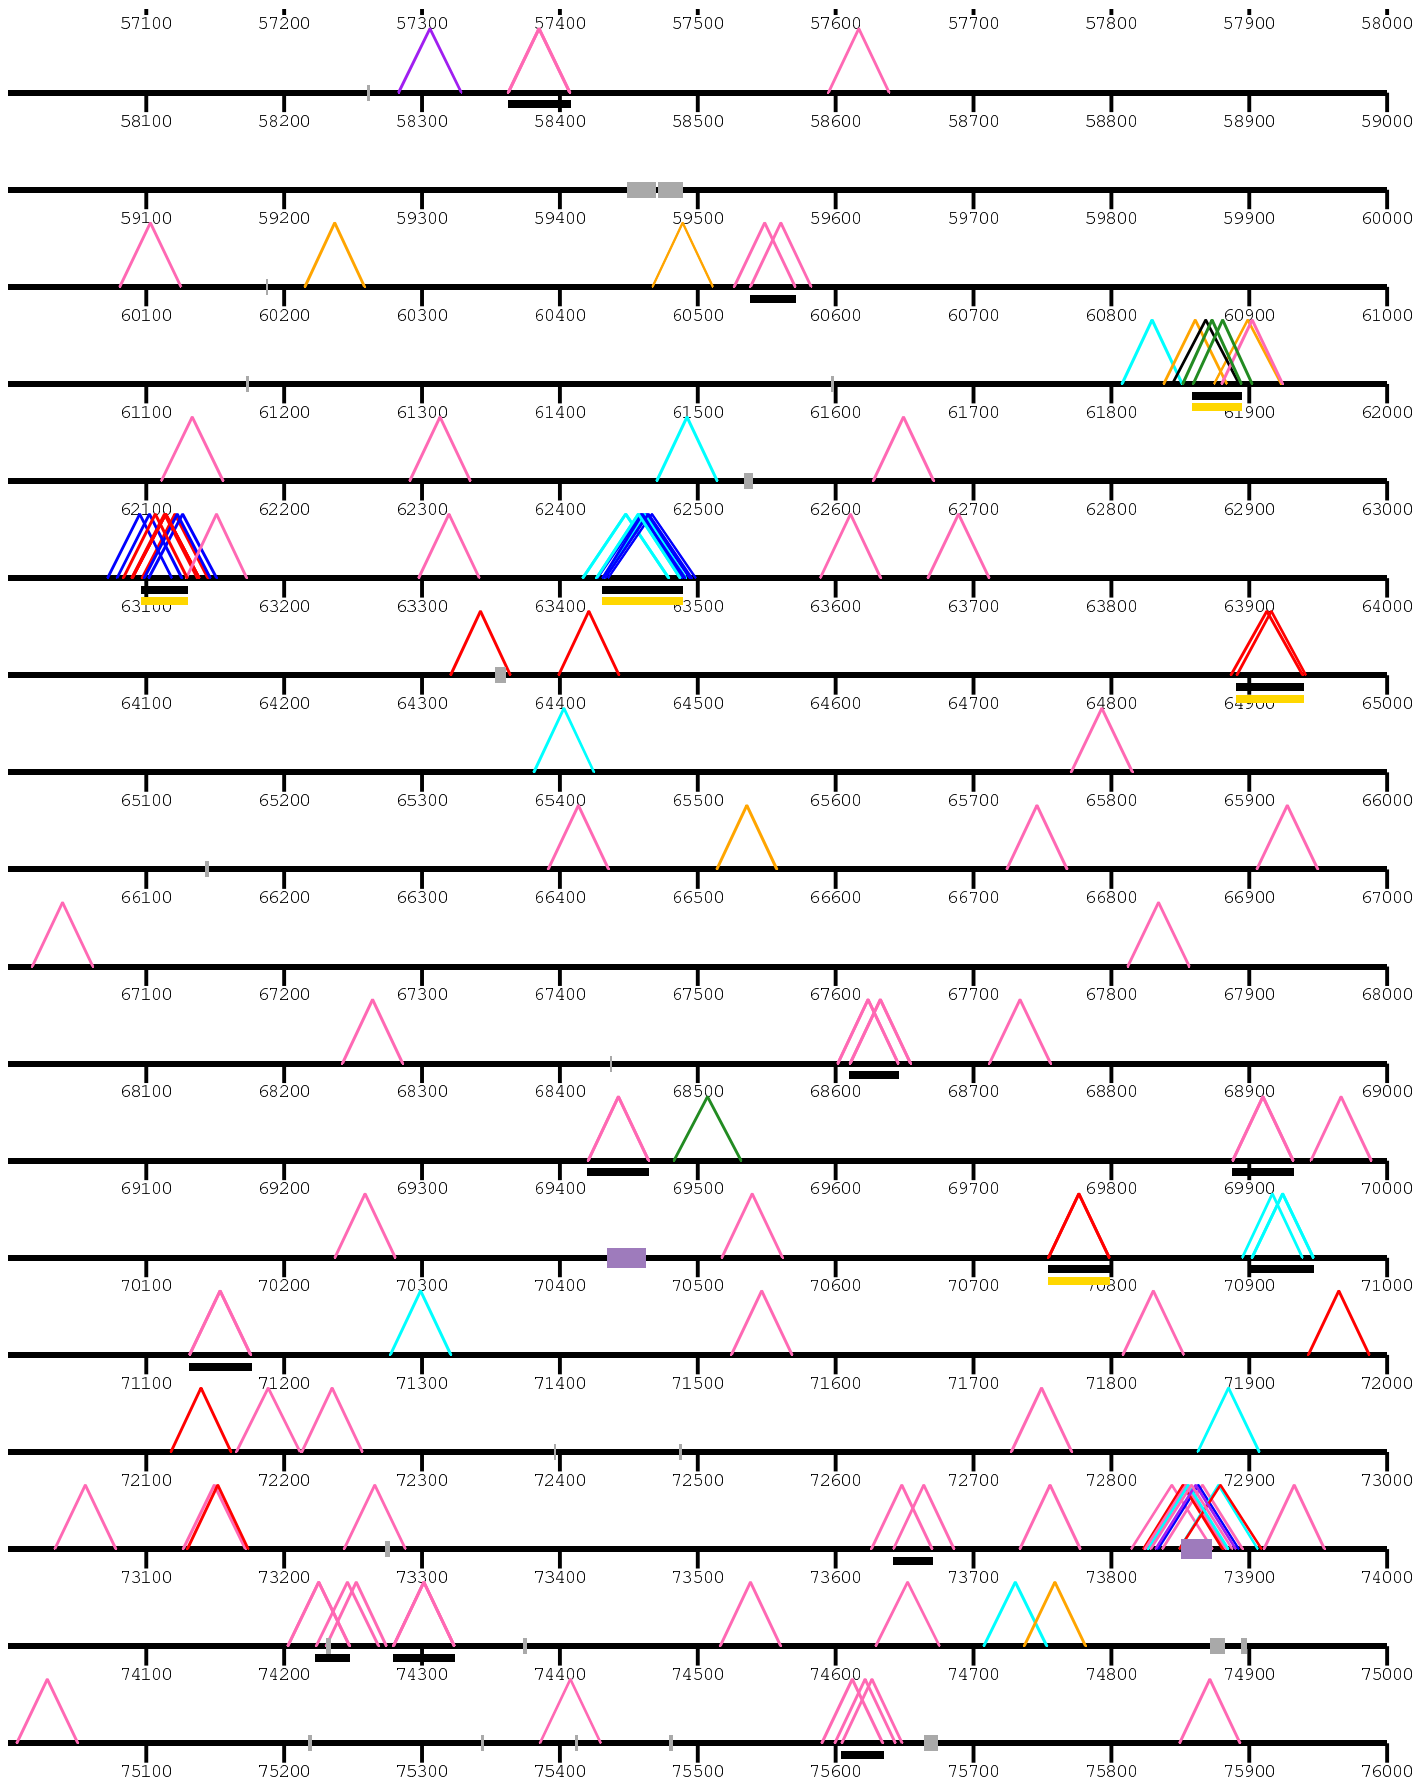

7610076117

chr19

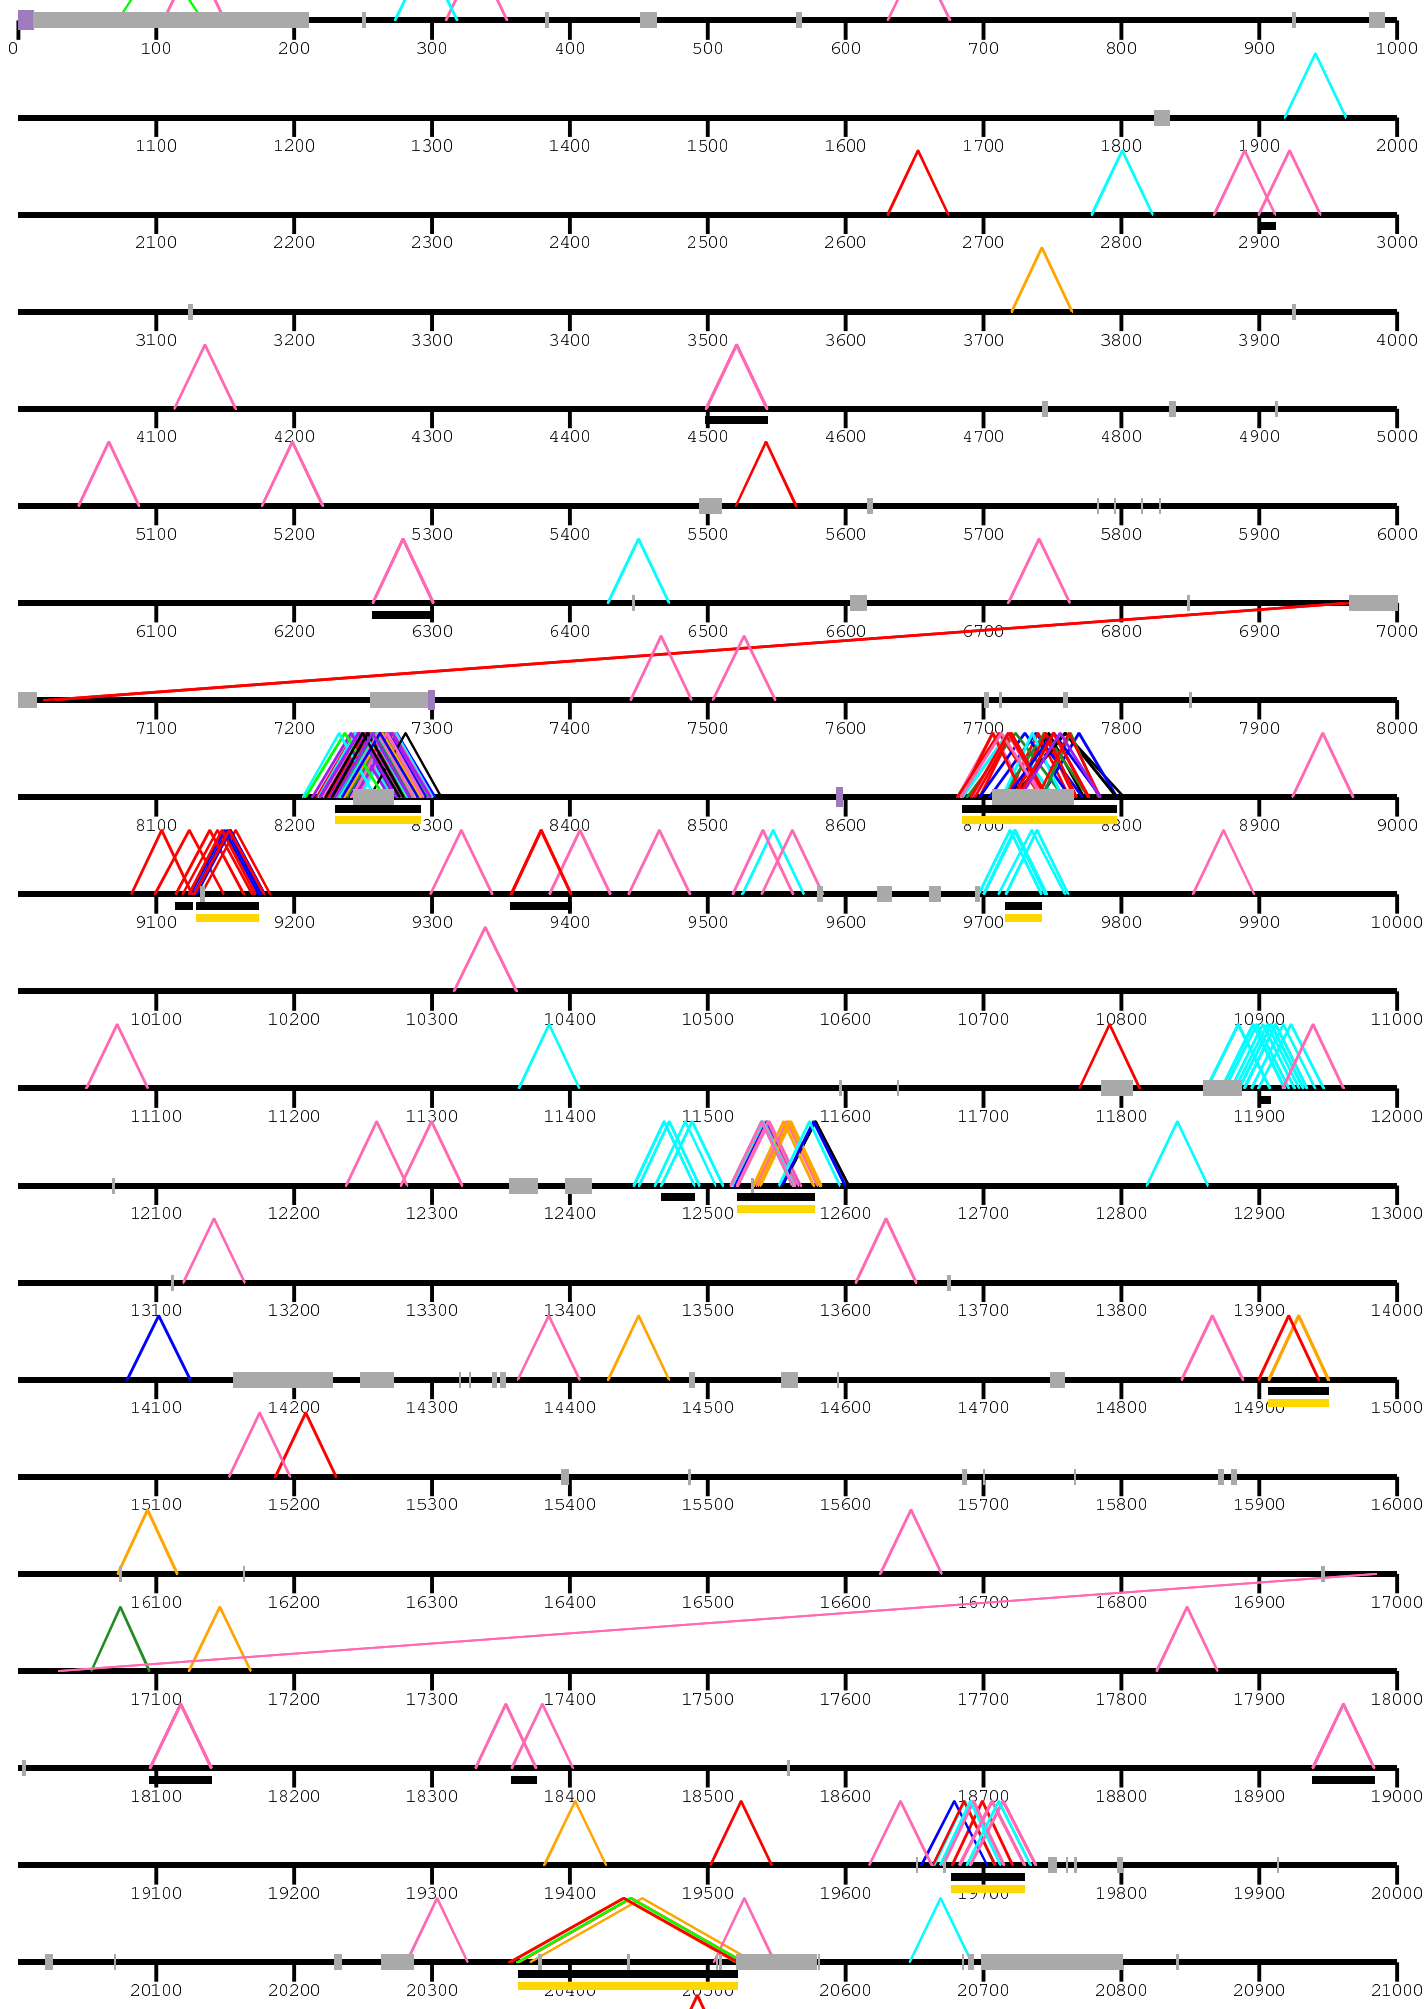

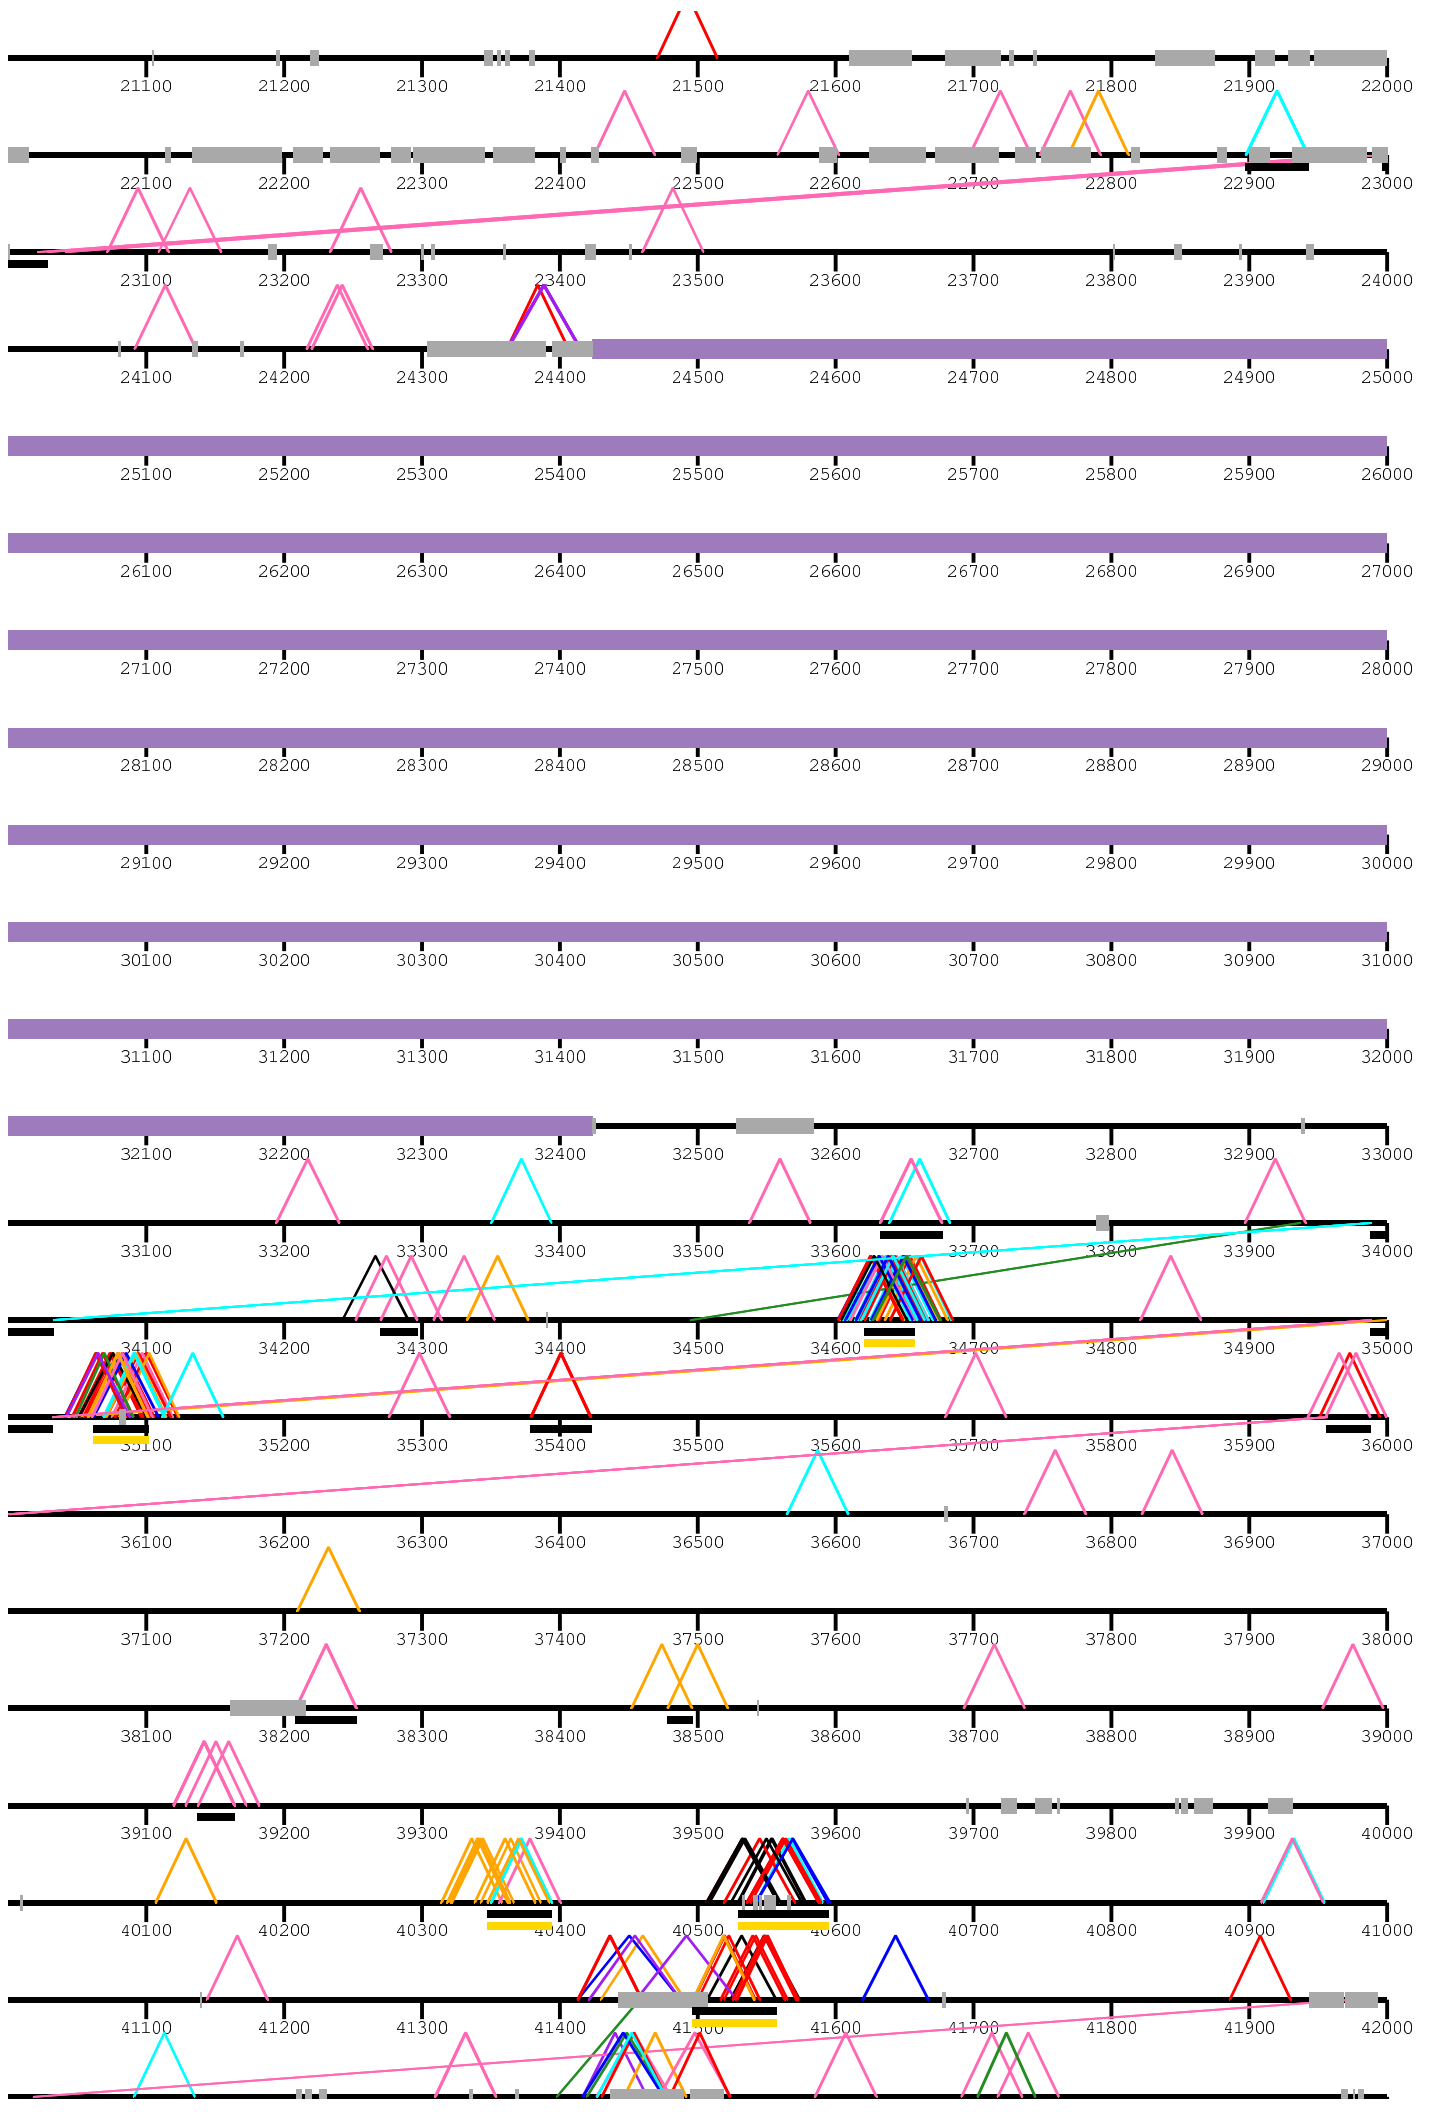

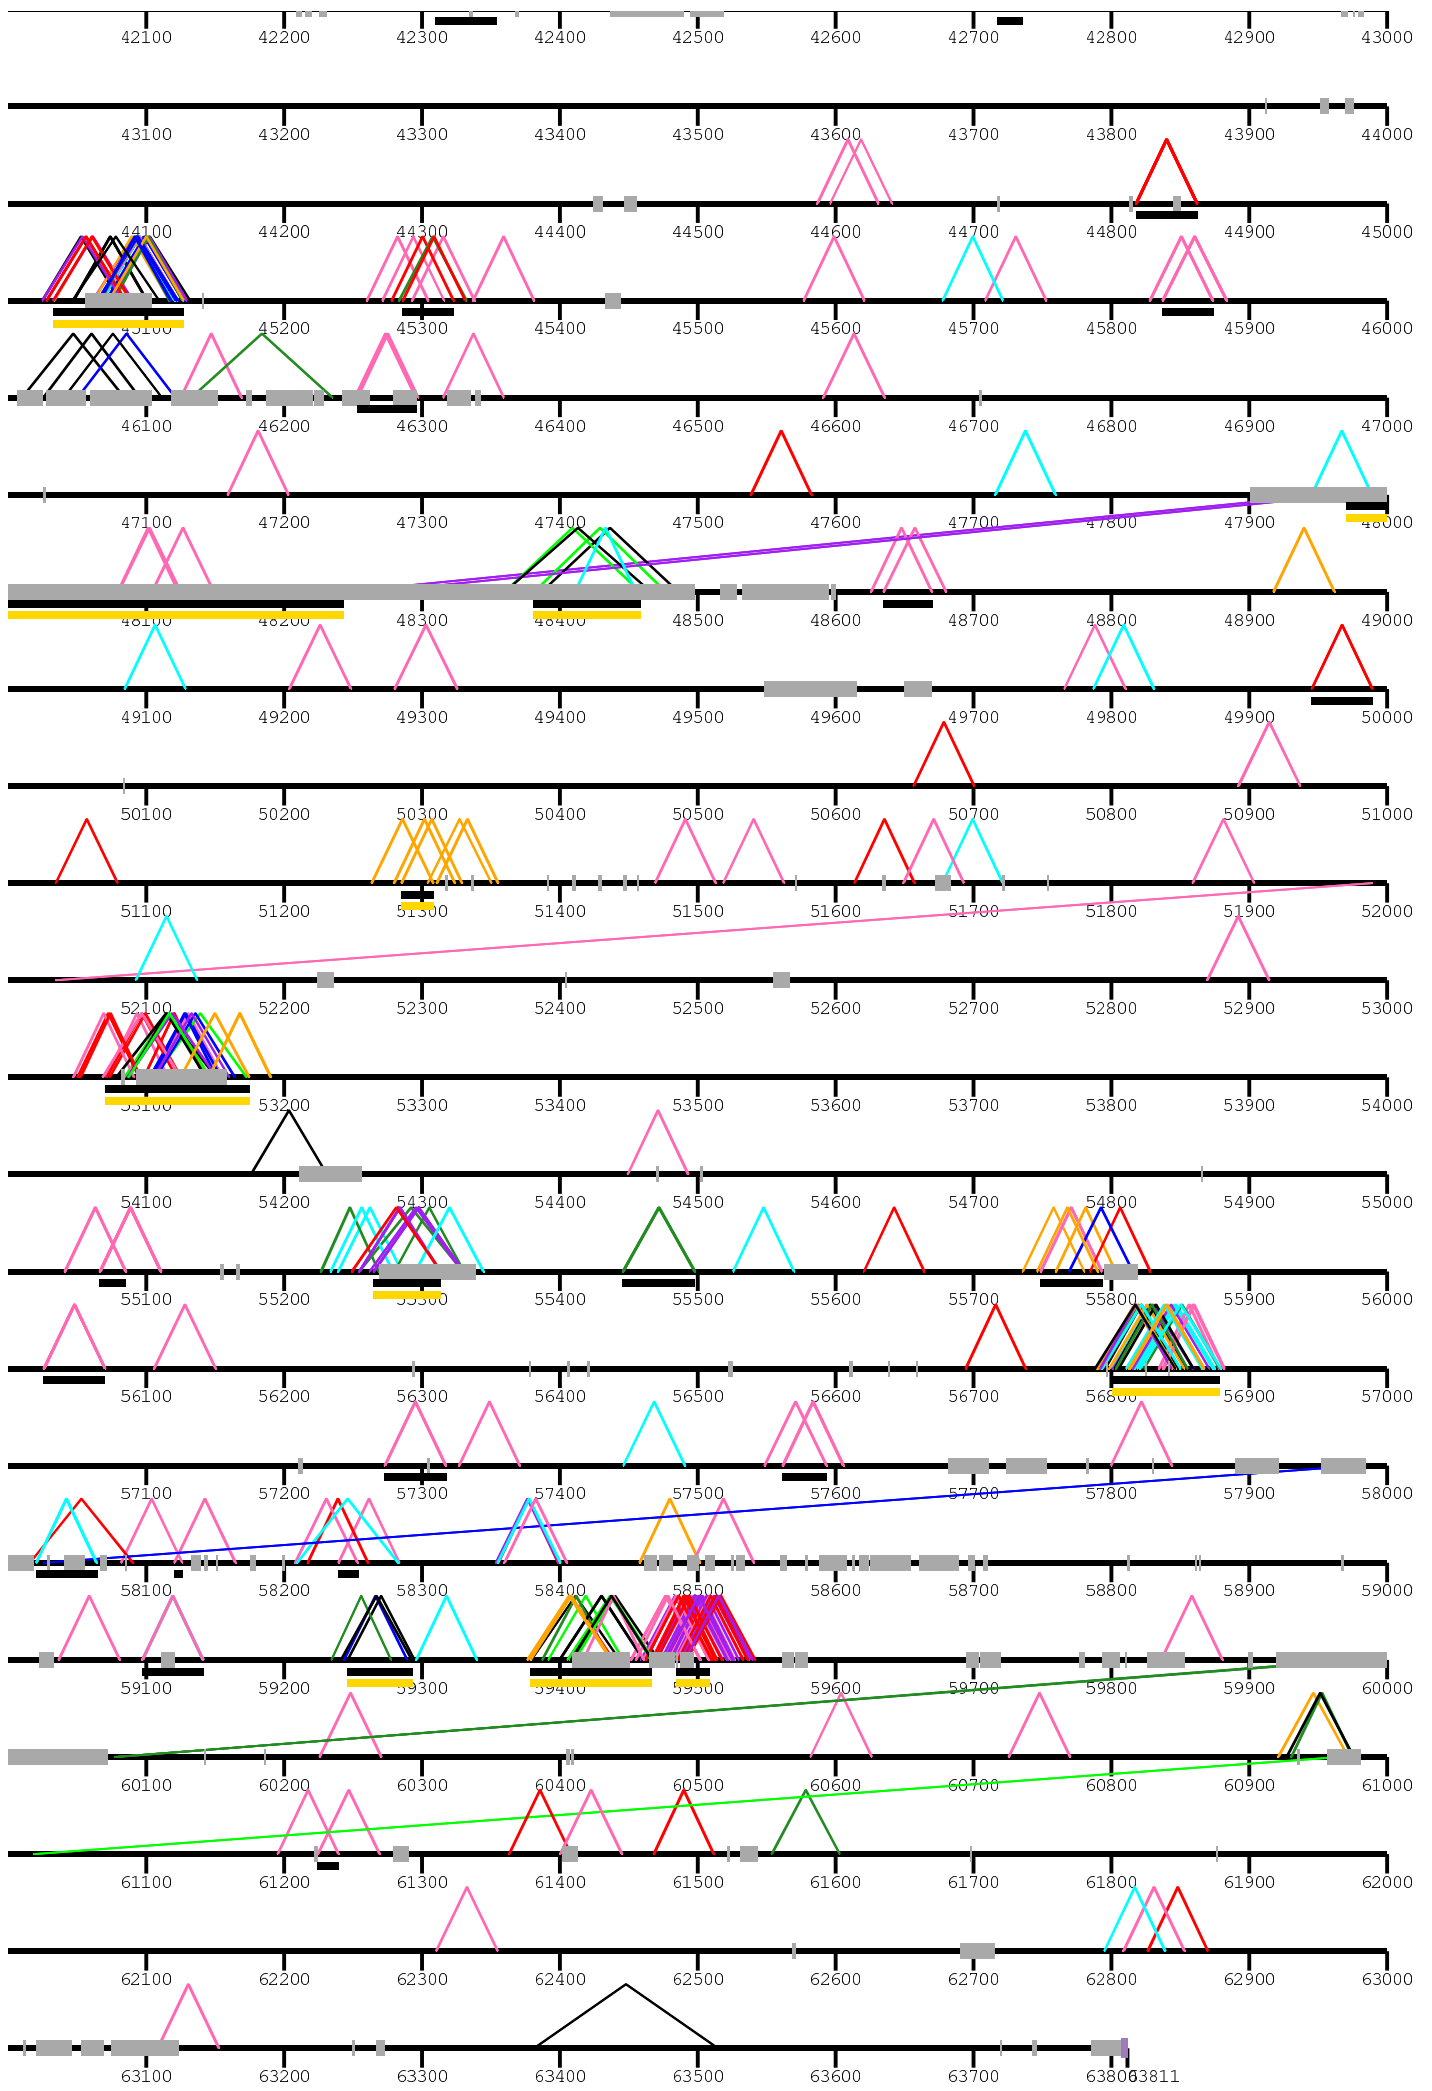

chr20

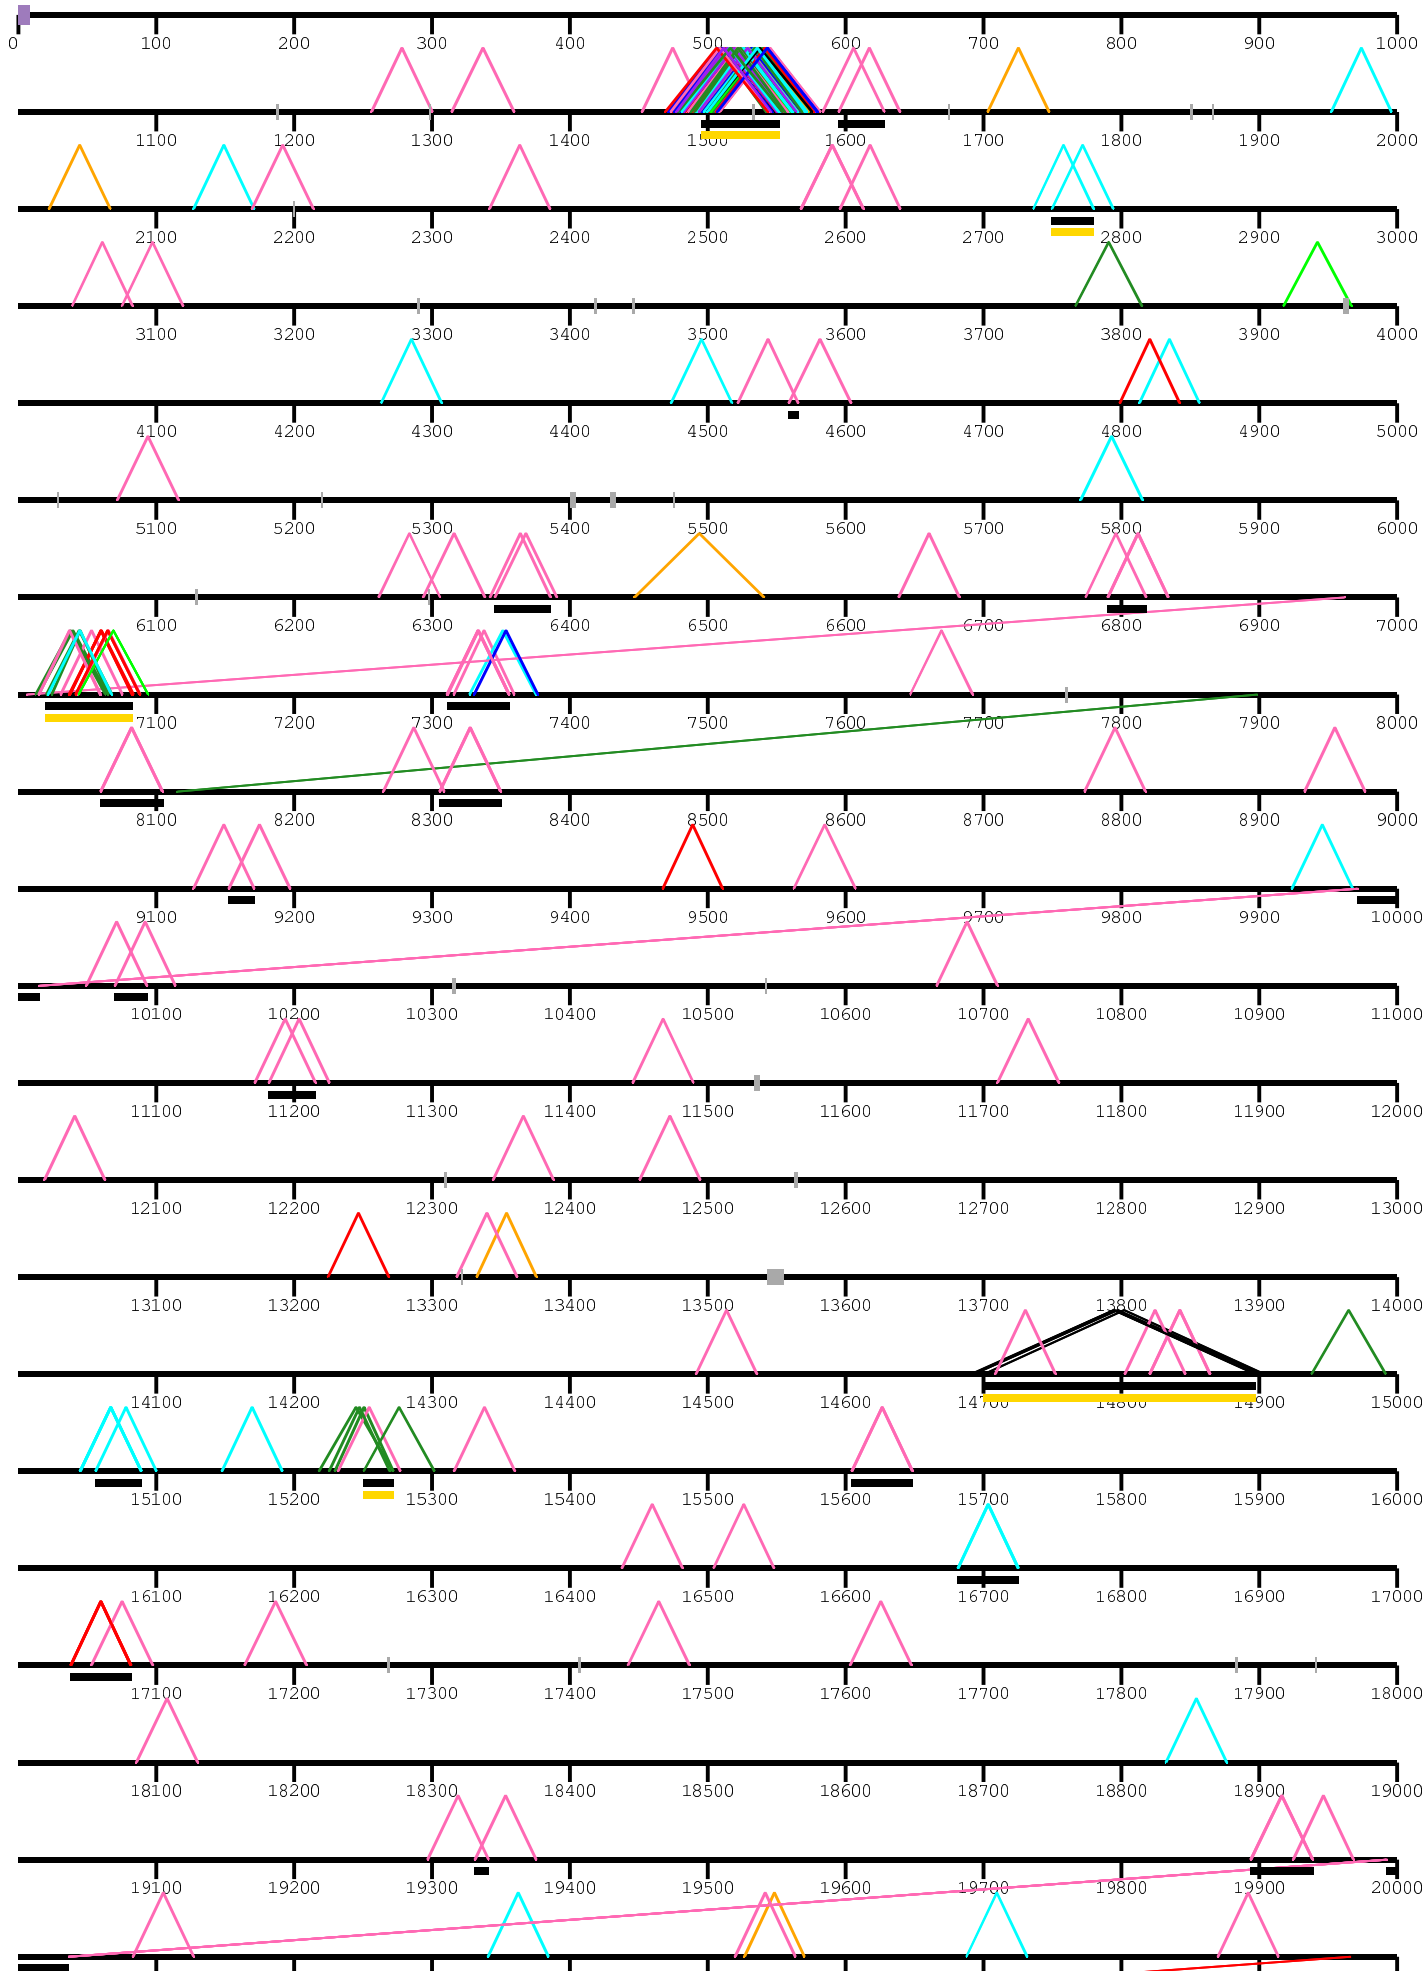



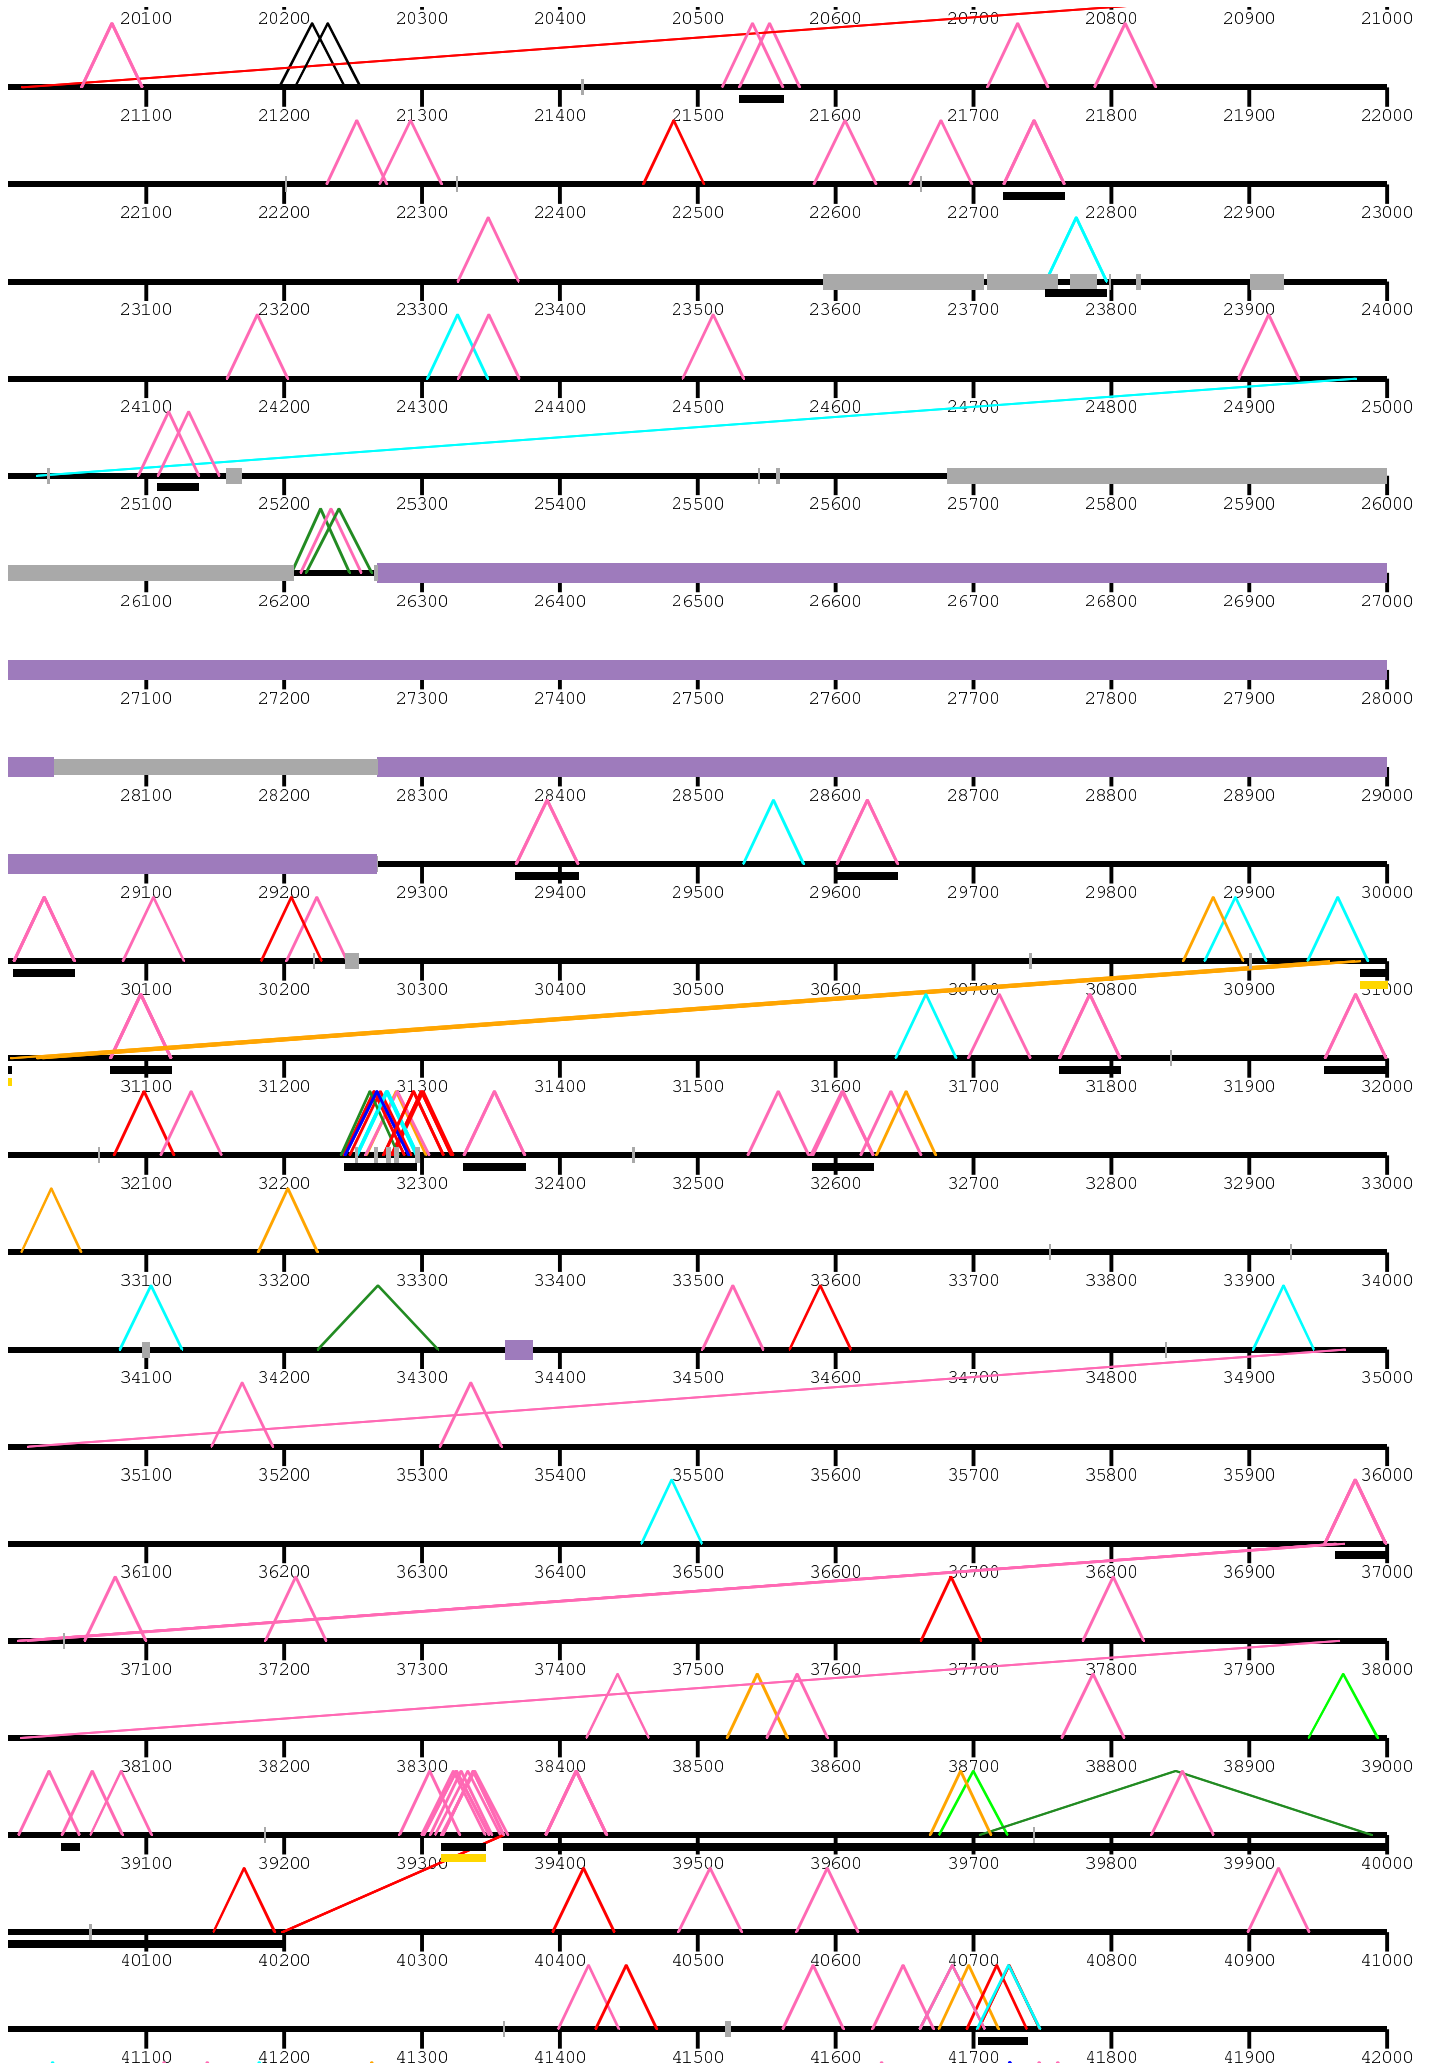

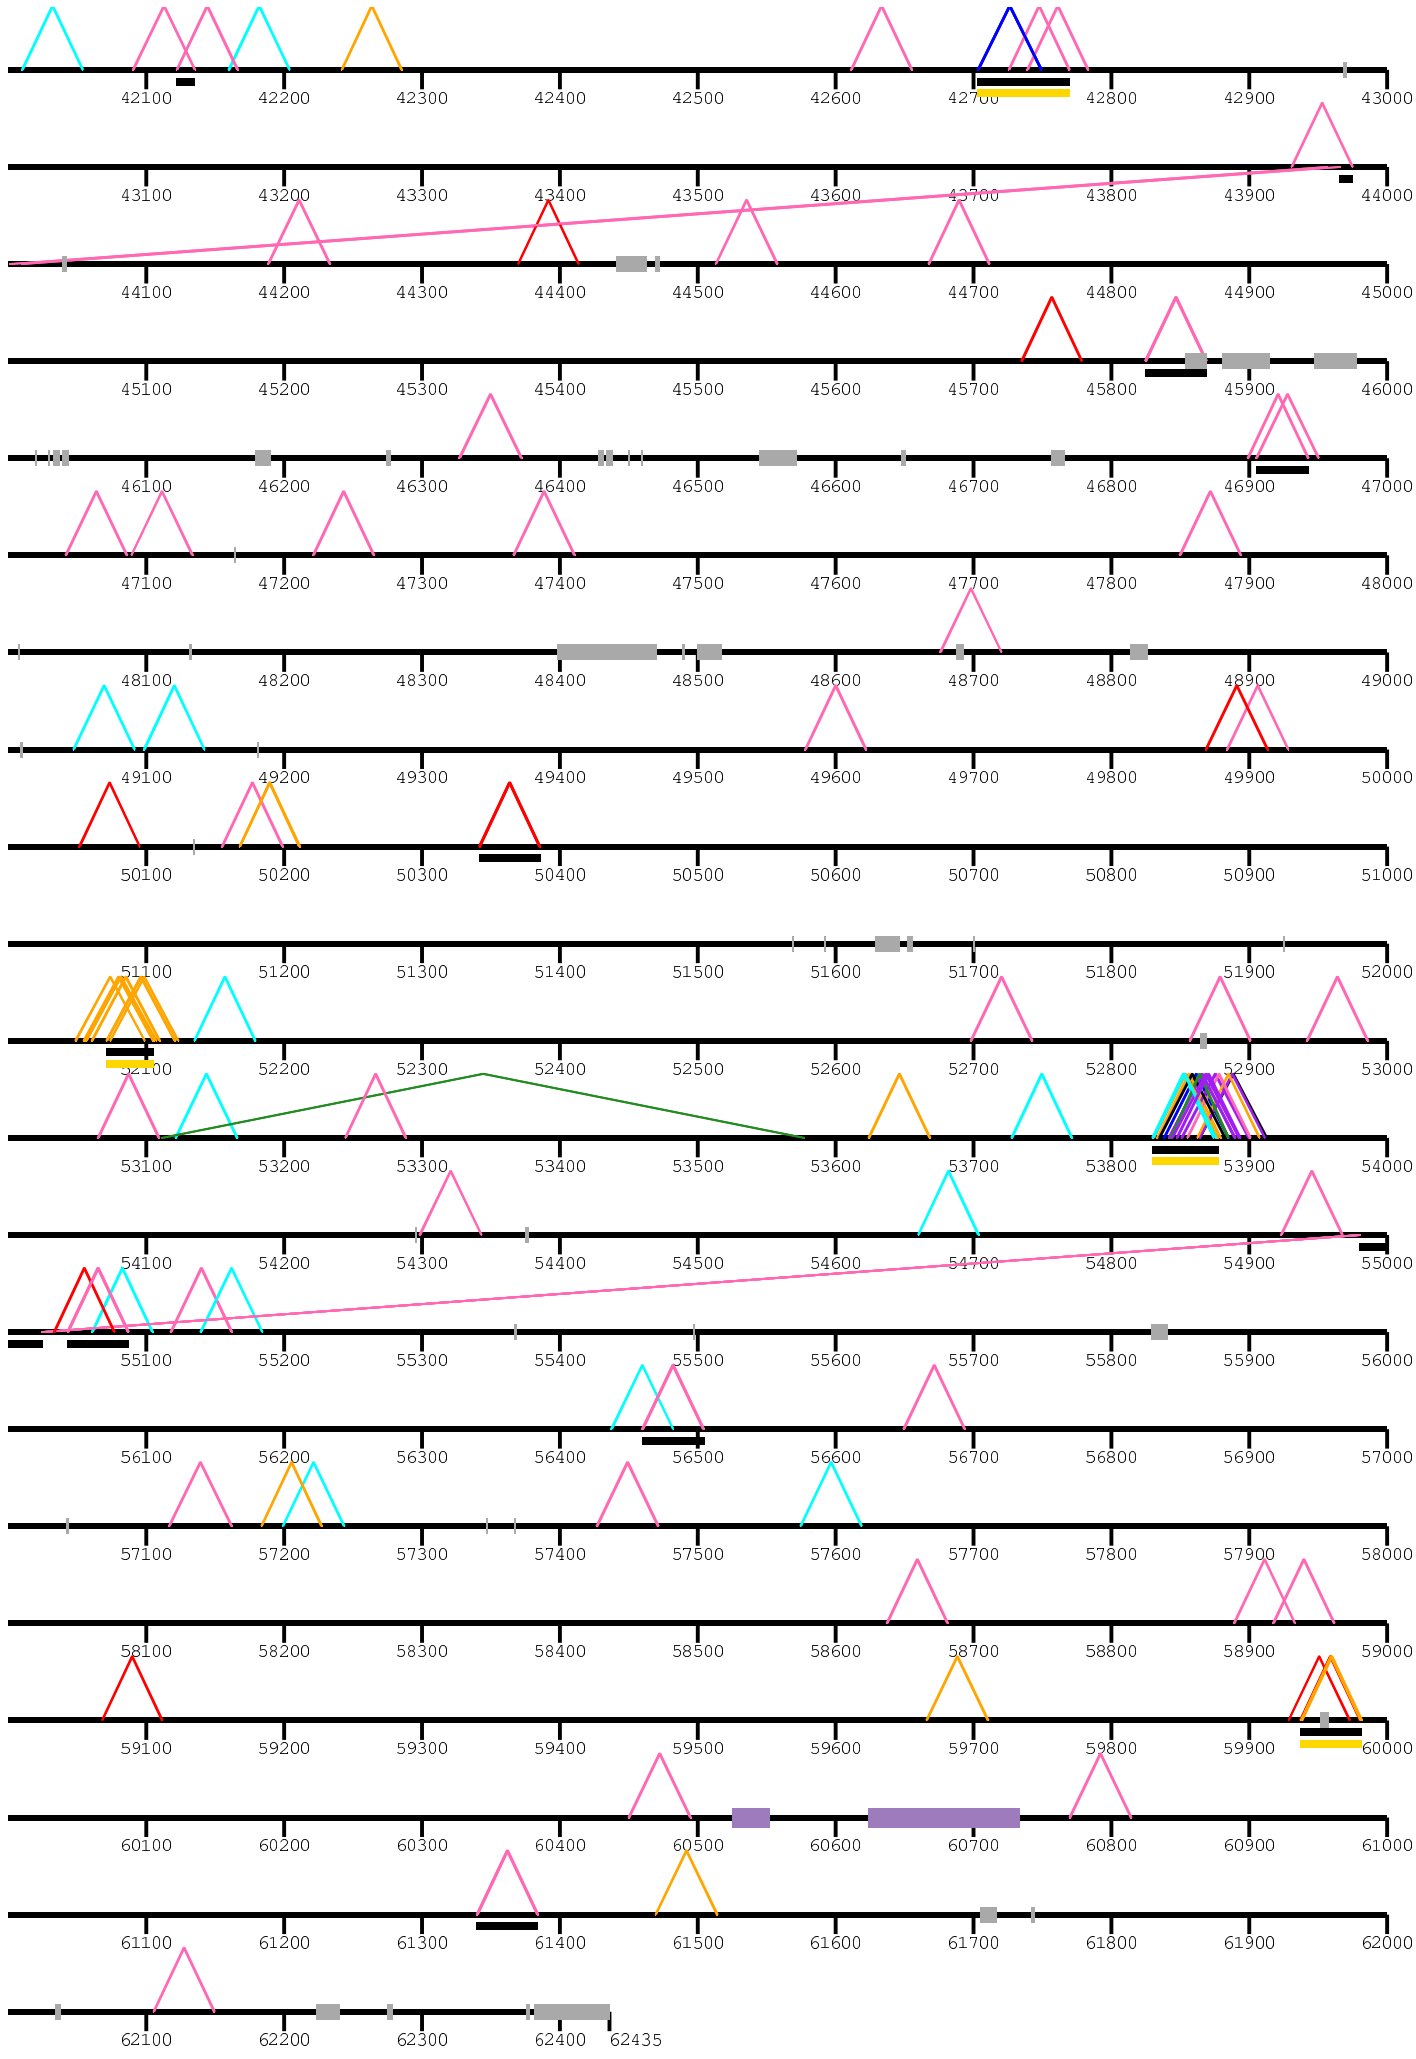

chr21

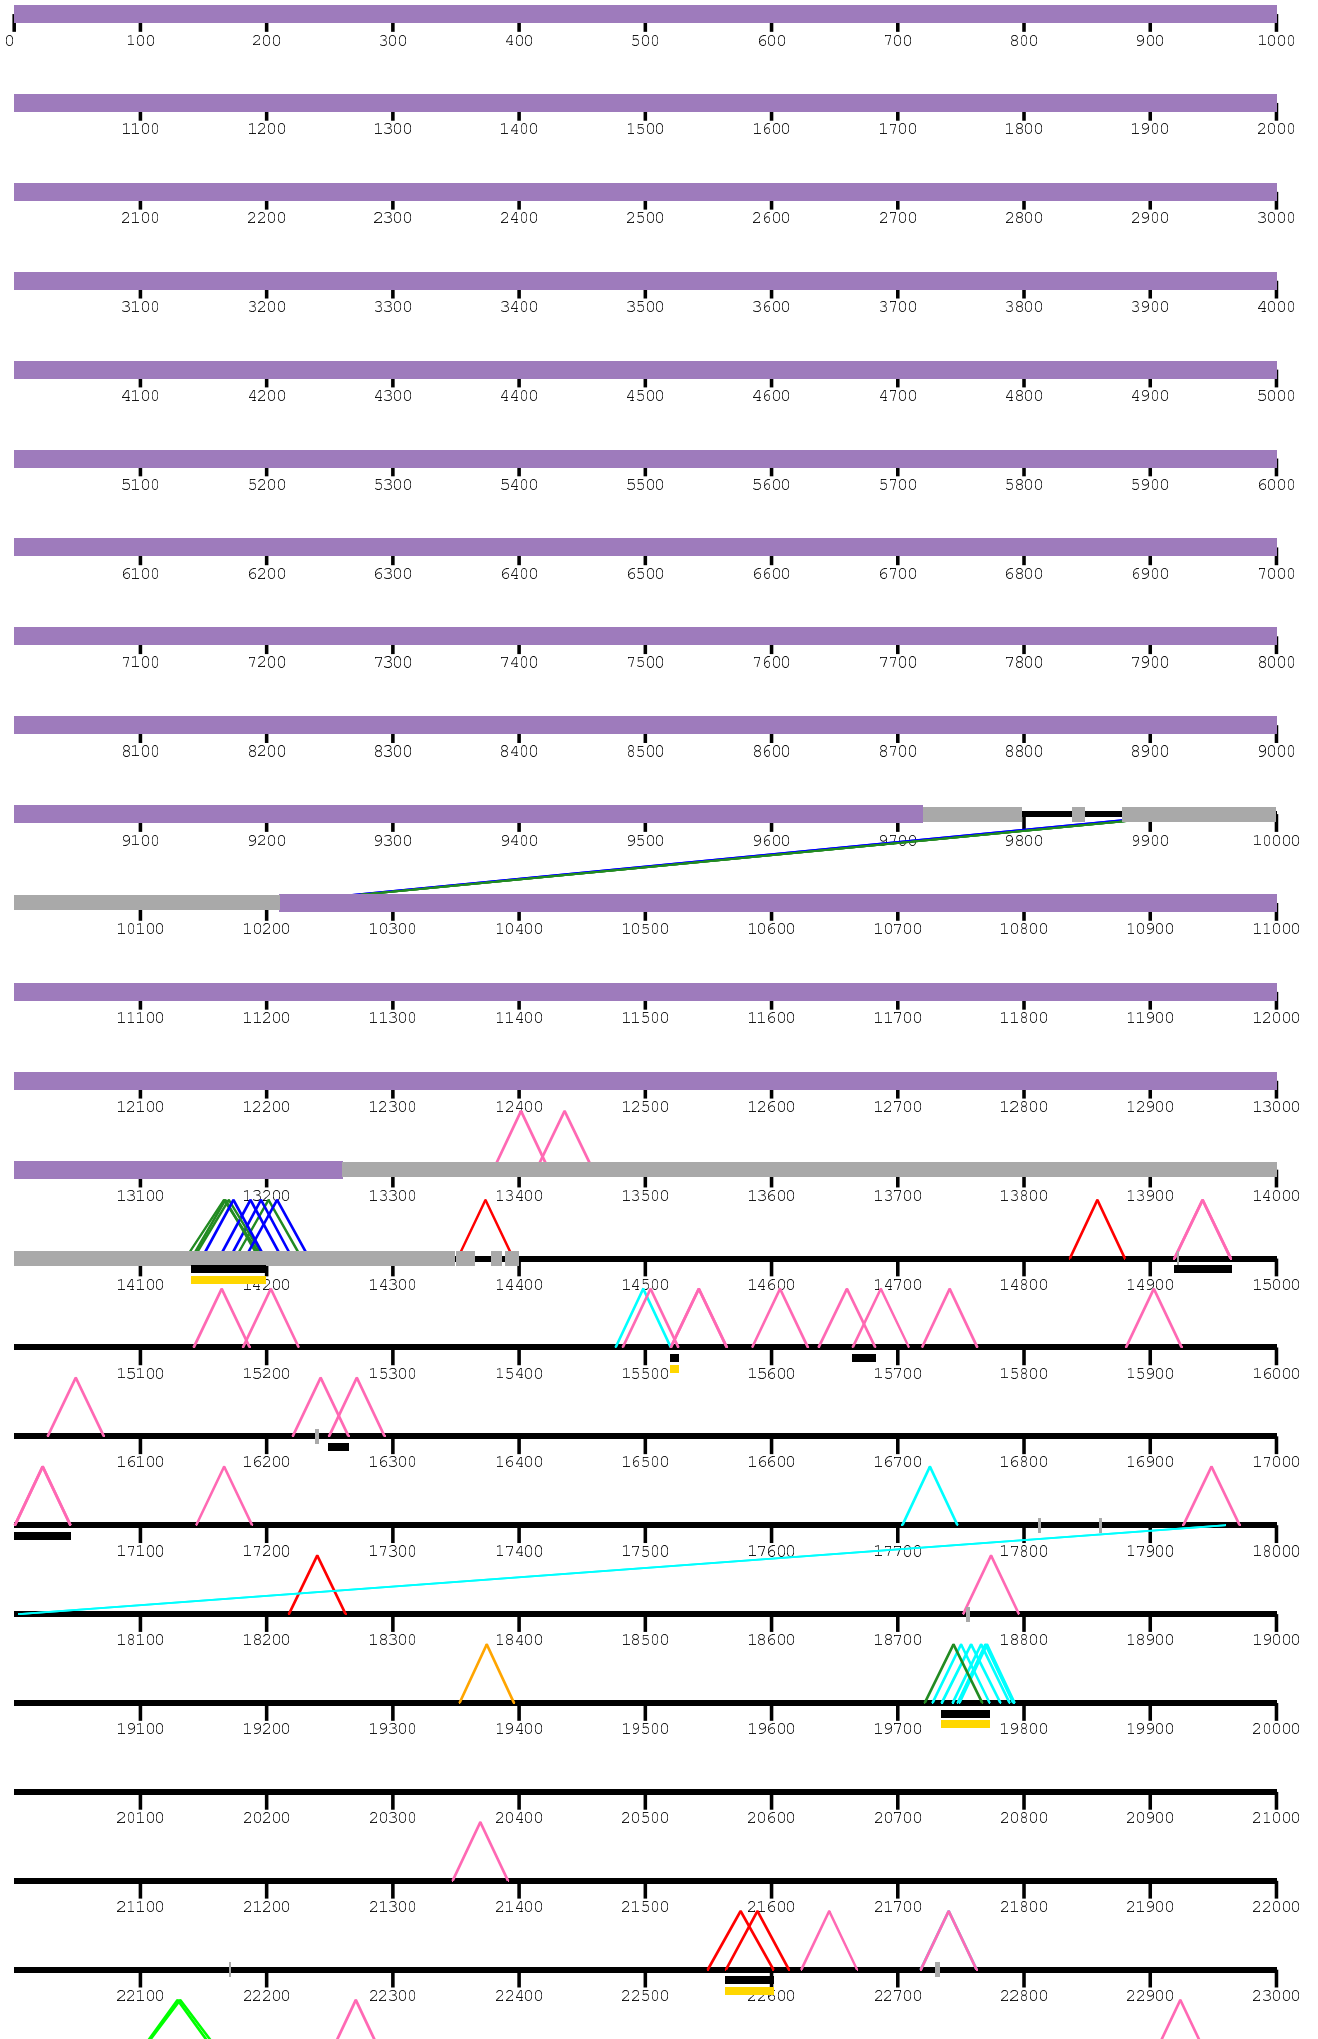

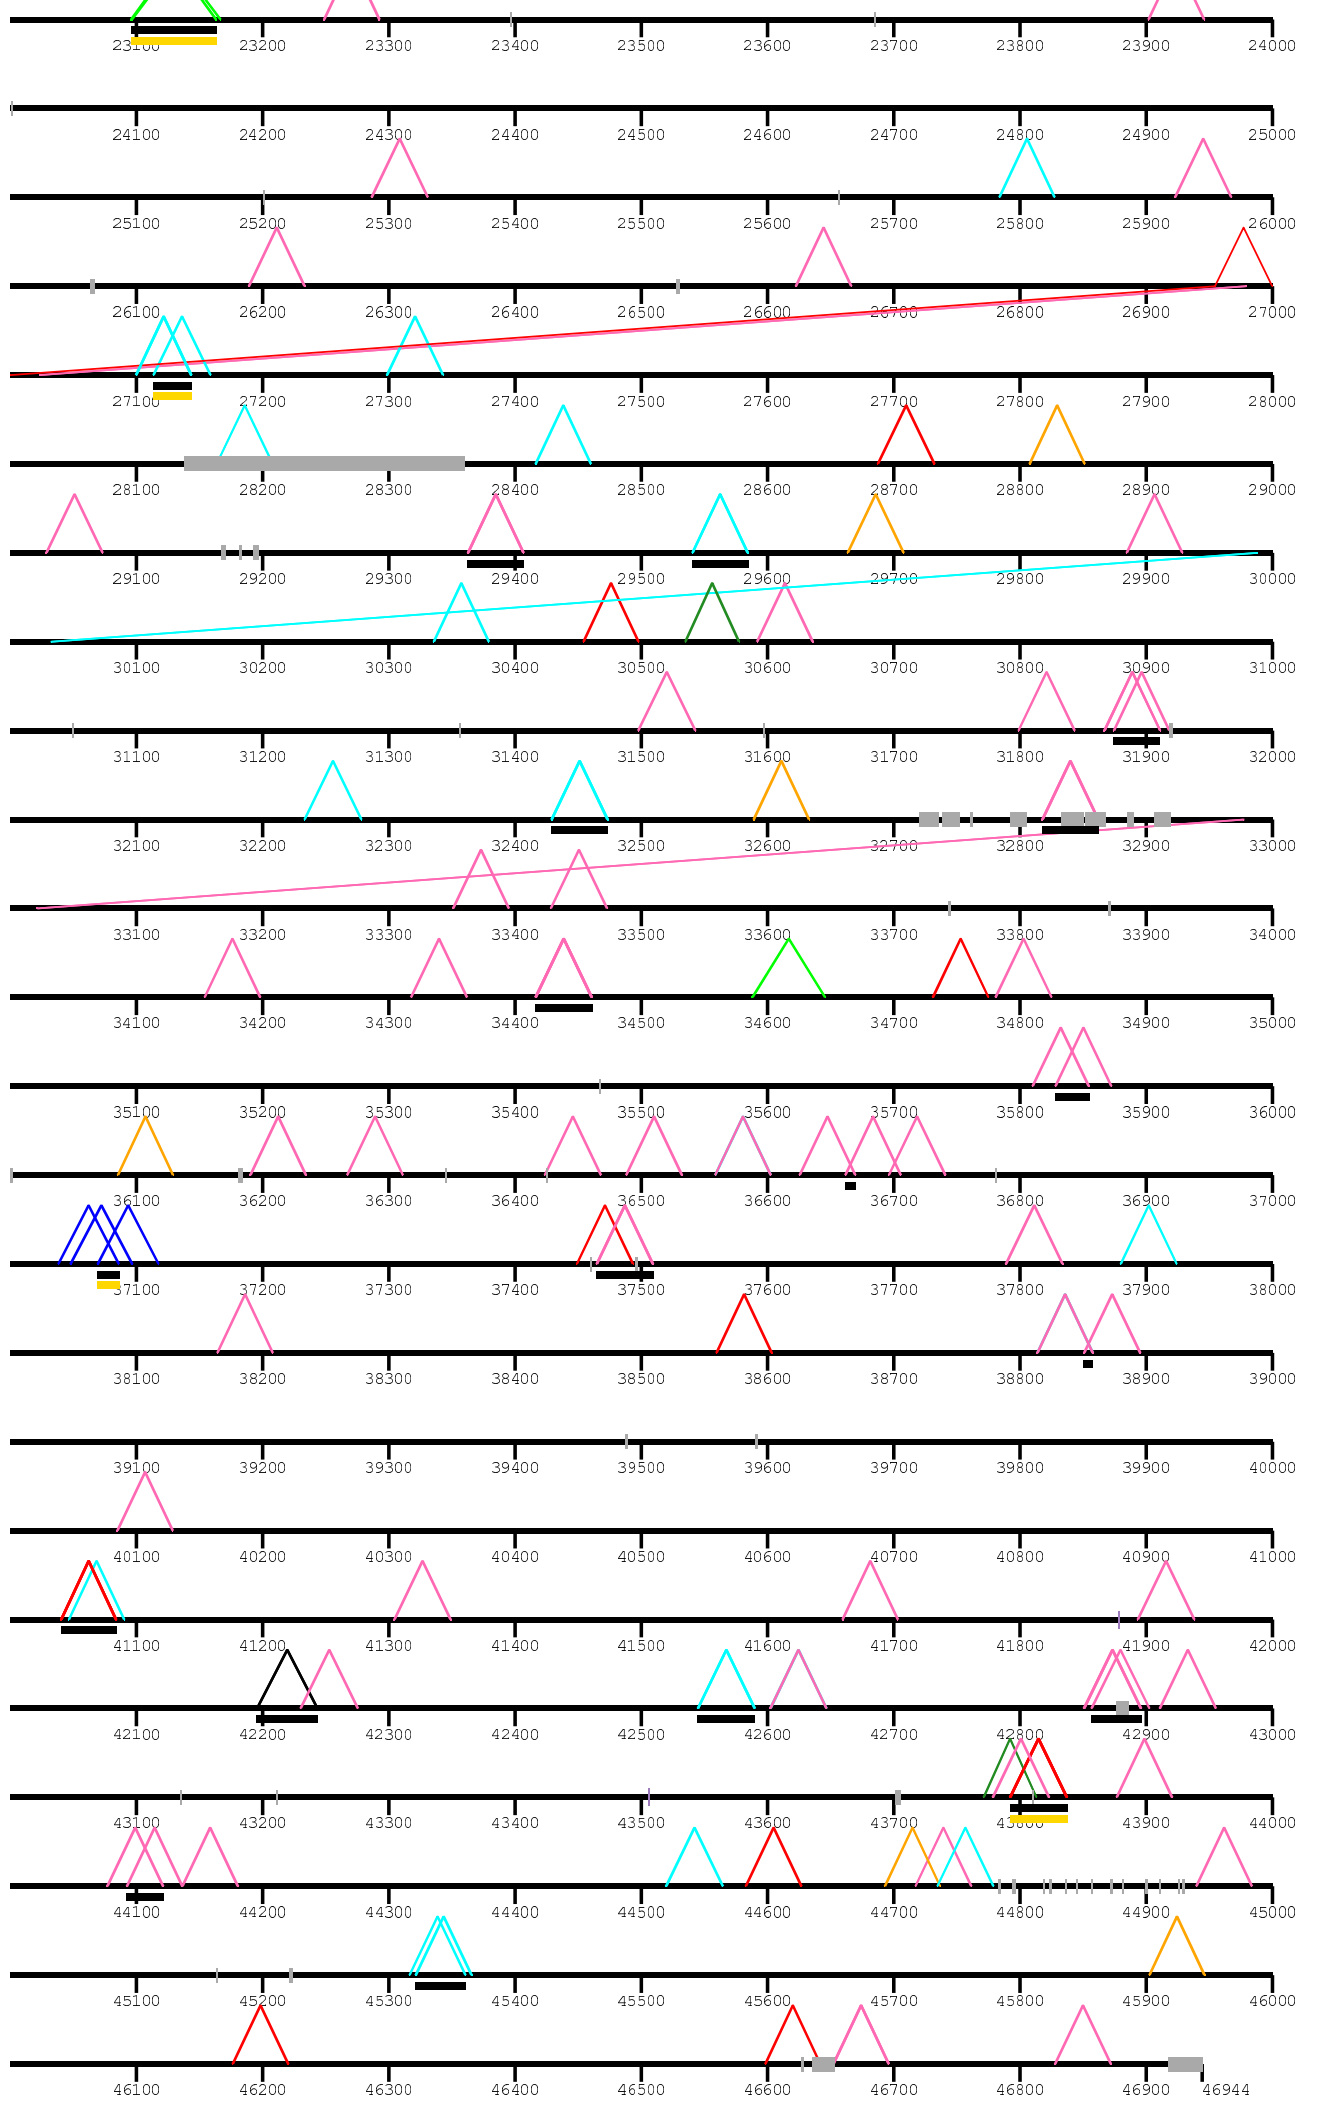

chr22

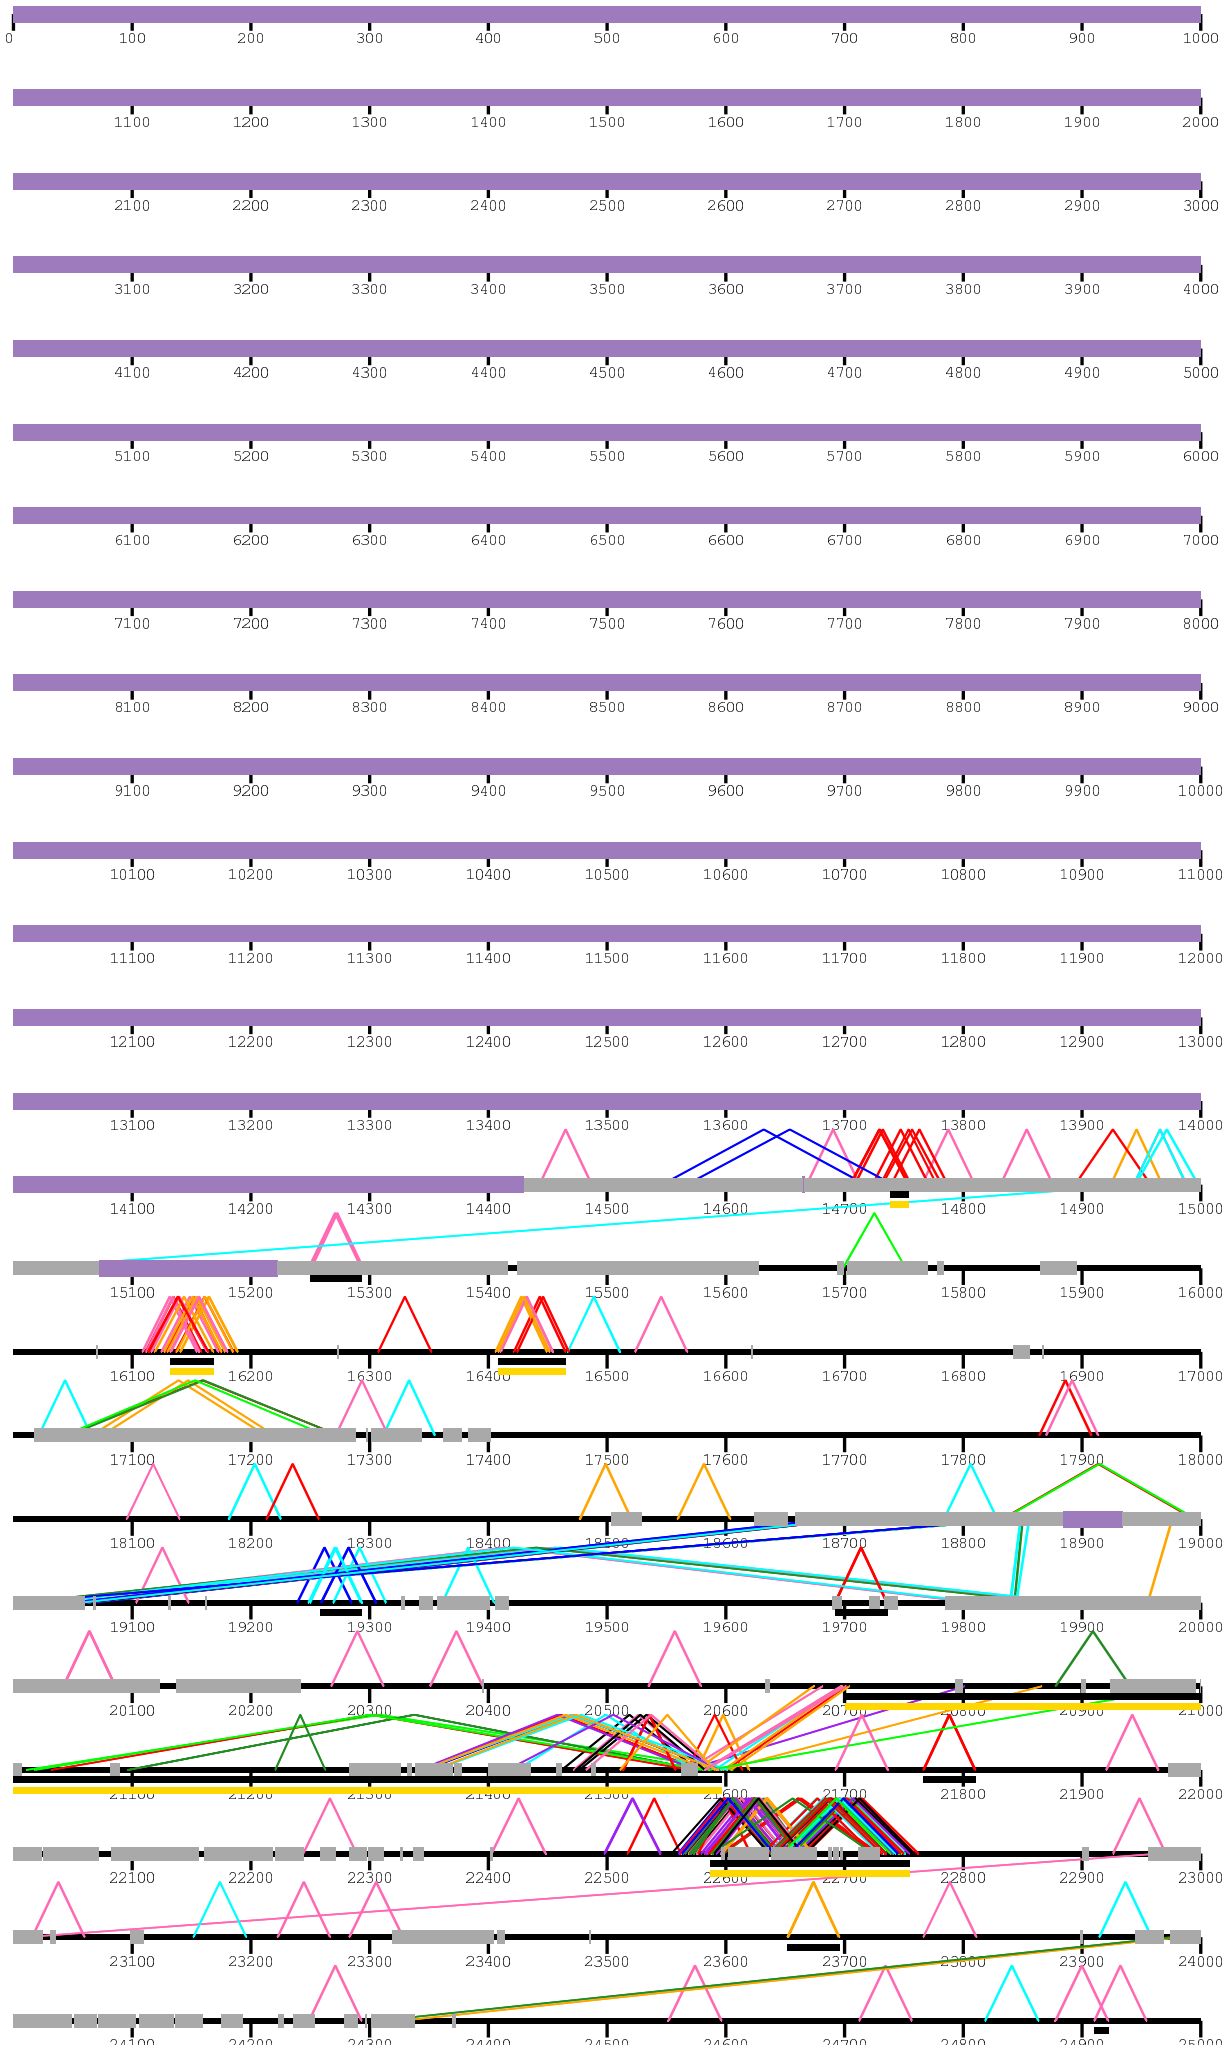

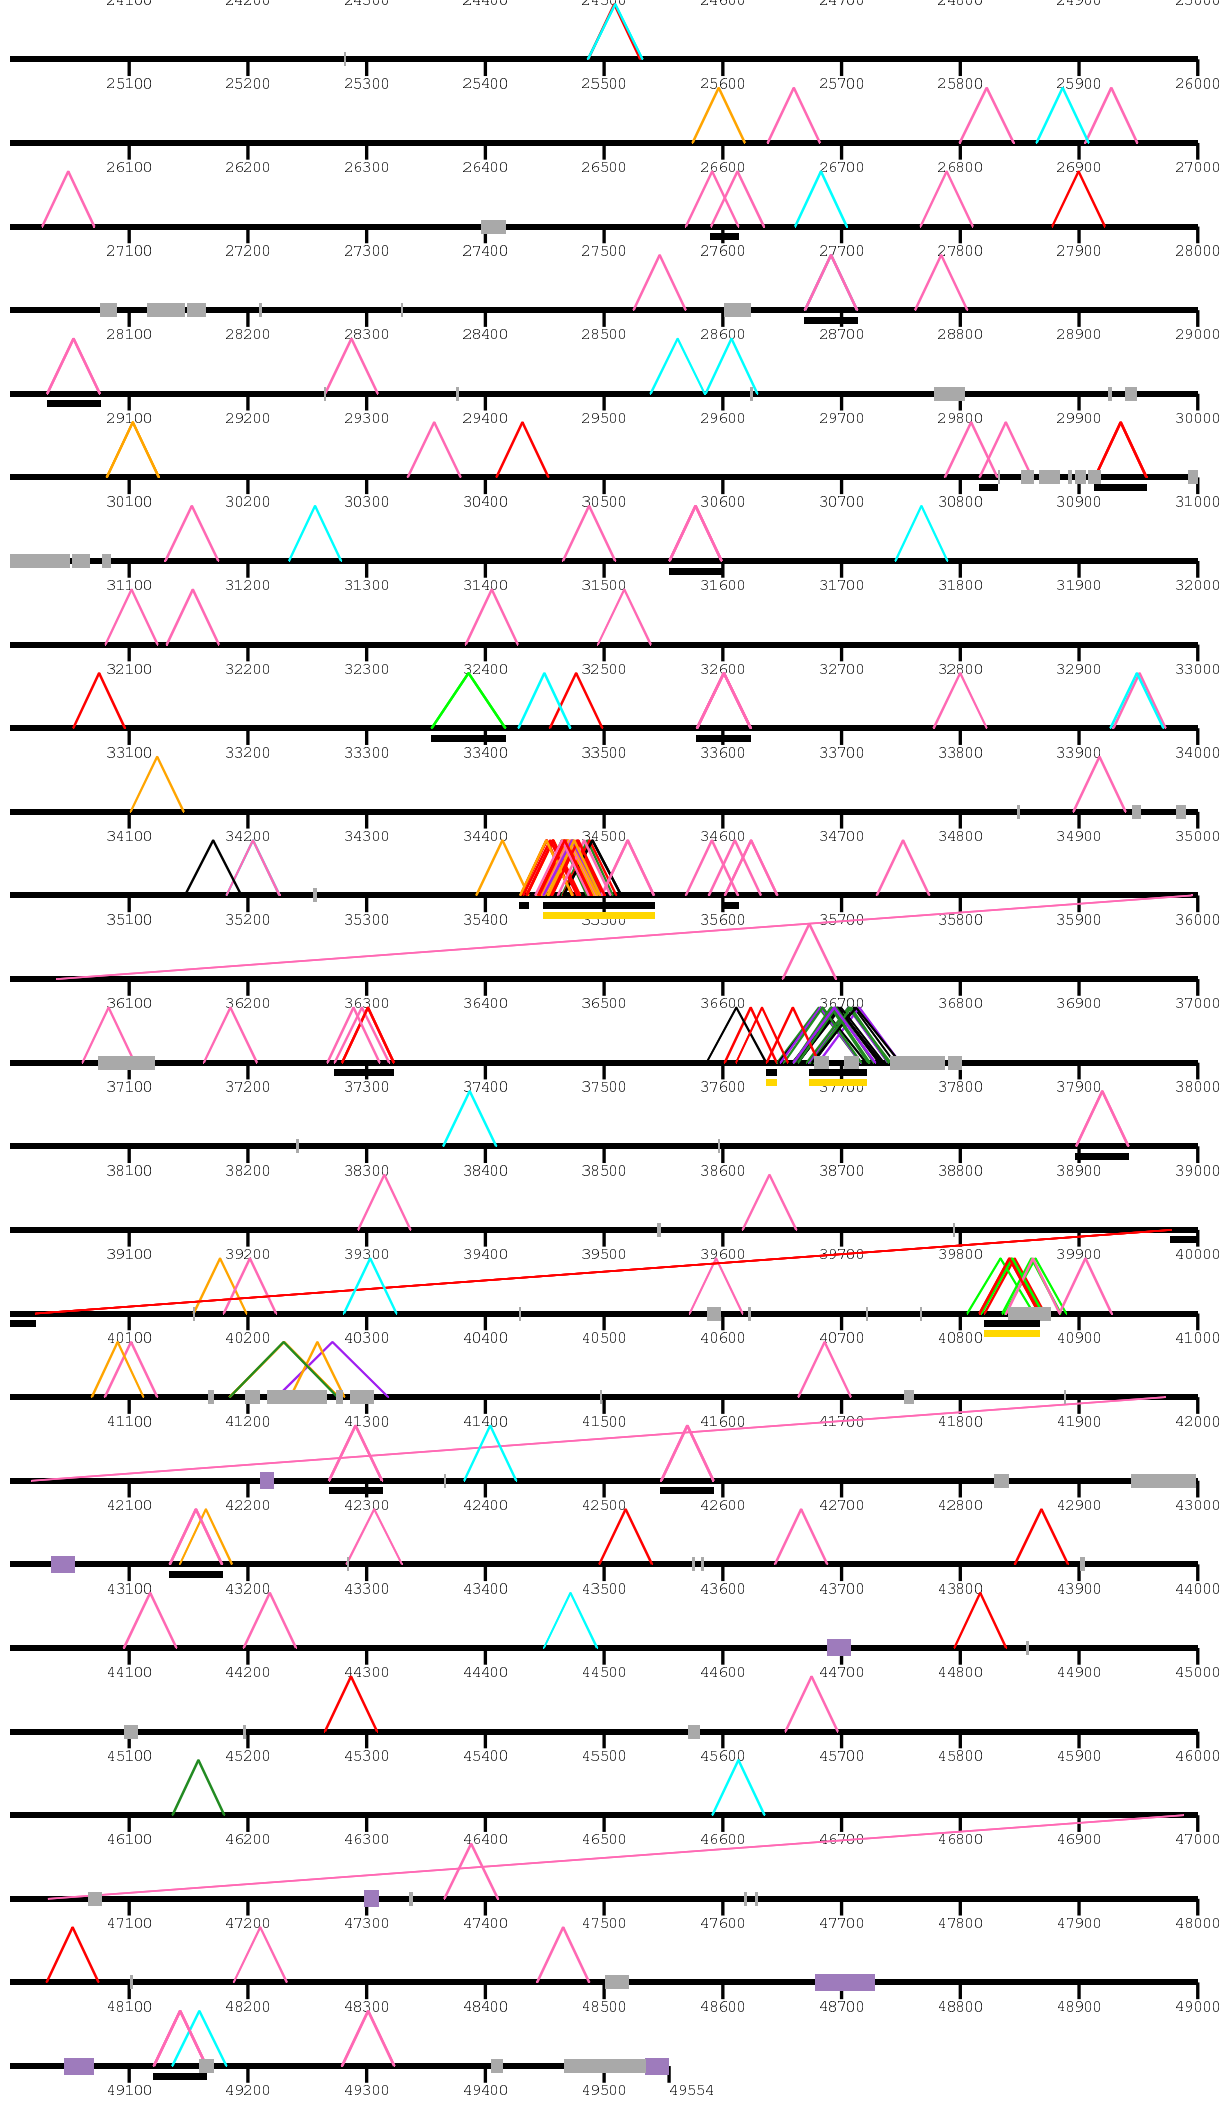

chrX

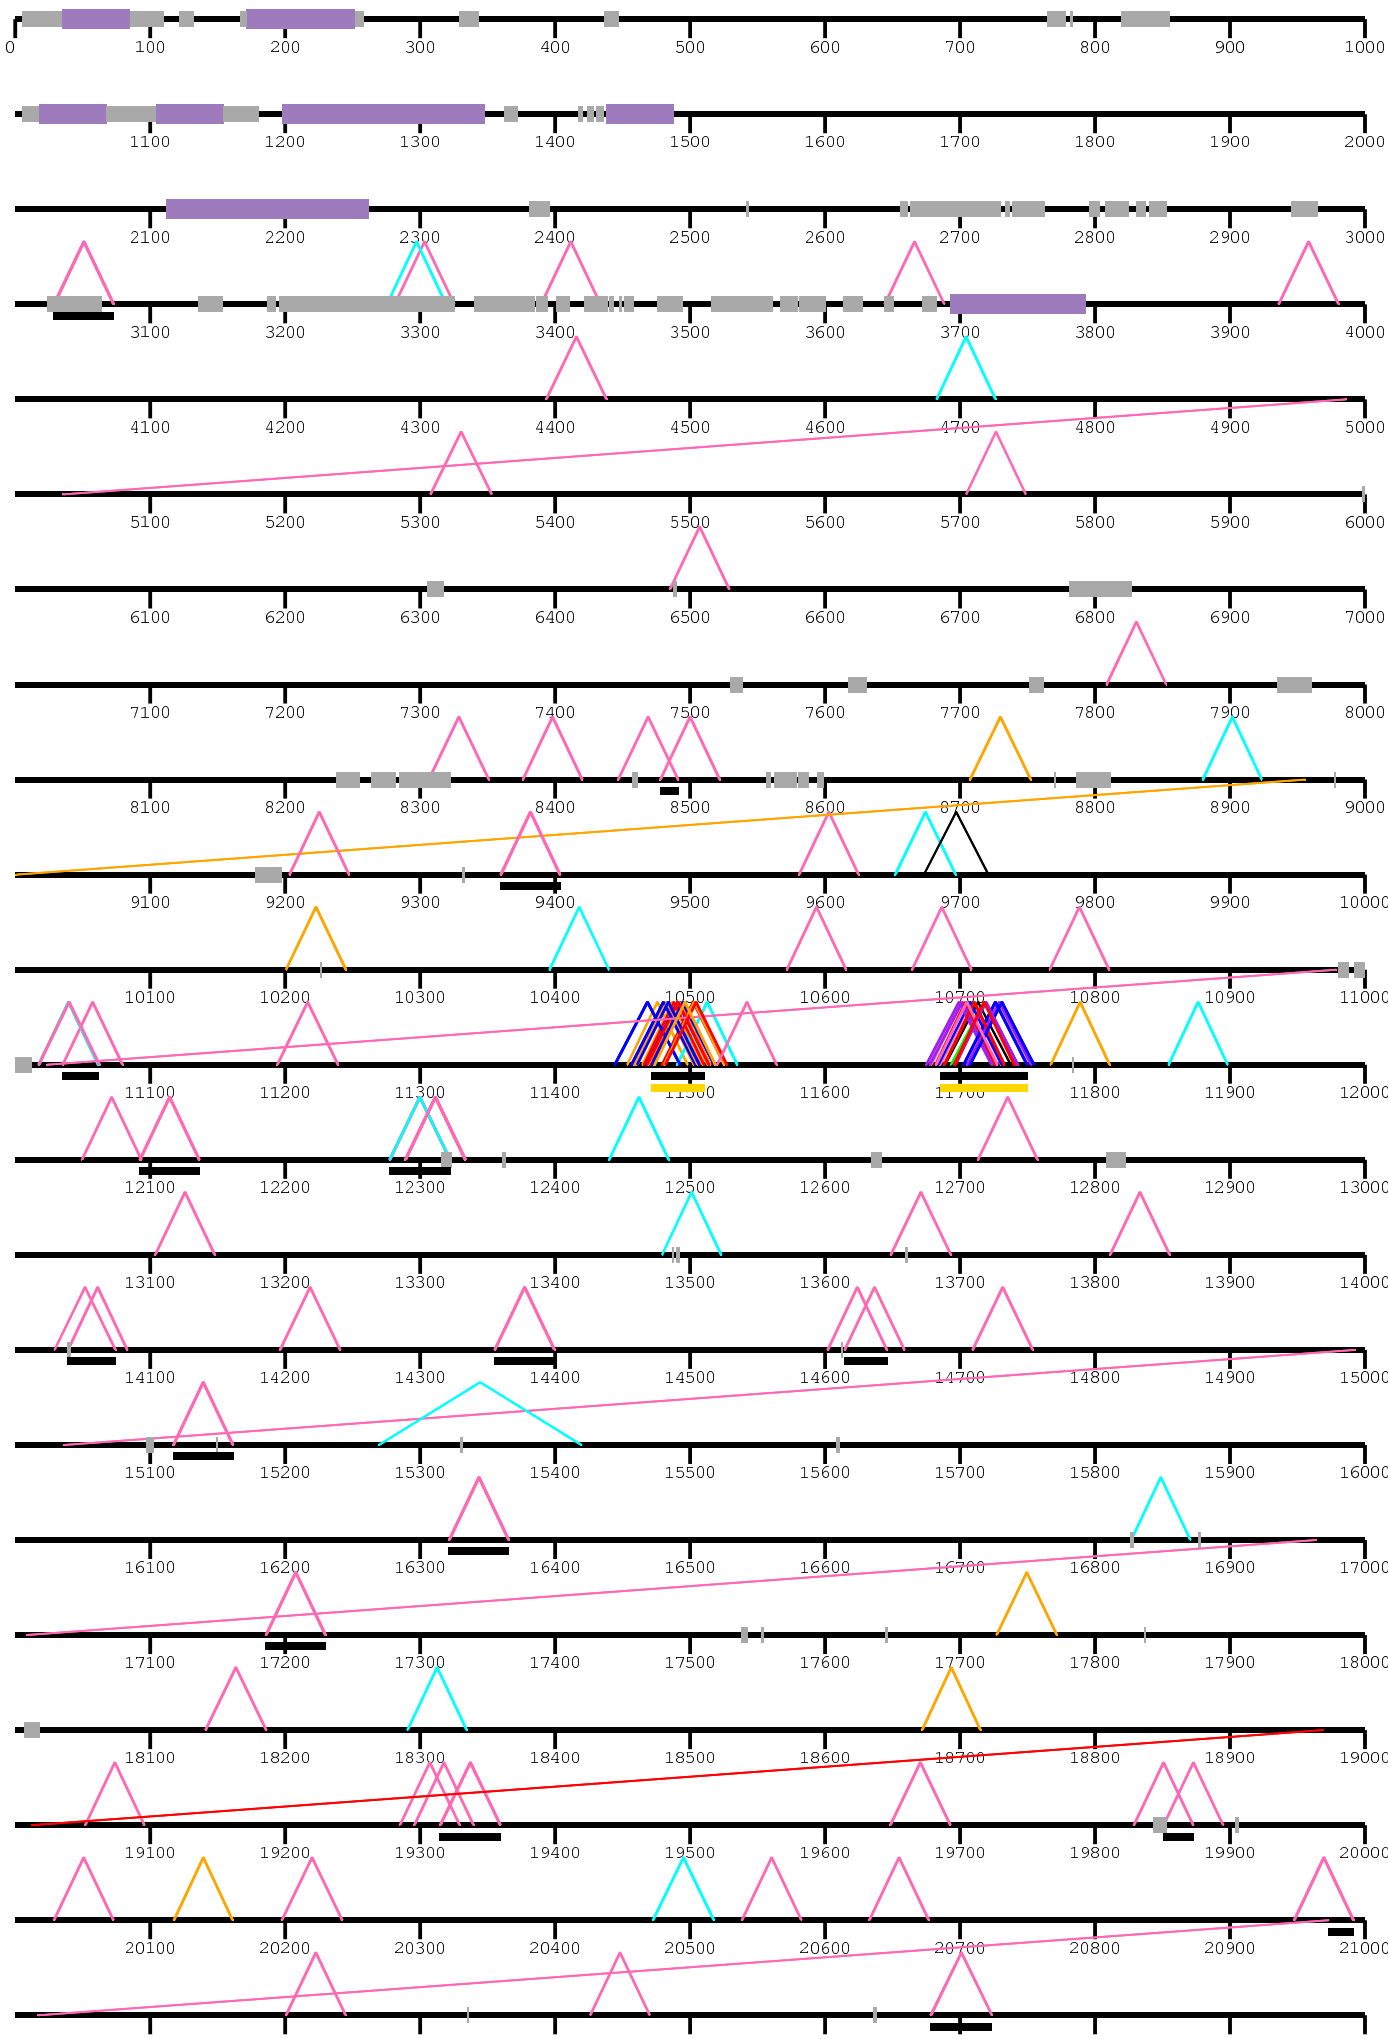

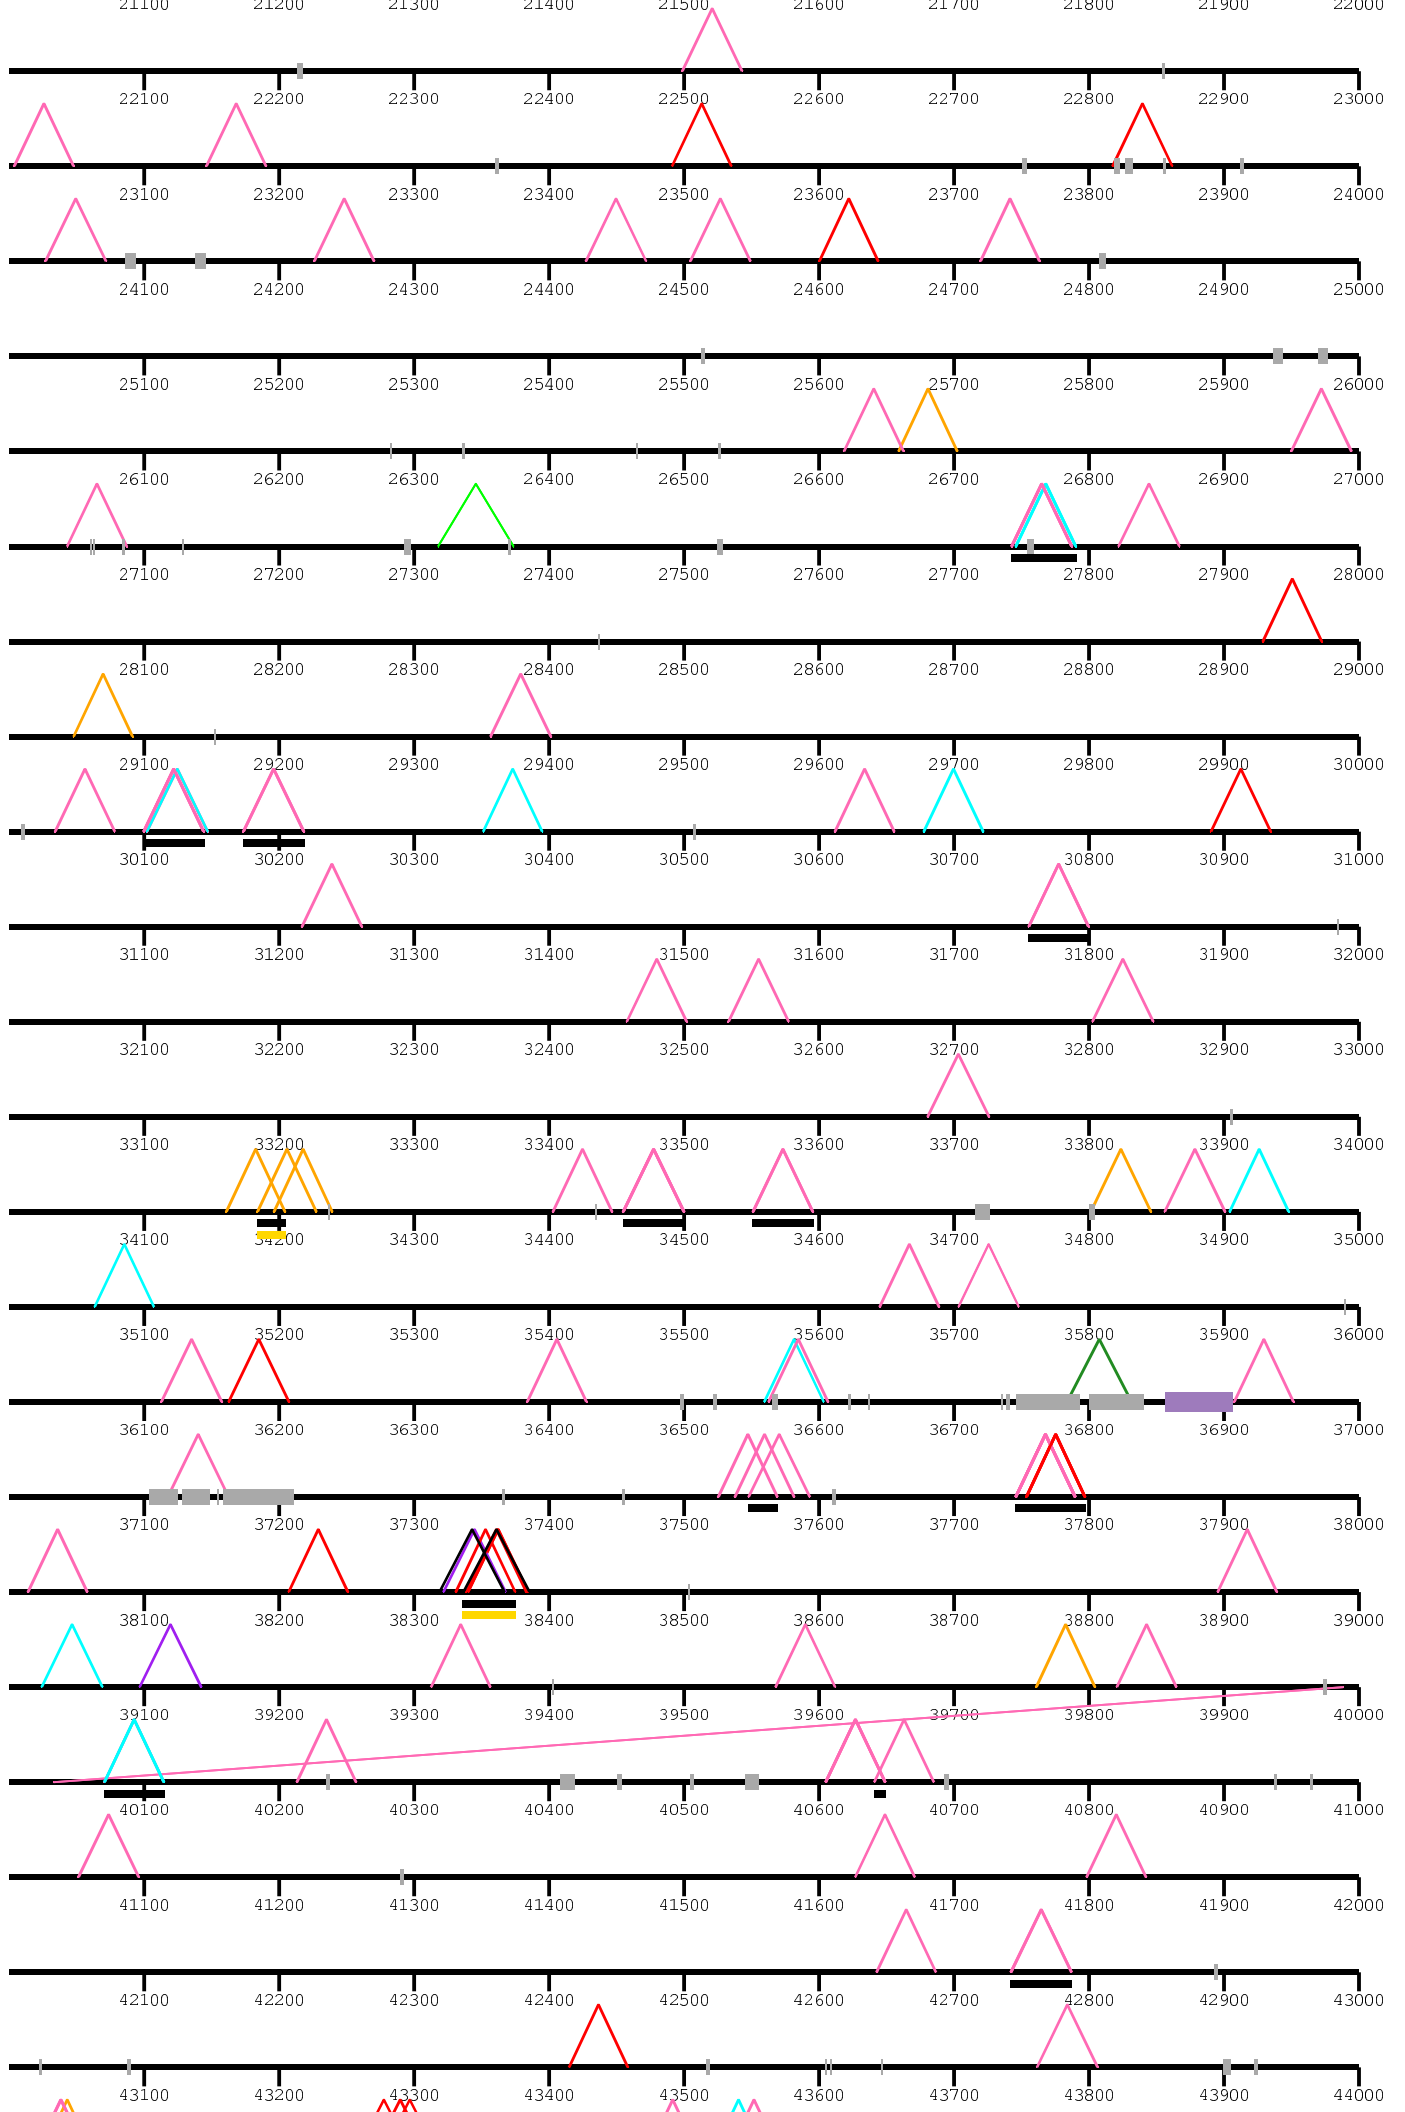



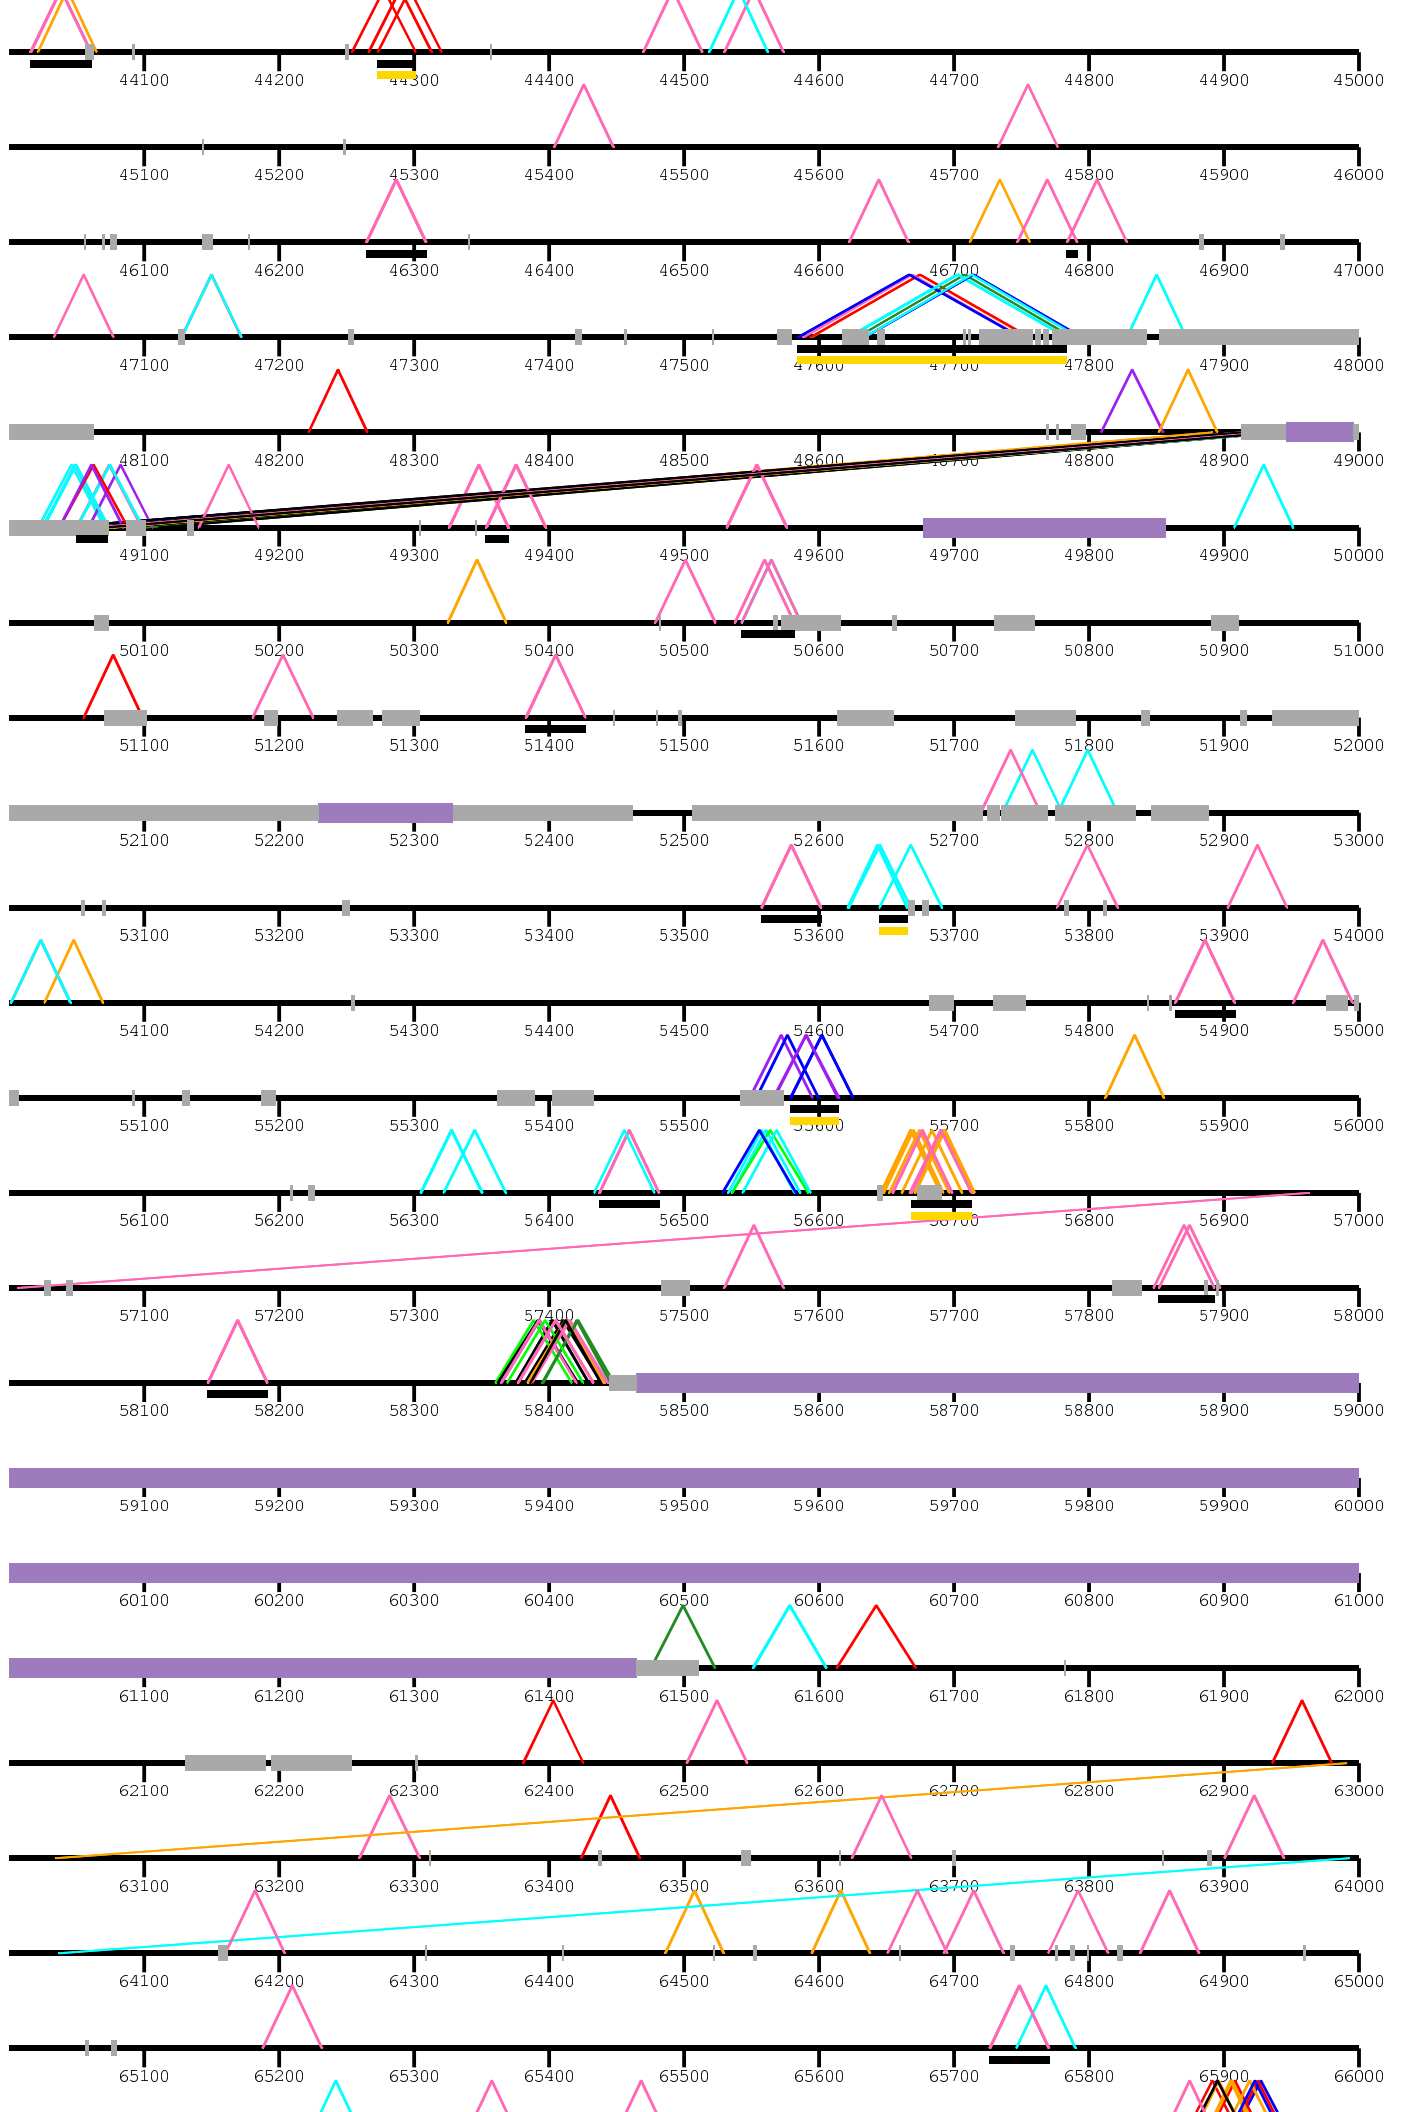

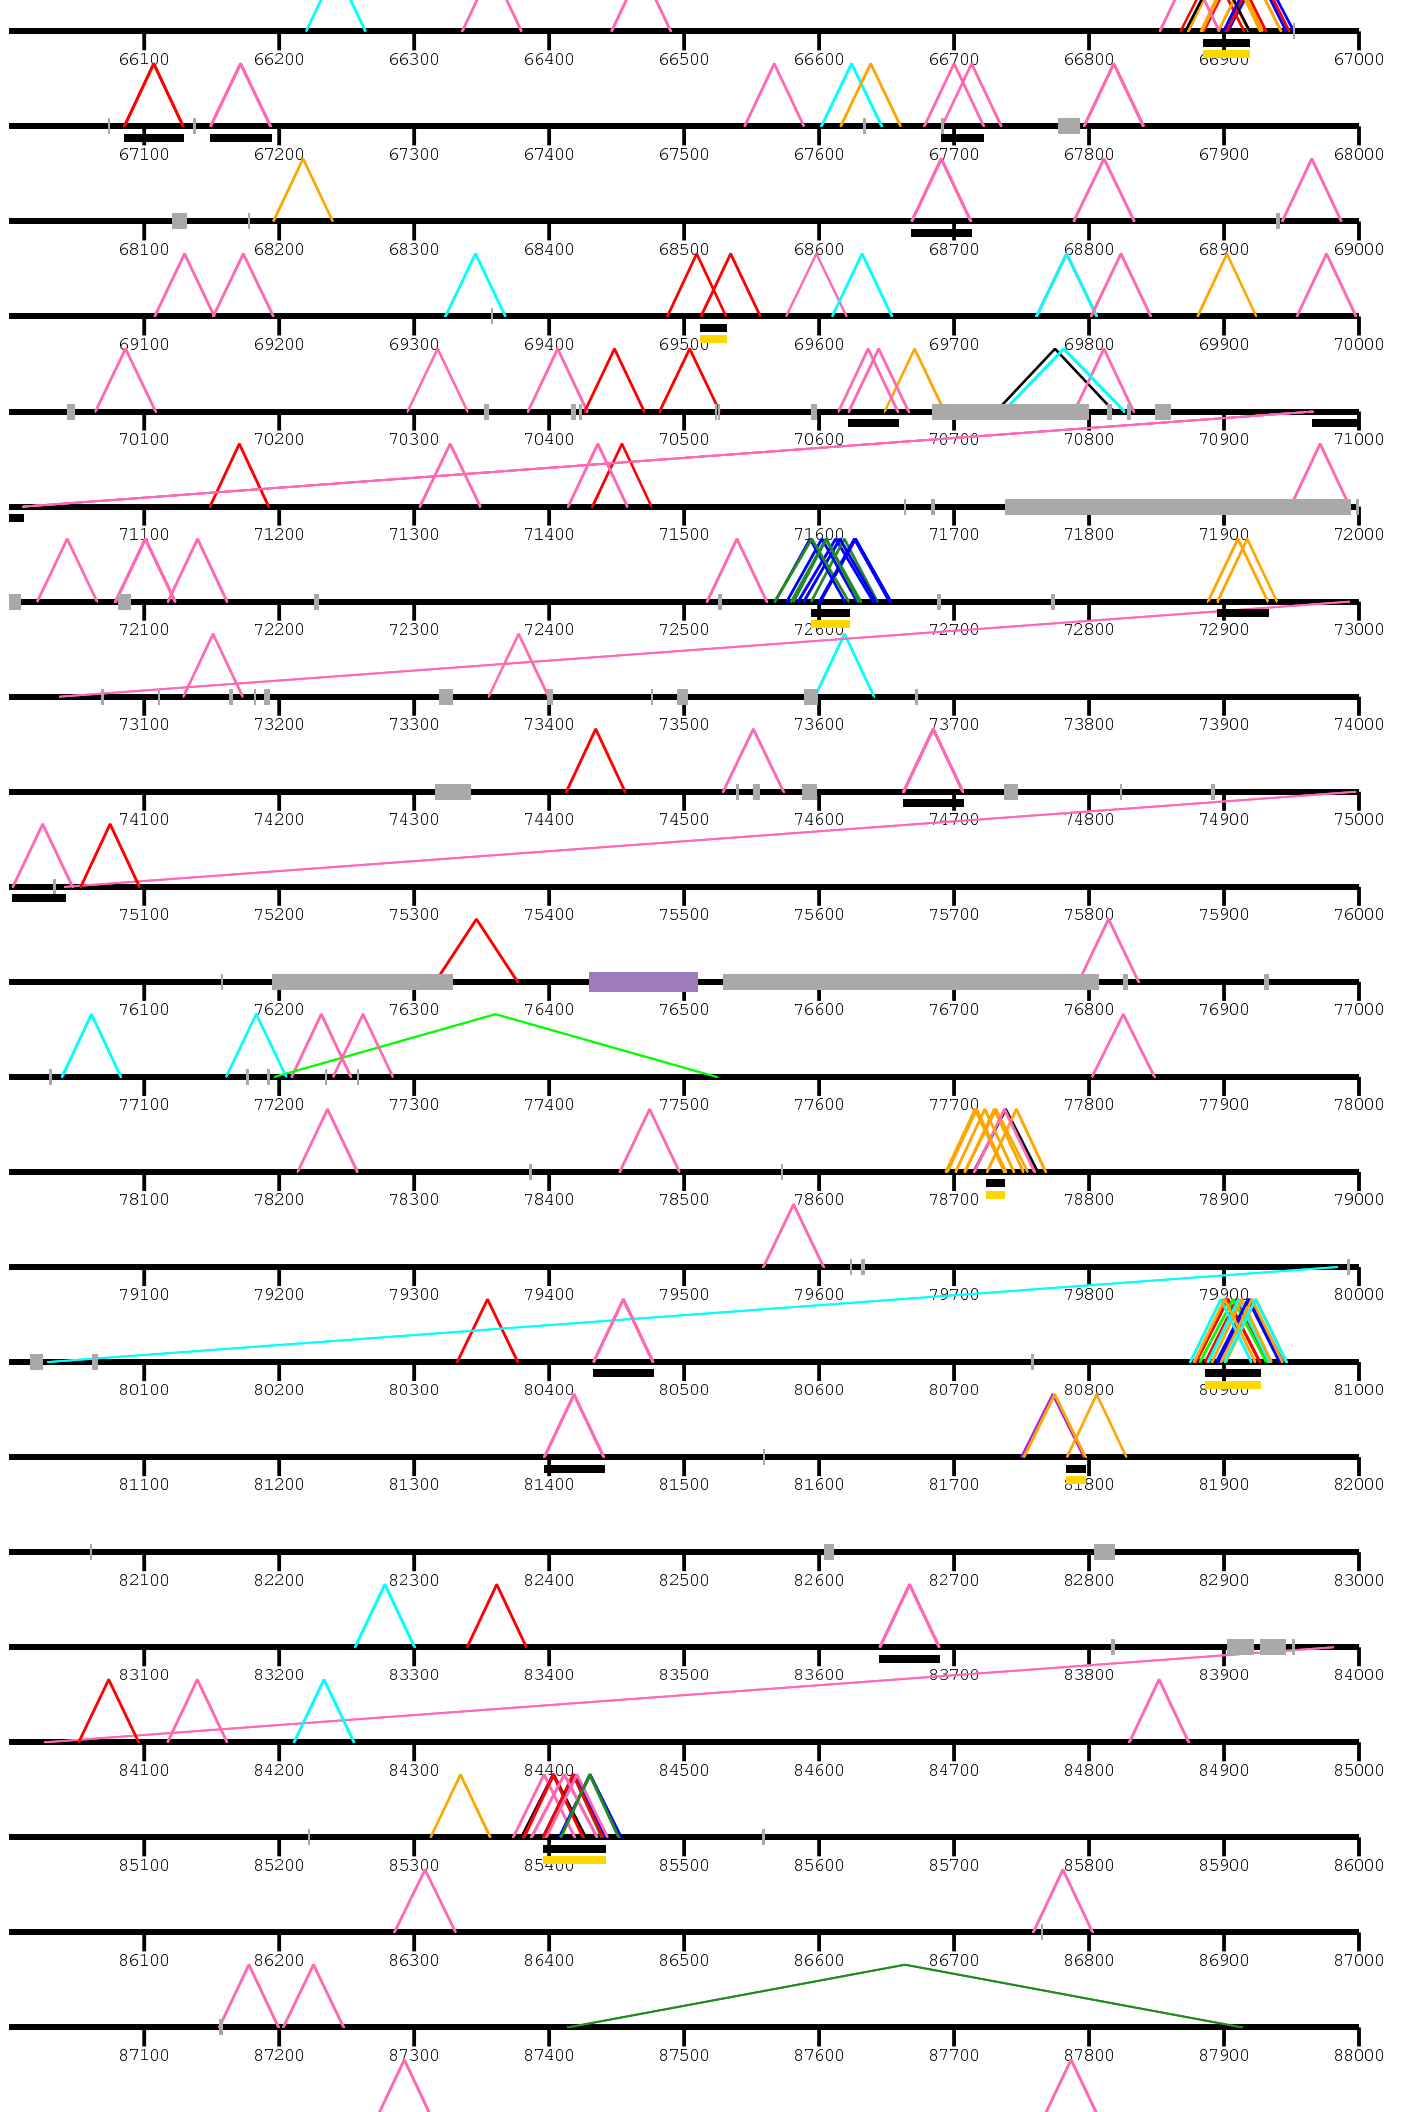

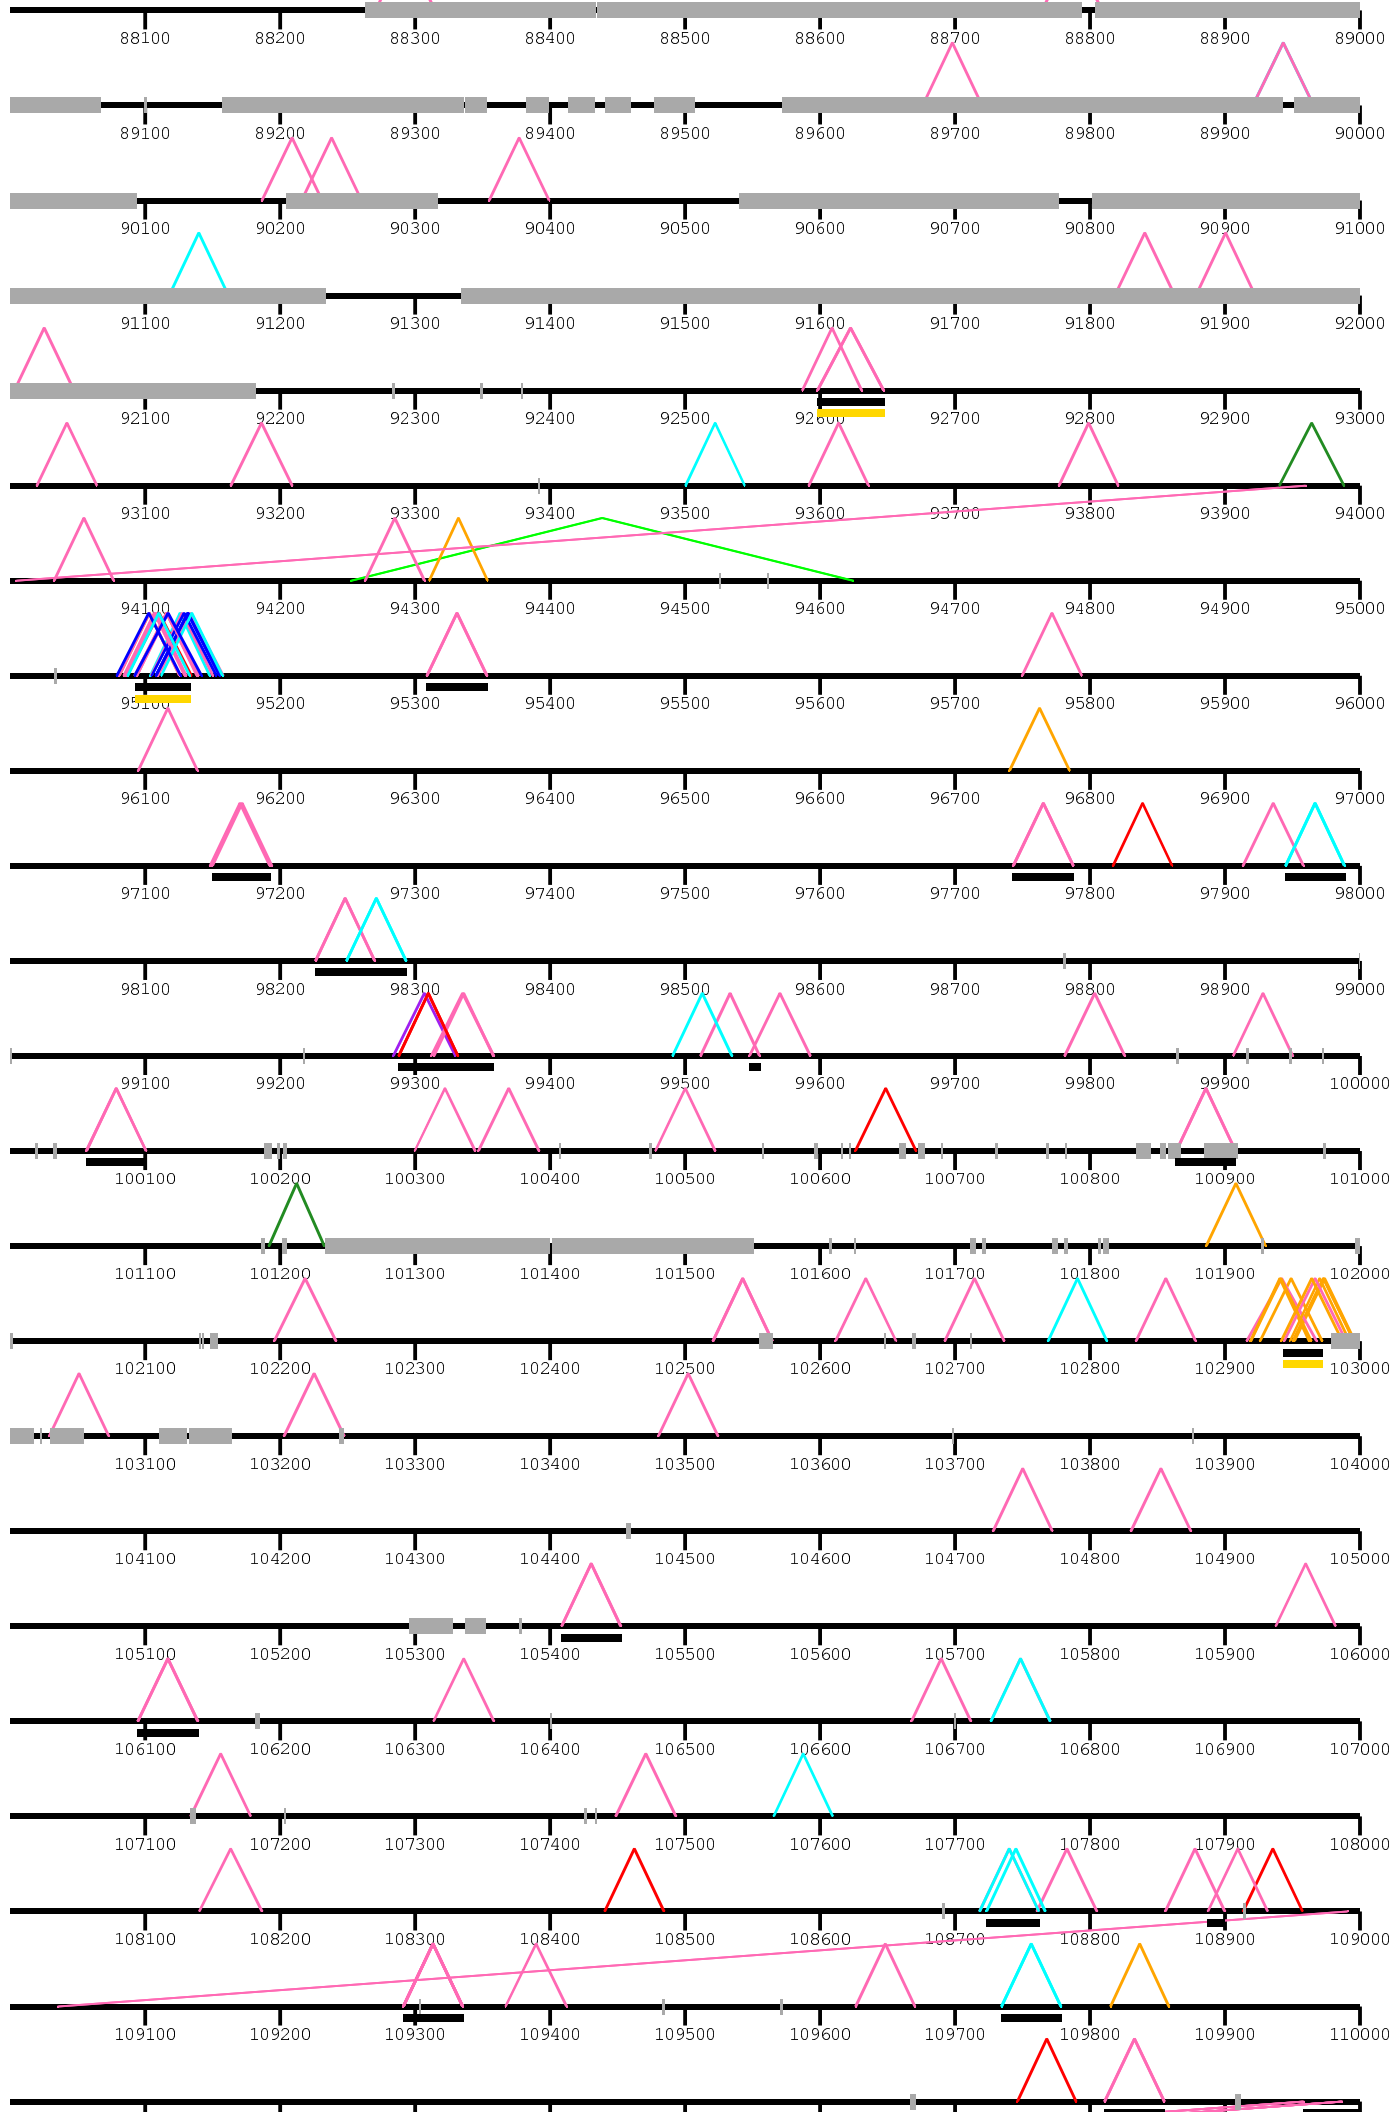

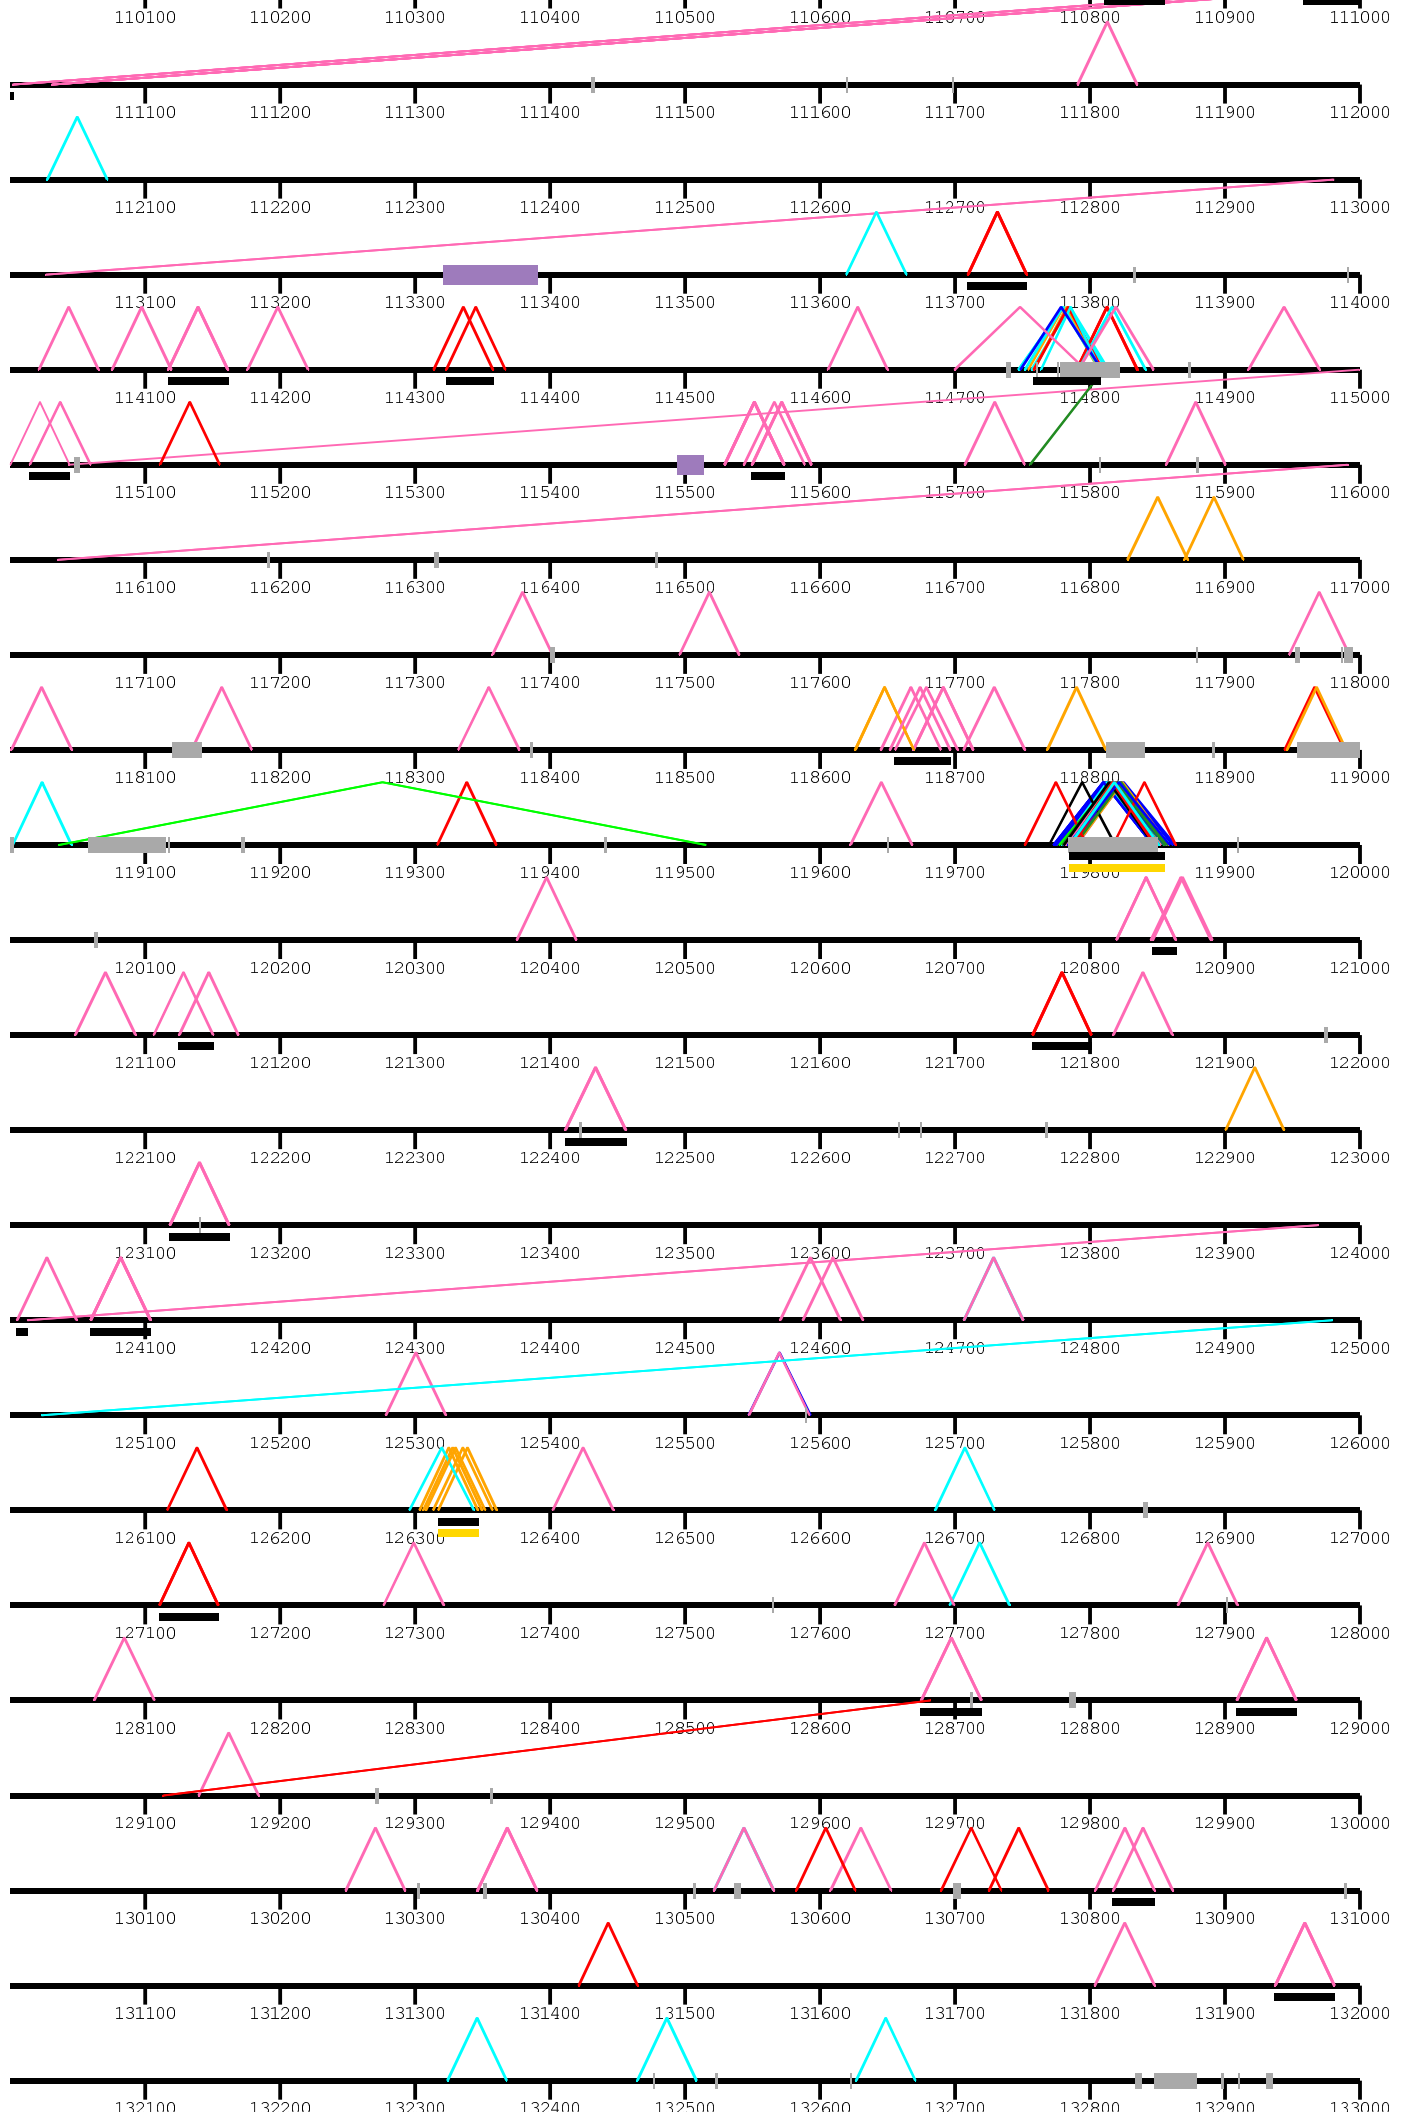

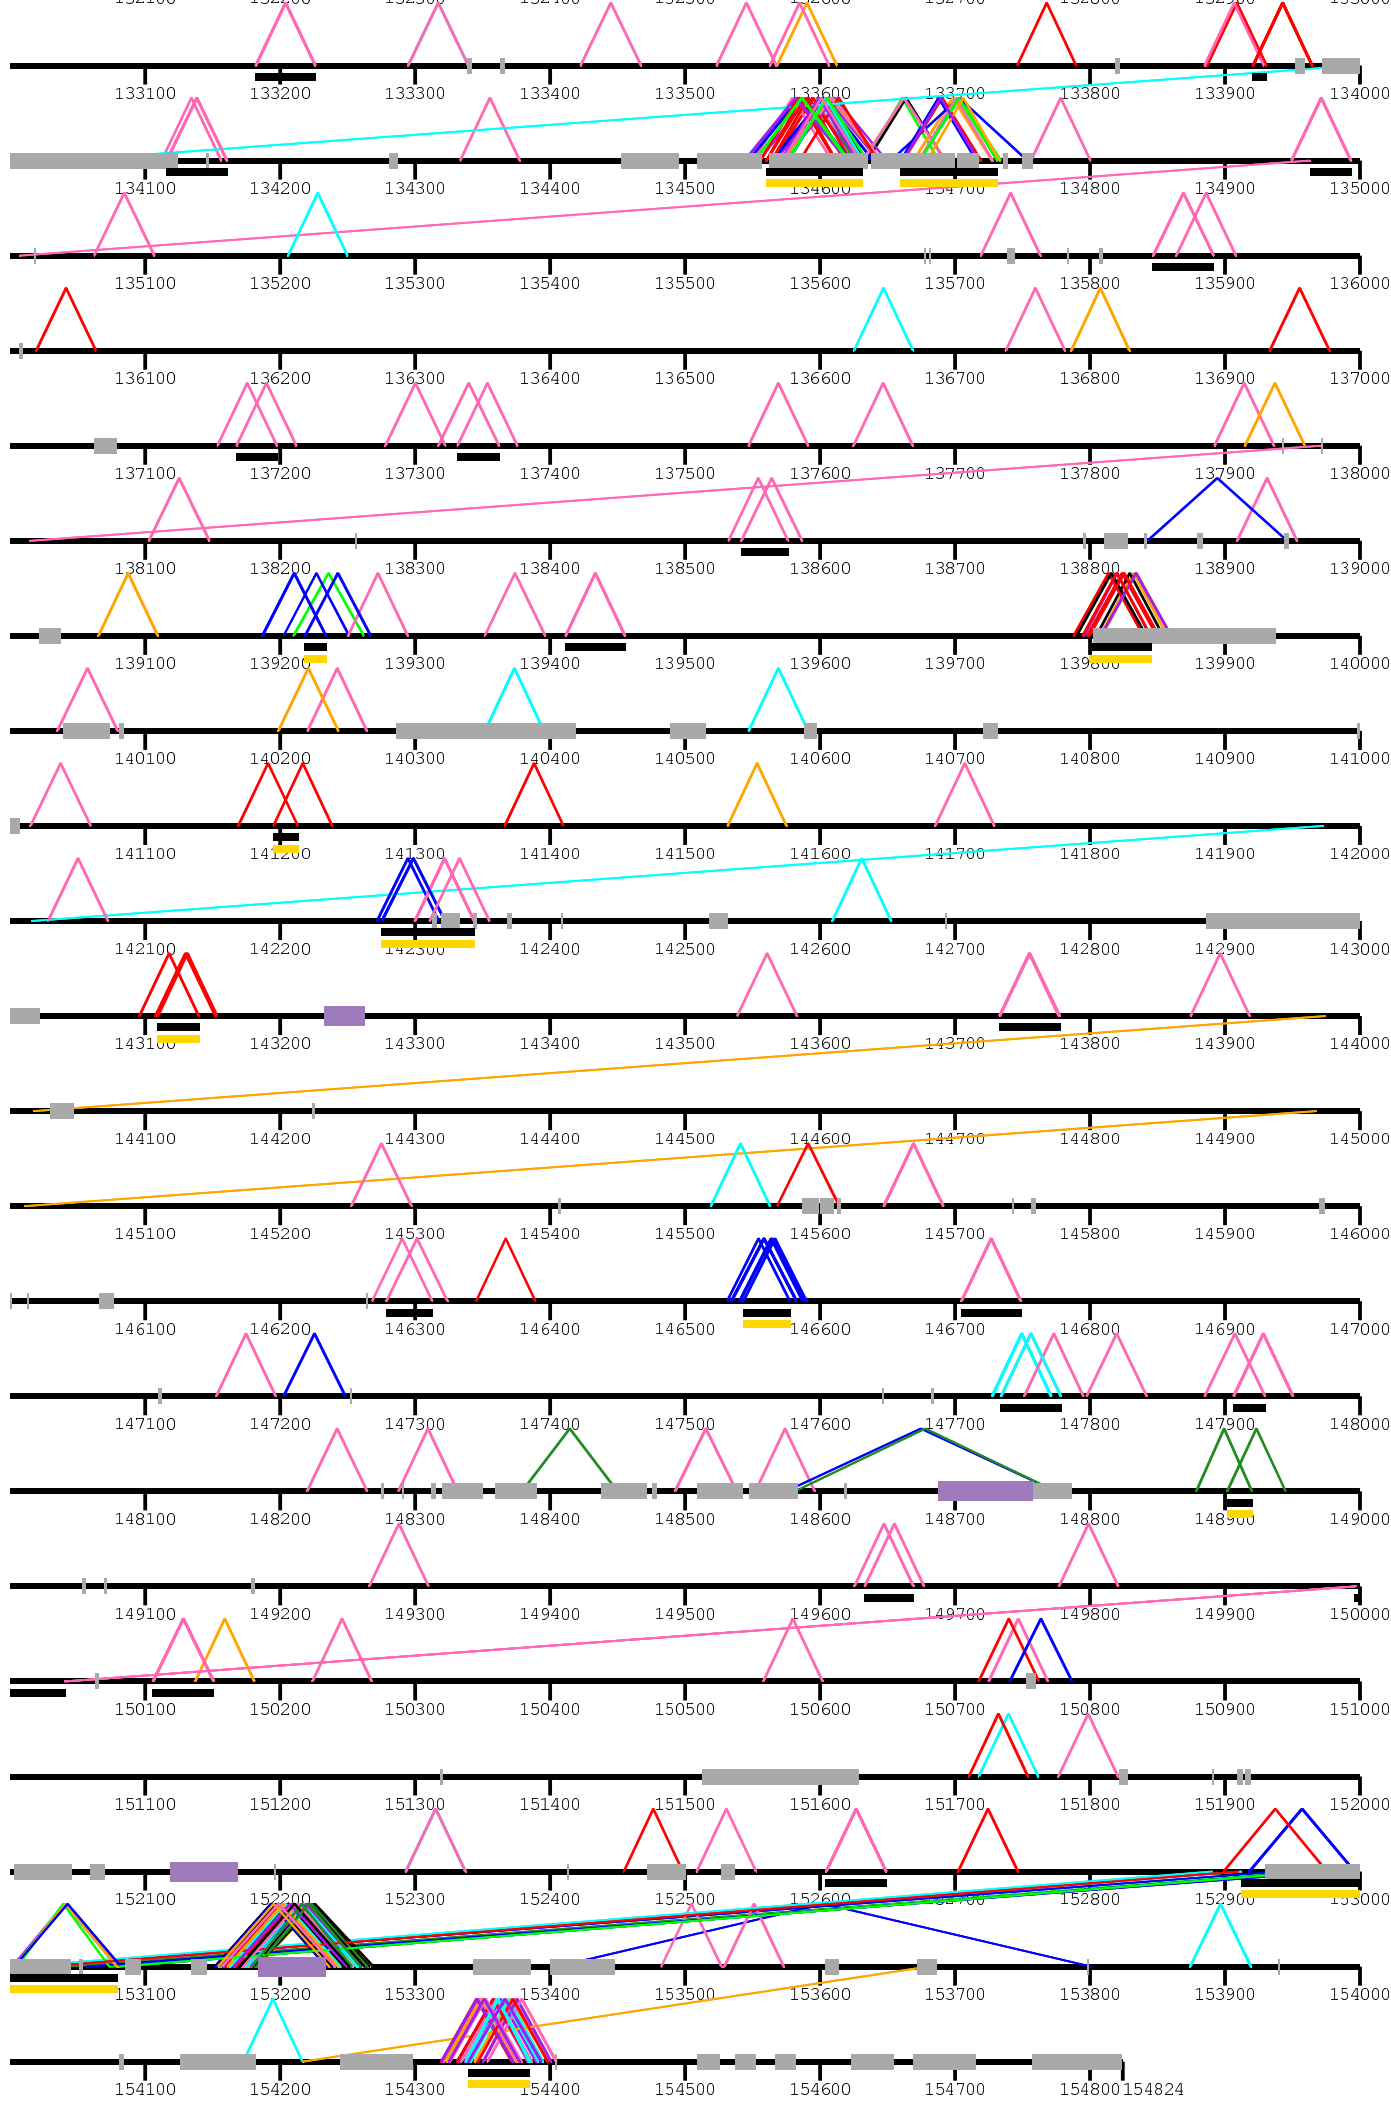

Supplement: 41586_2008_BFnature06862_MOESM225_ESM.pdf [file 41586_2008_BFnature06862_MOESM225_ESM.pdf]
