# Supplementary figures and images for: Mapping and sequencing of structural variation from eight human genomes
Source: Springer Nature journal article supplement (doi:10.1038/nature06862), 2008-04-30

Figure S3 b)  
Insertions

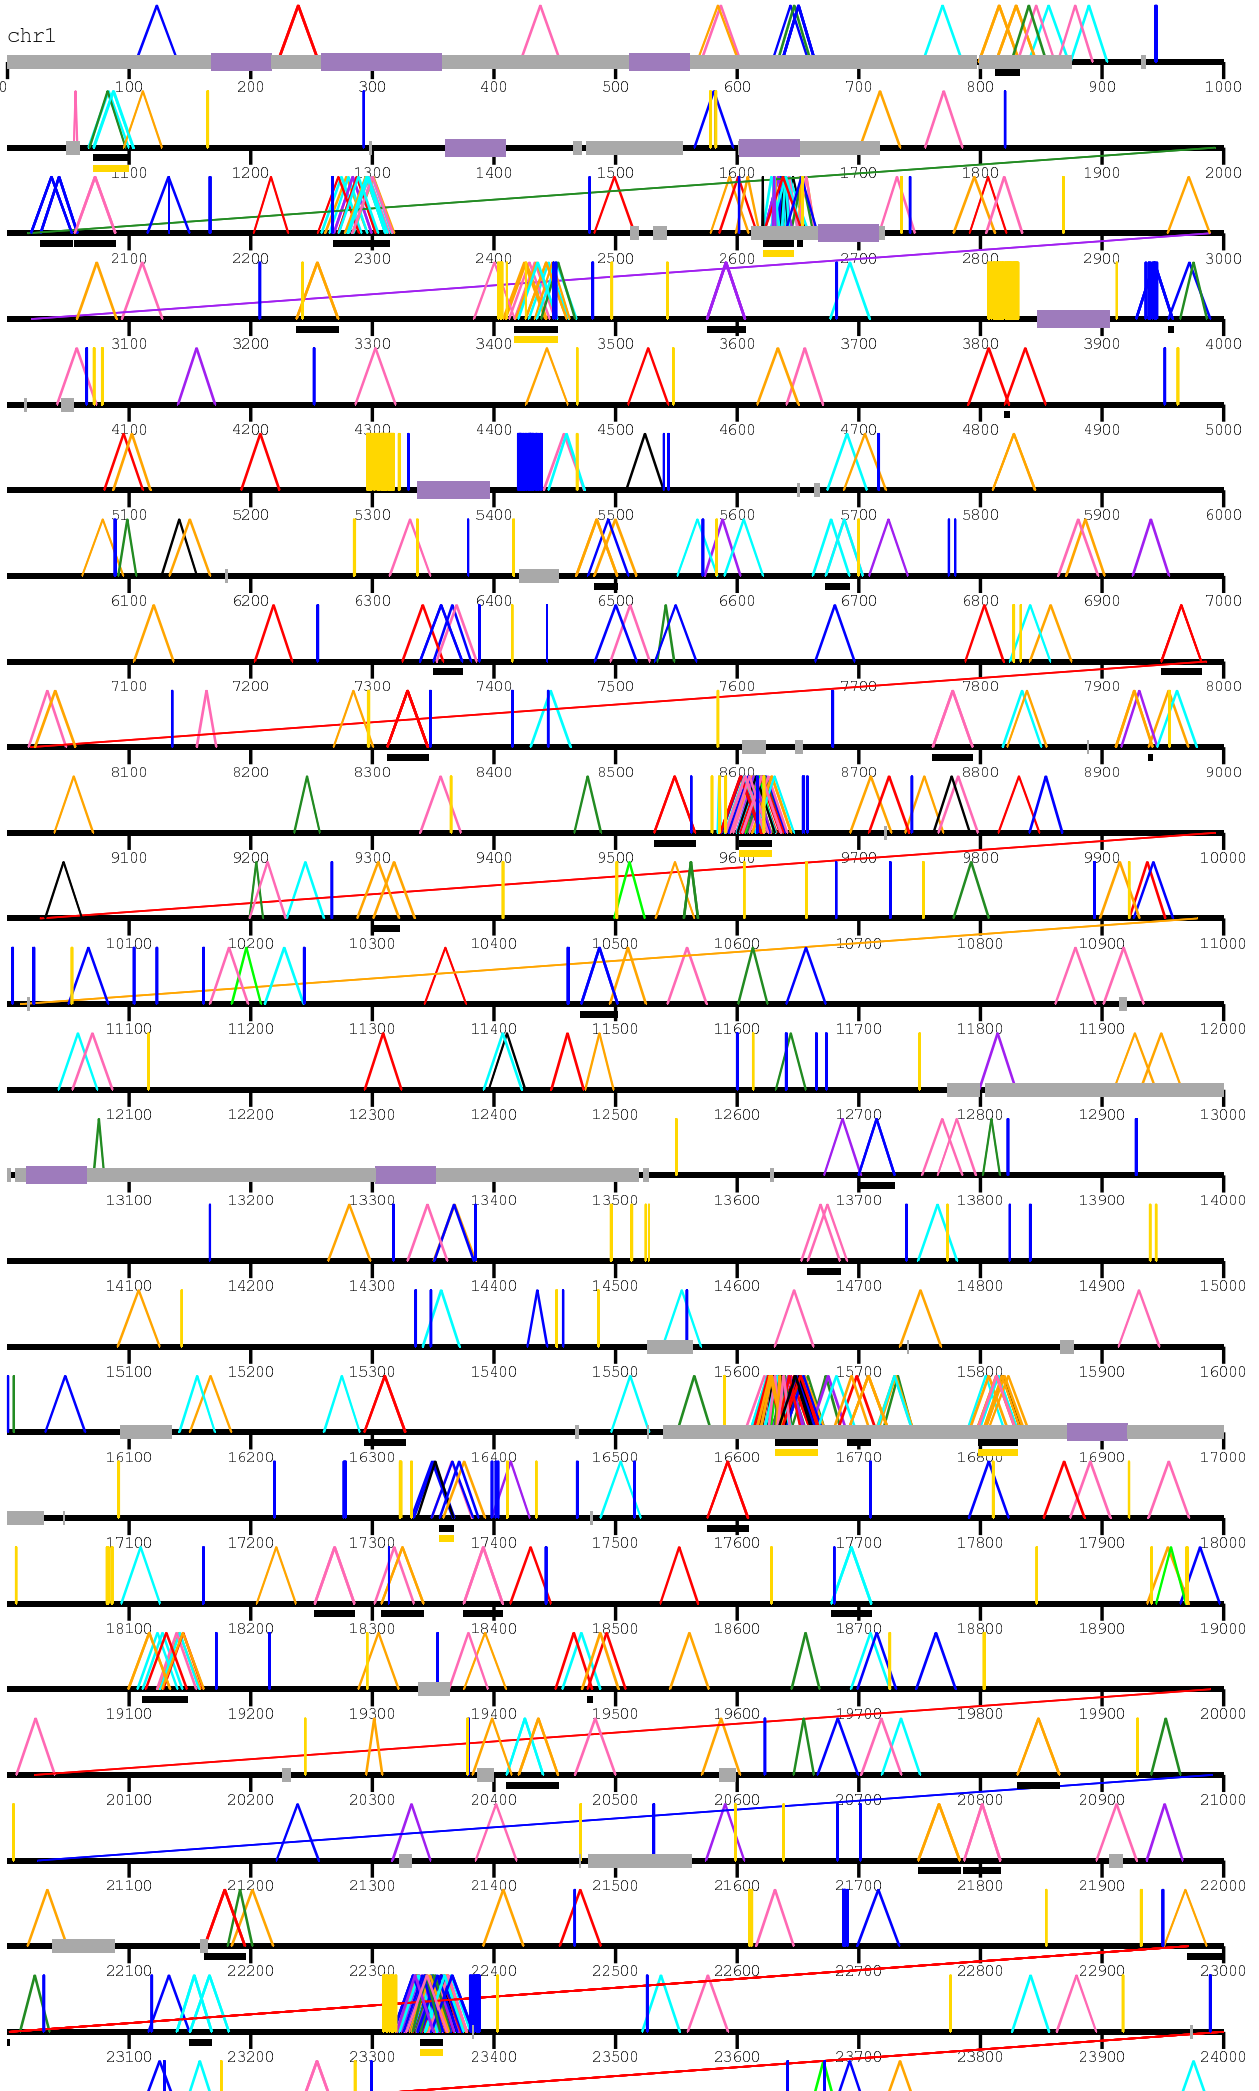

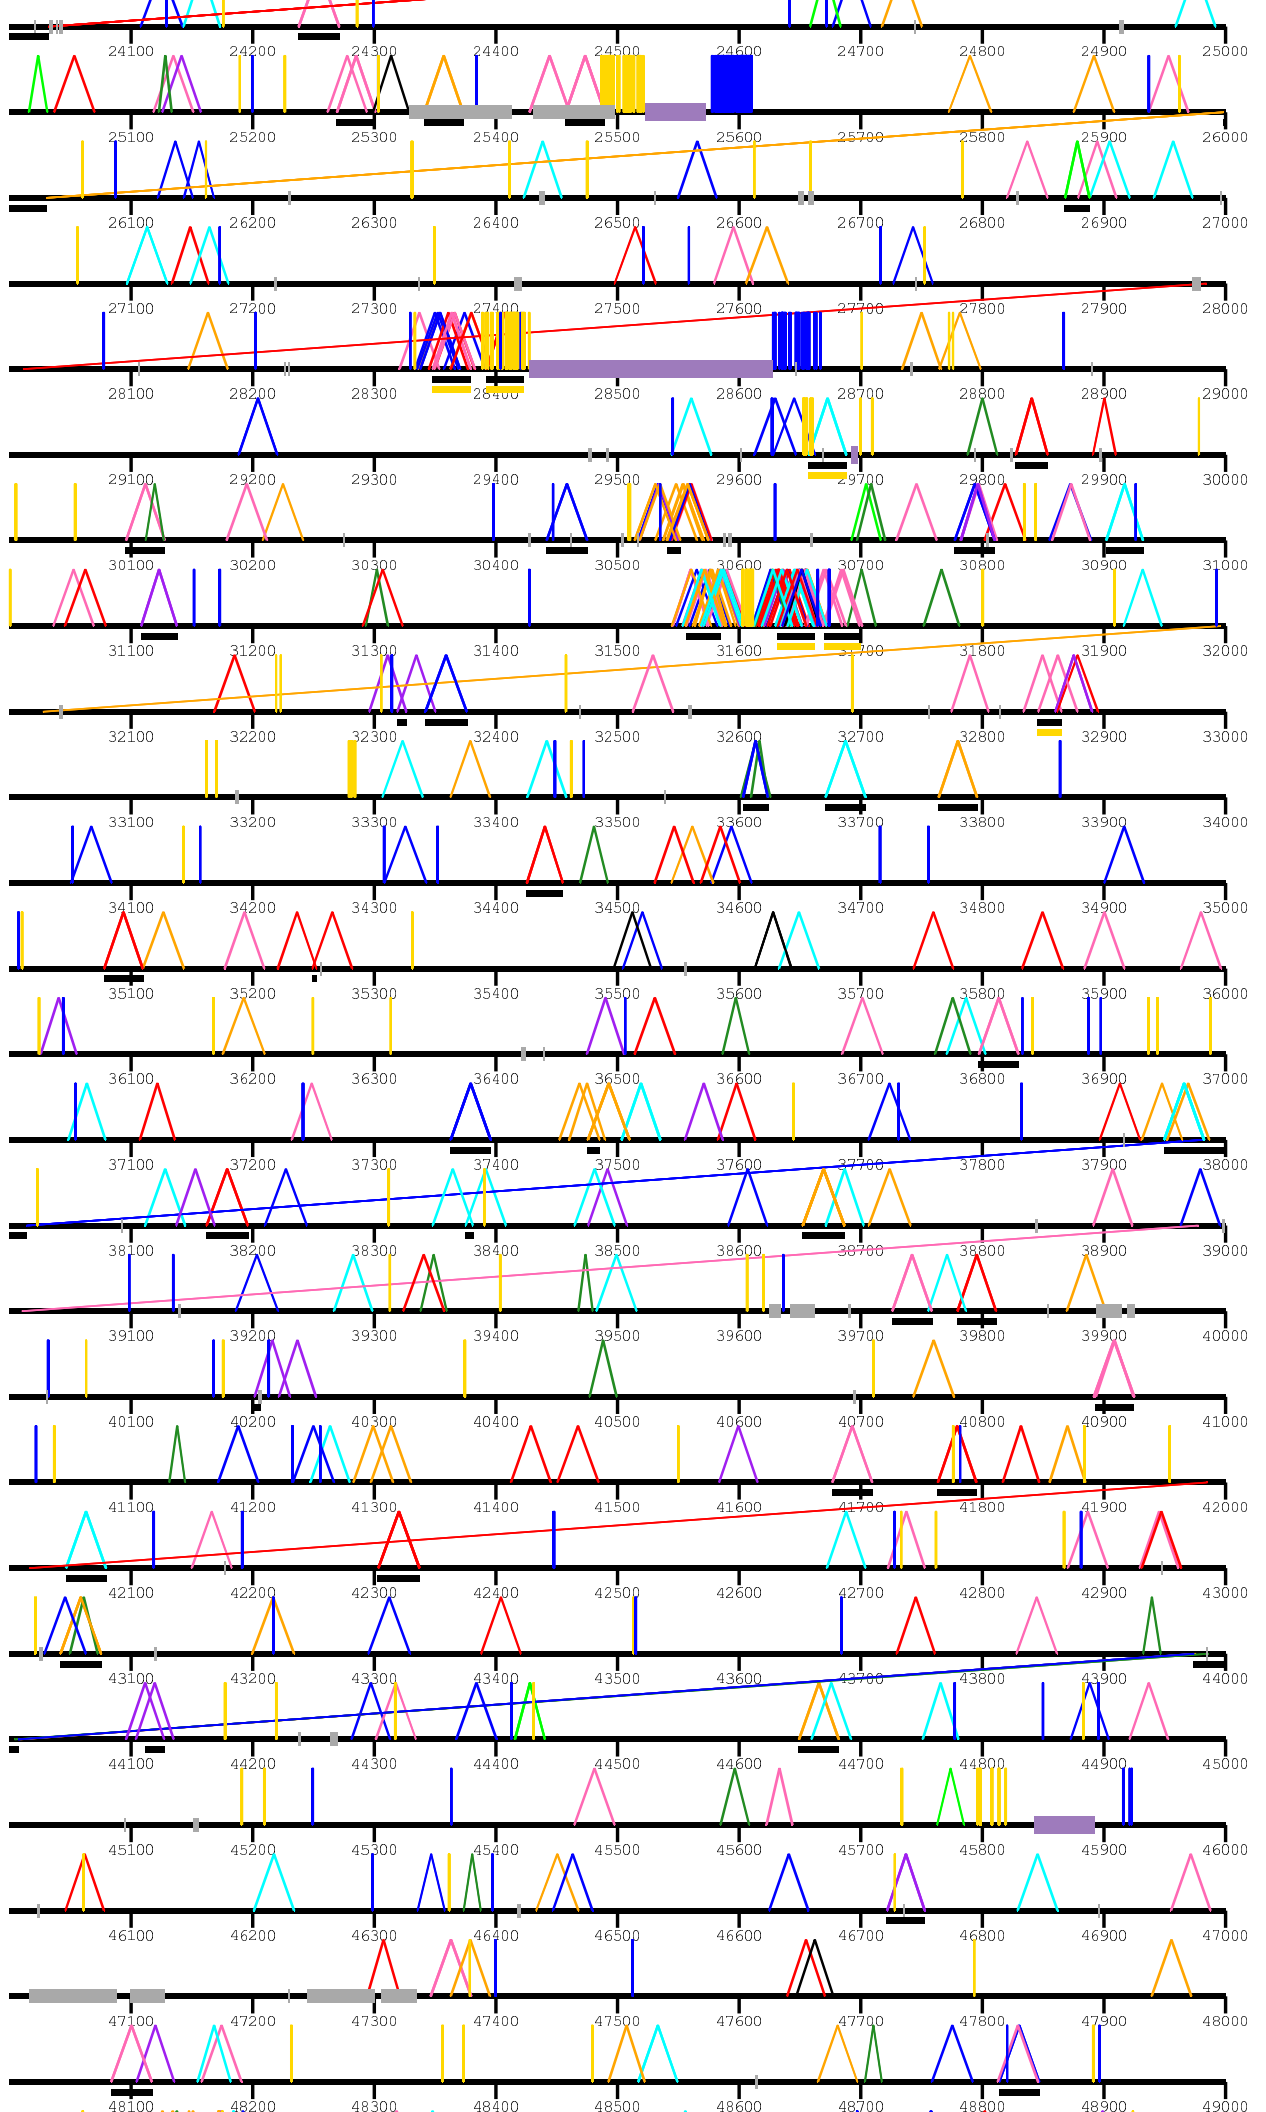

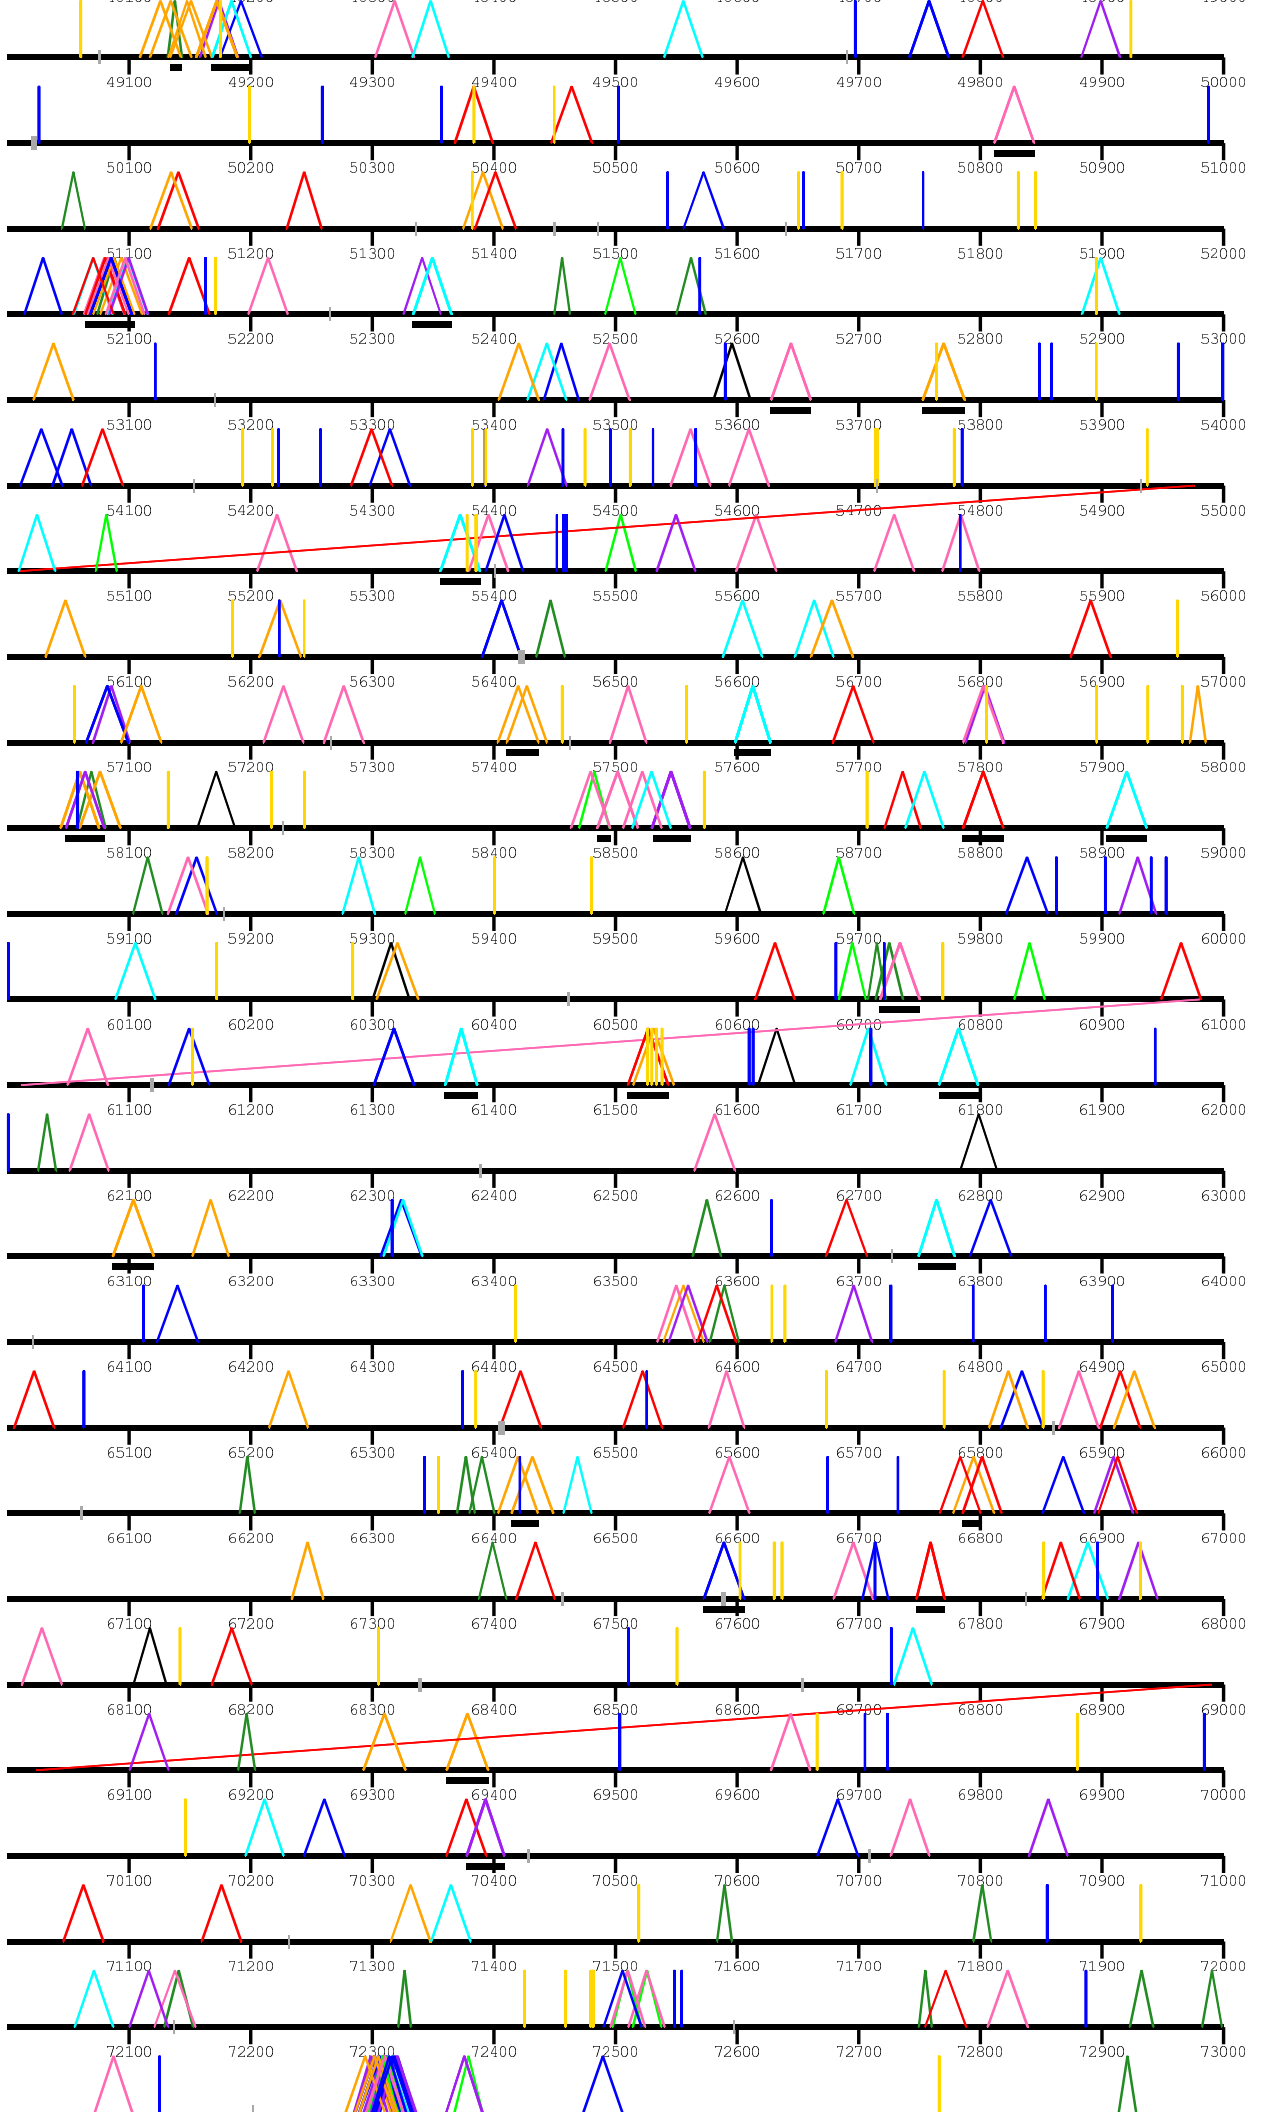

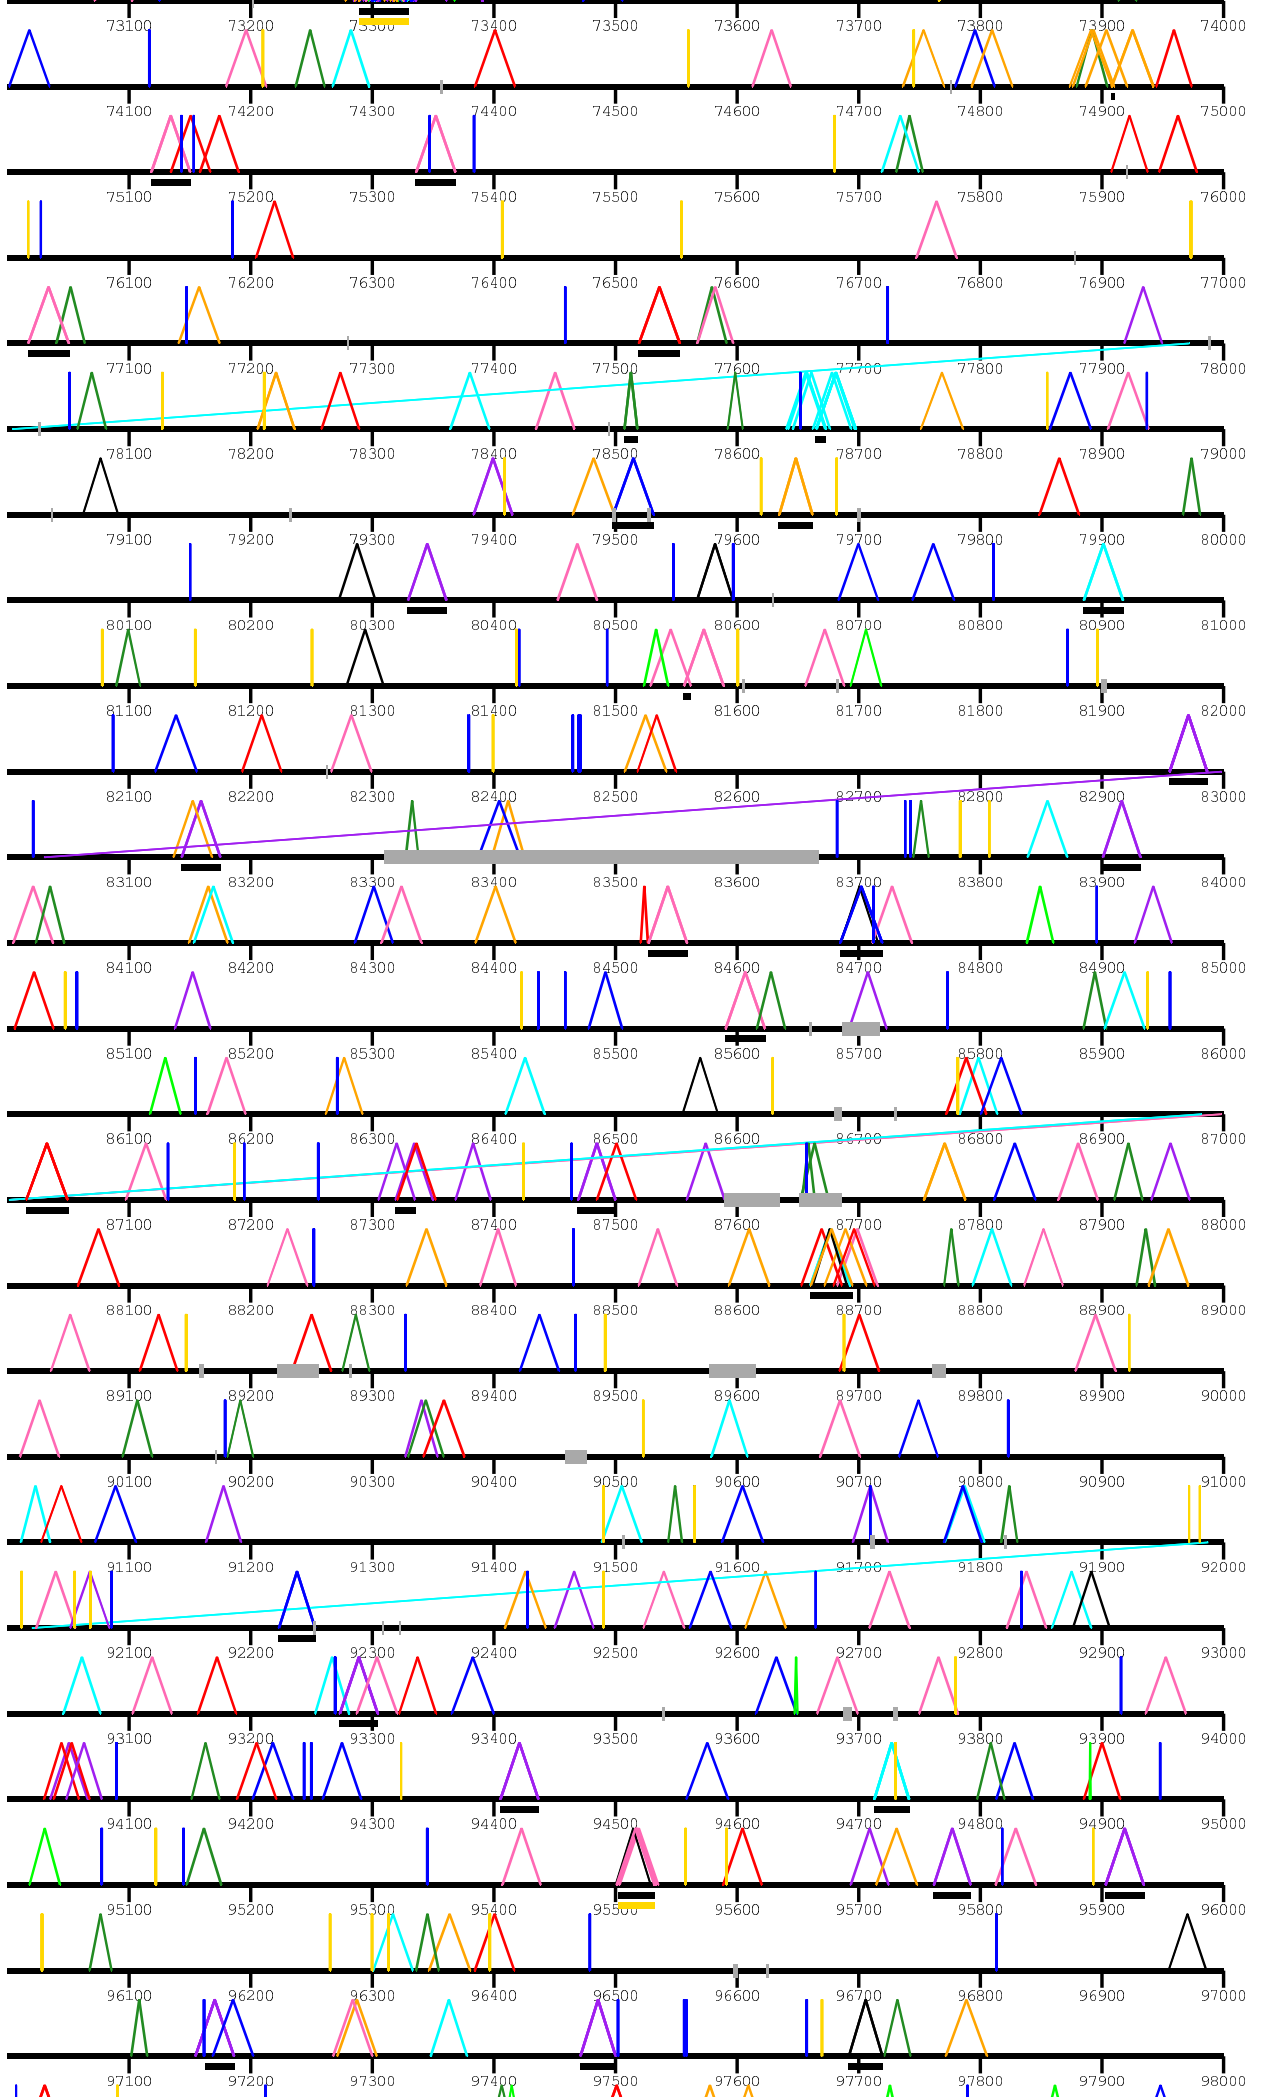

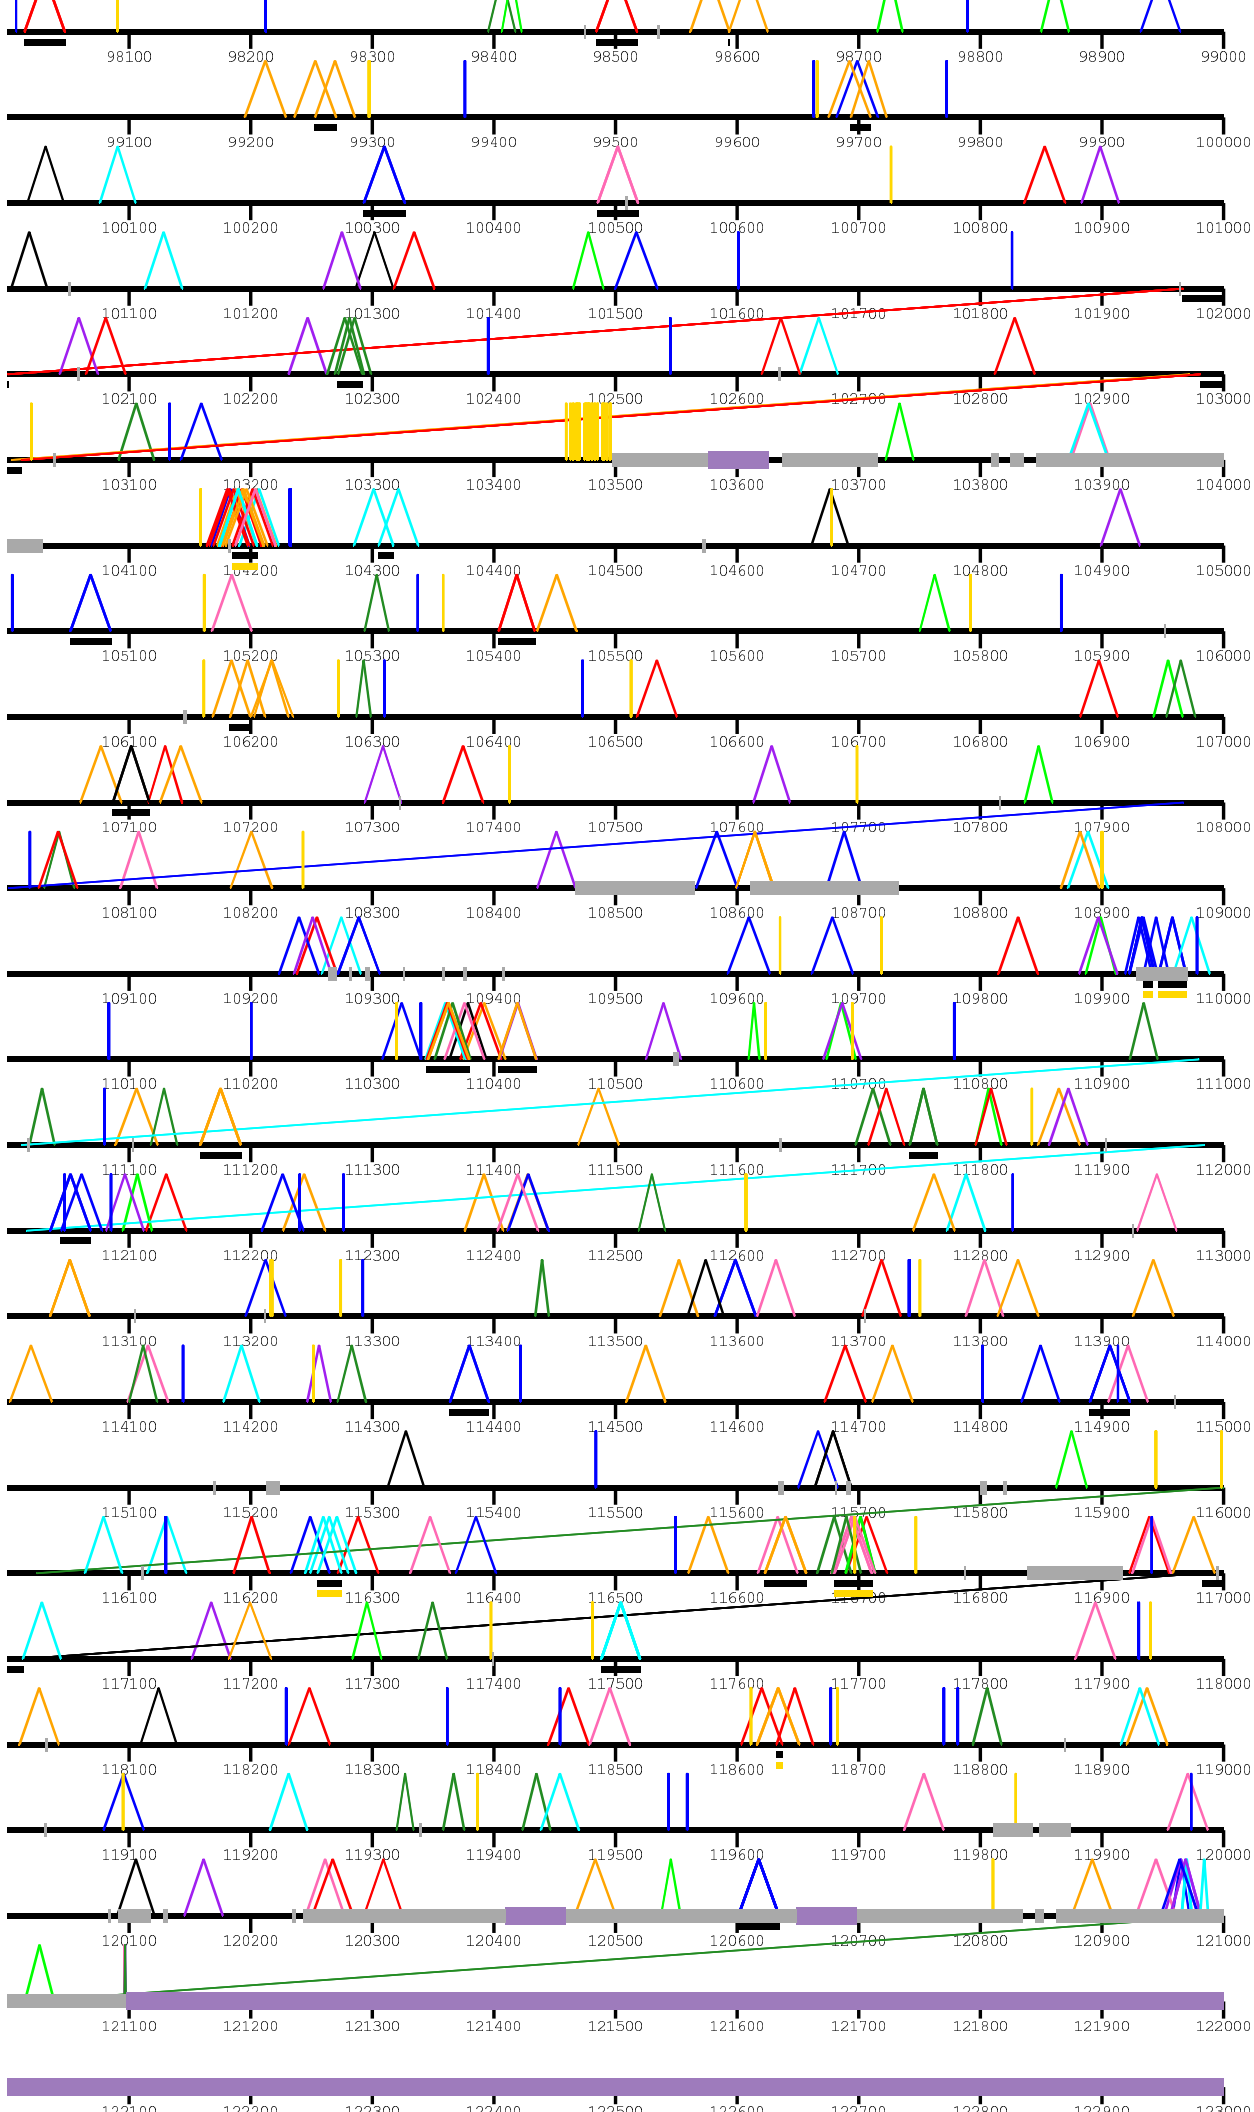

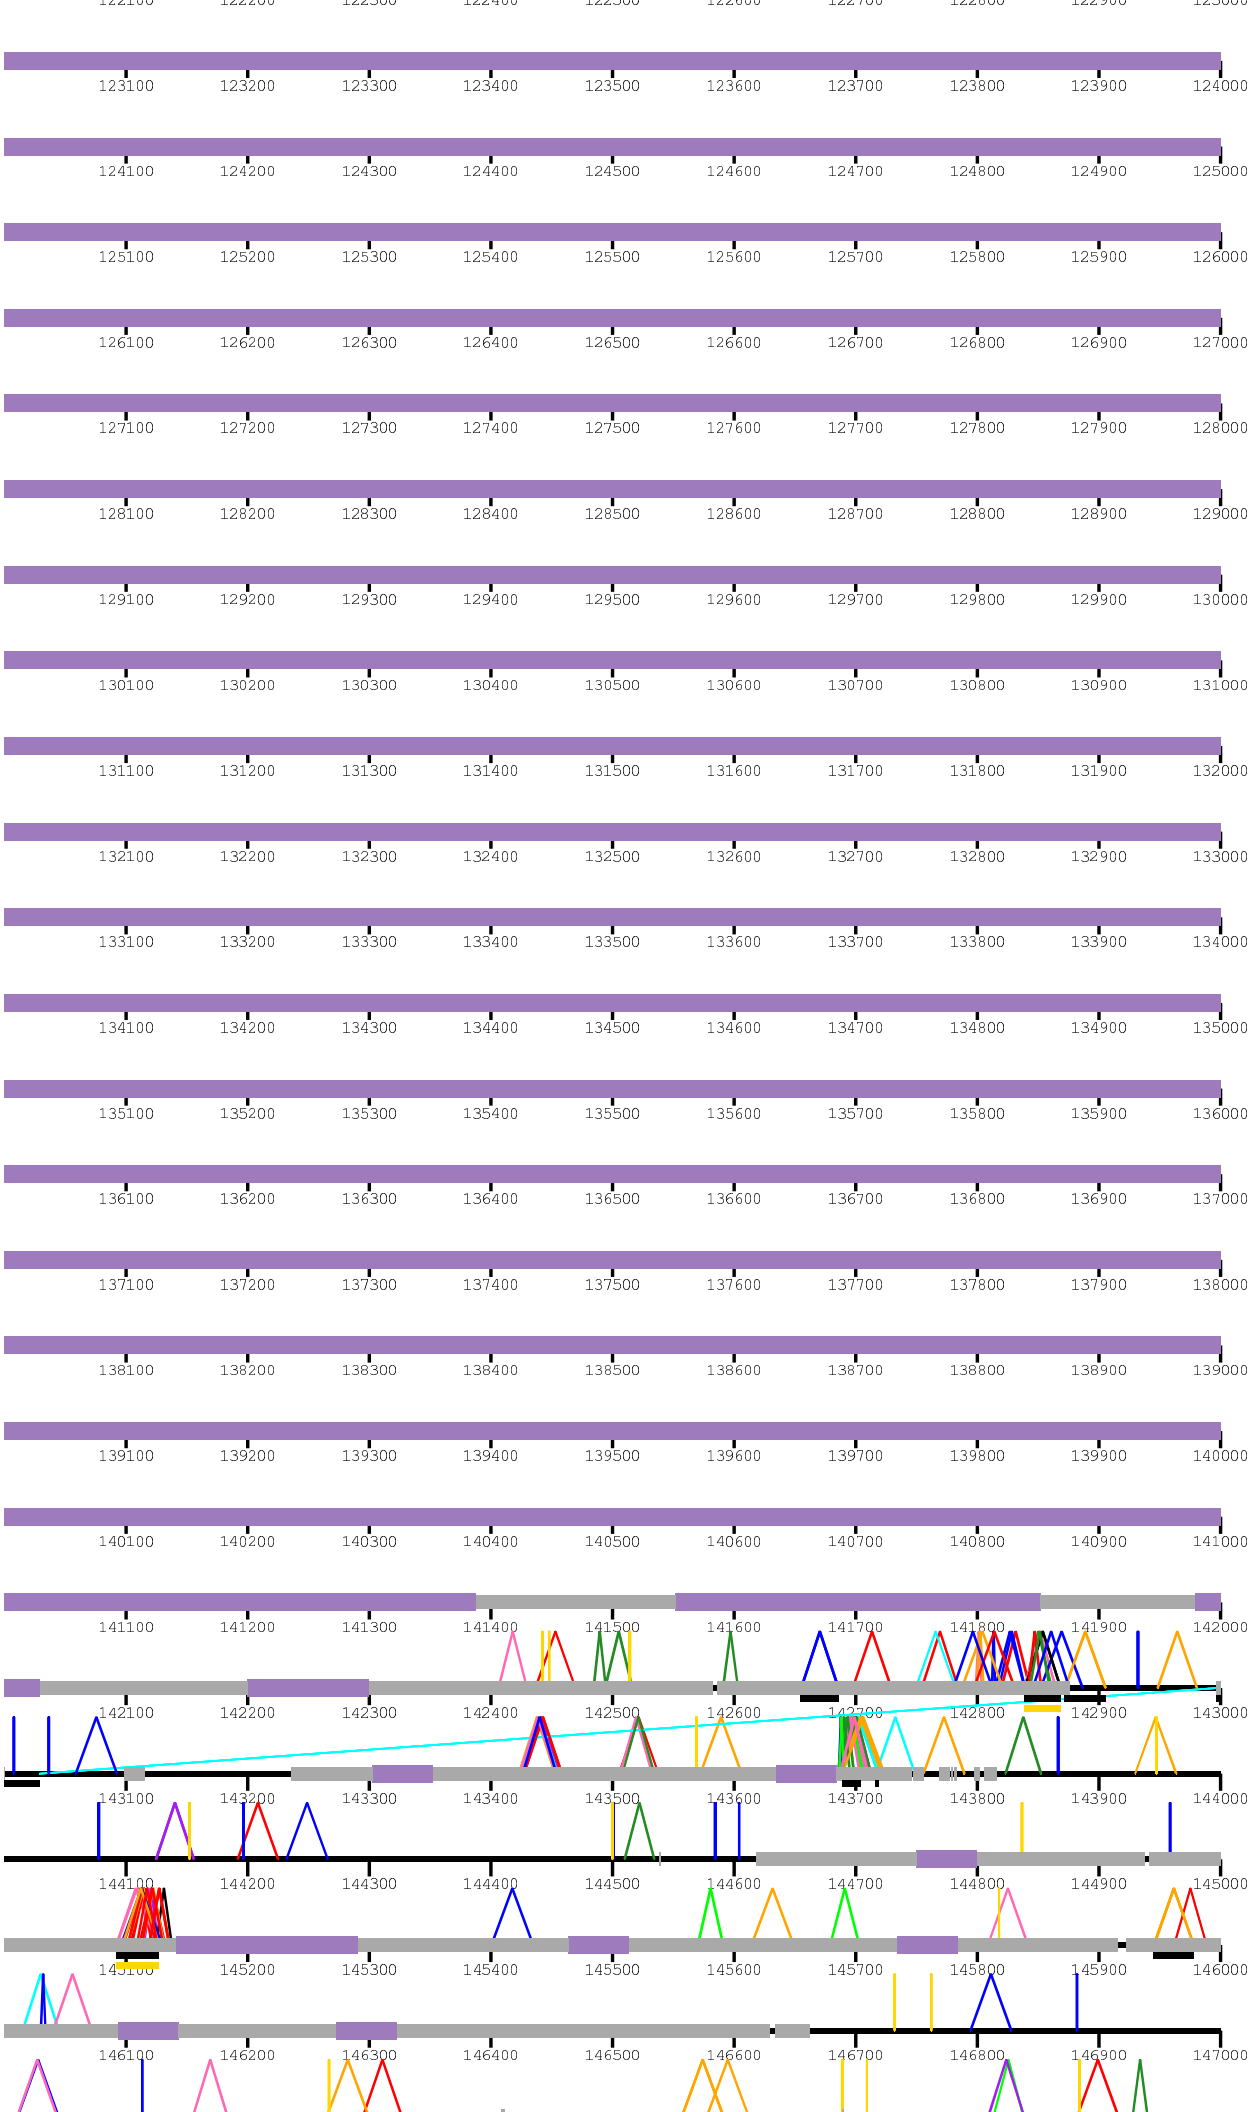

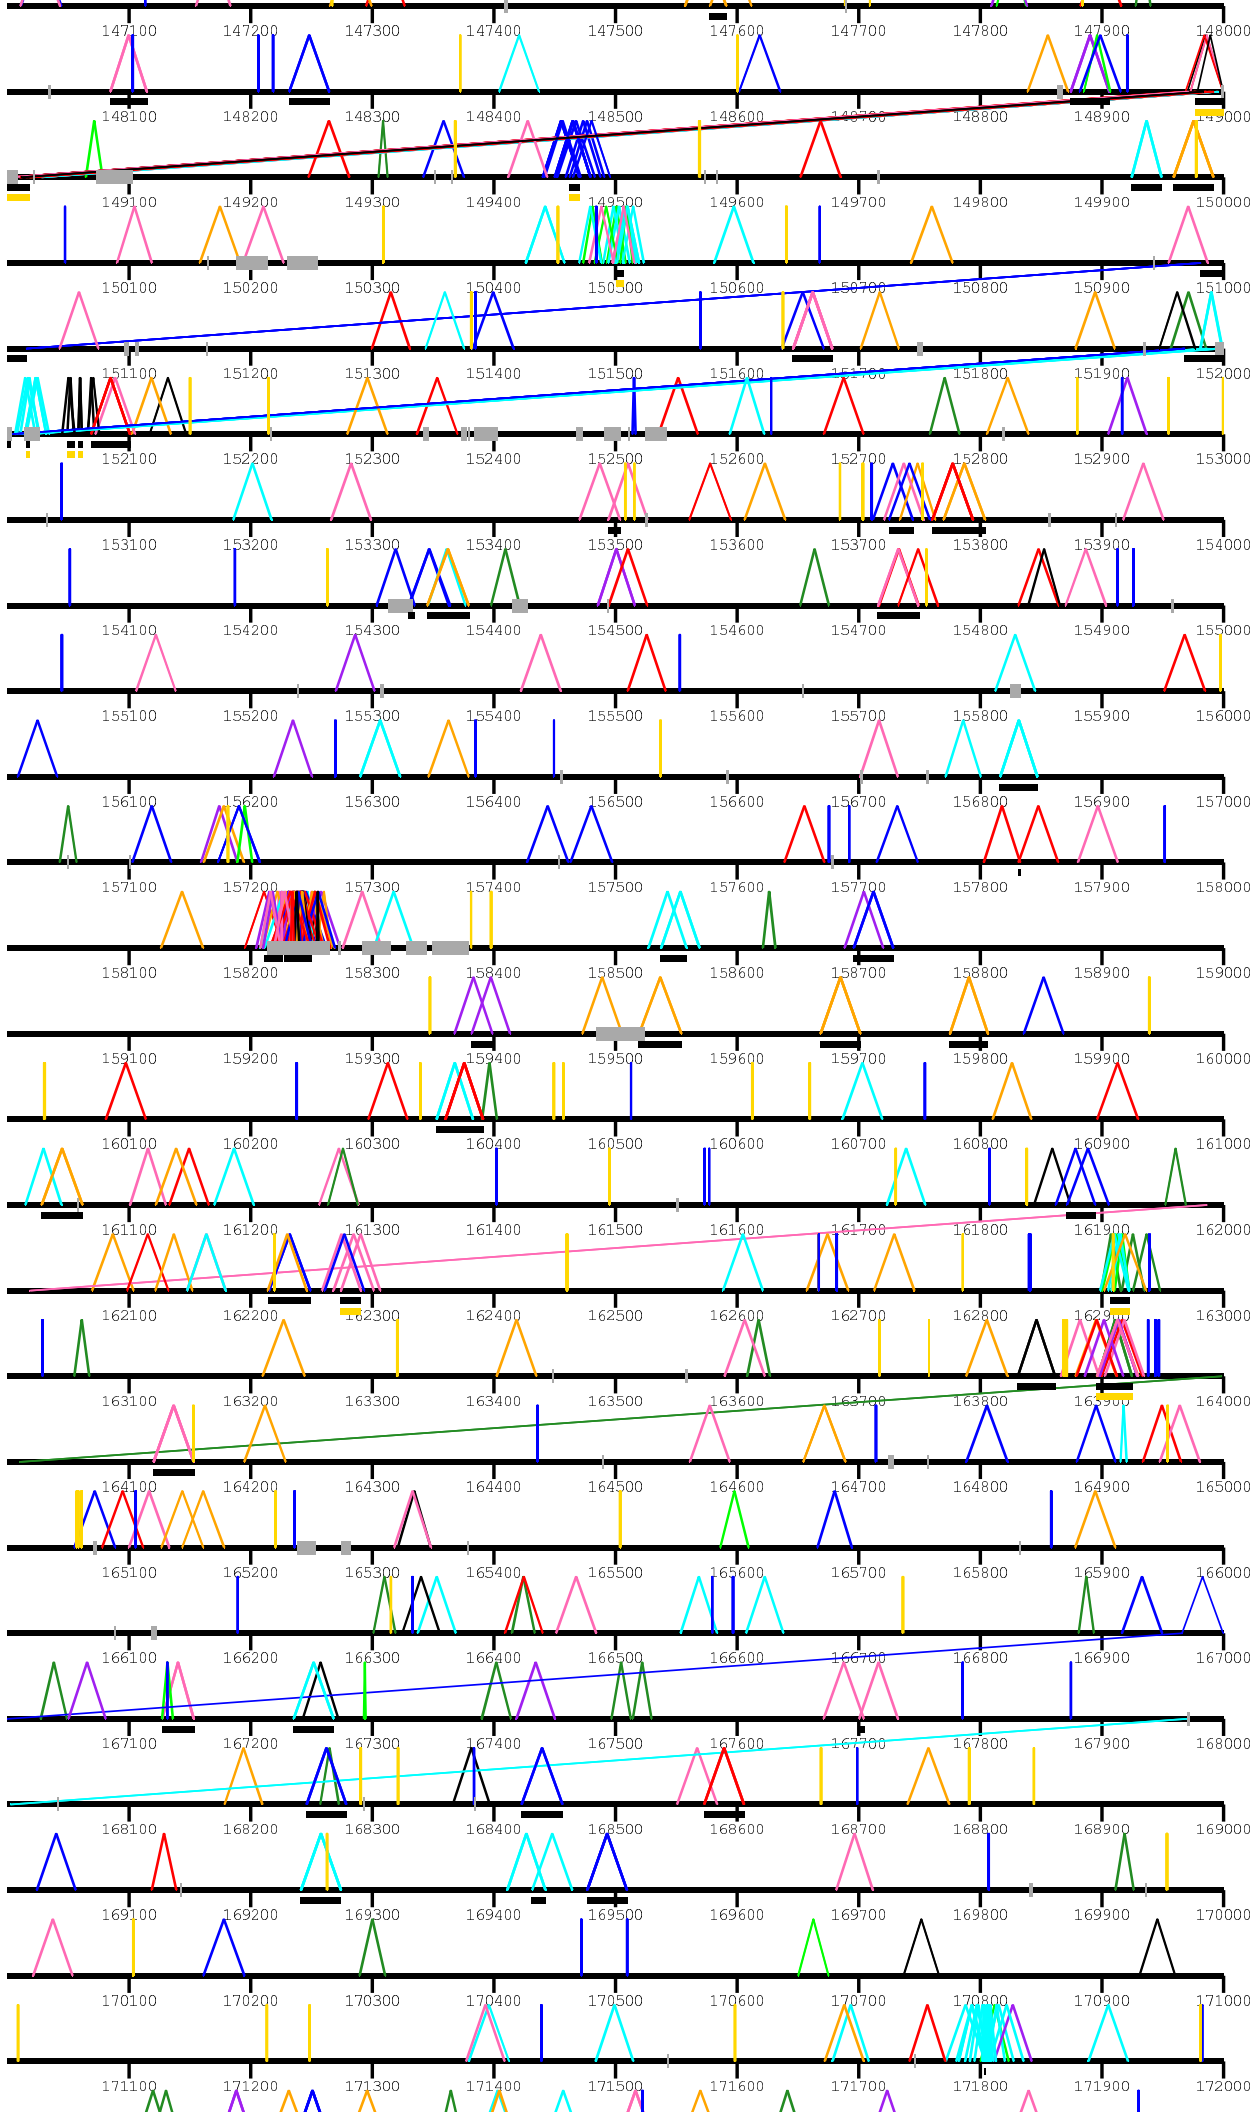

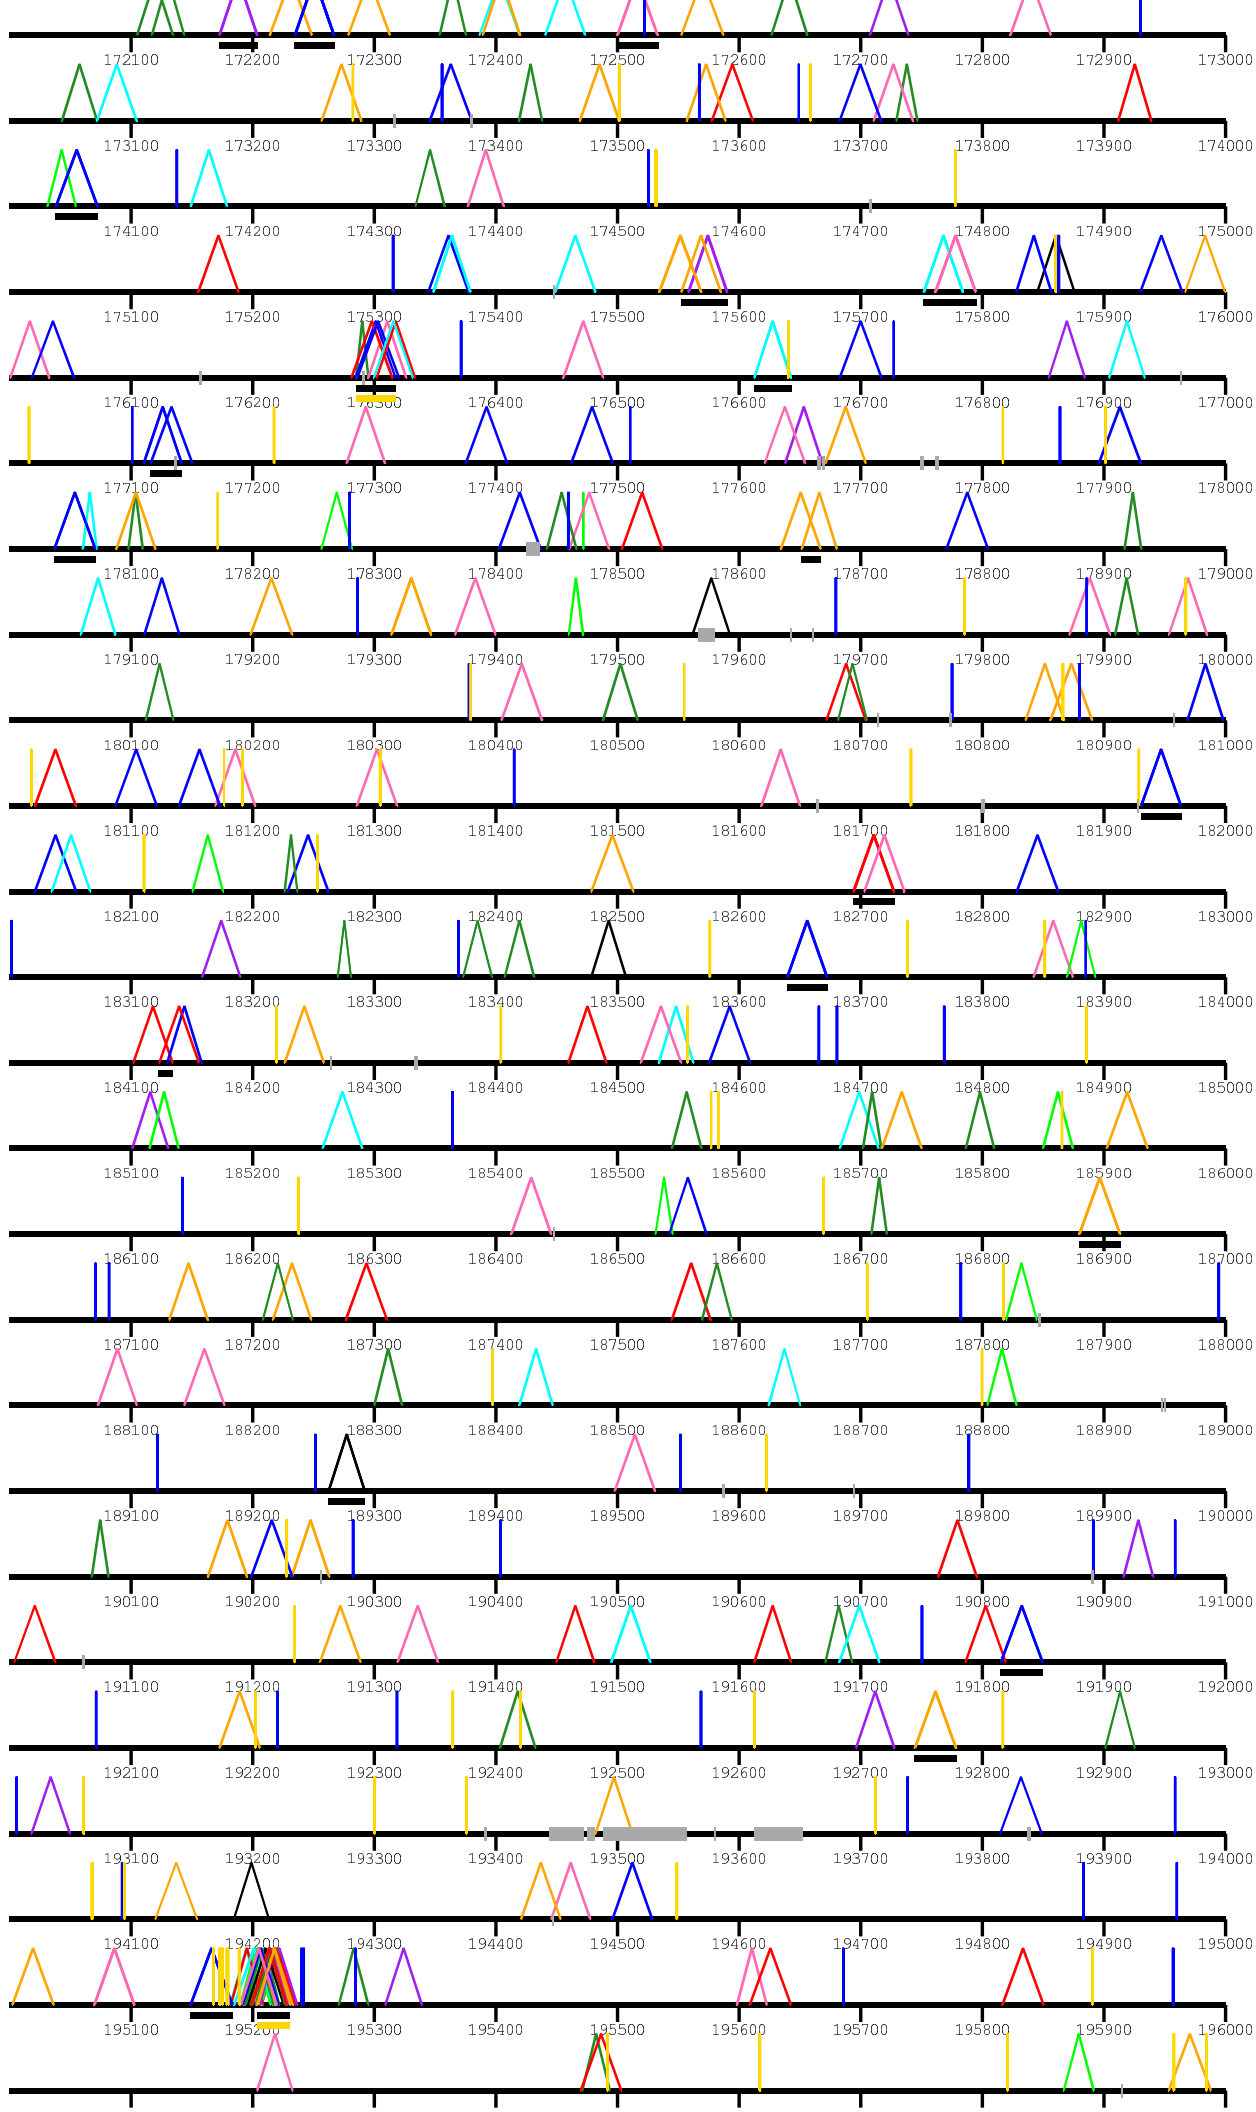



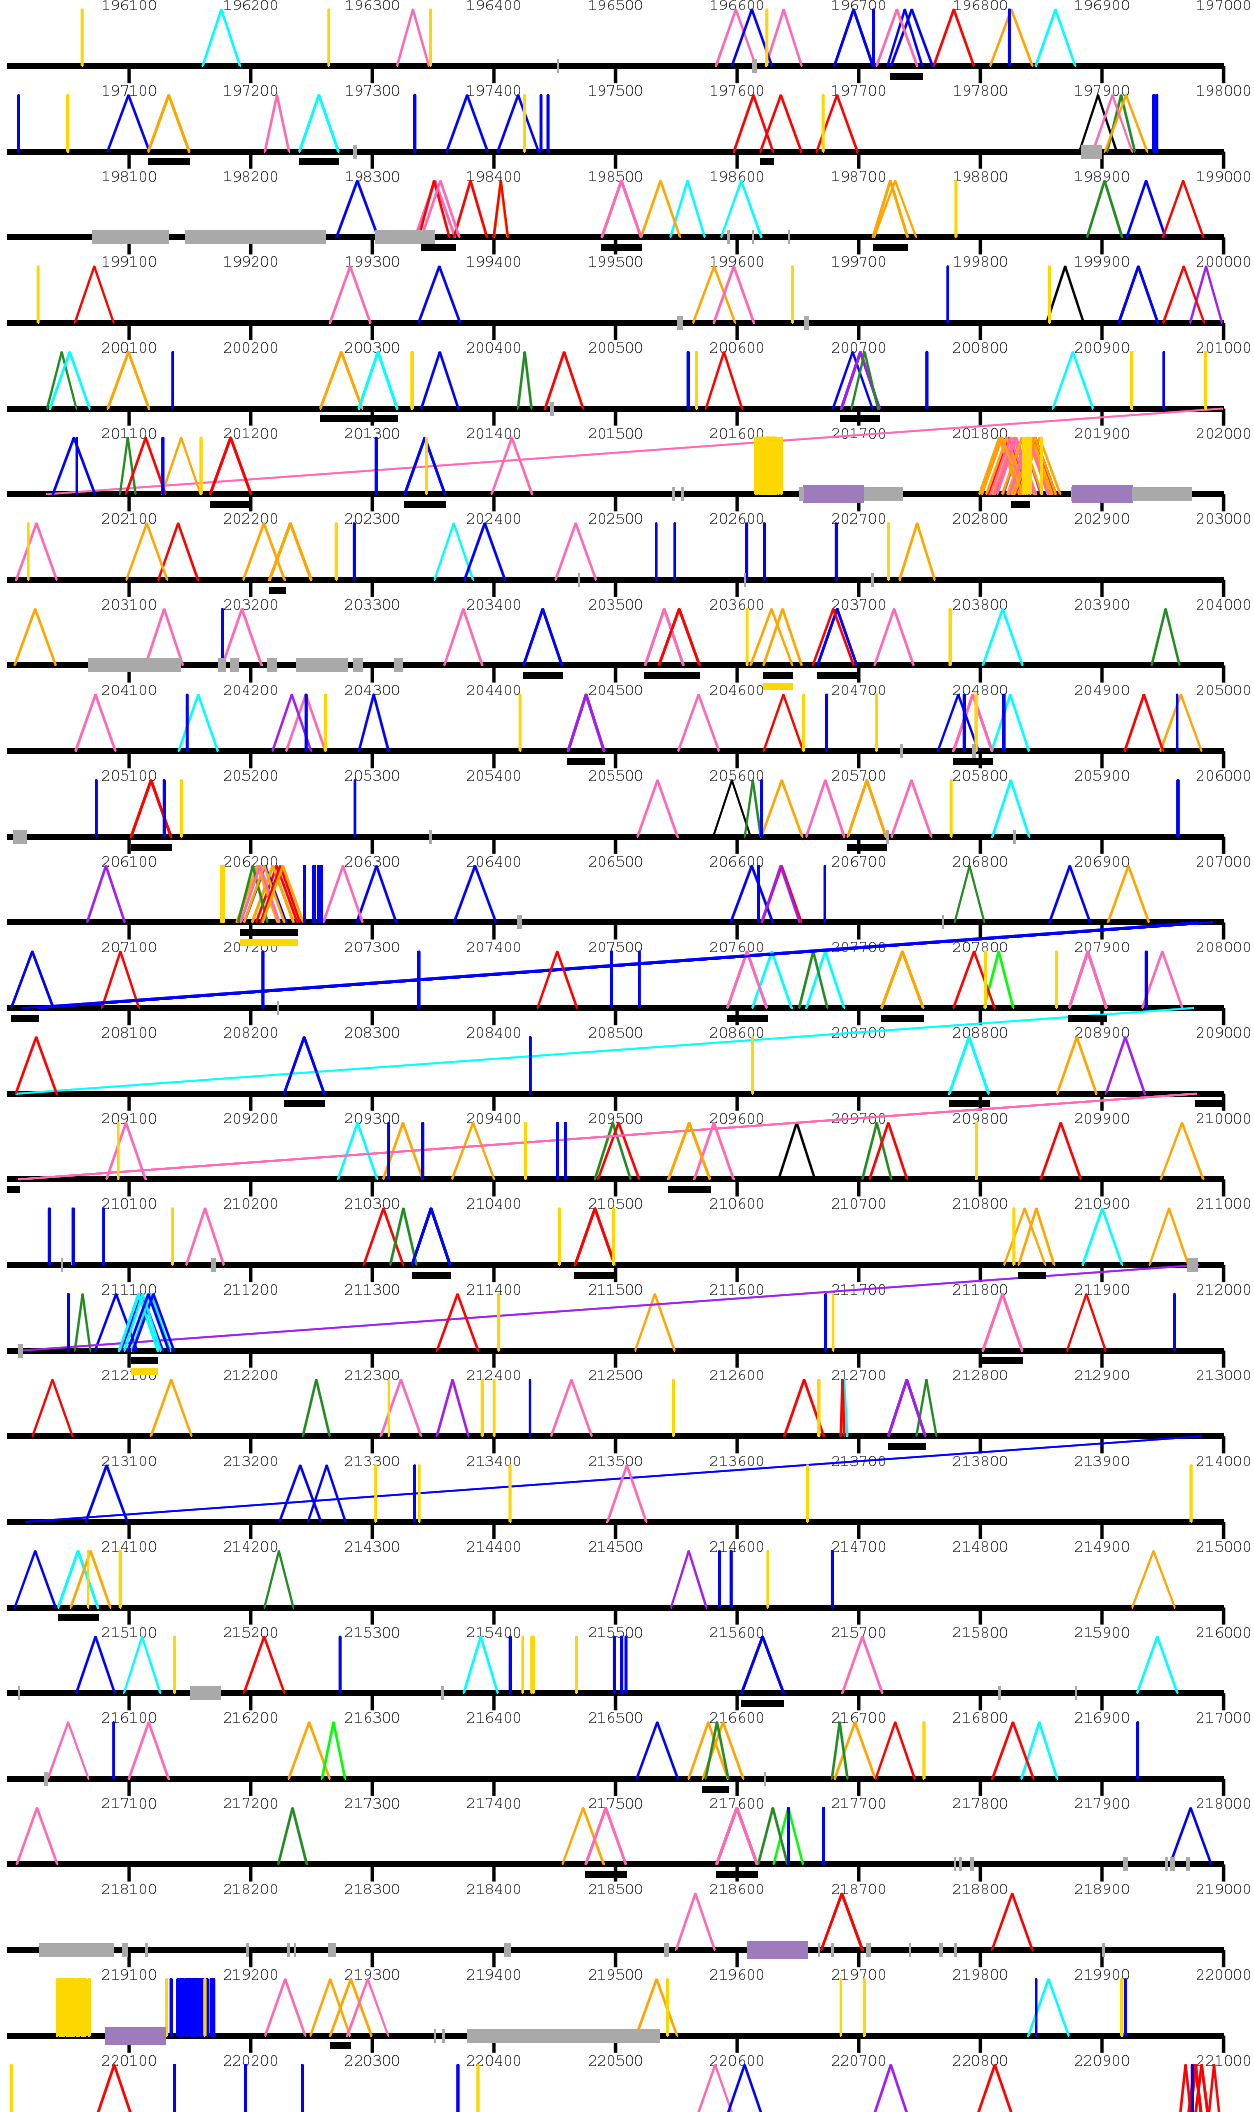

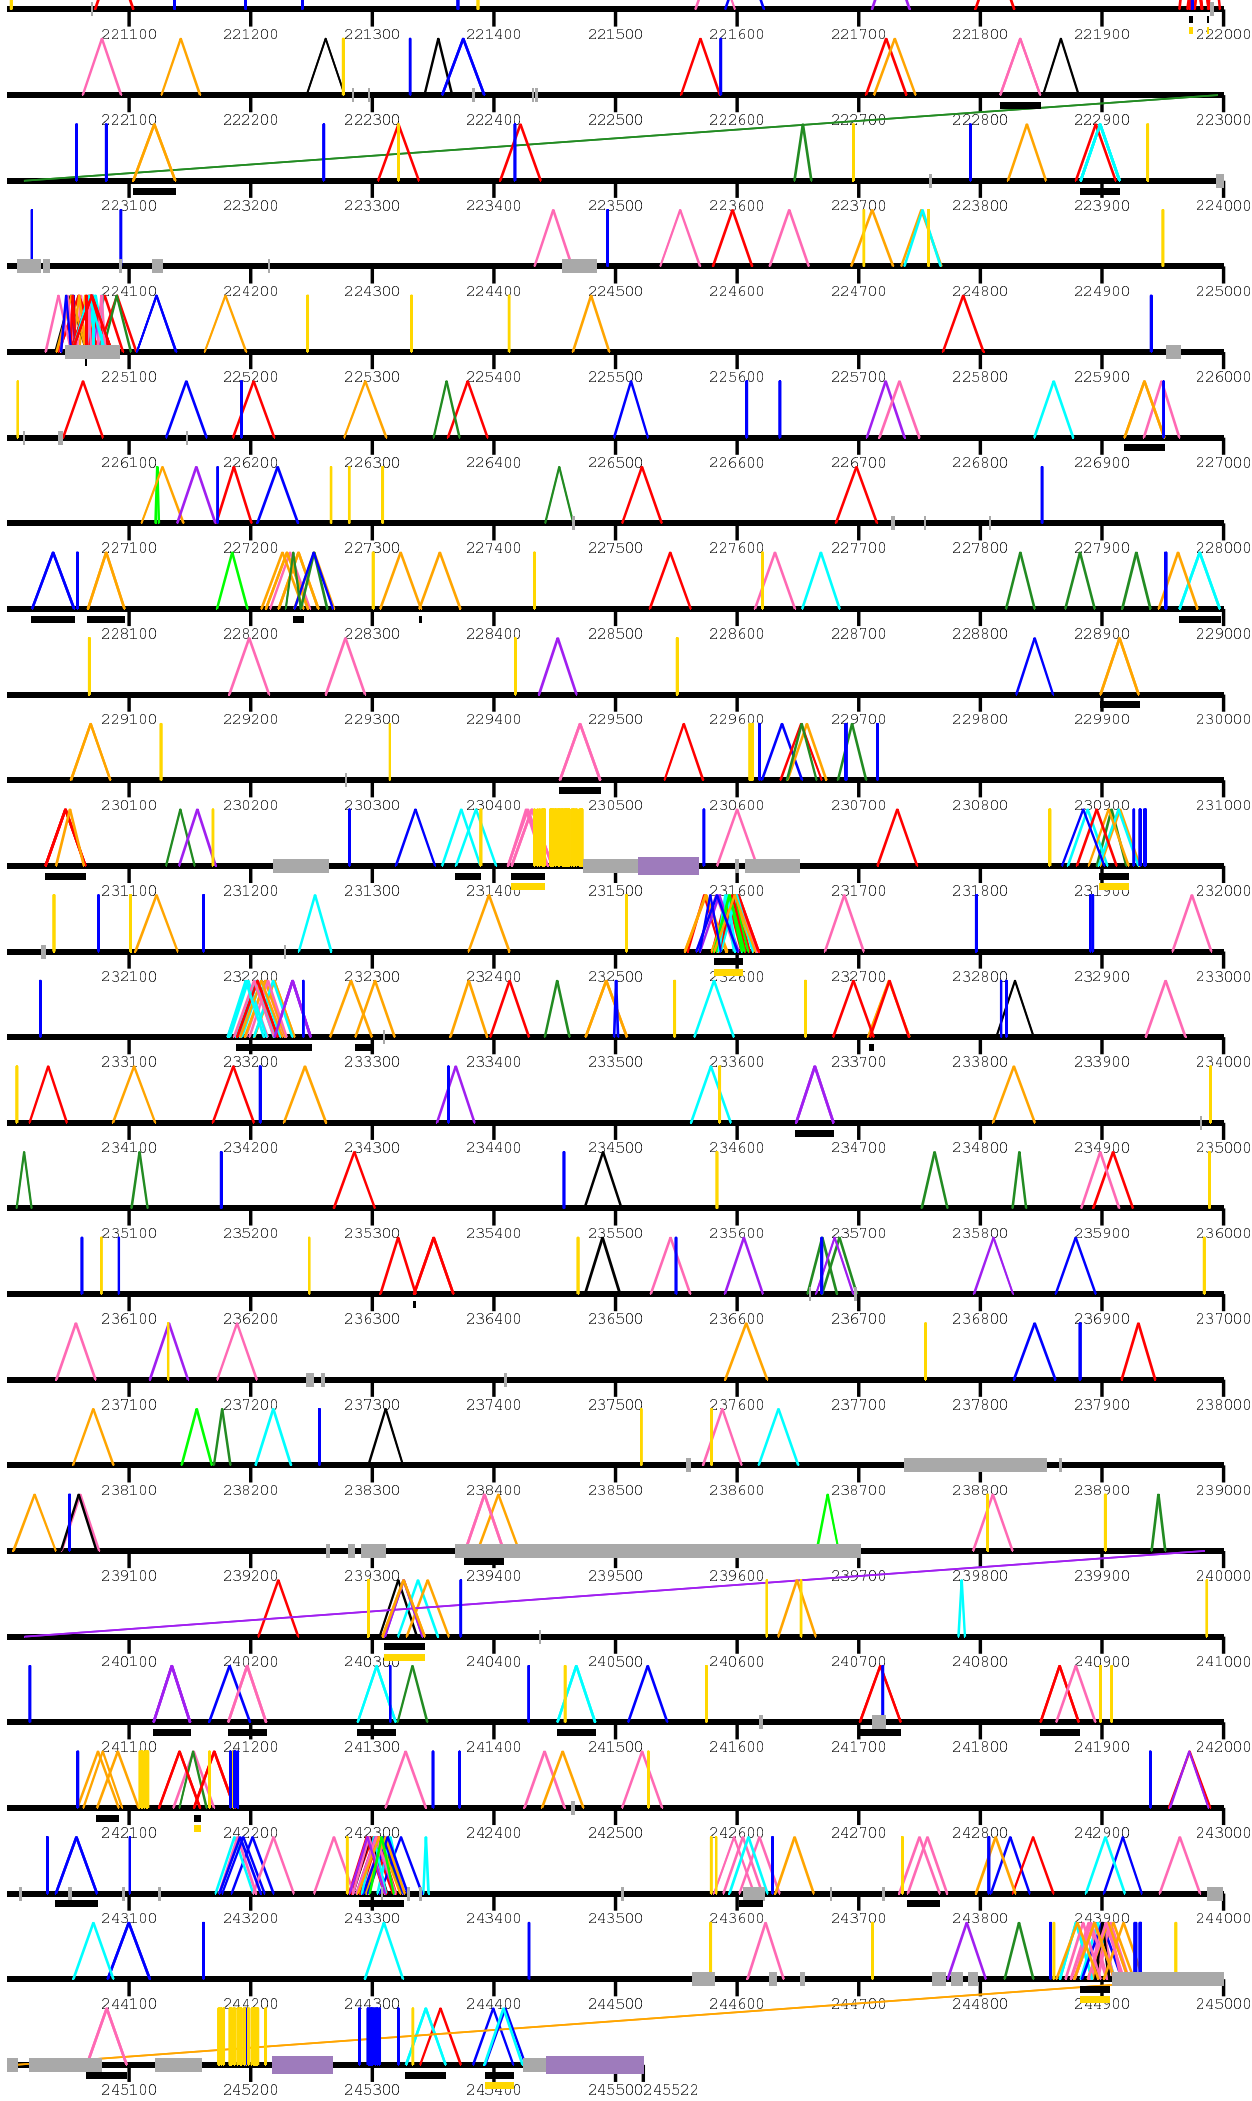

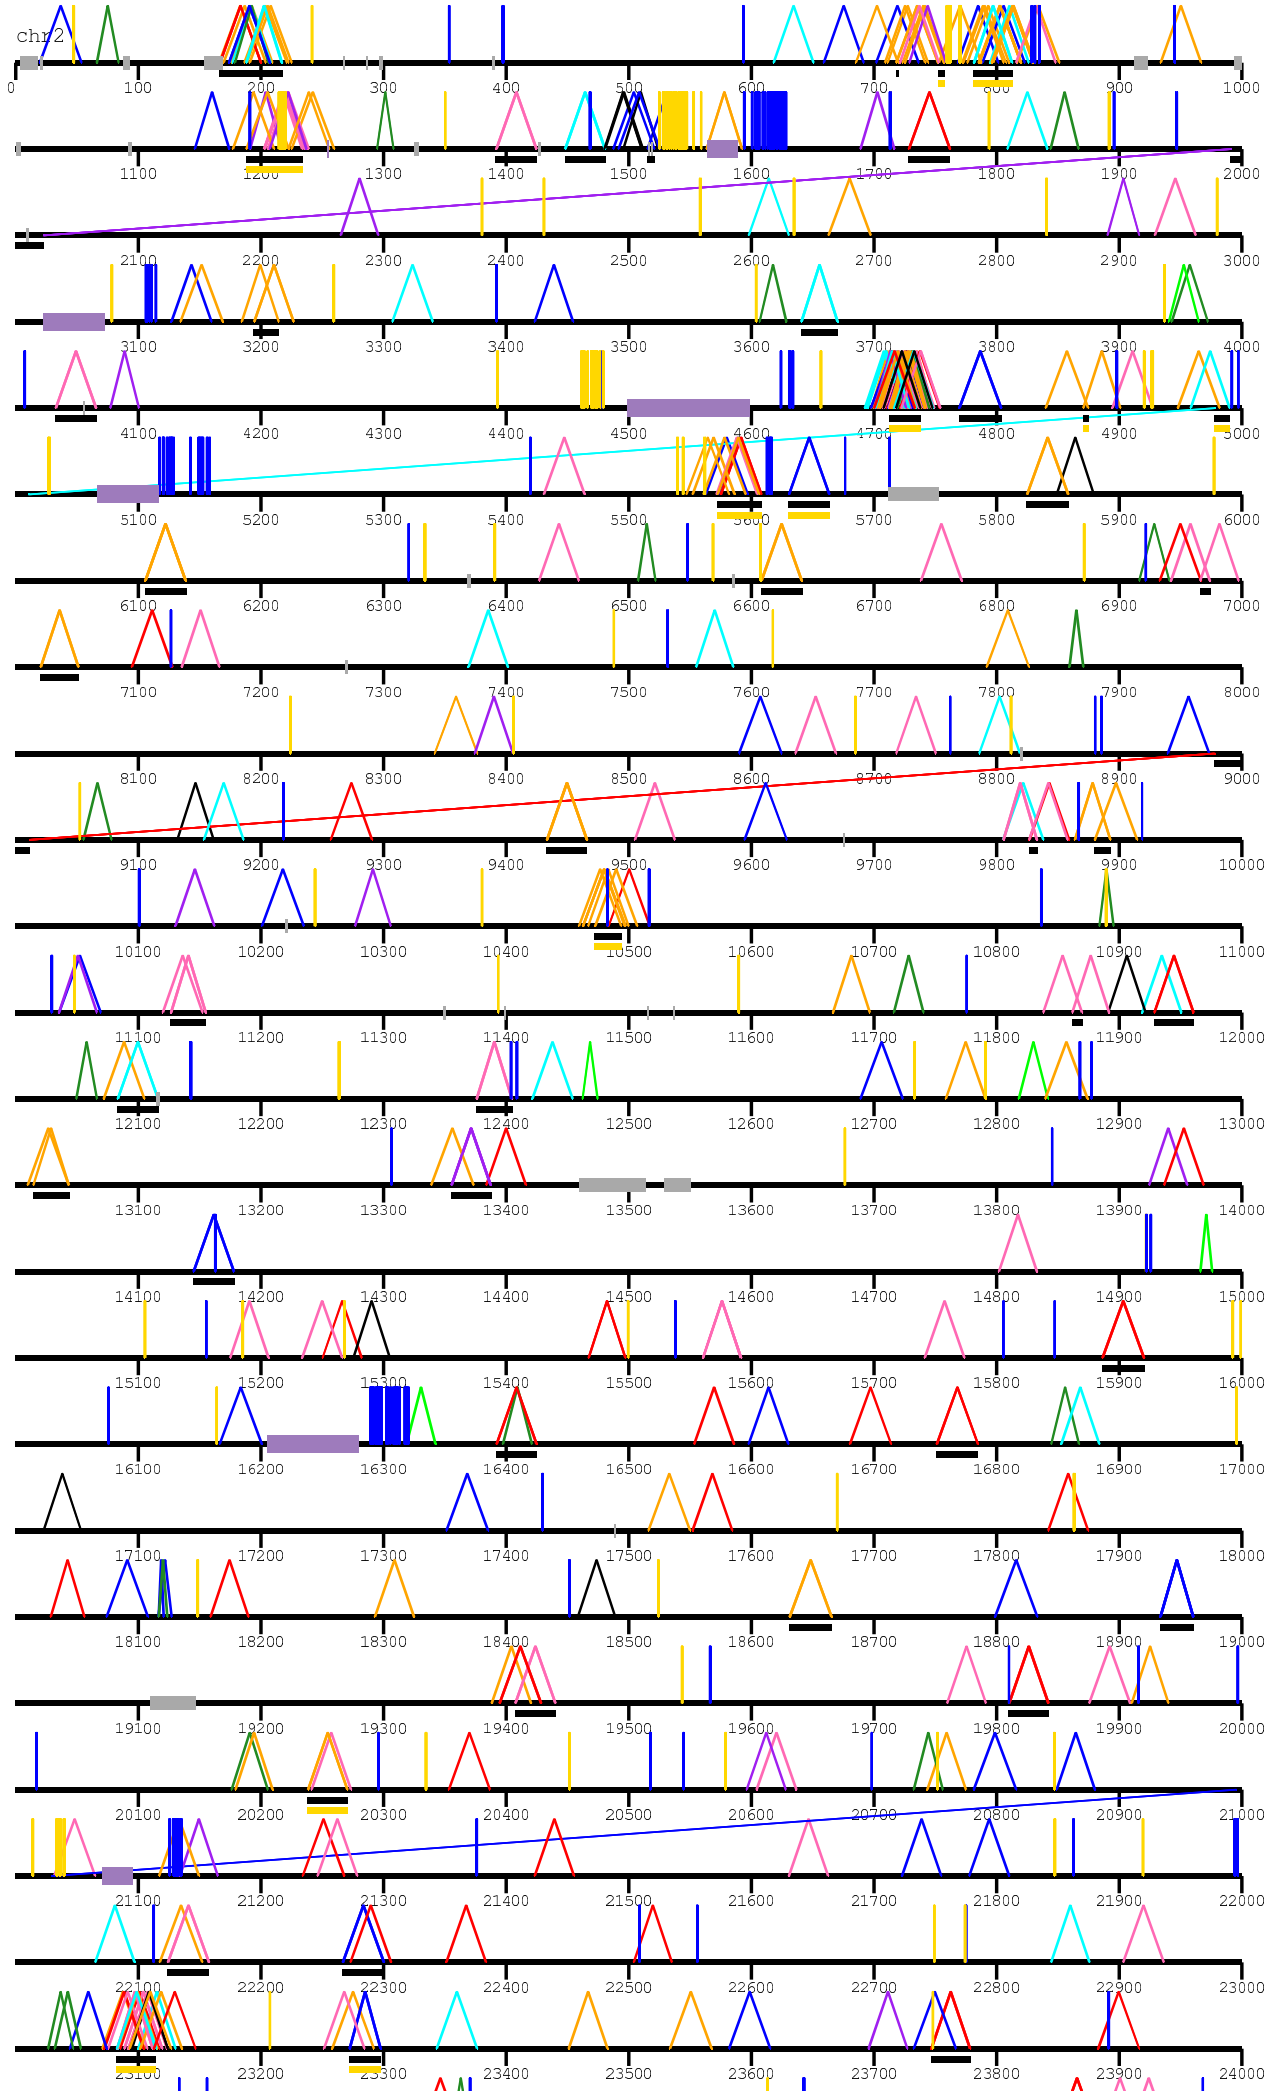

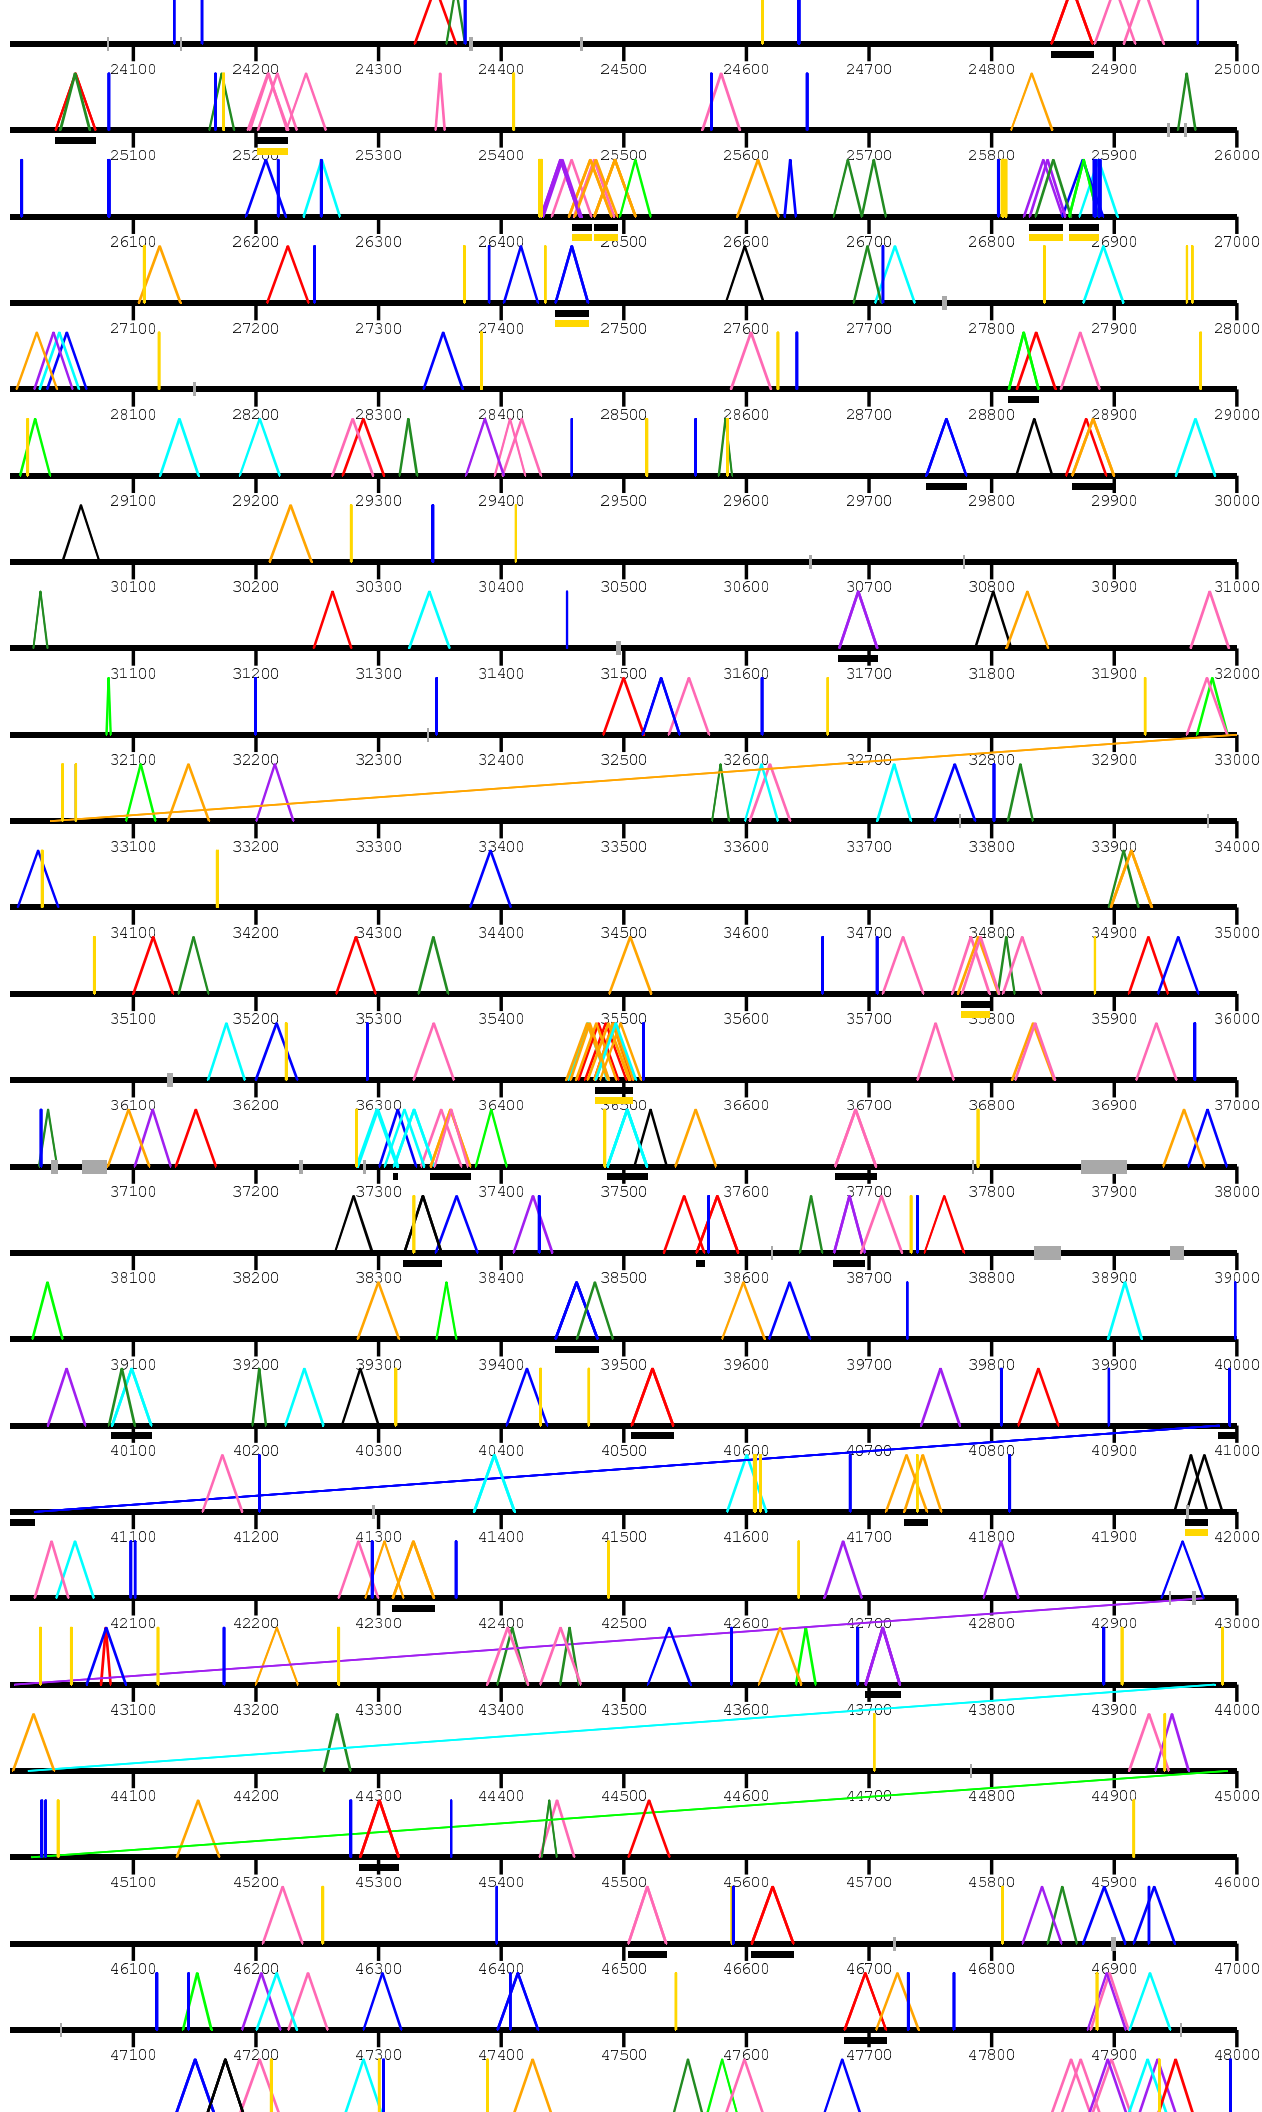

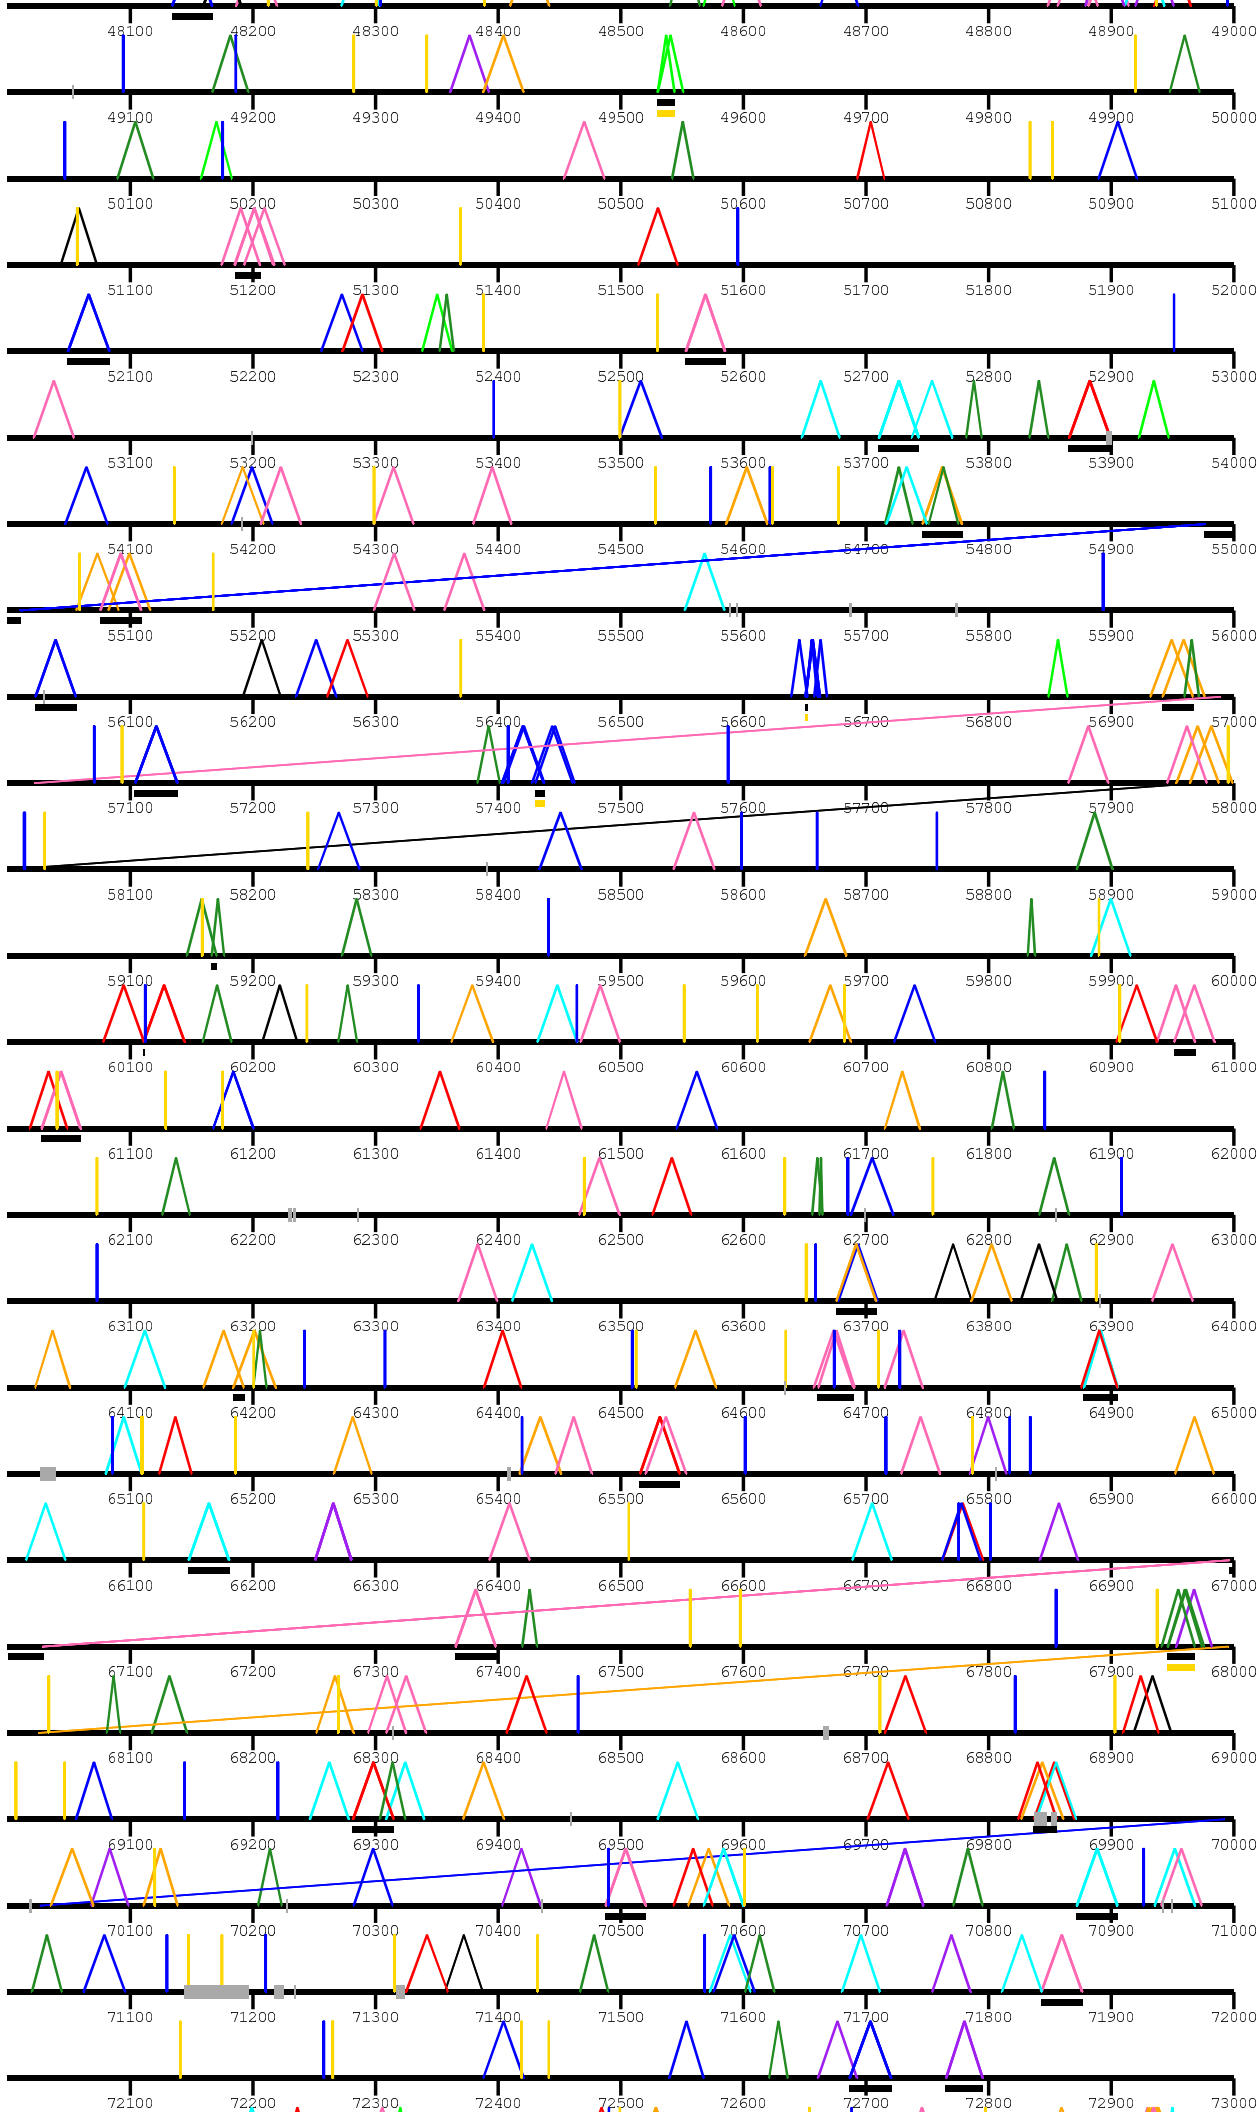

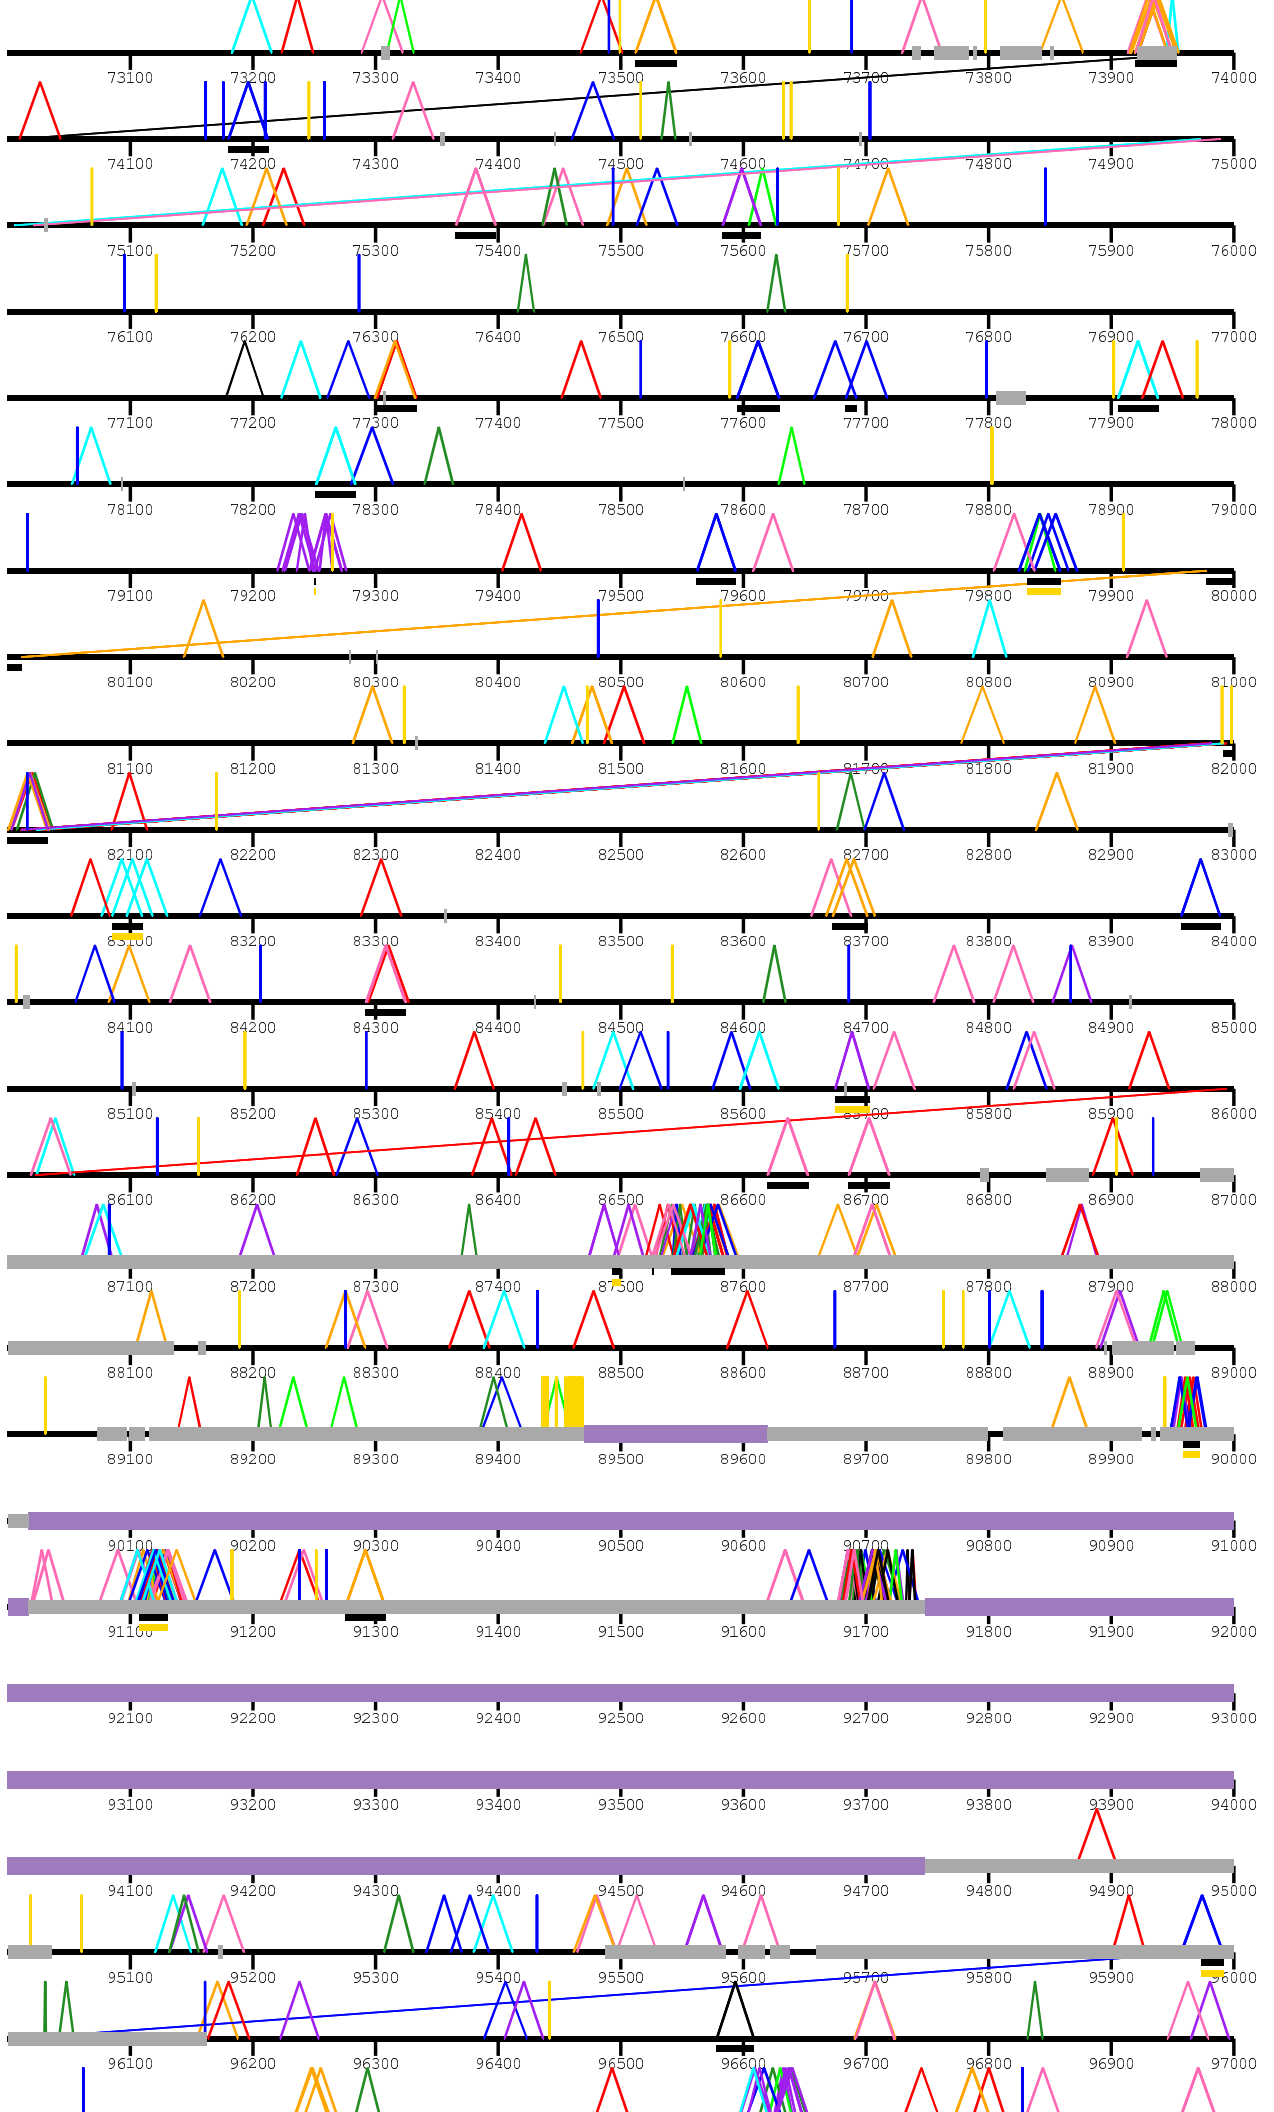

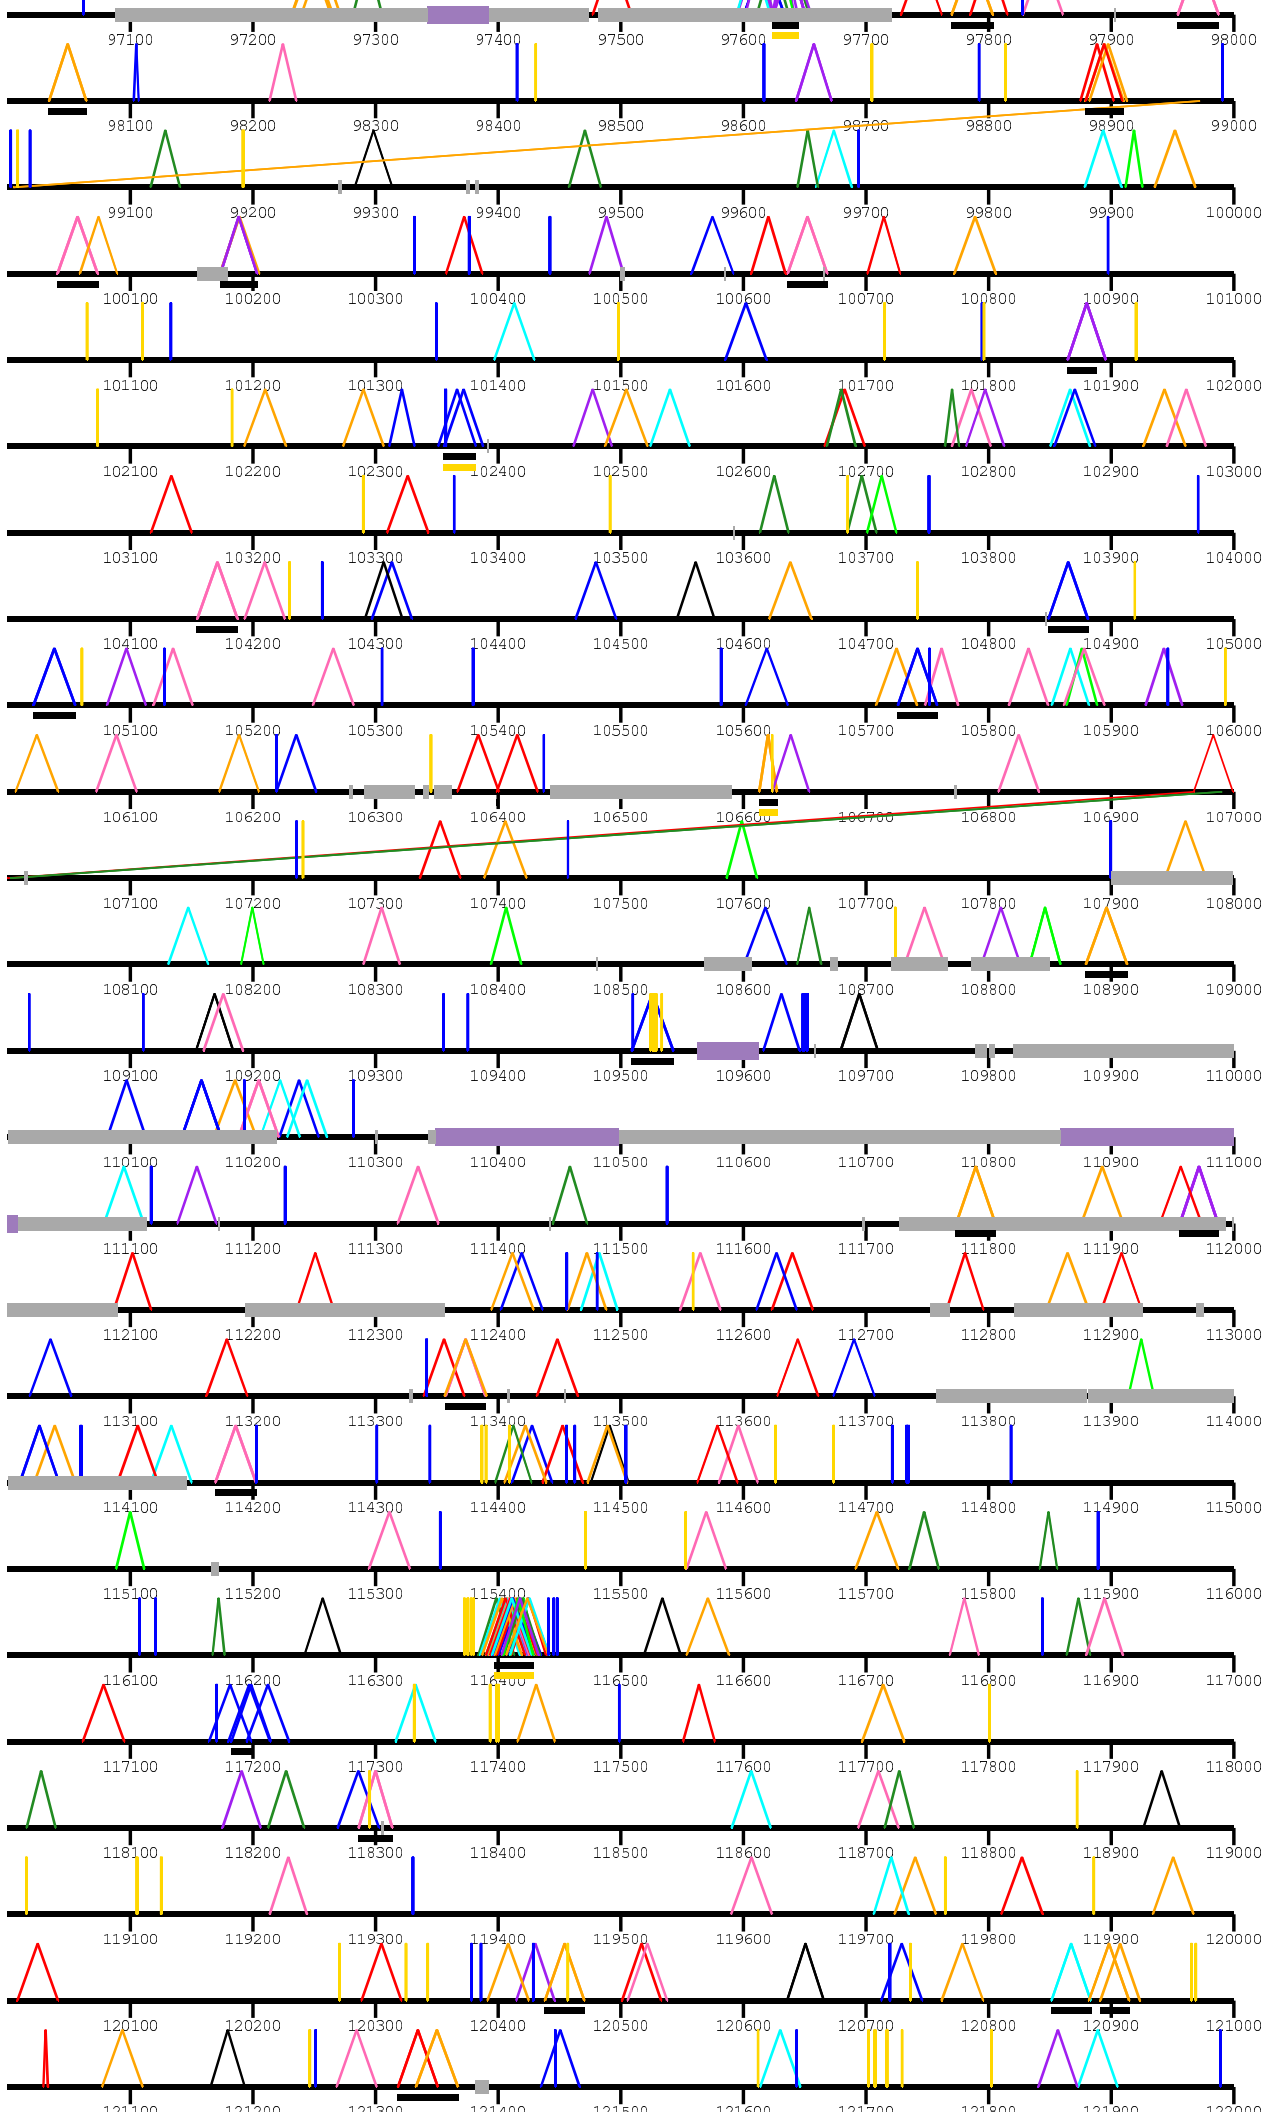

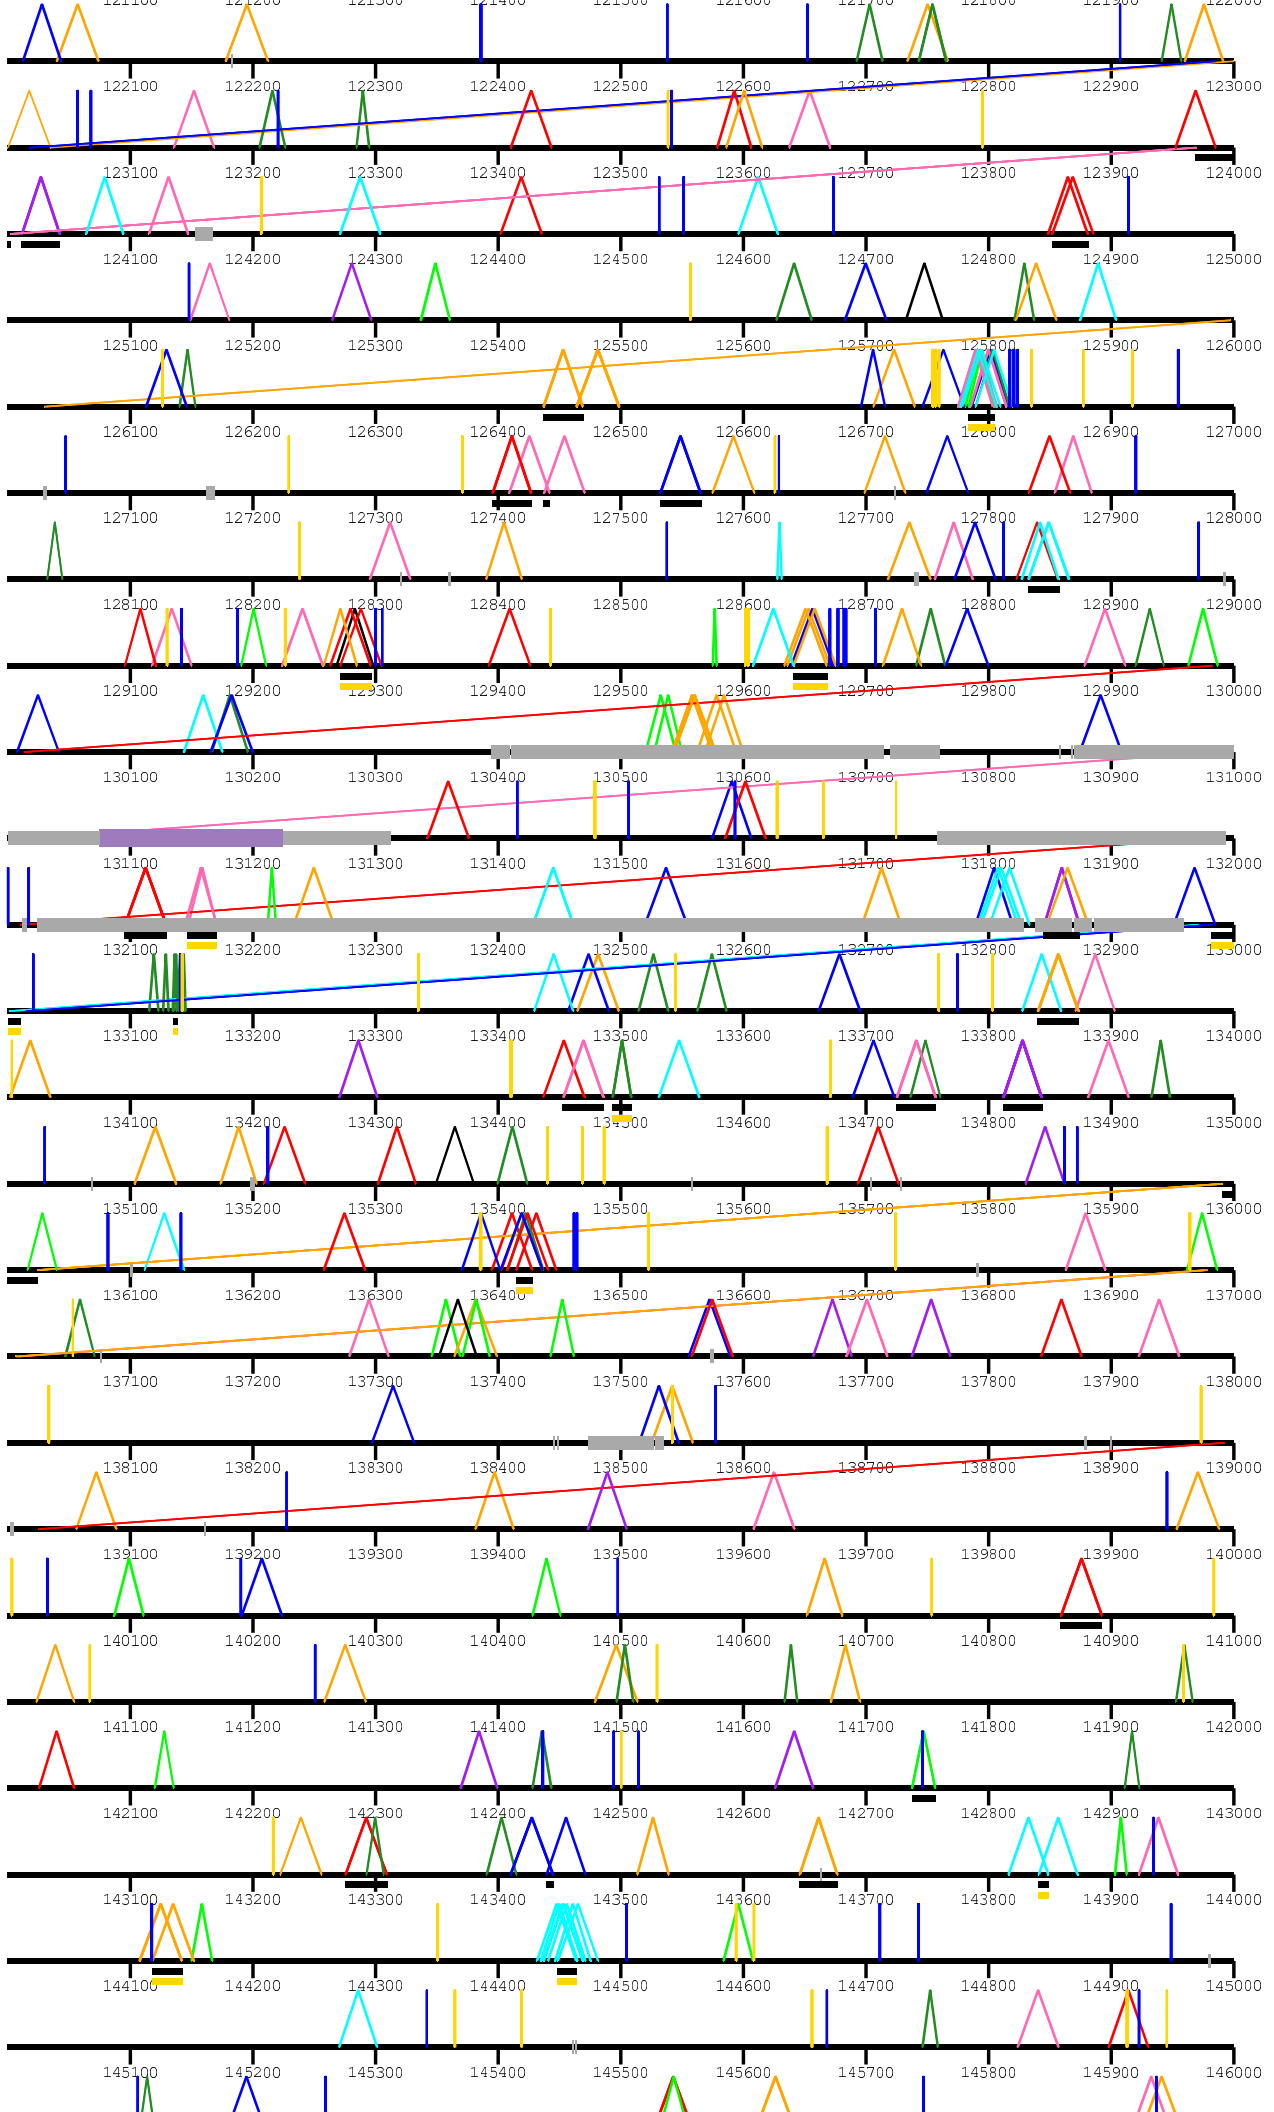



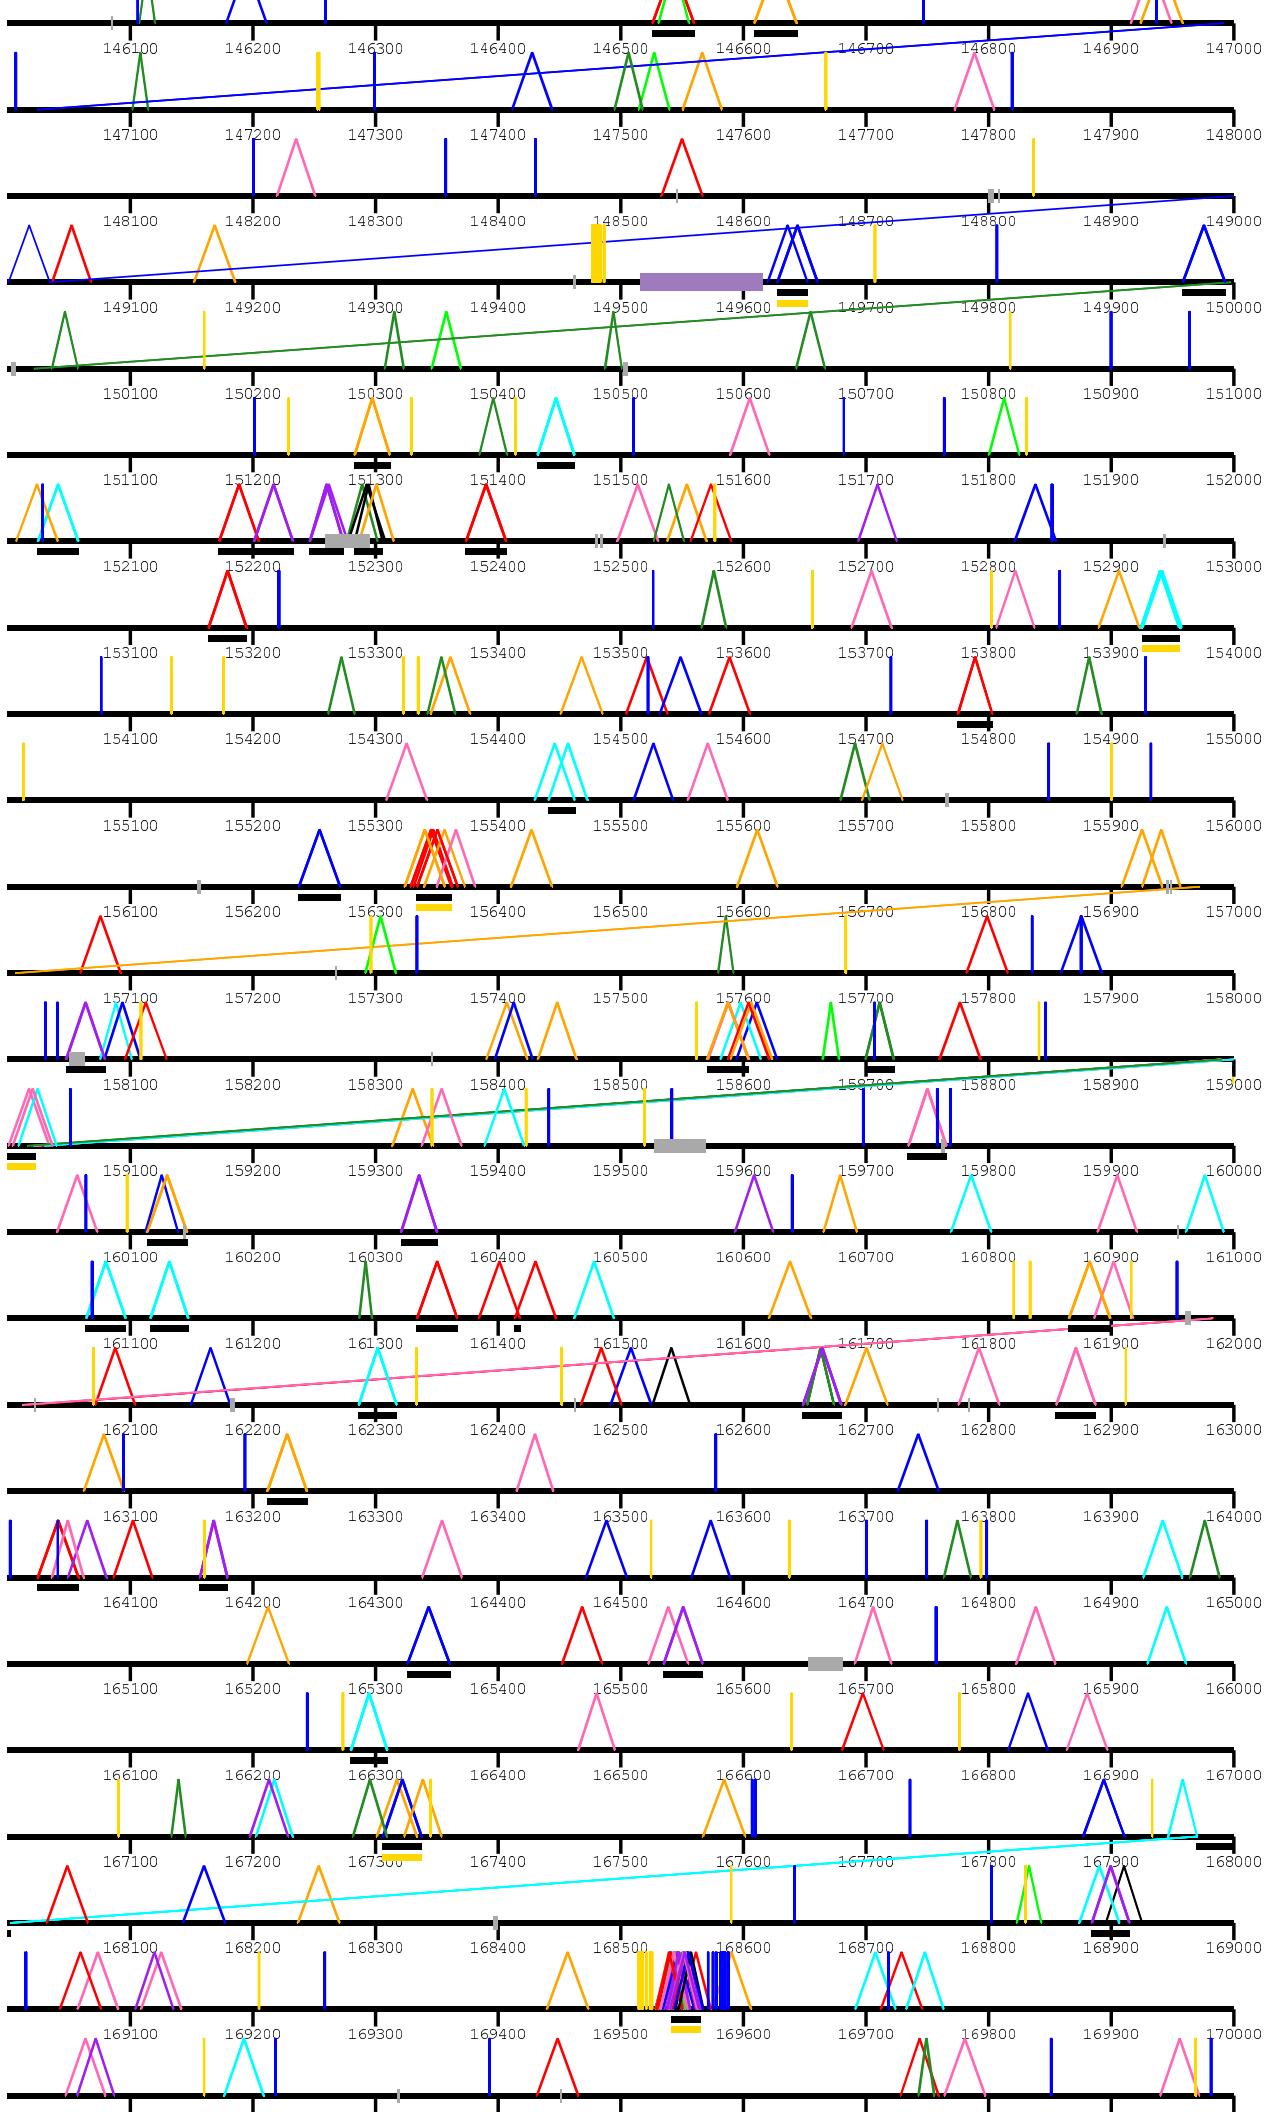

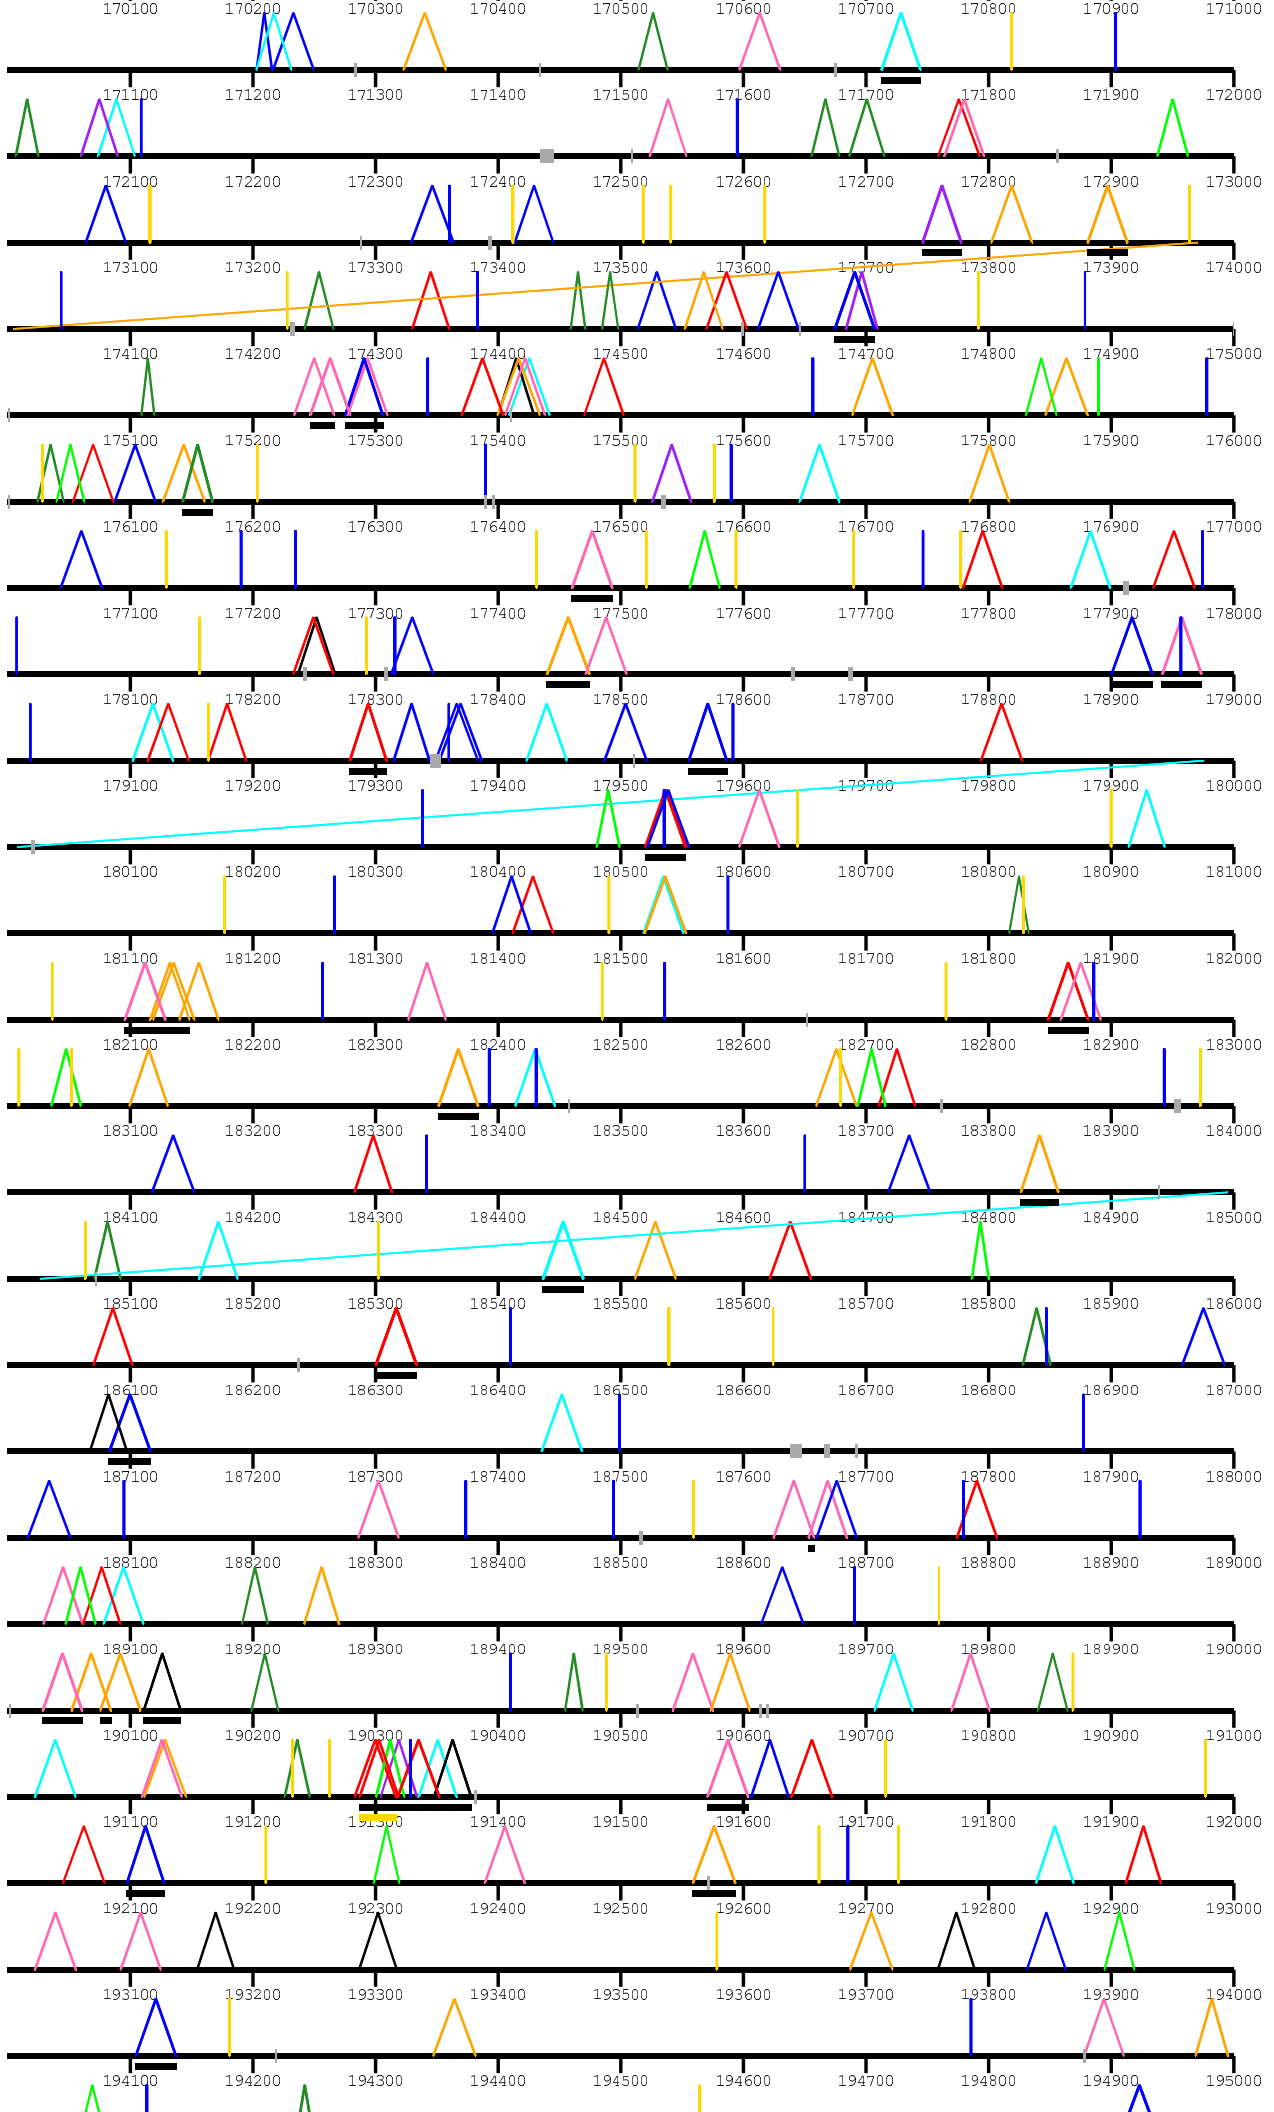

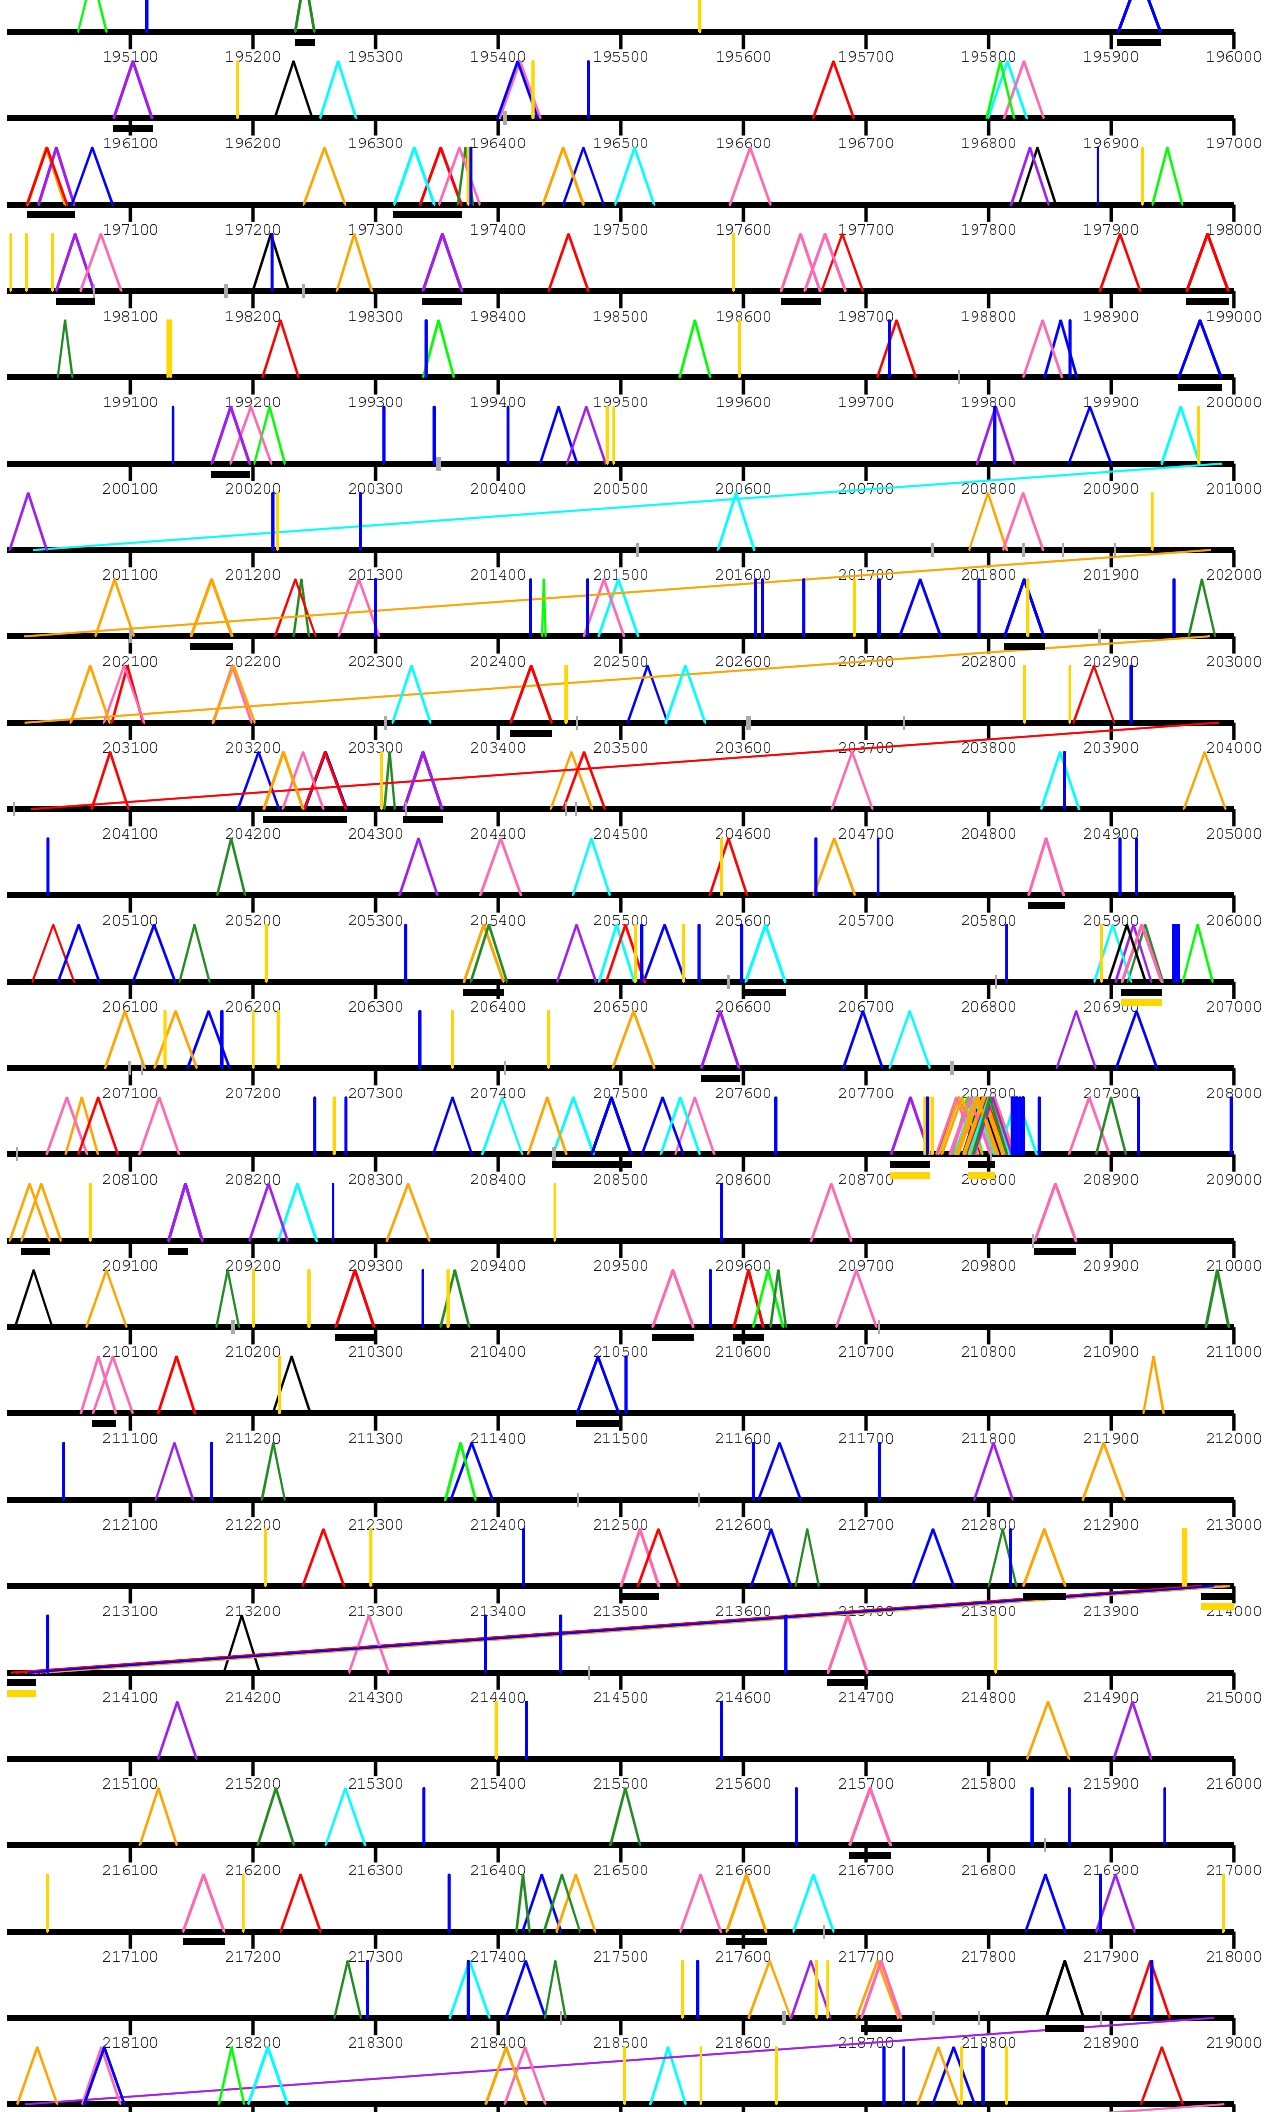

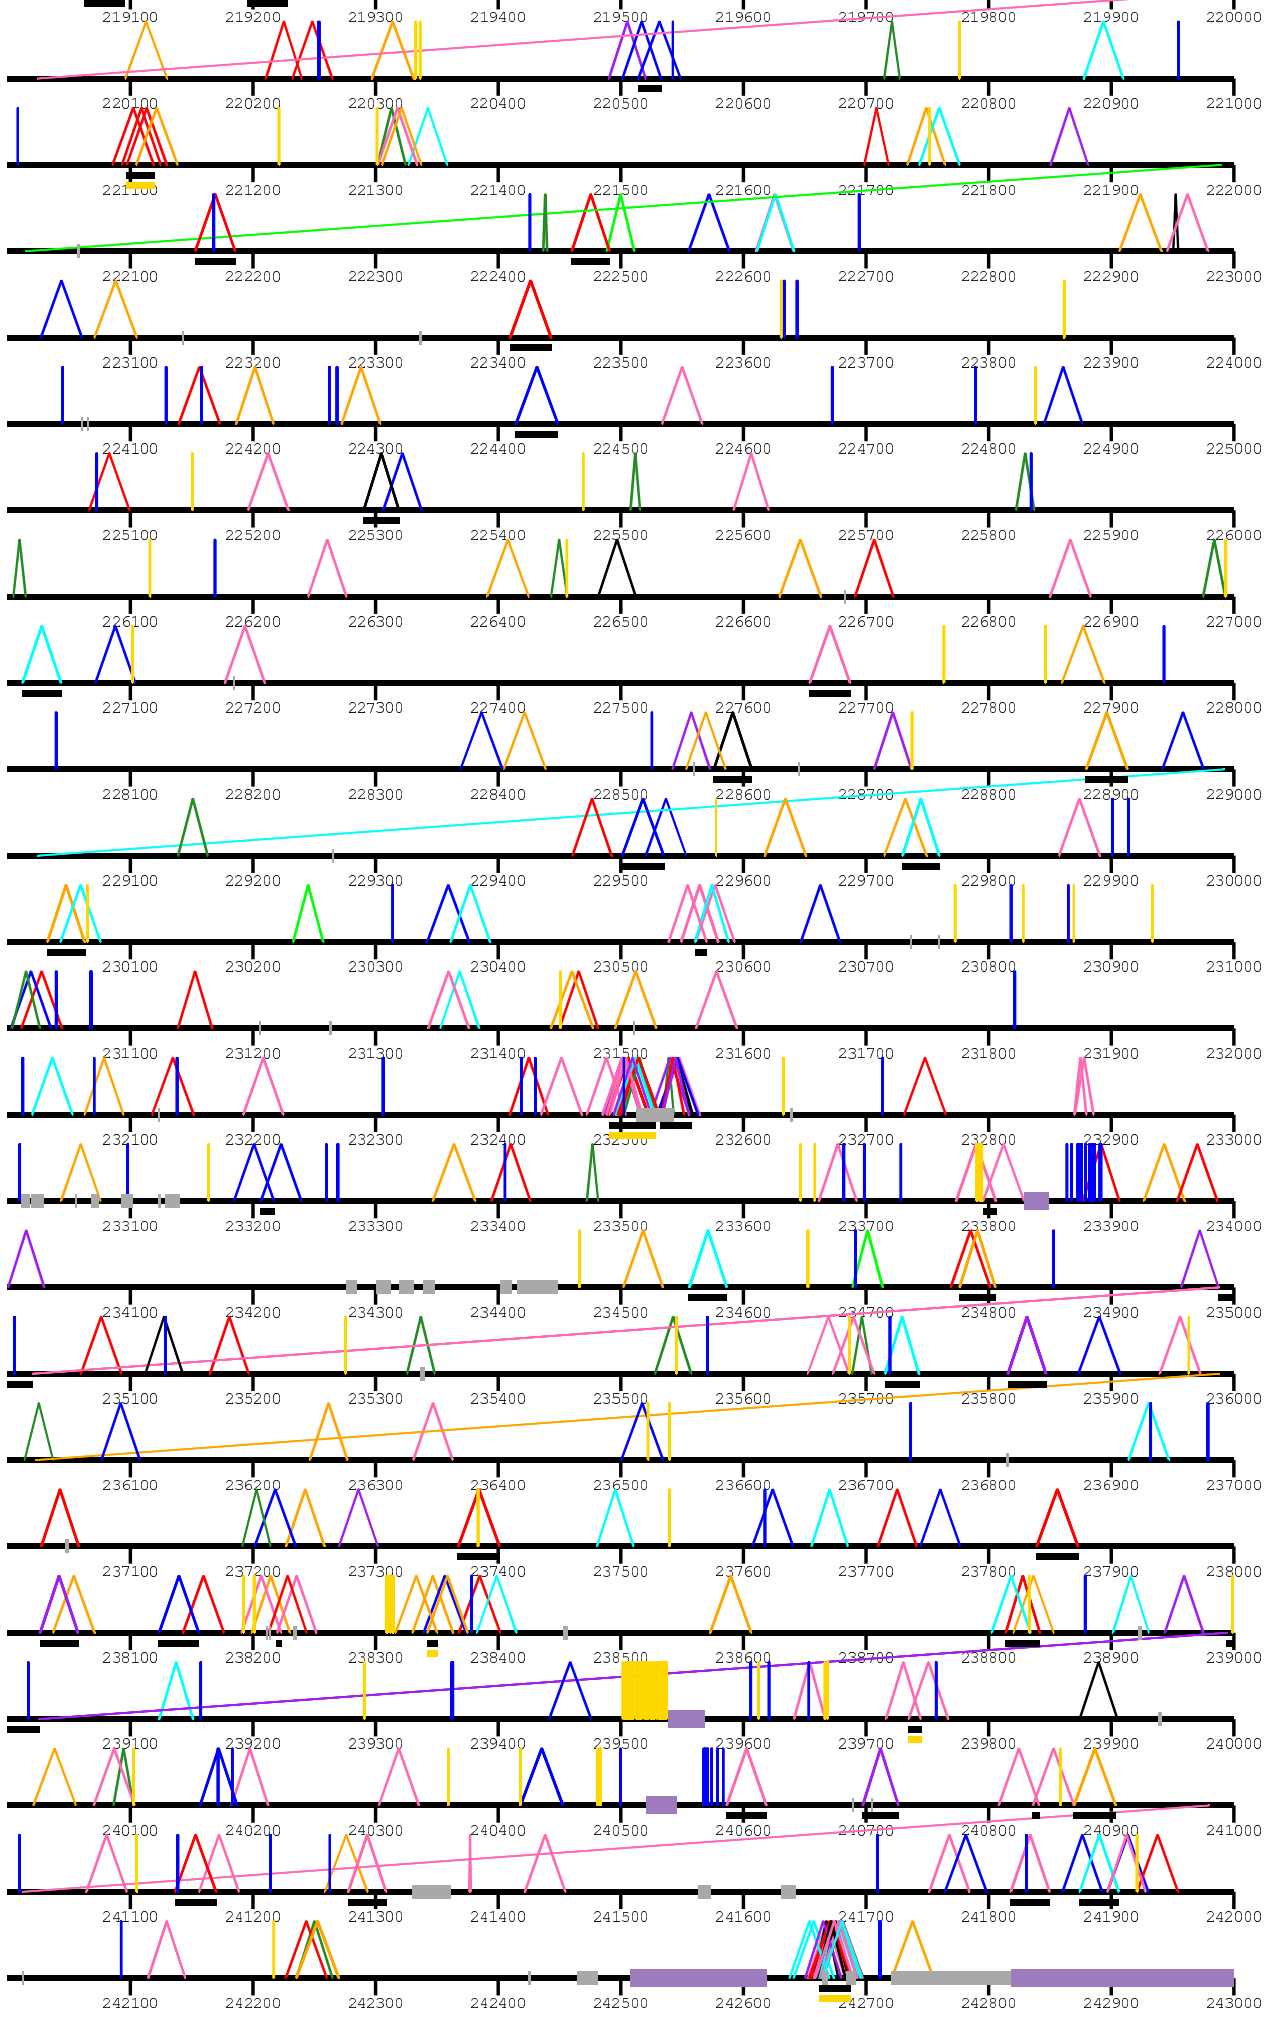

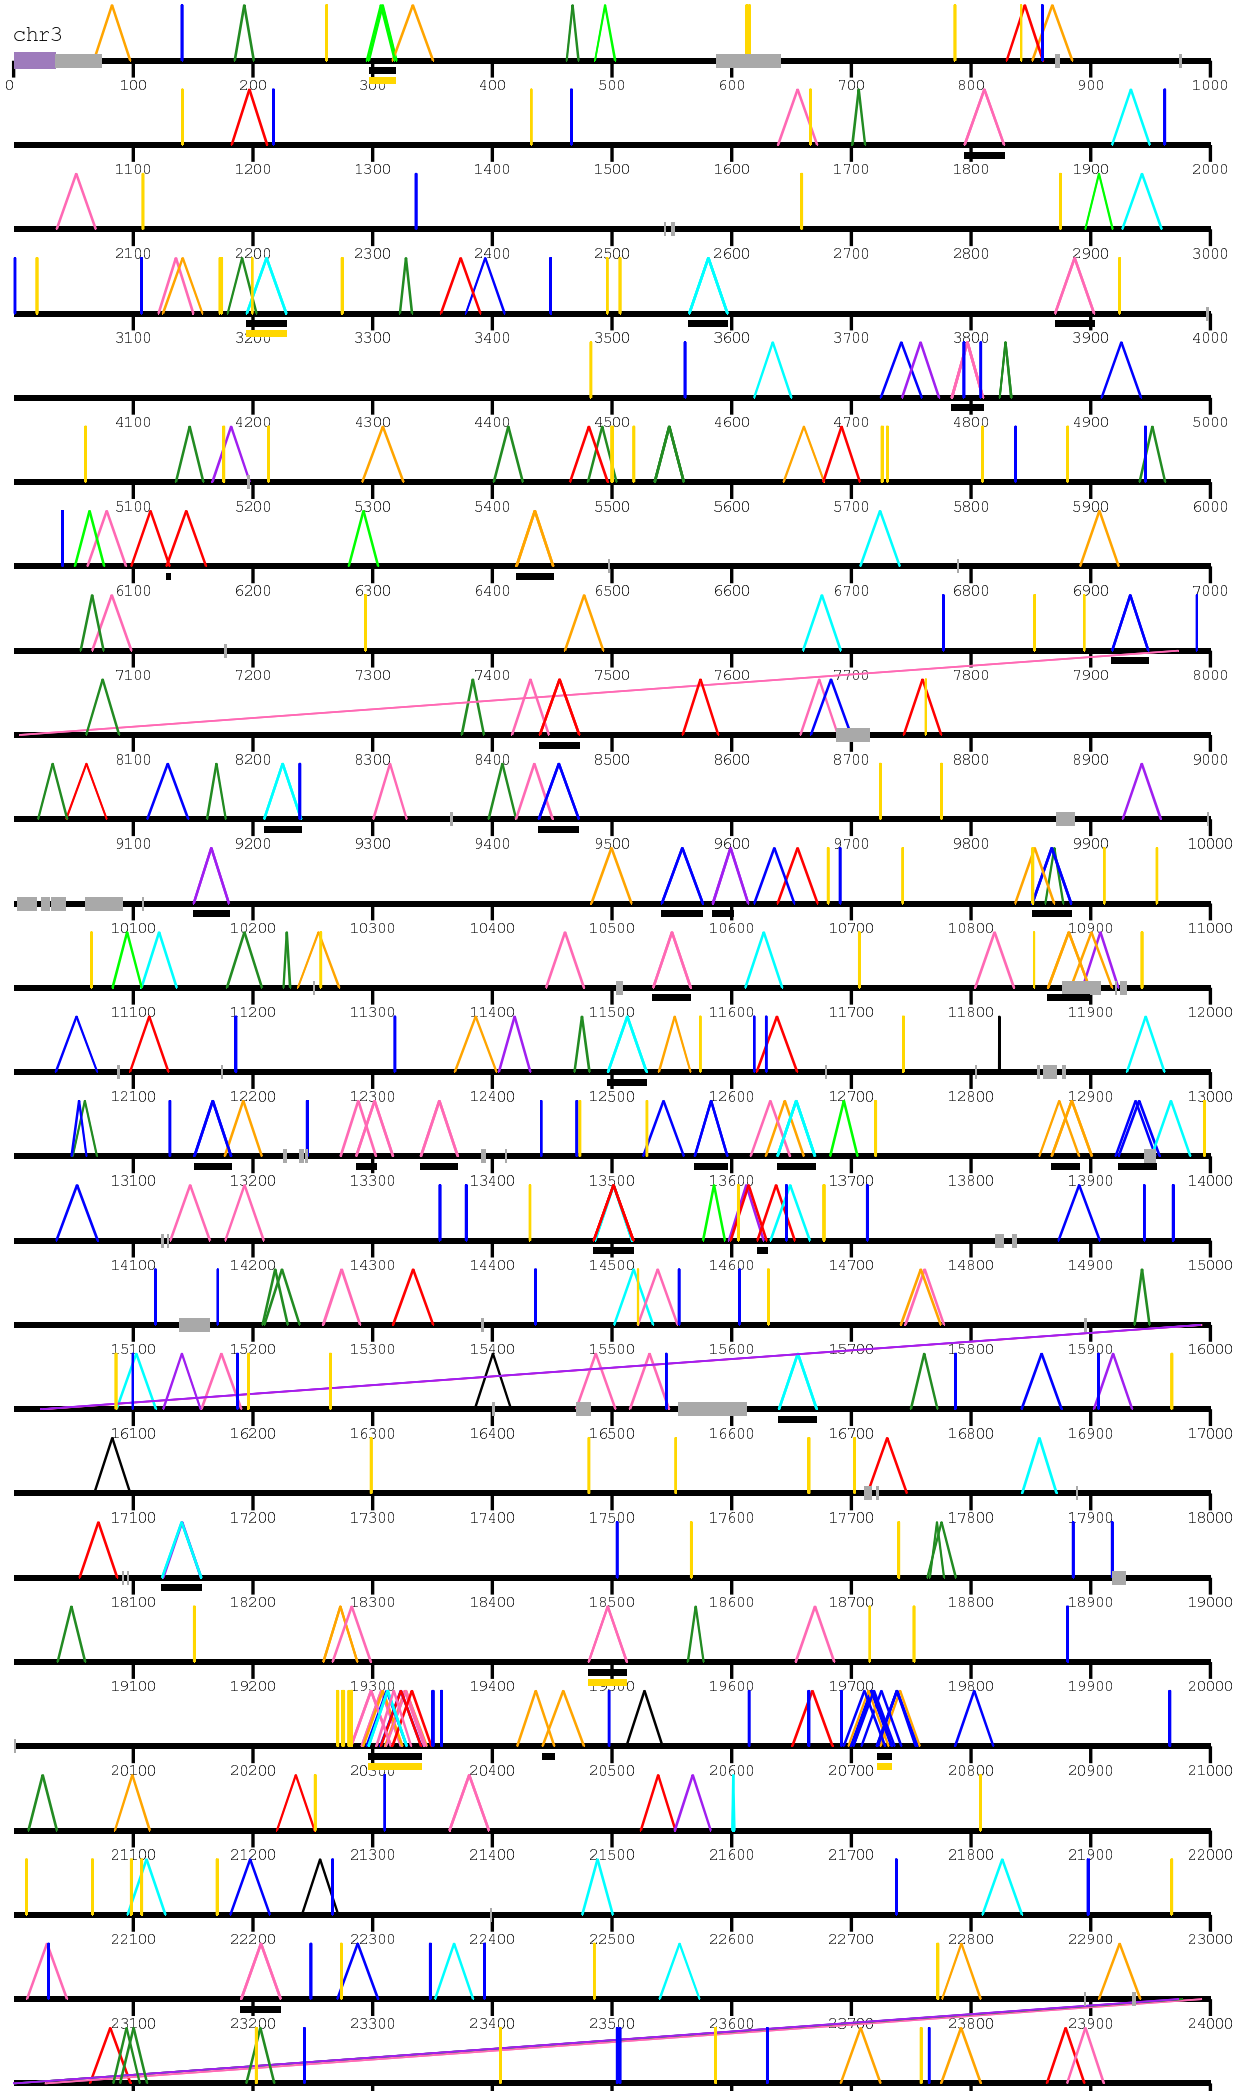

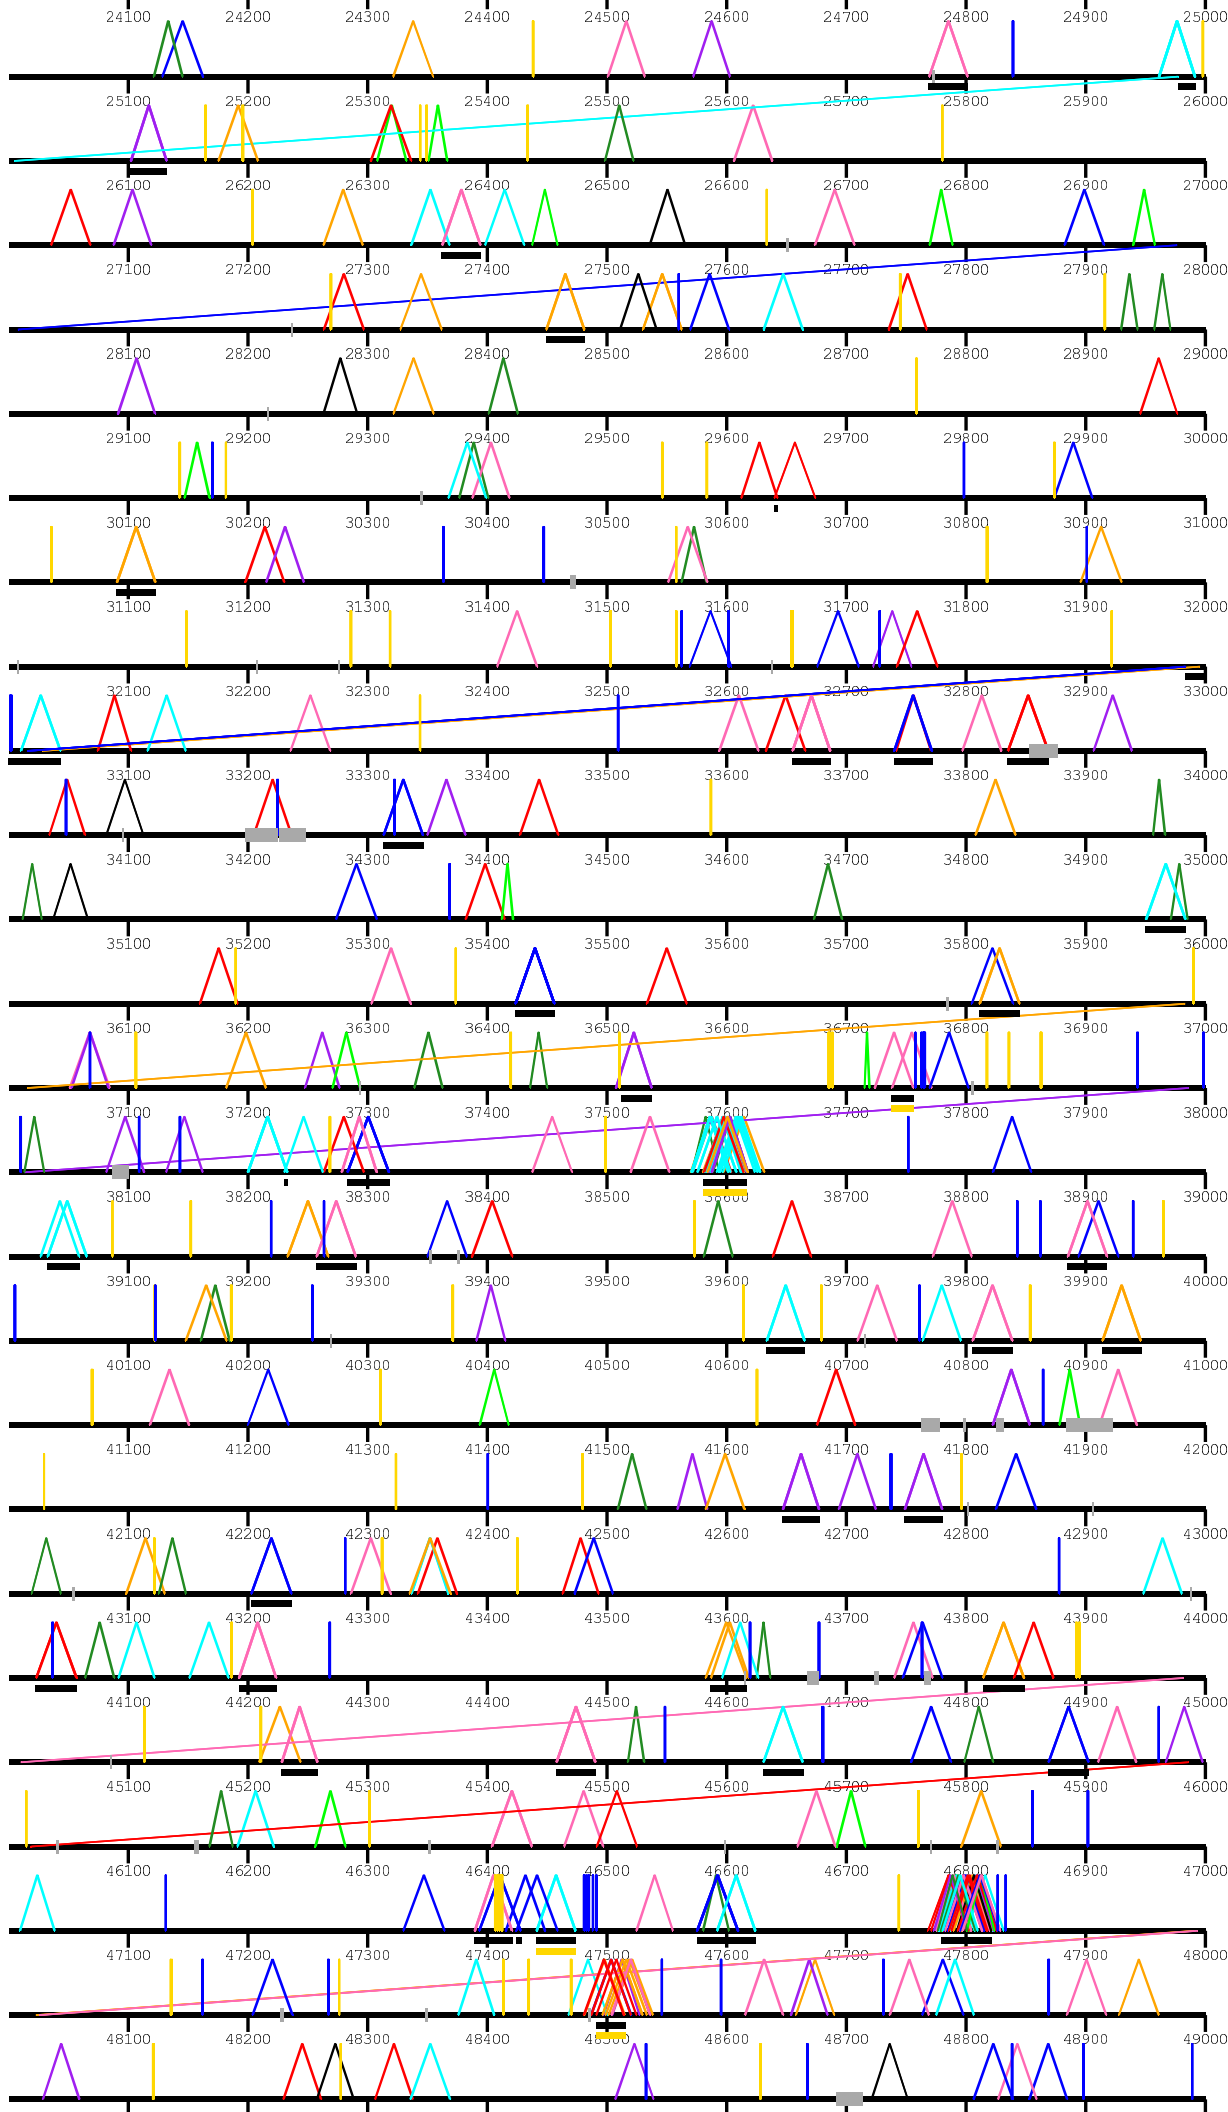

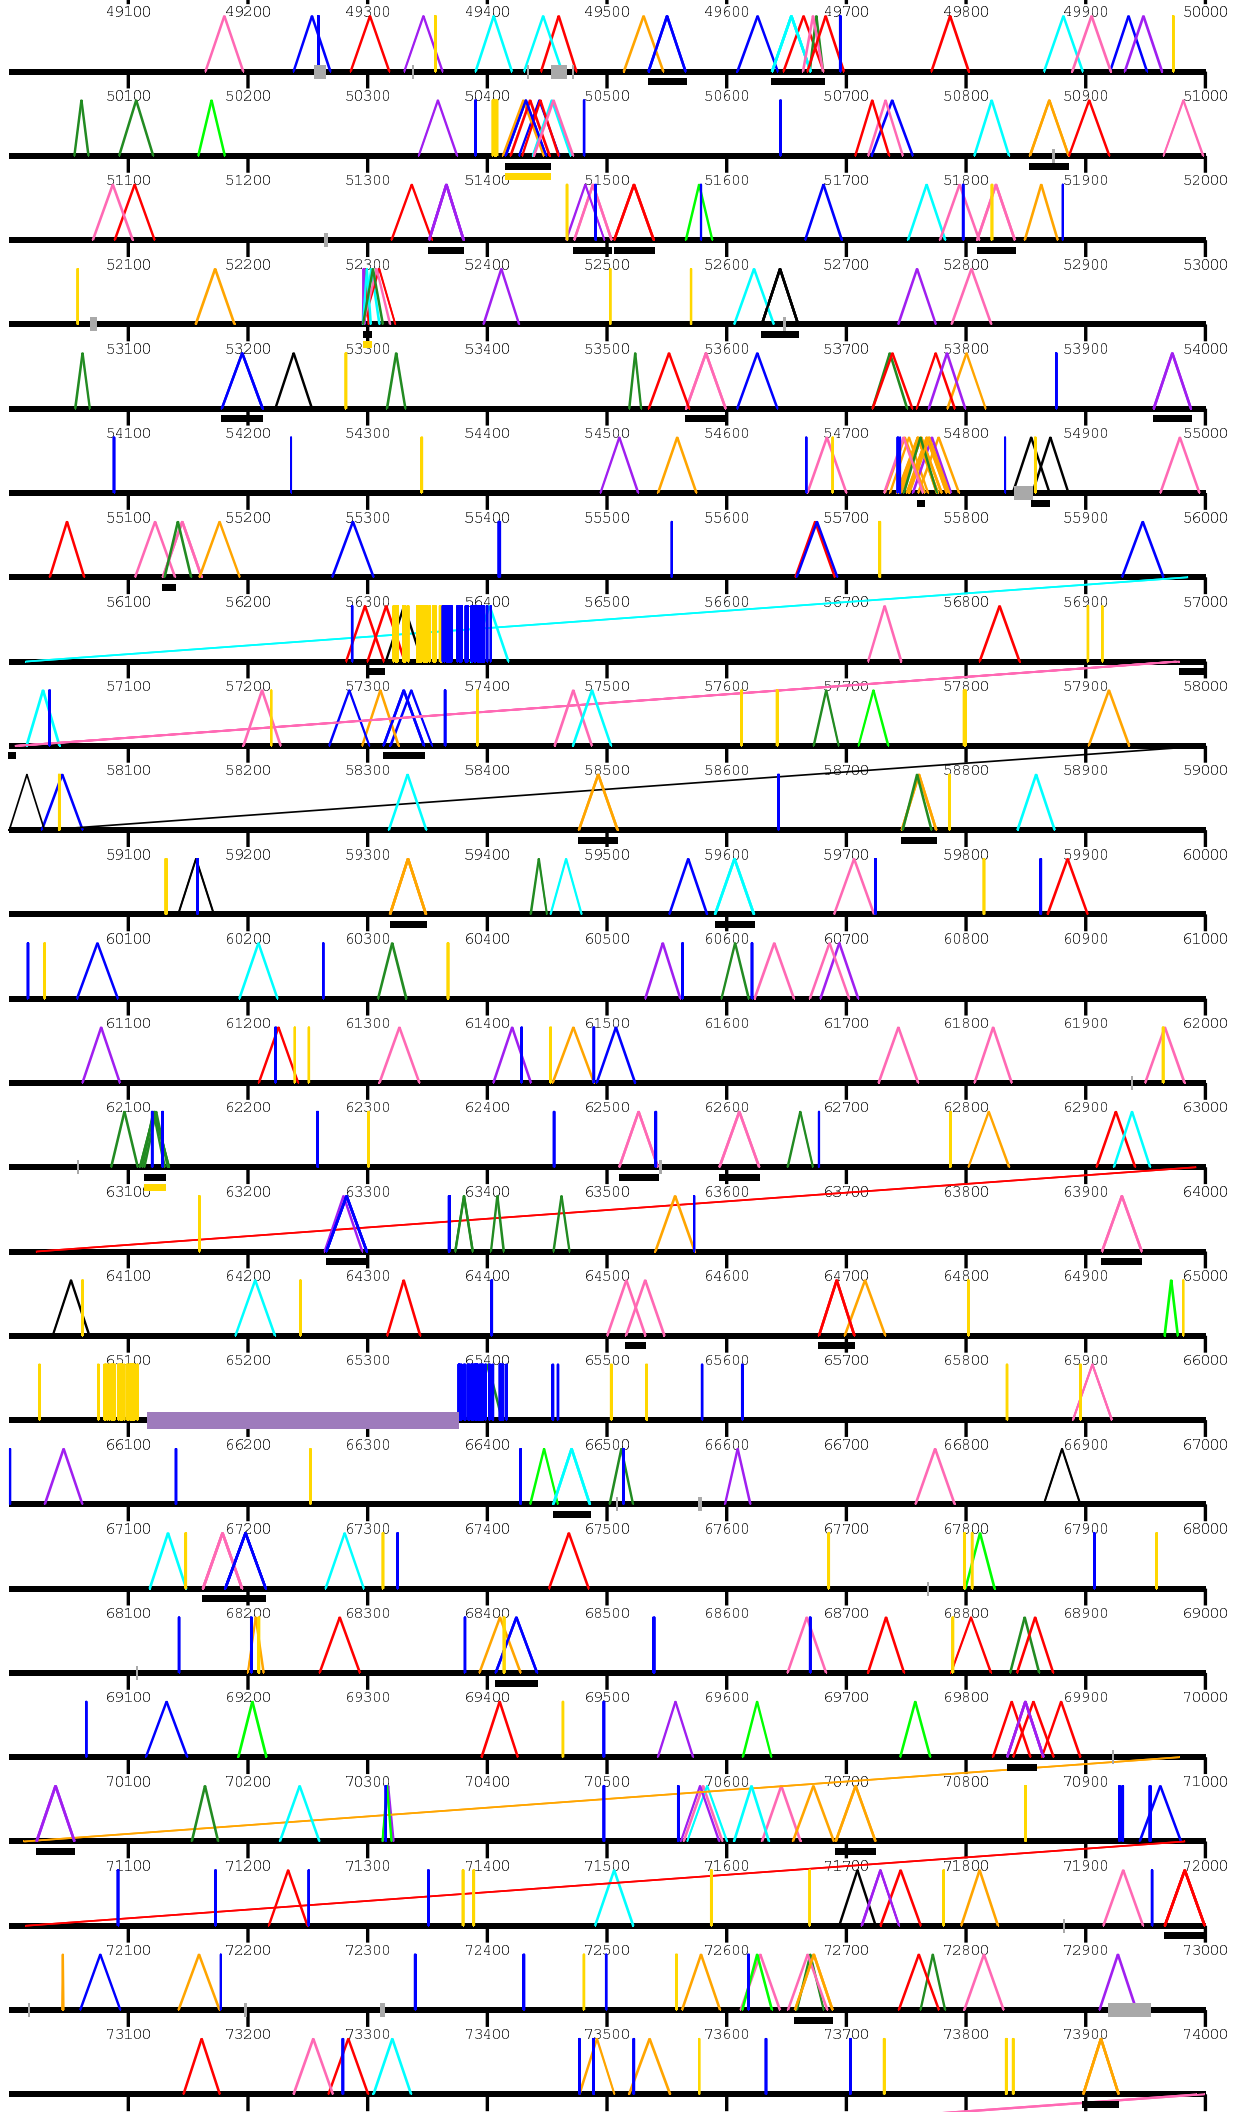

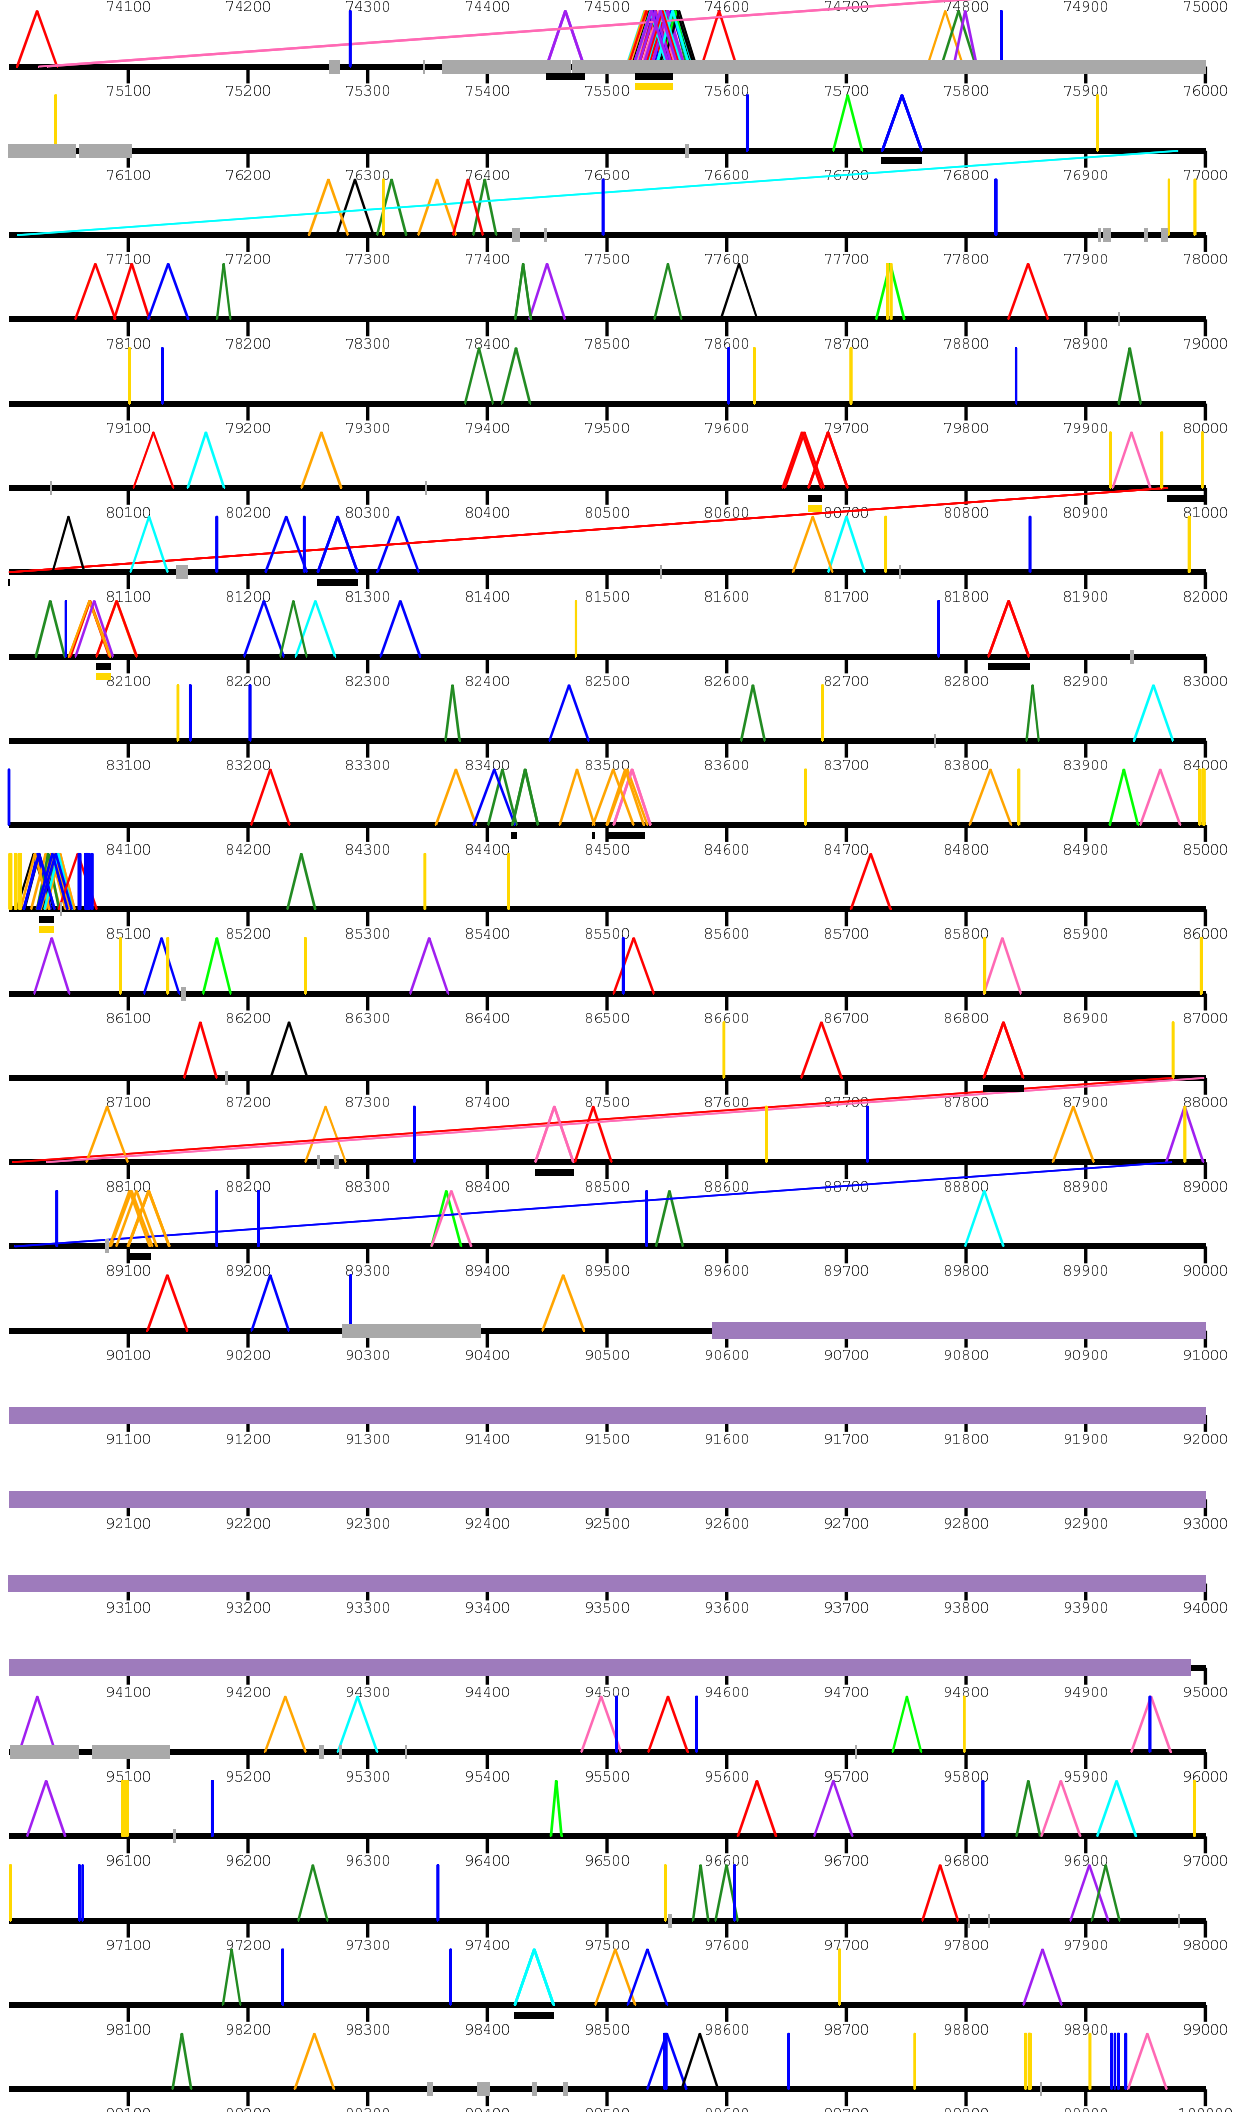



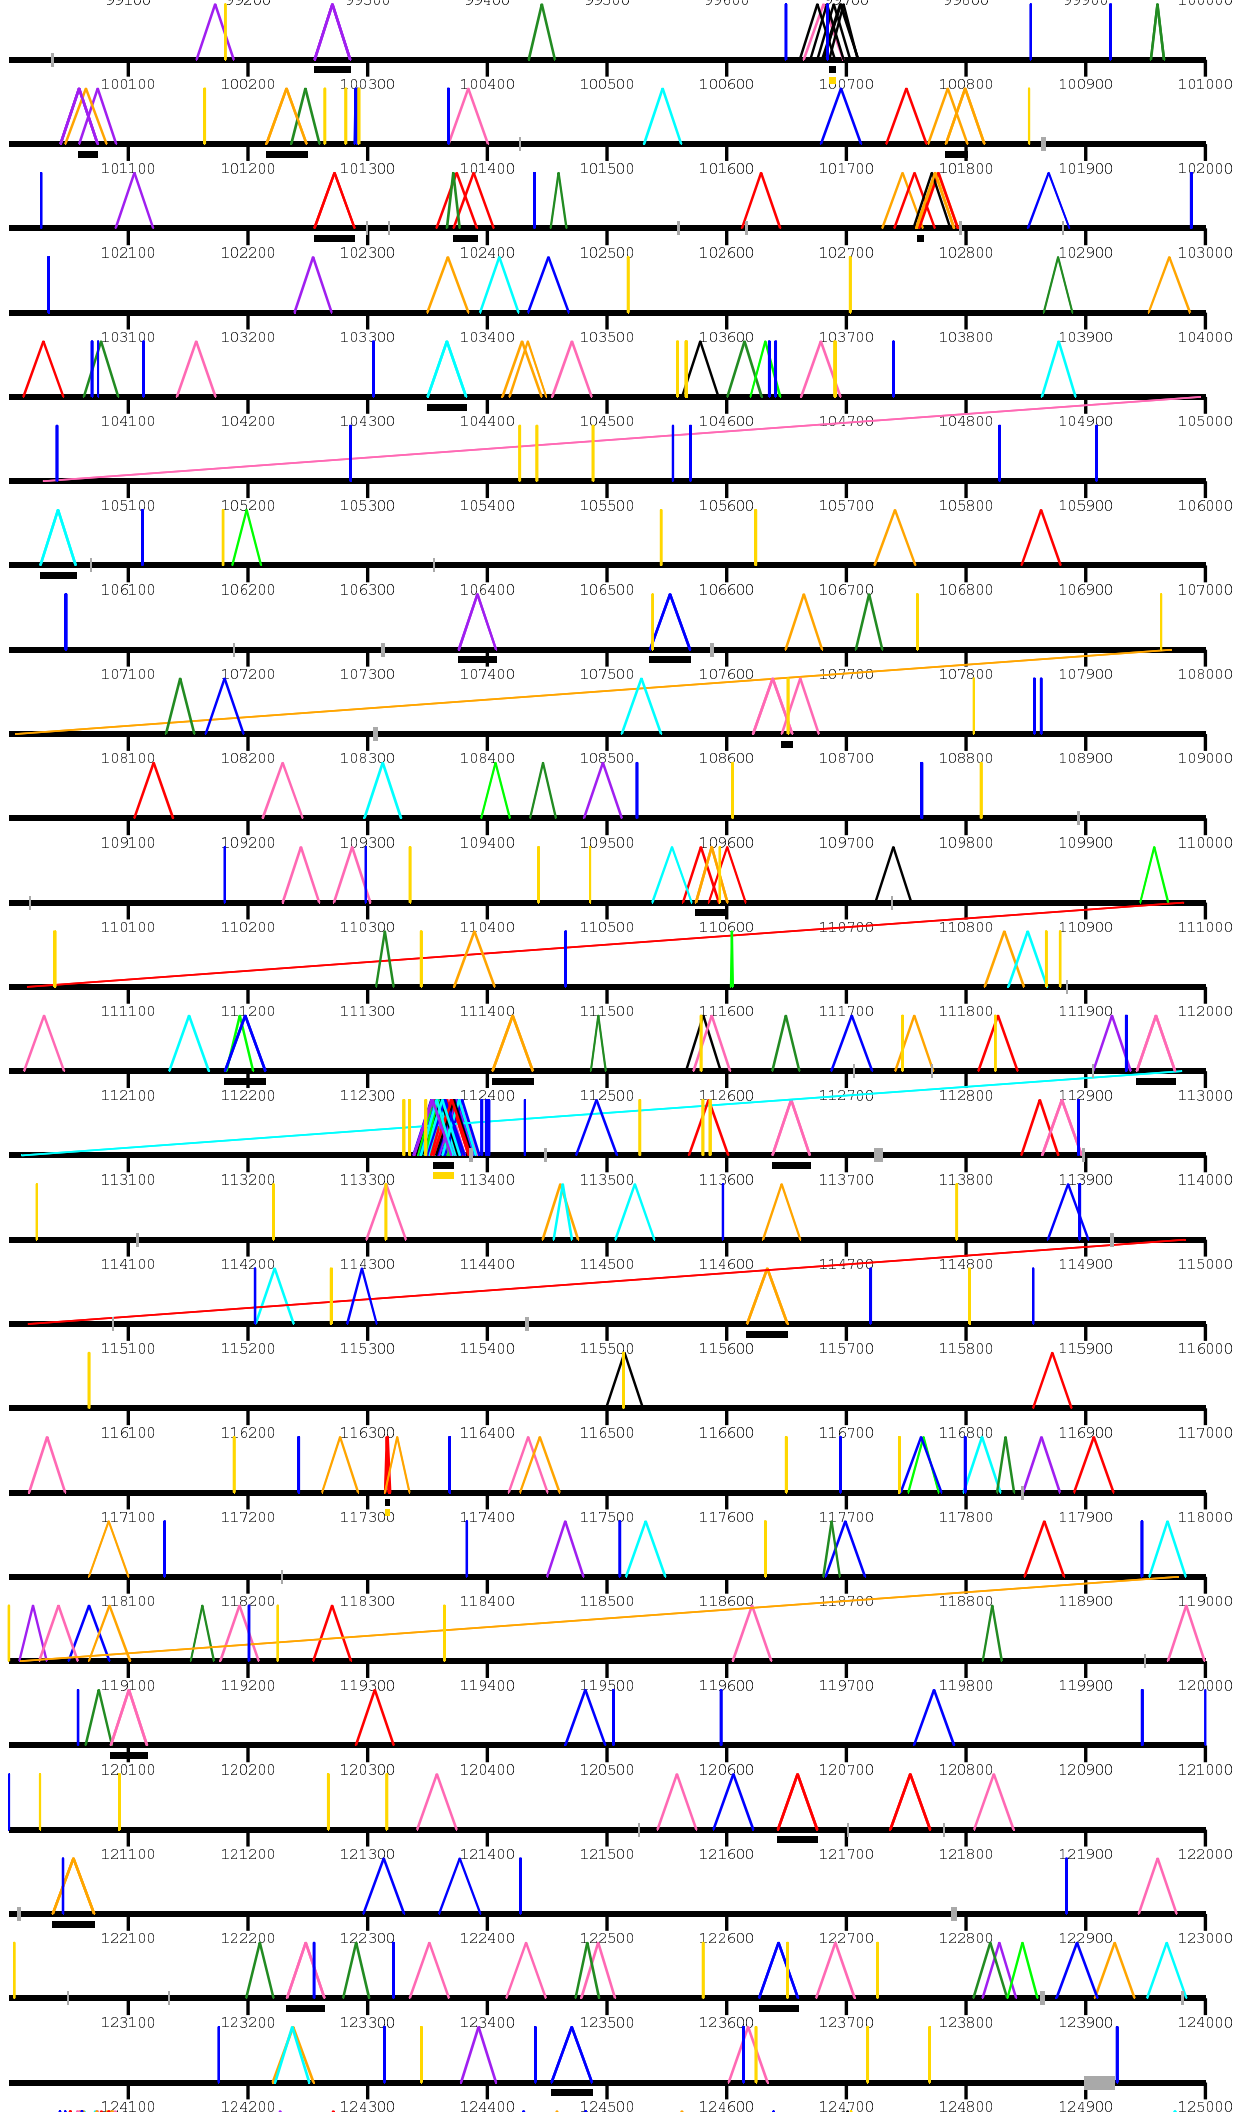

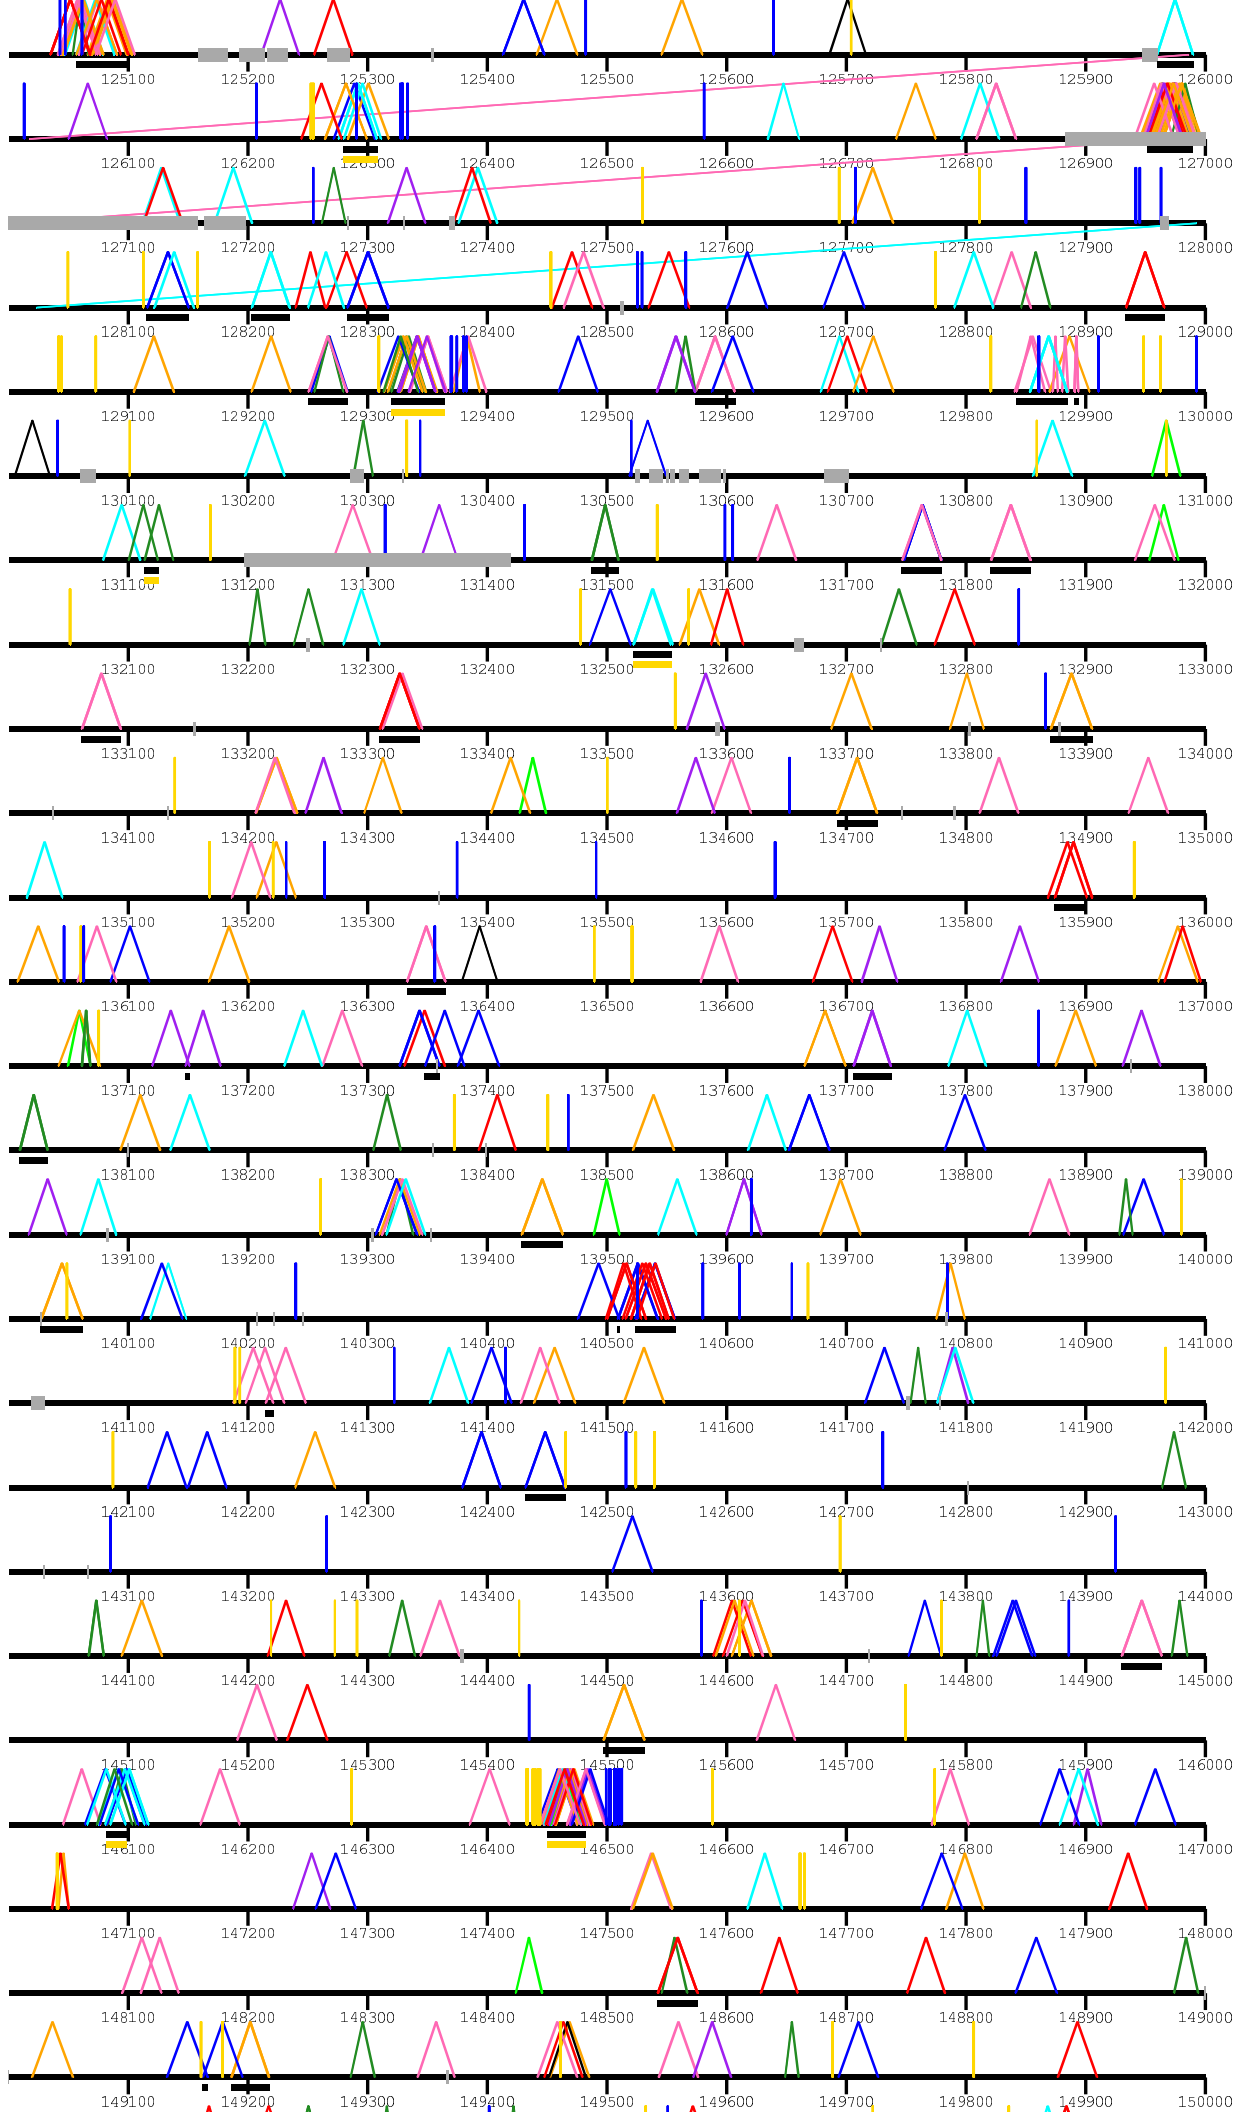

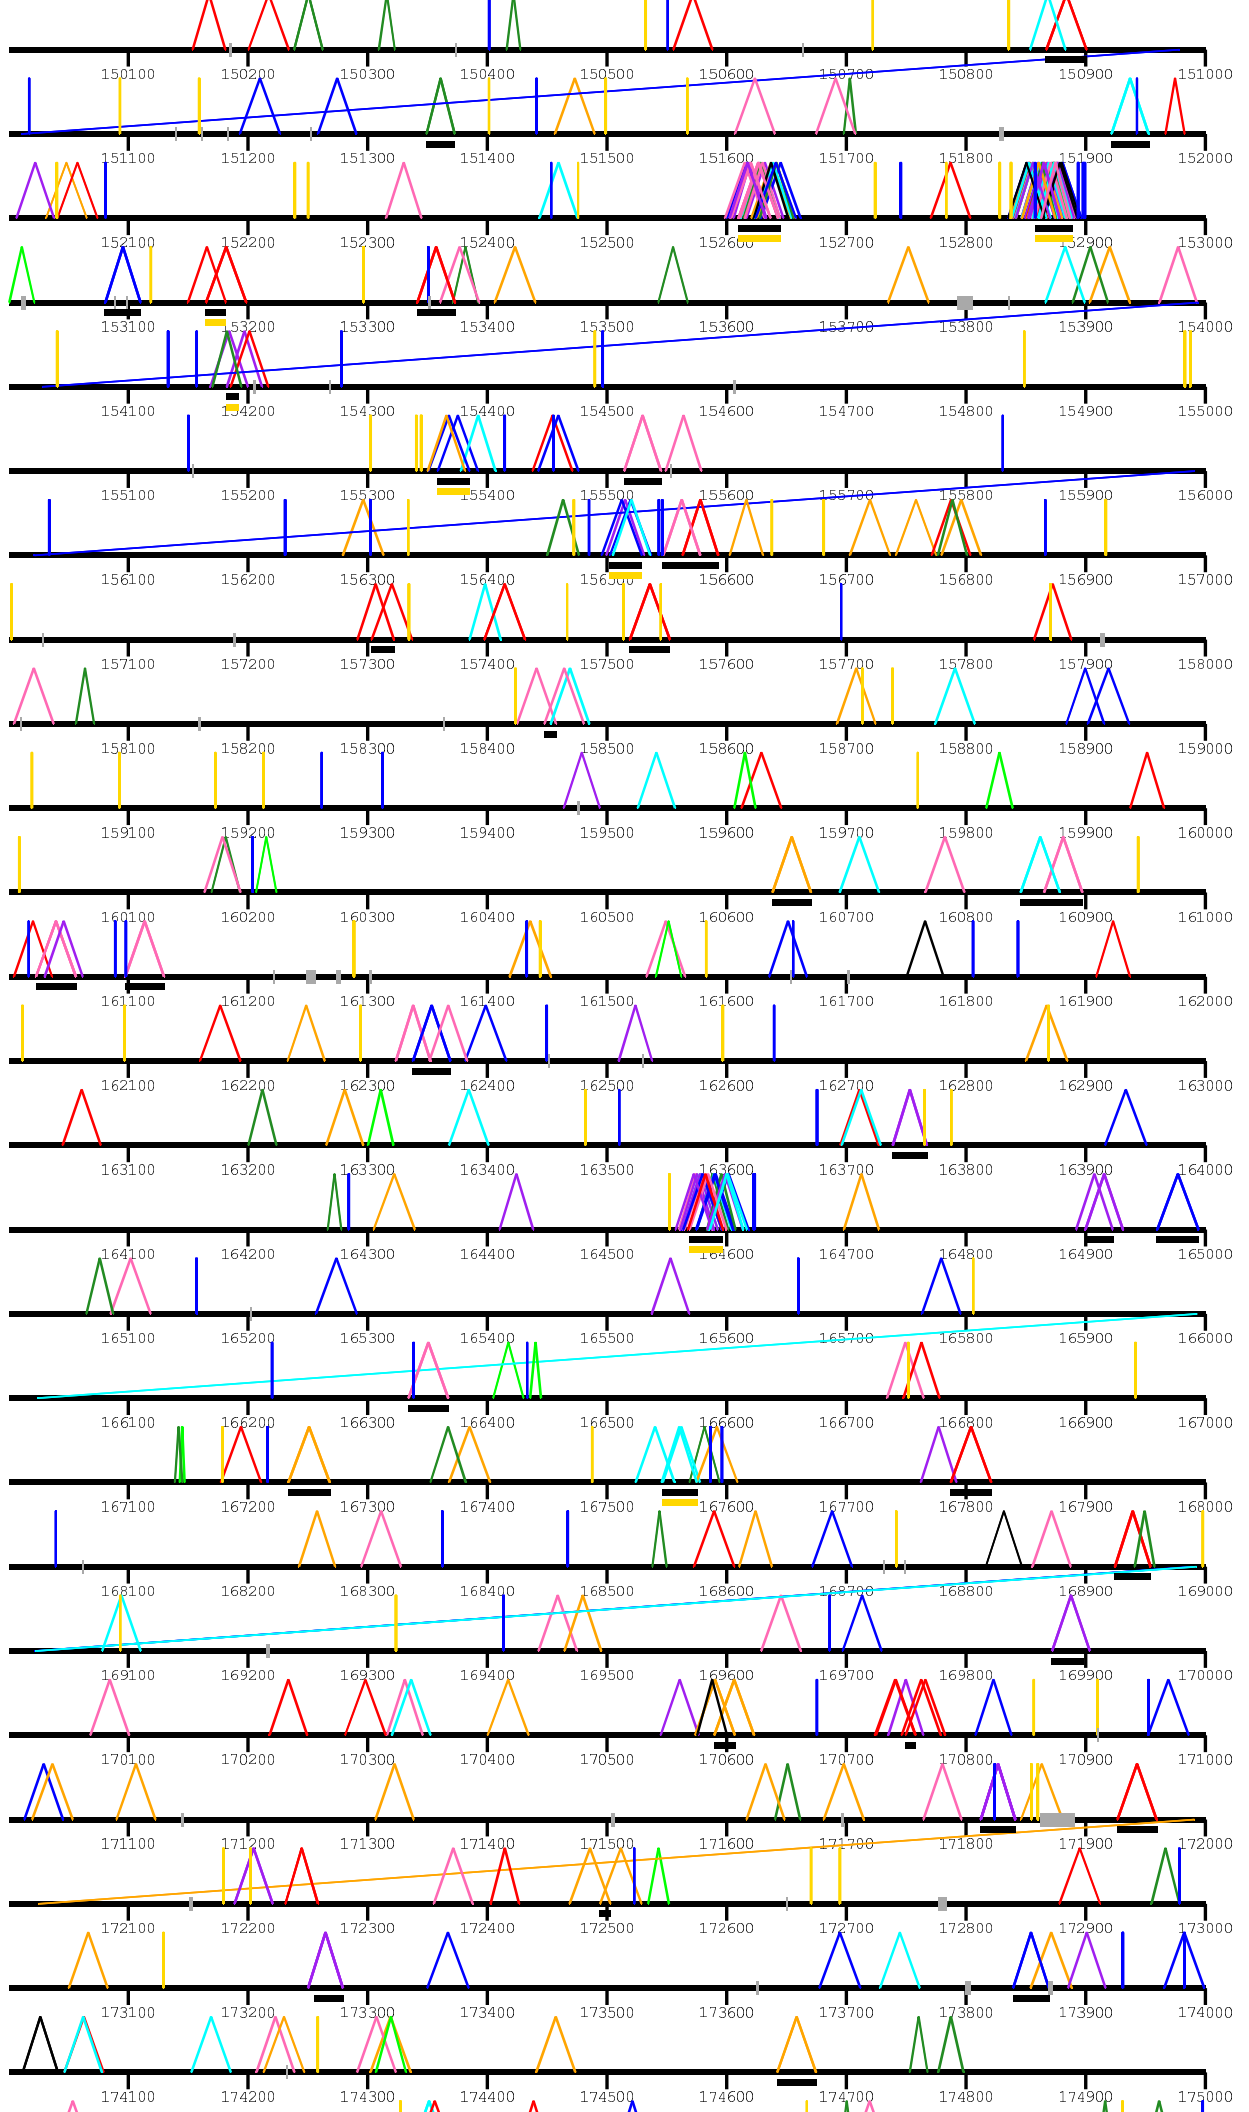

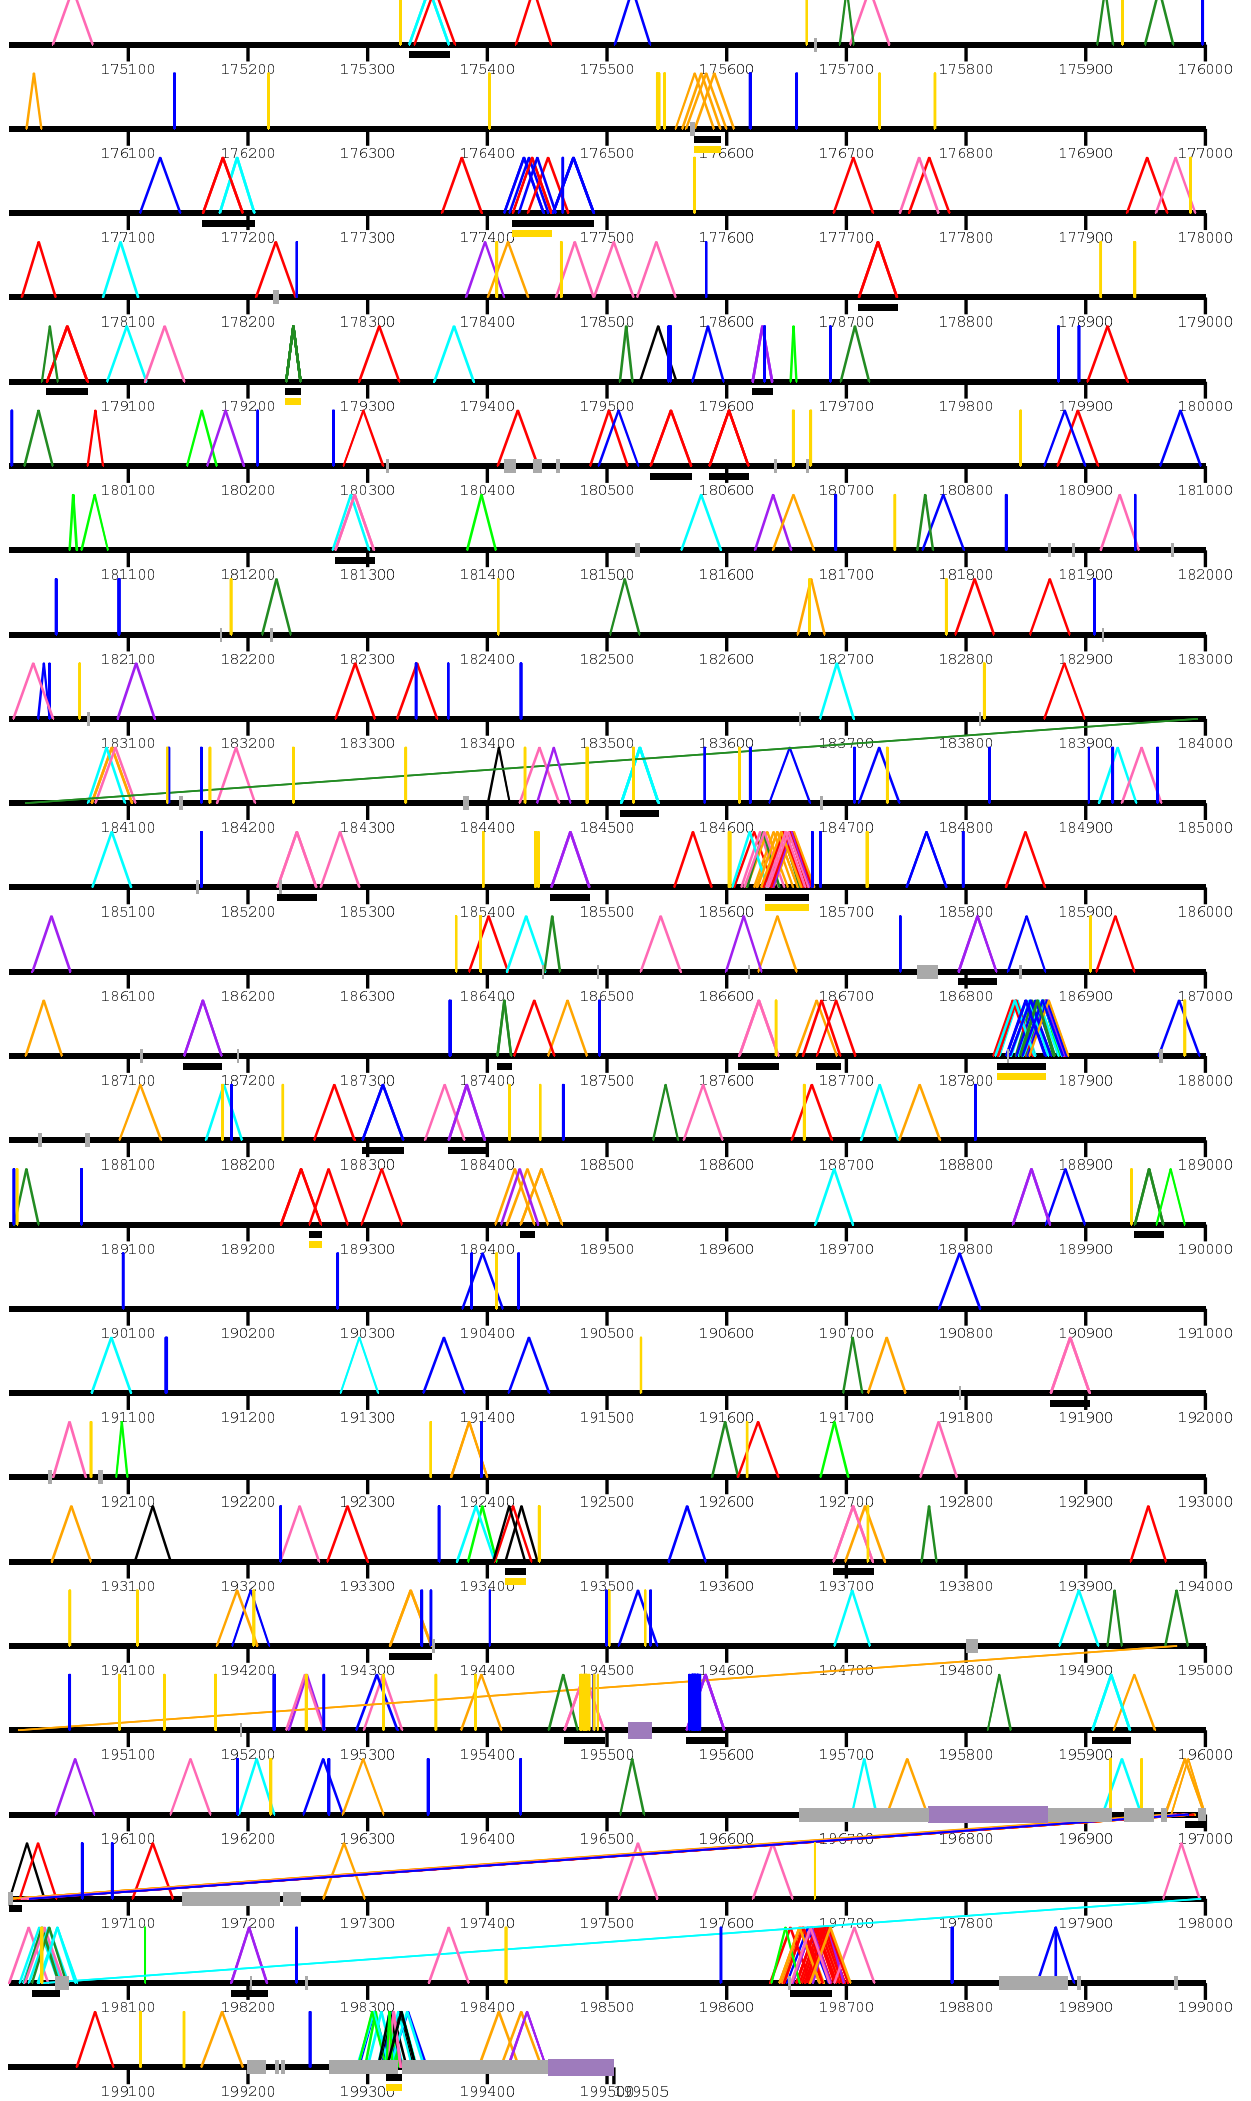

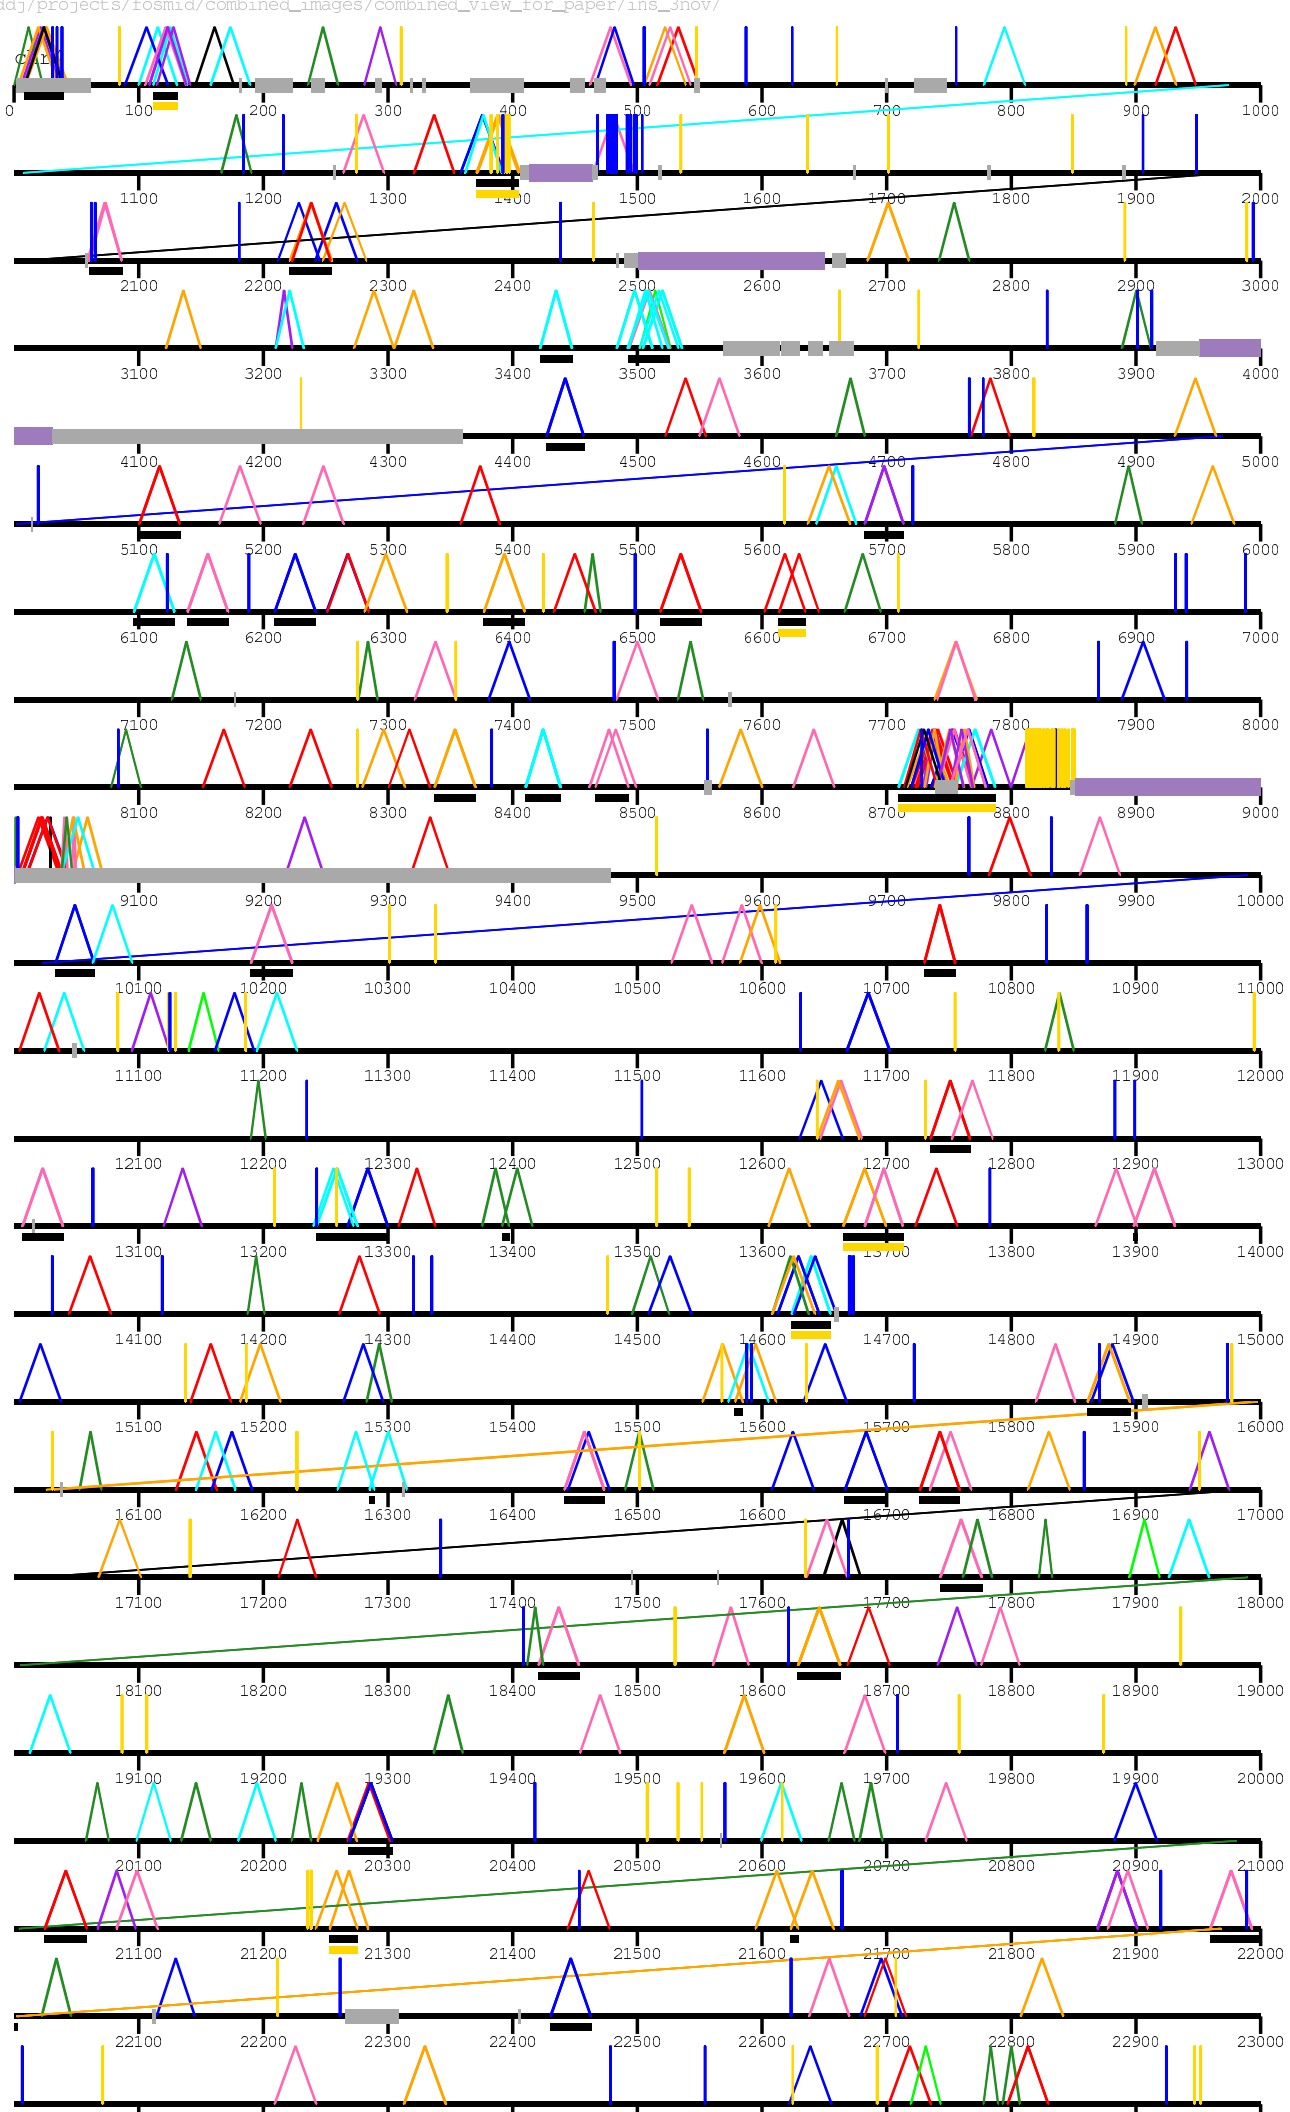

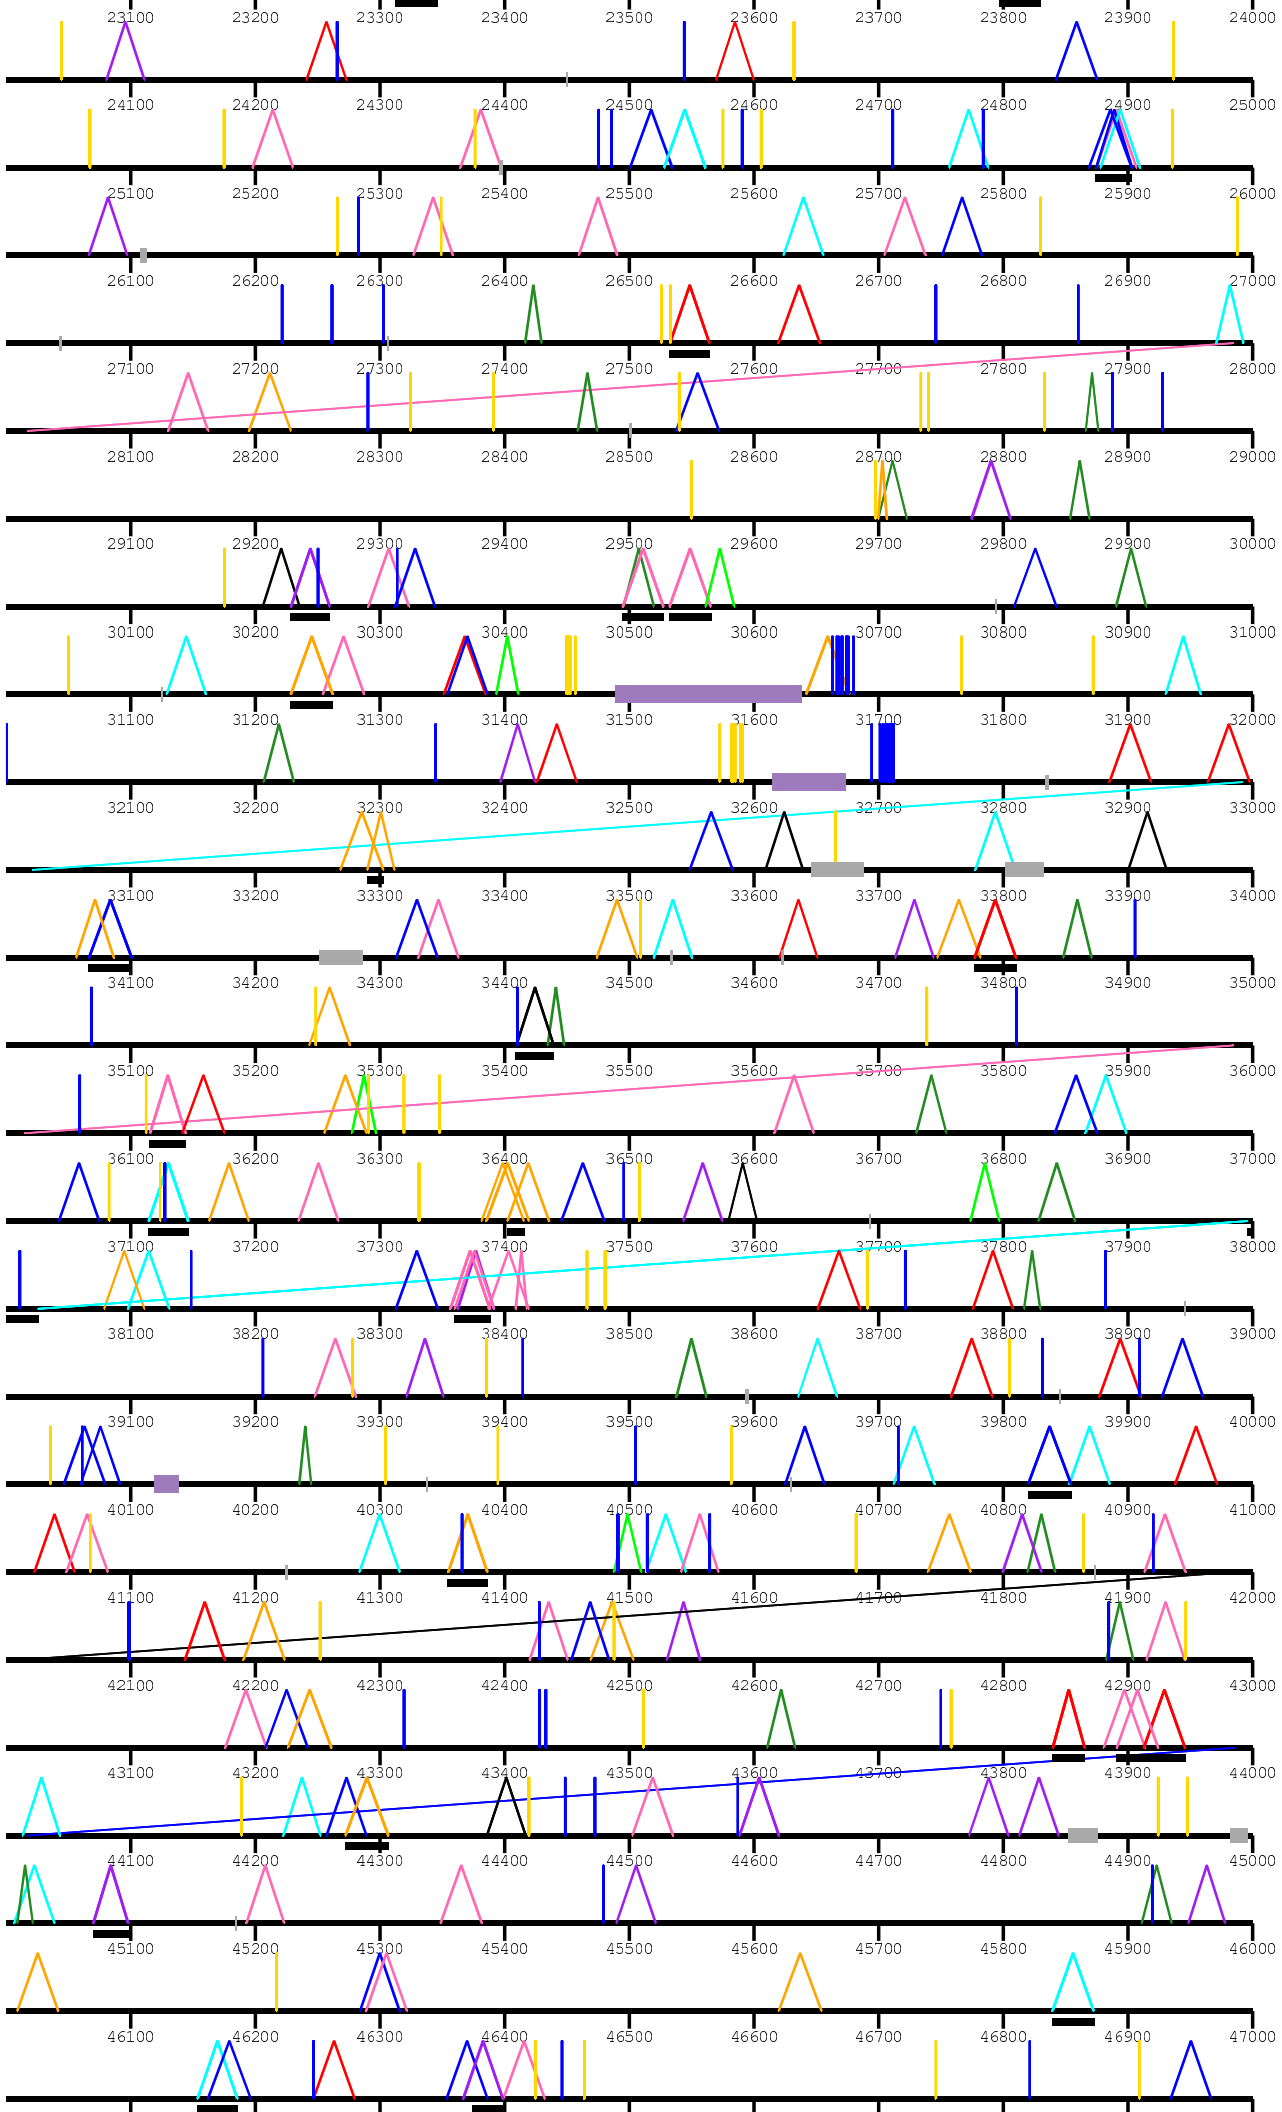

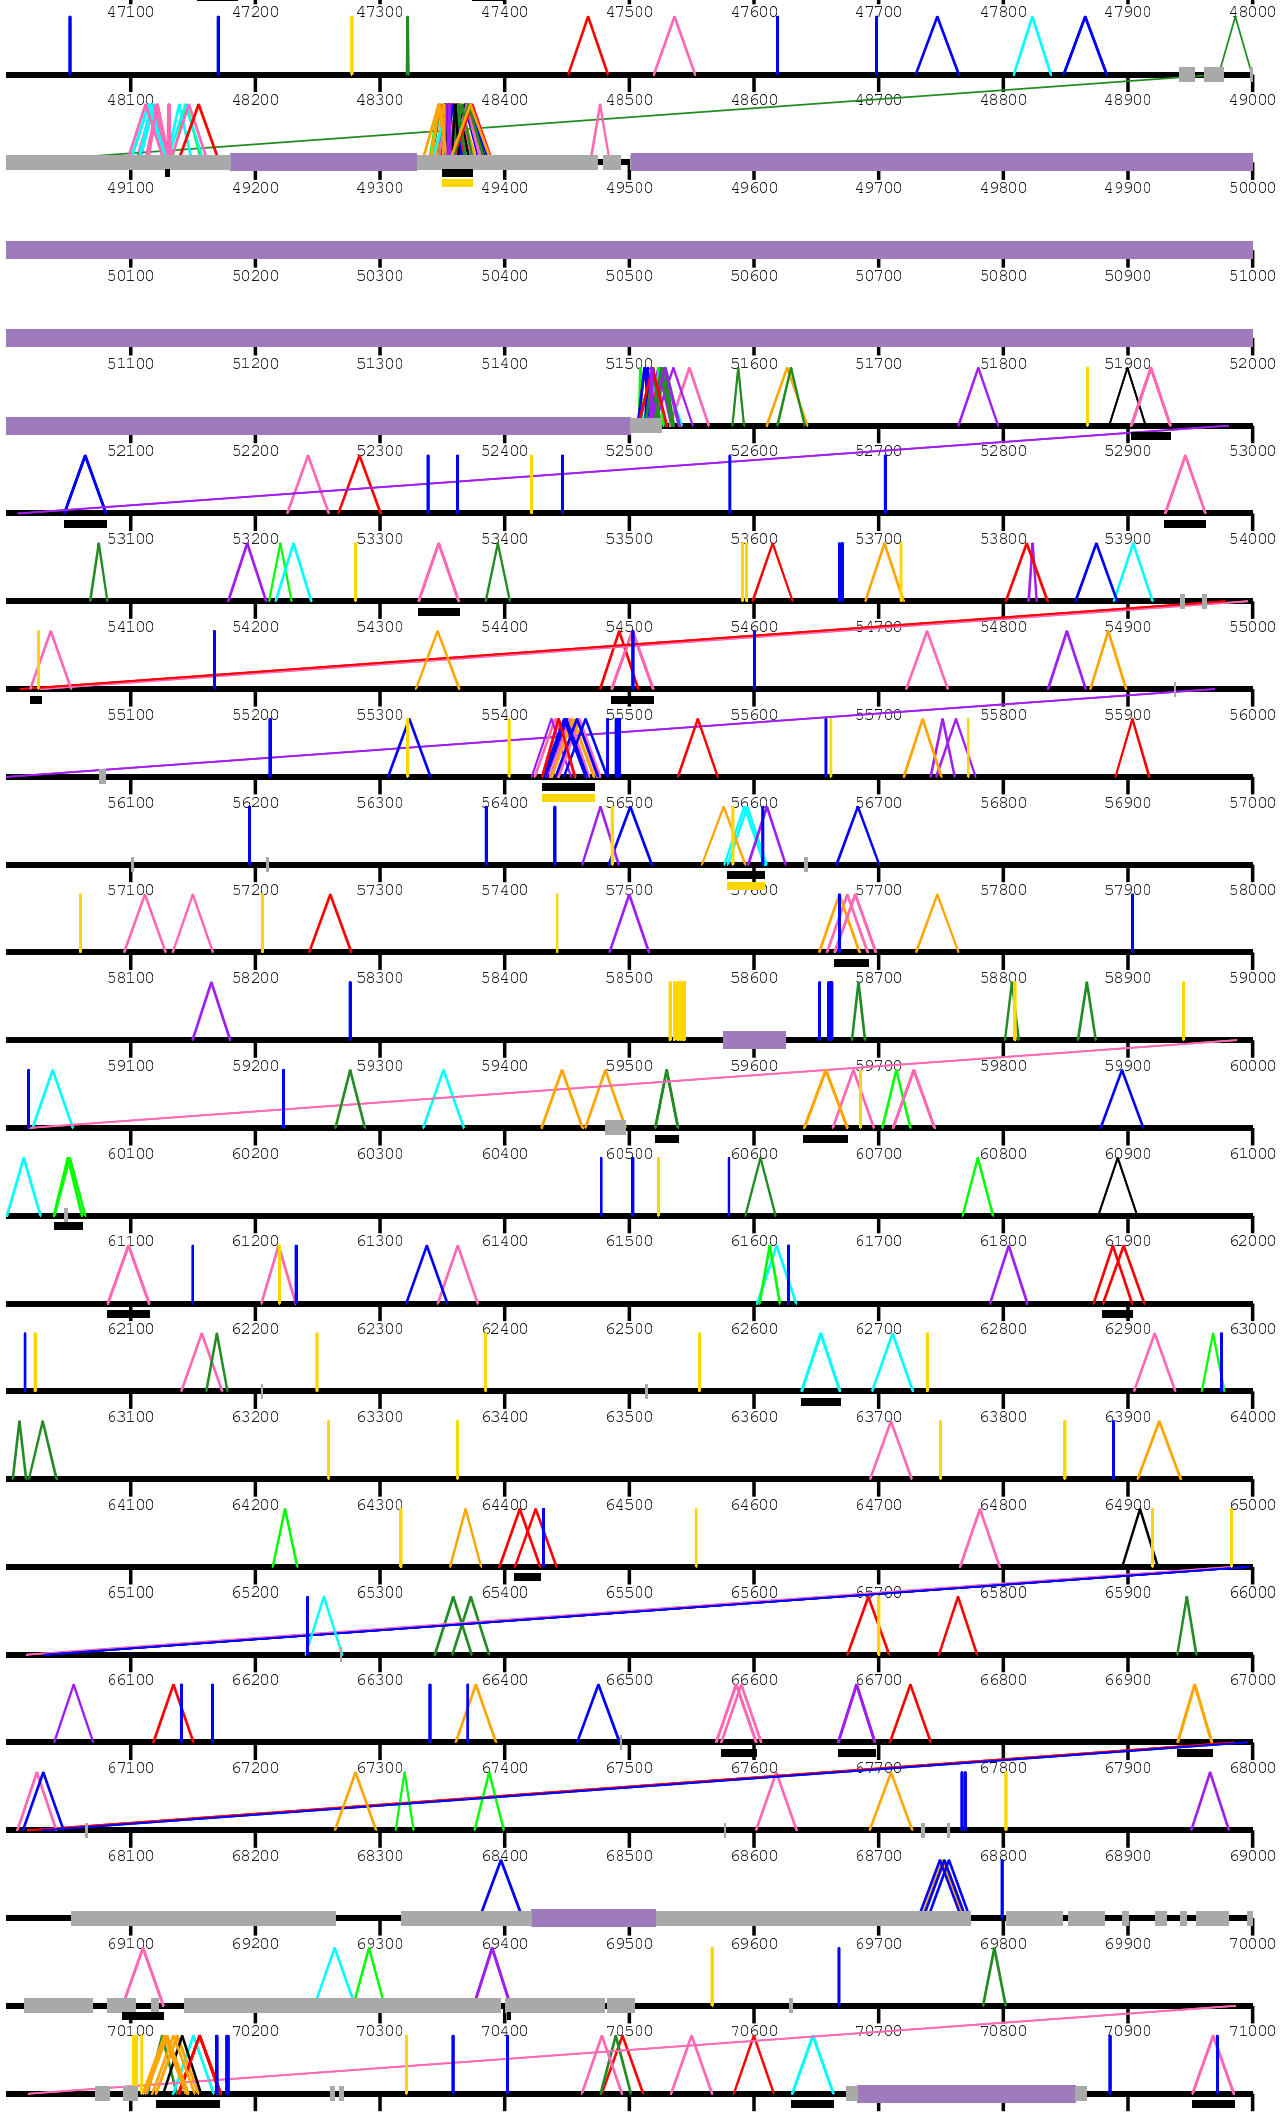

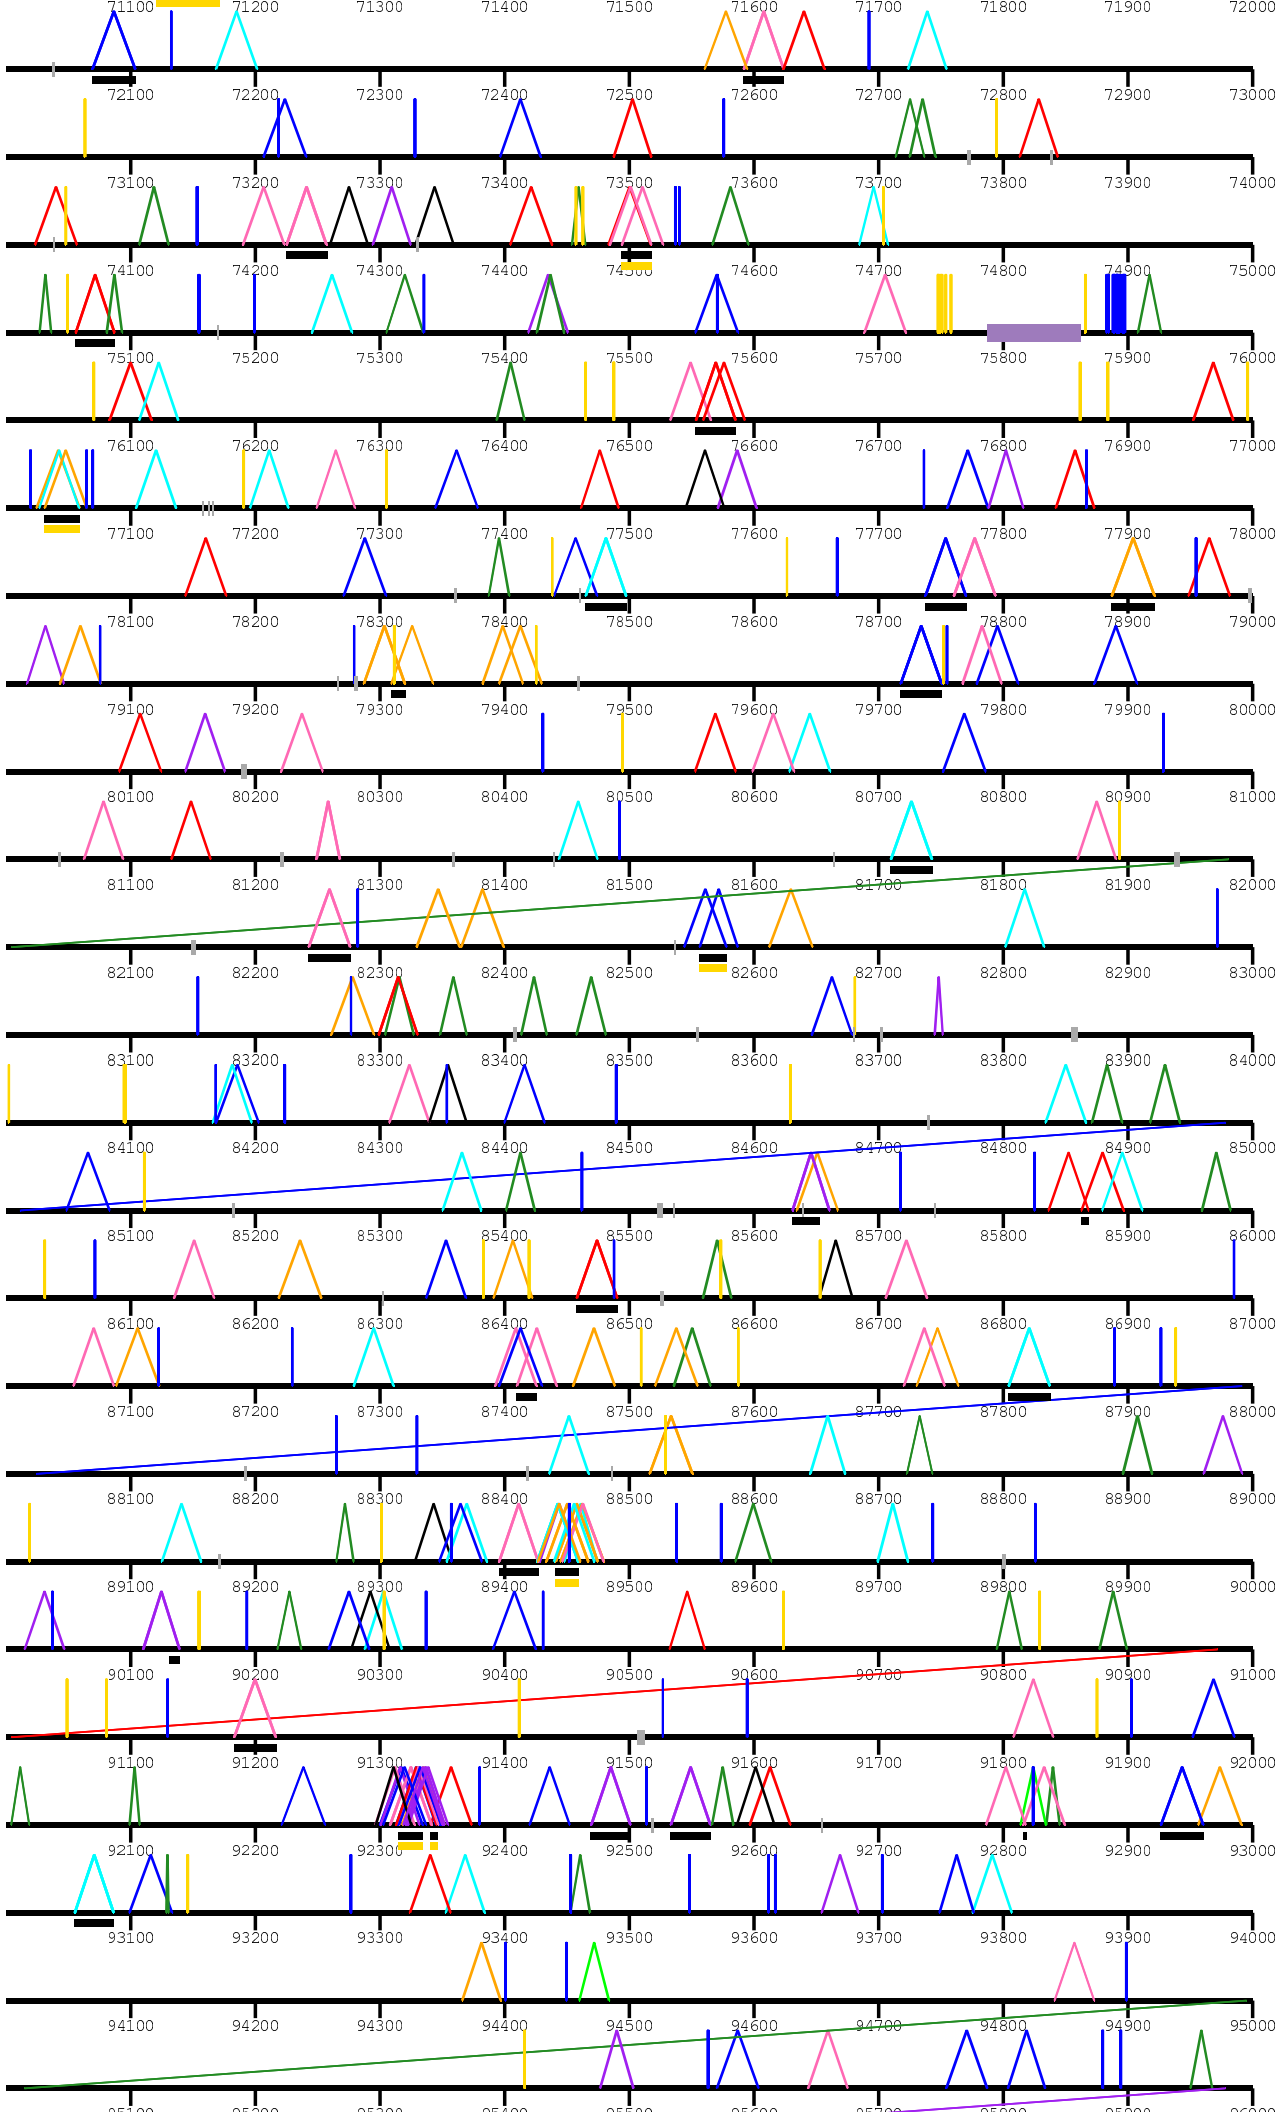



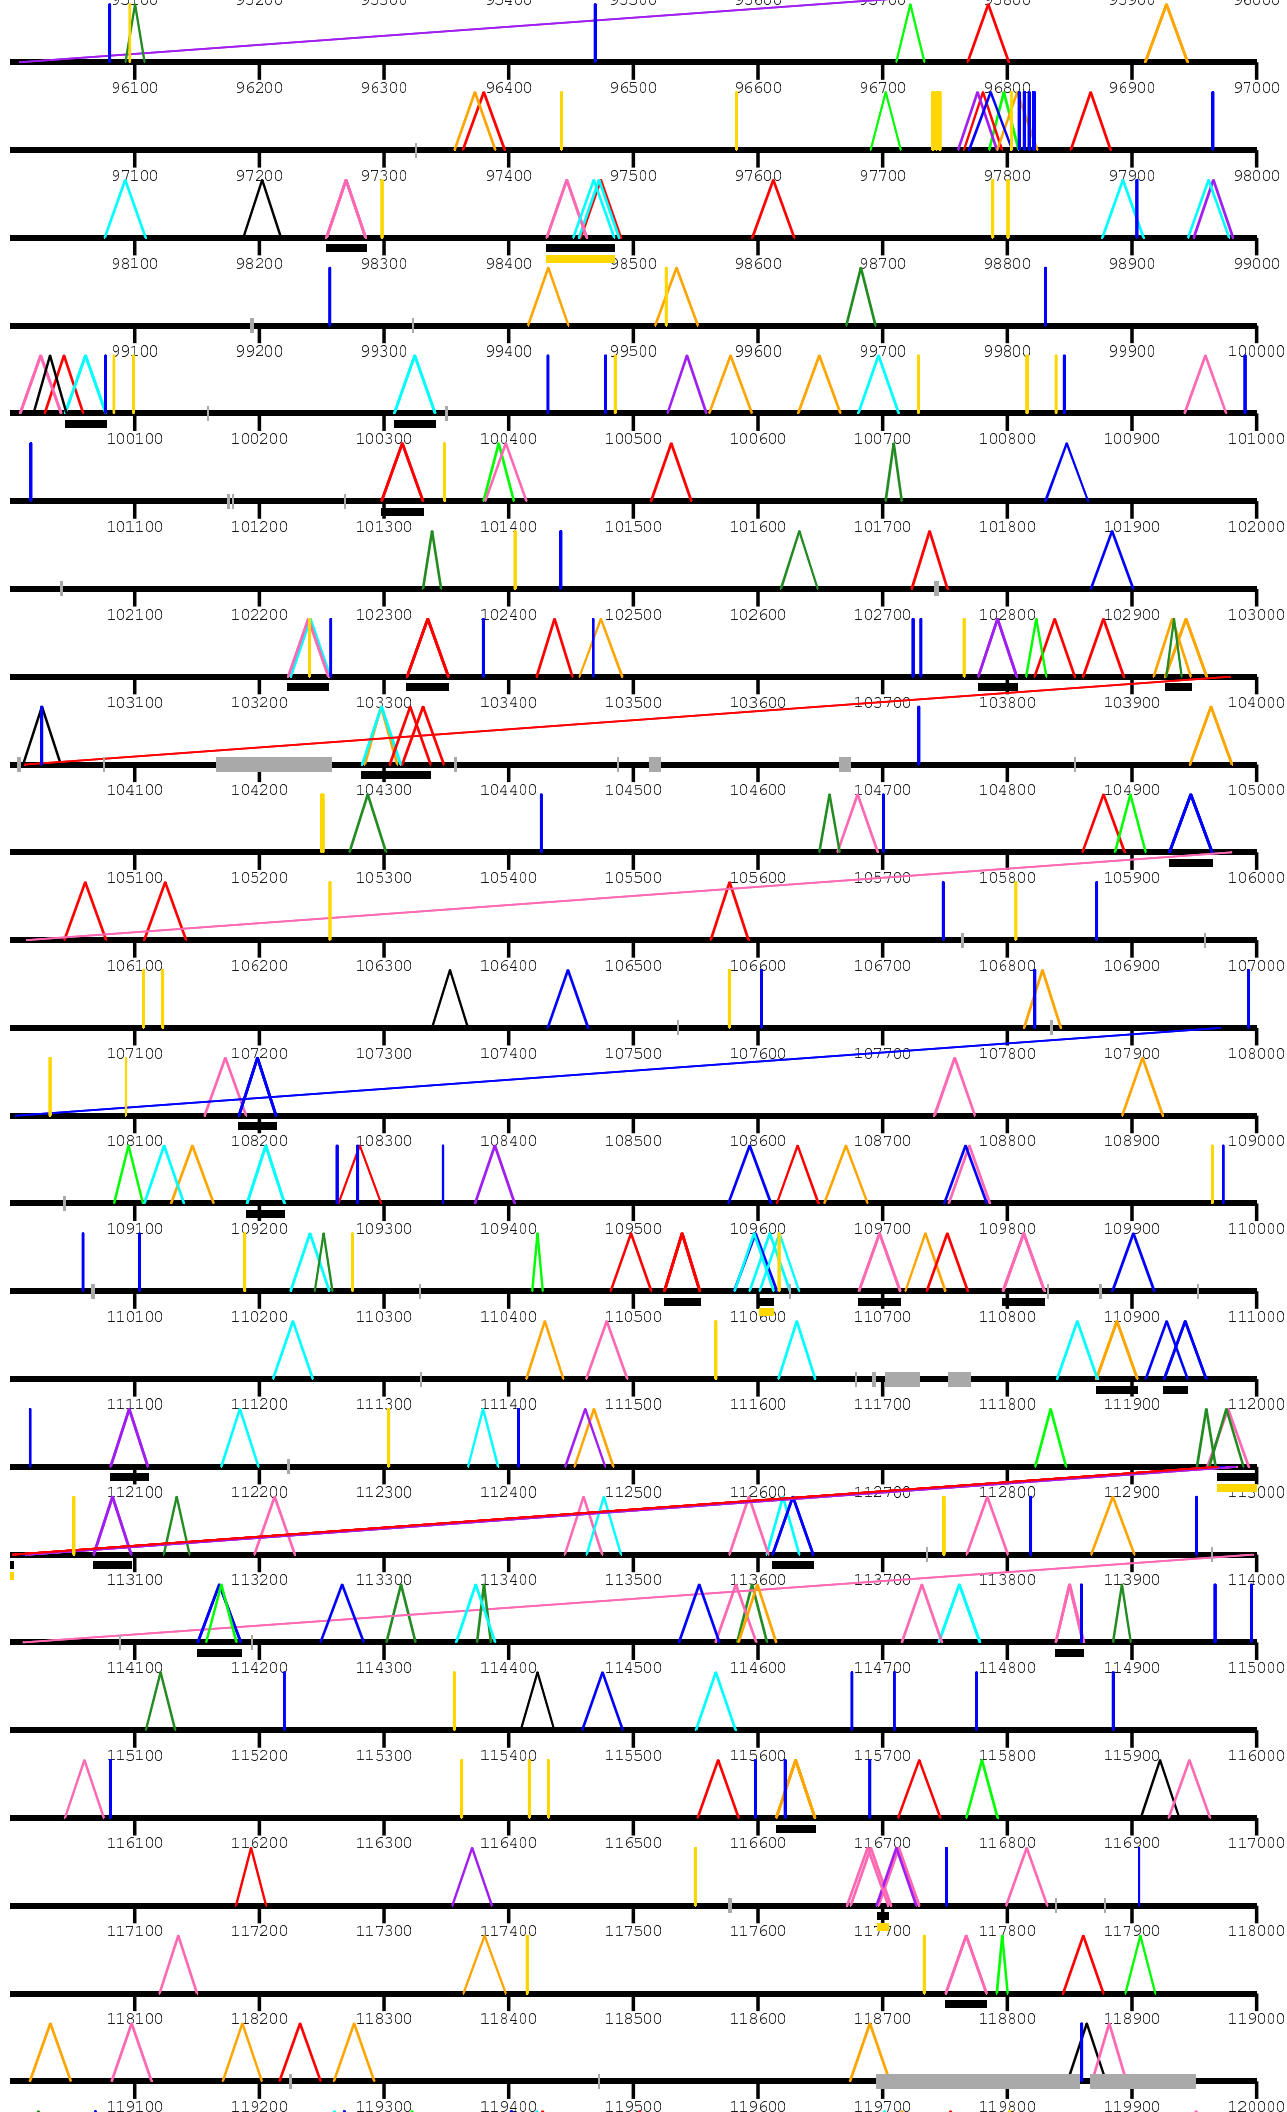

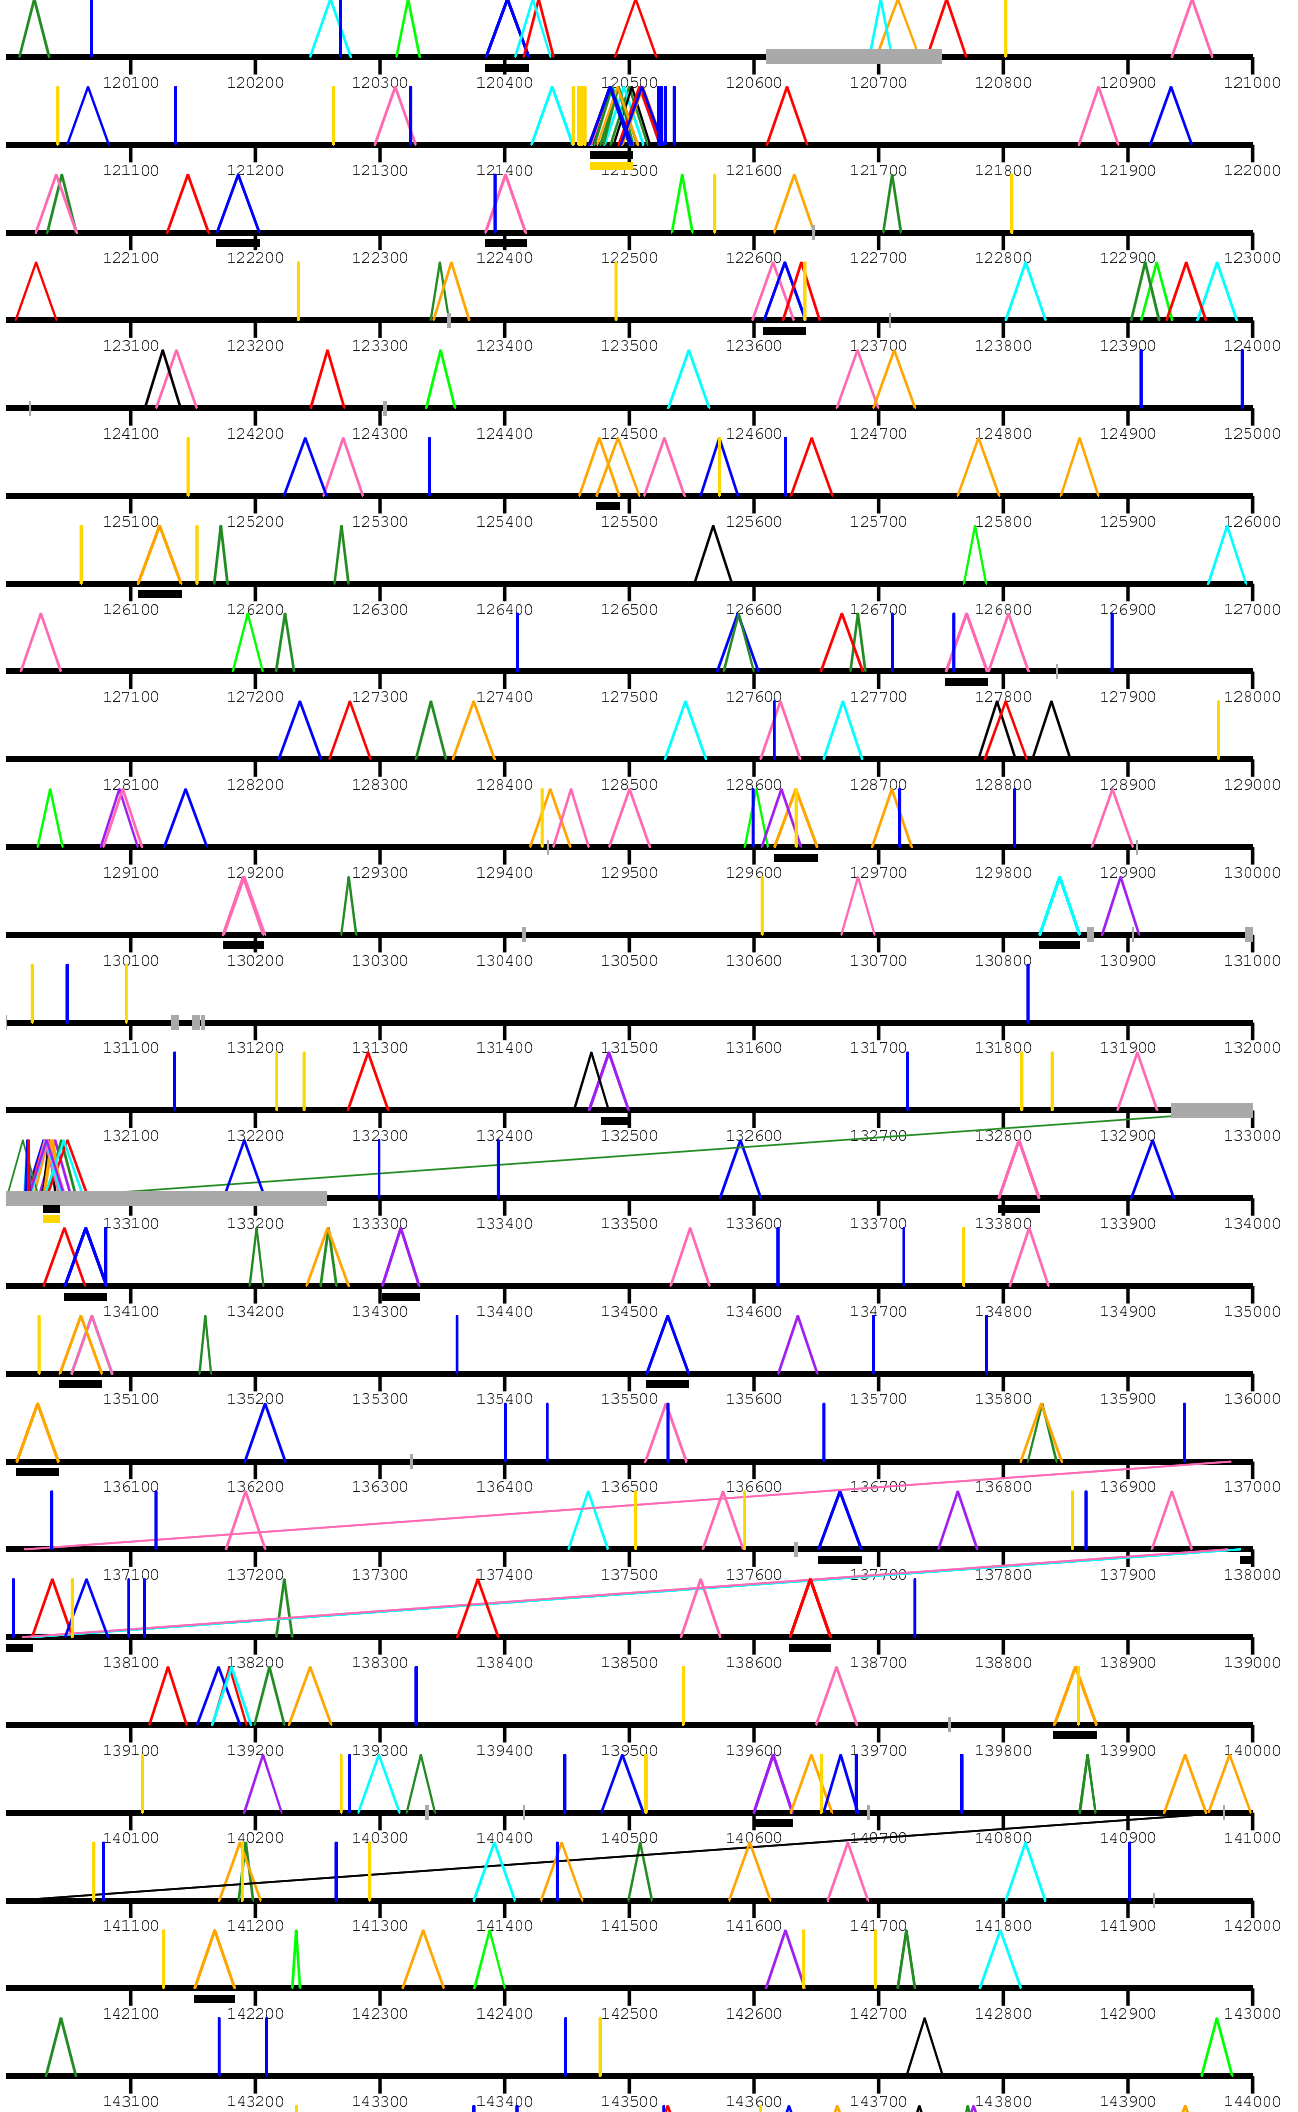

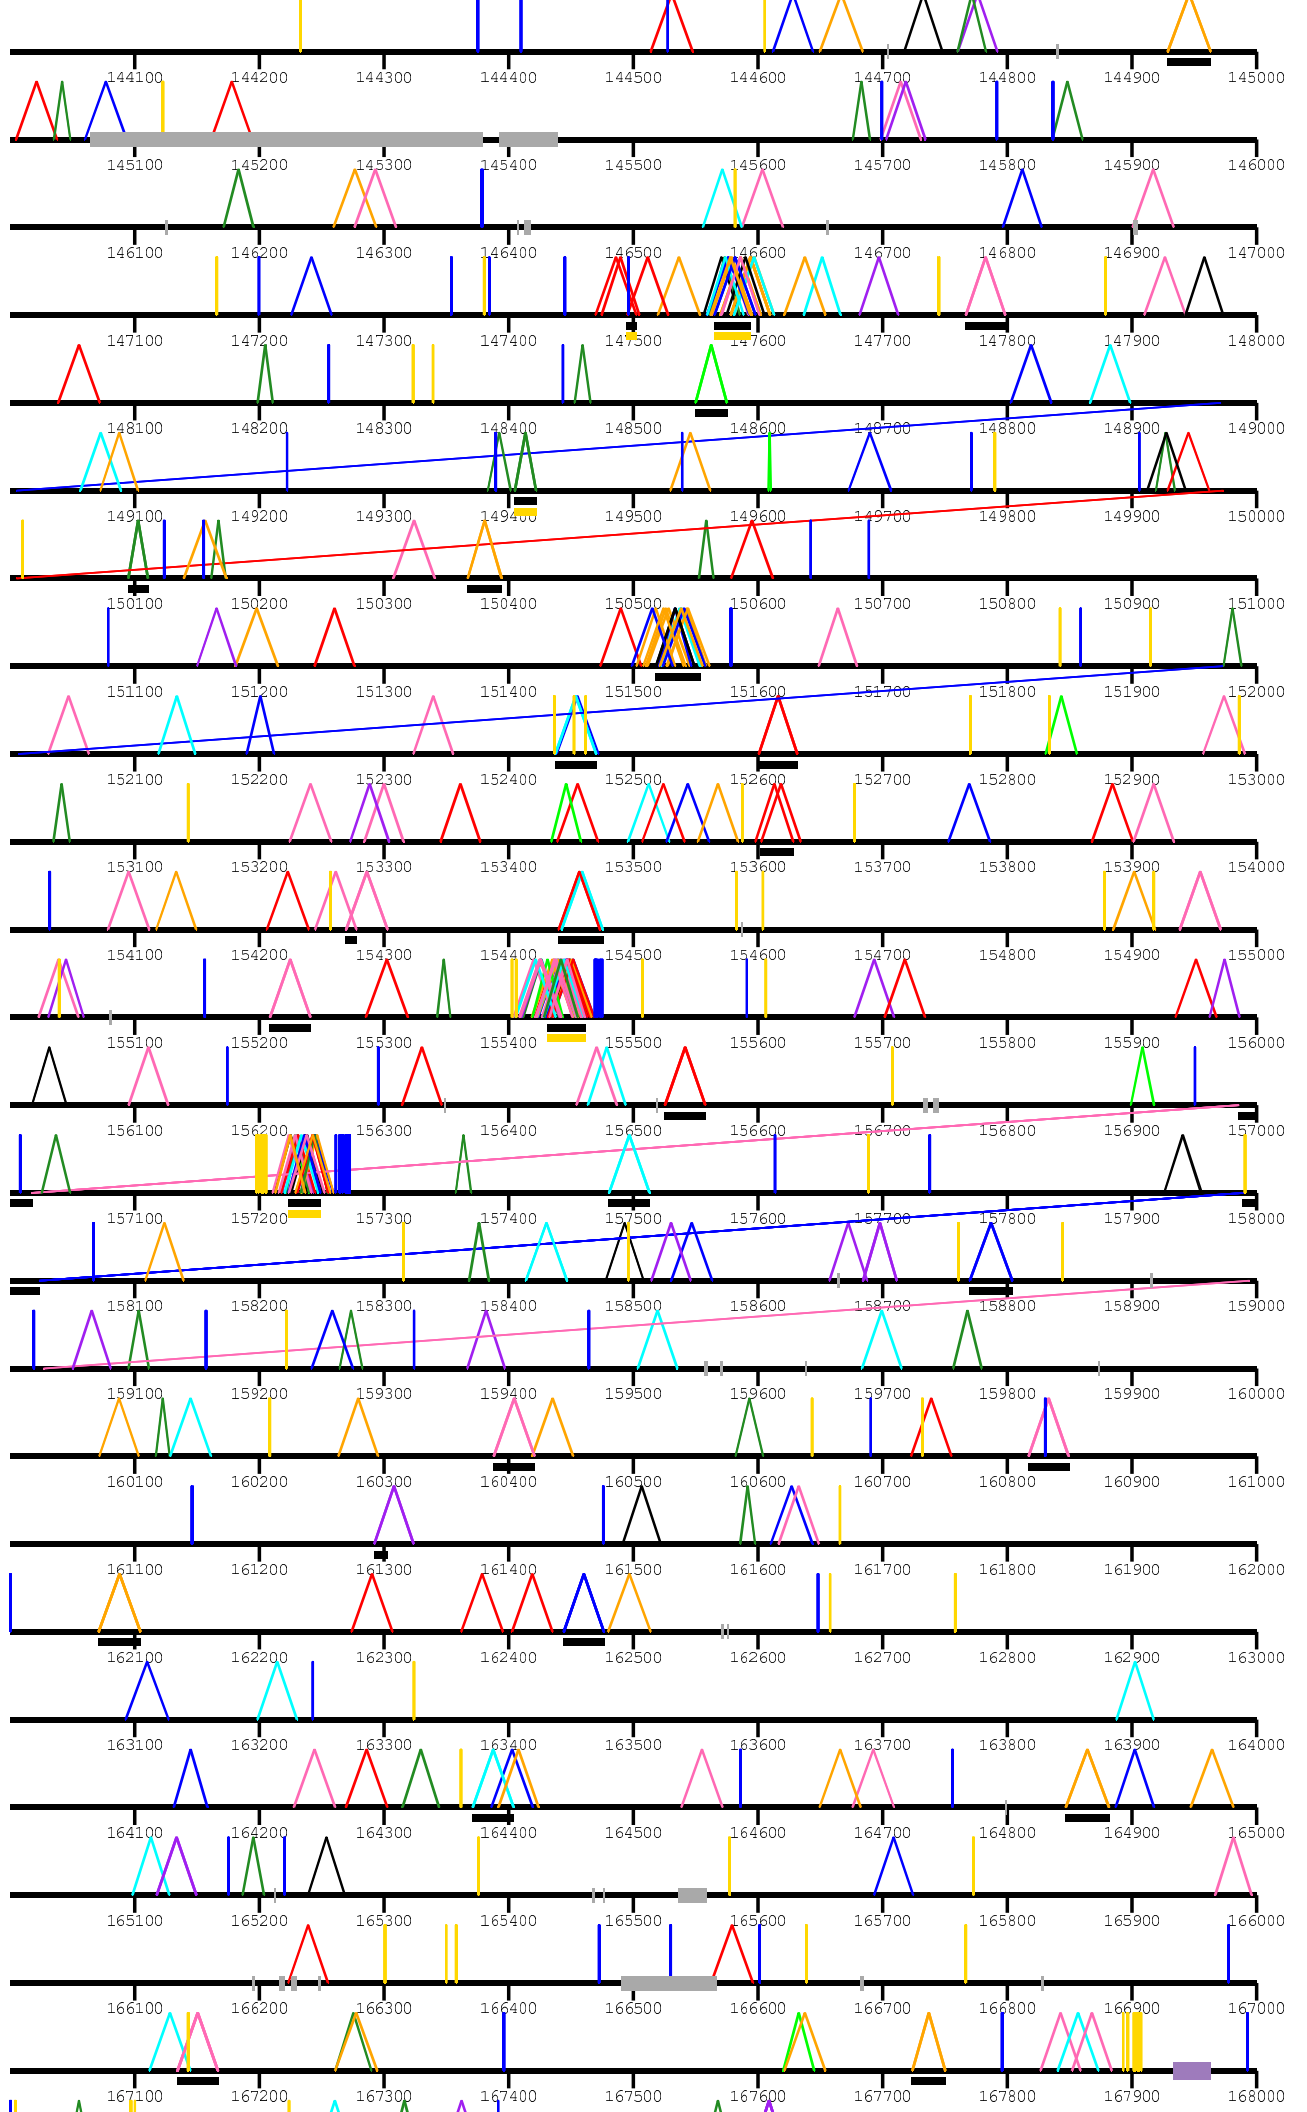

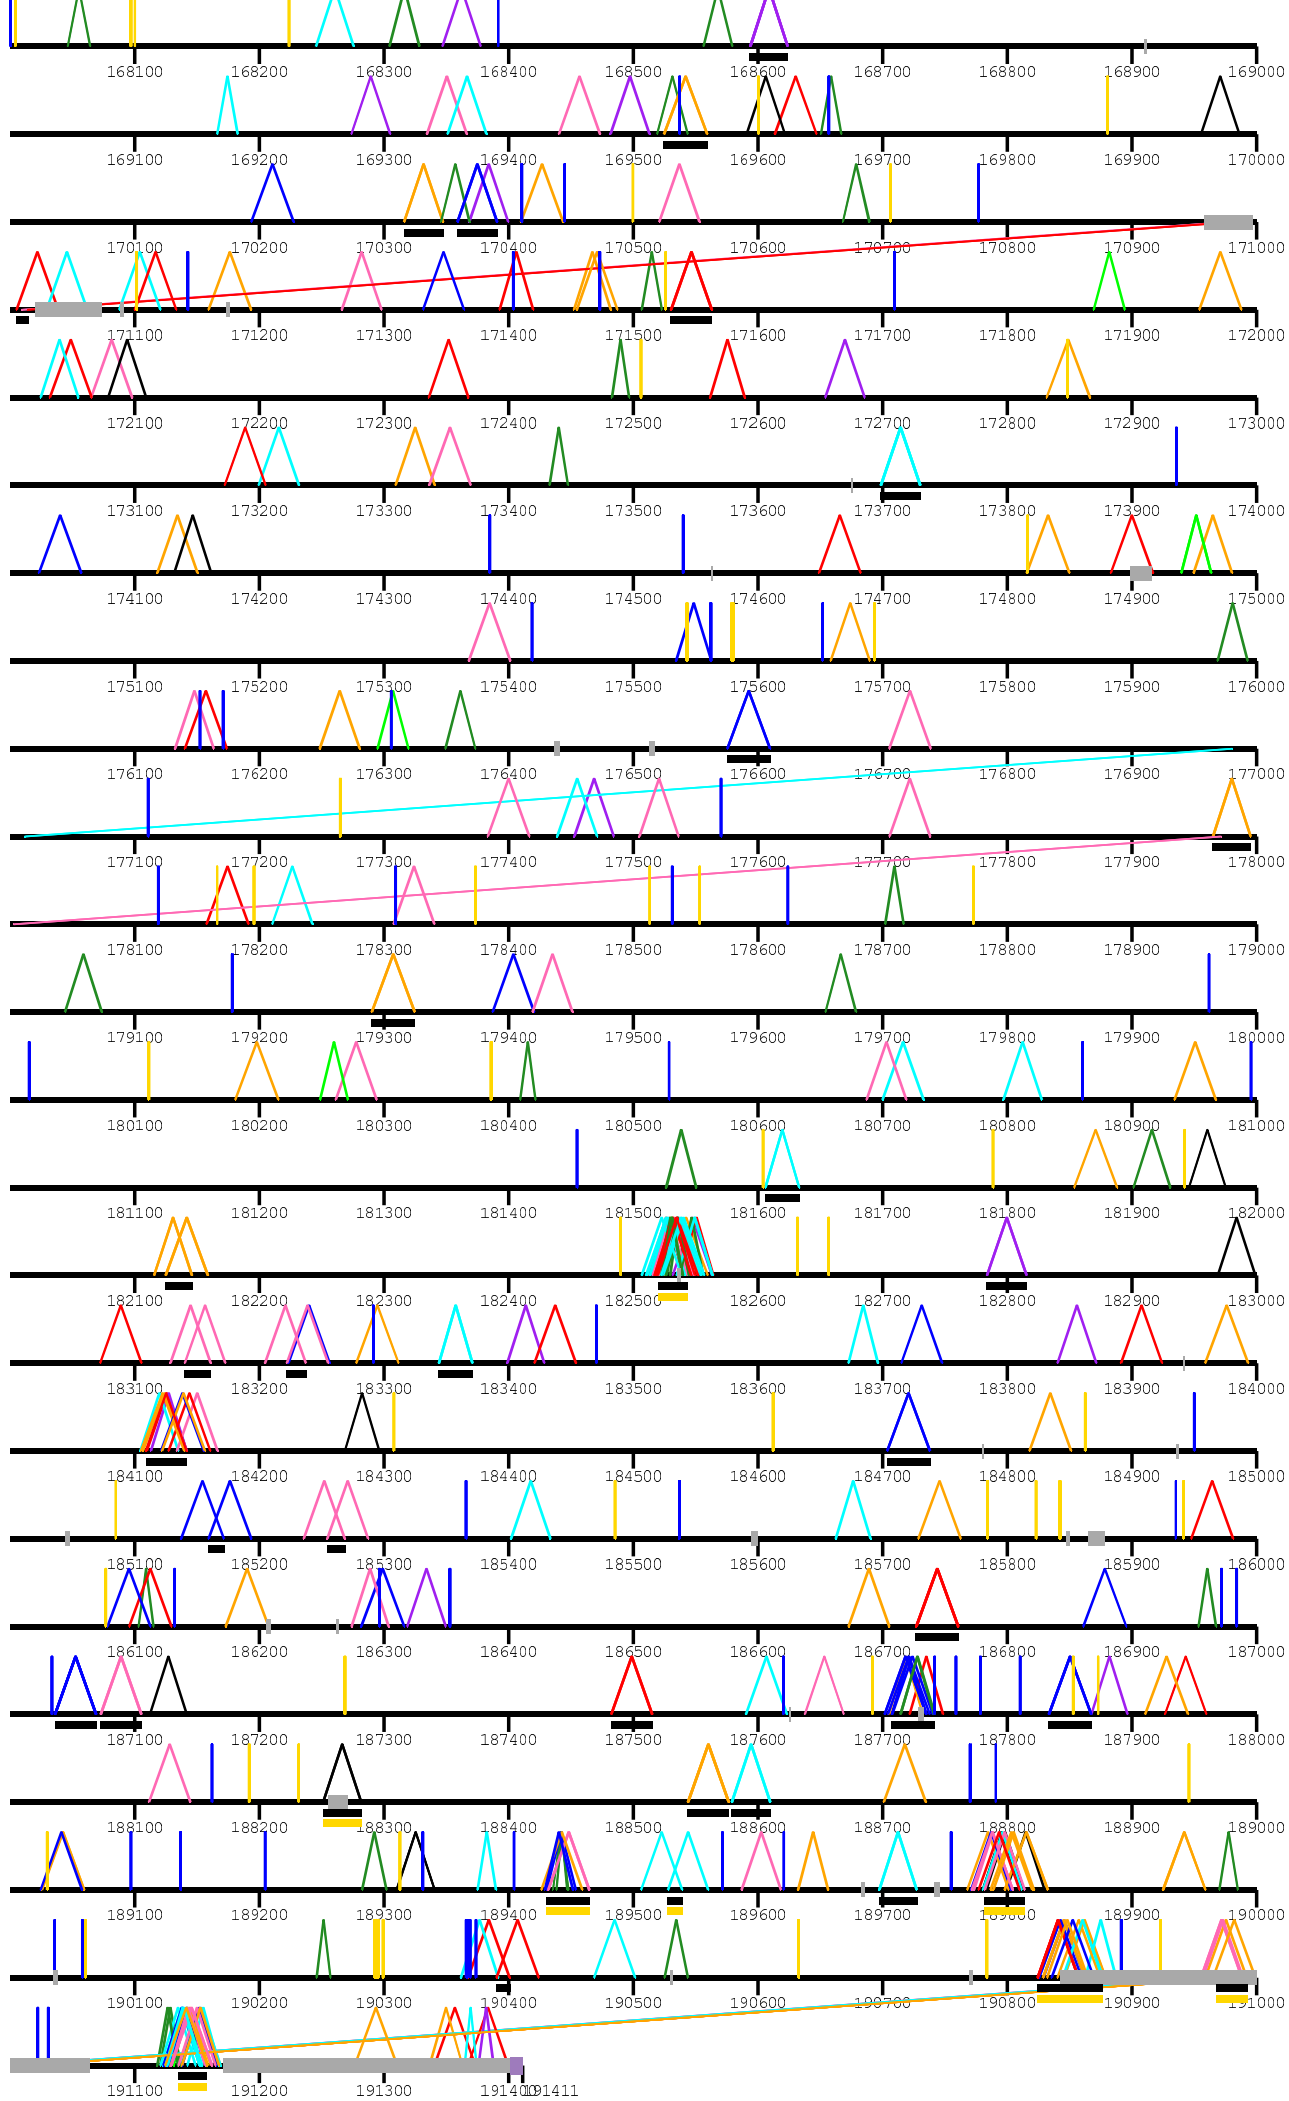

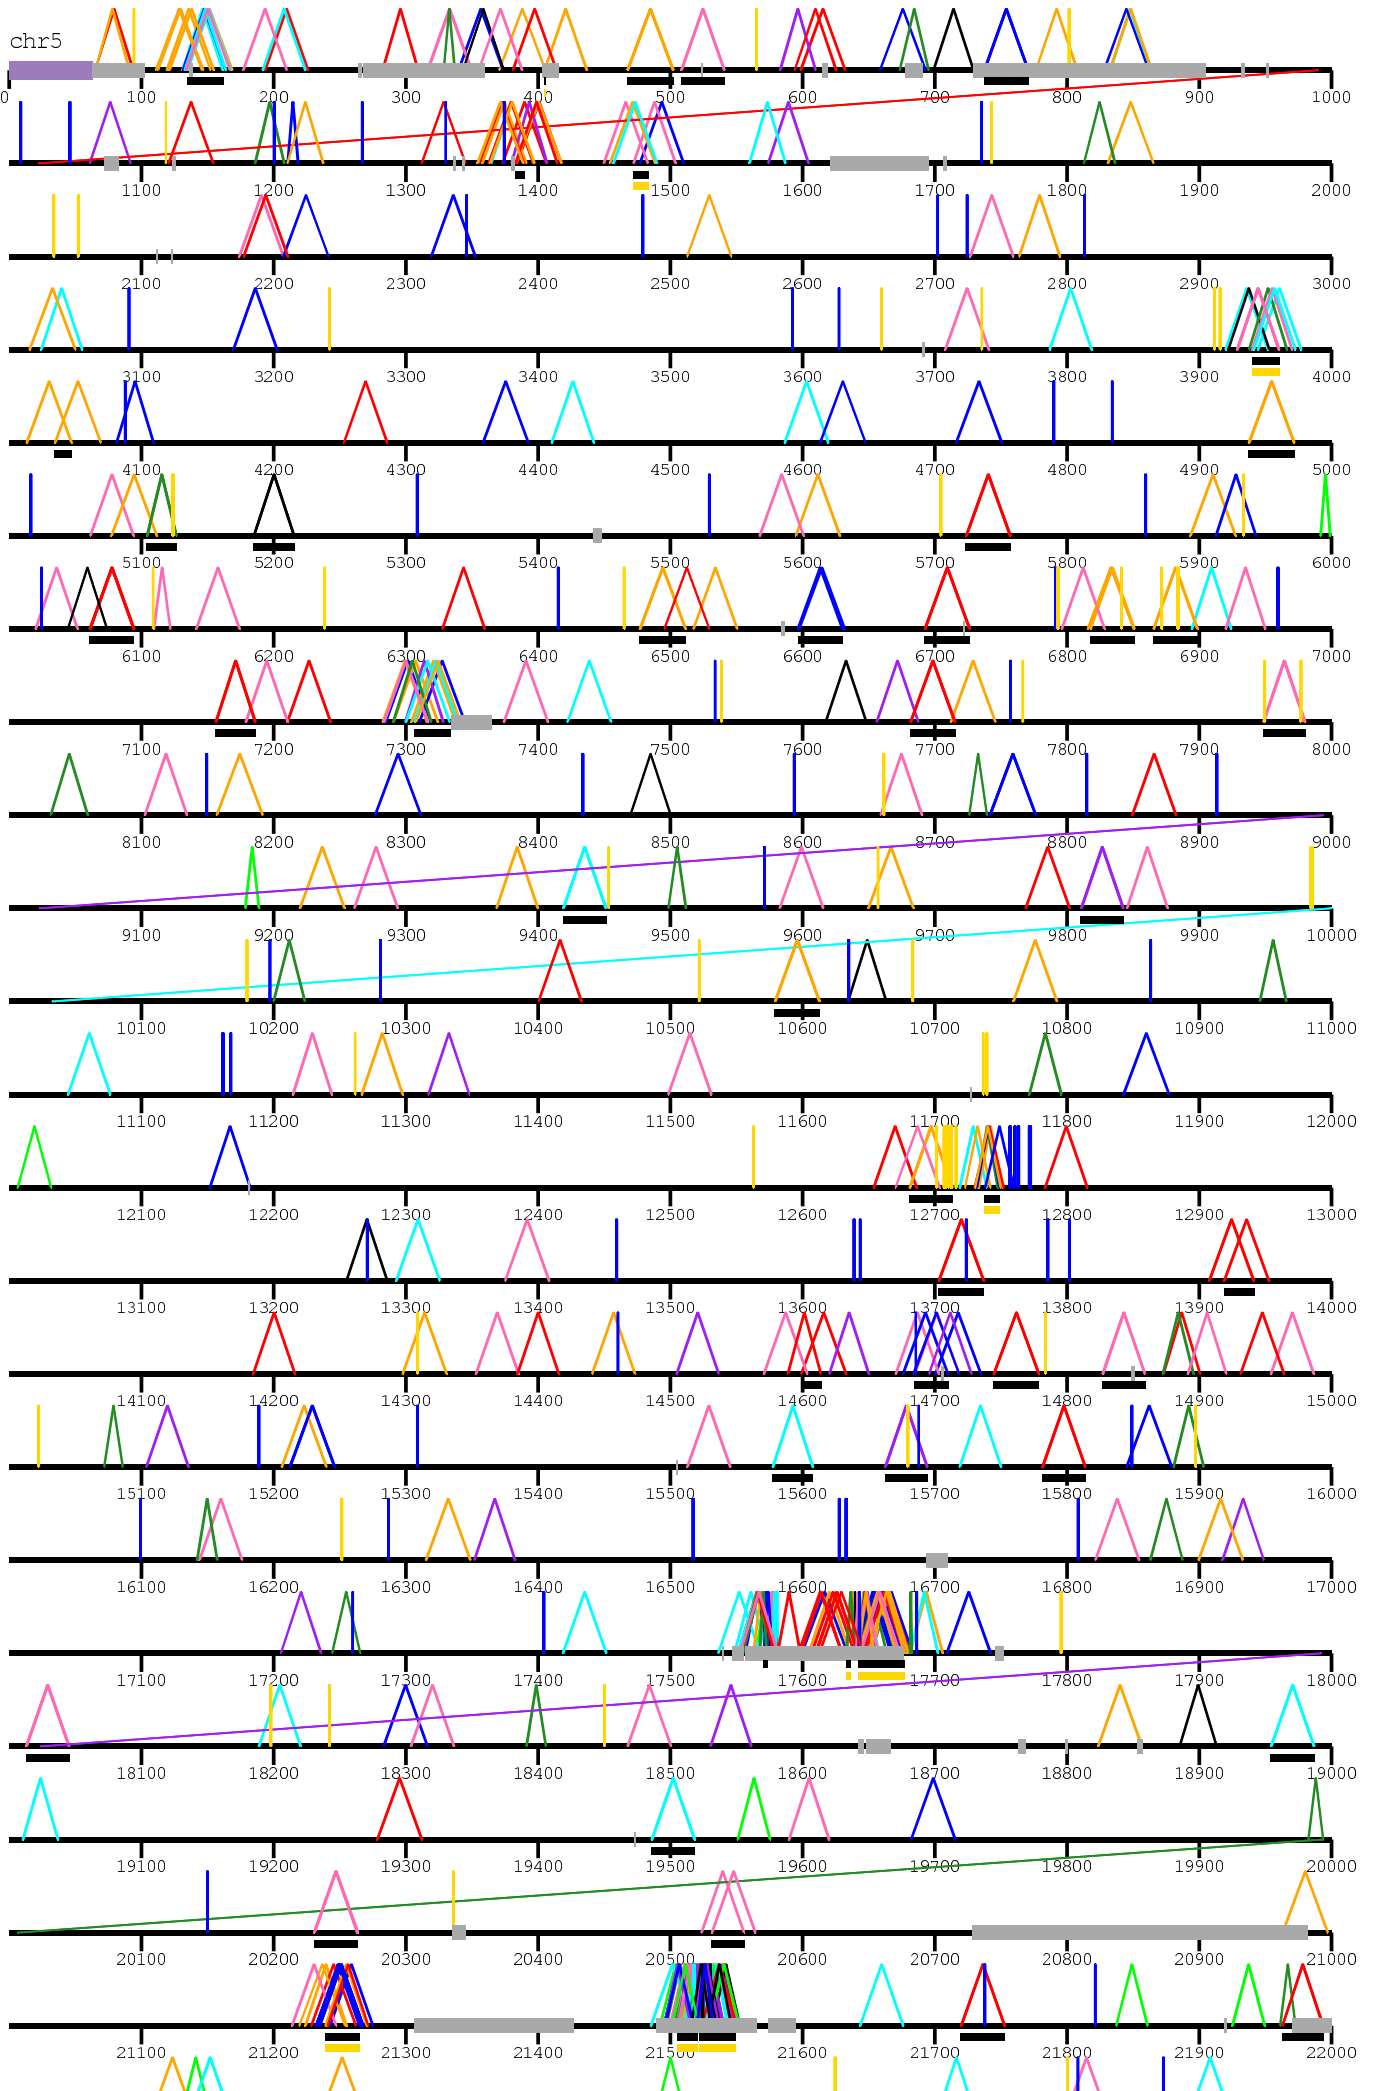

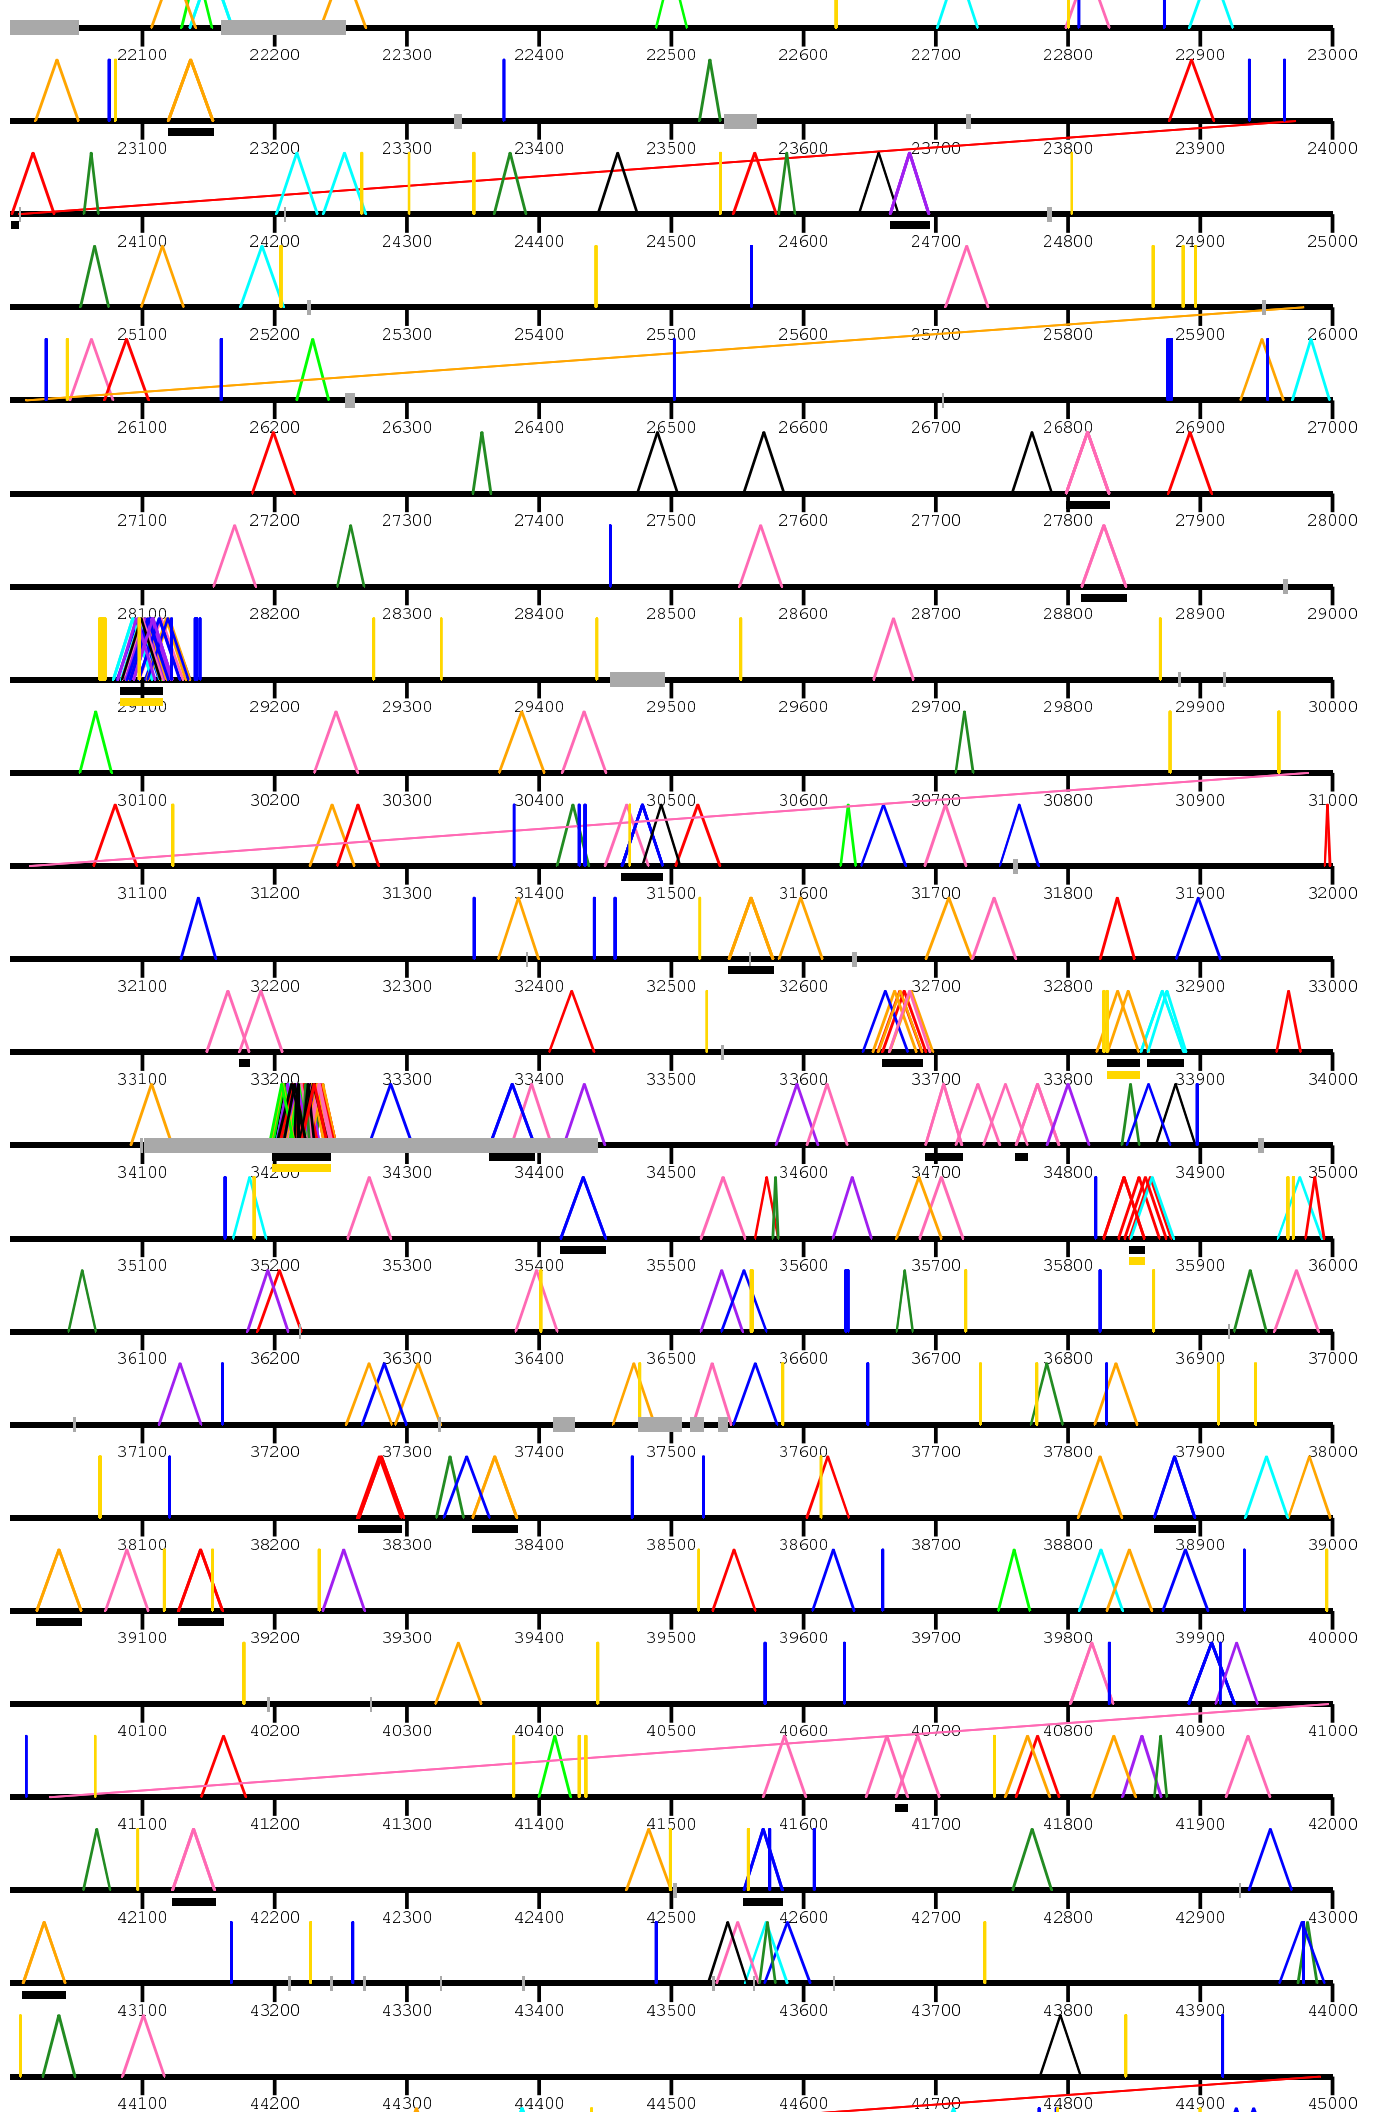

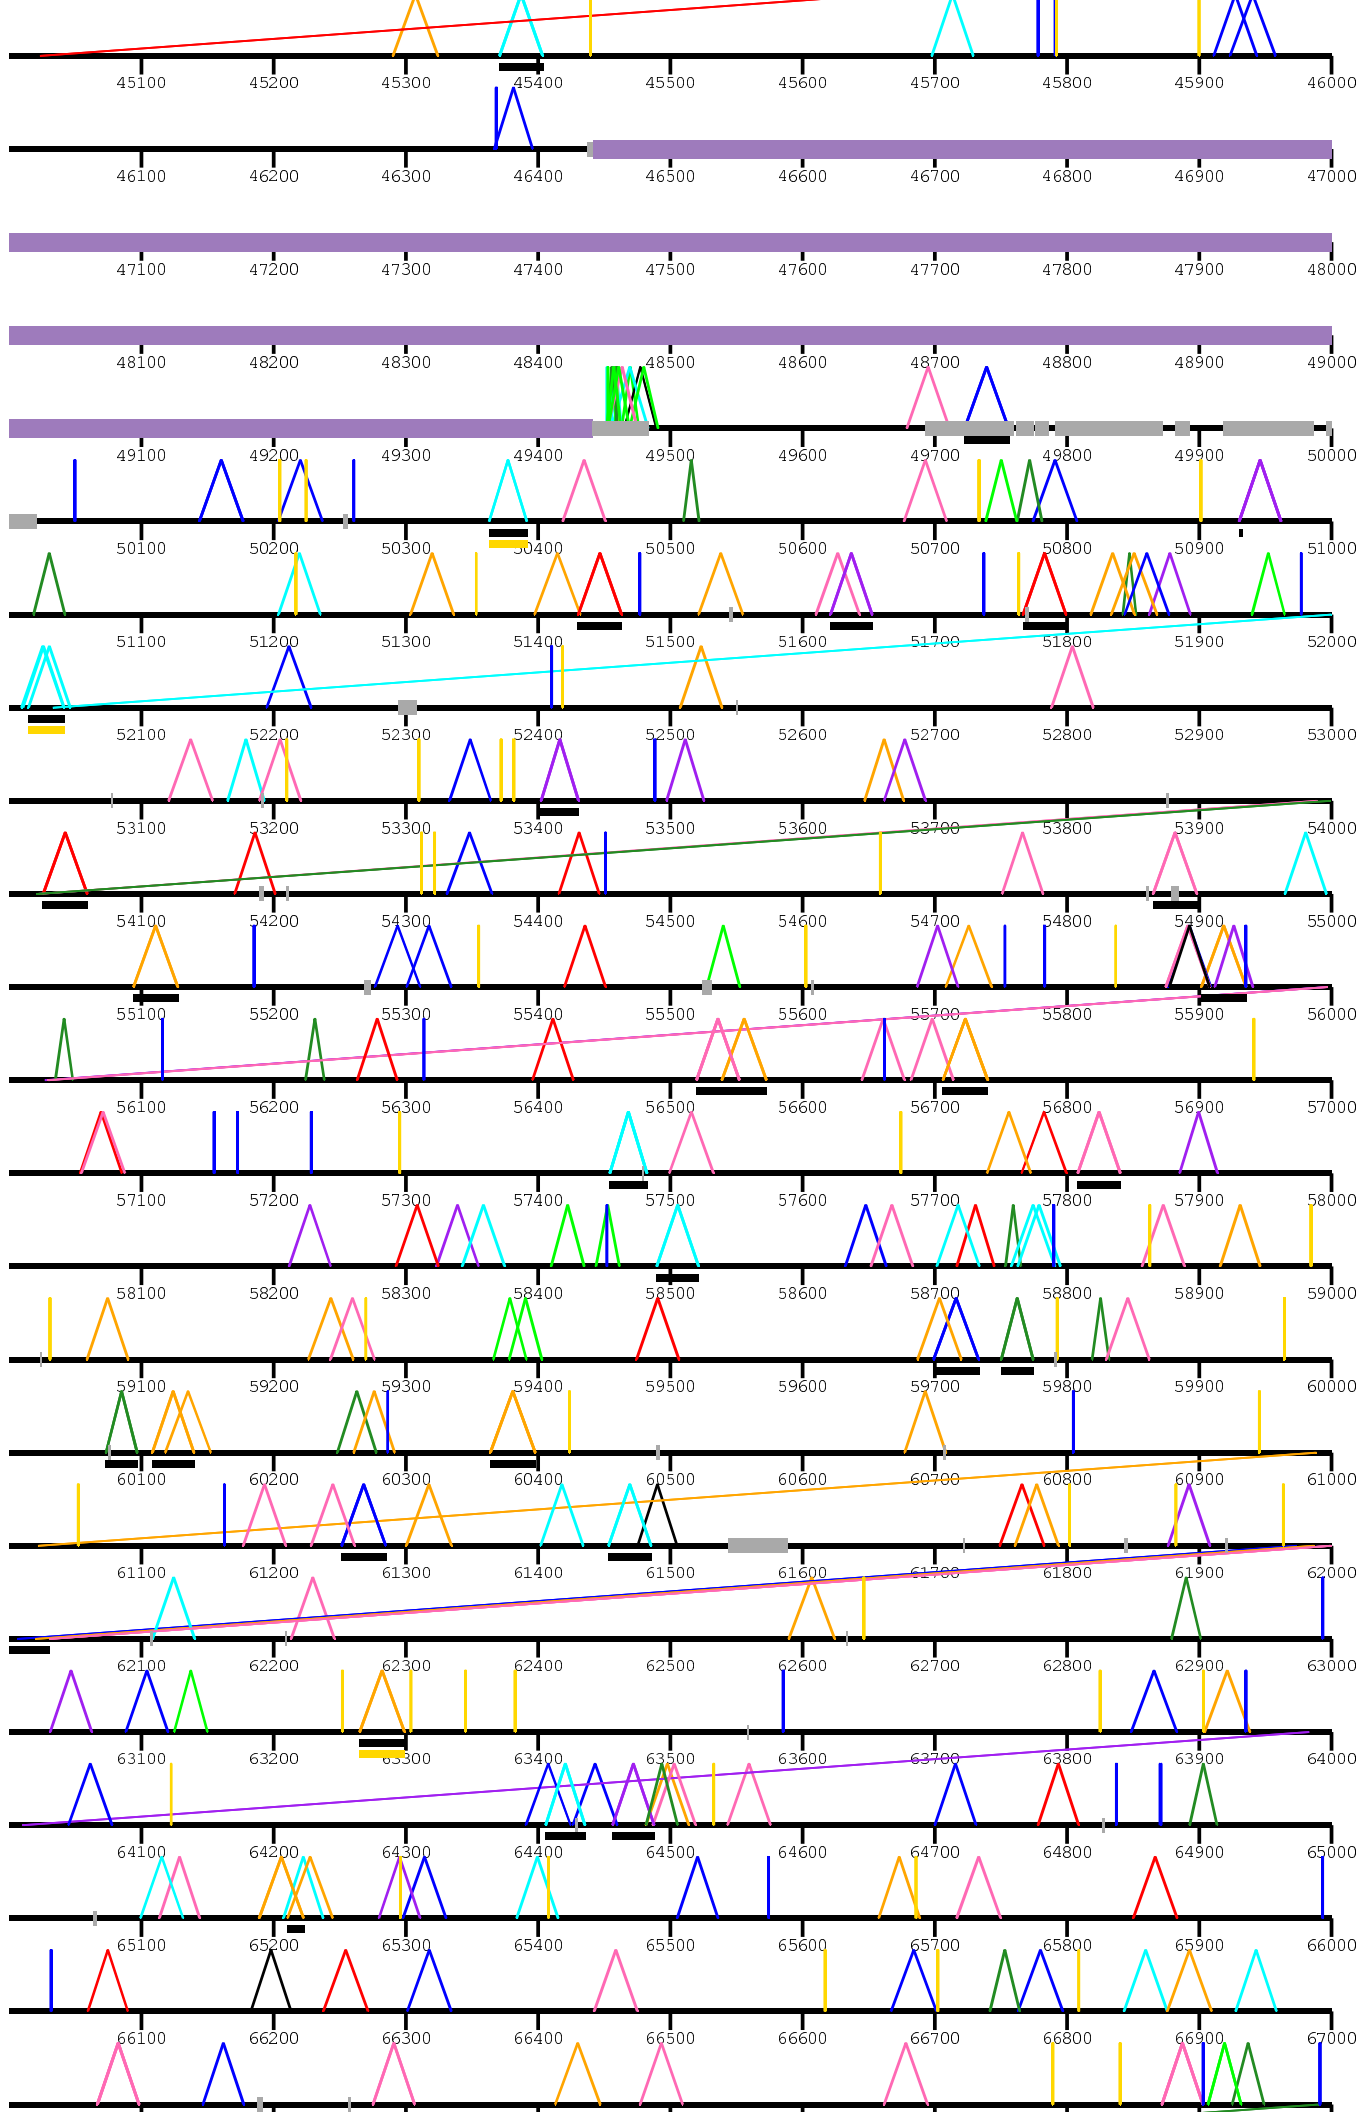

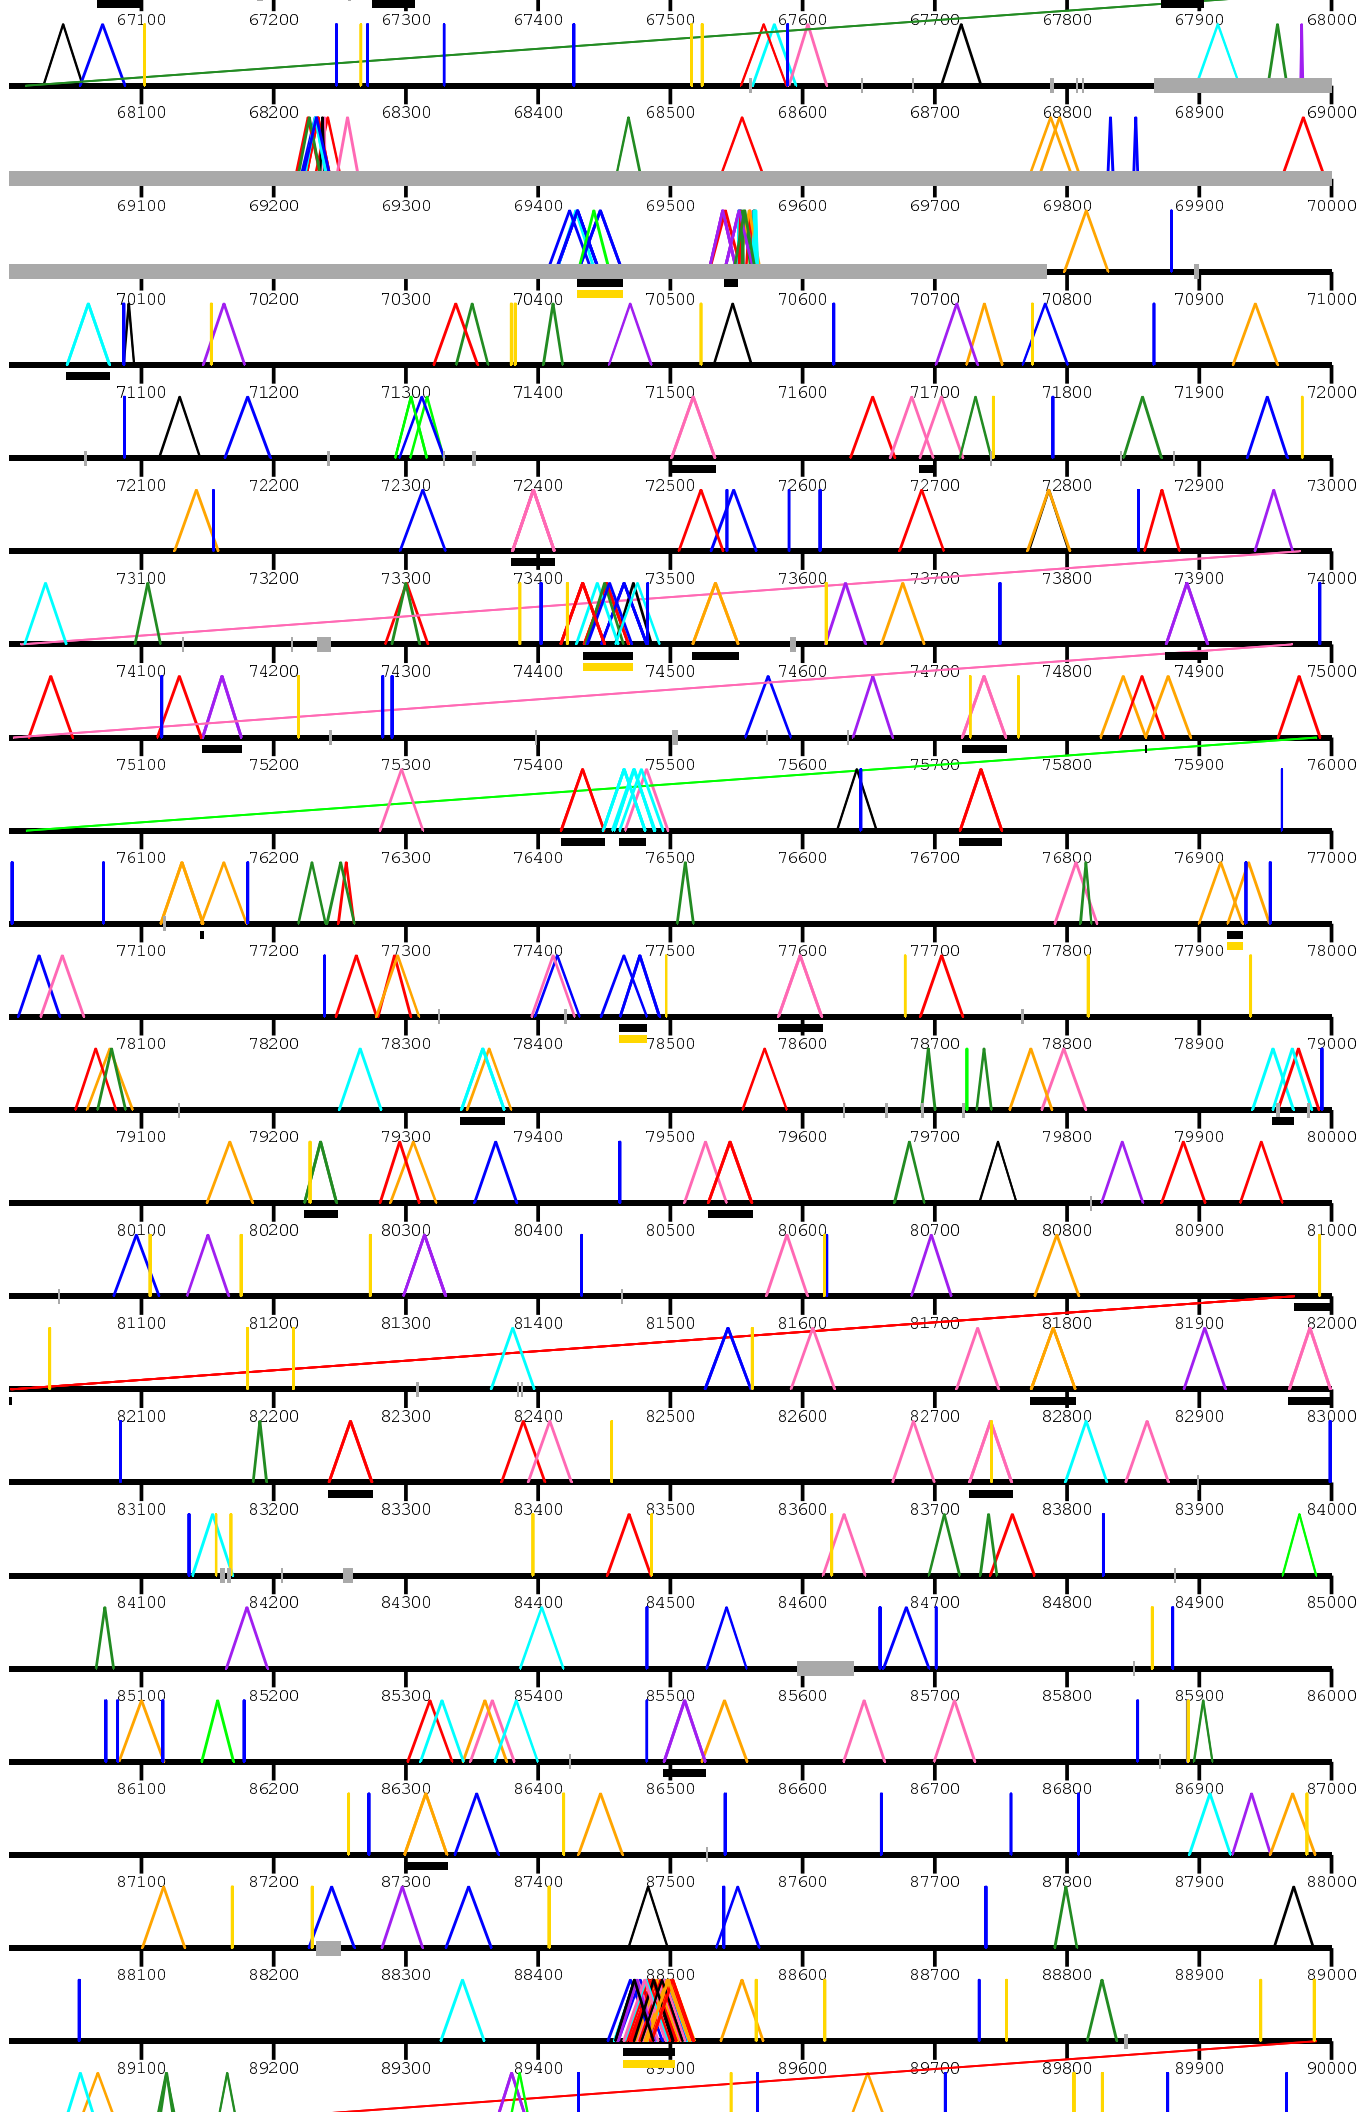



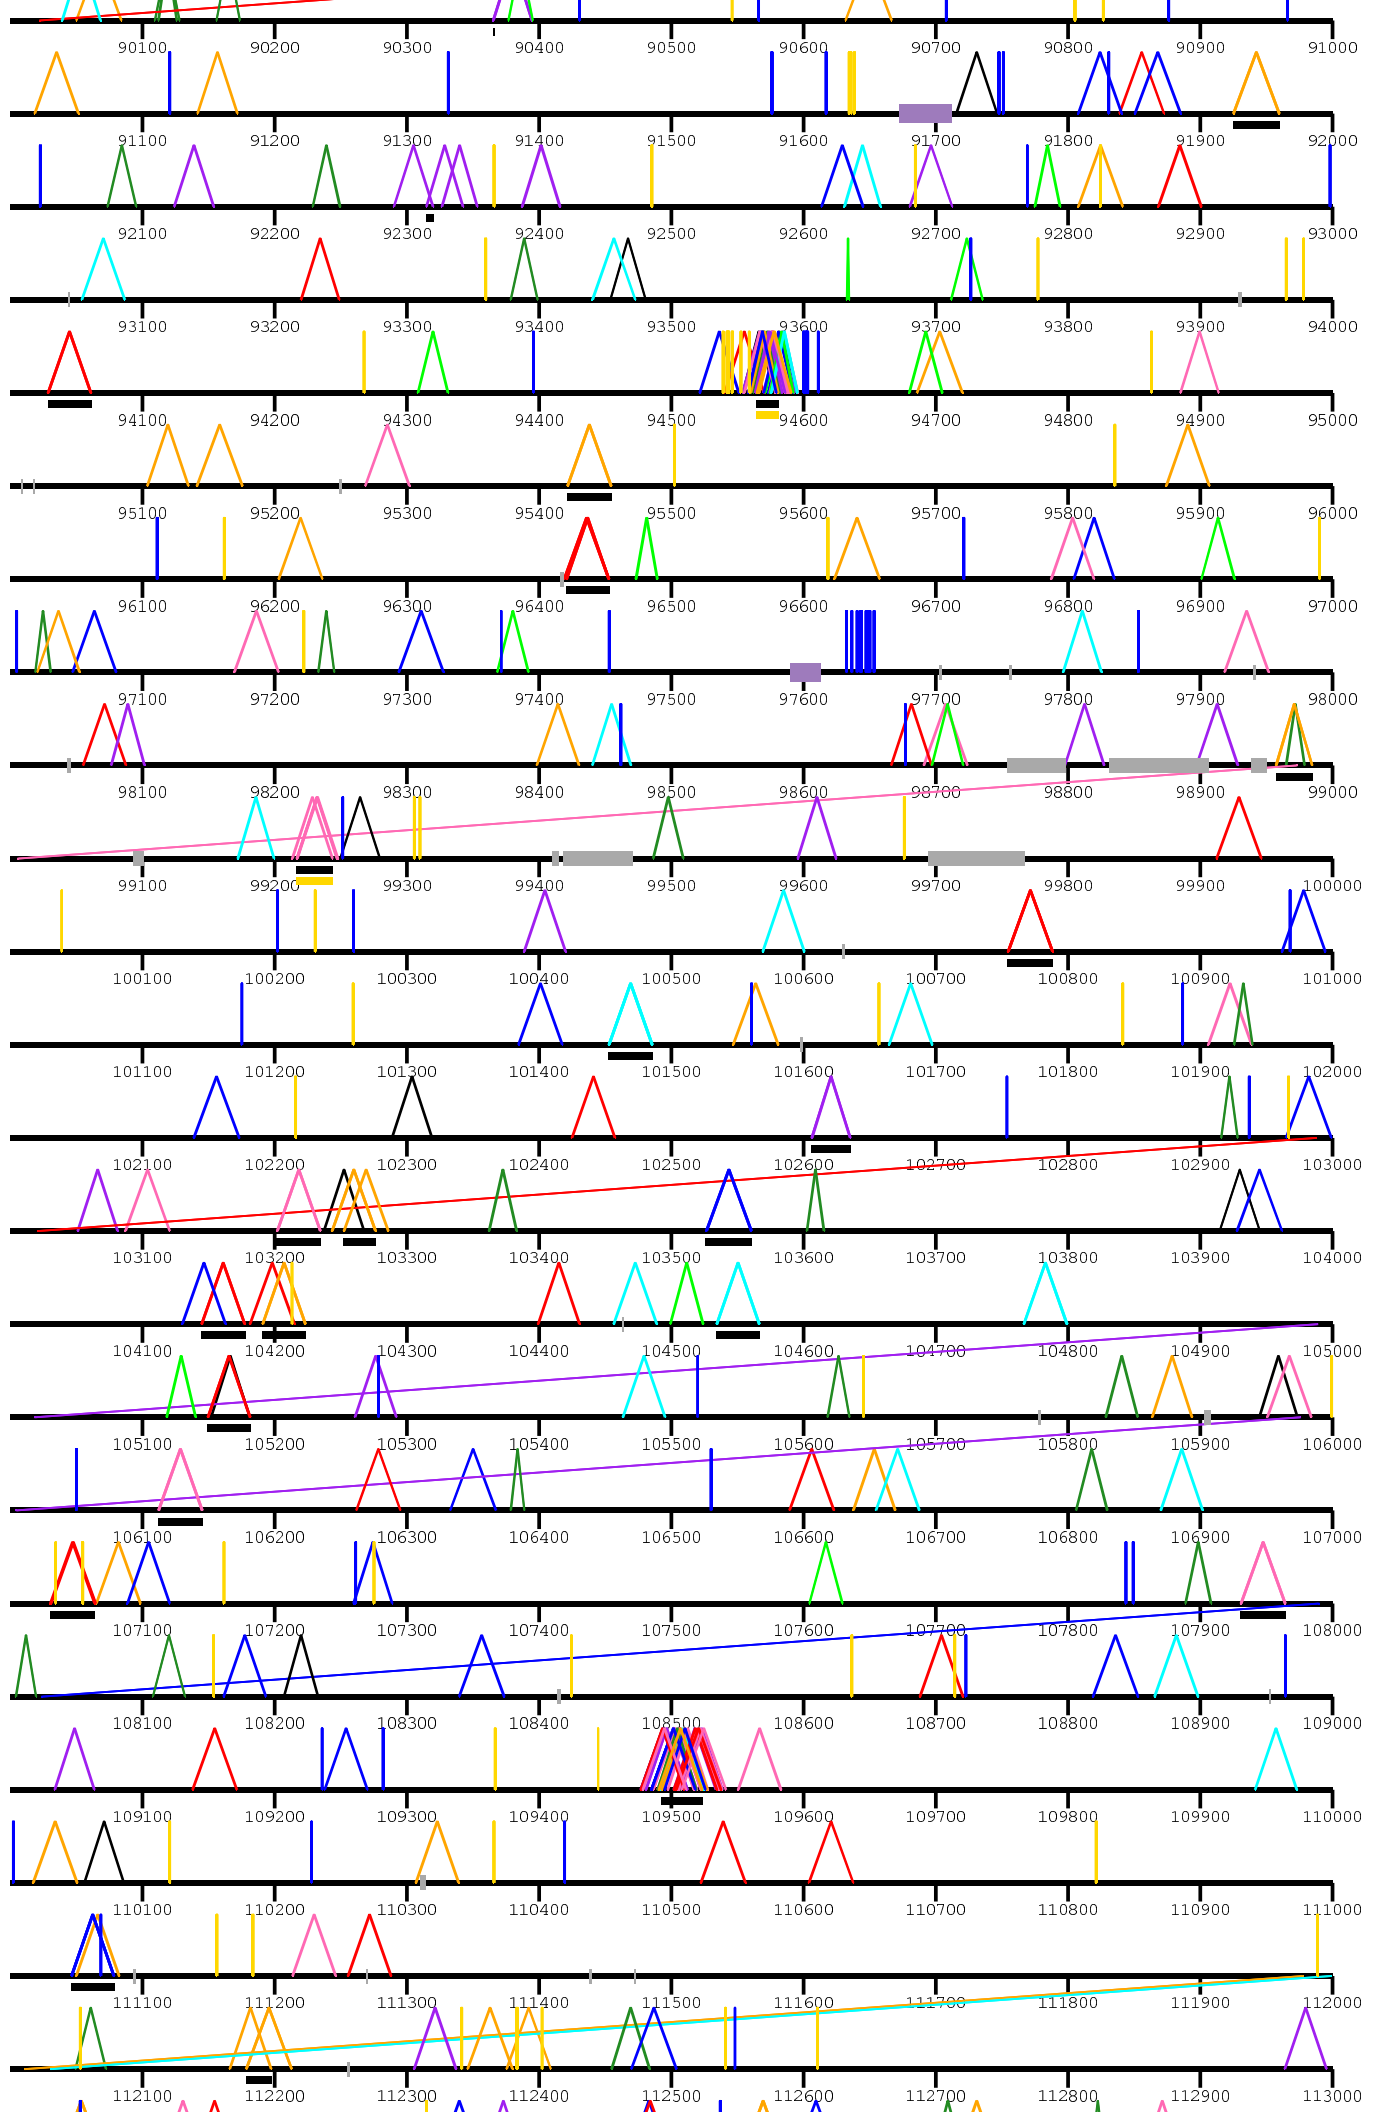

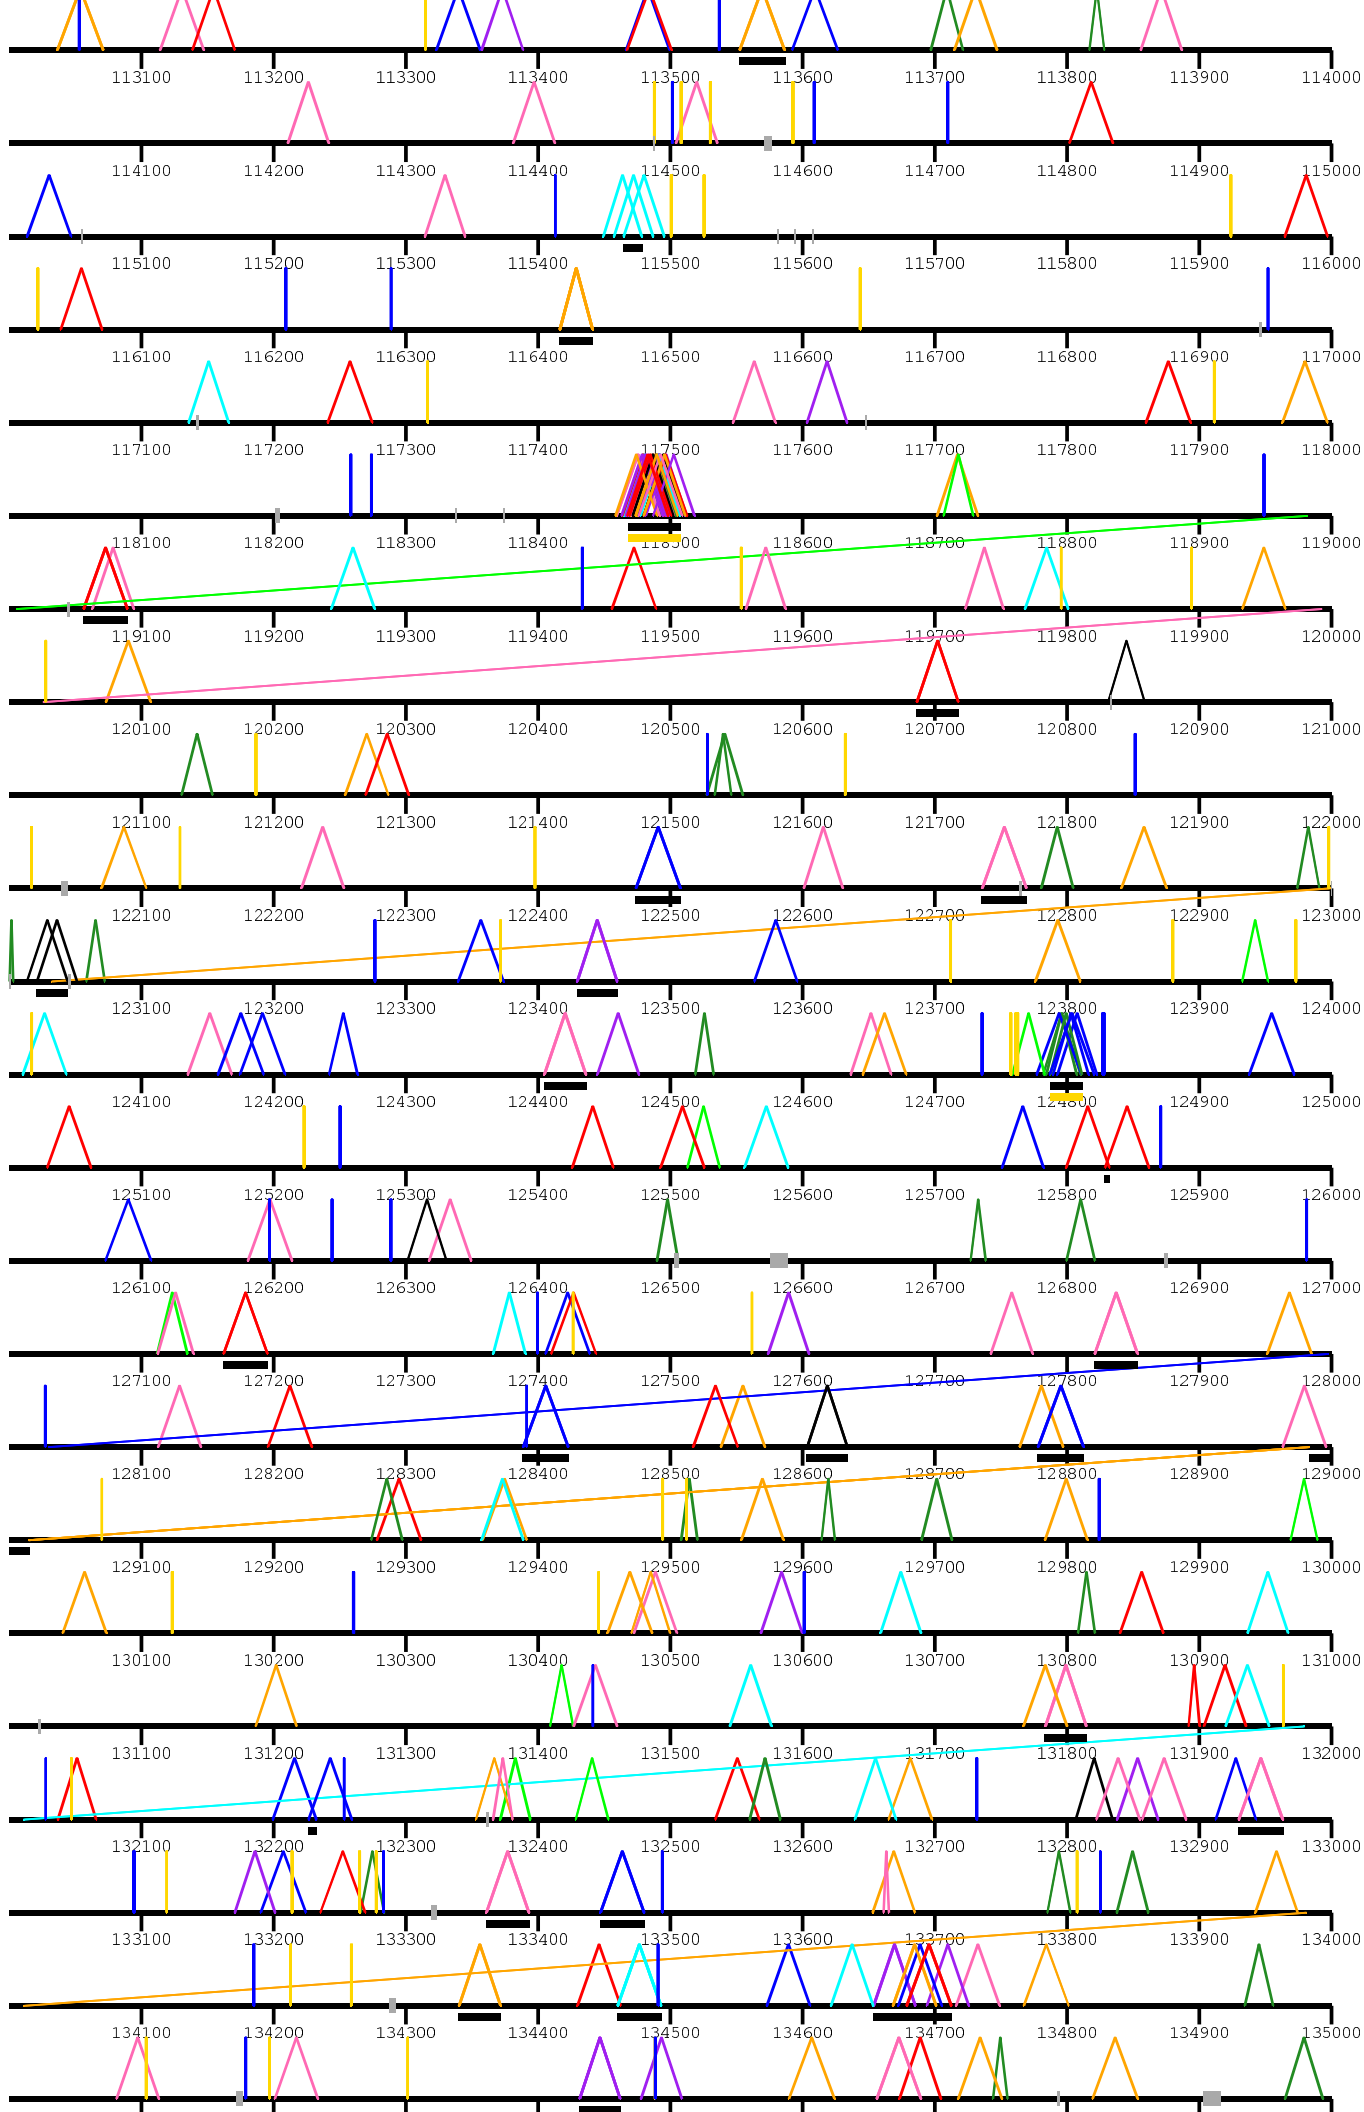

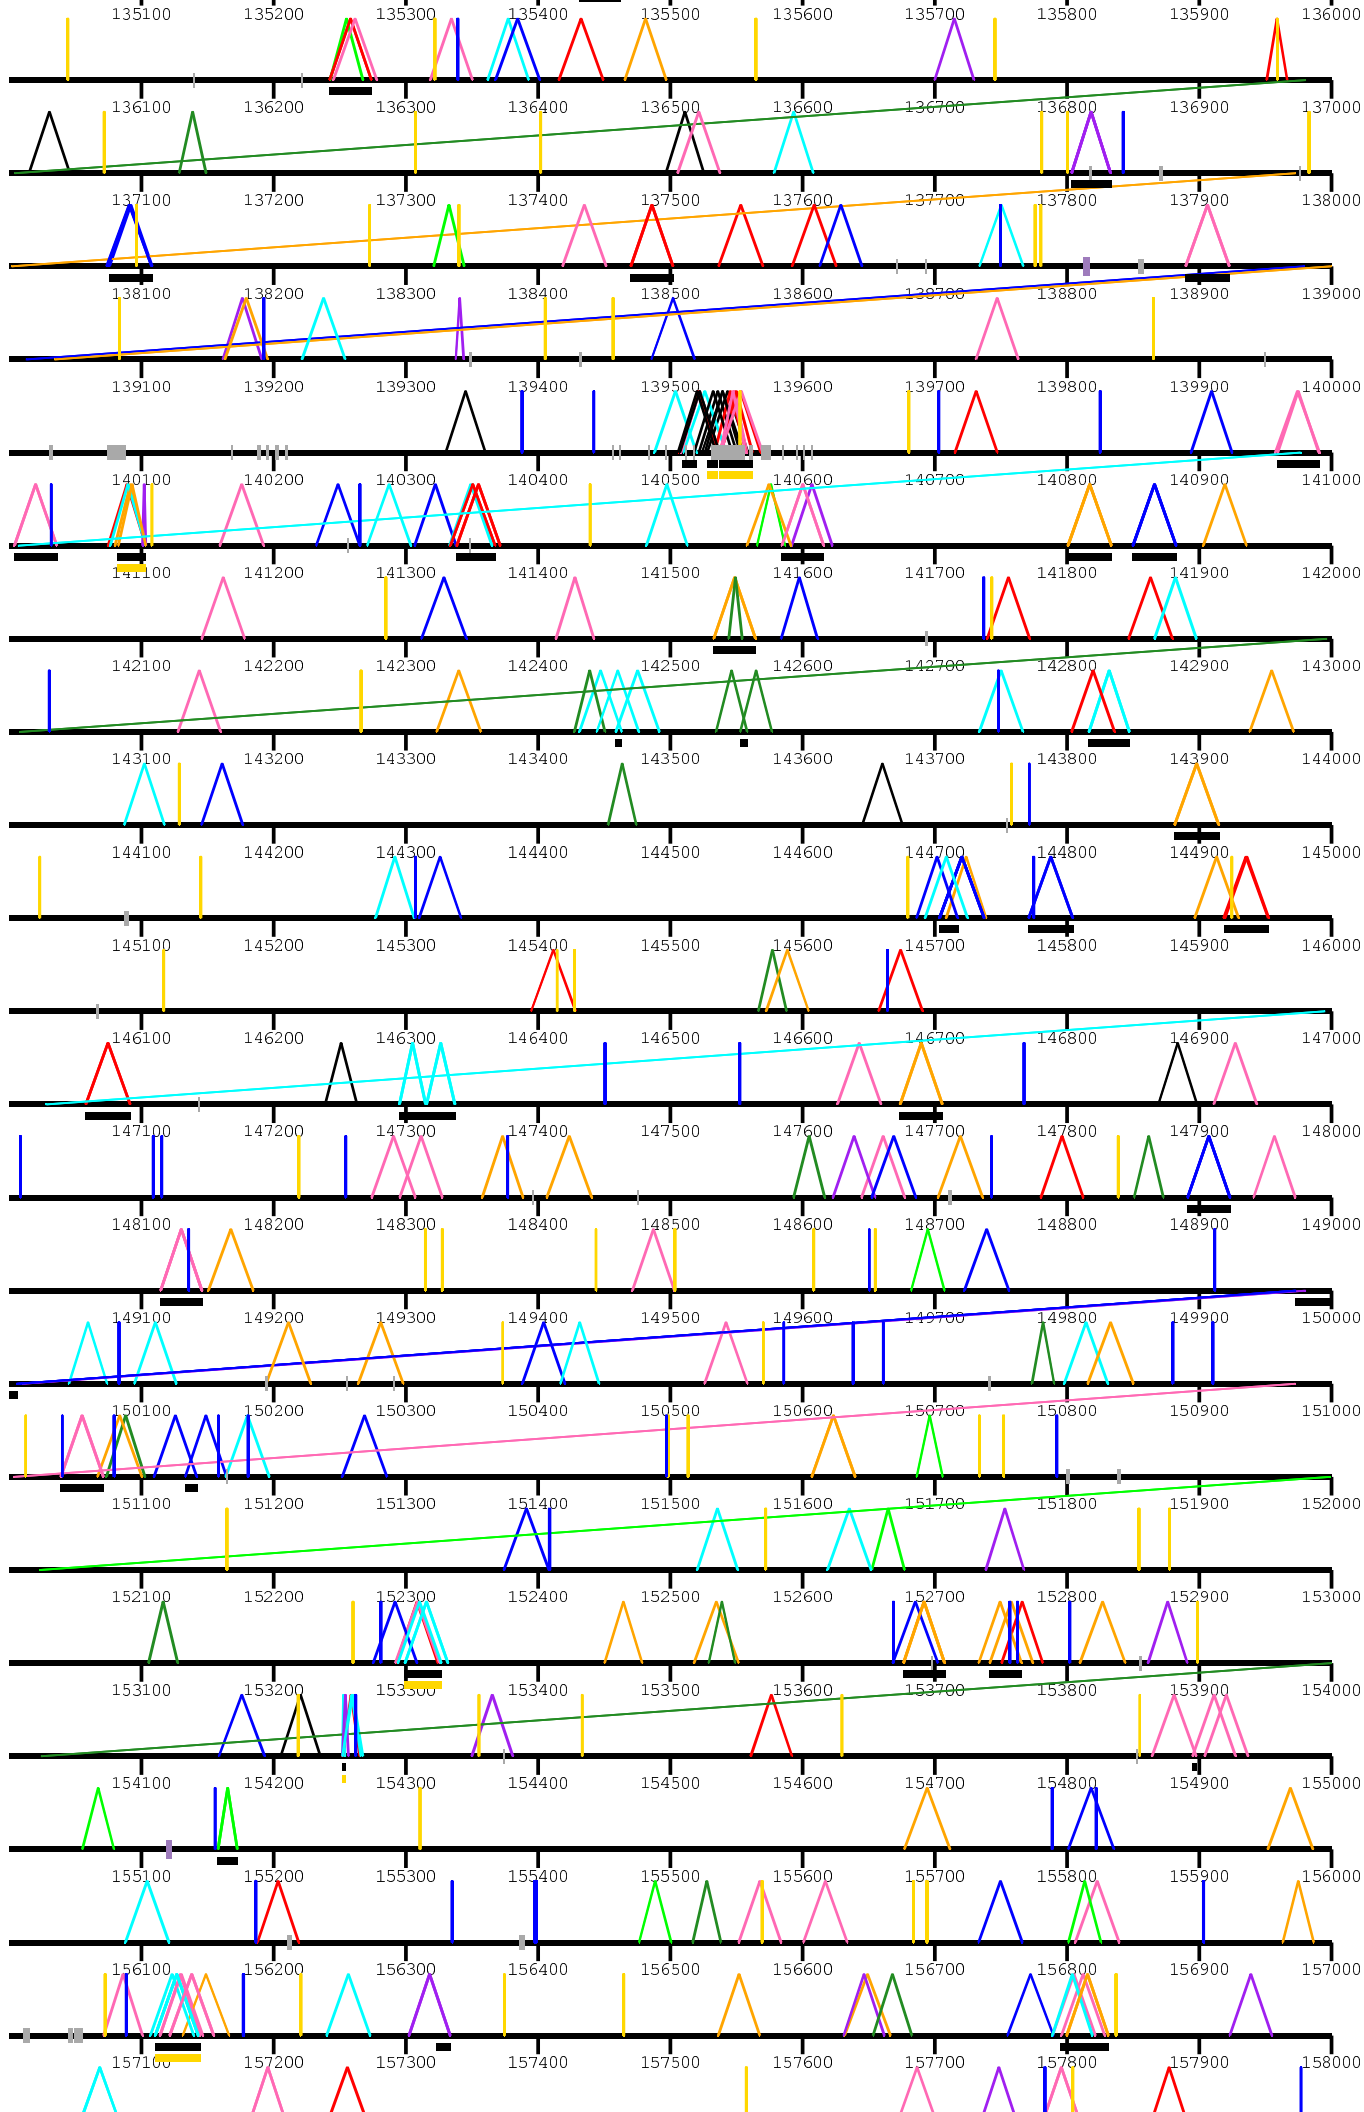

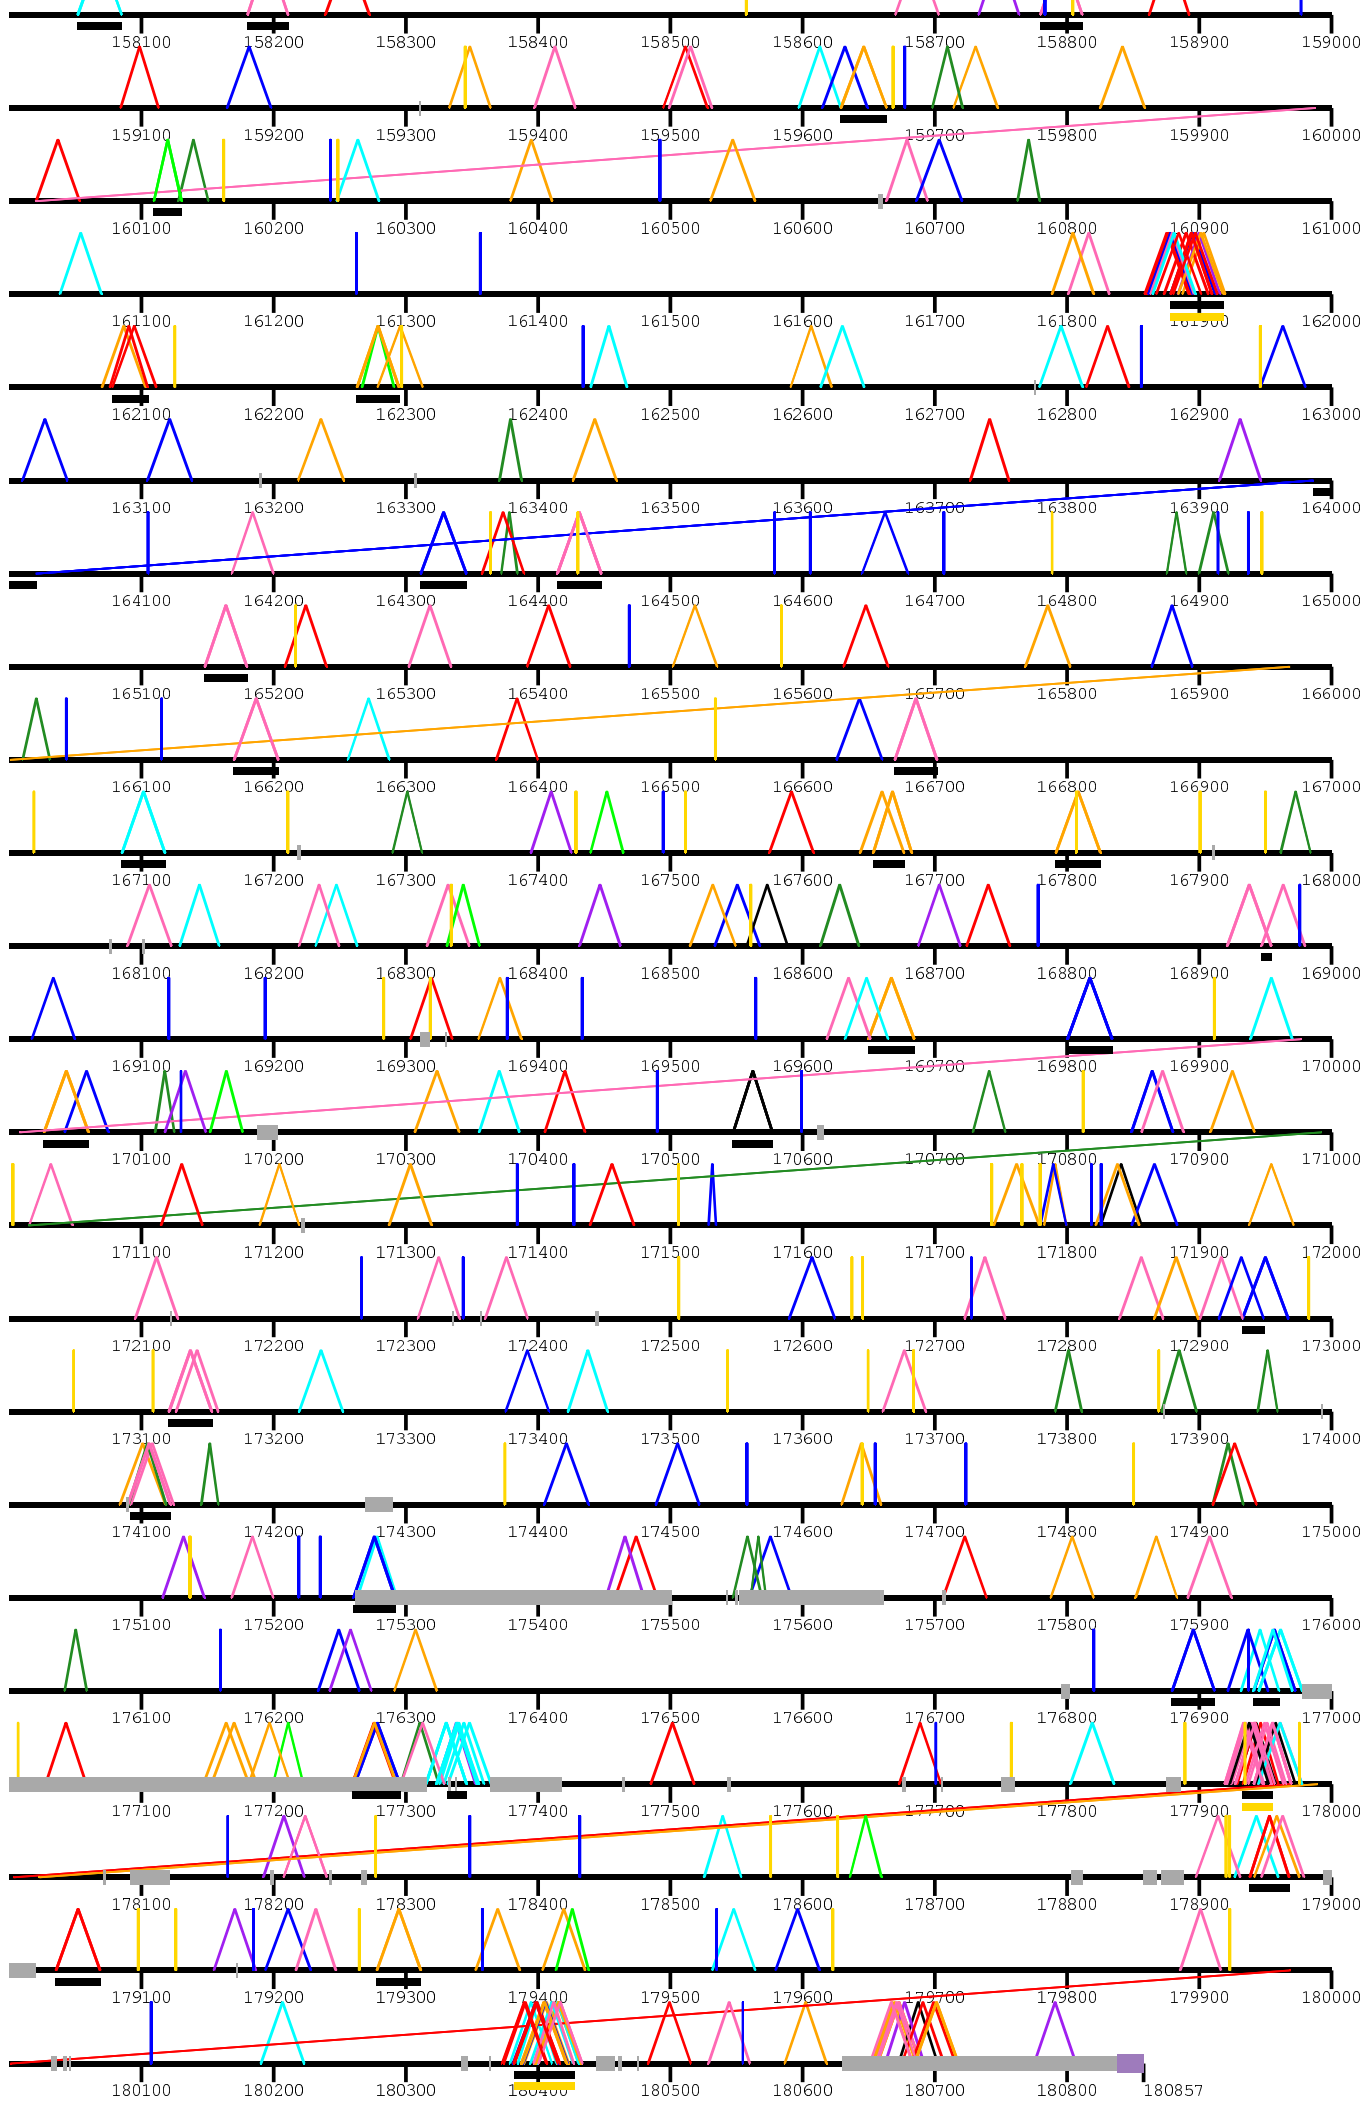

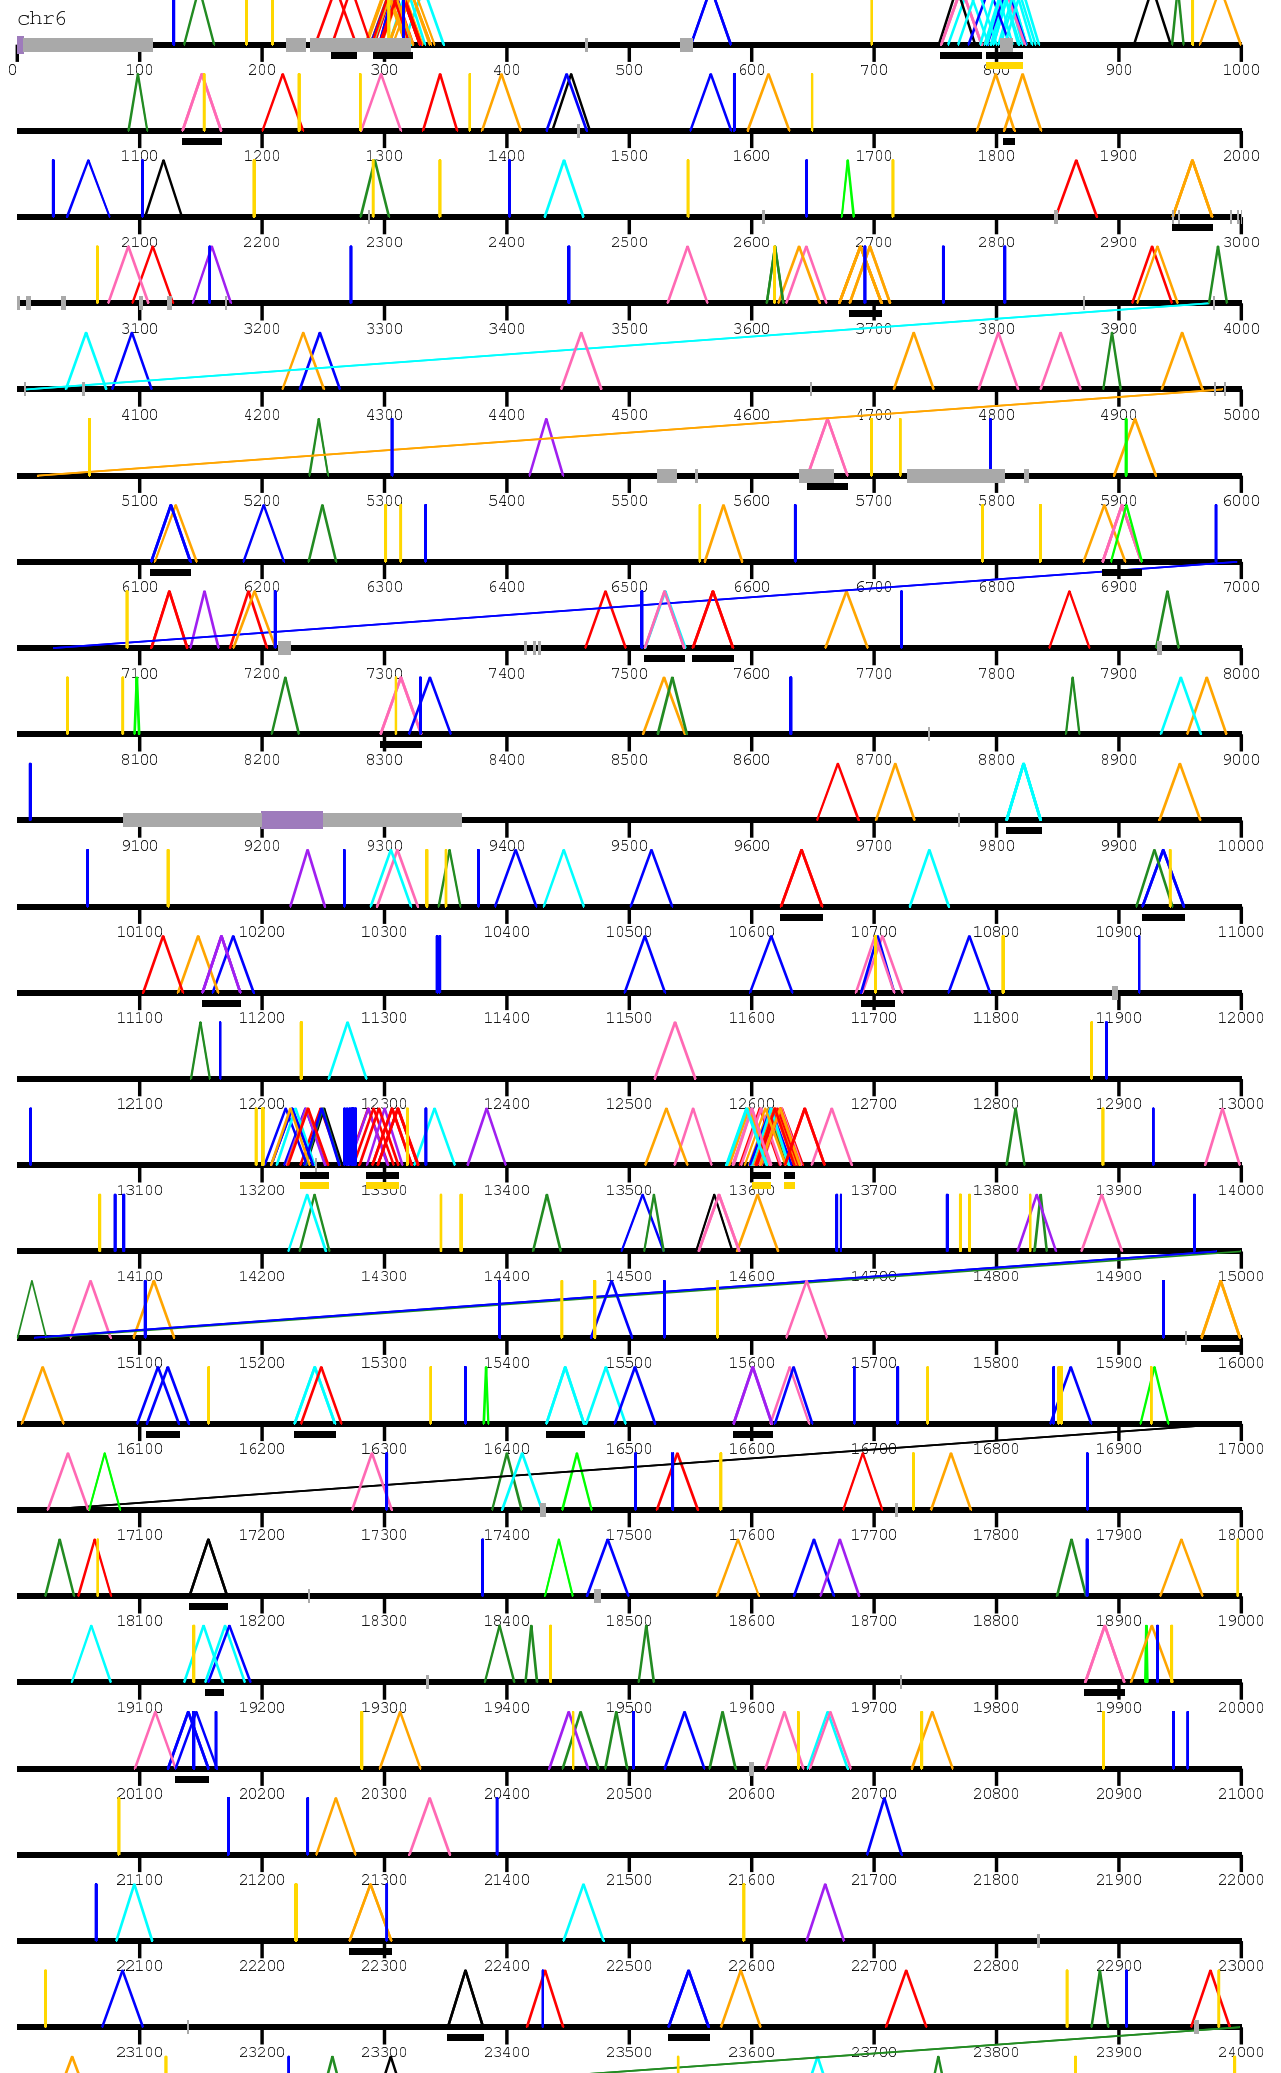

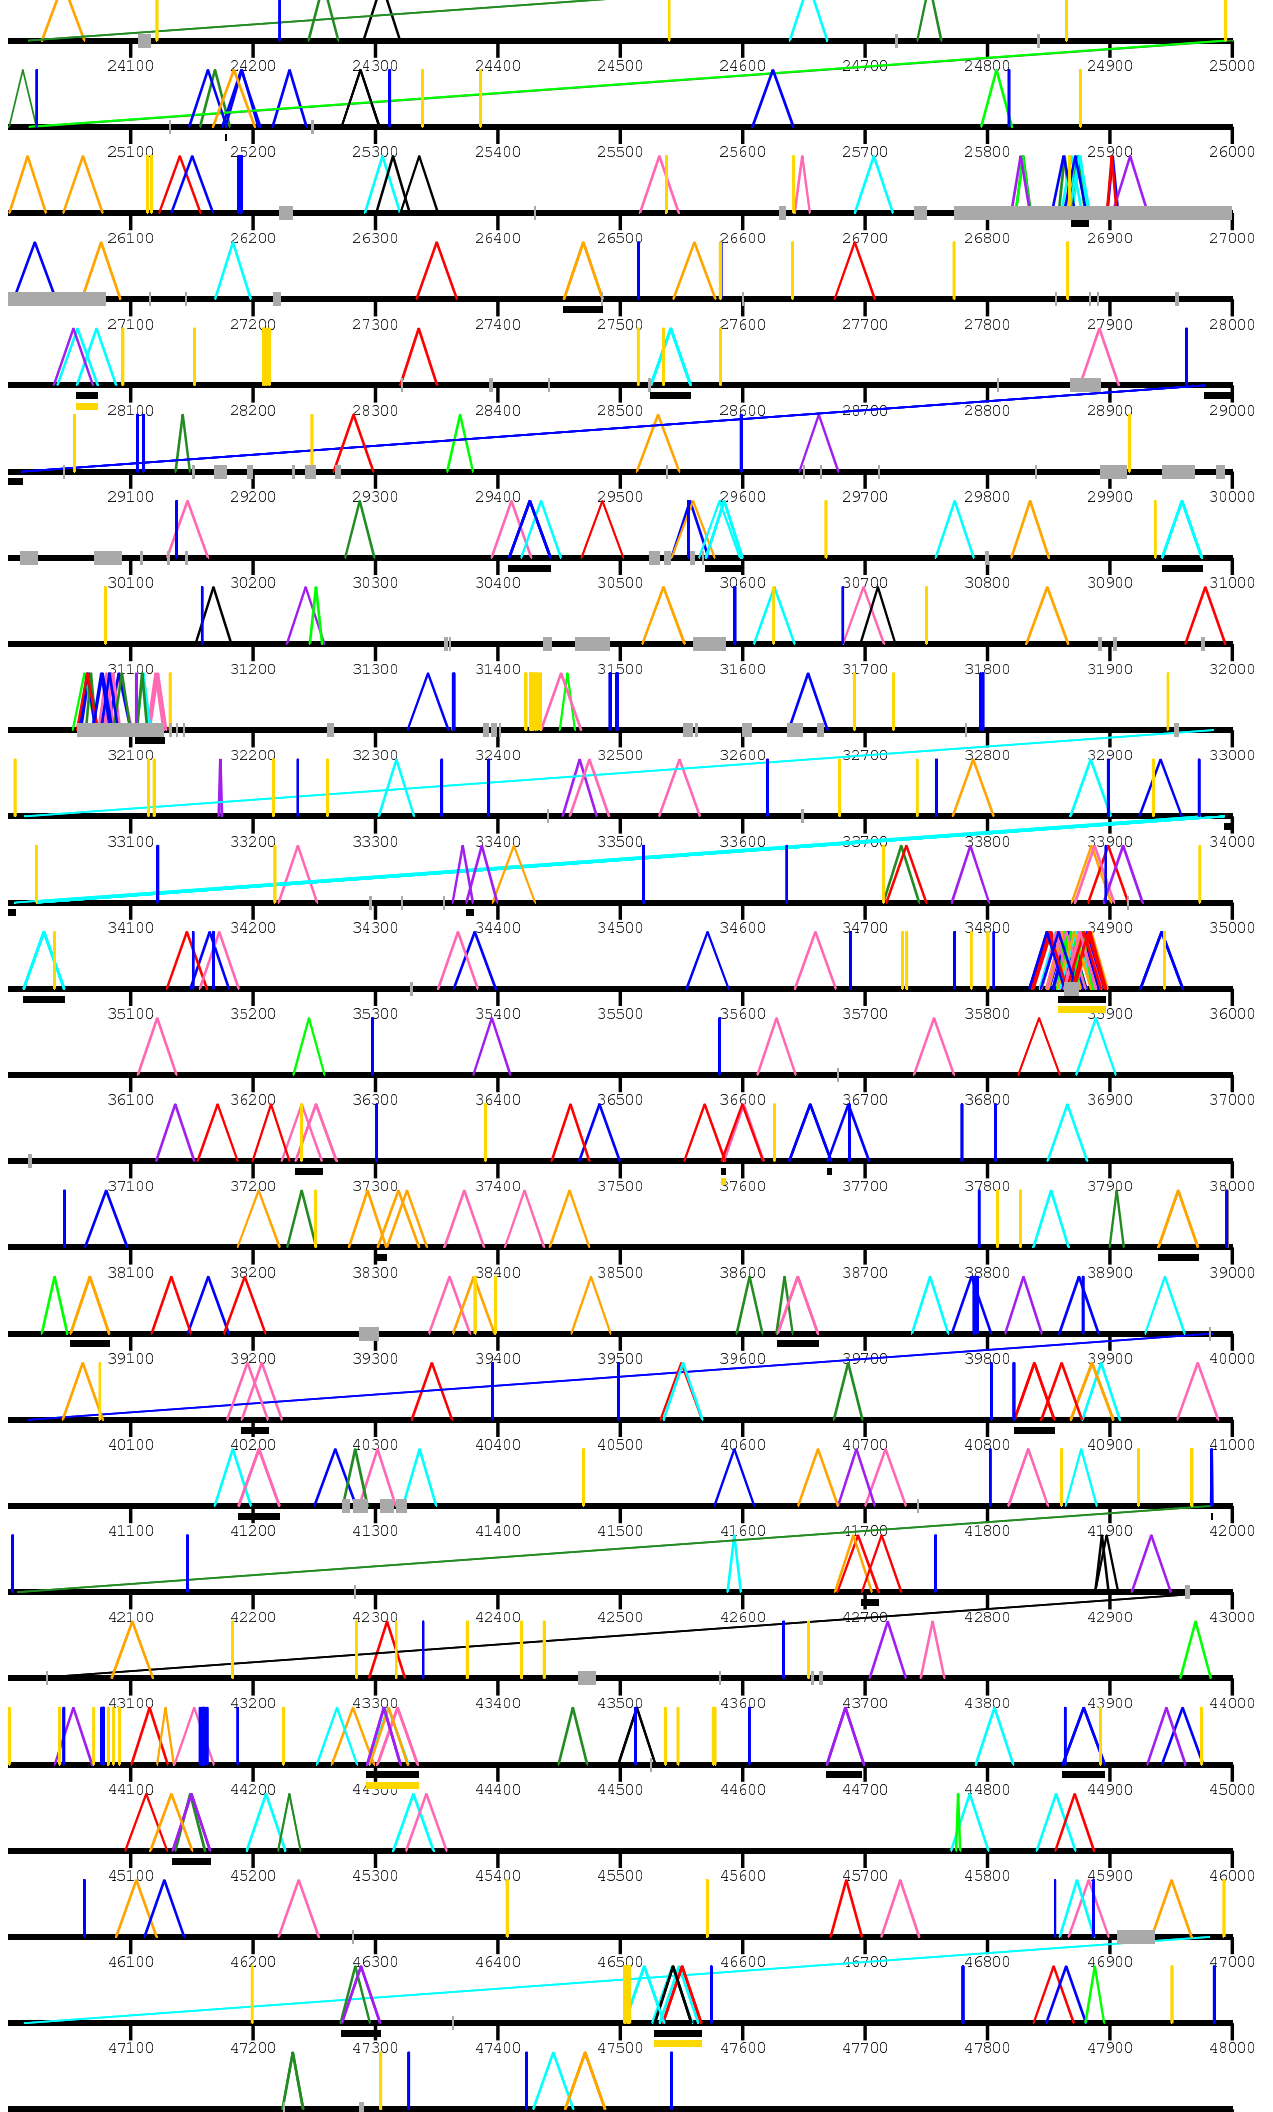

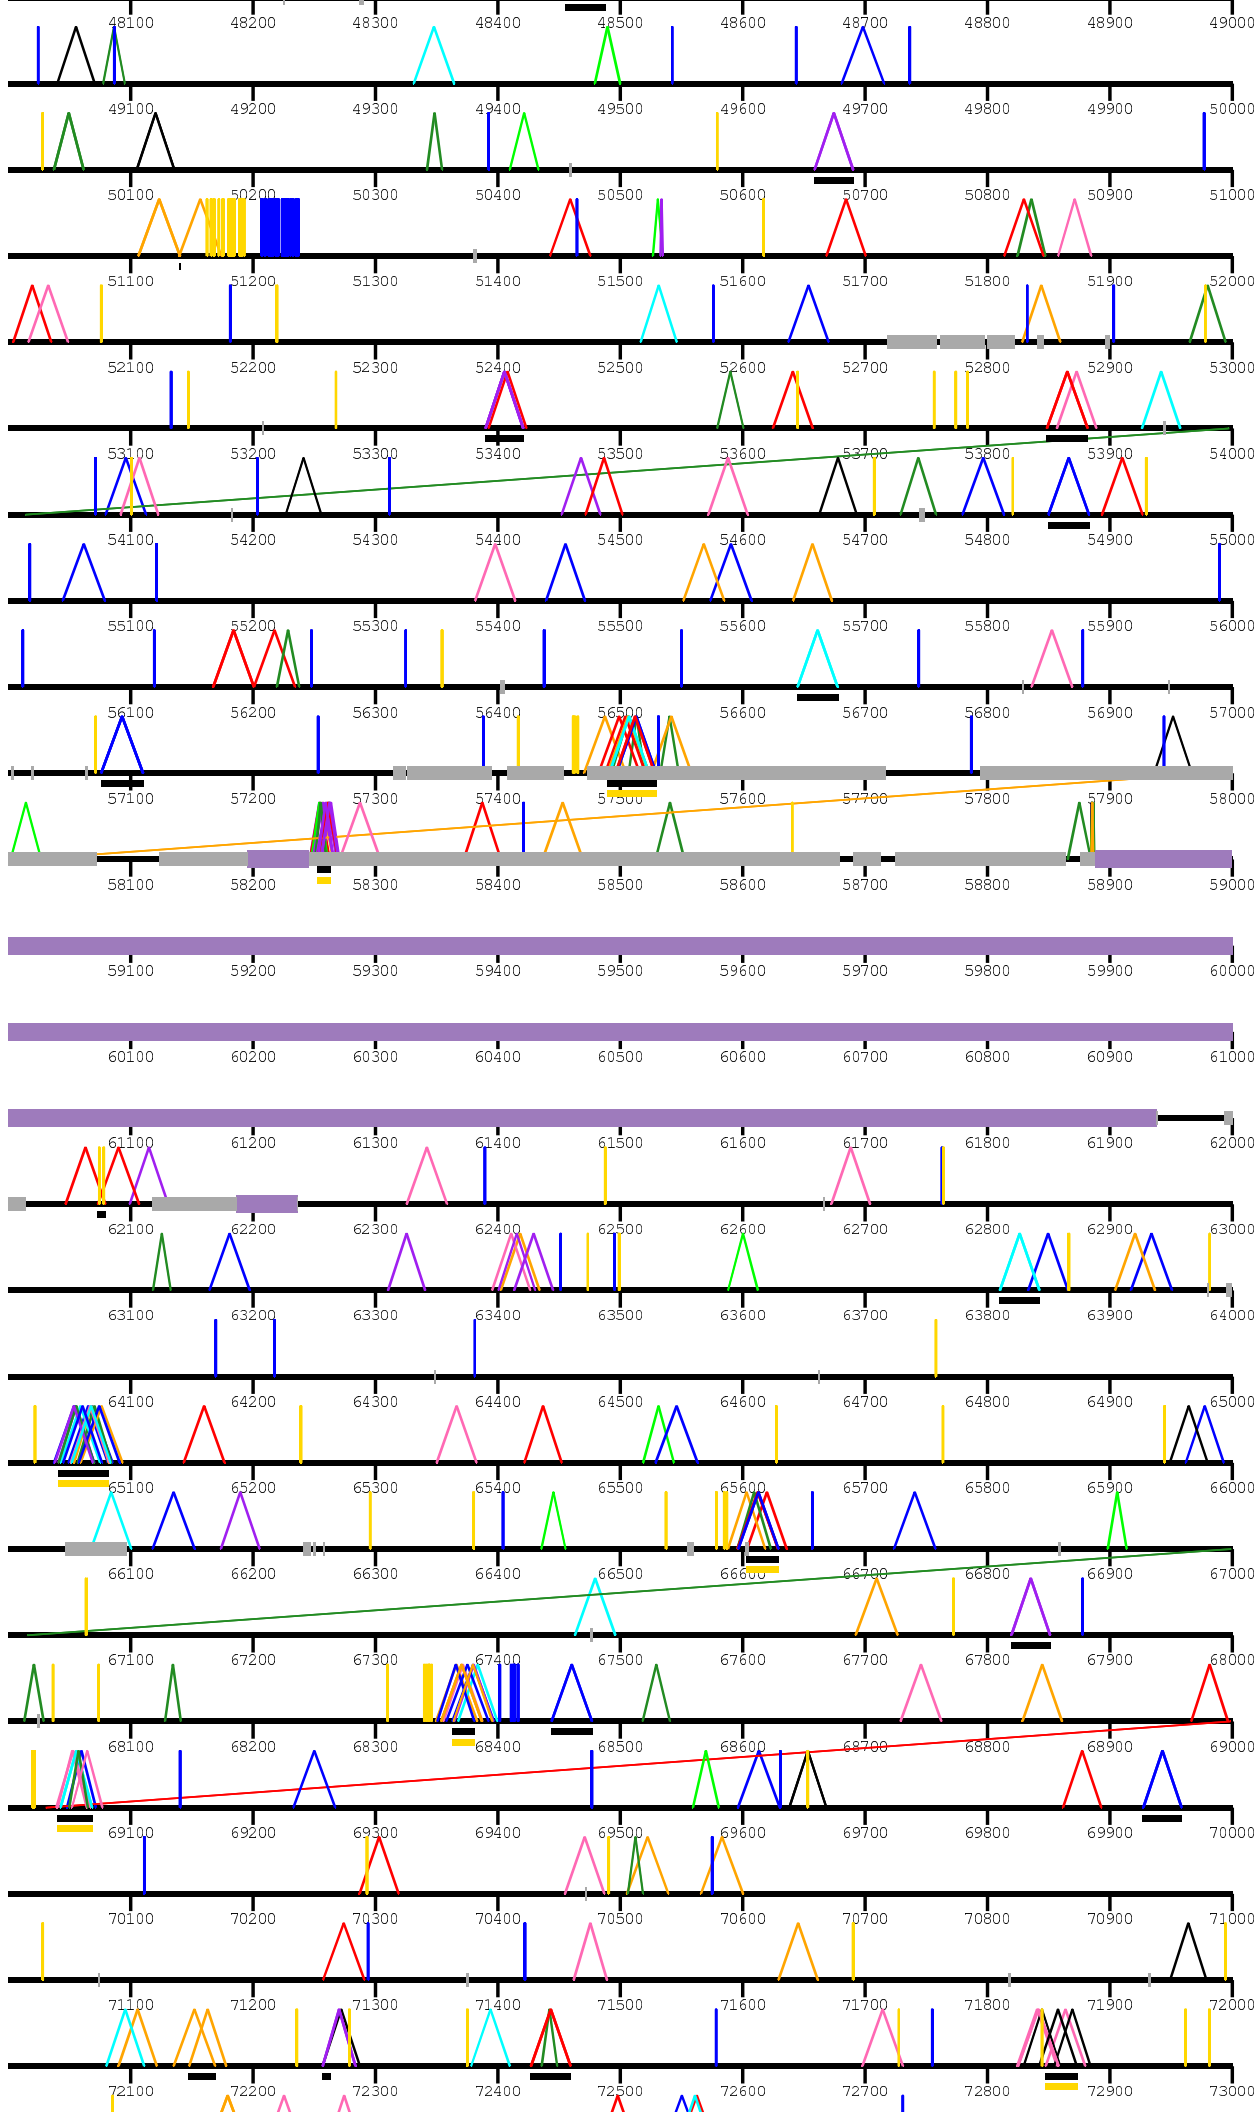

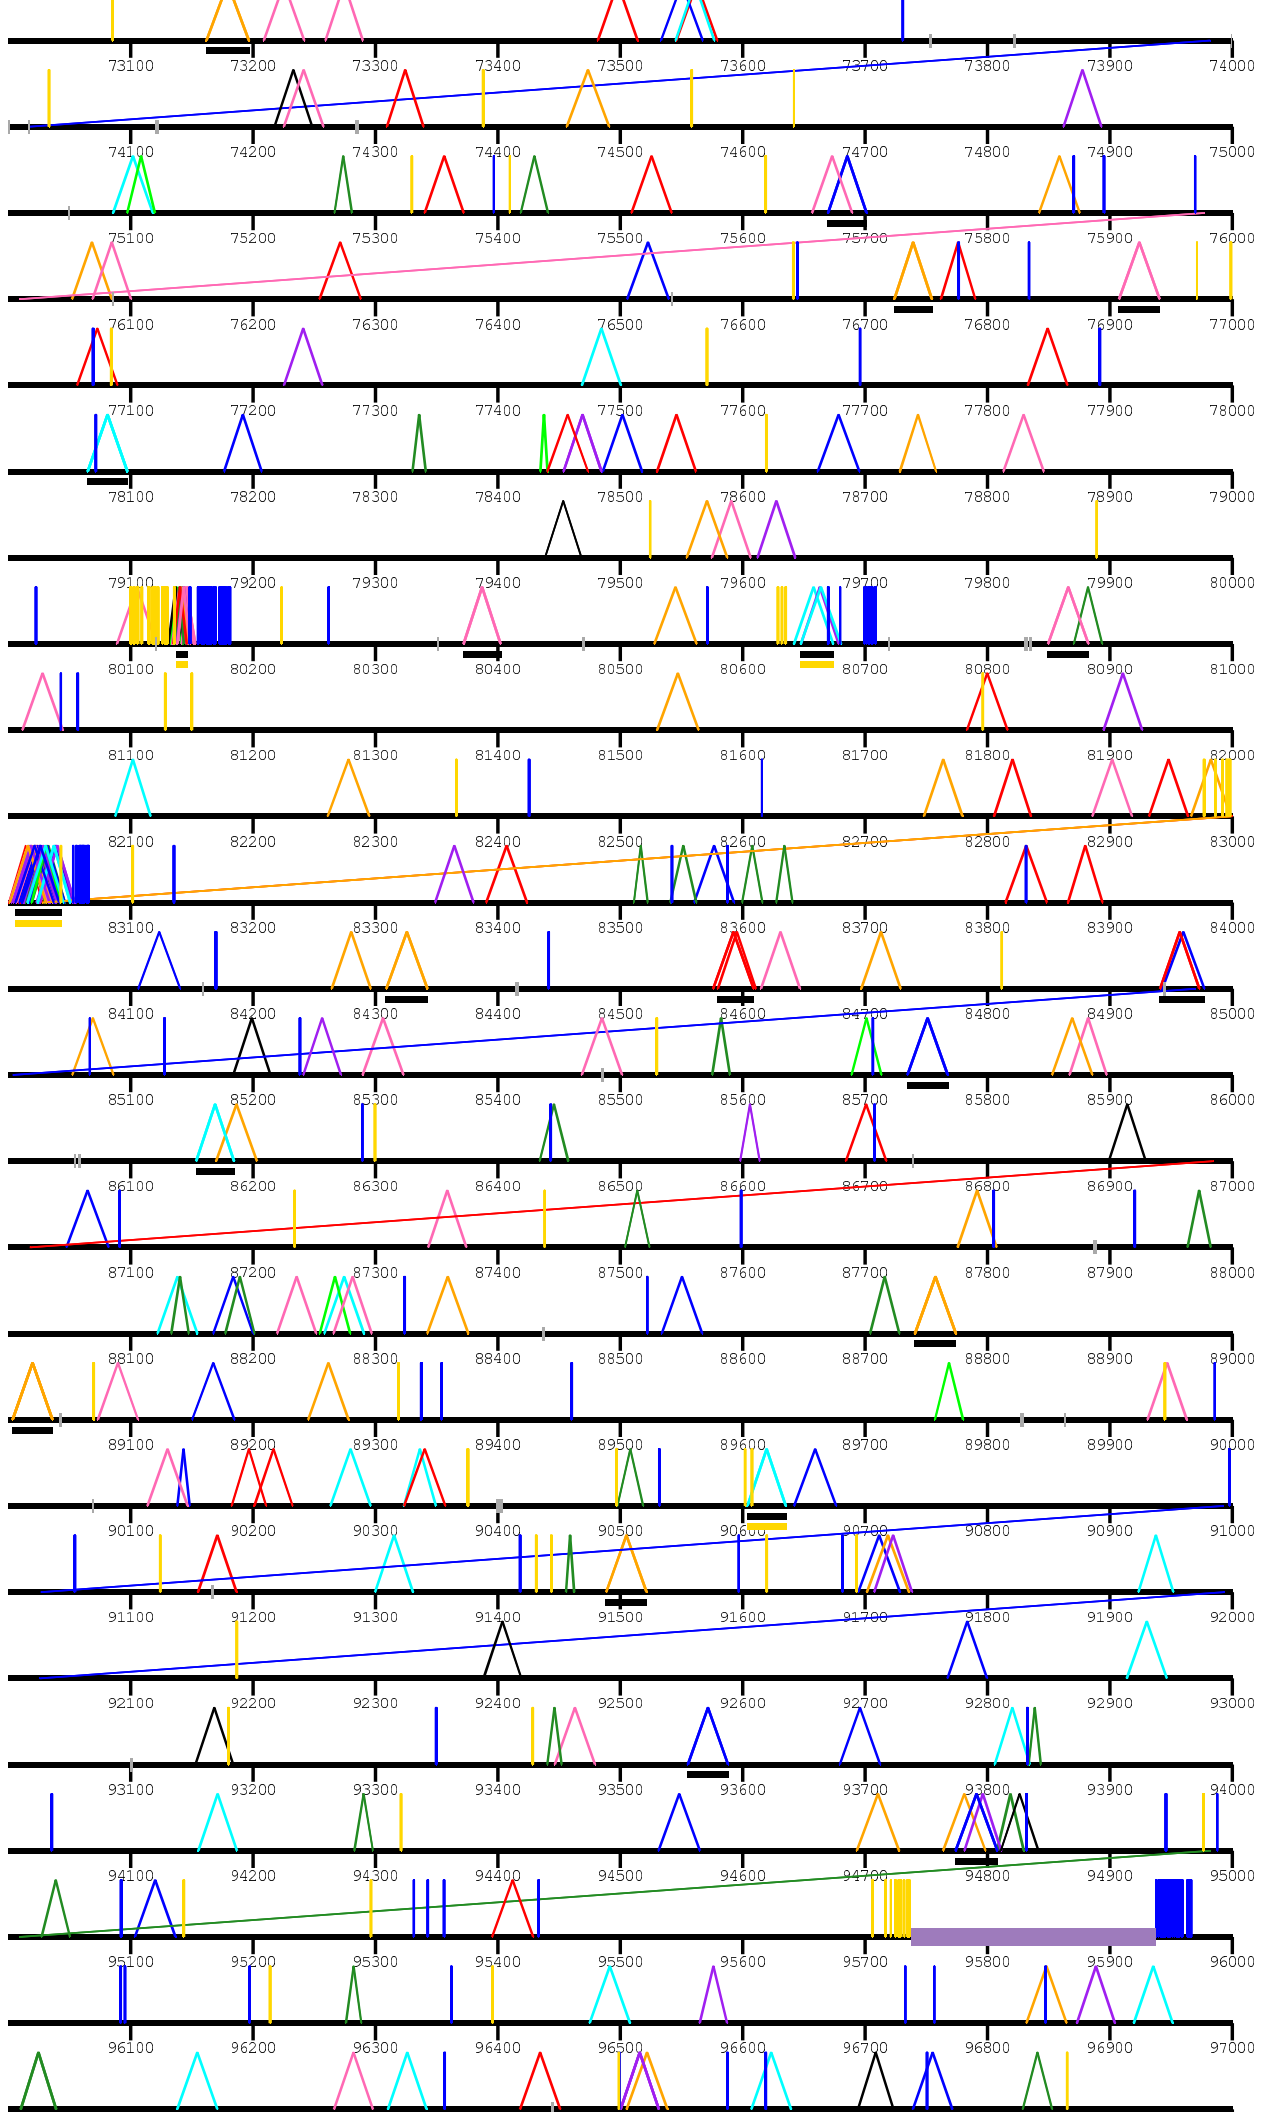



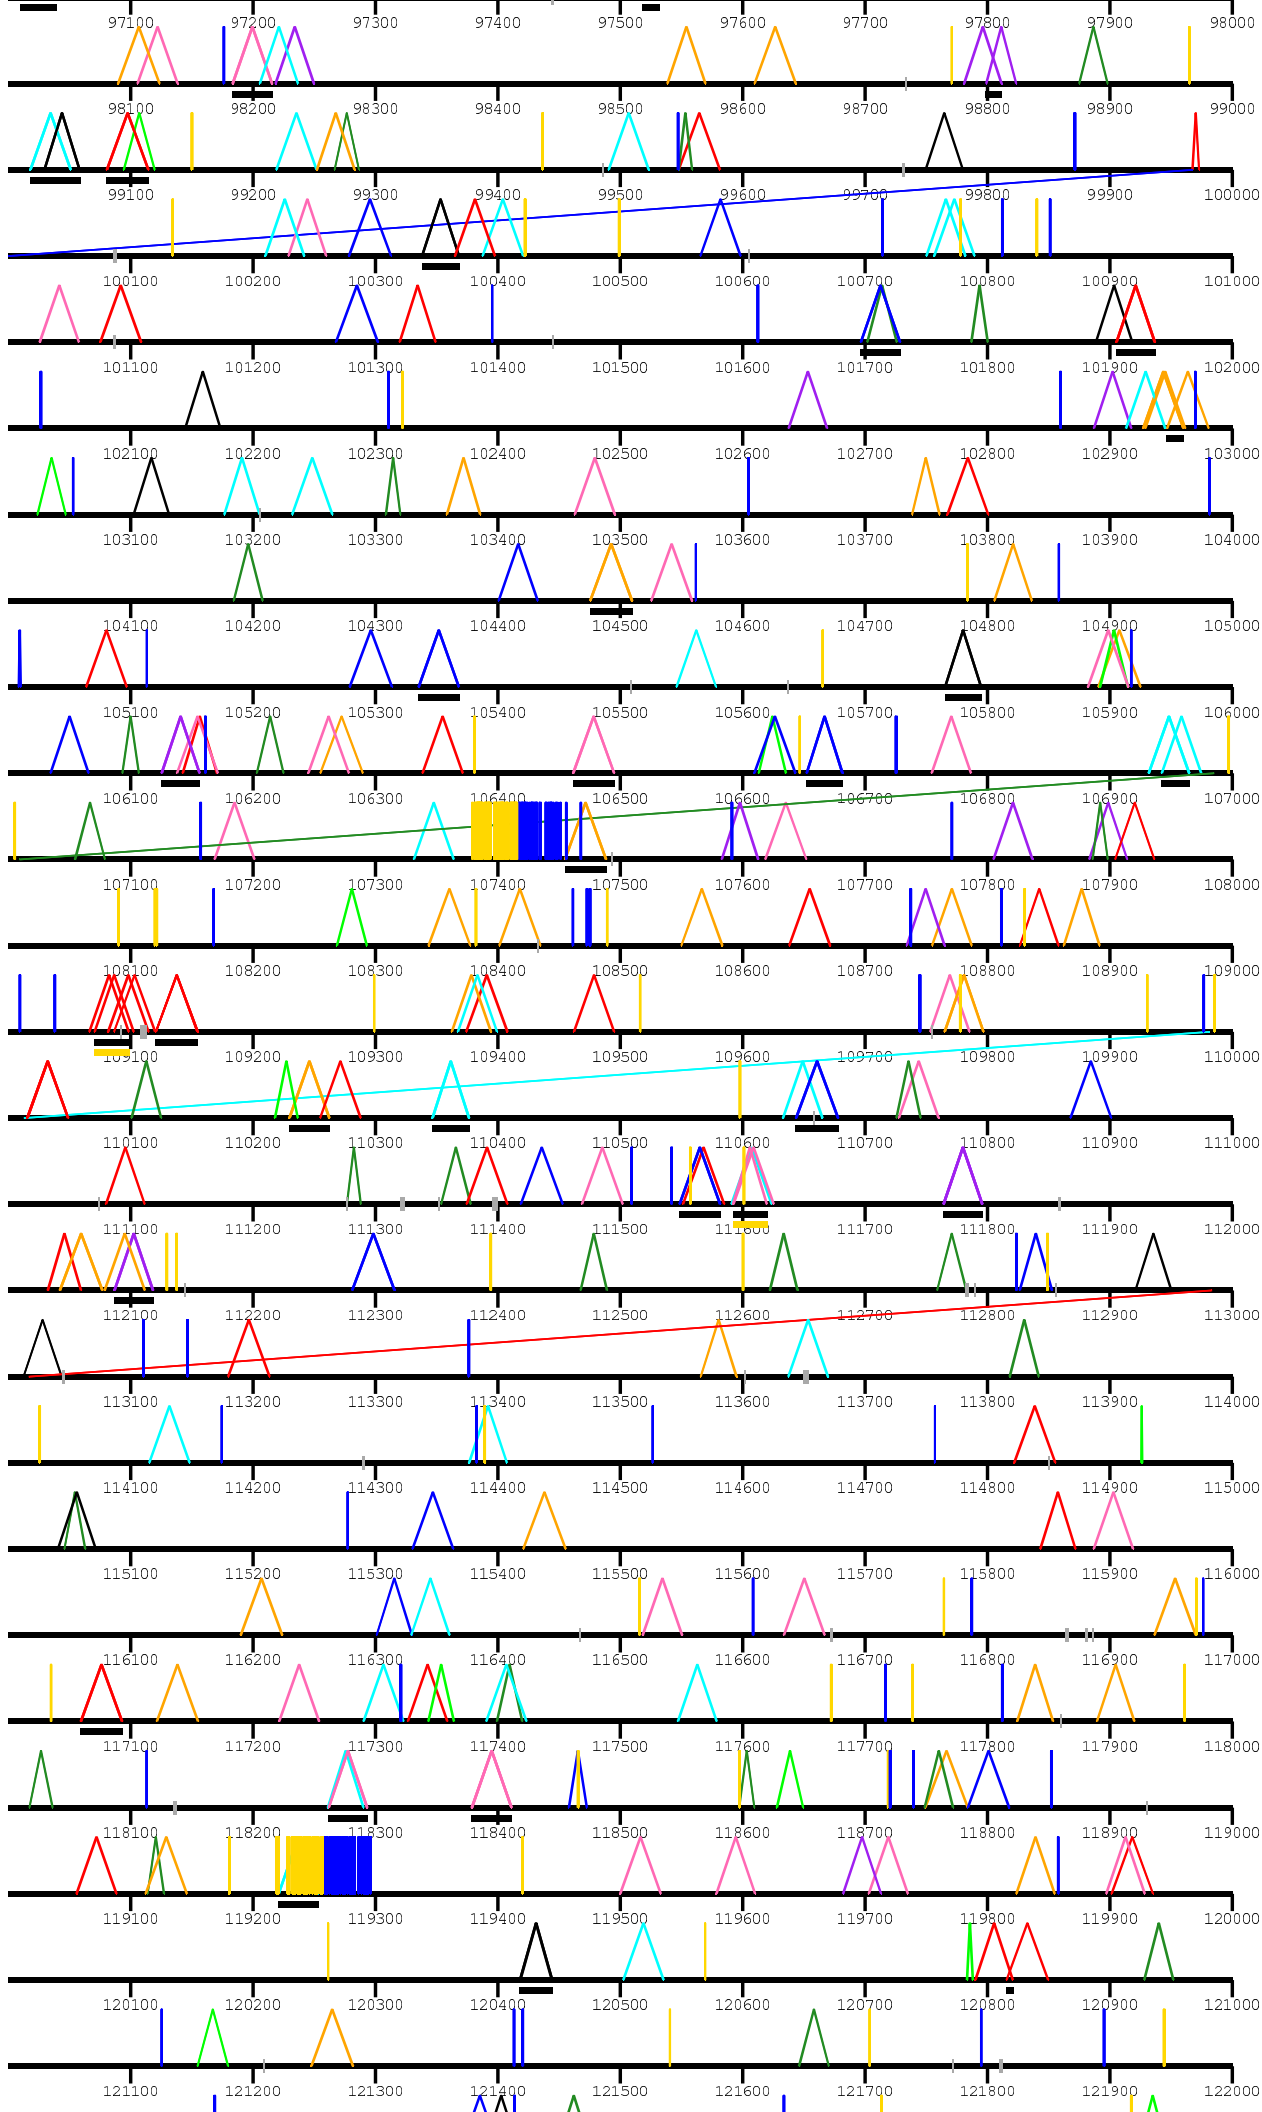

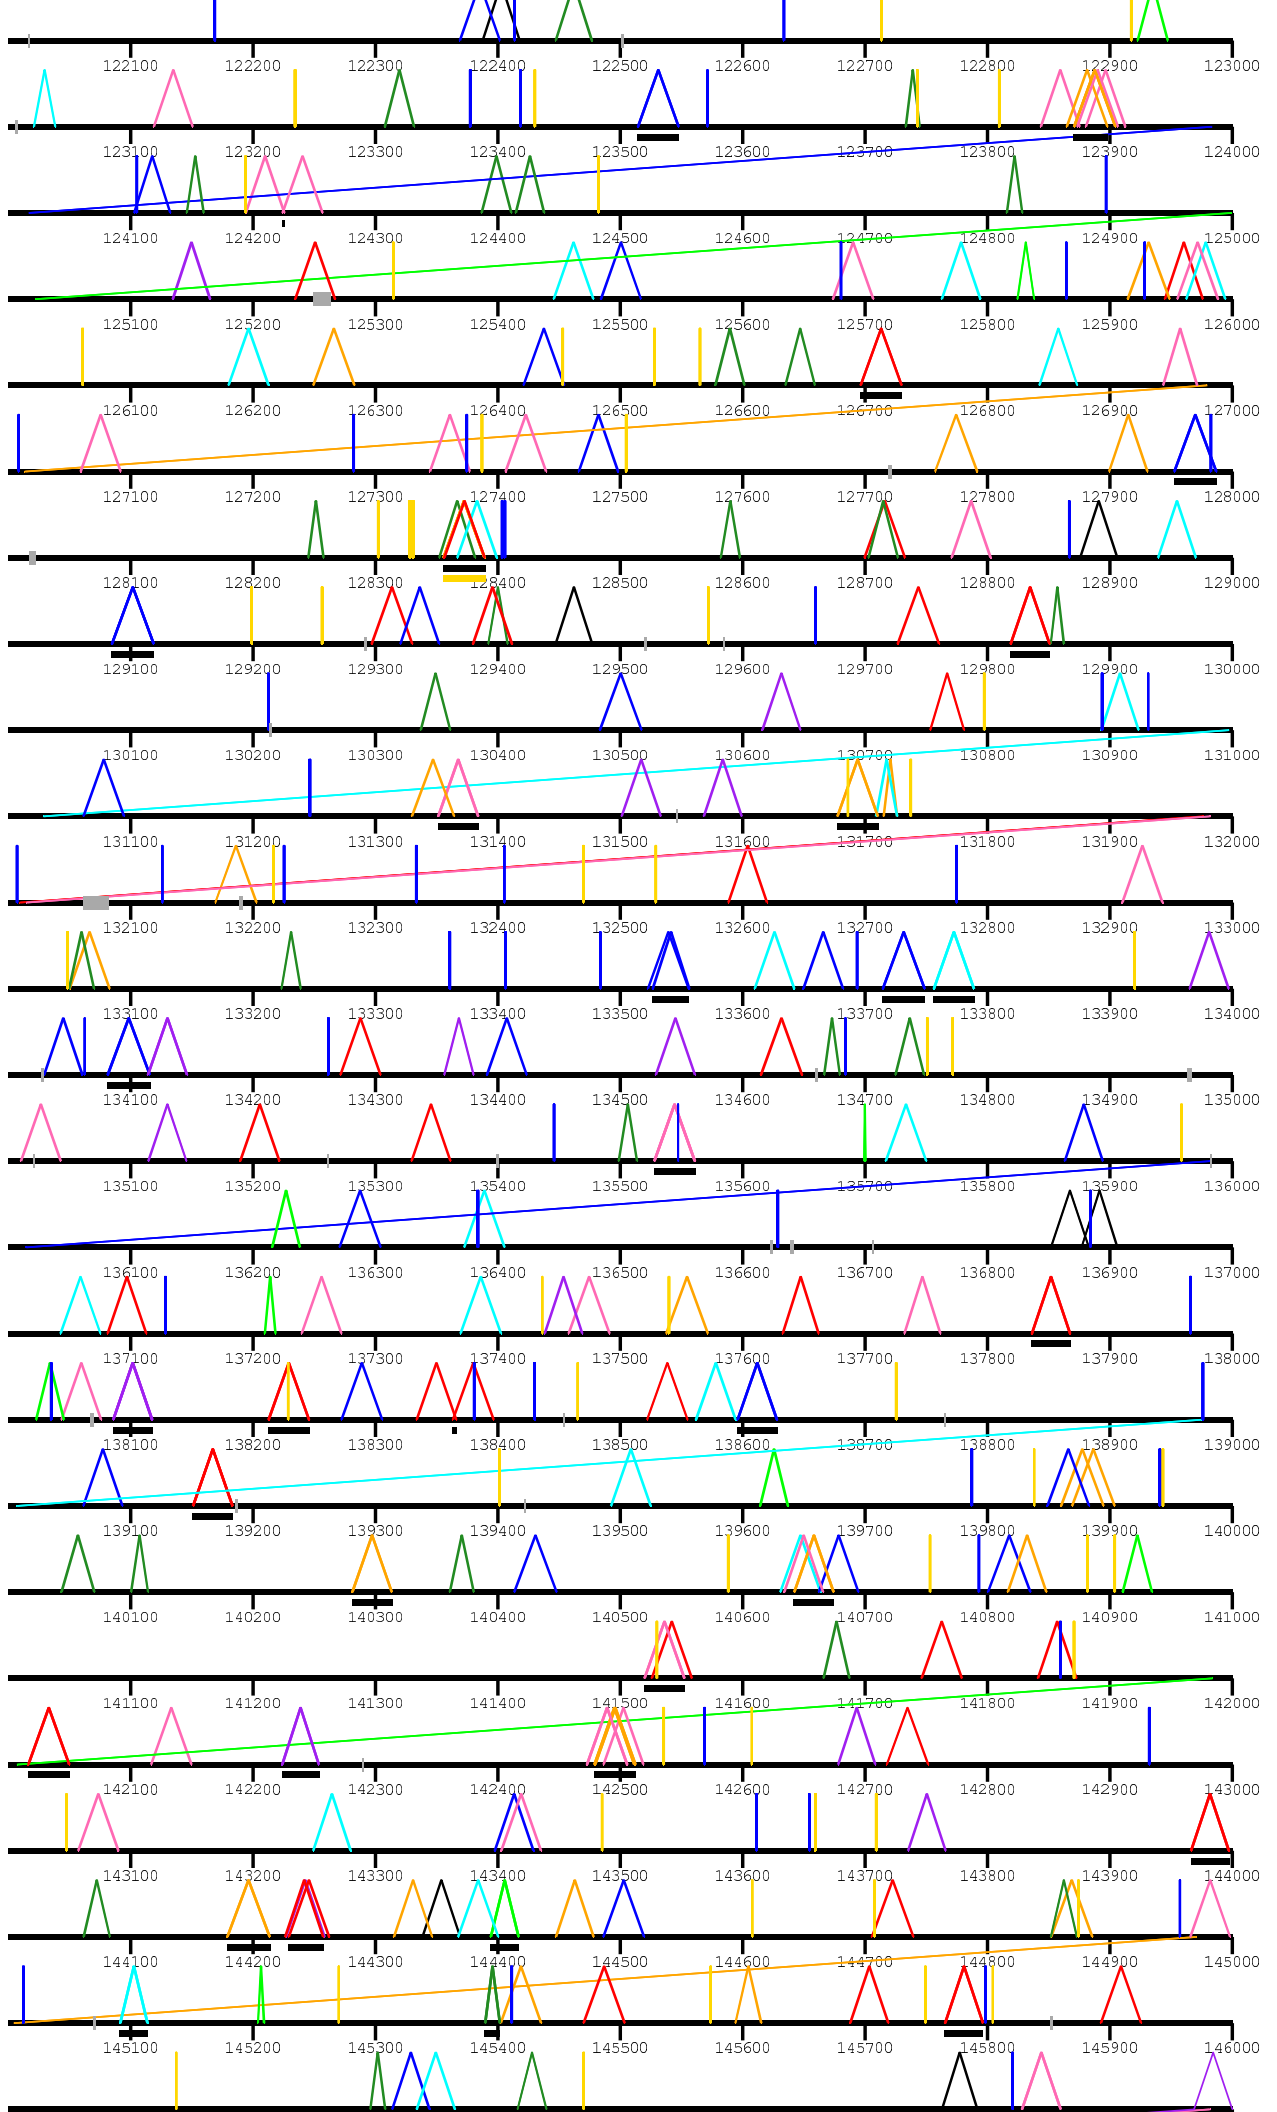

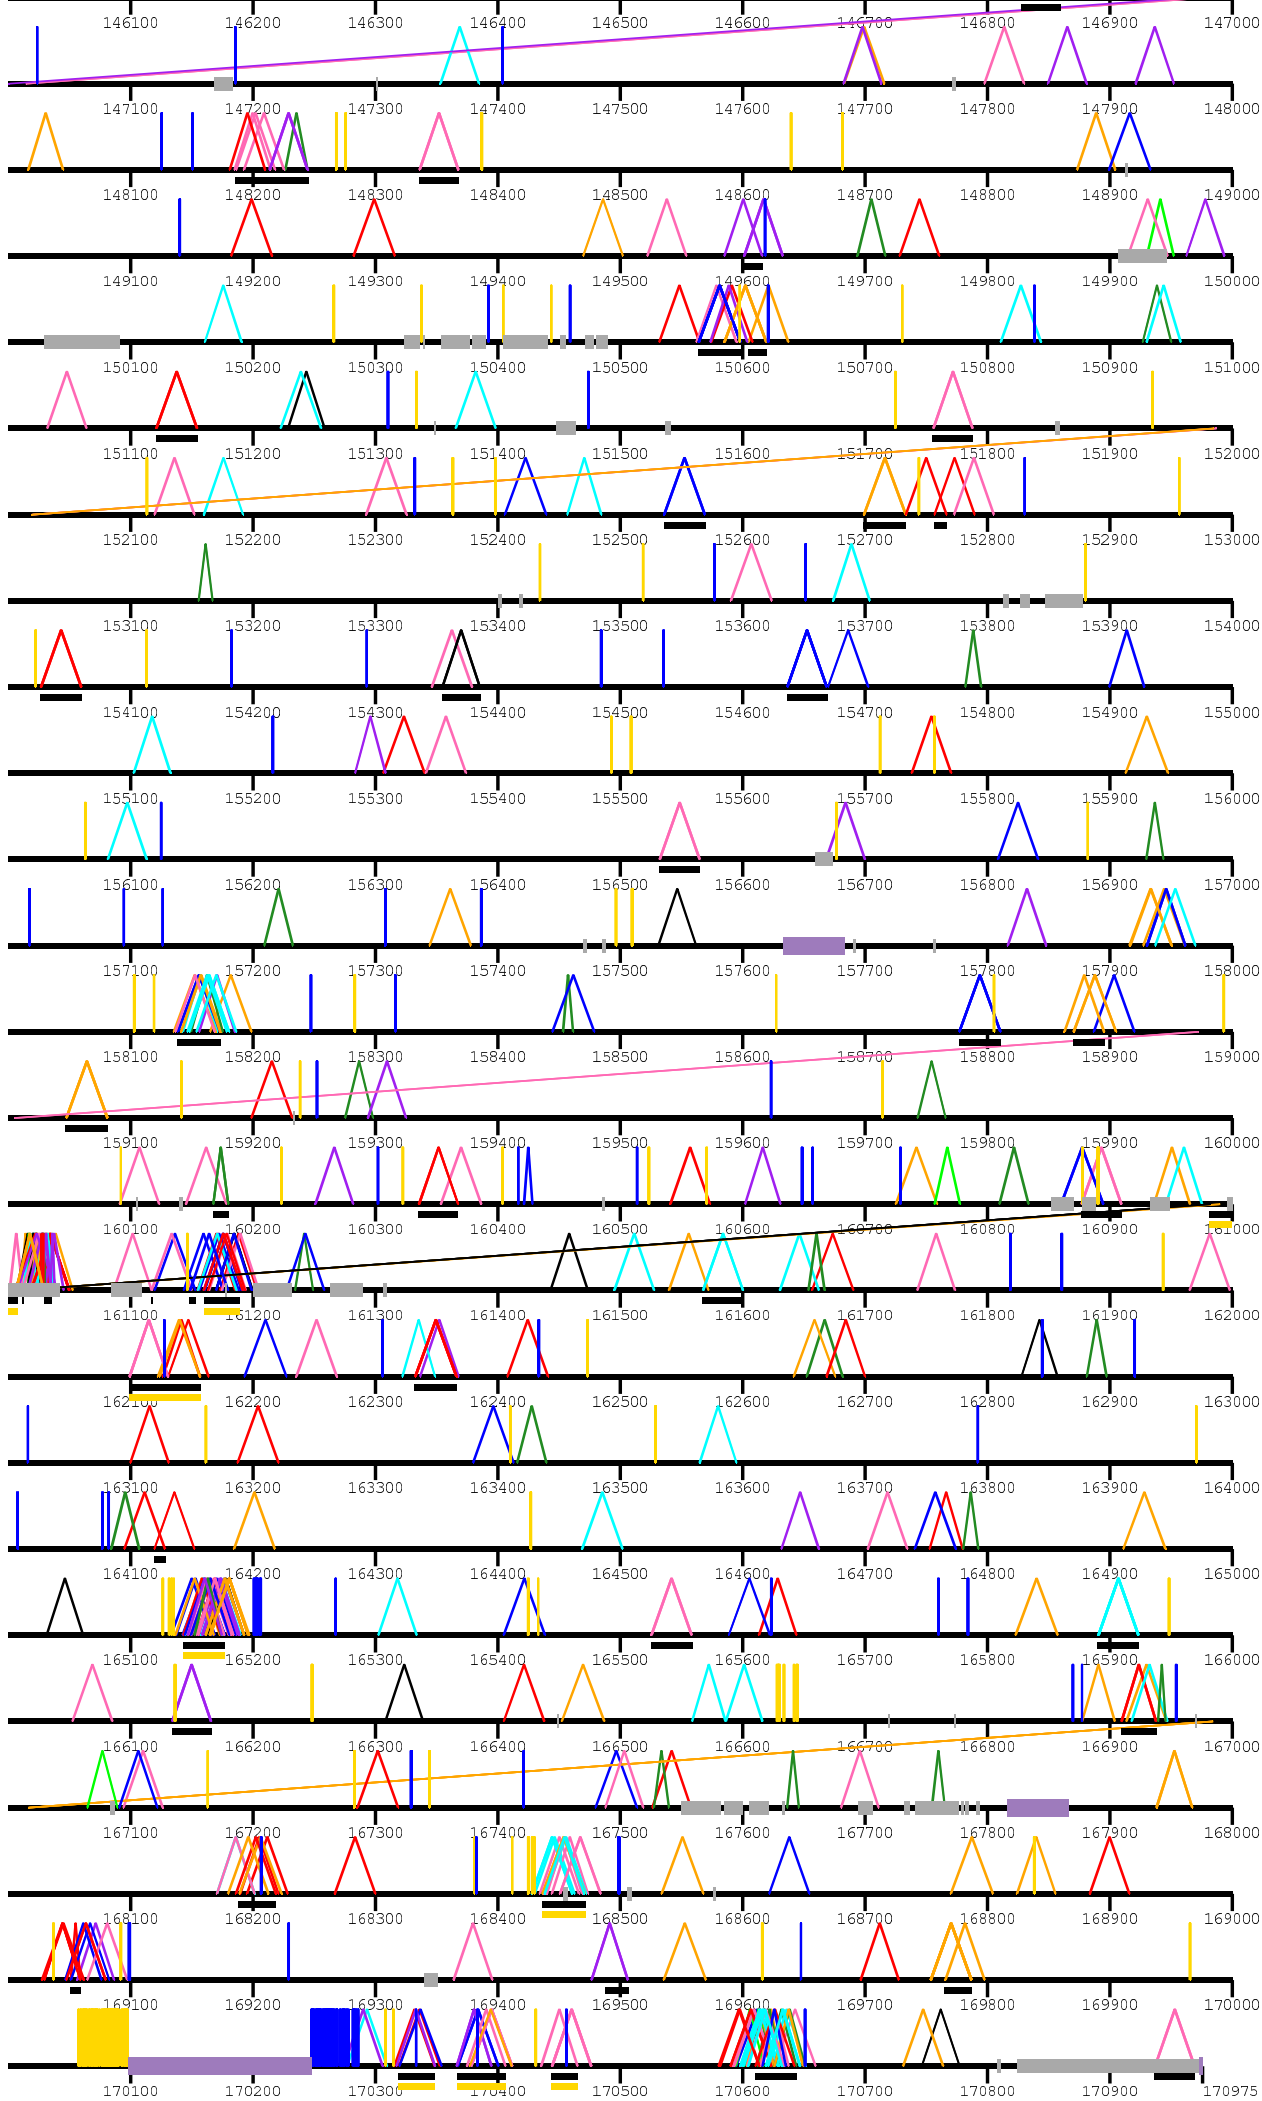

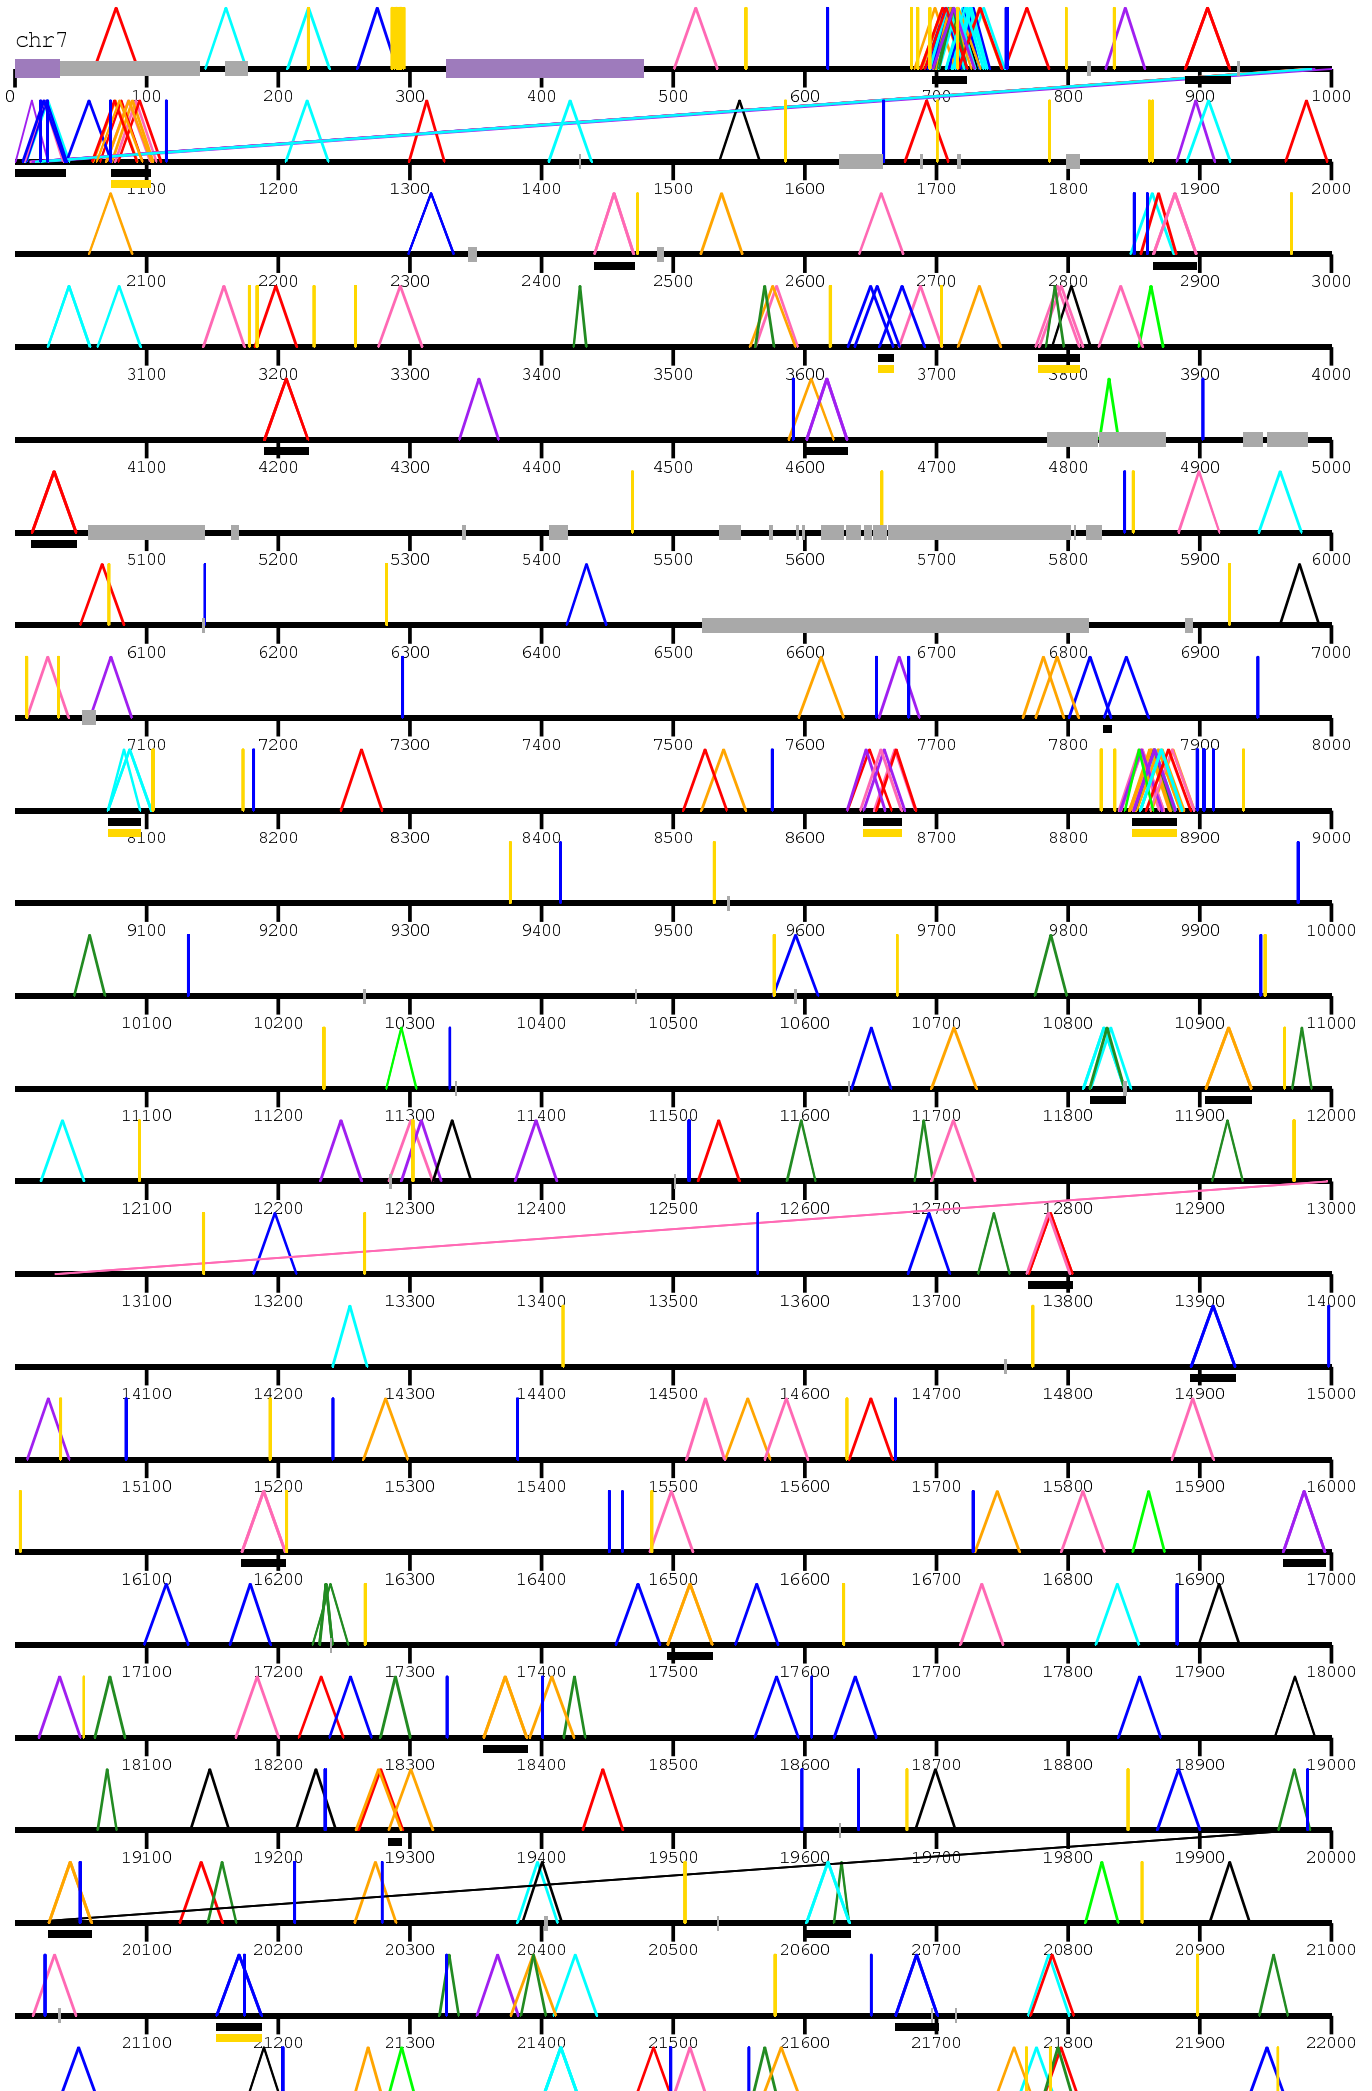

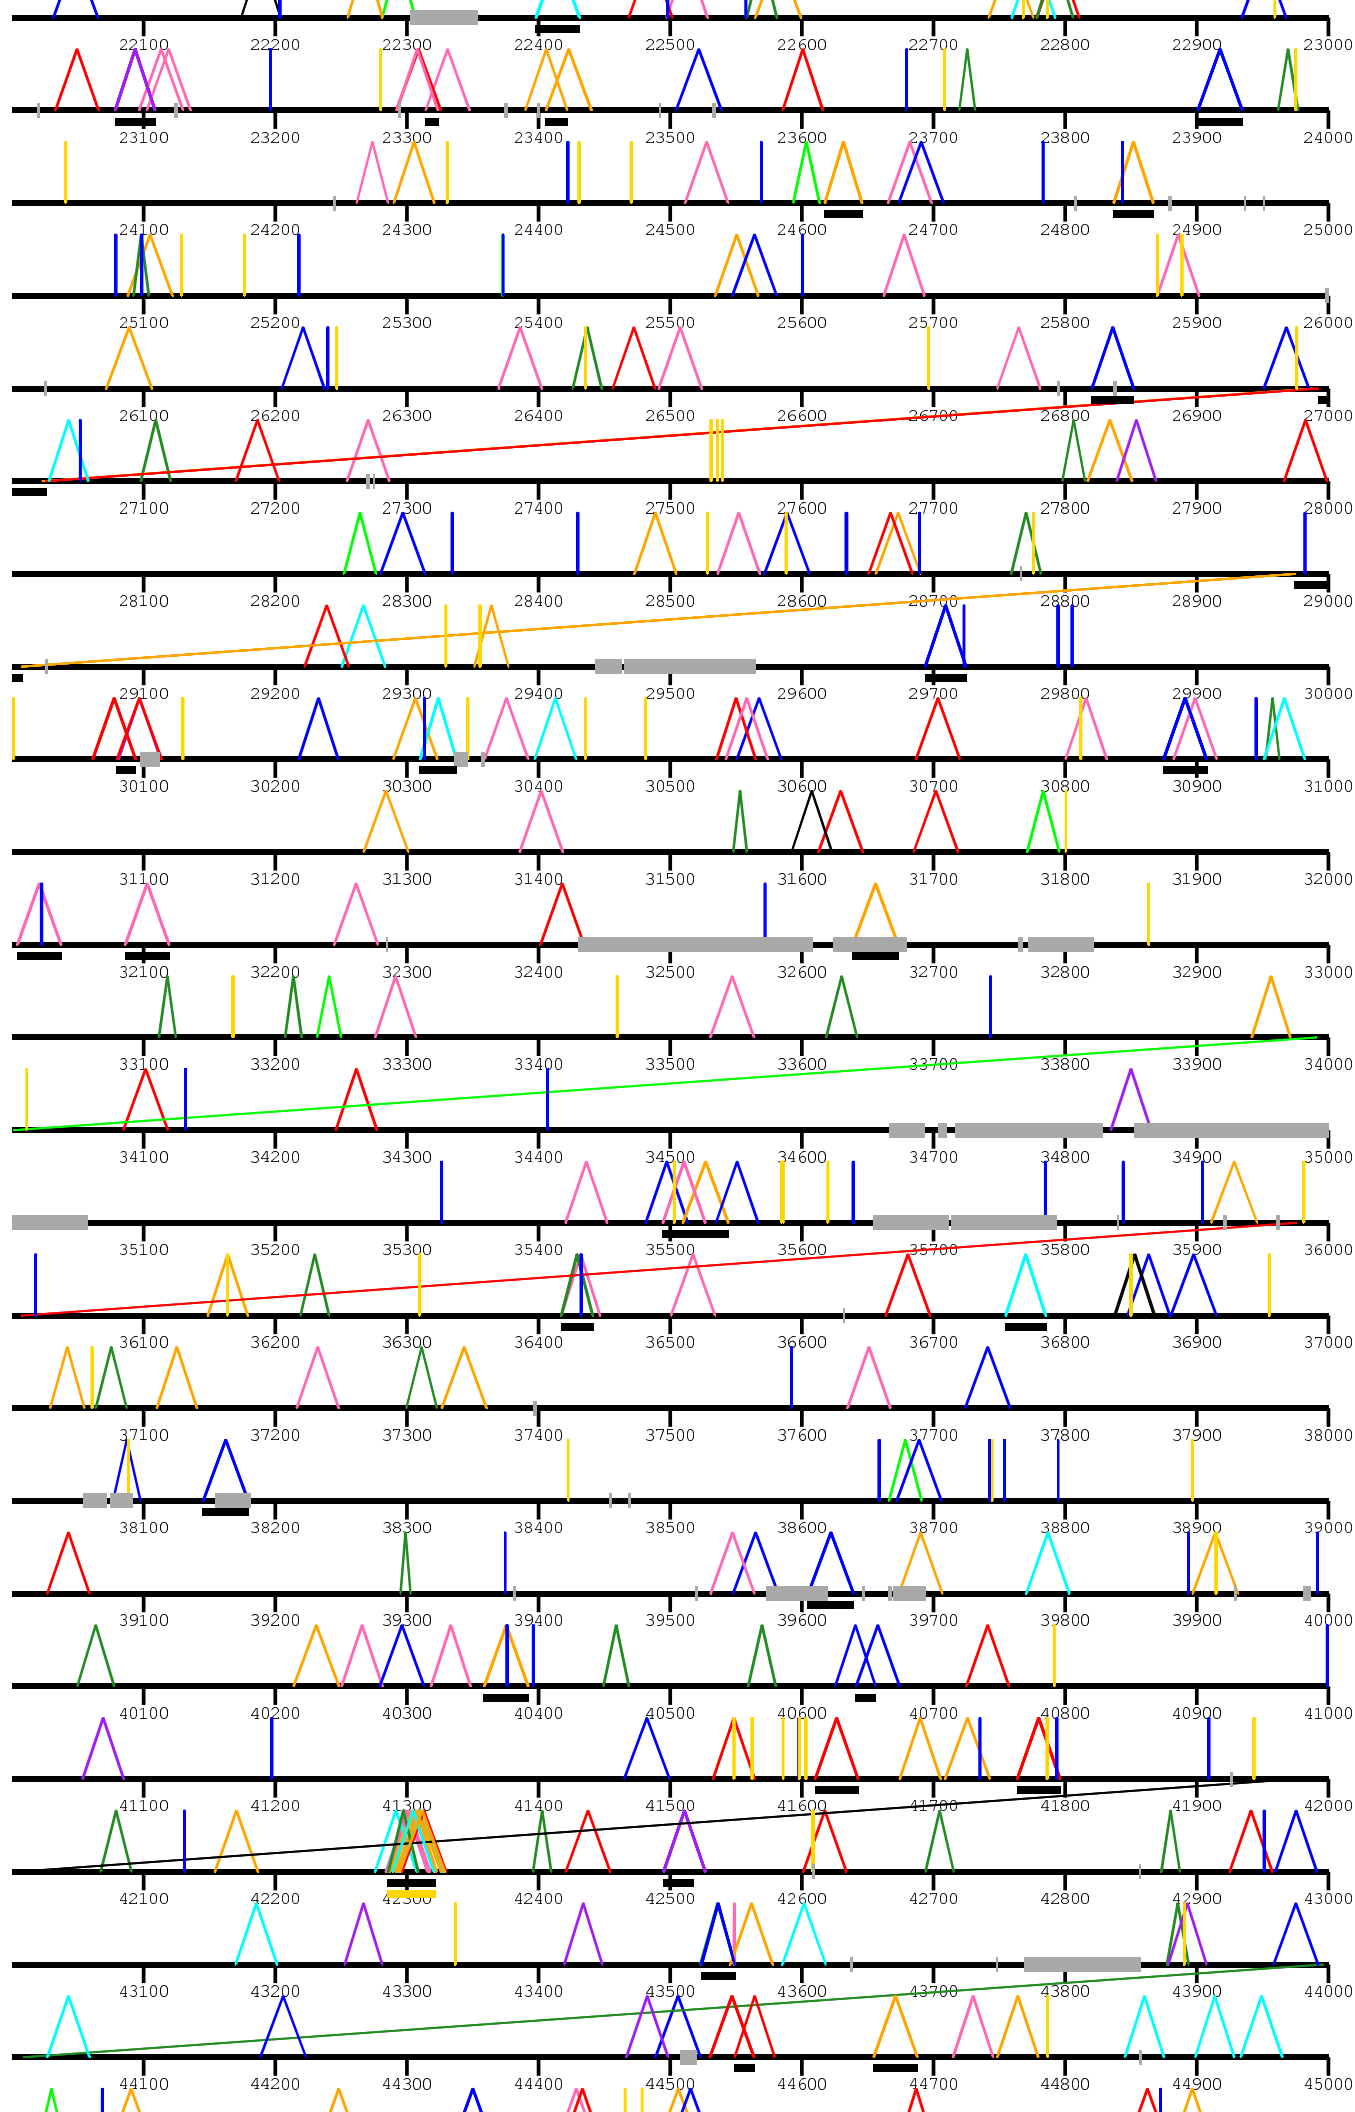

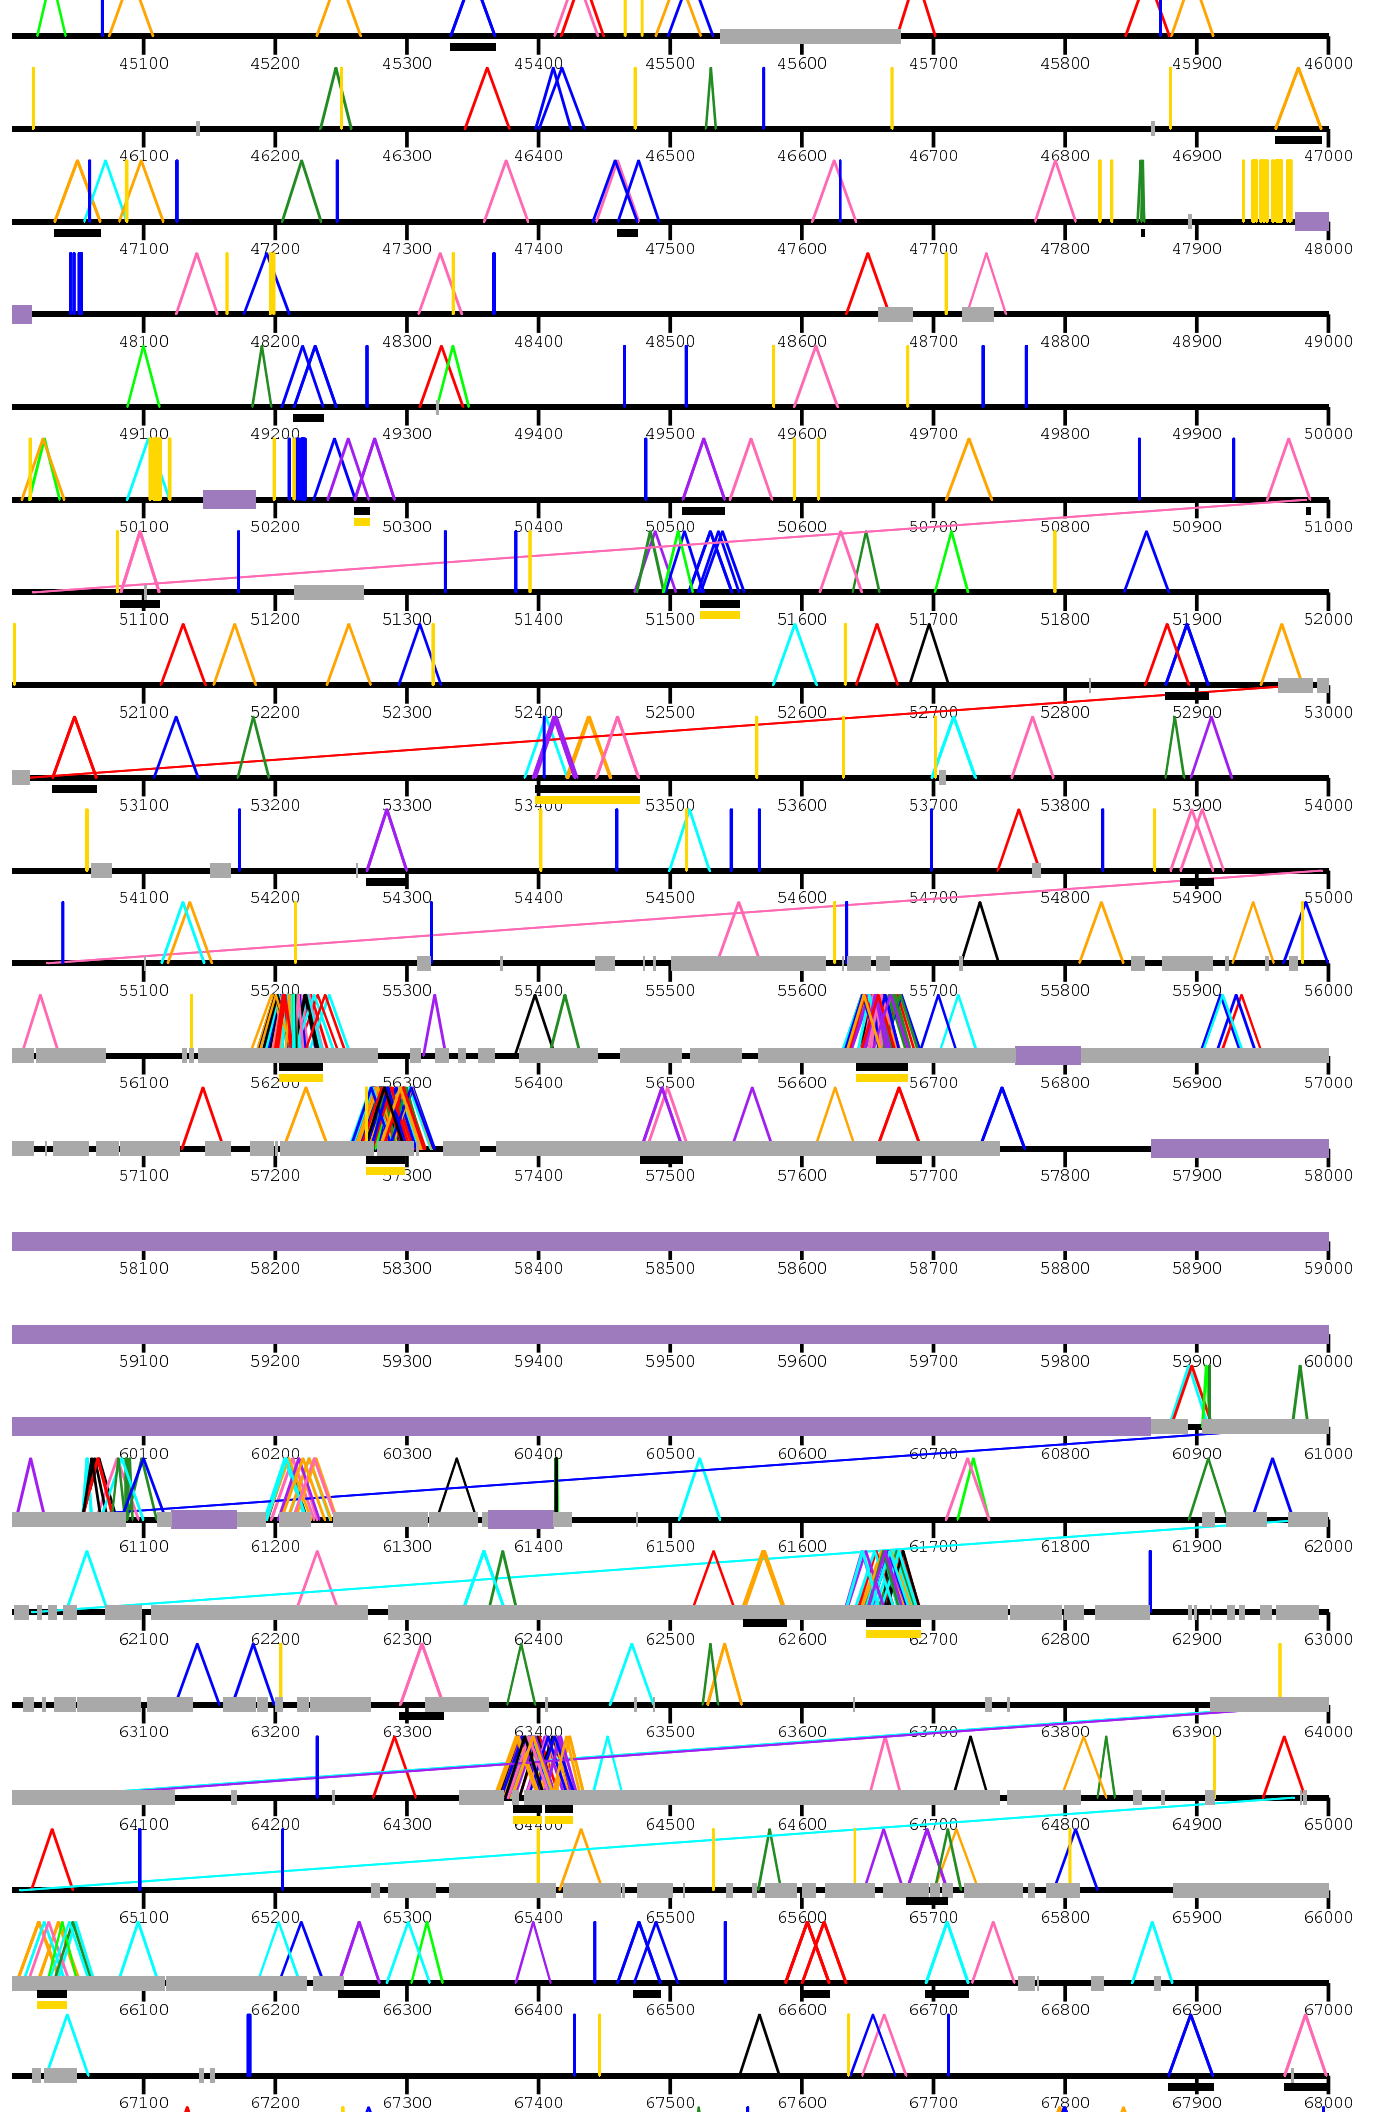

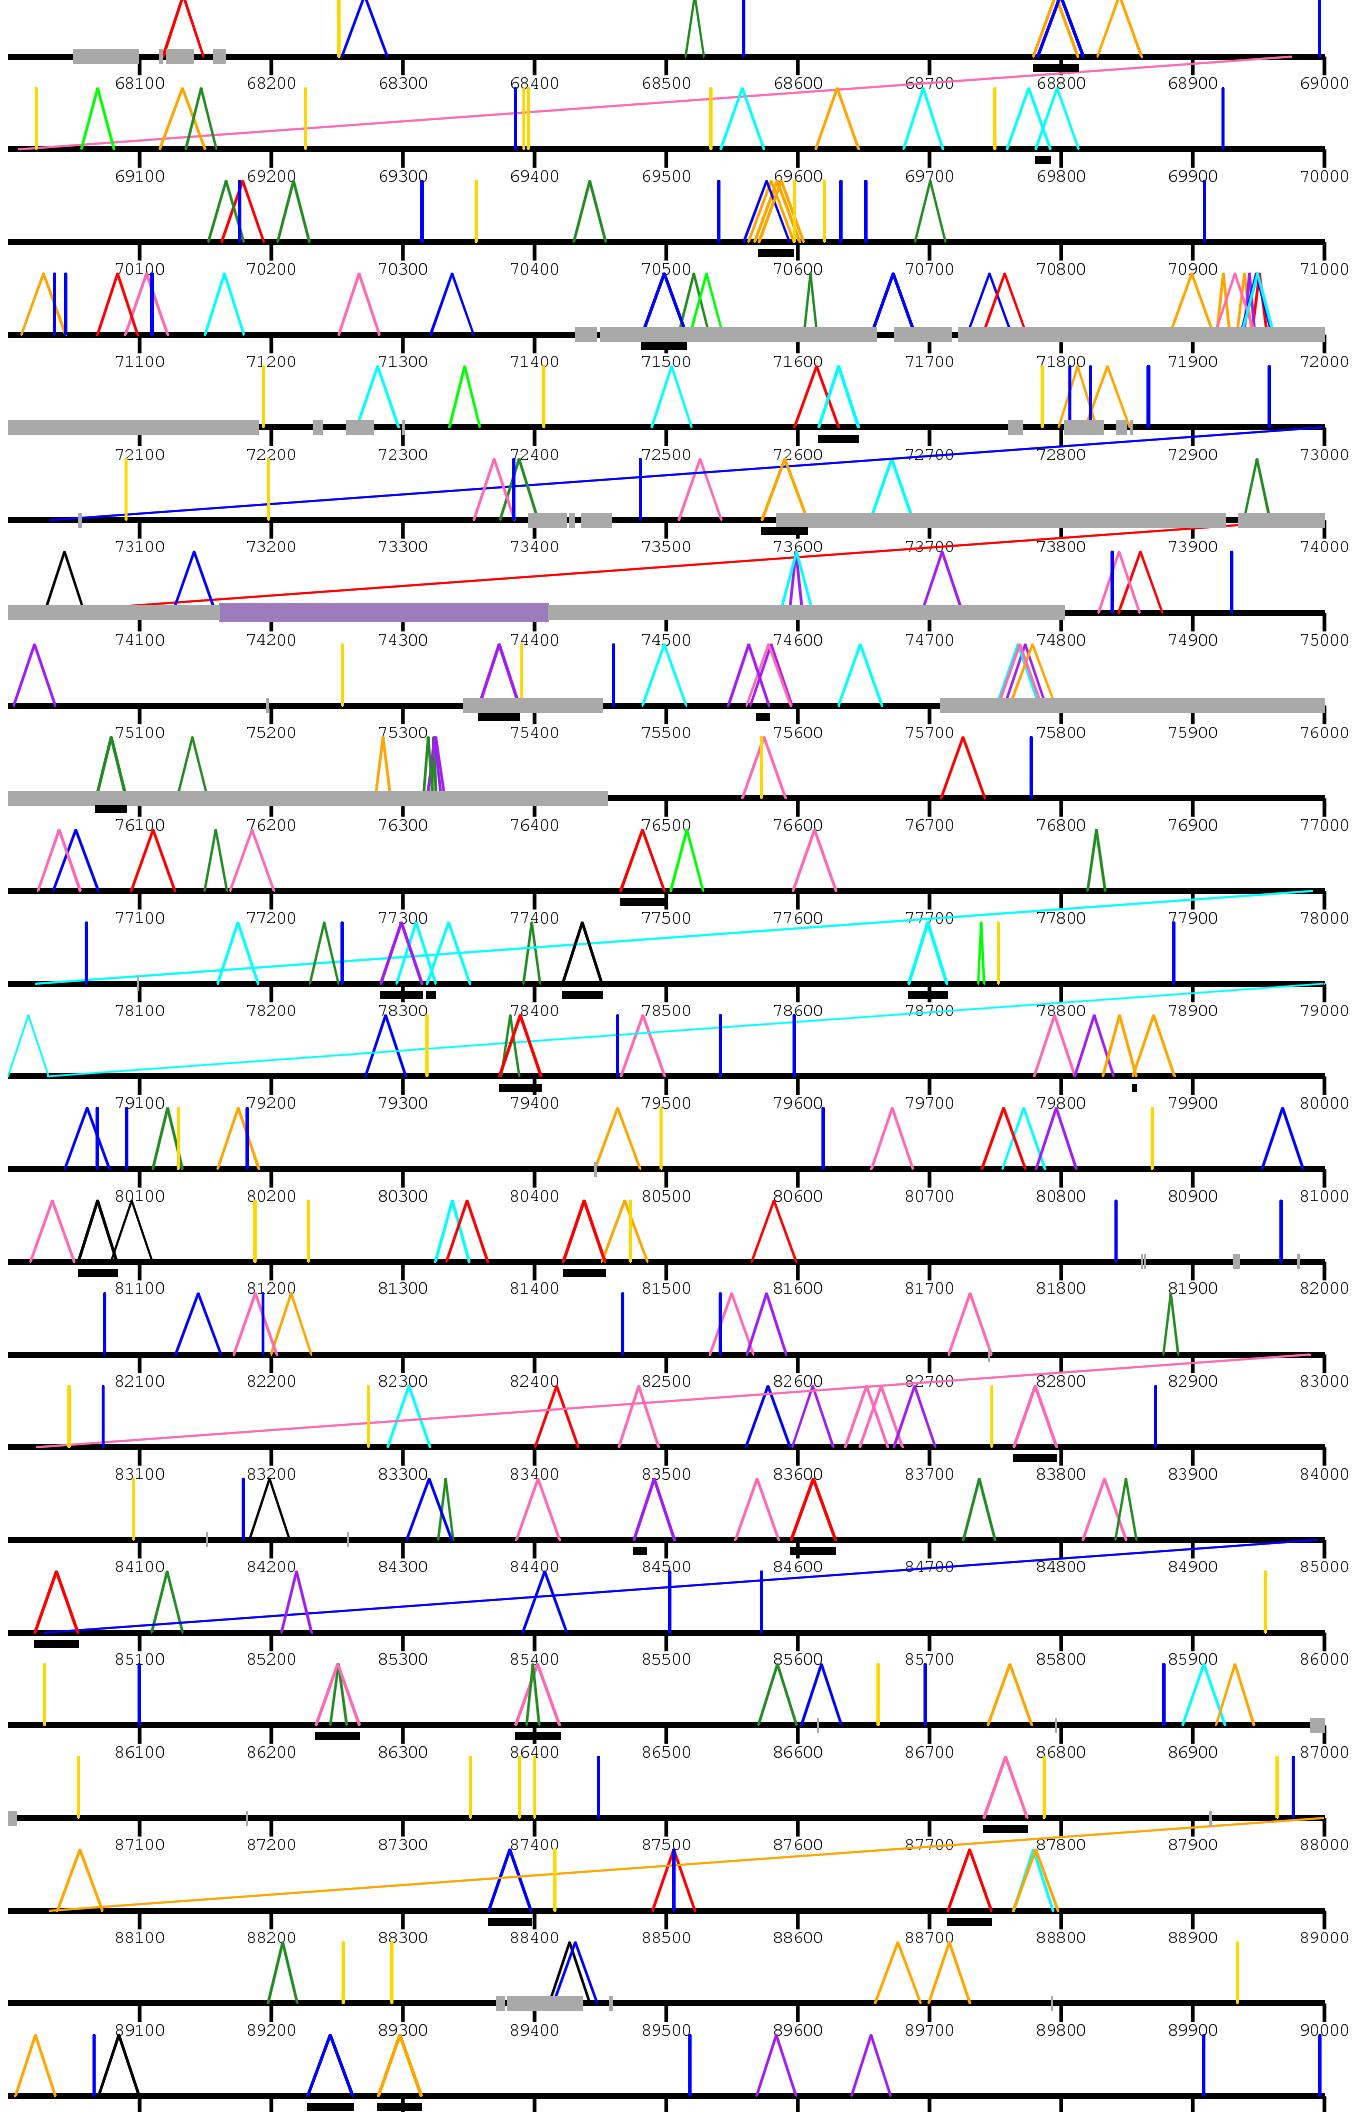

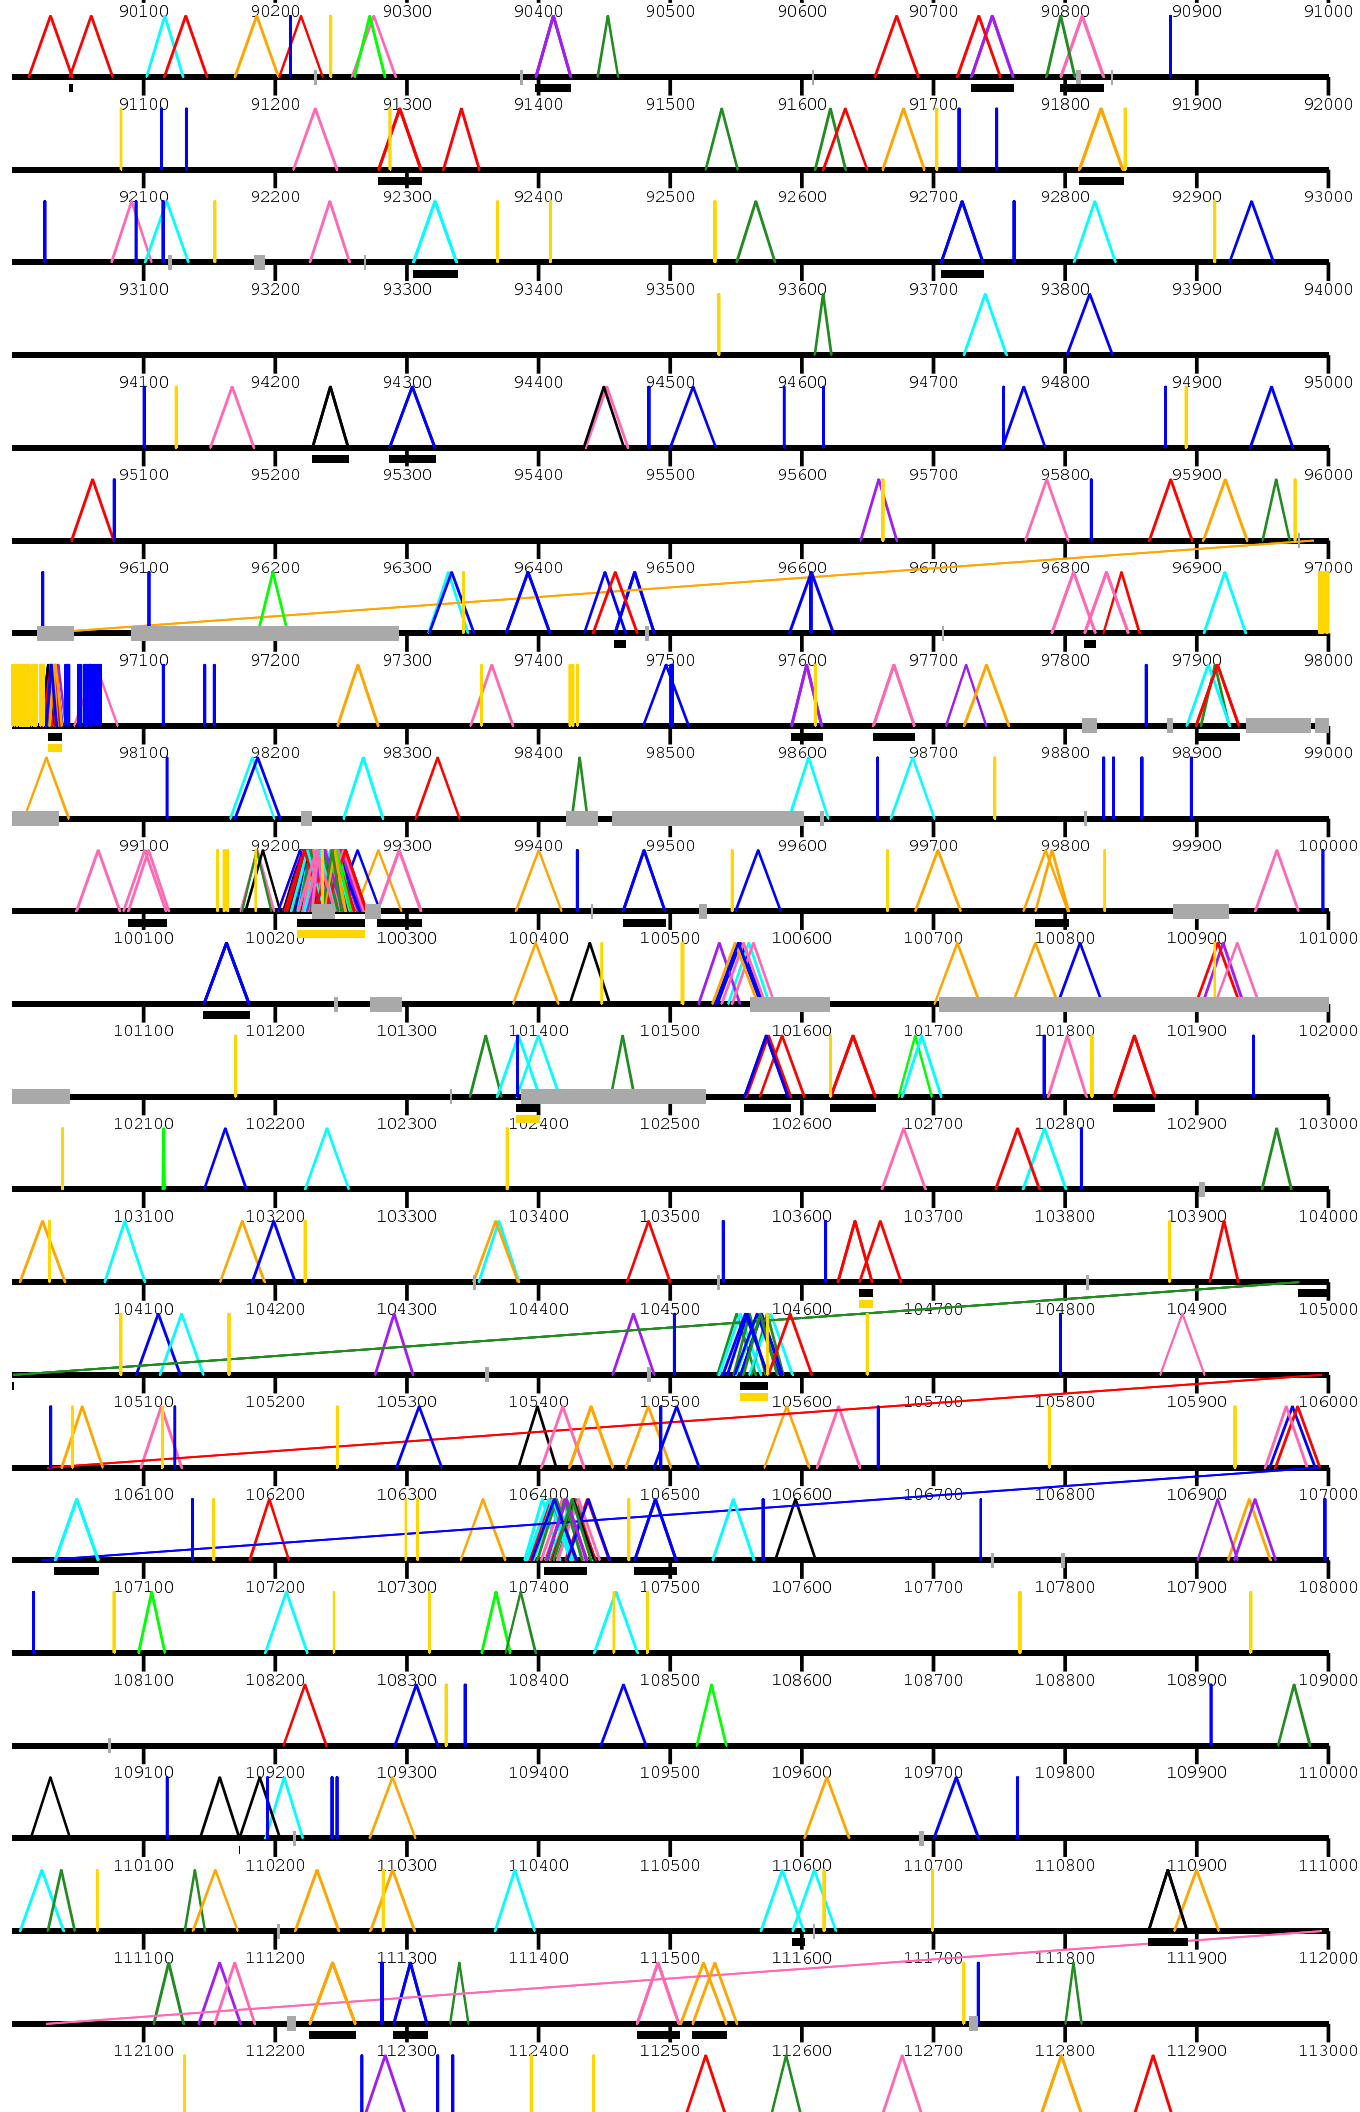



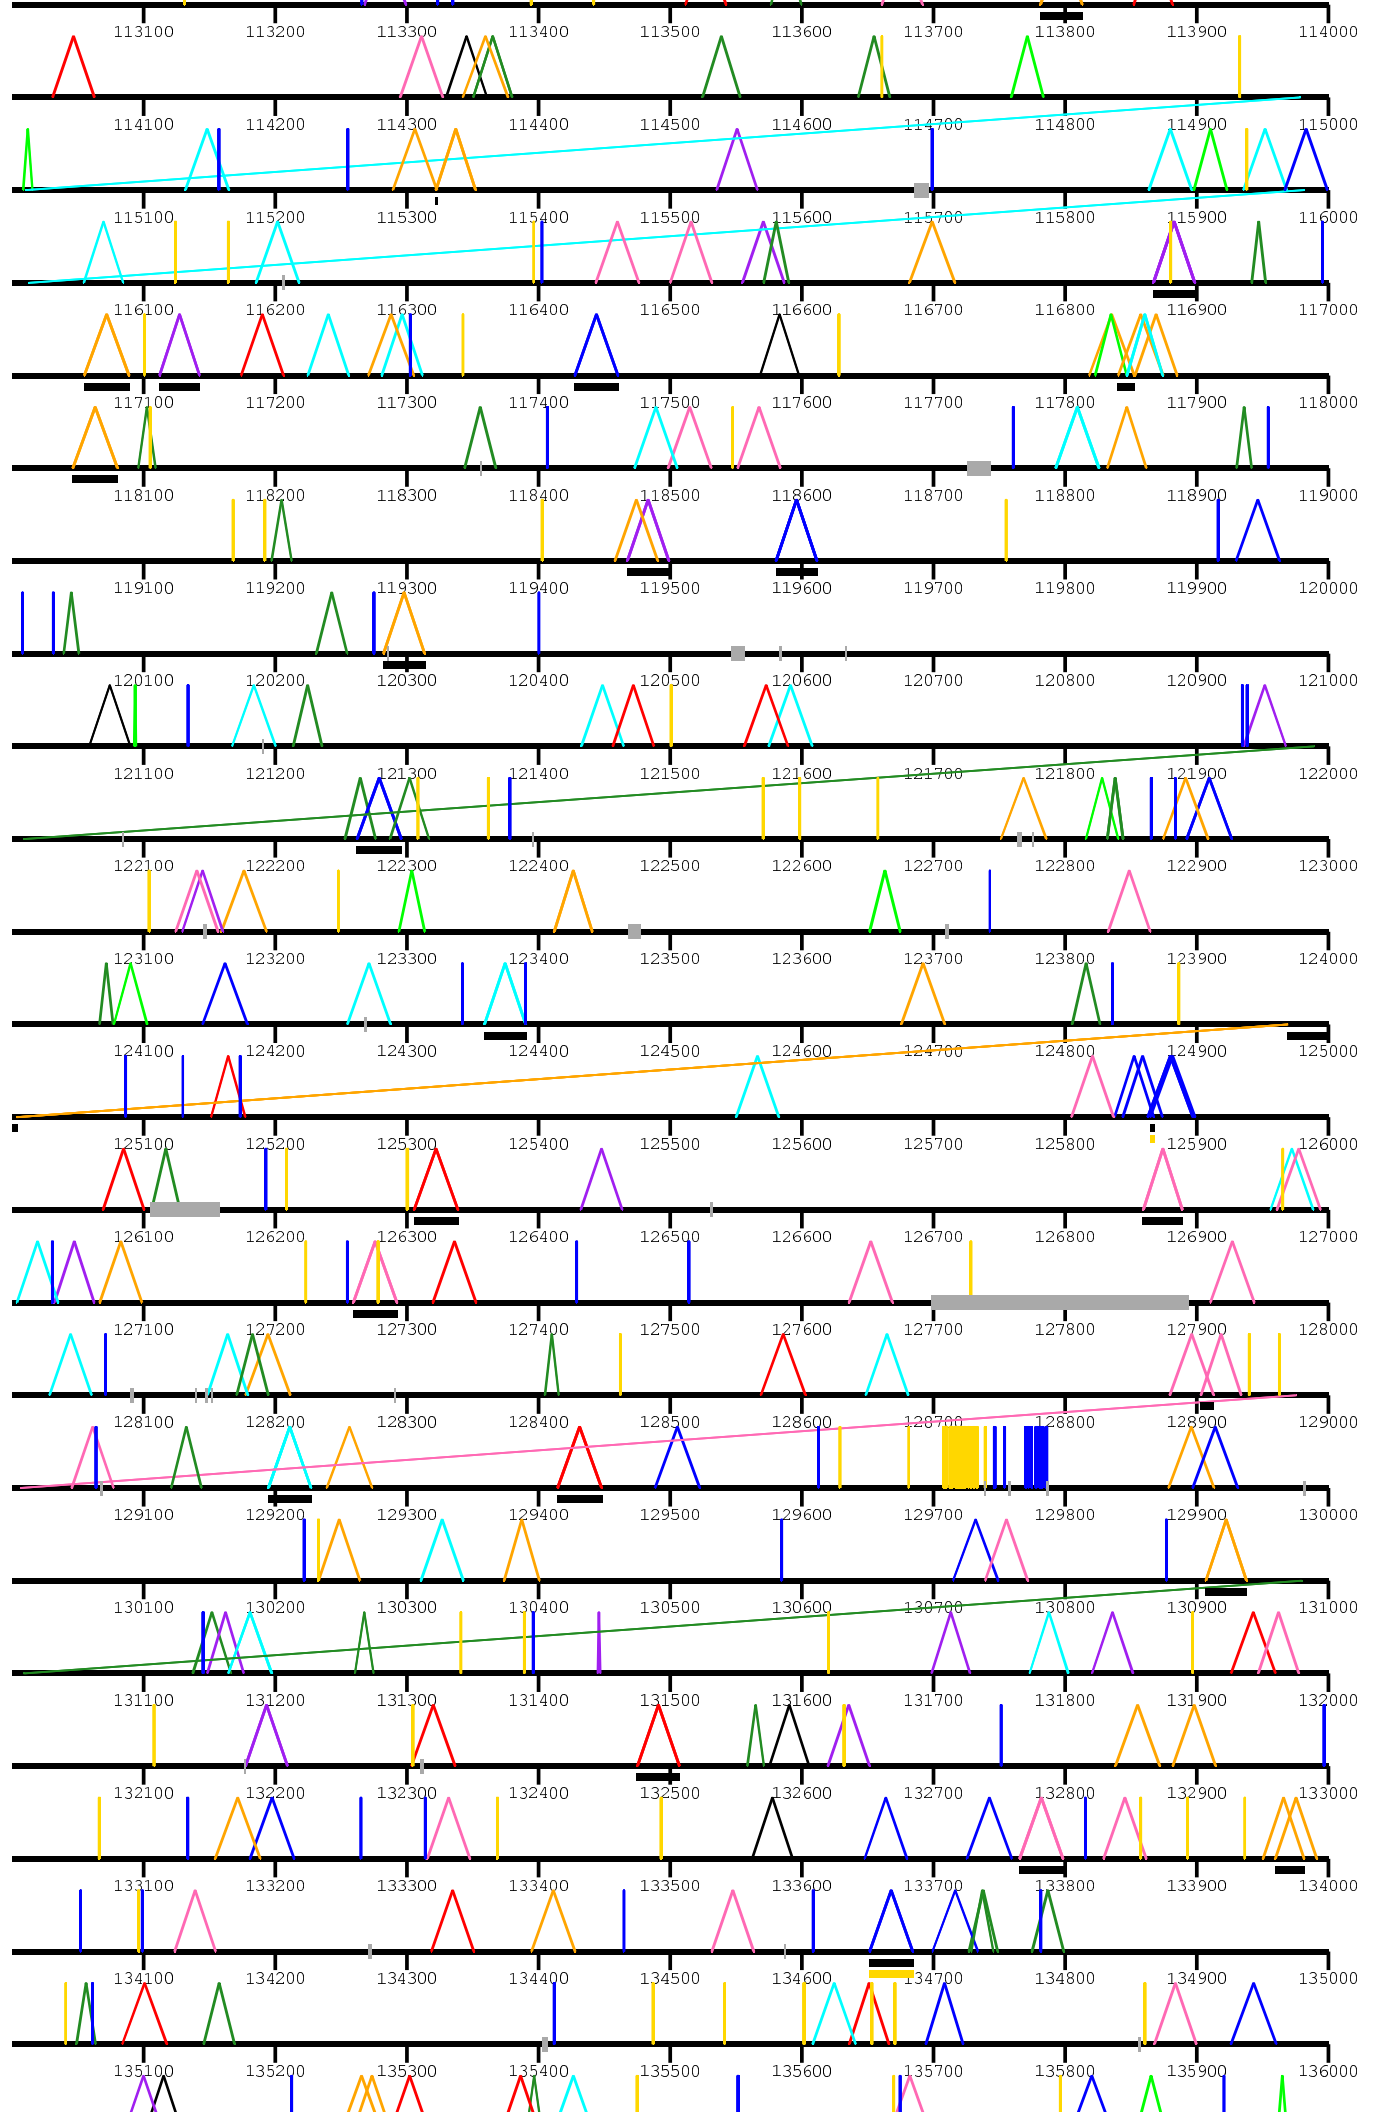

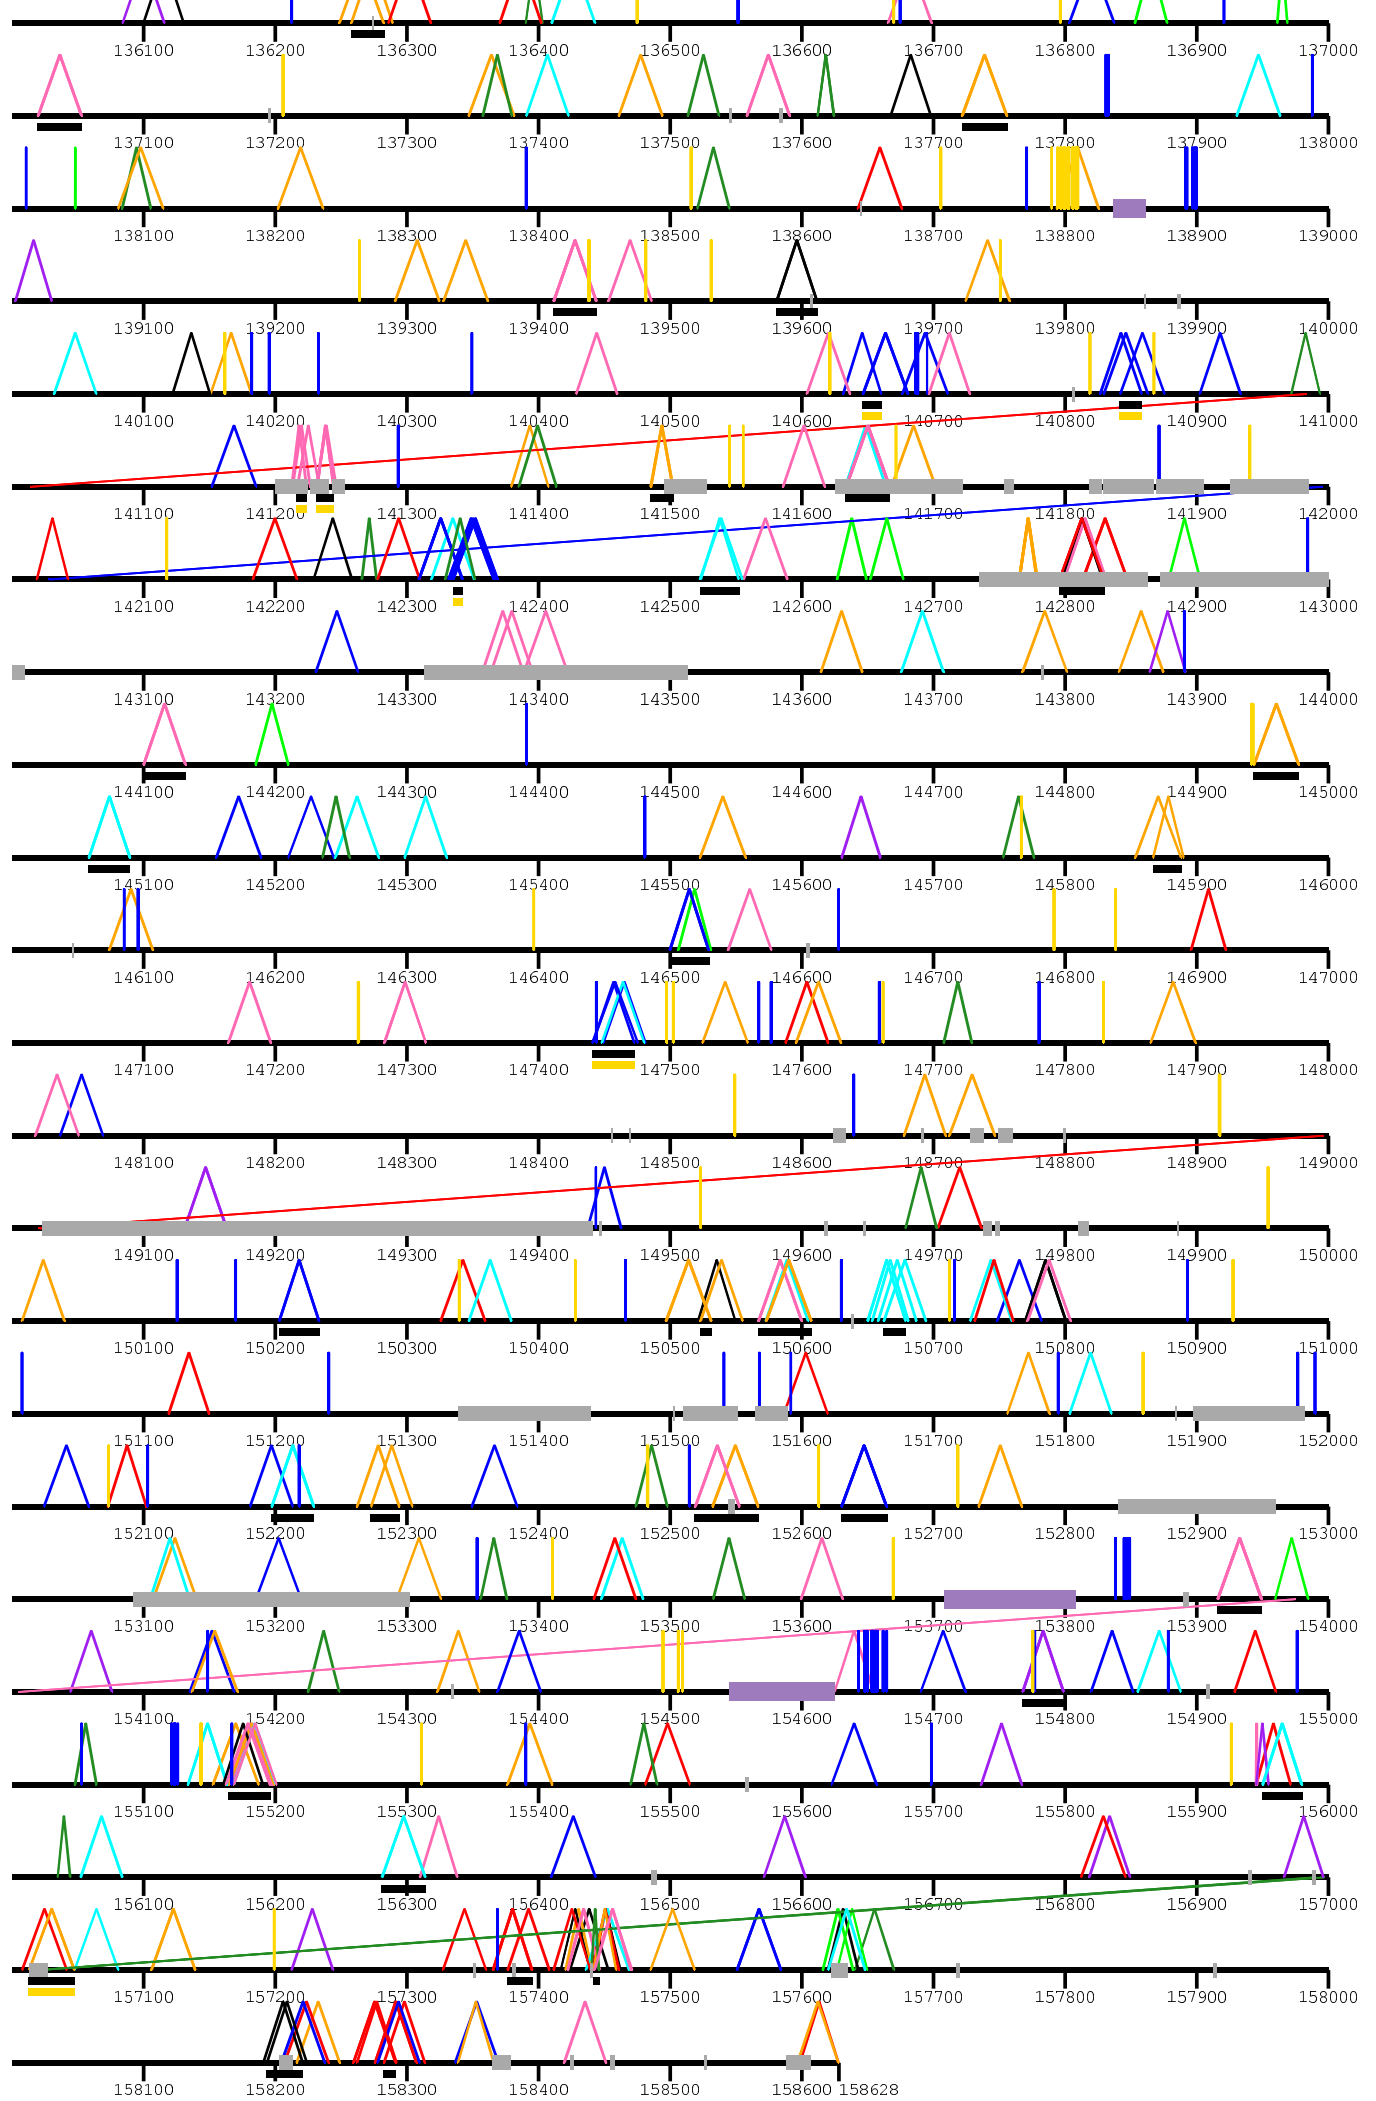

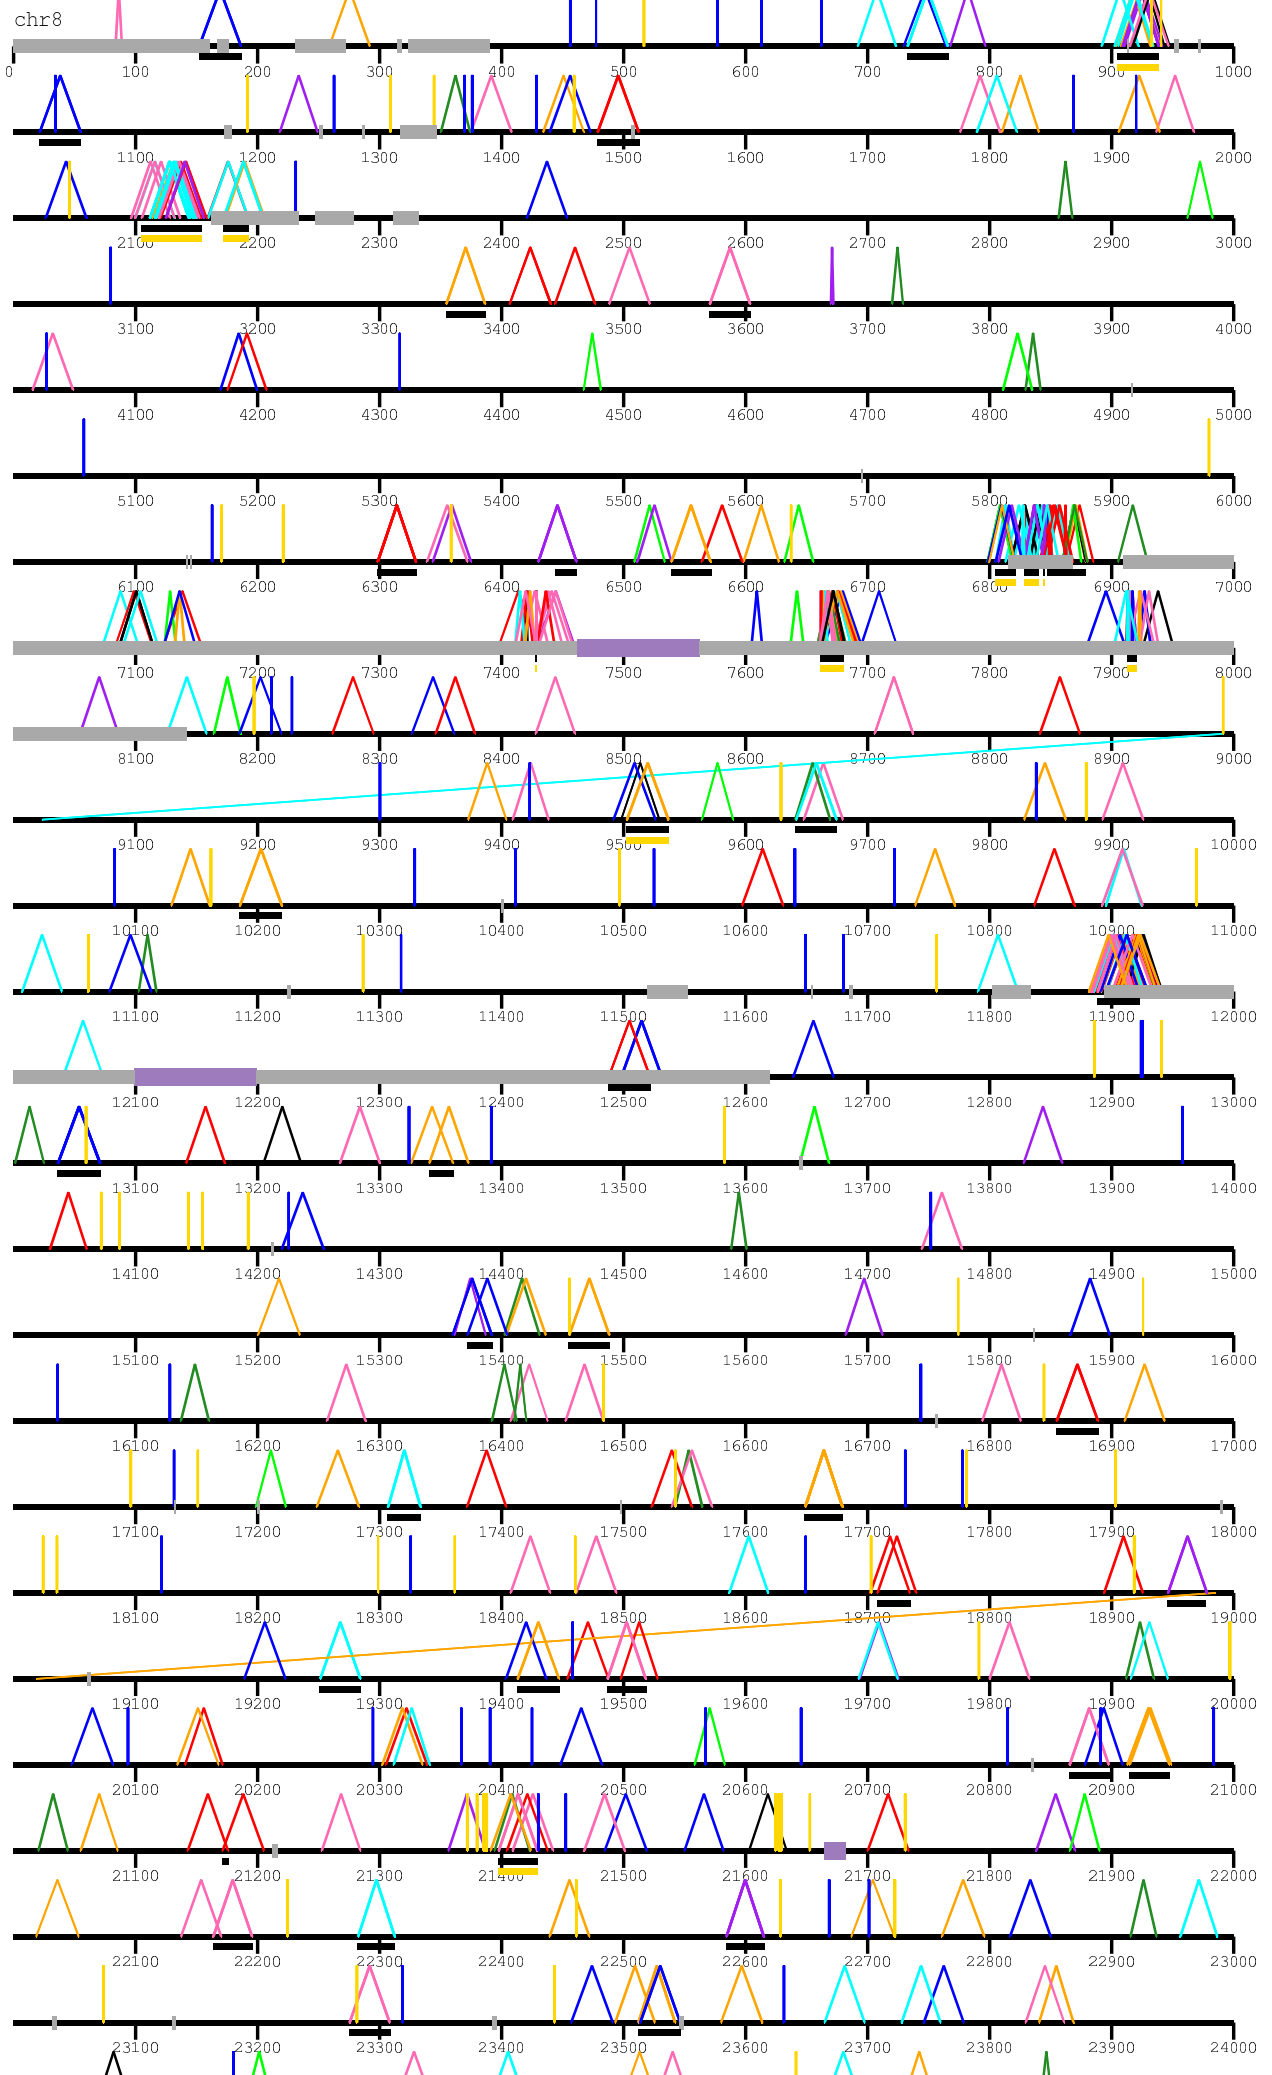

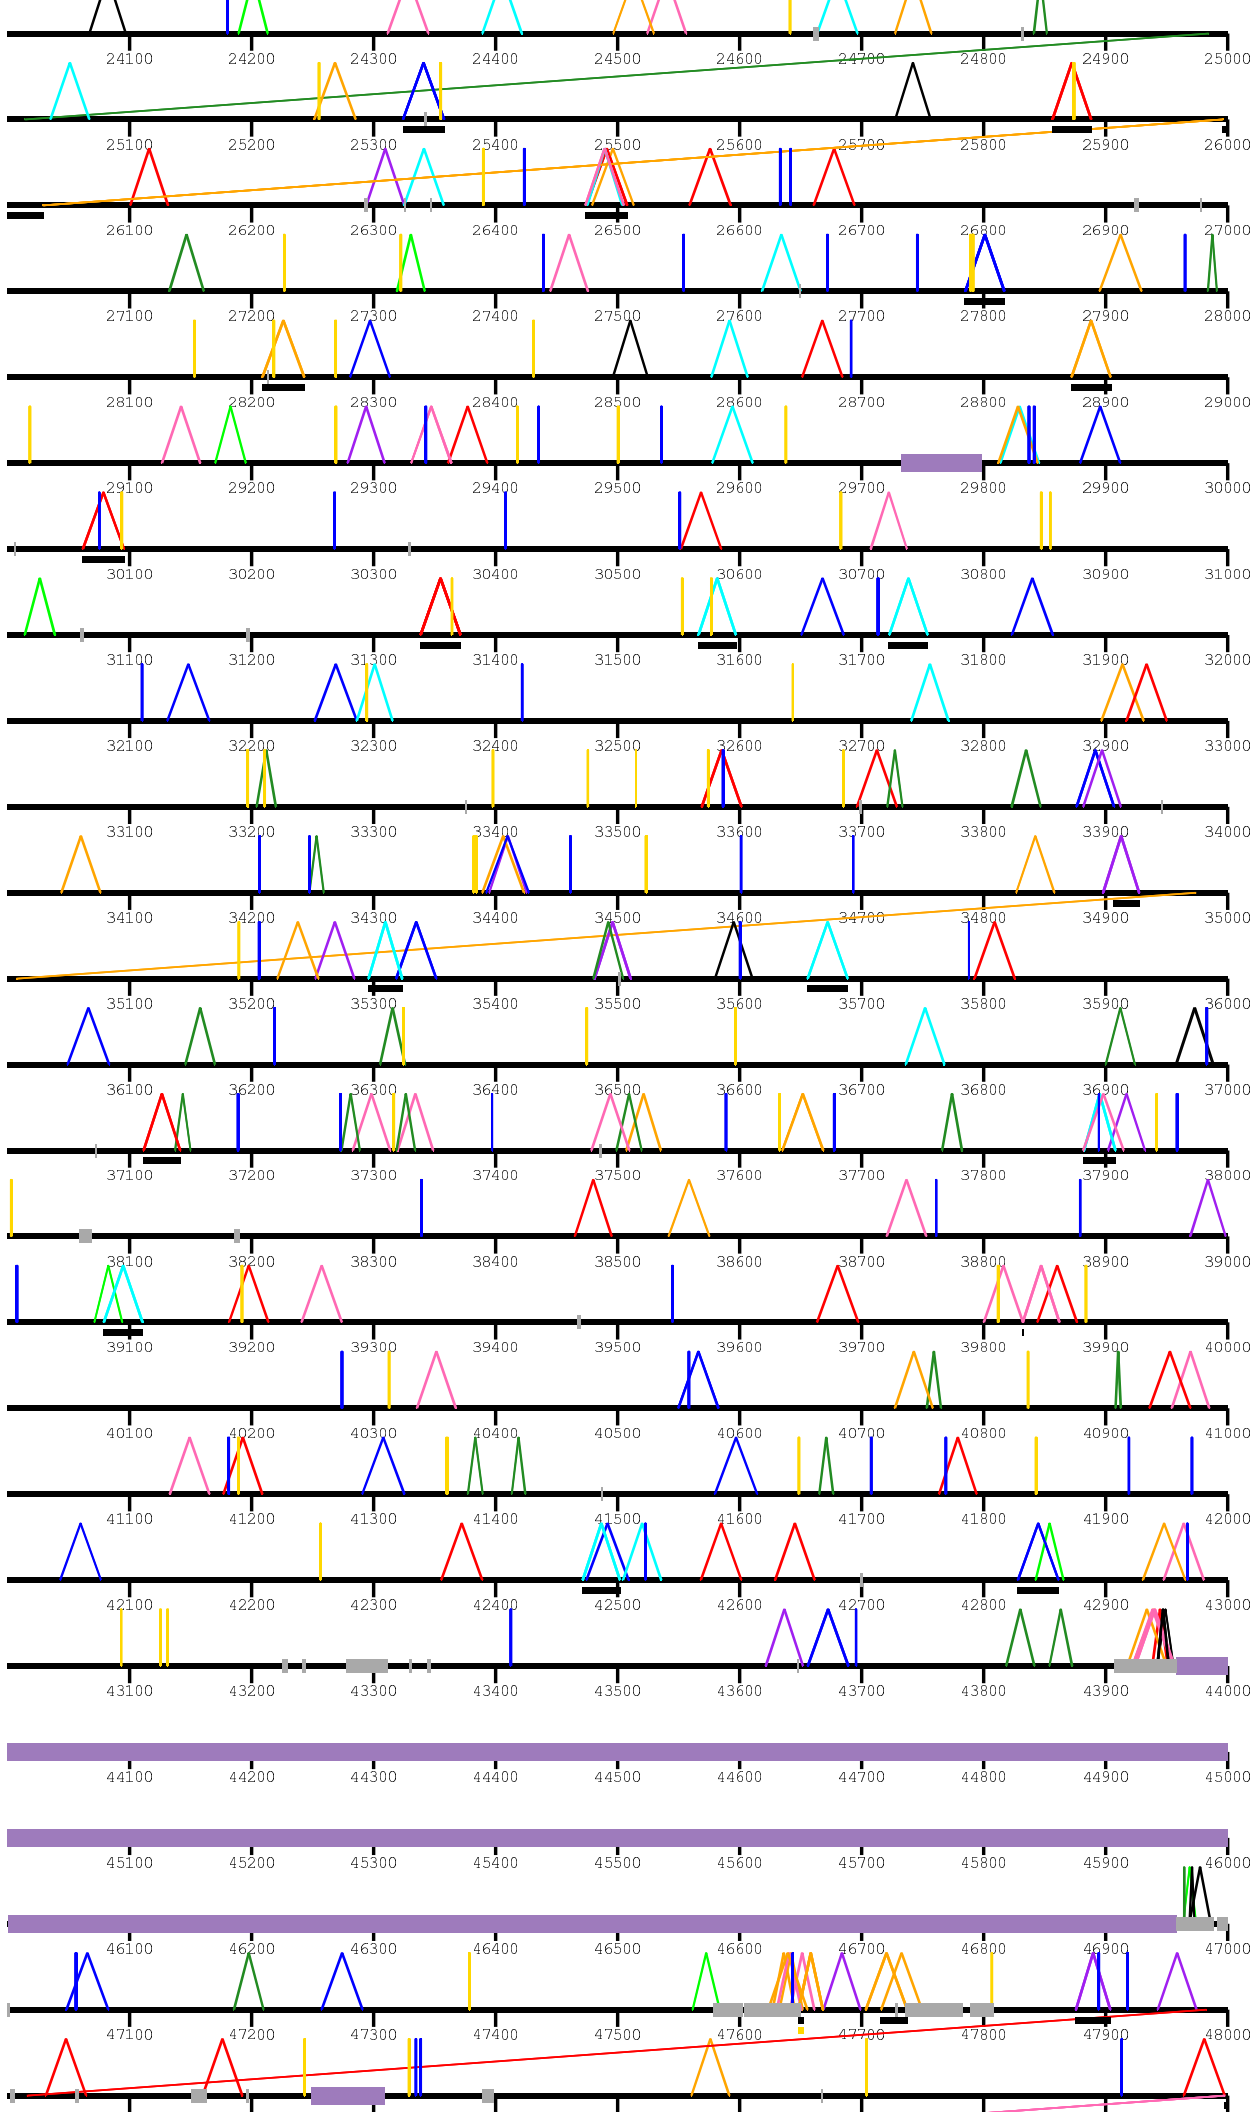

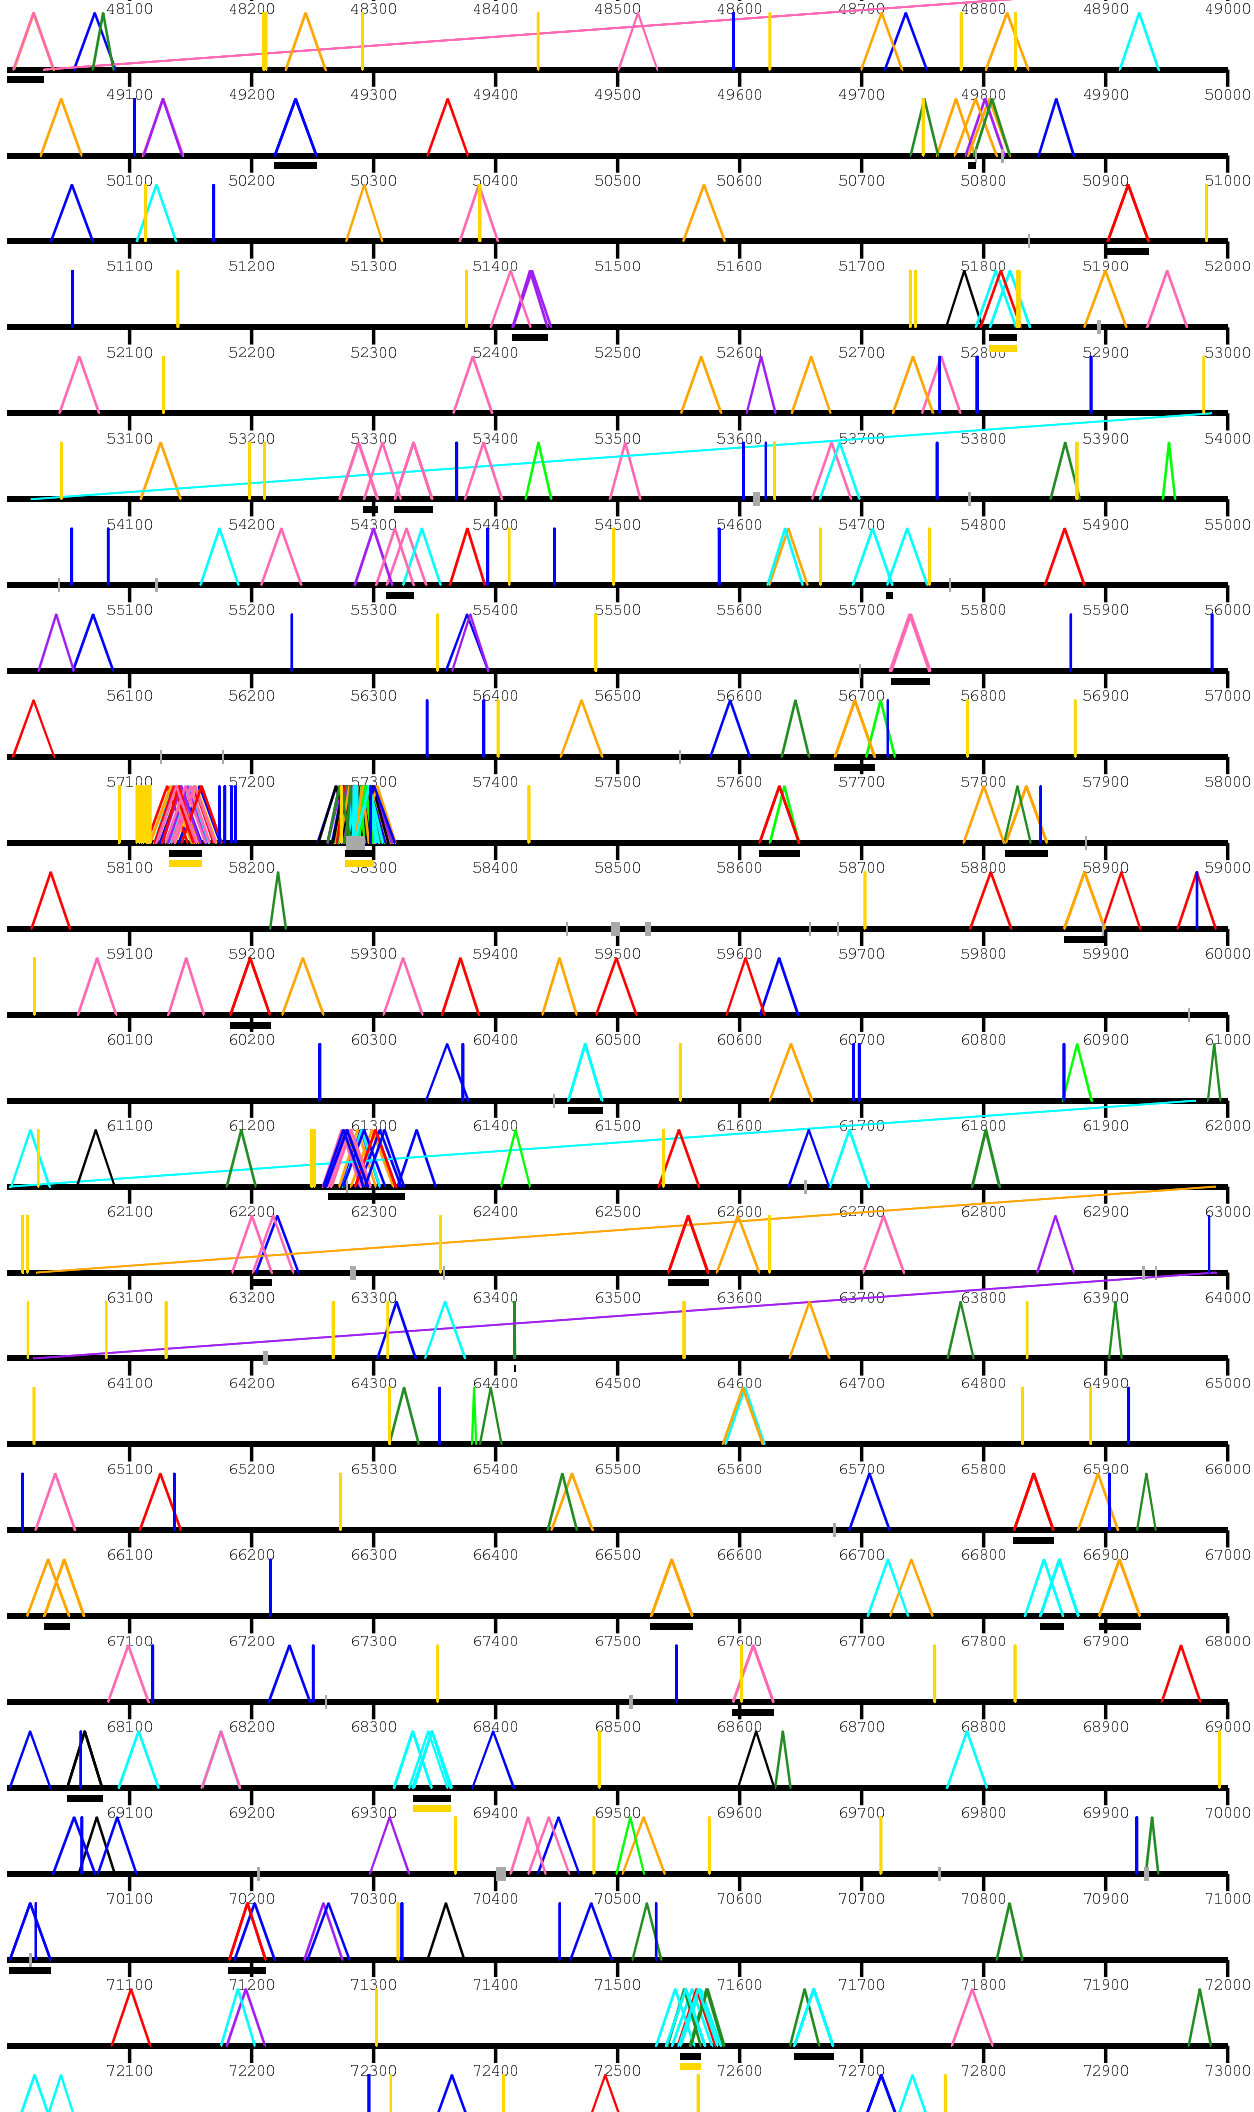

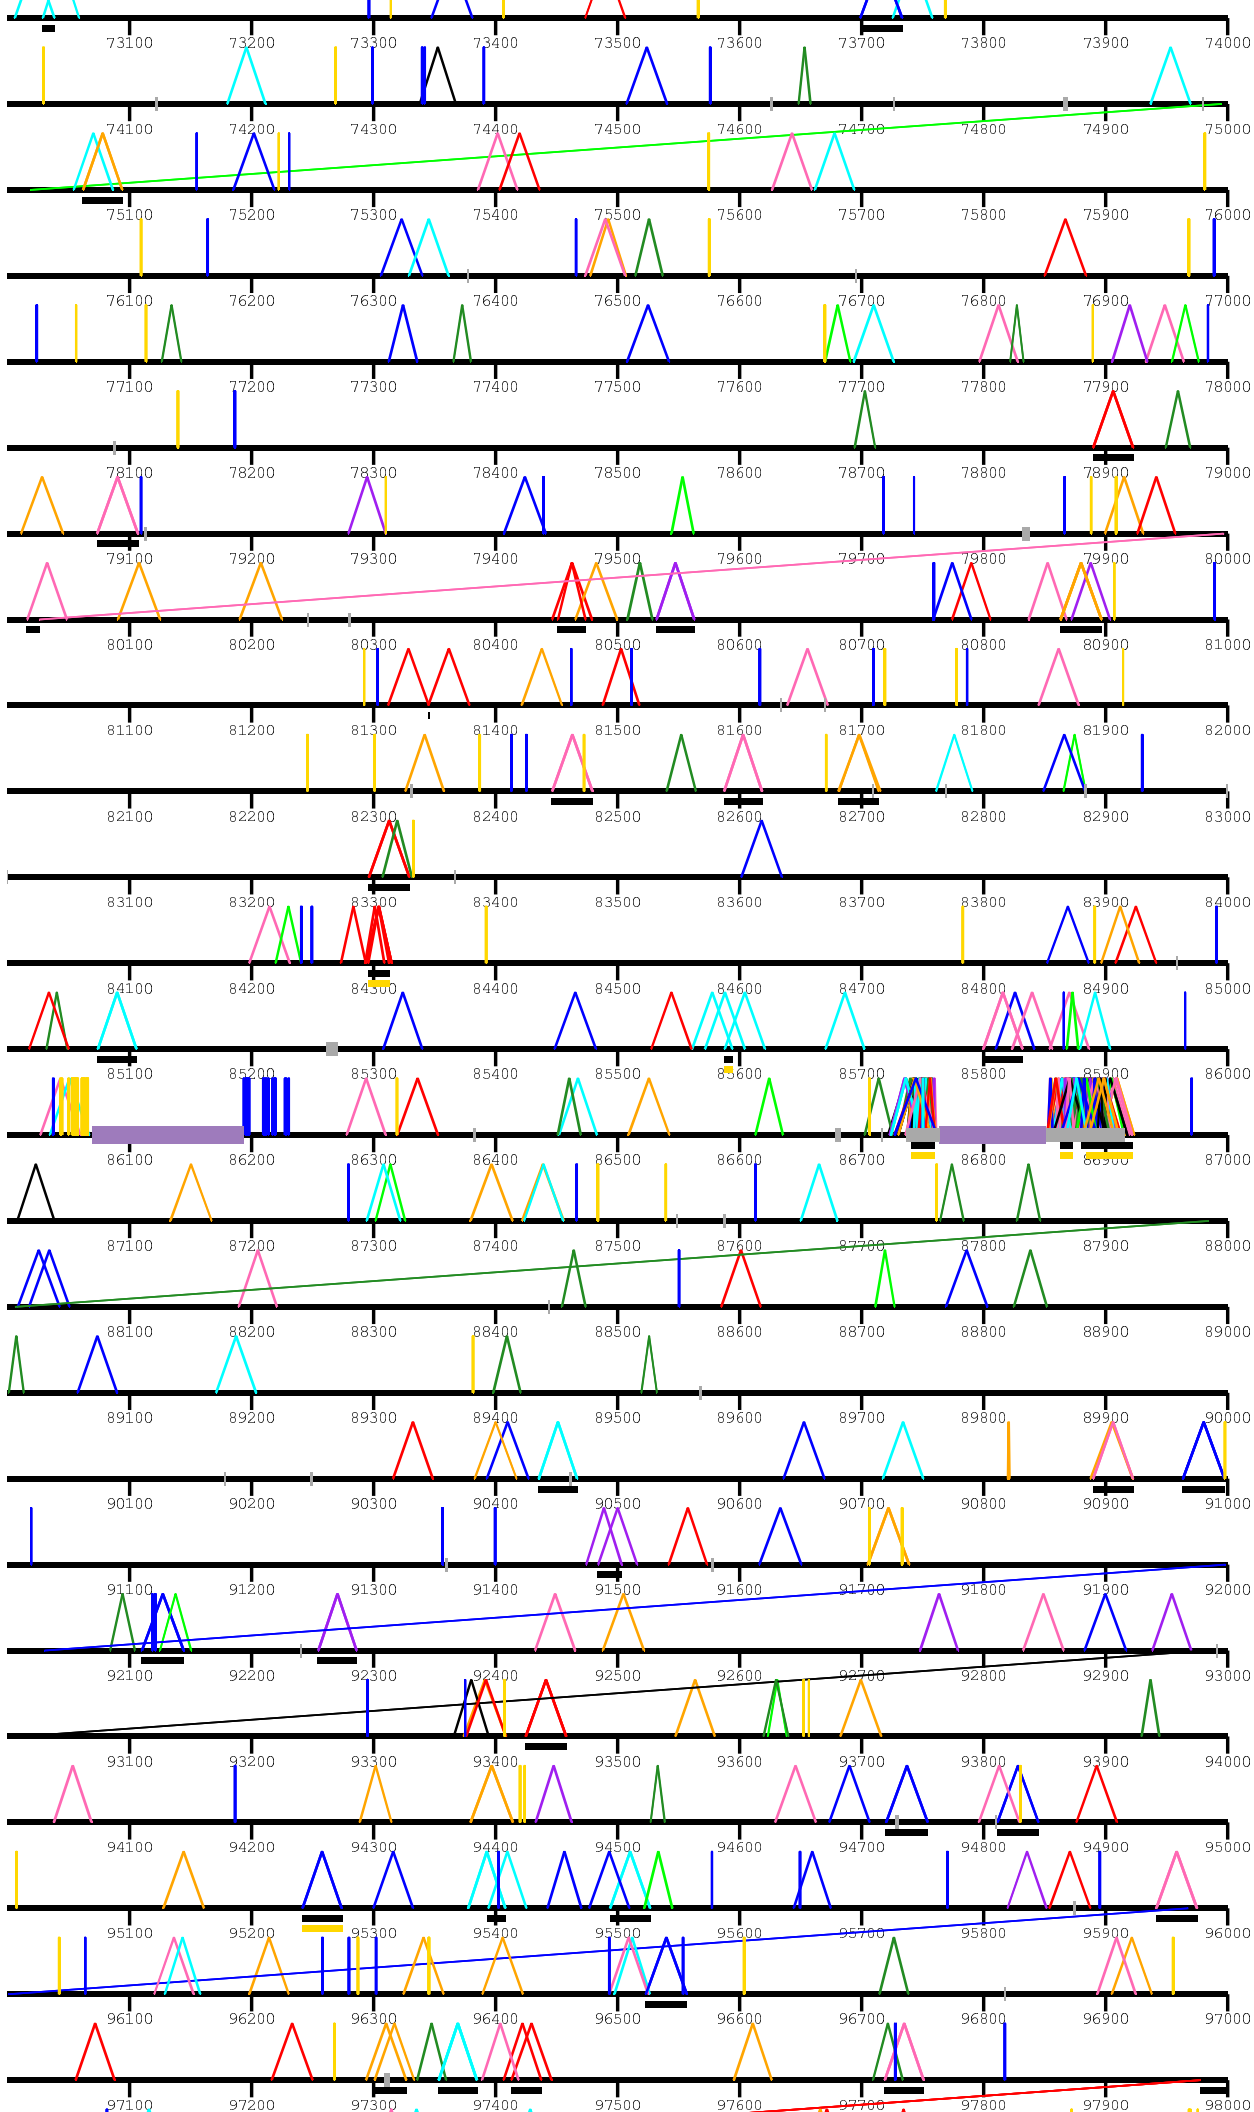

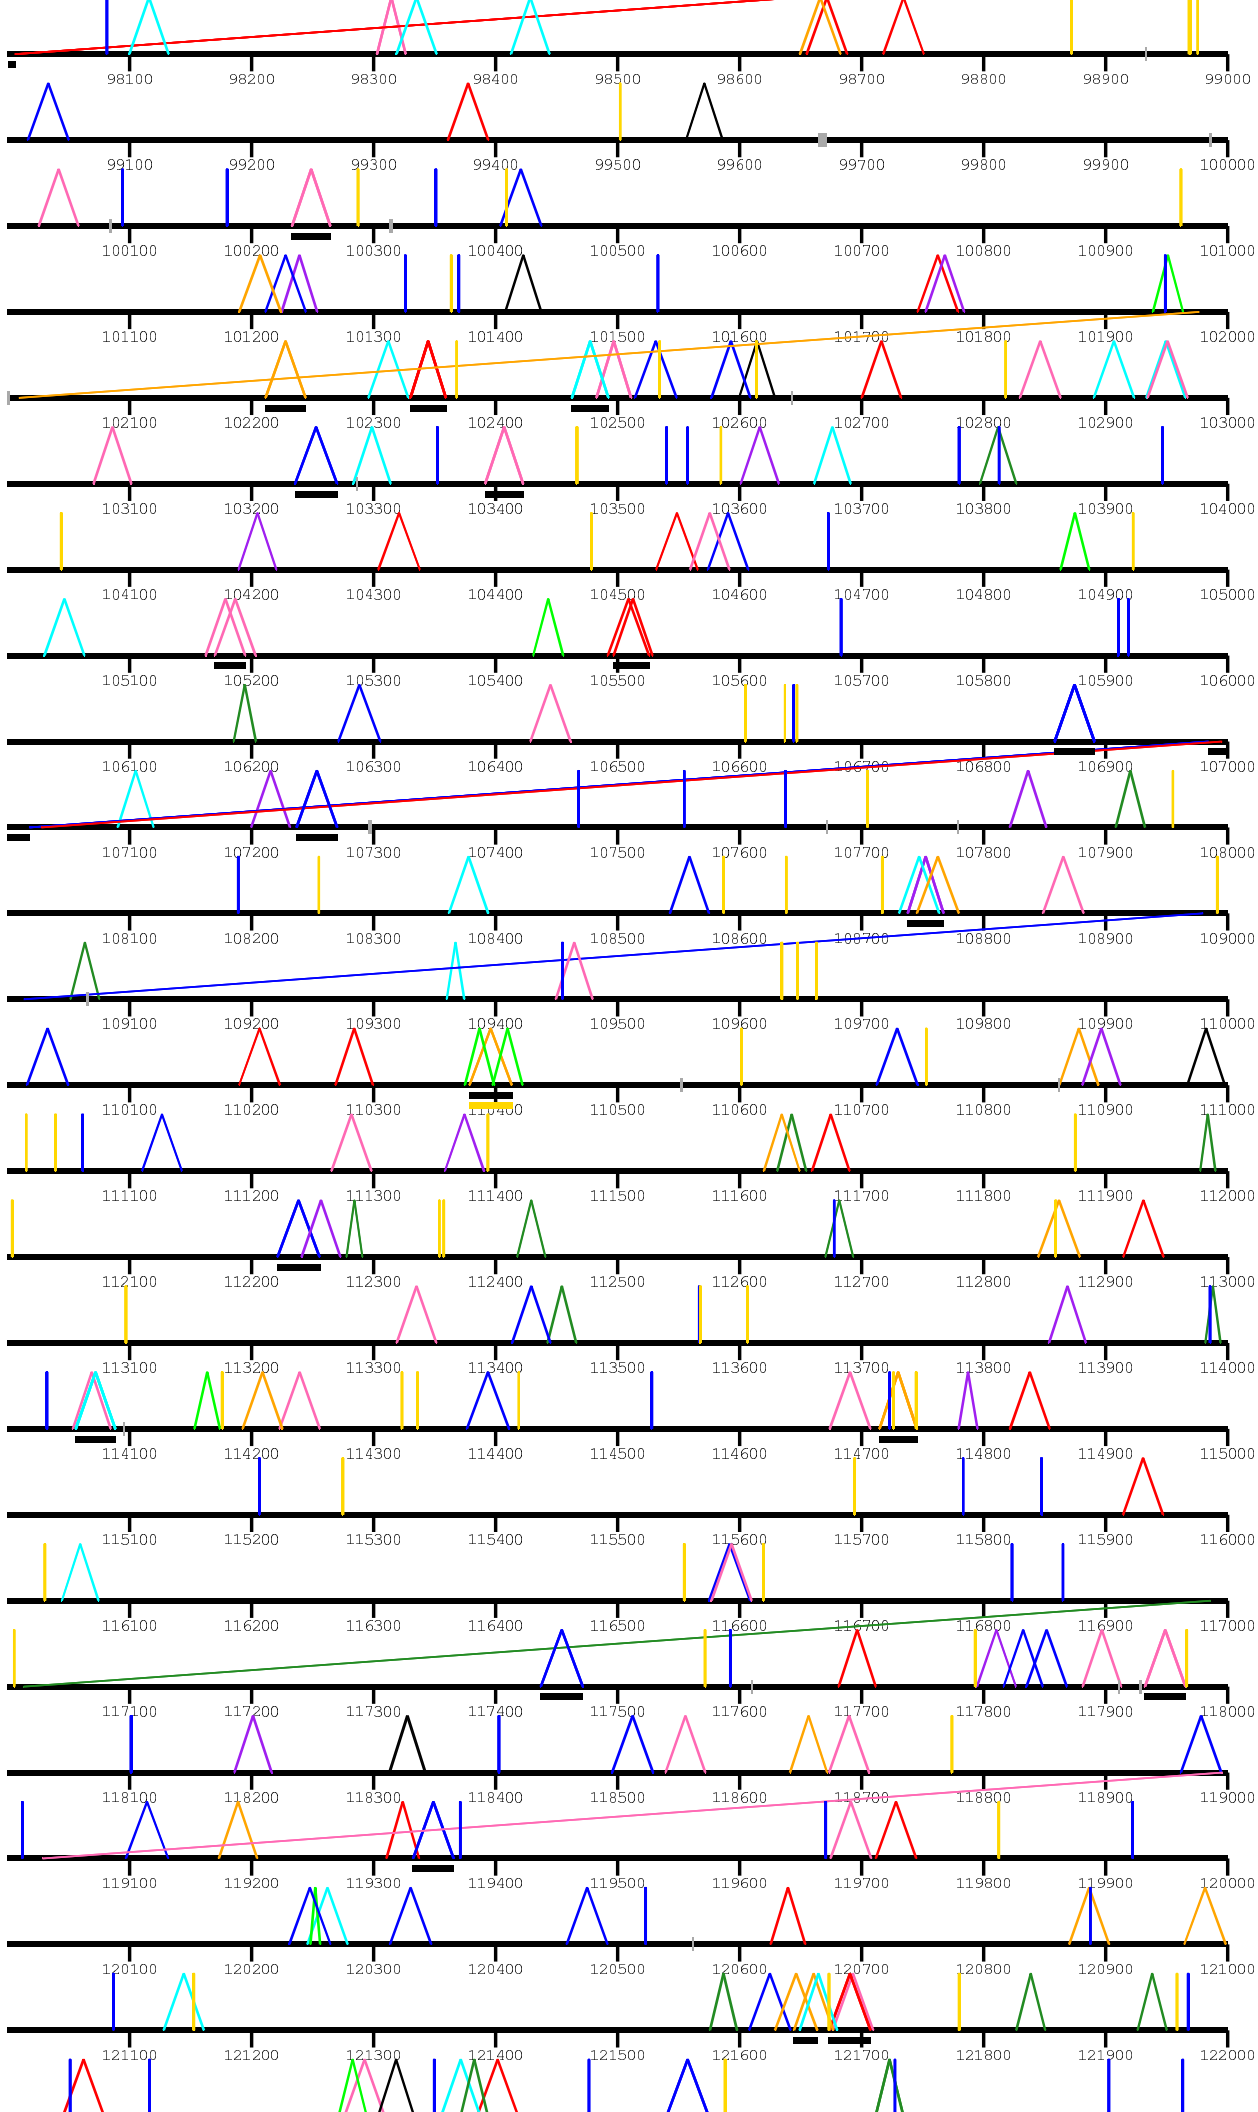

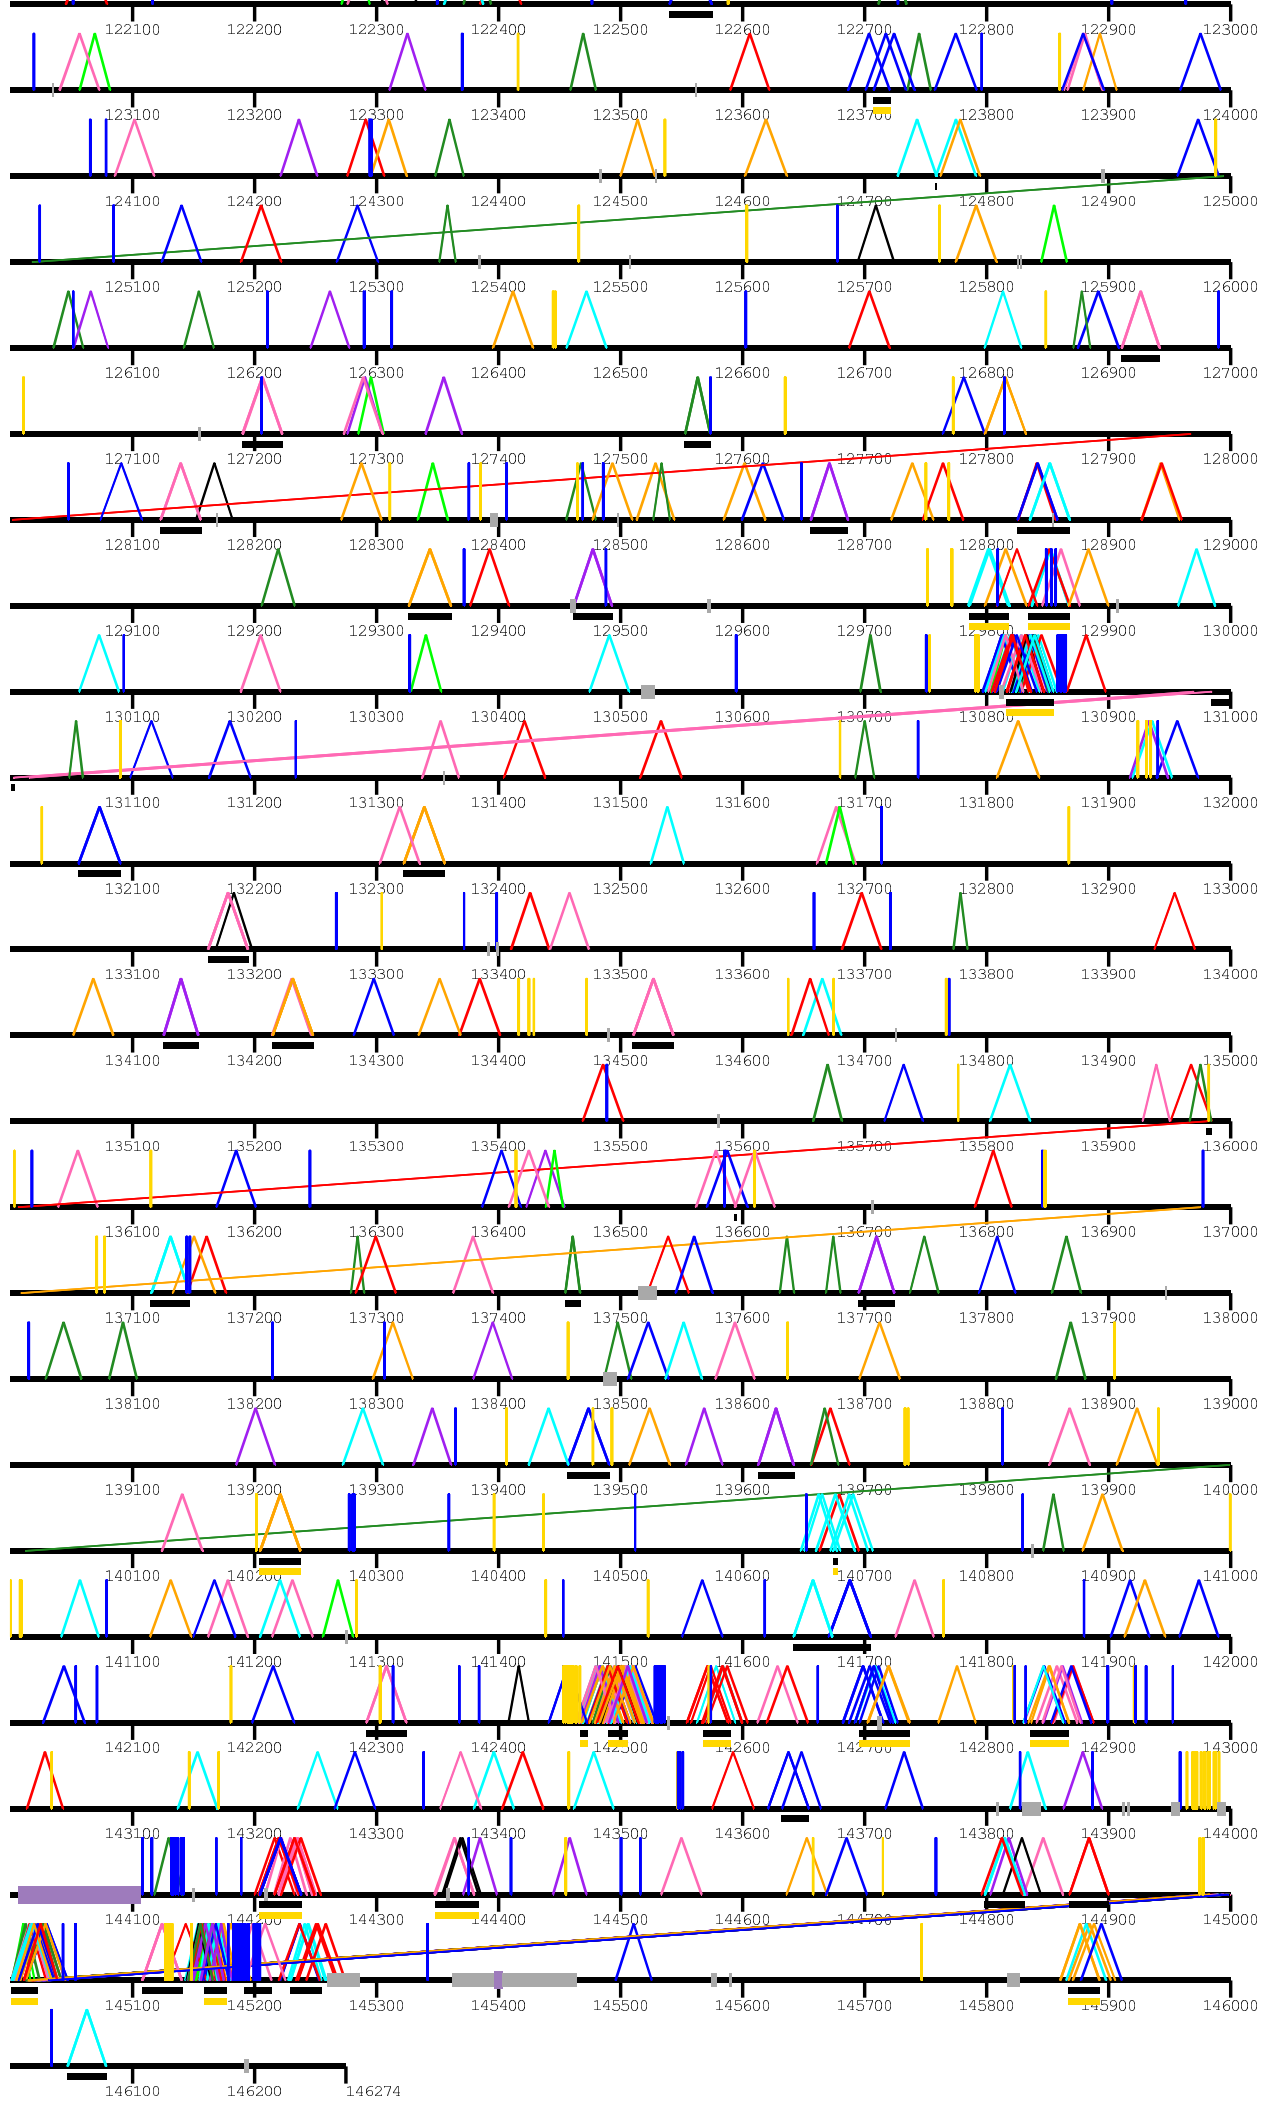



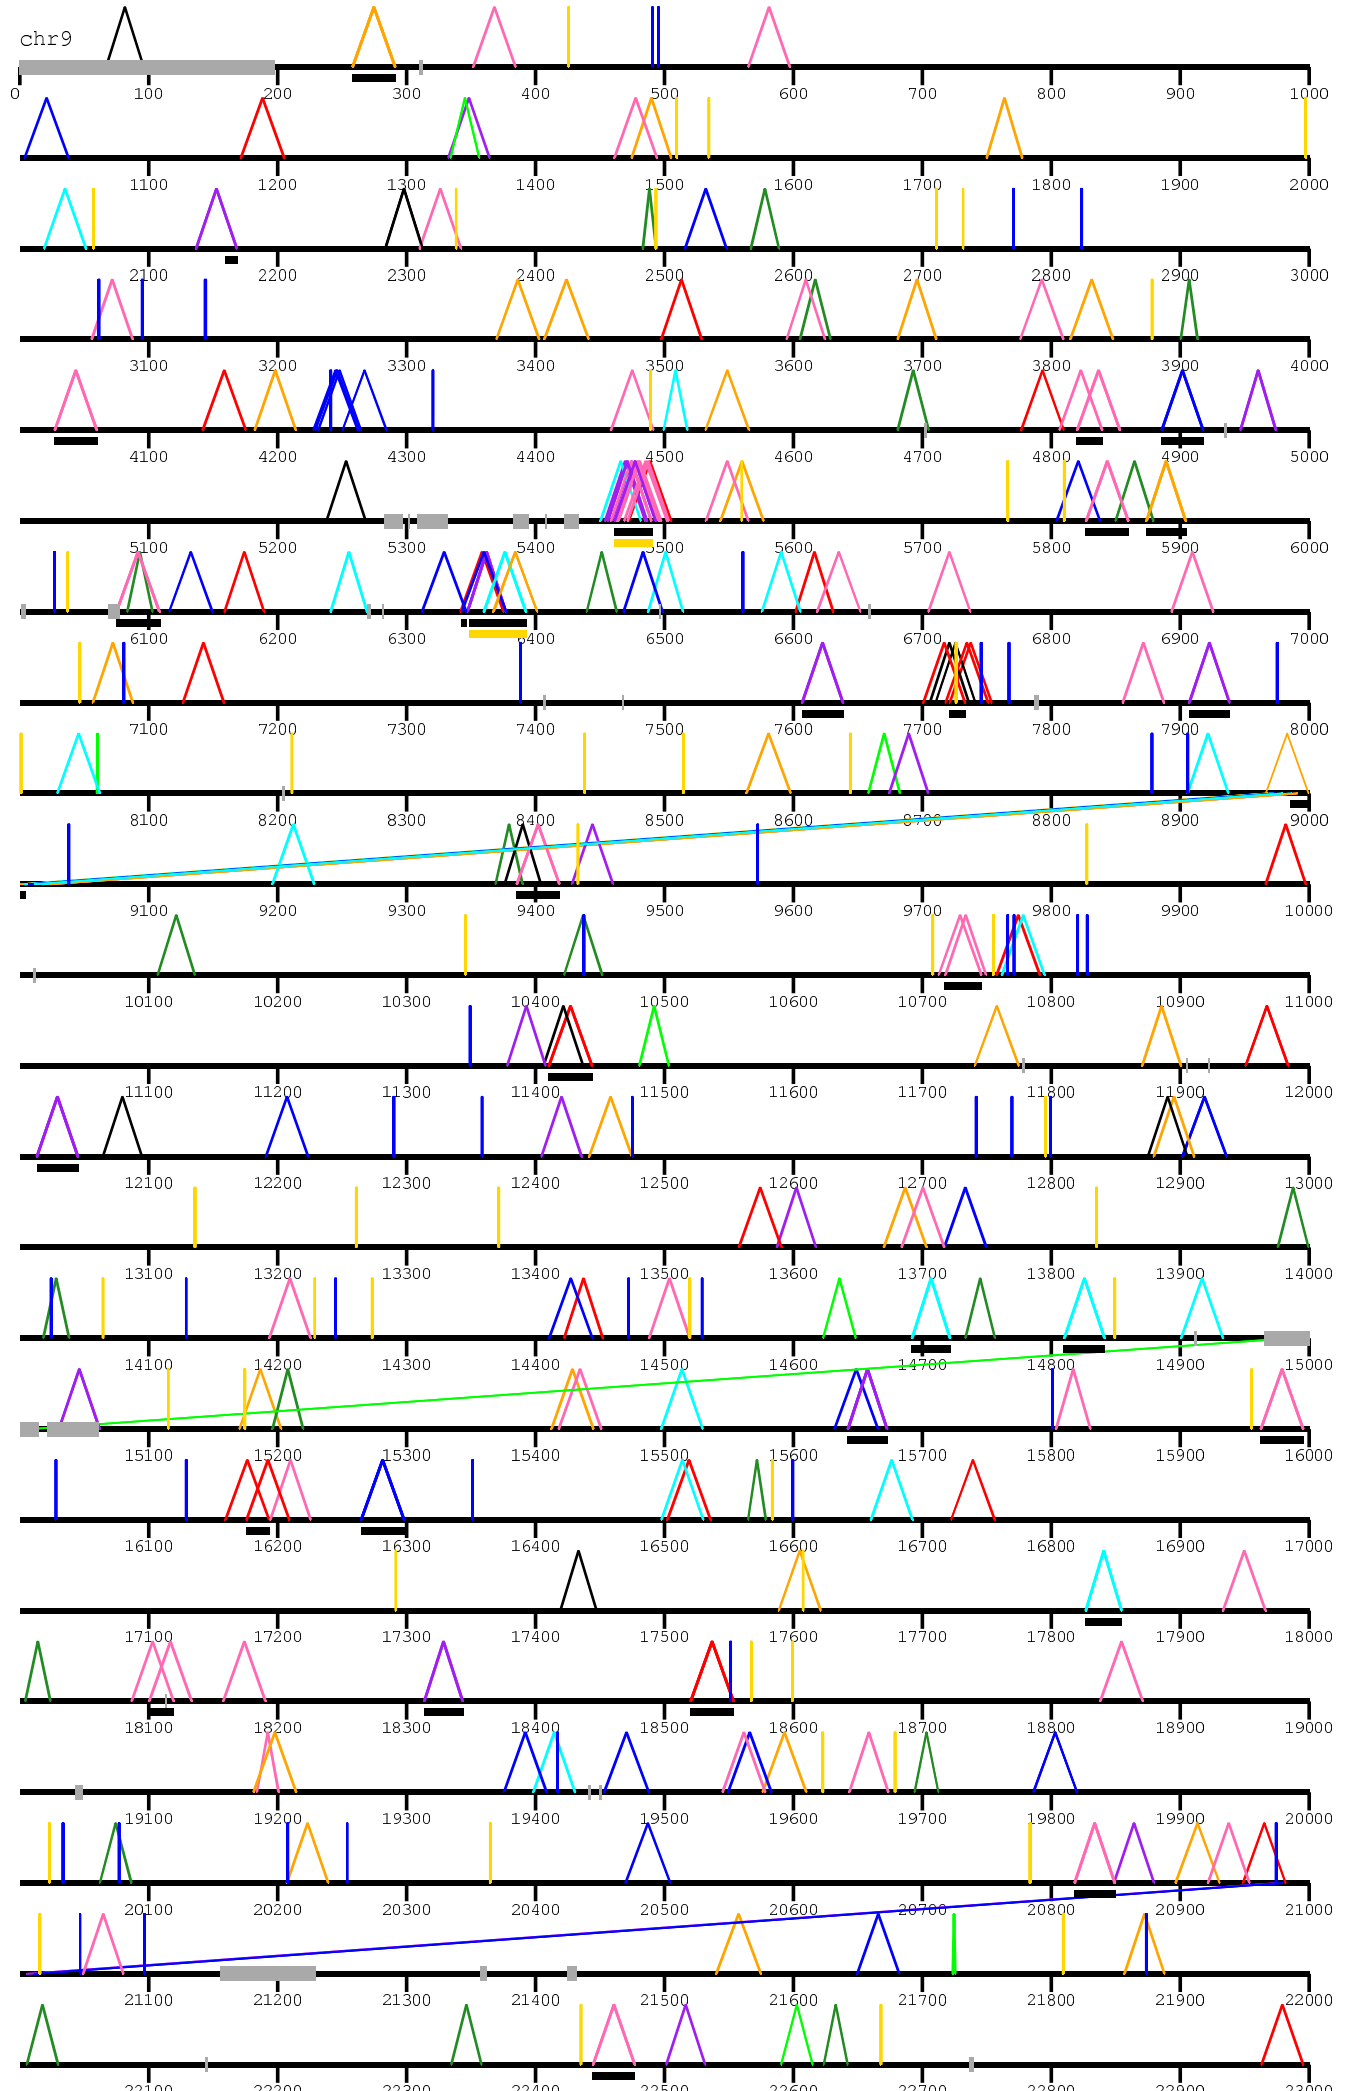

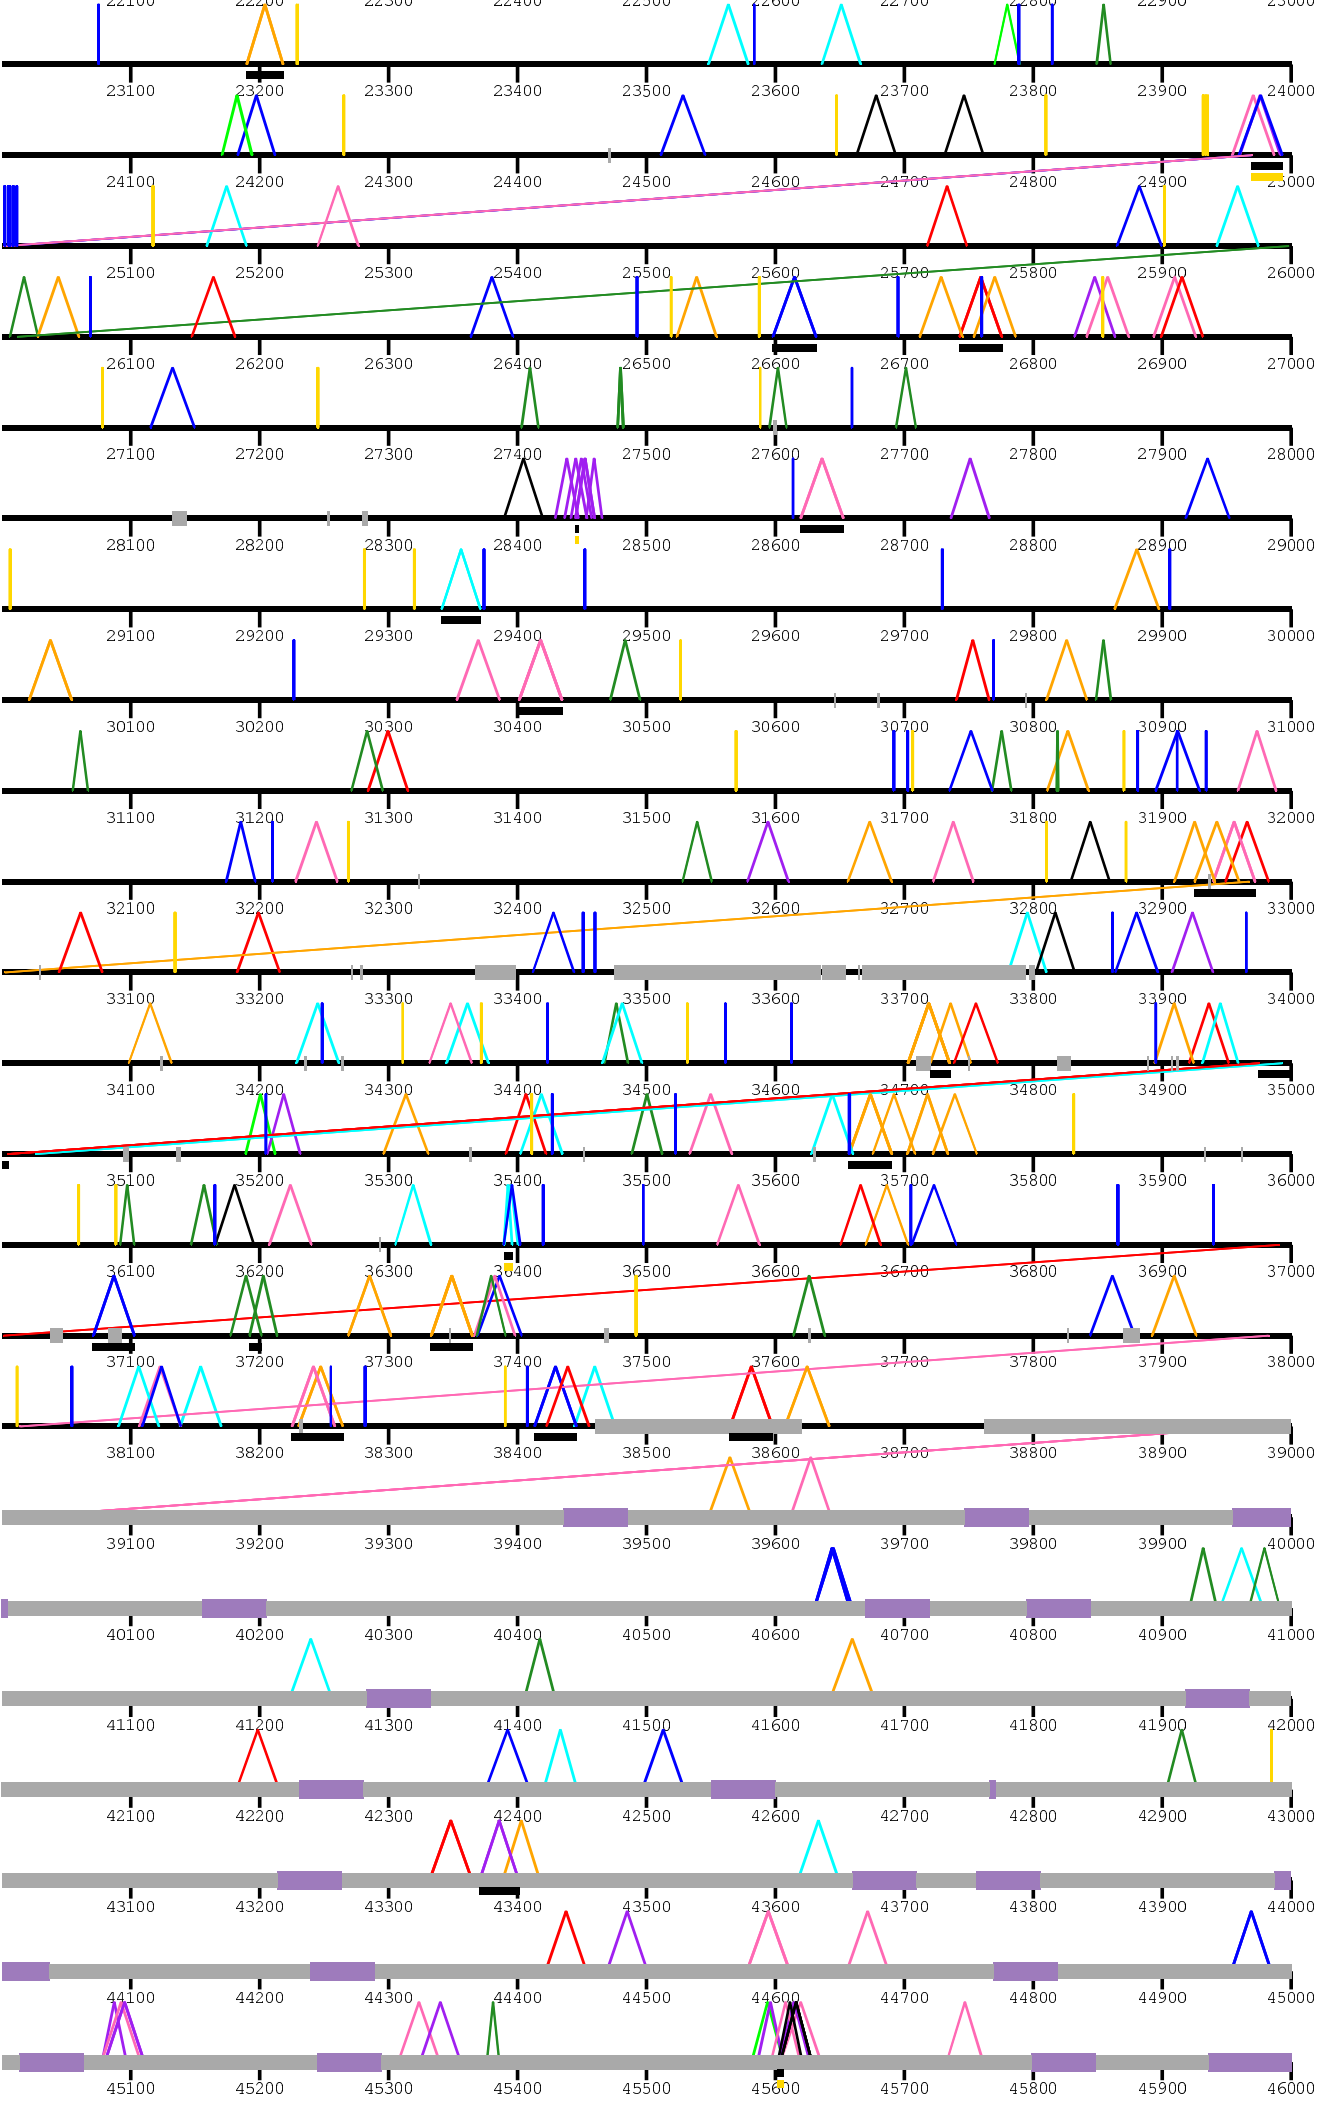

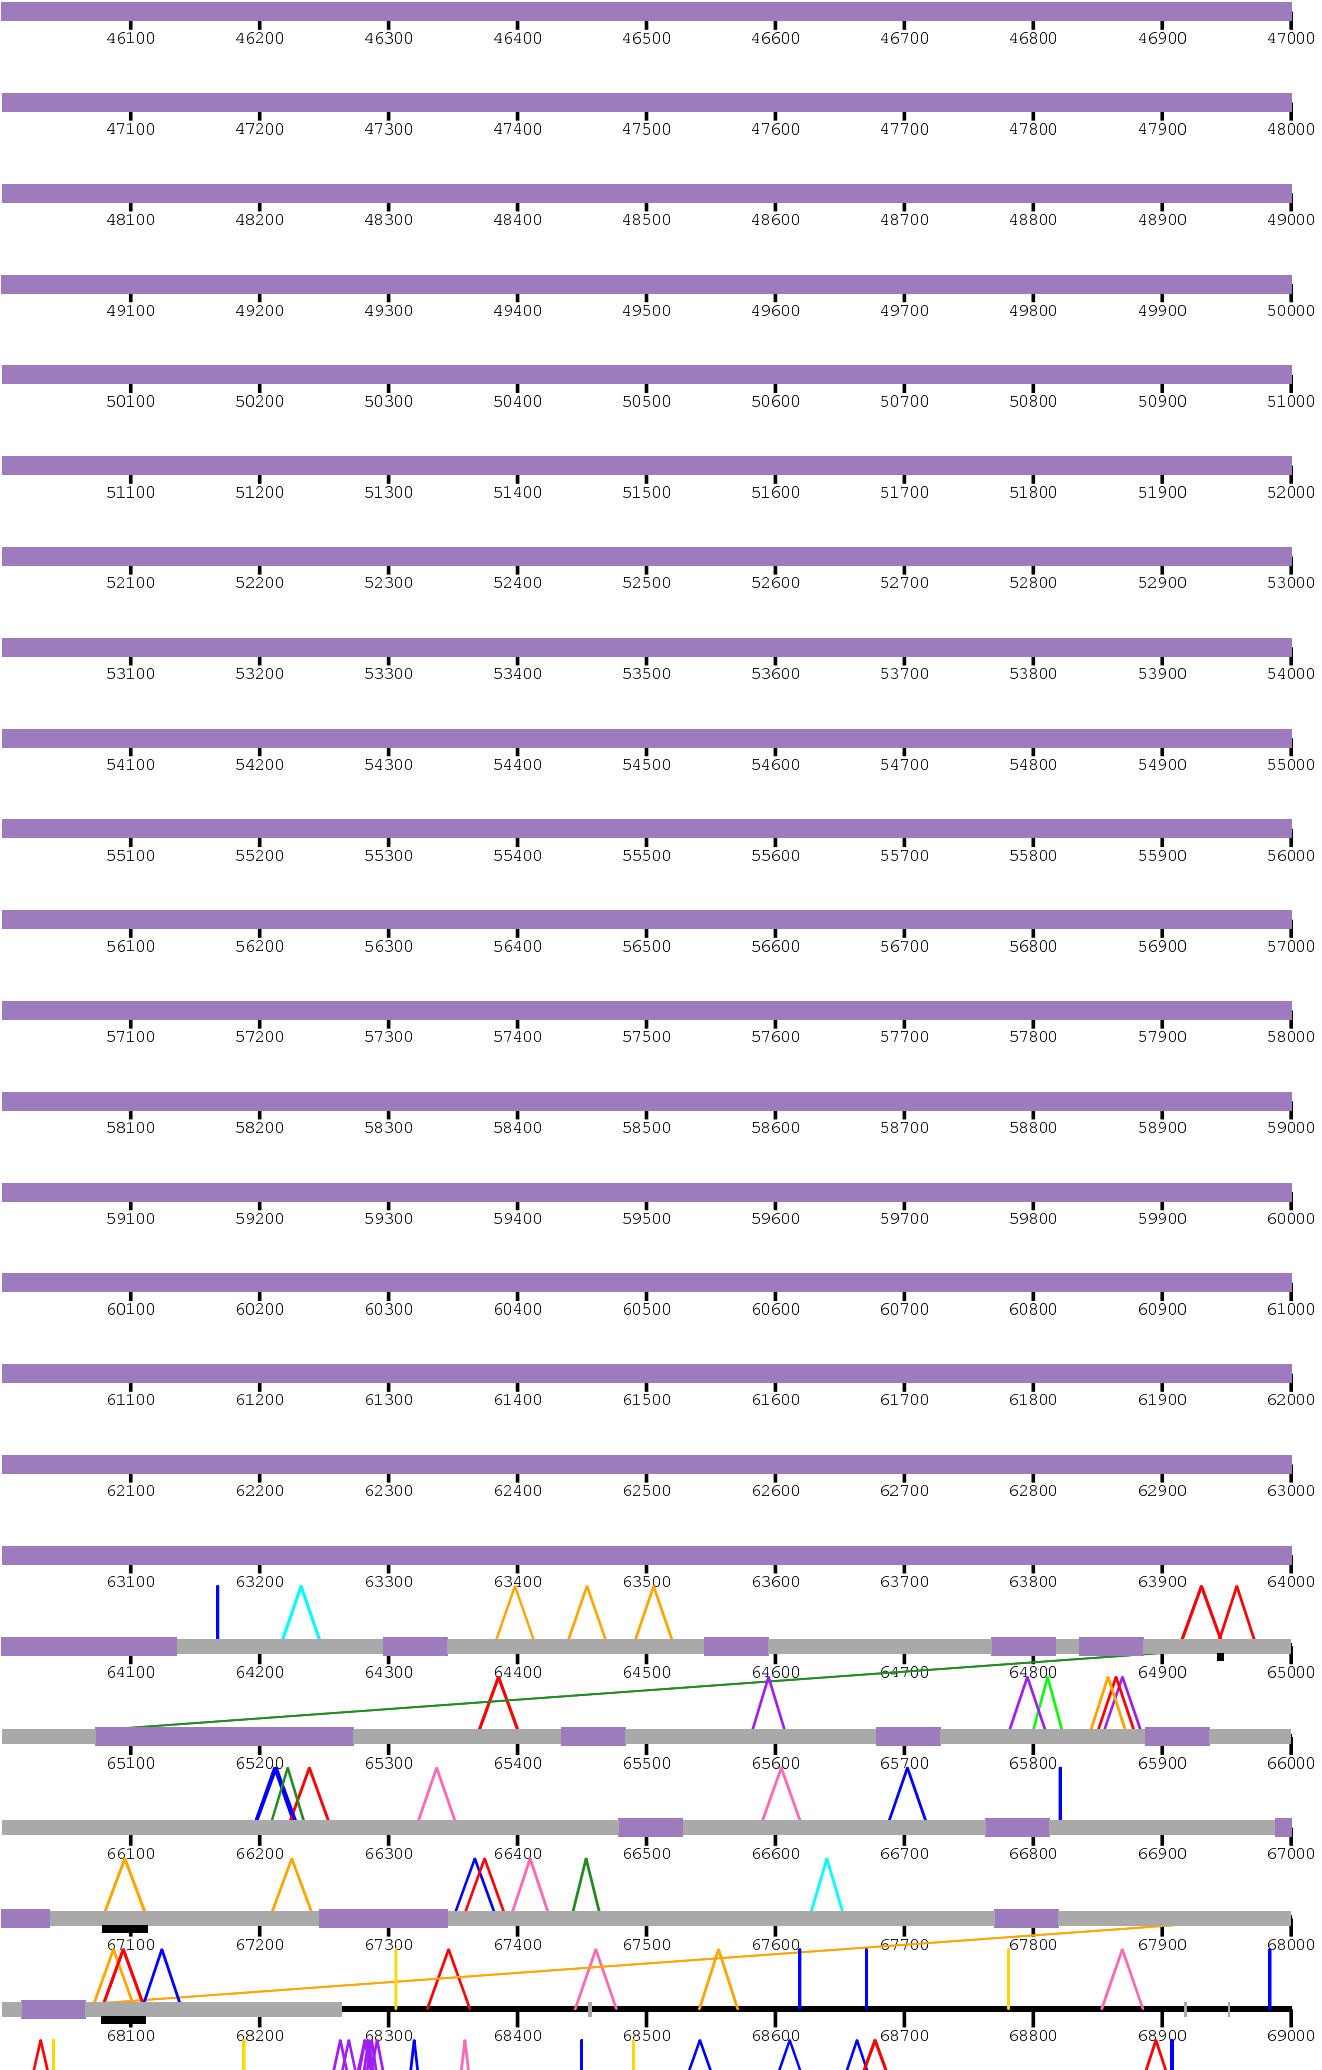

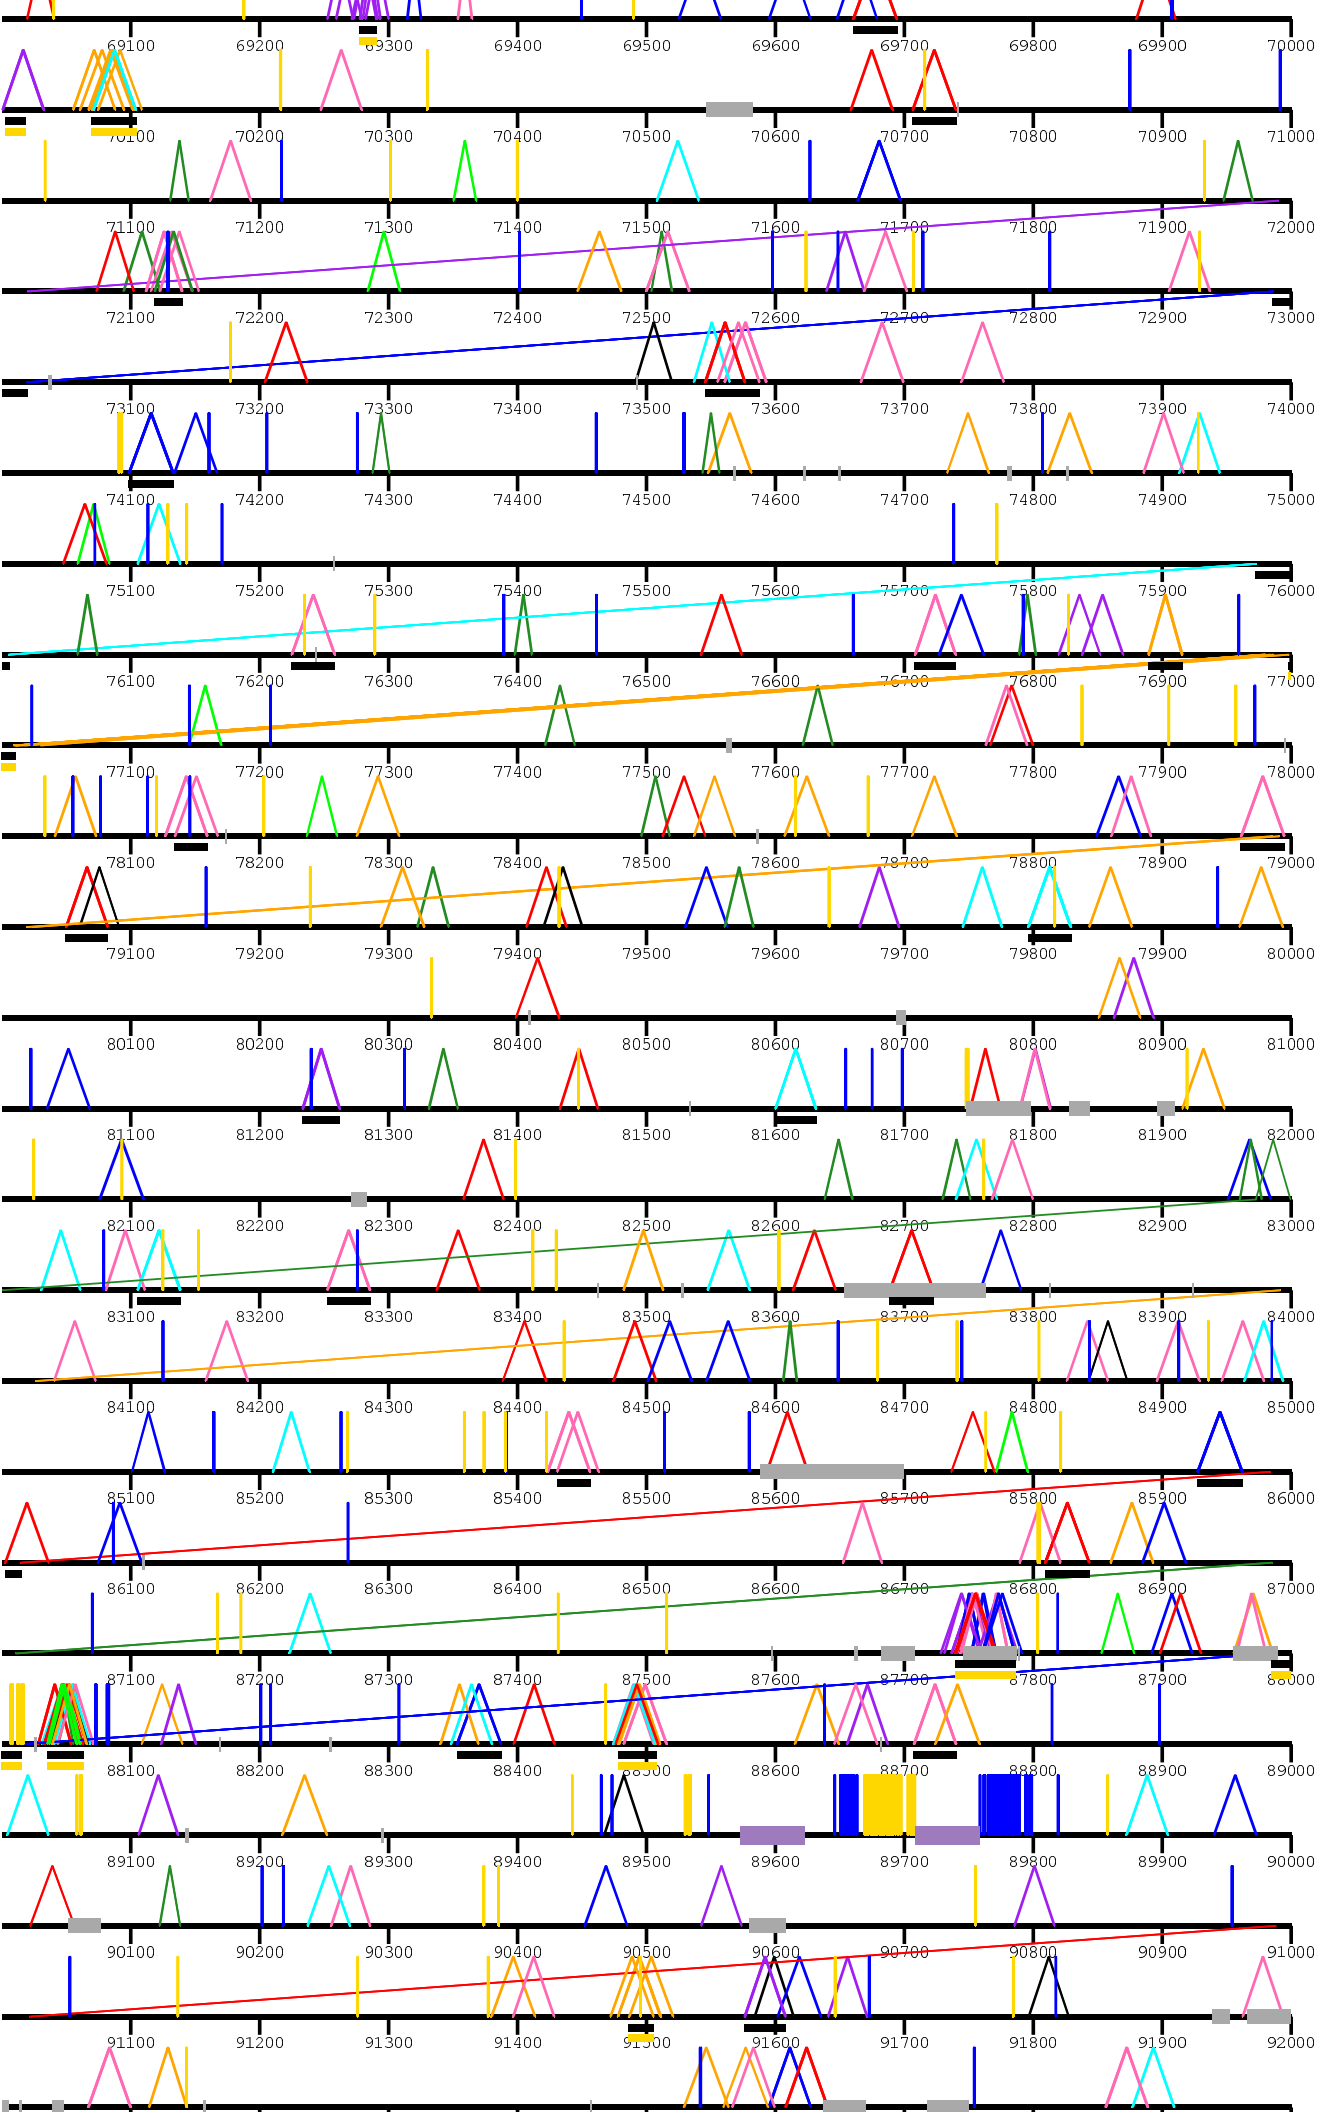

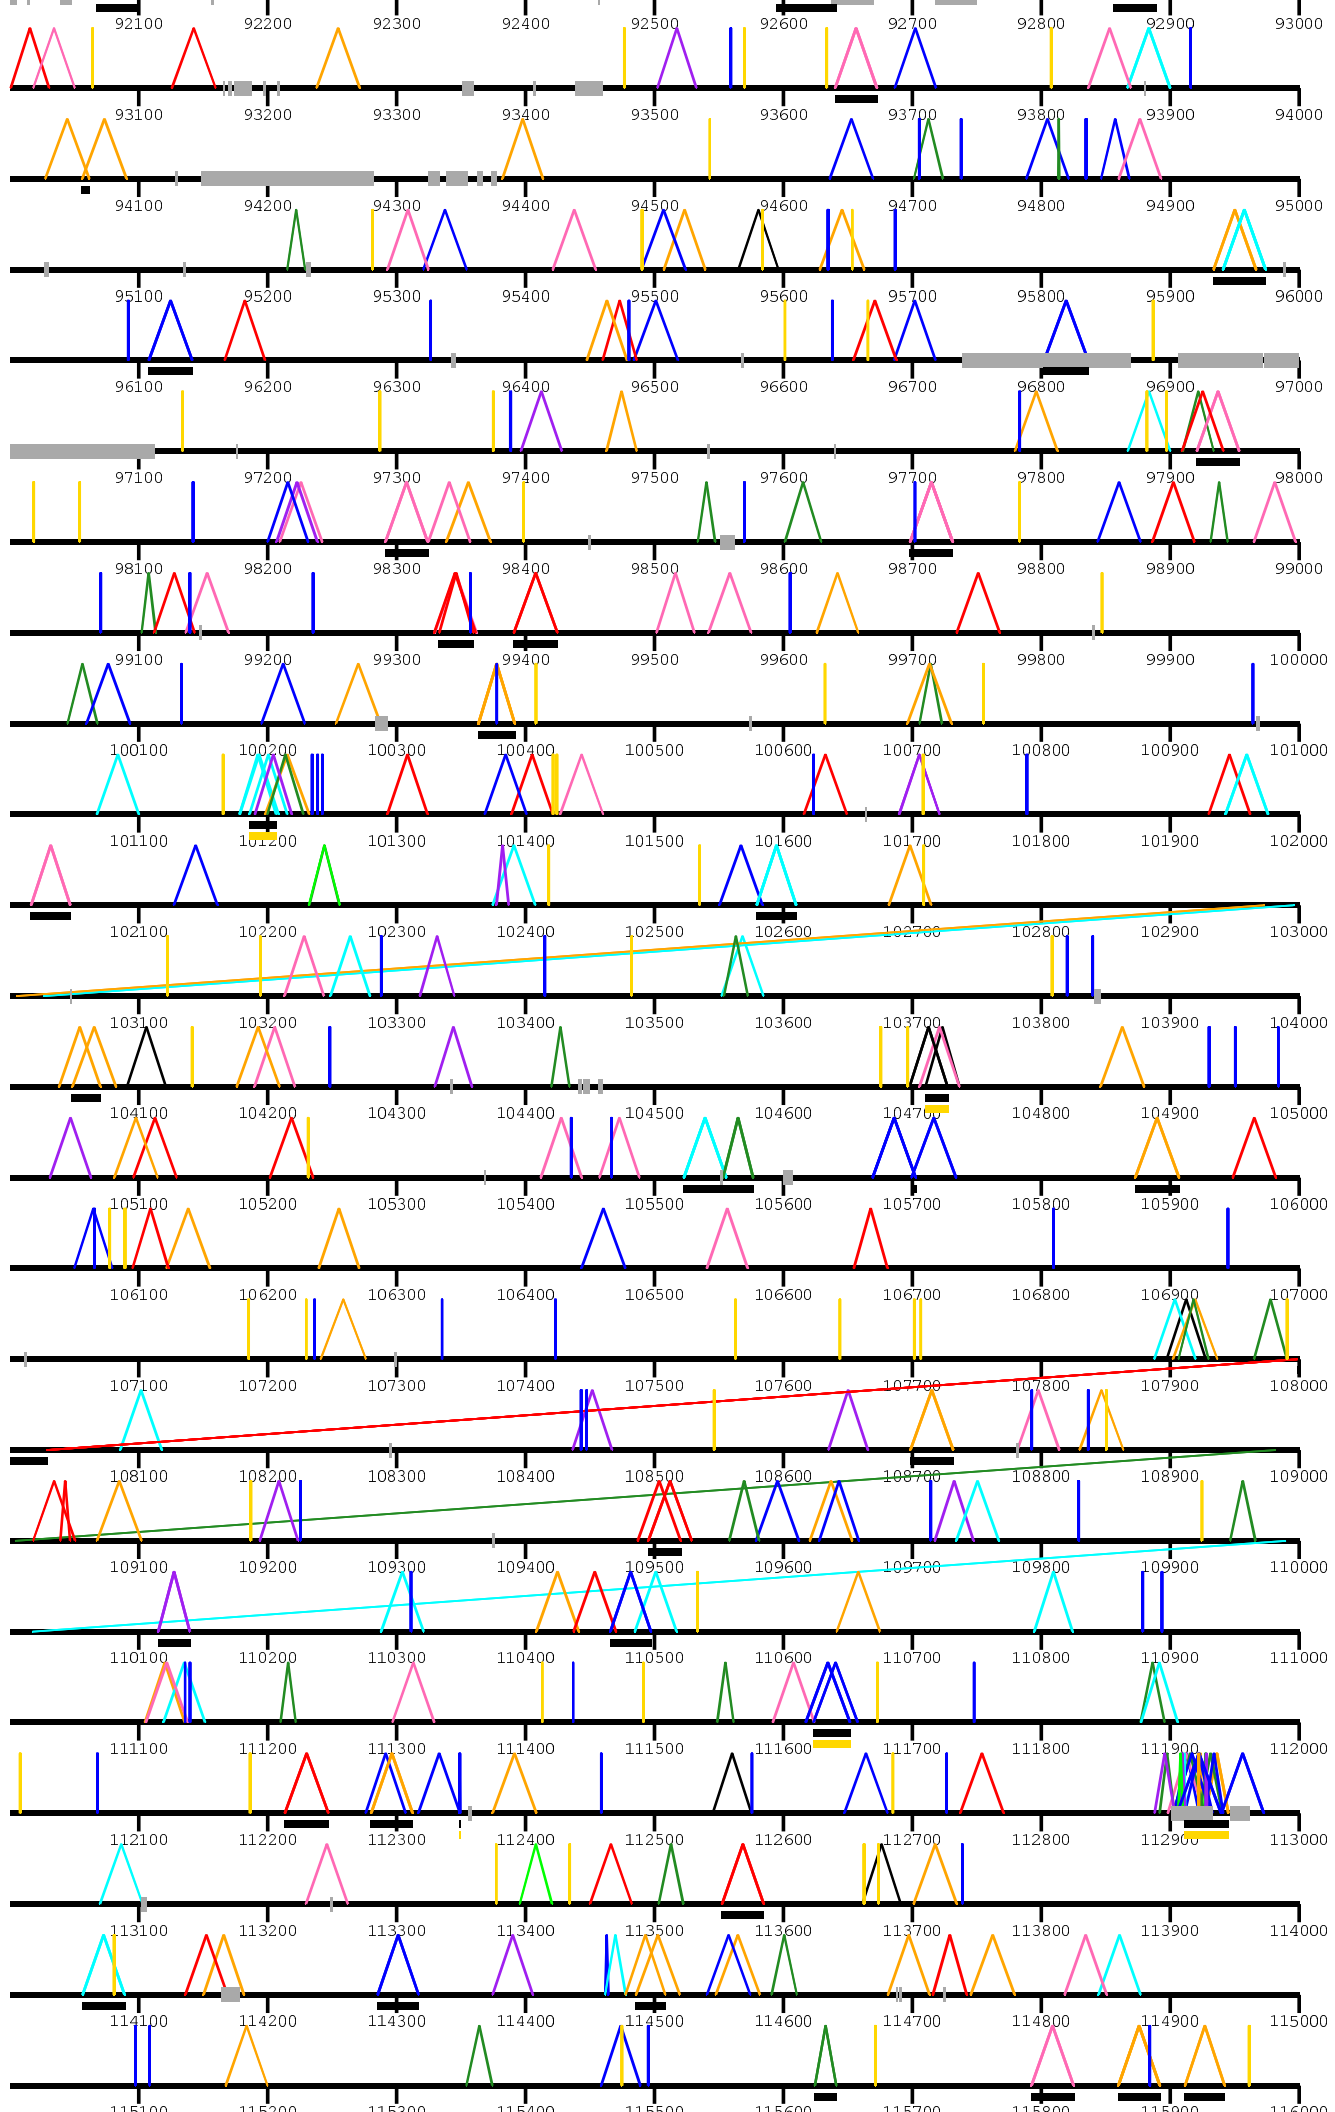

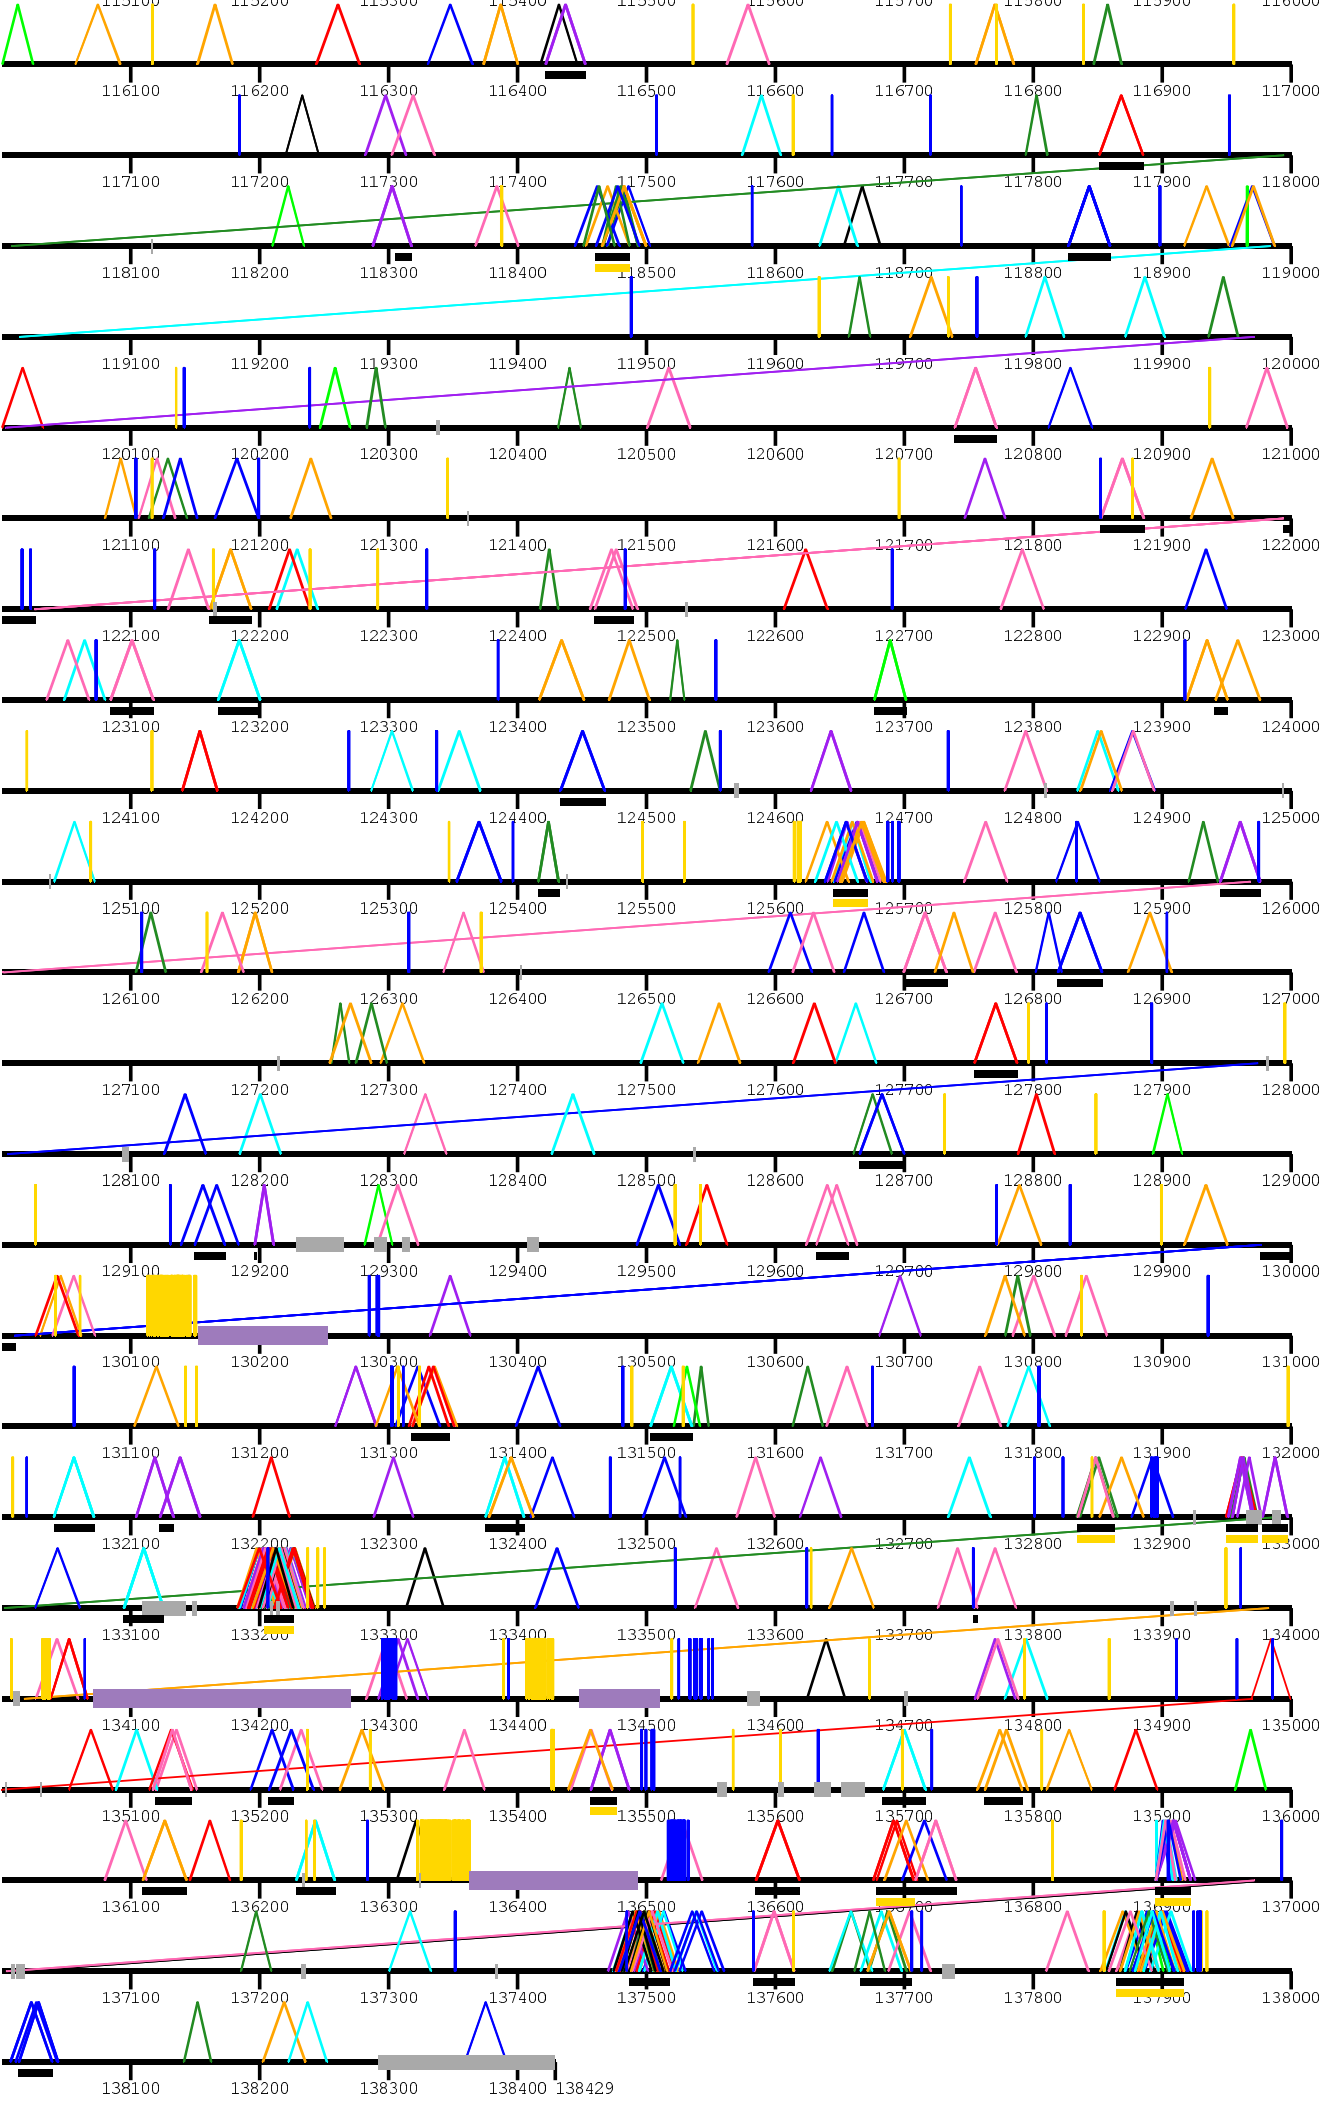

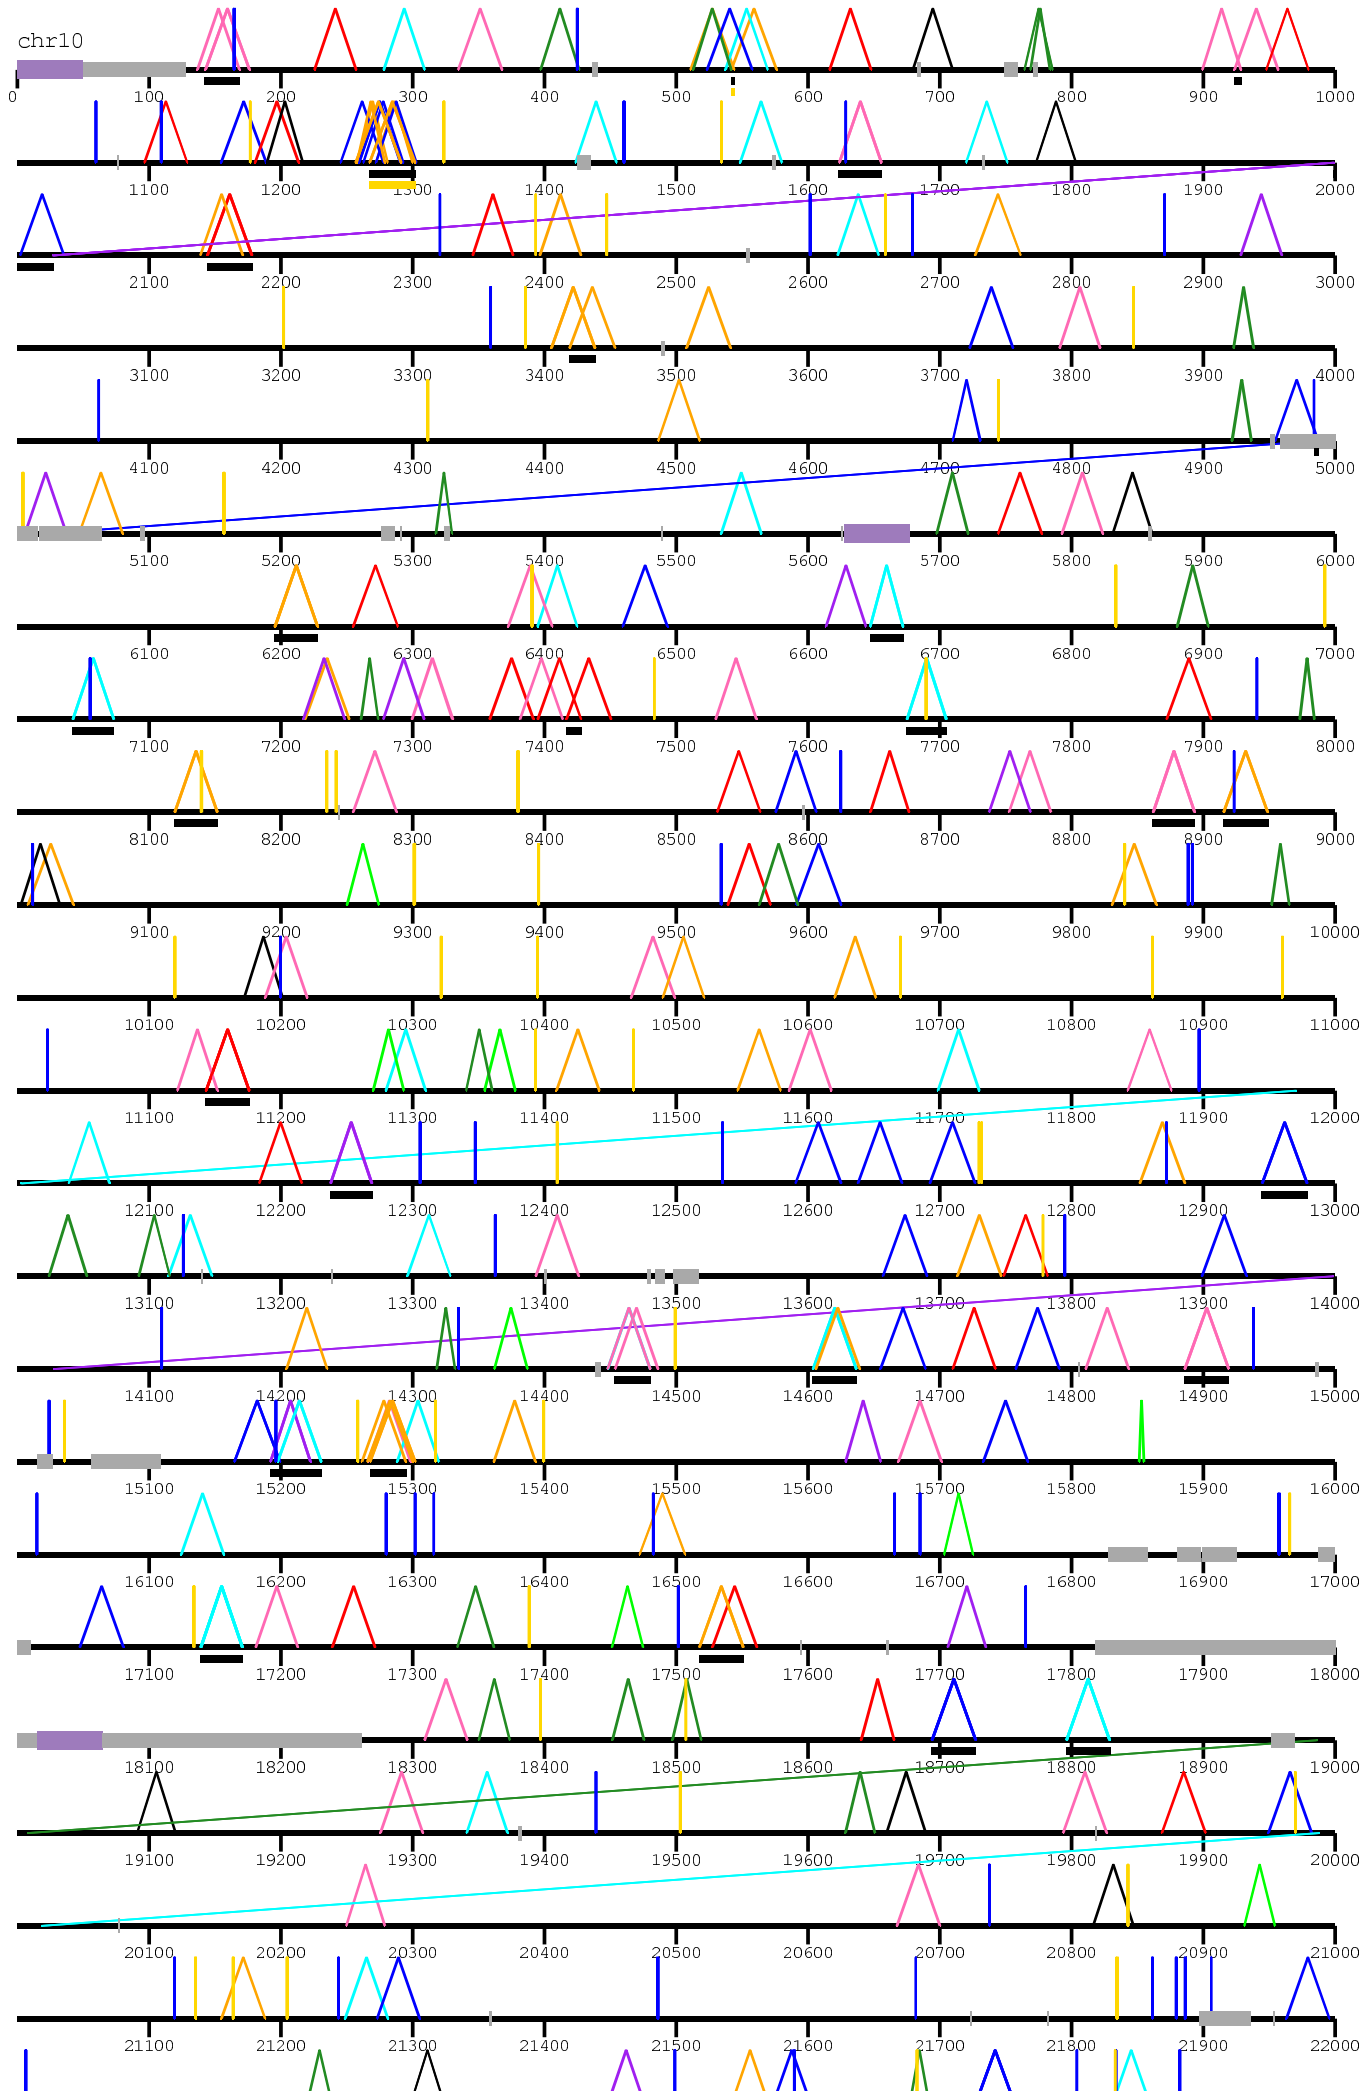

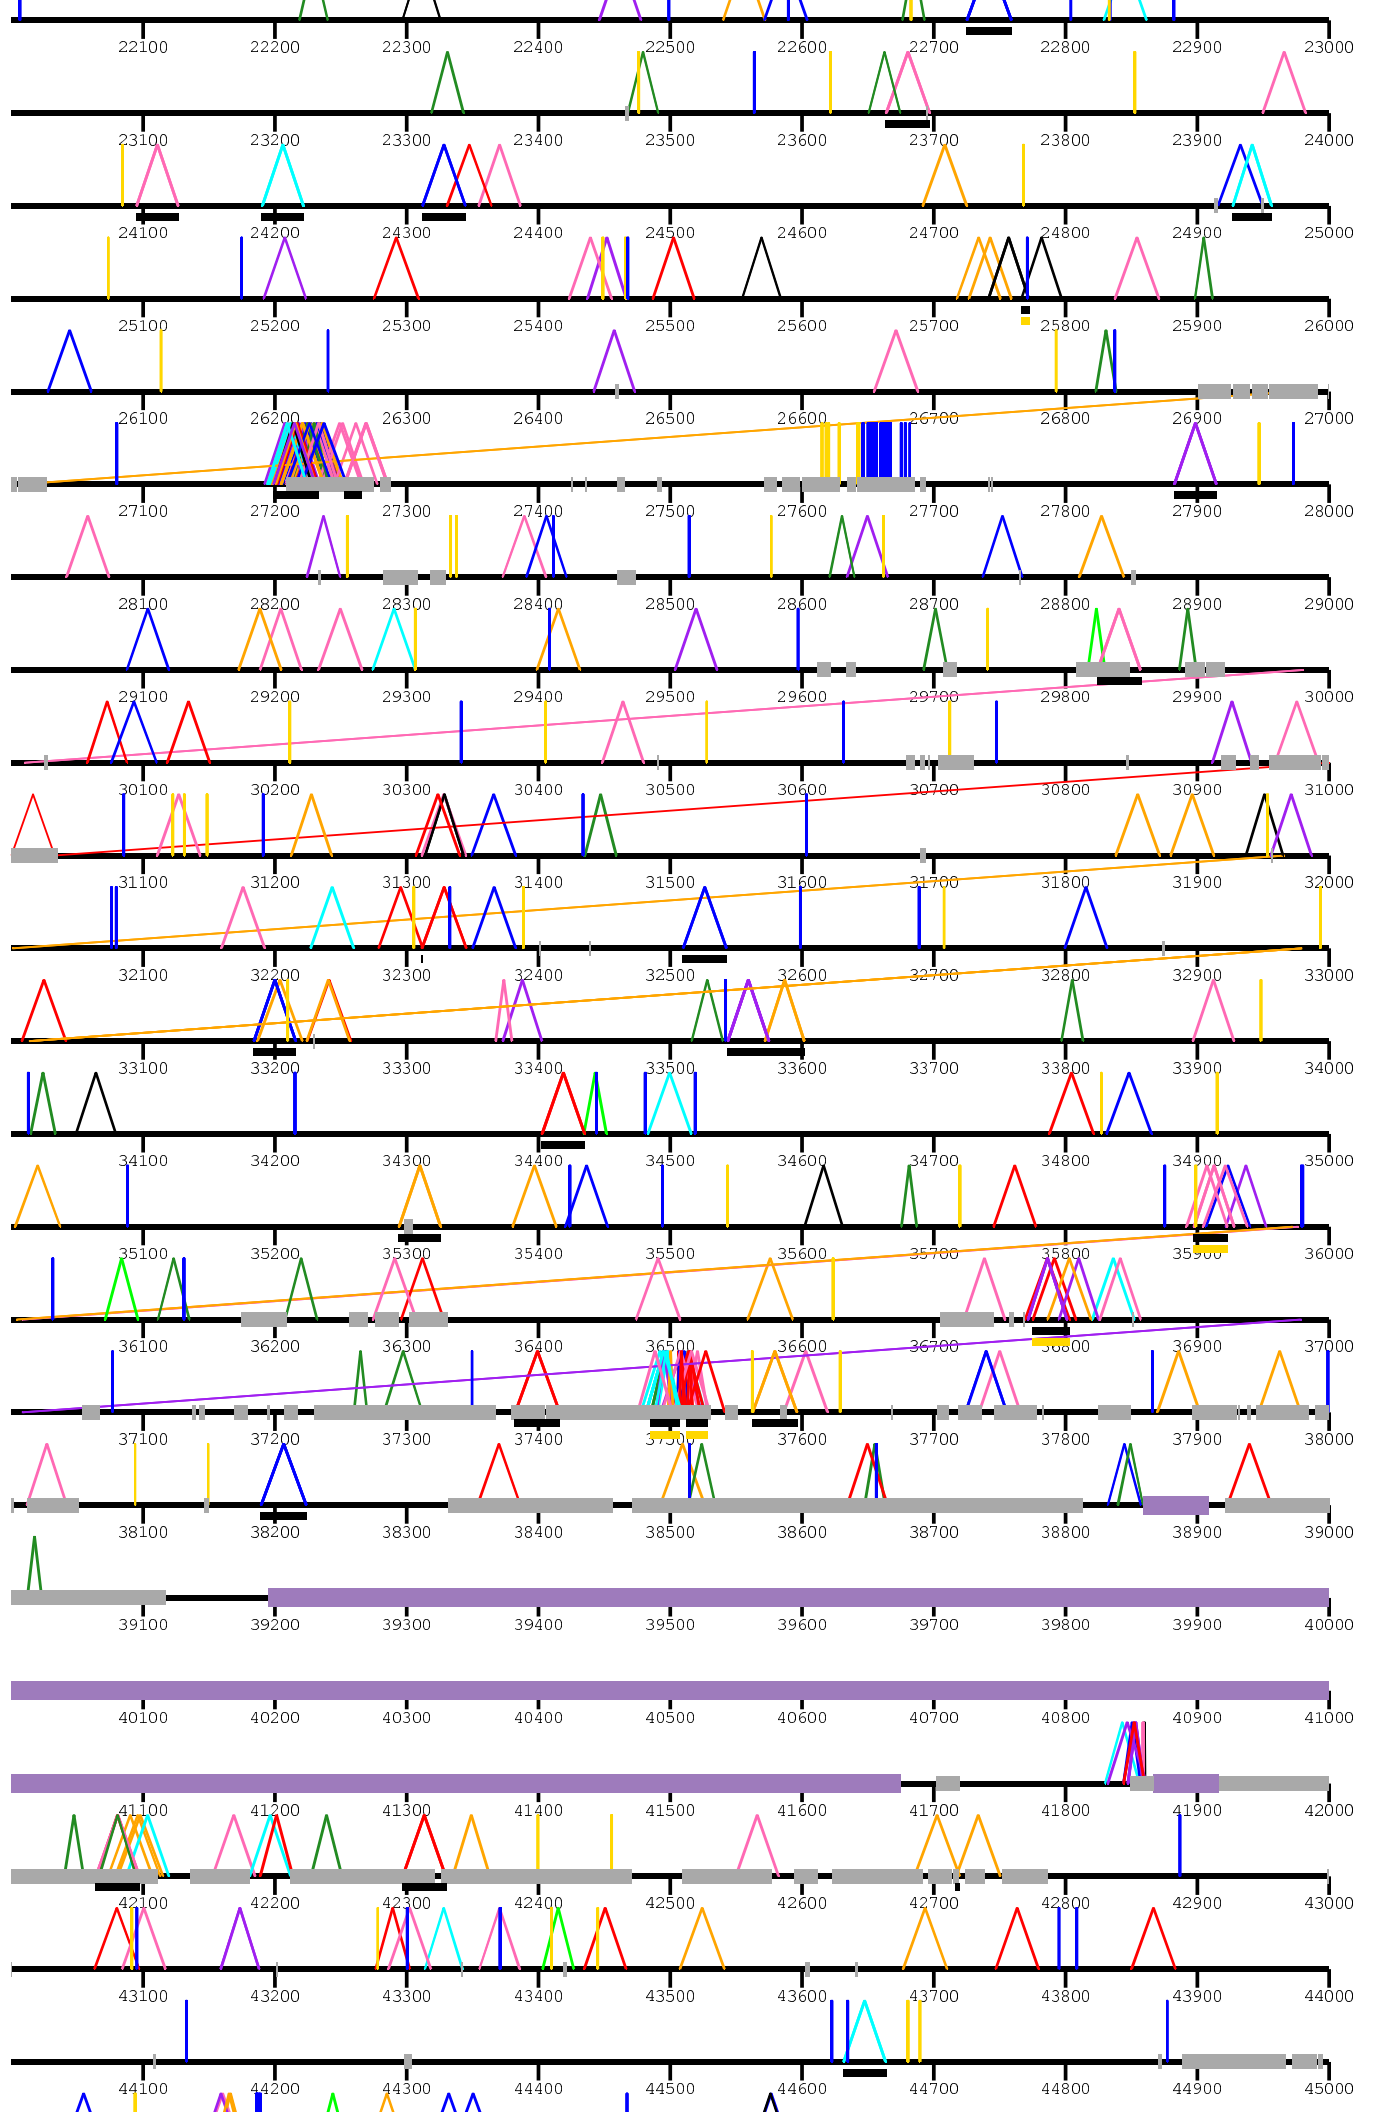



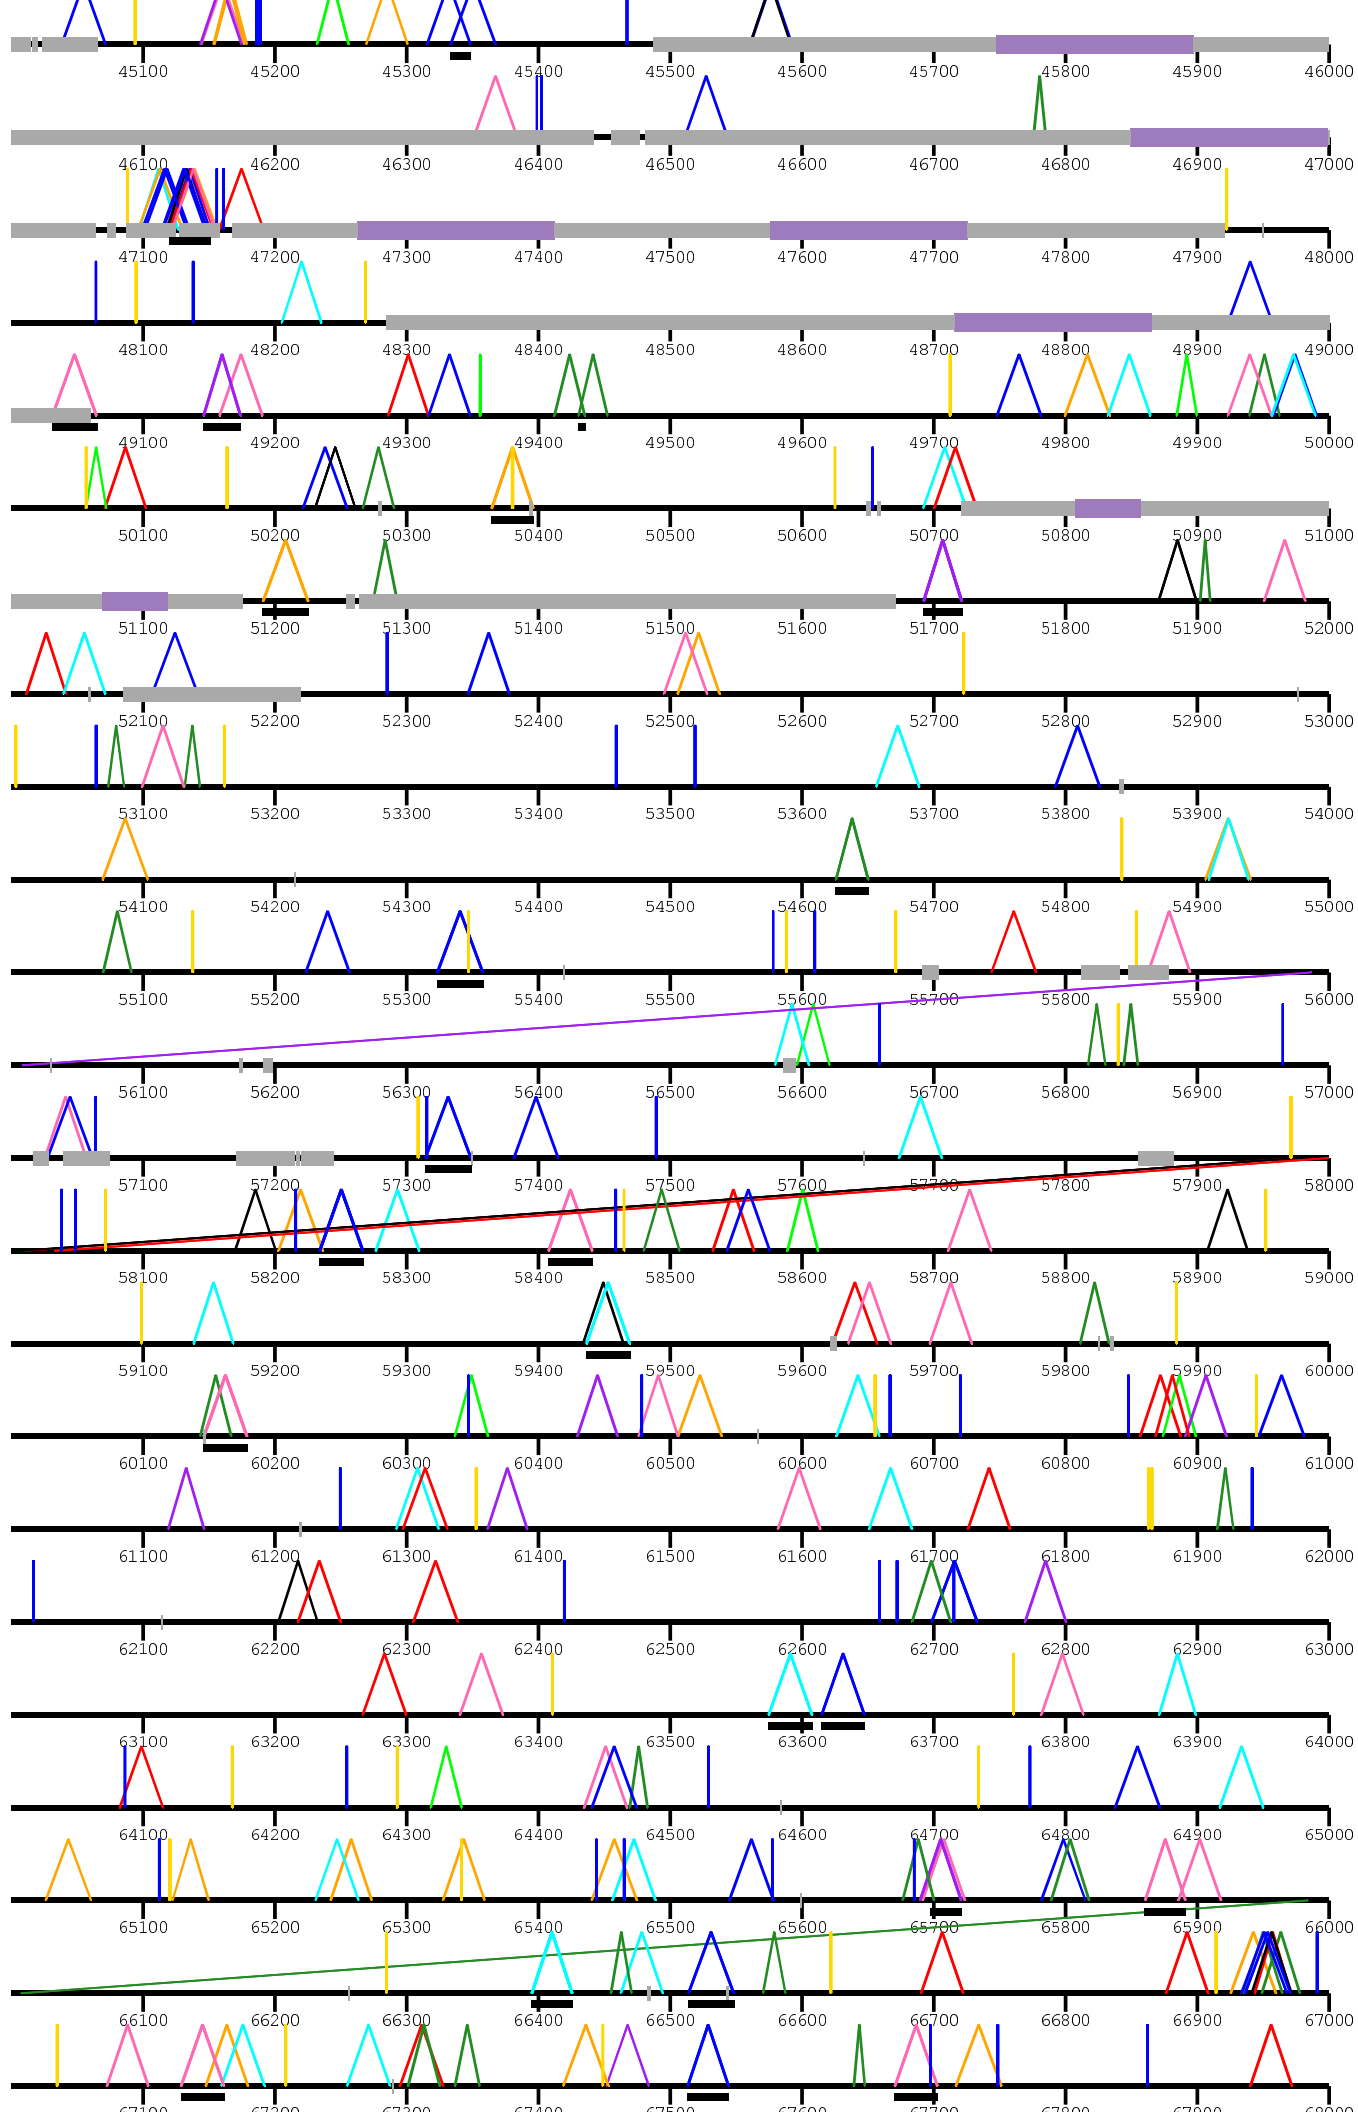

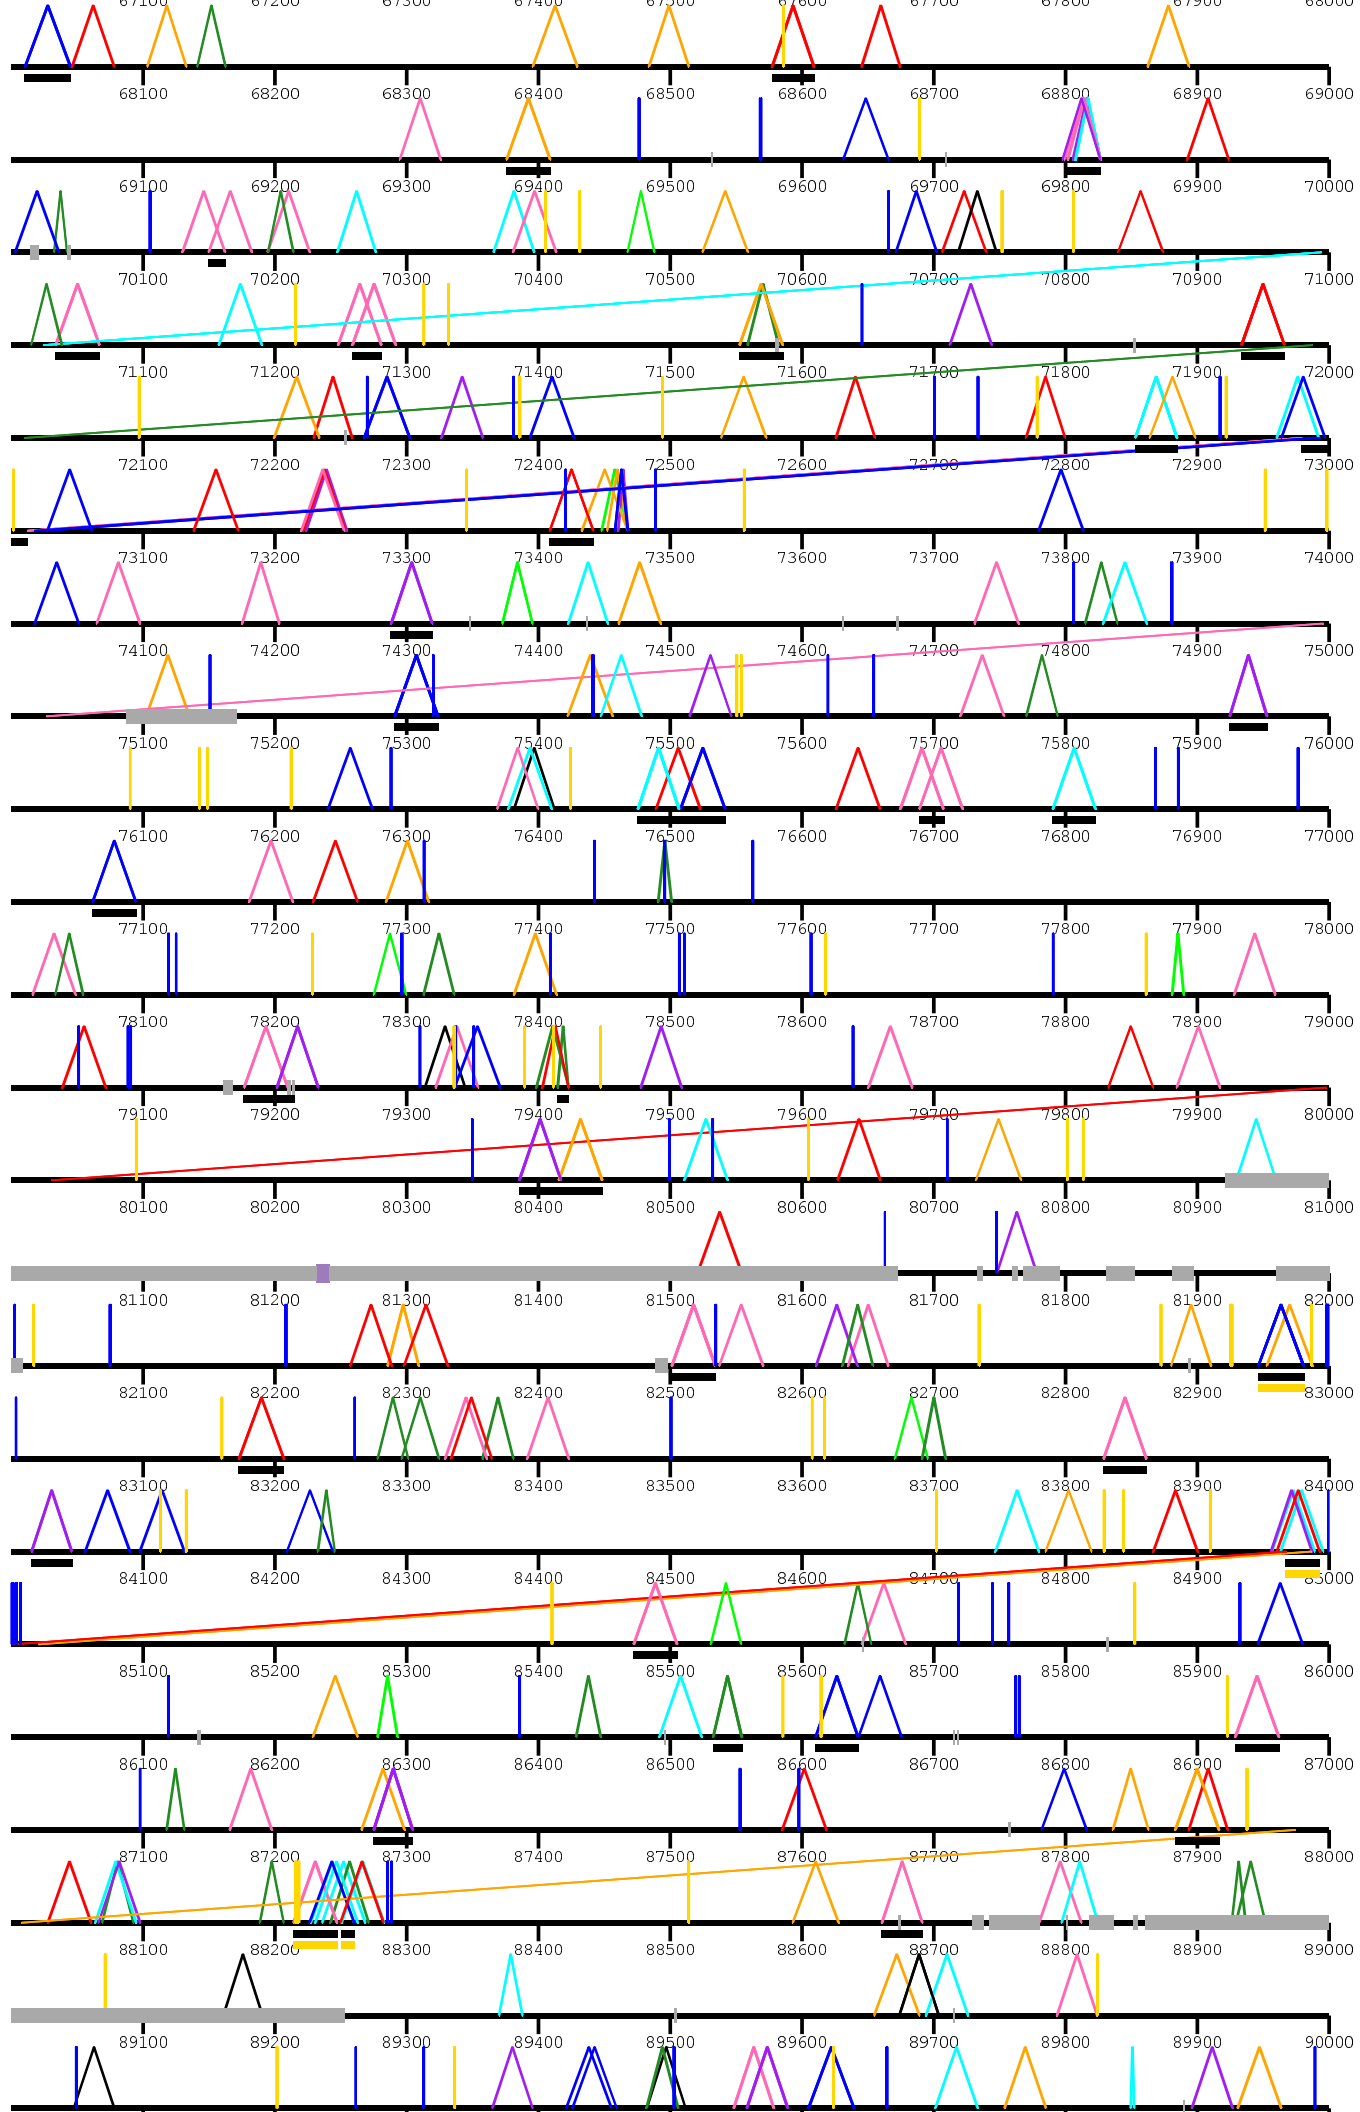

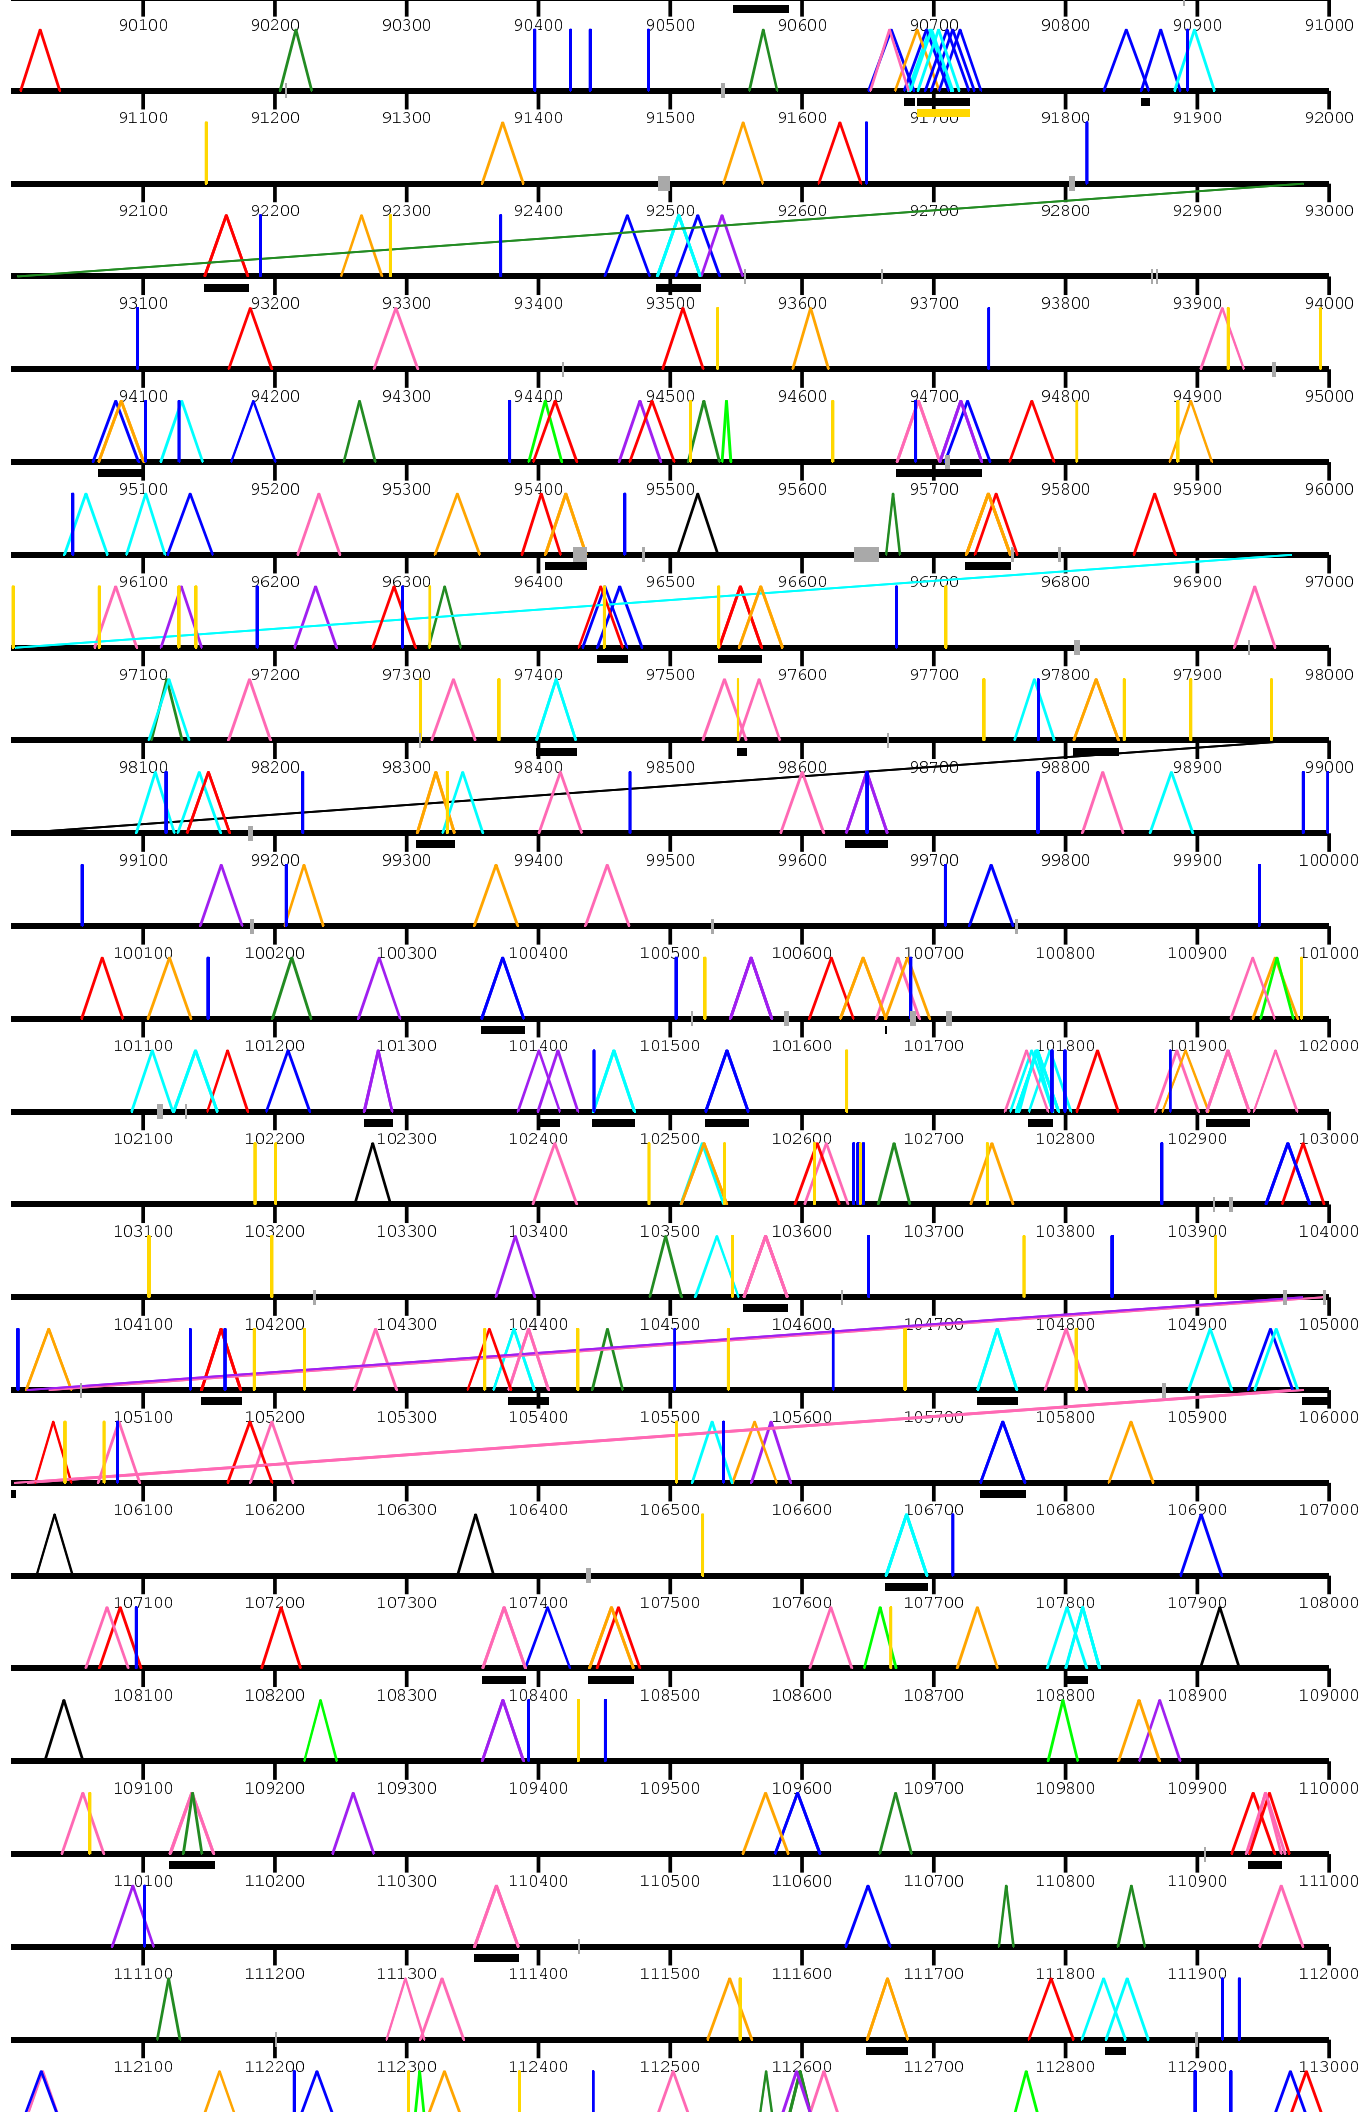

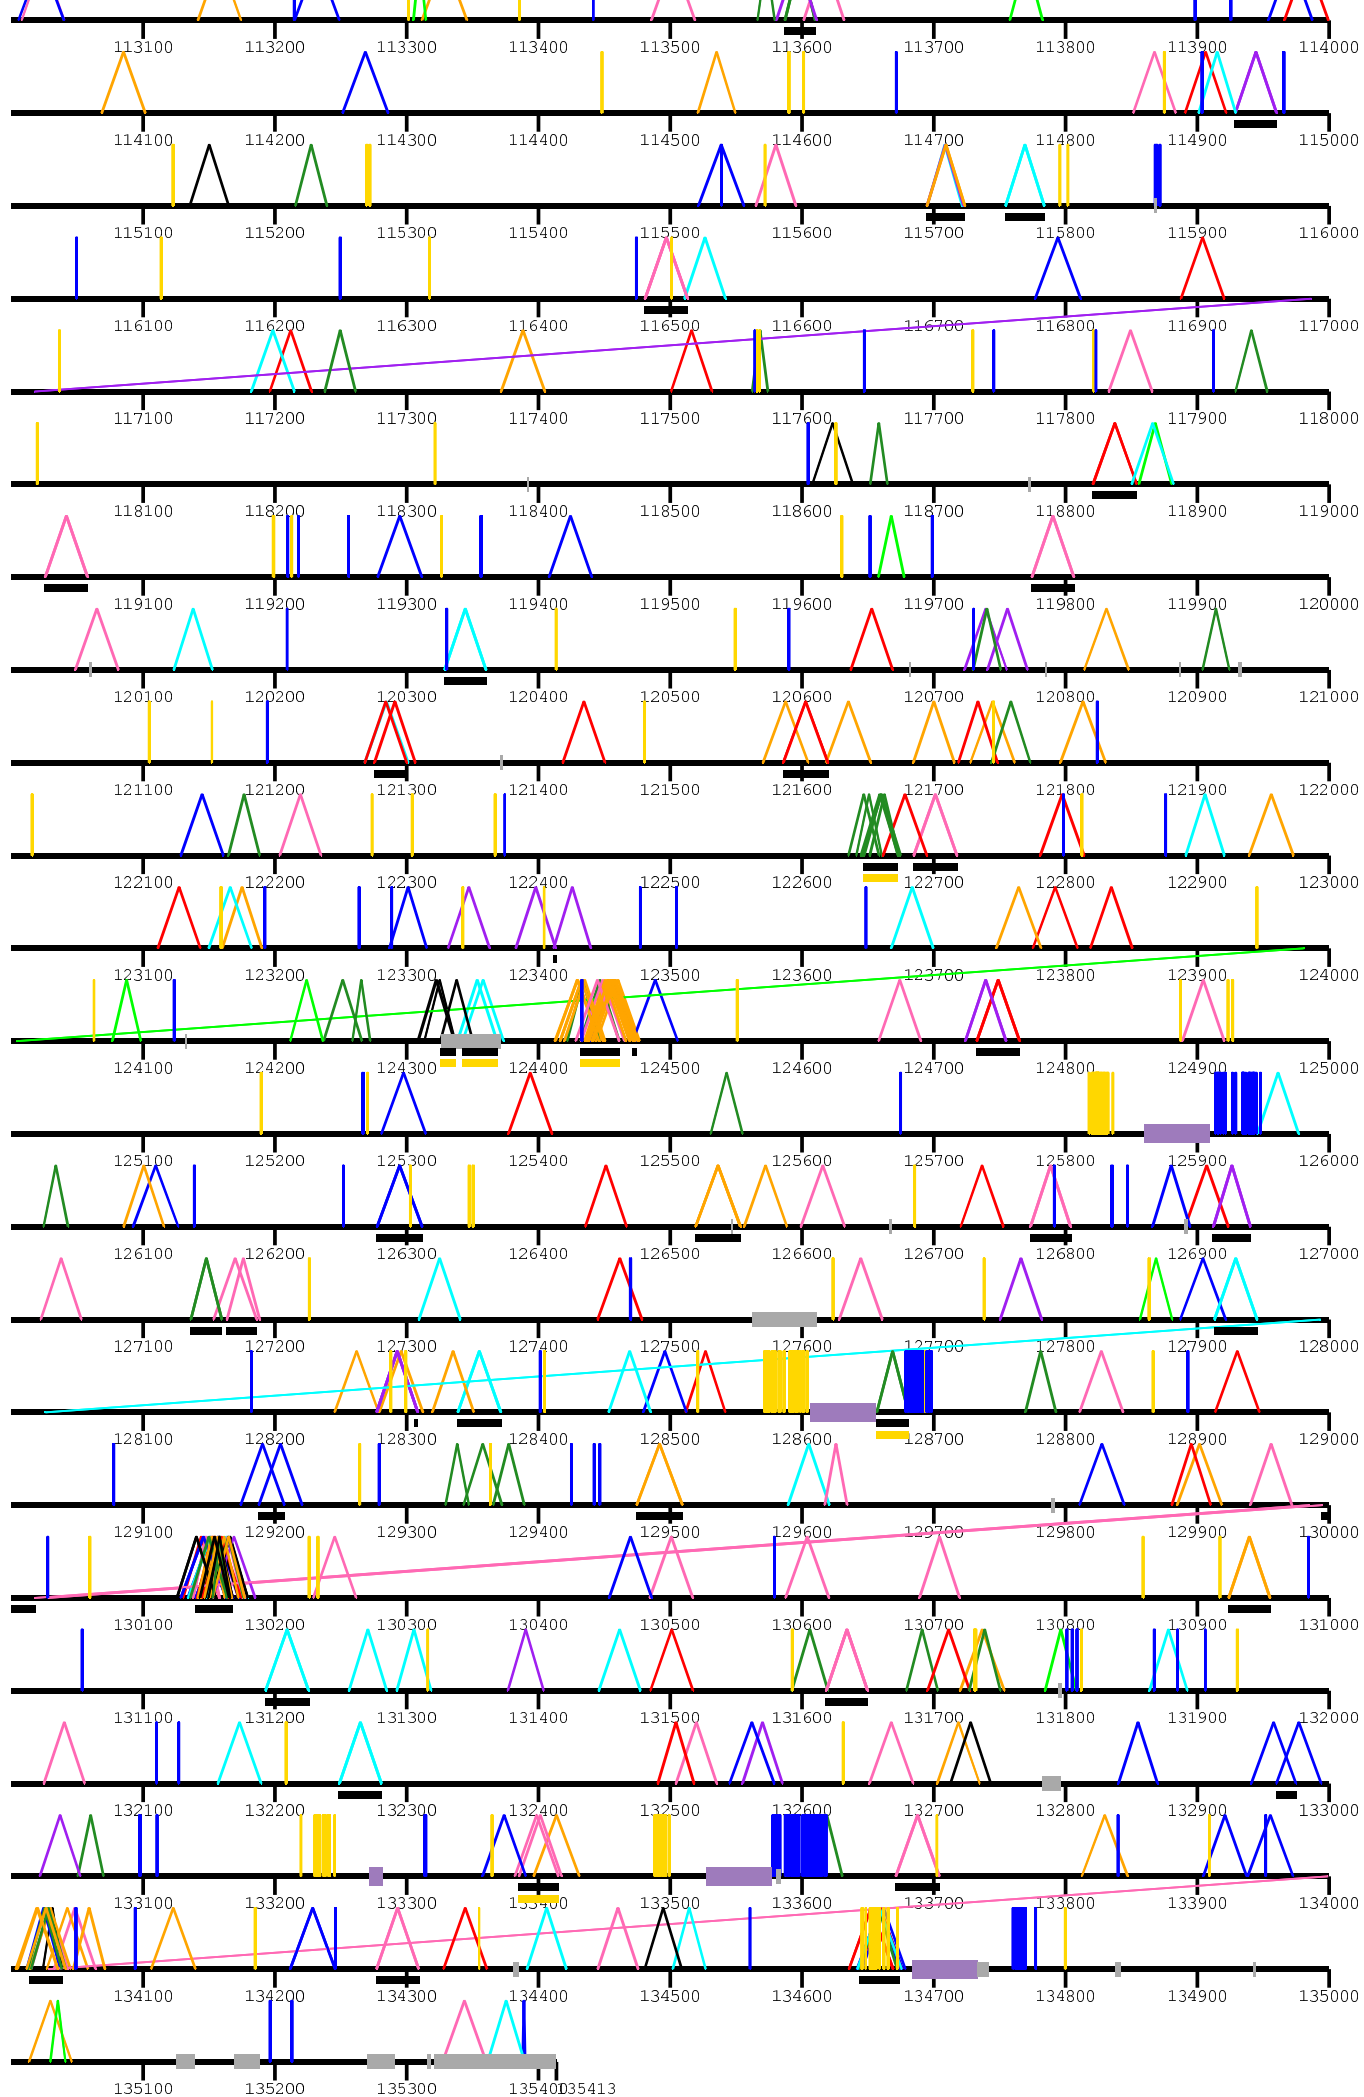

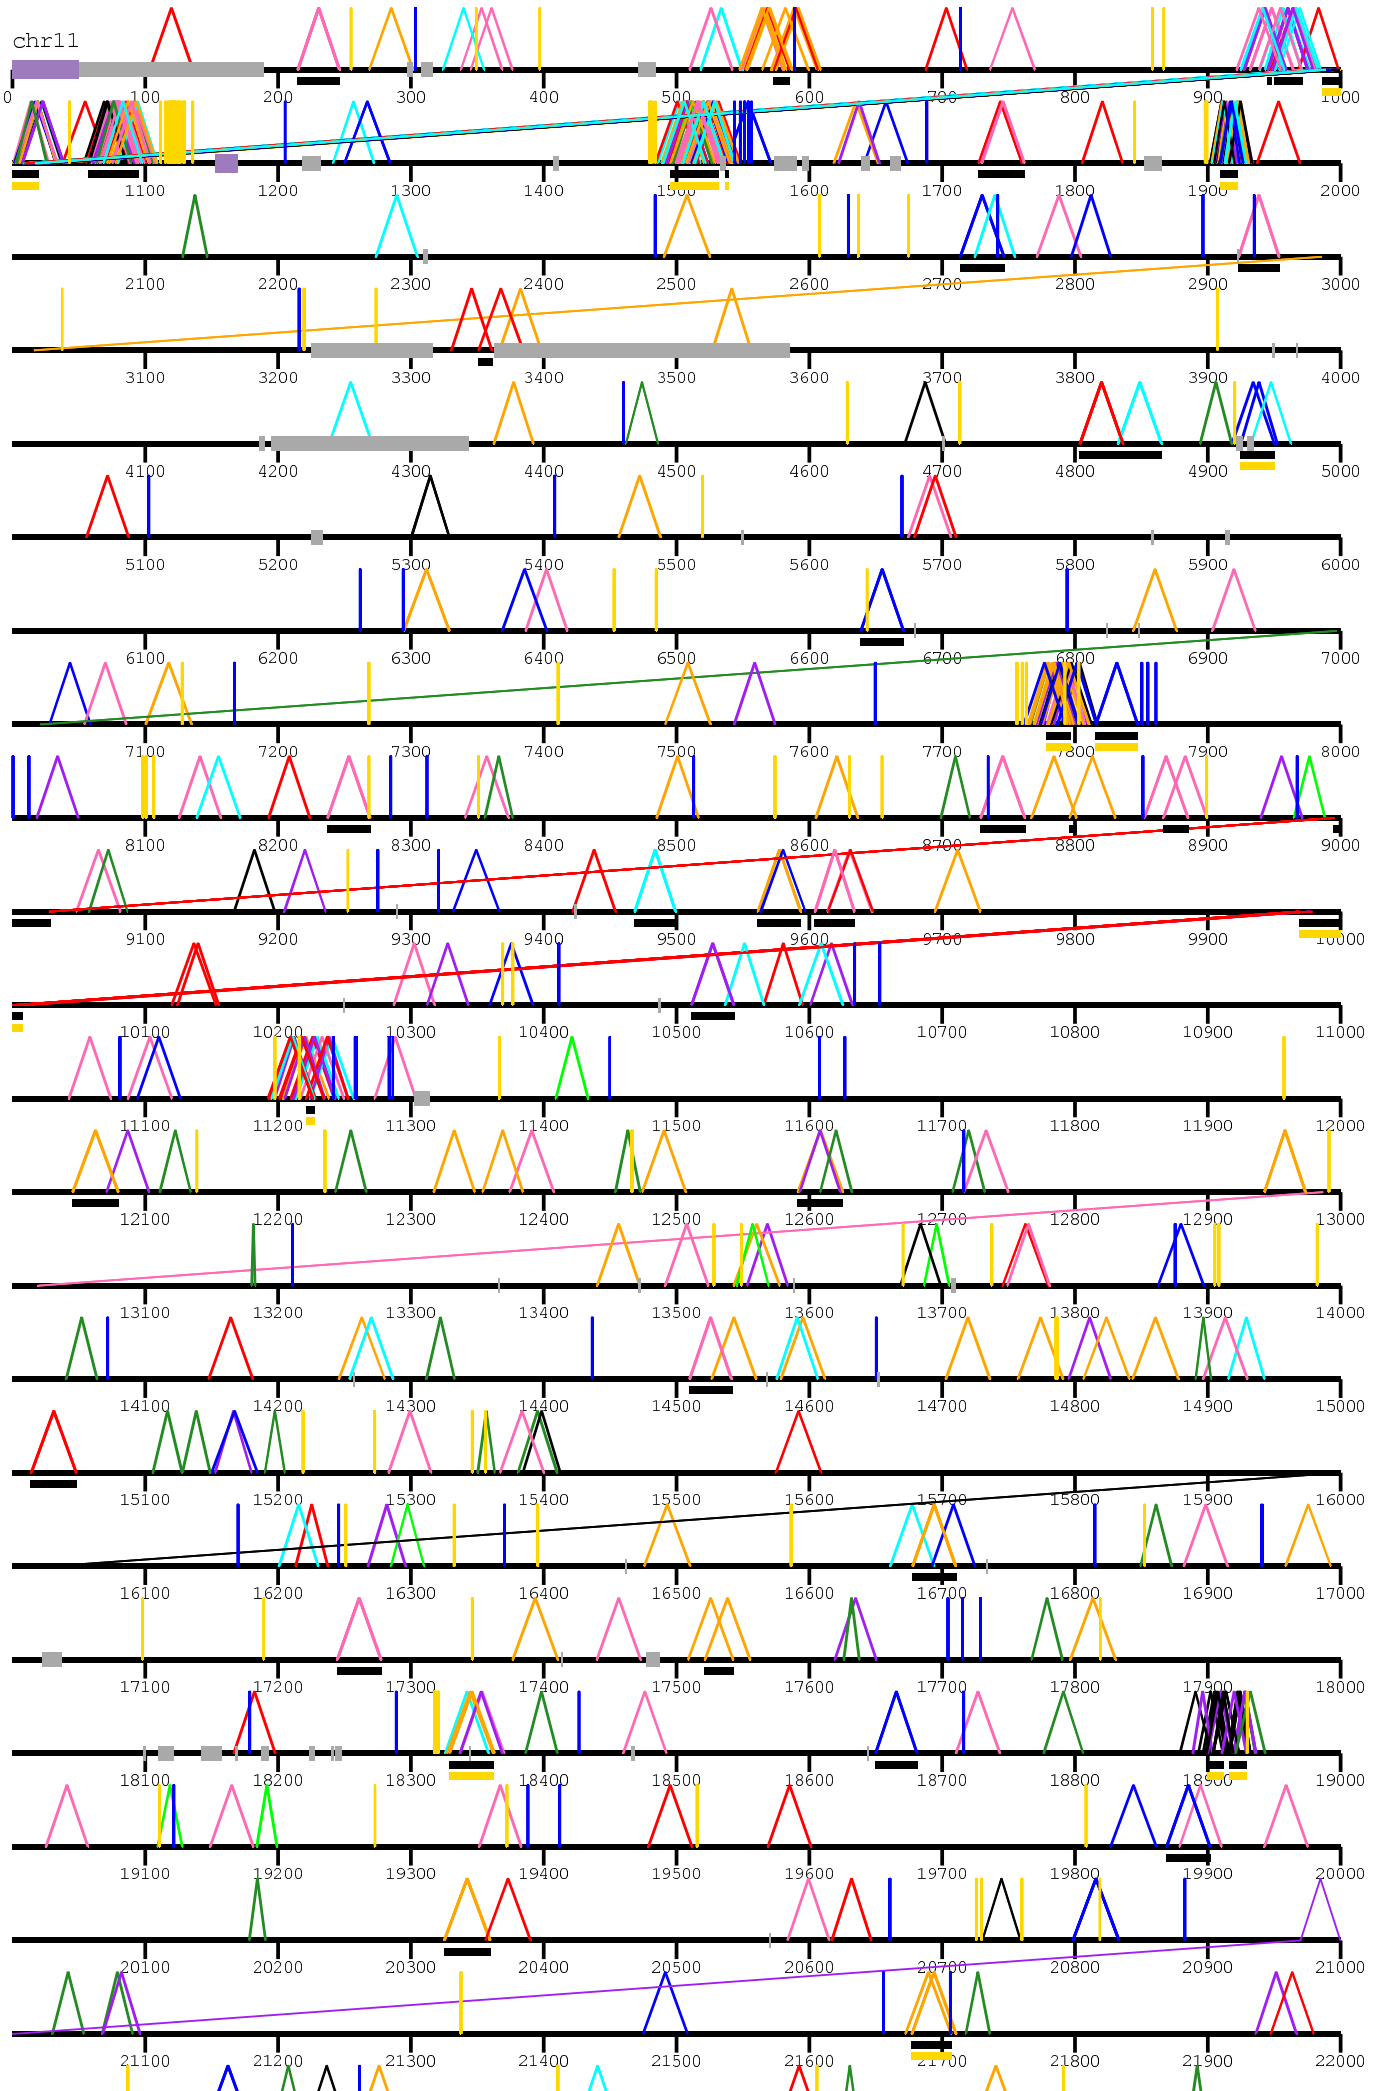

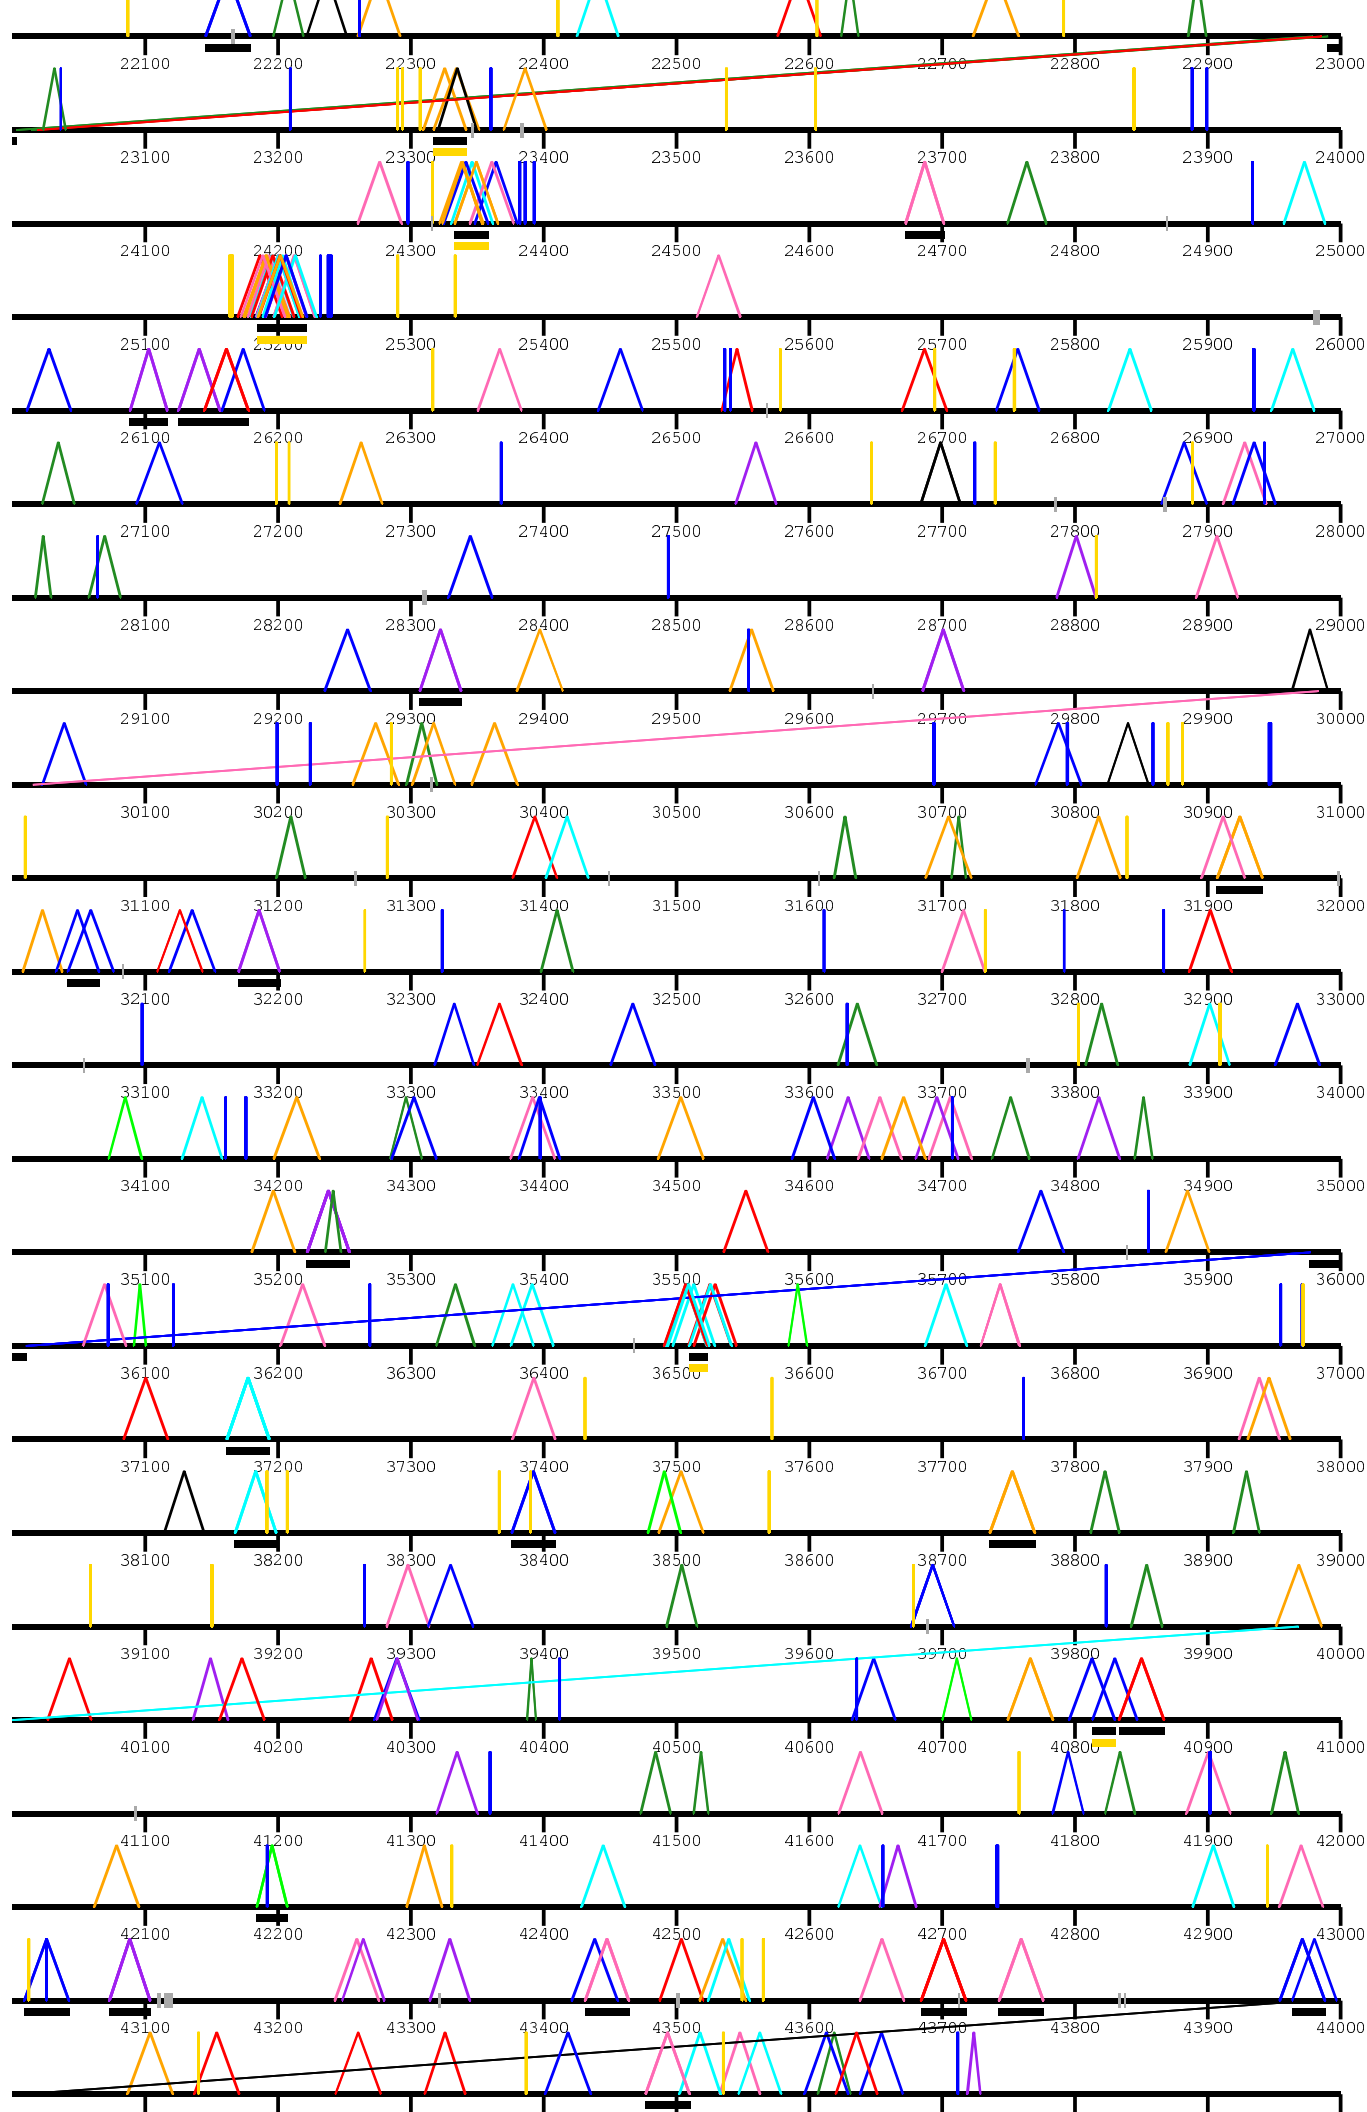

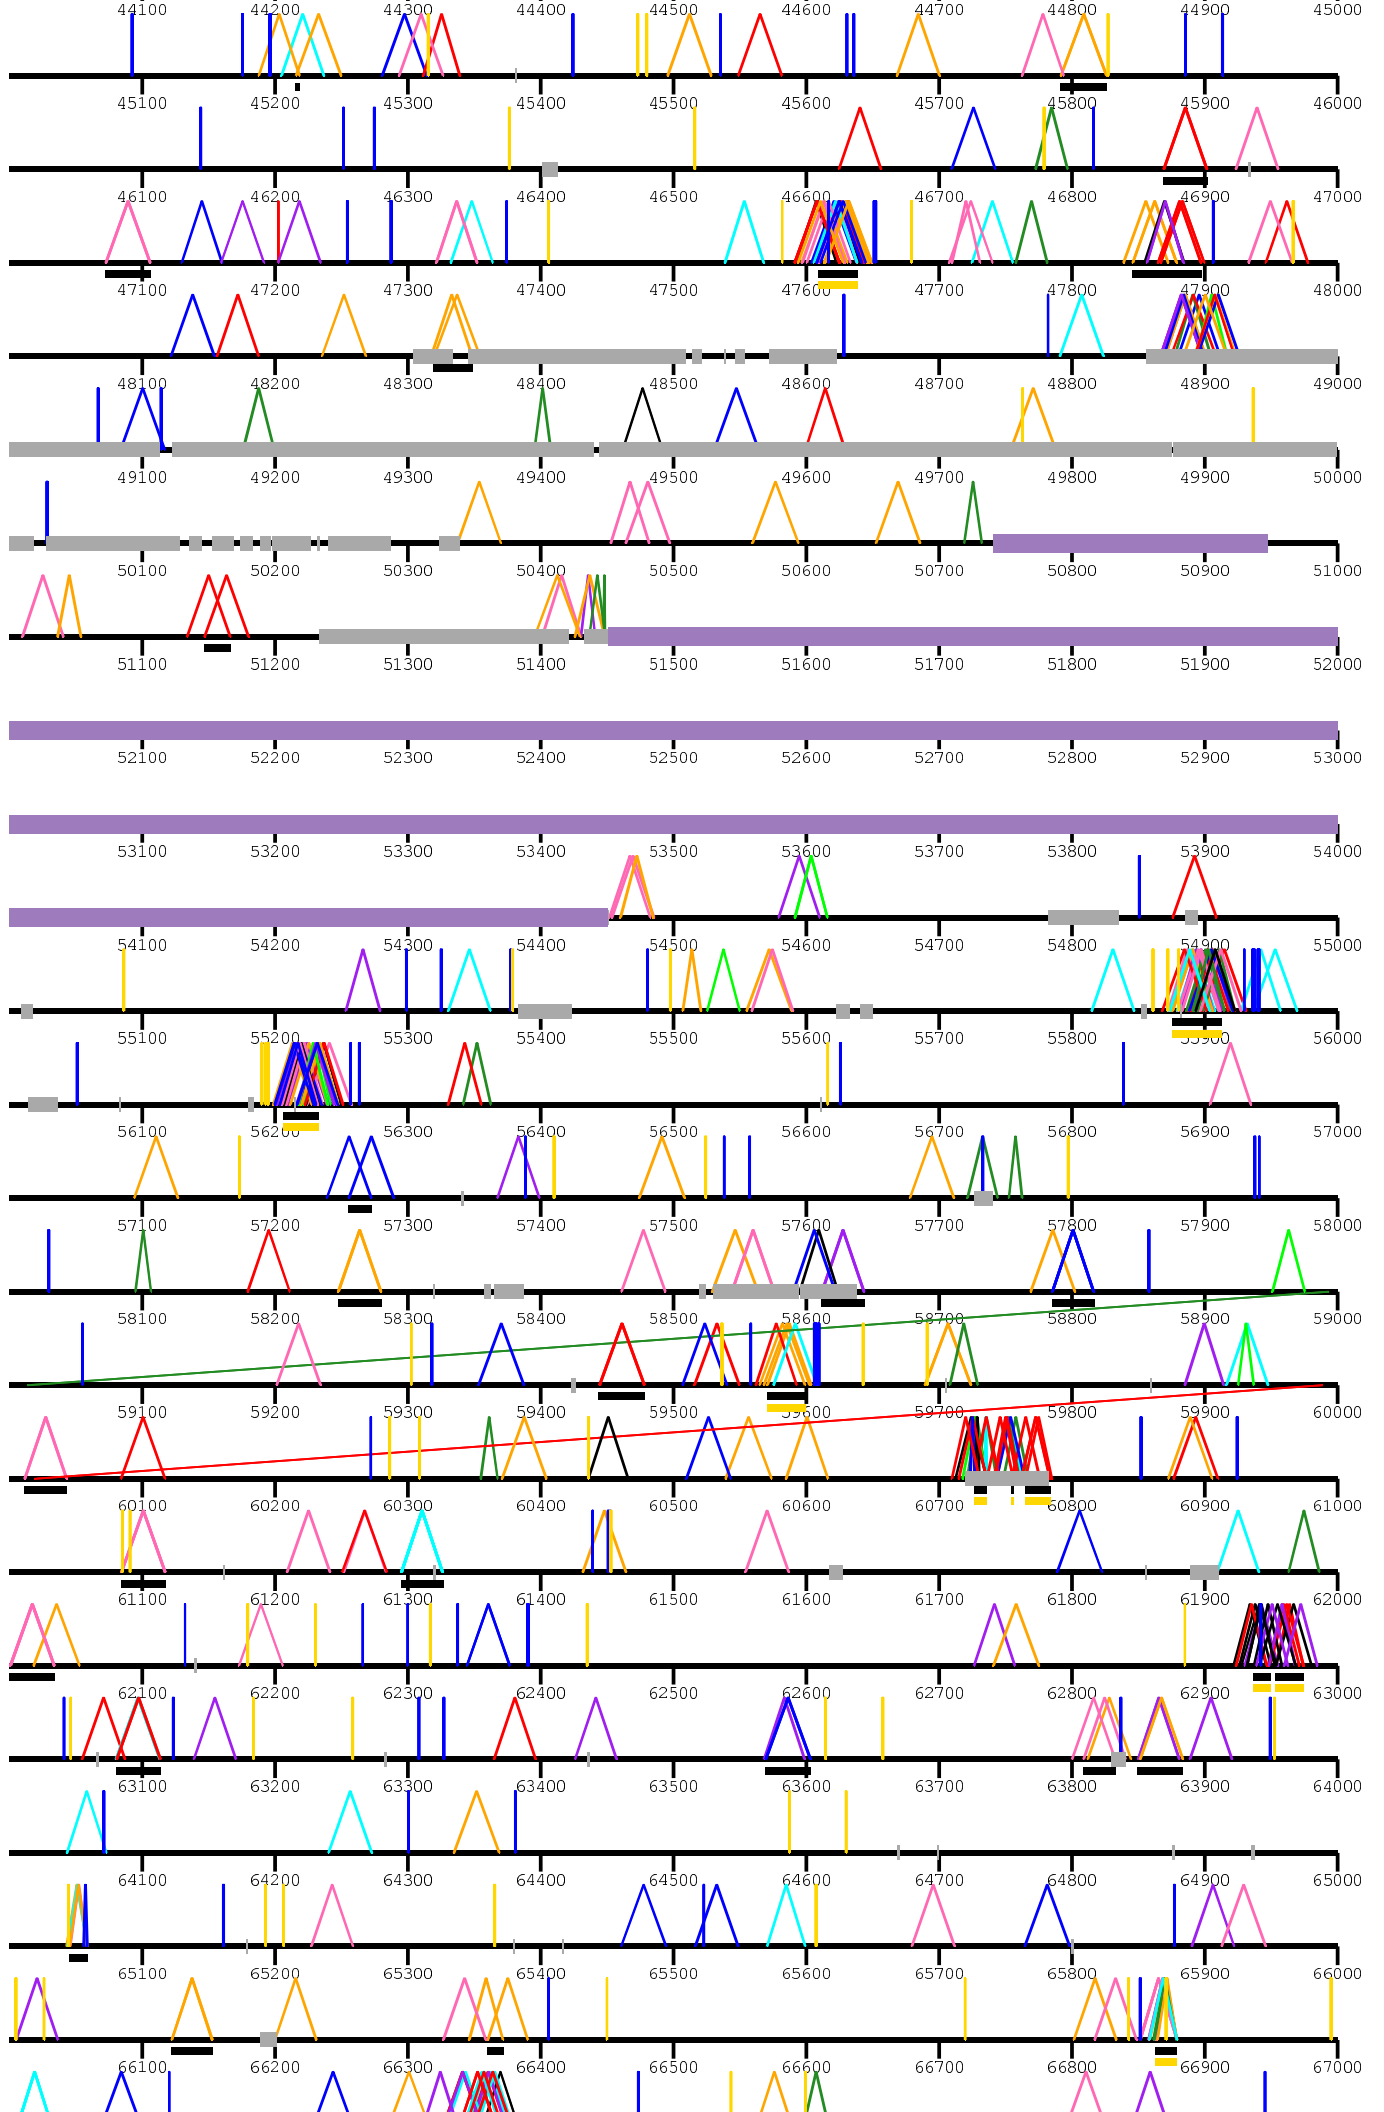

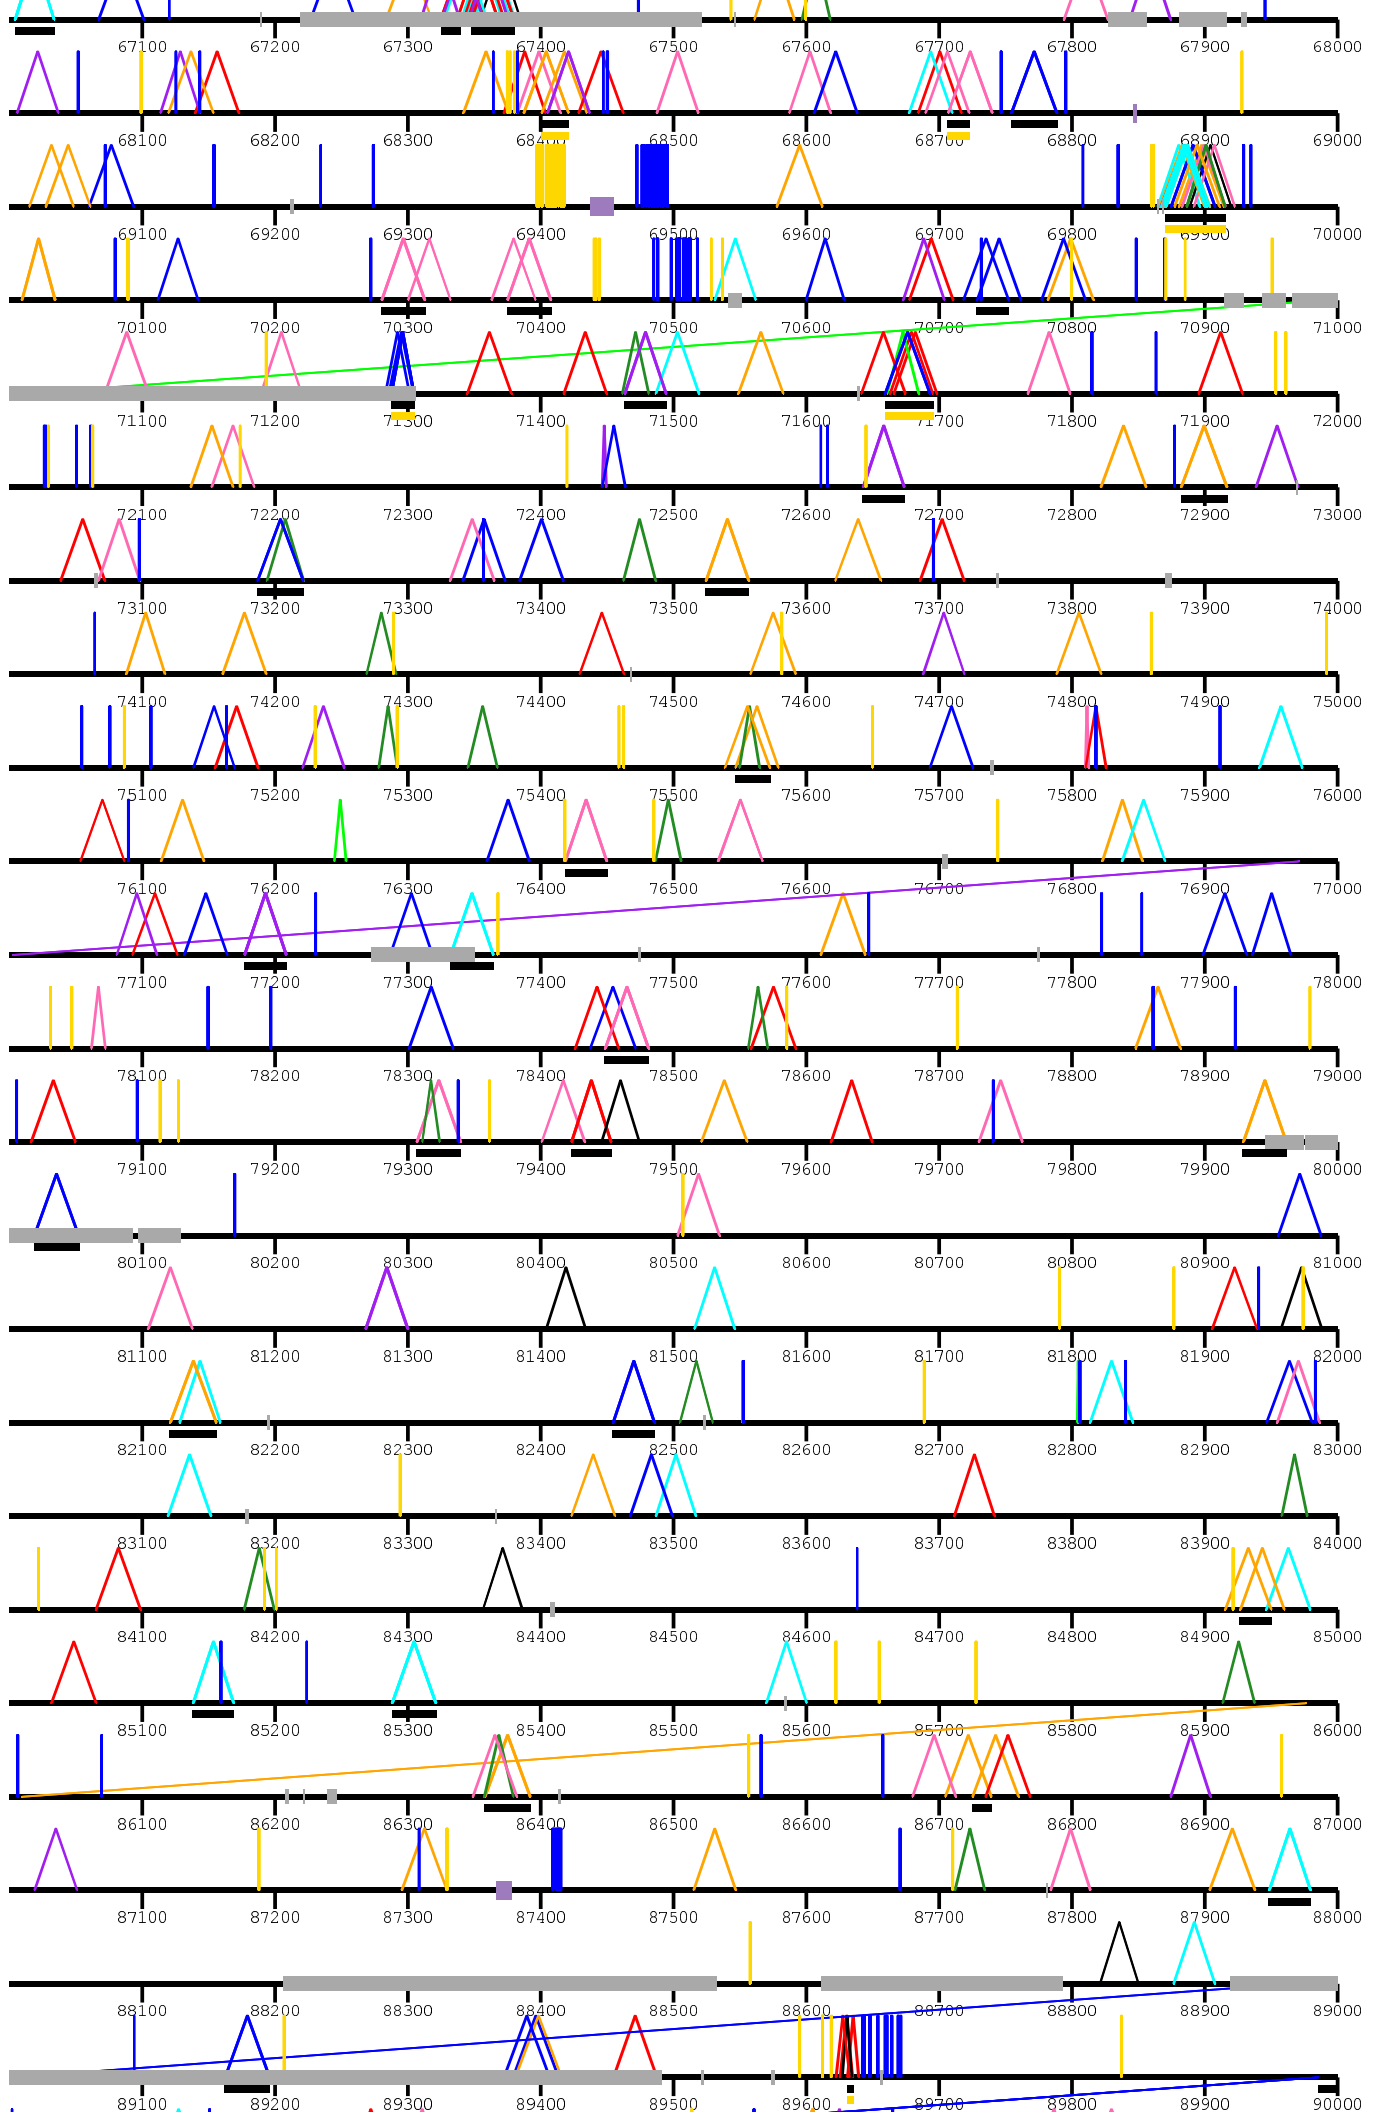



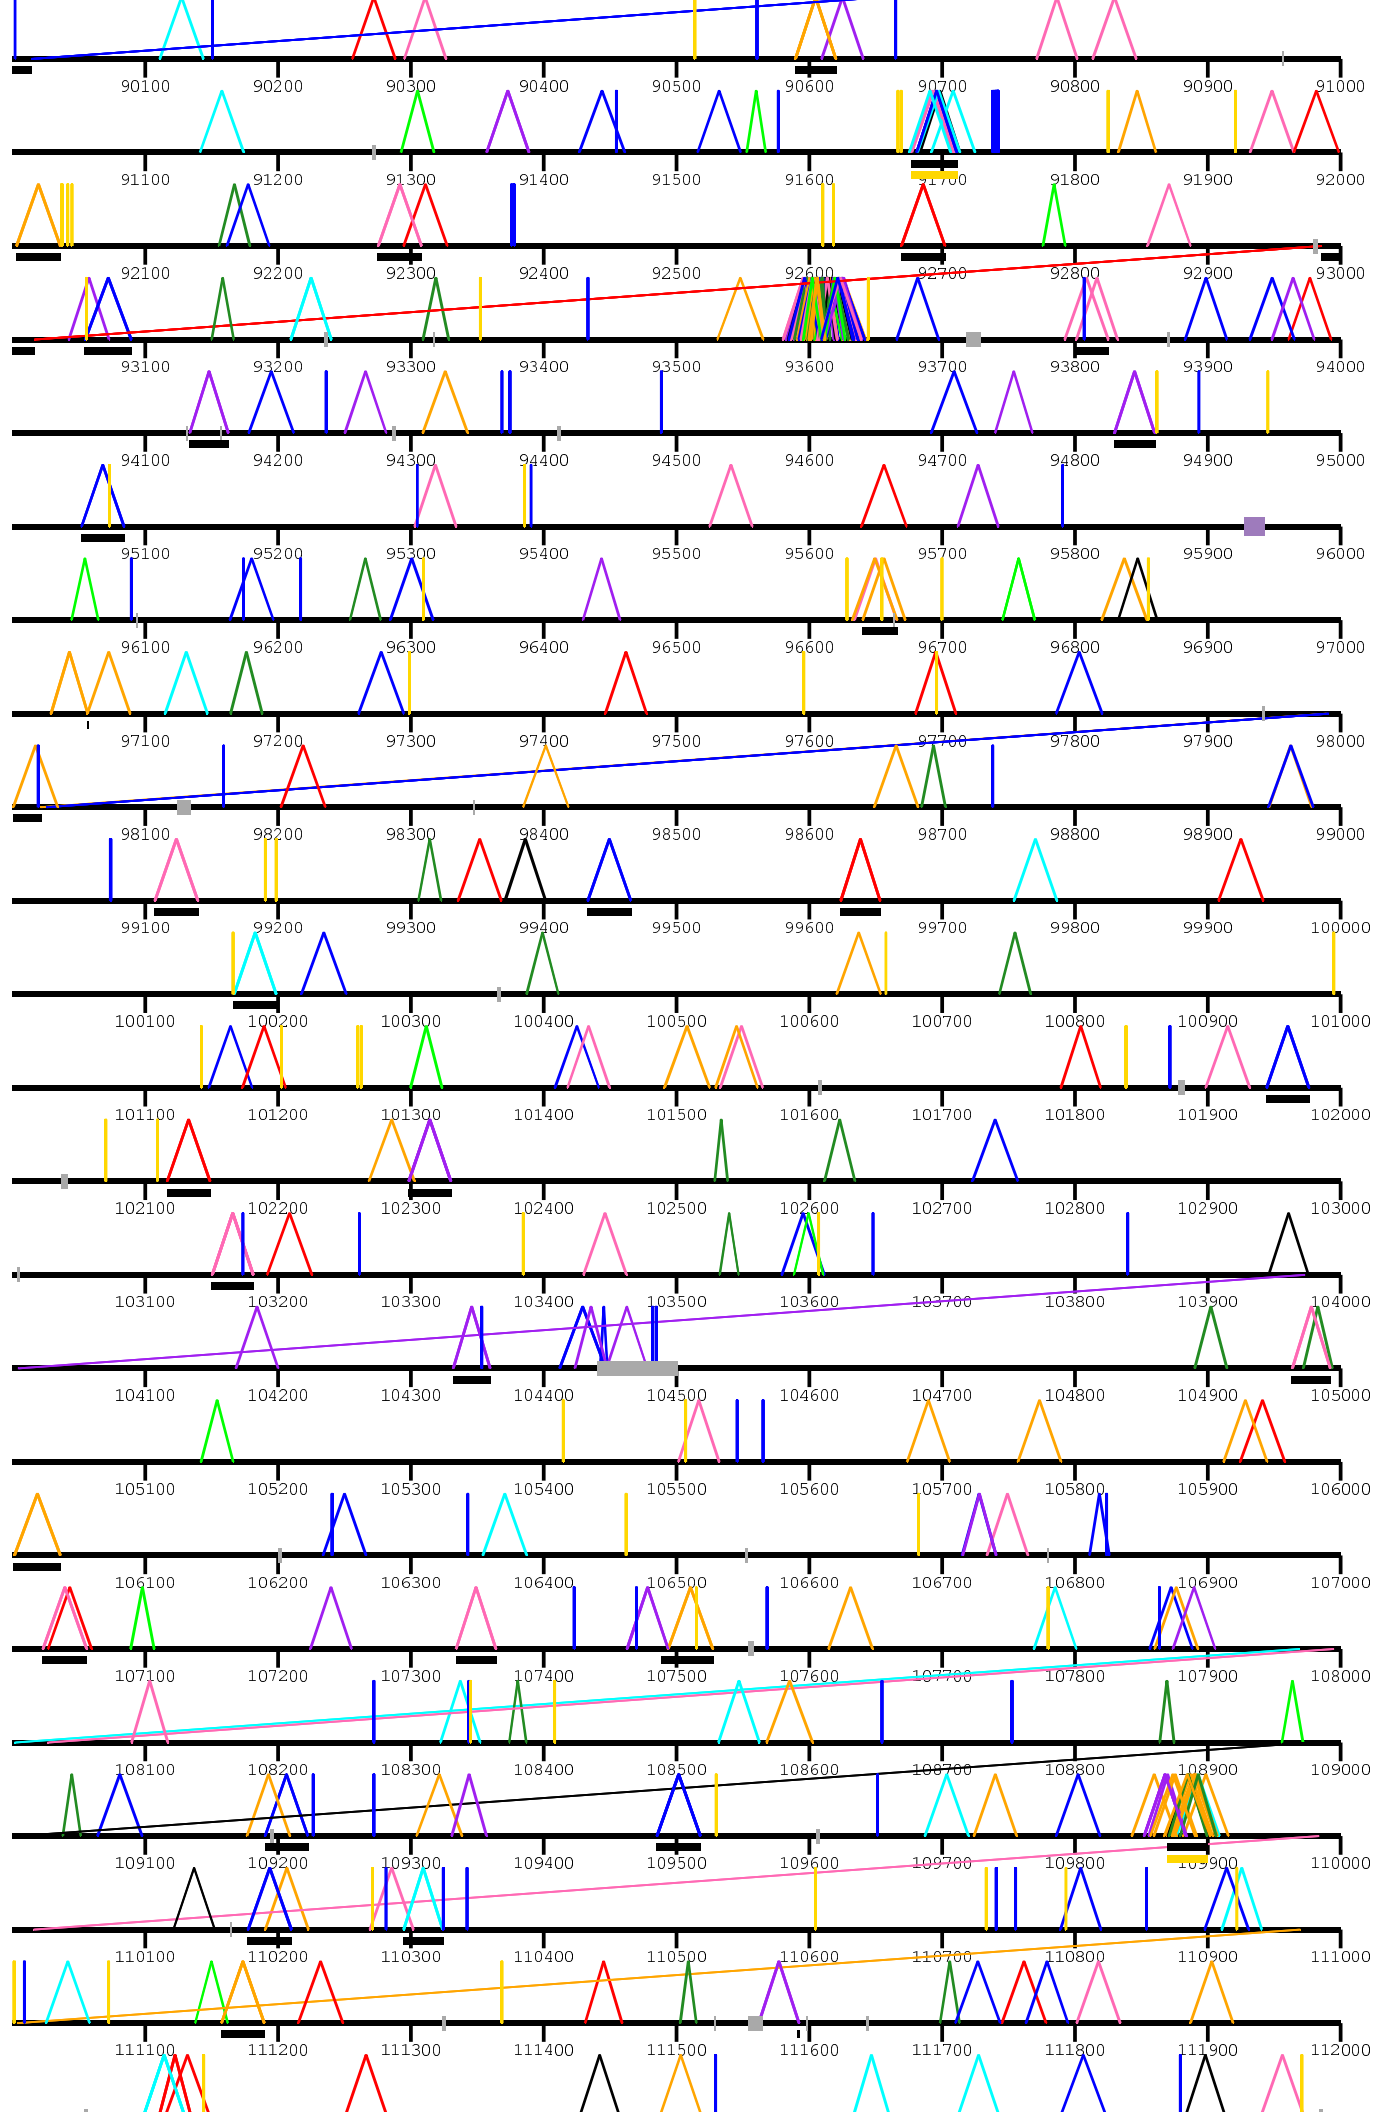

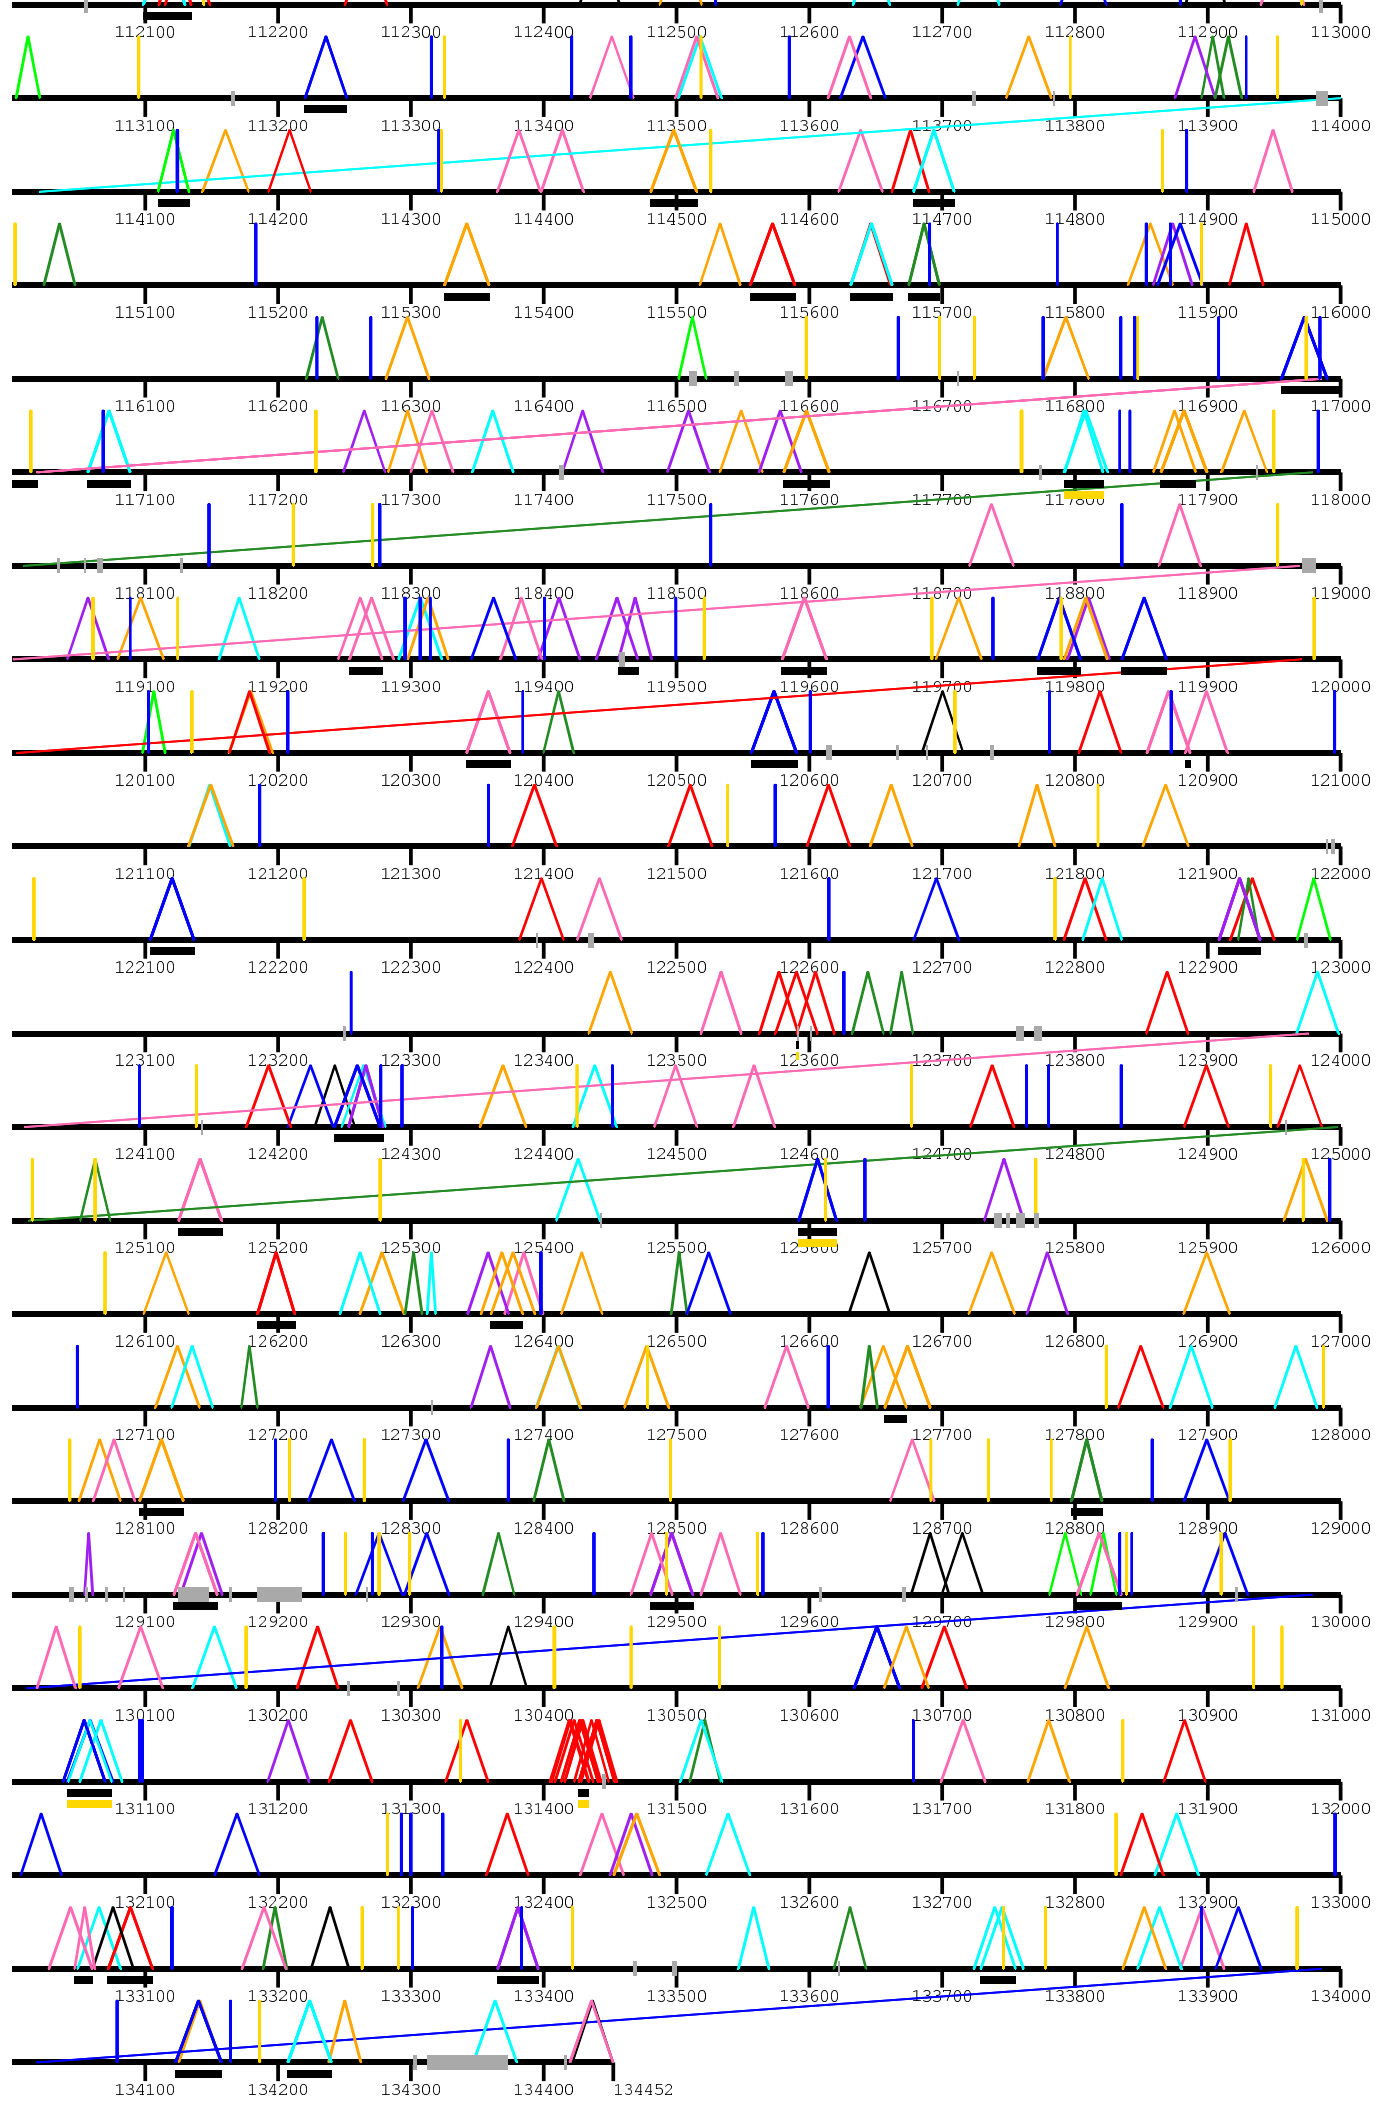

chr12

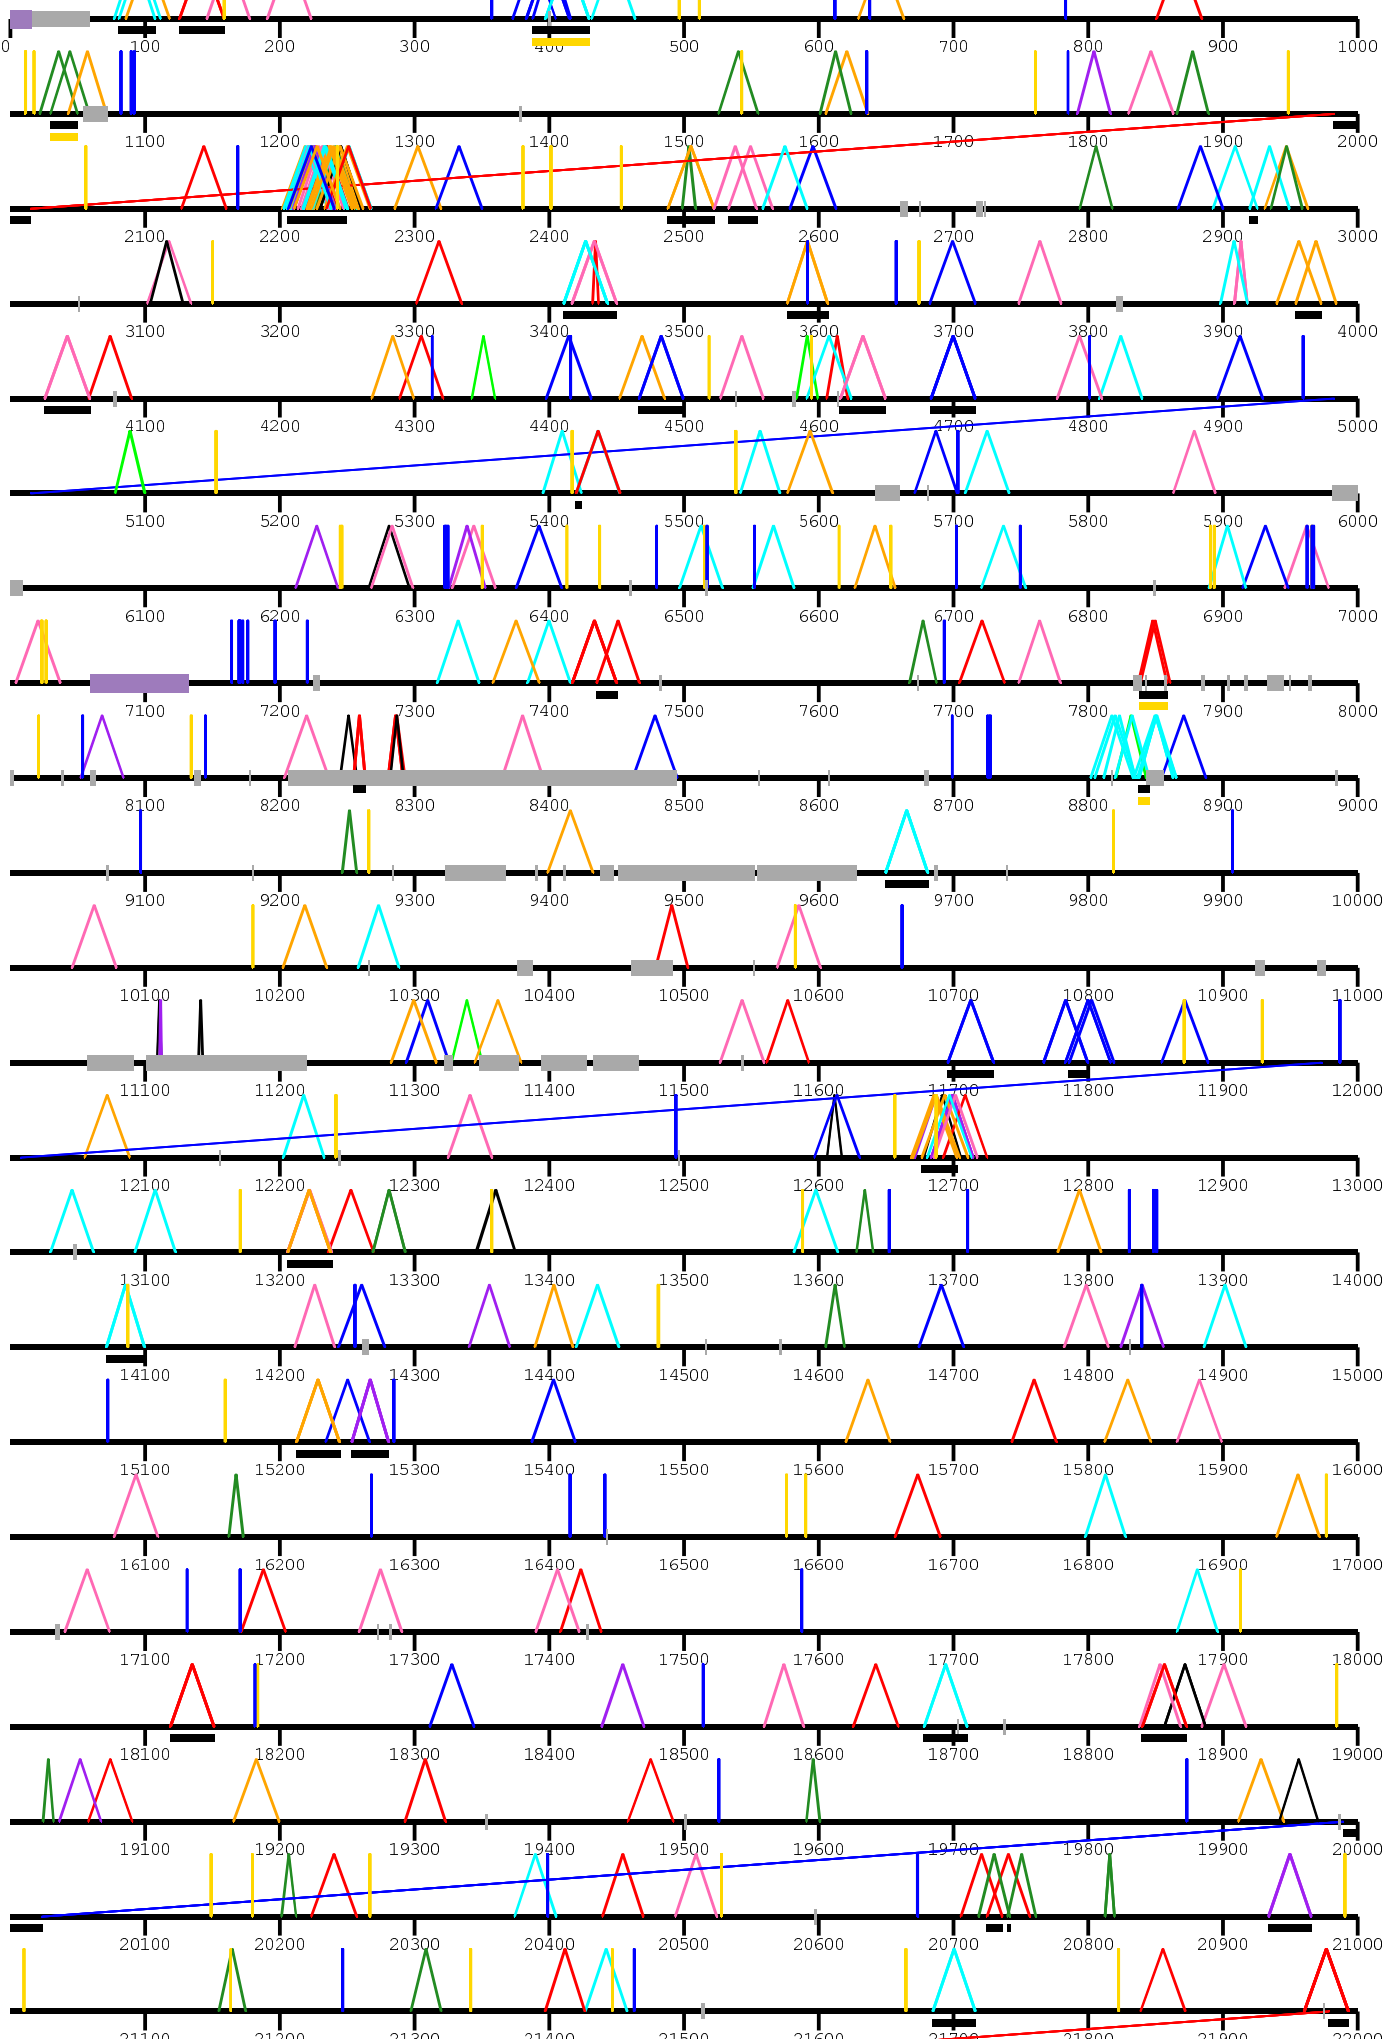

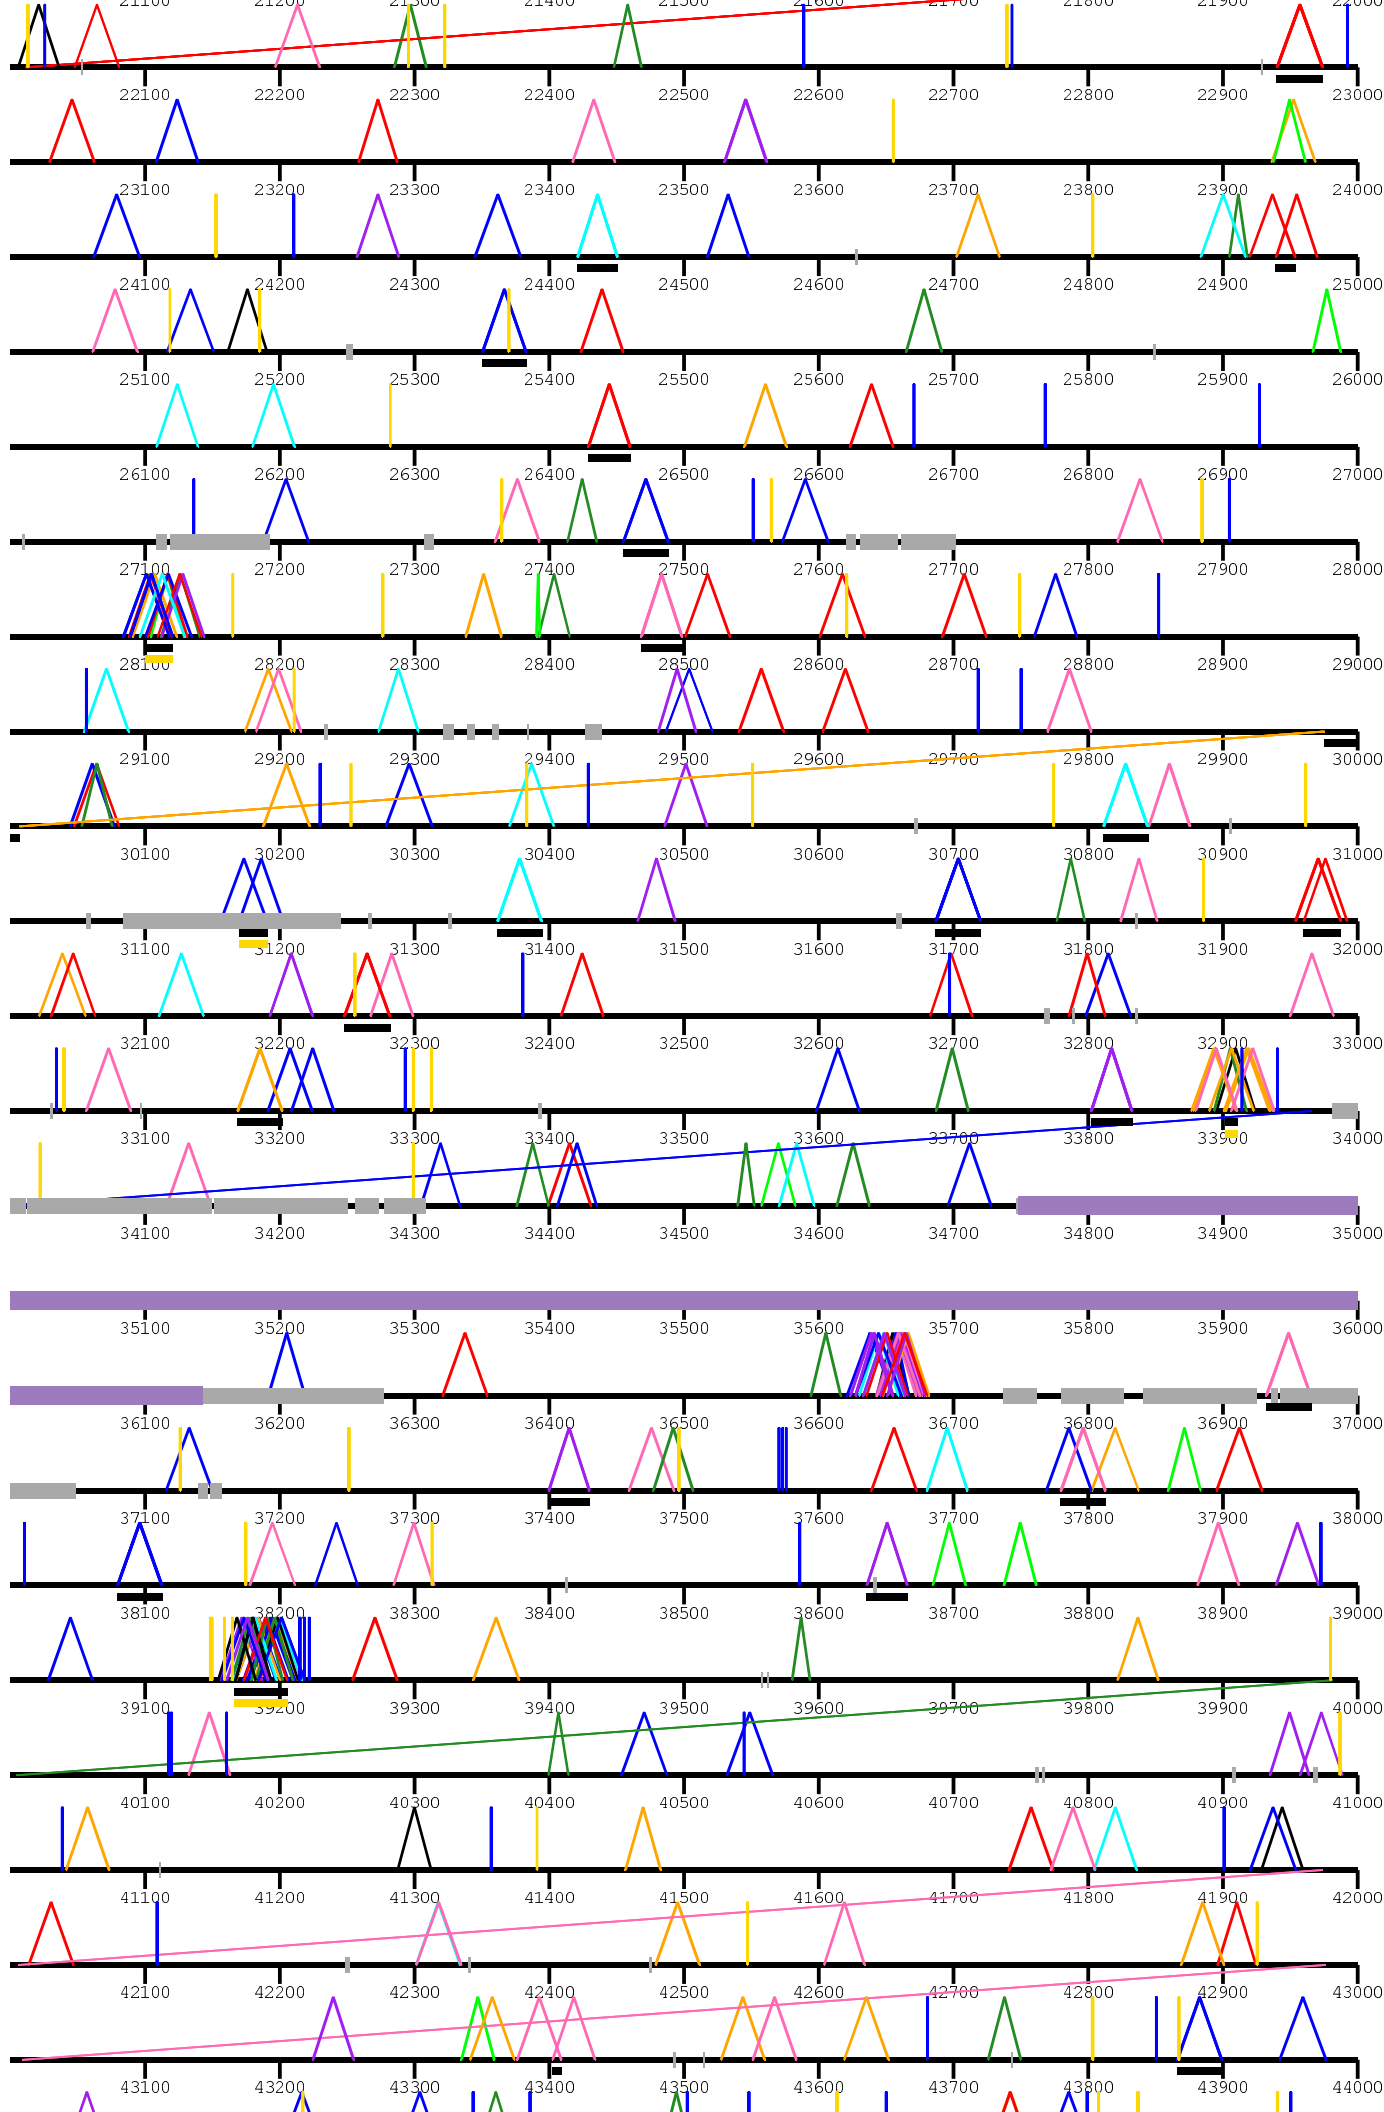

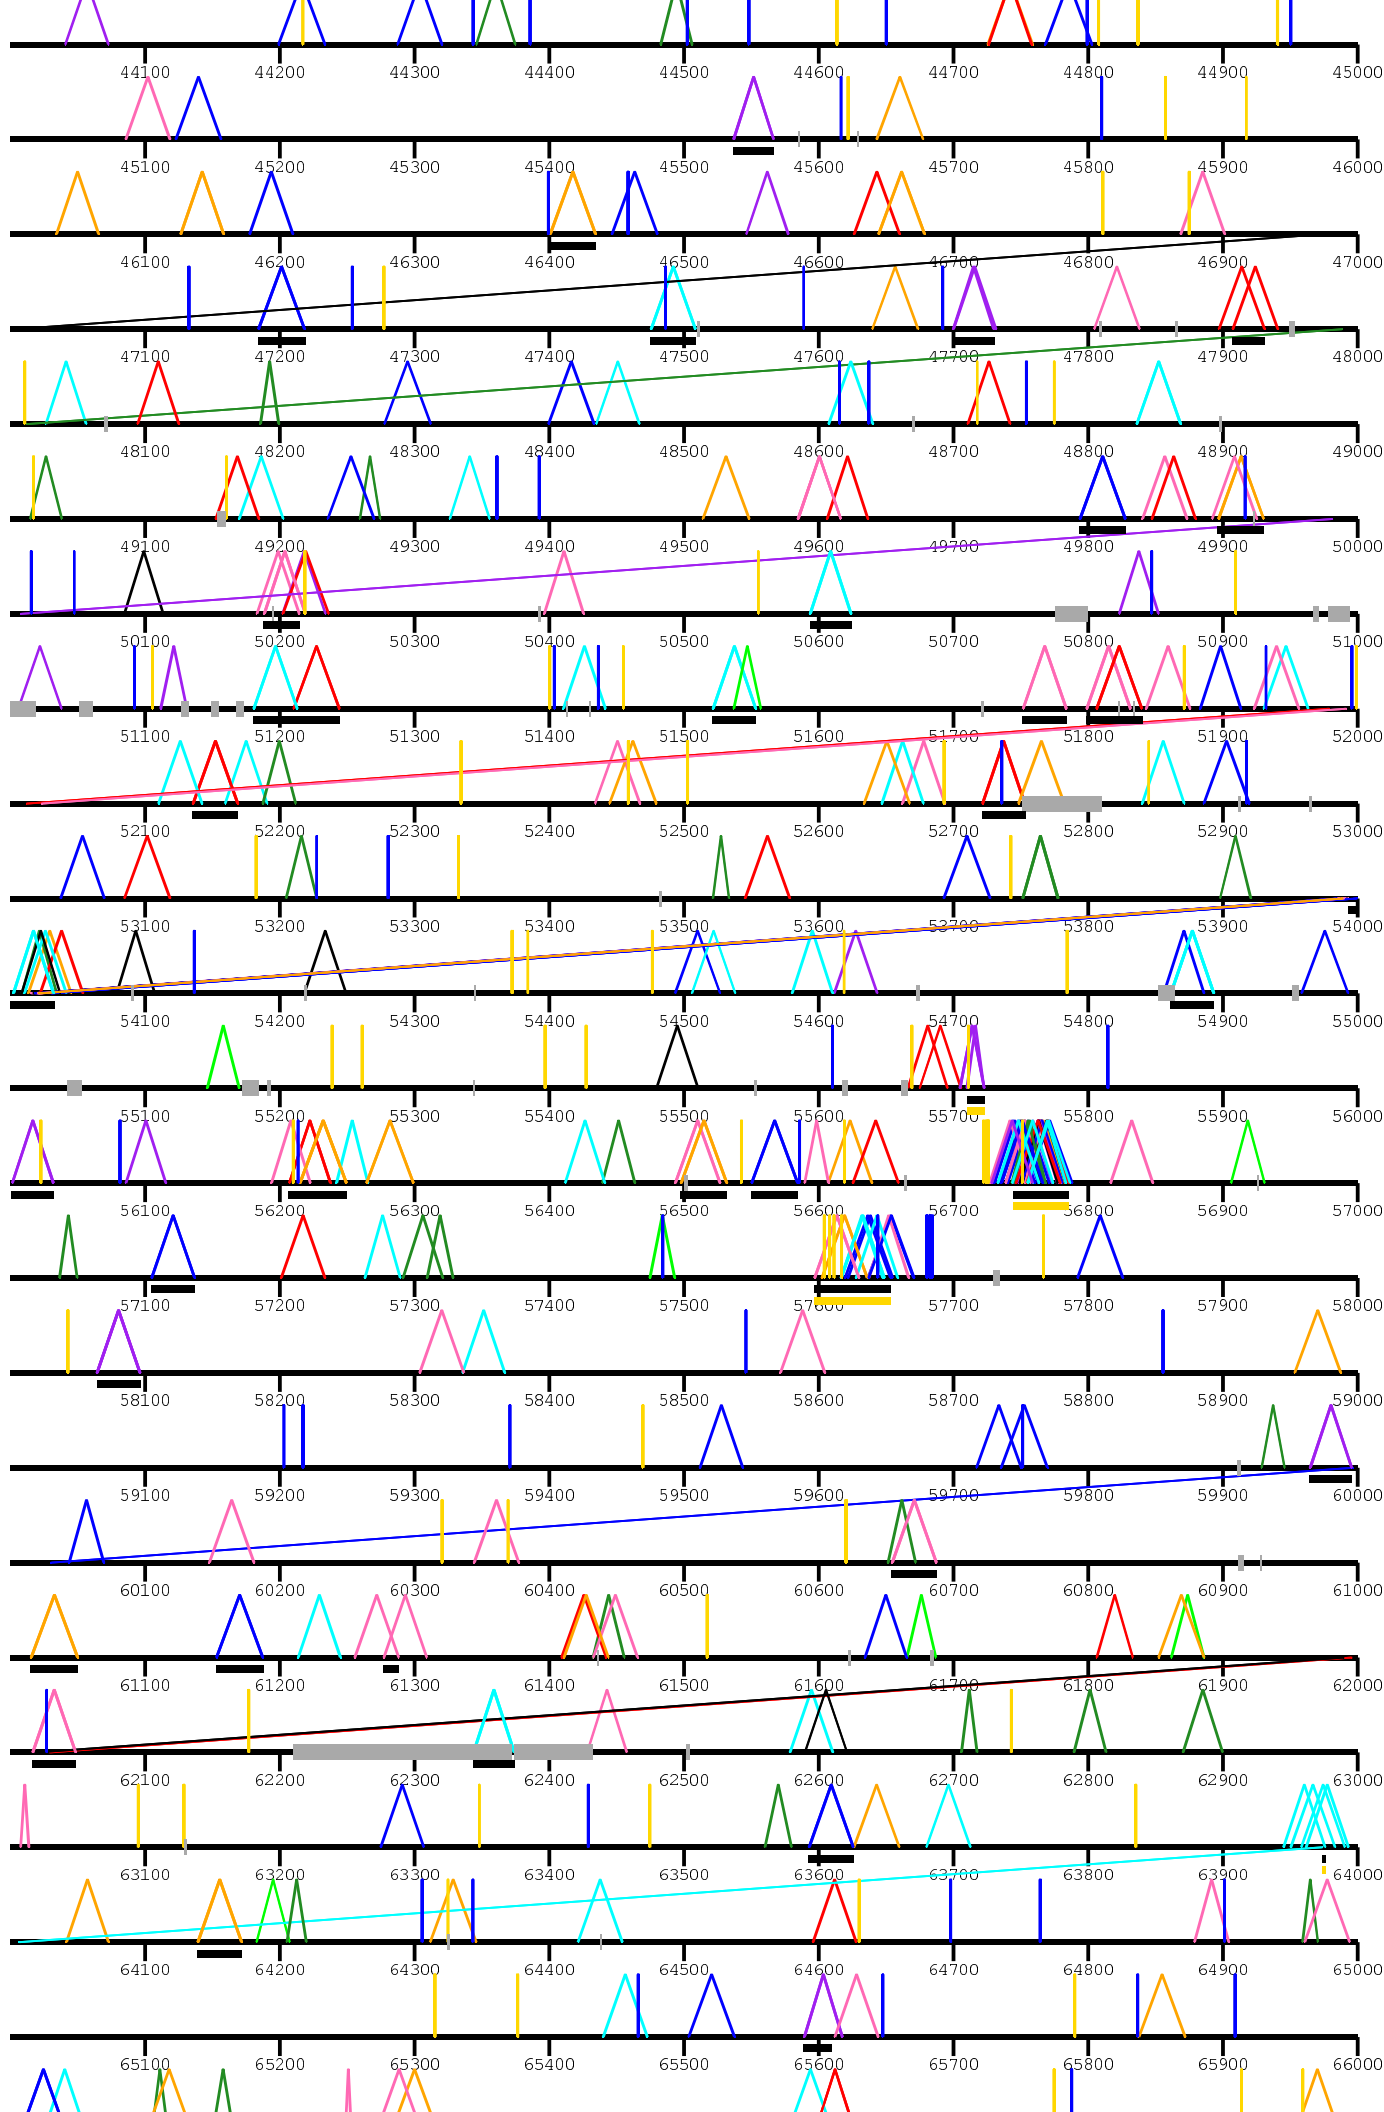

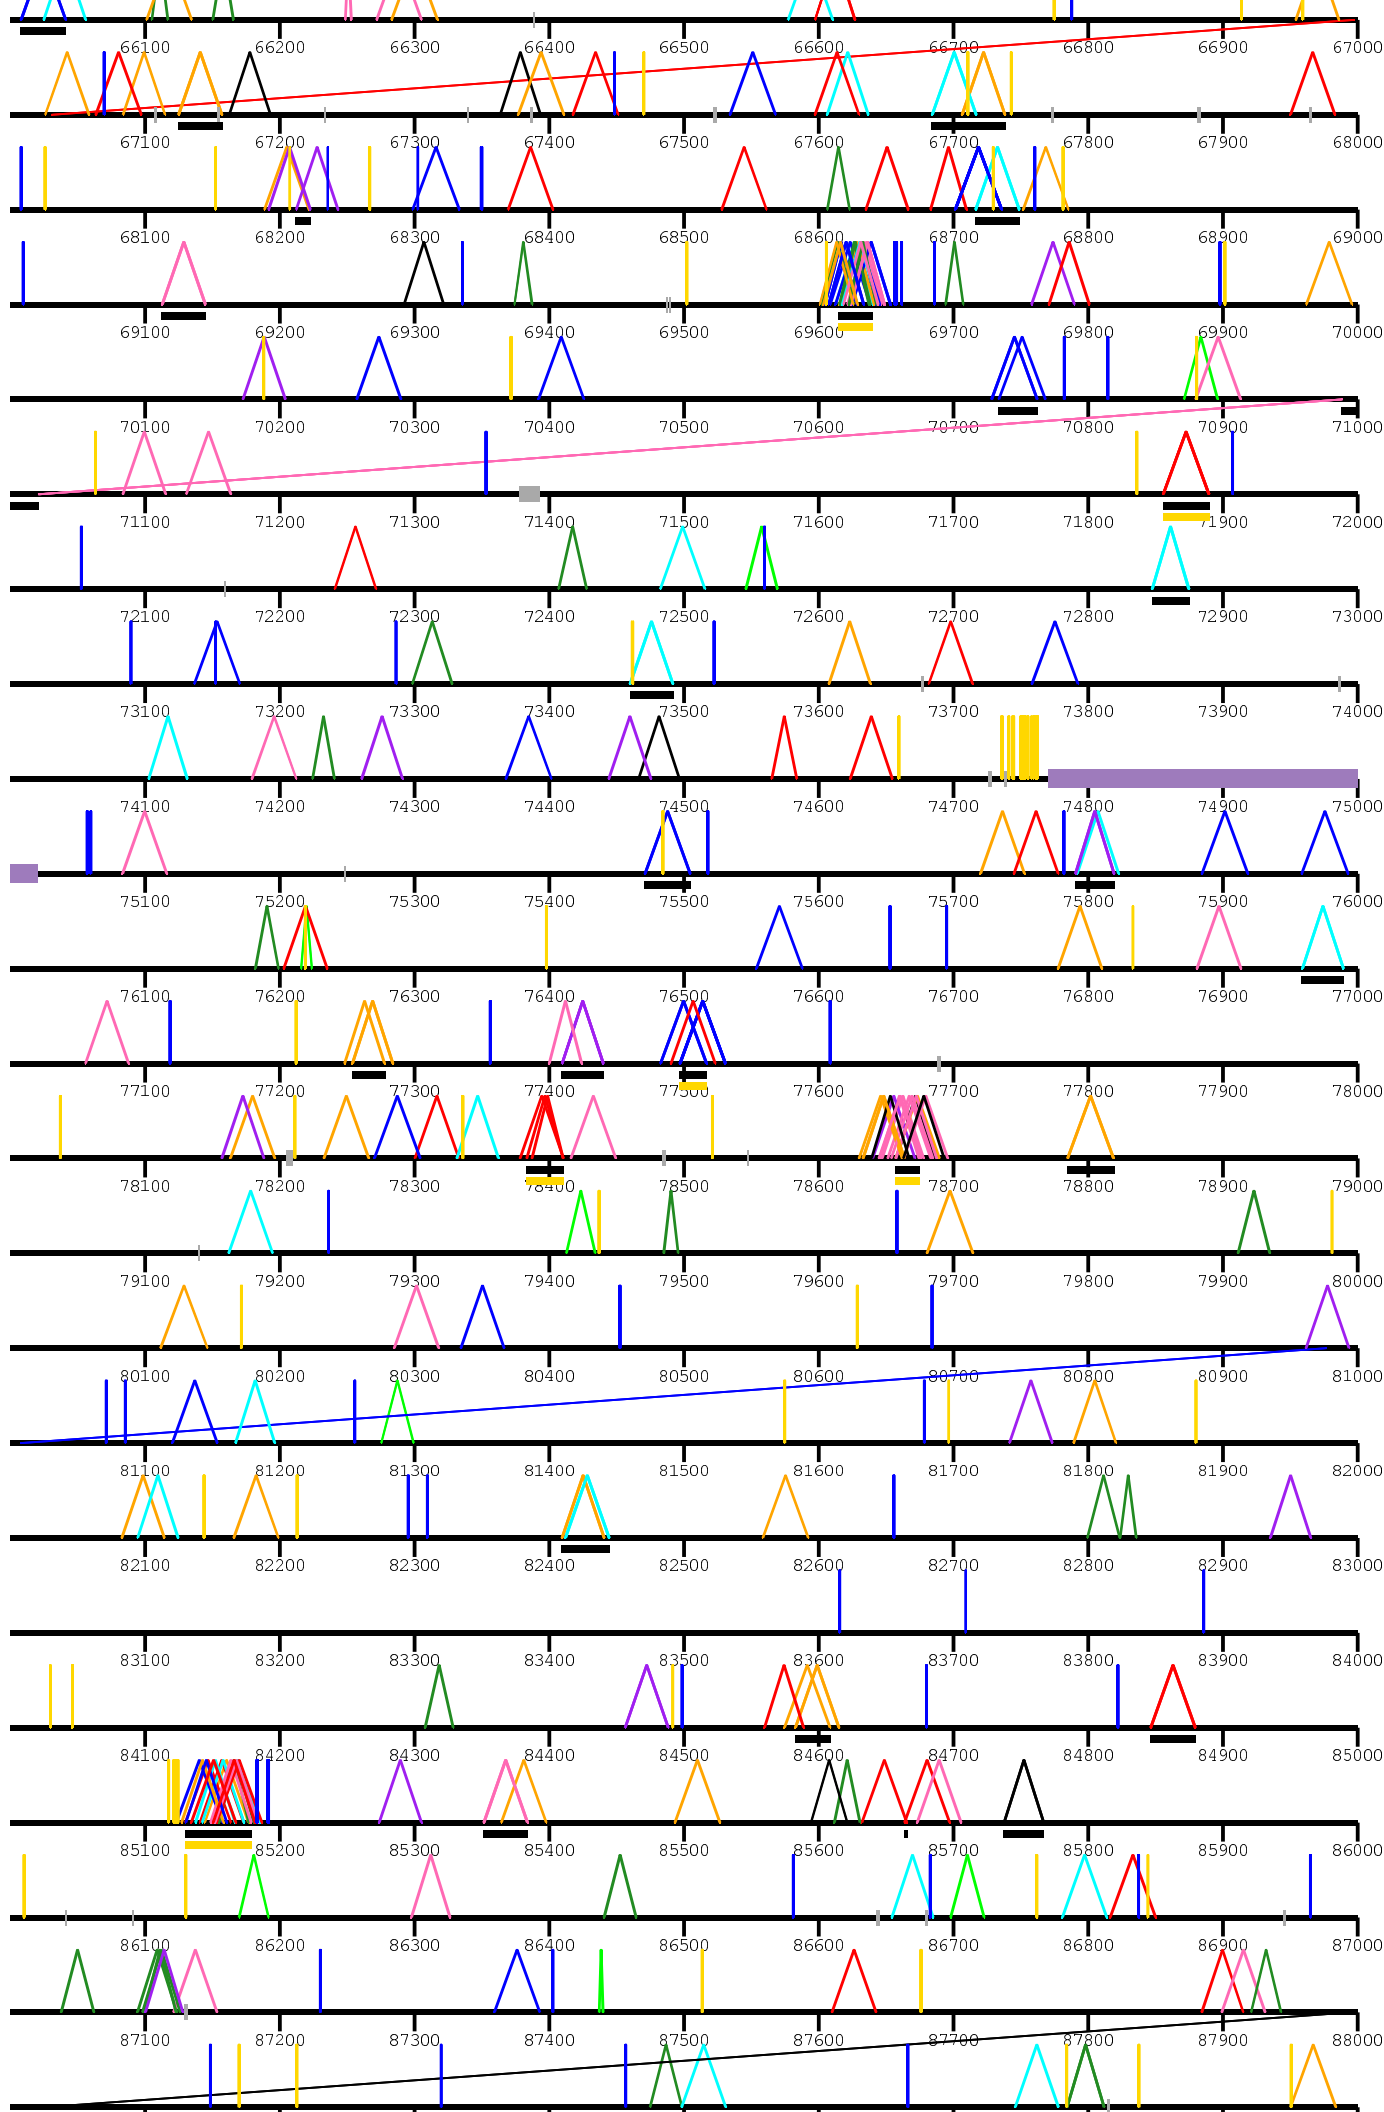

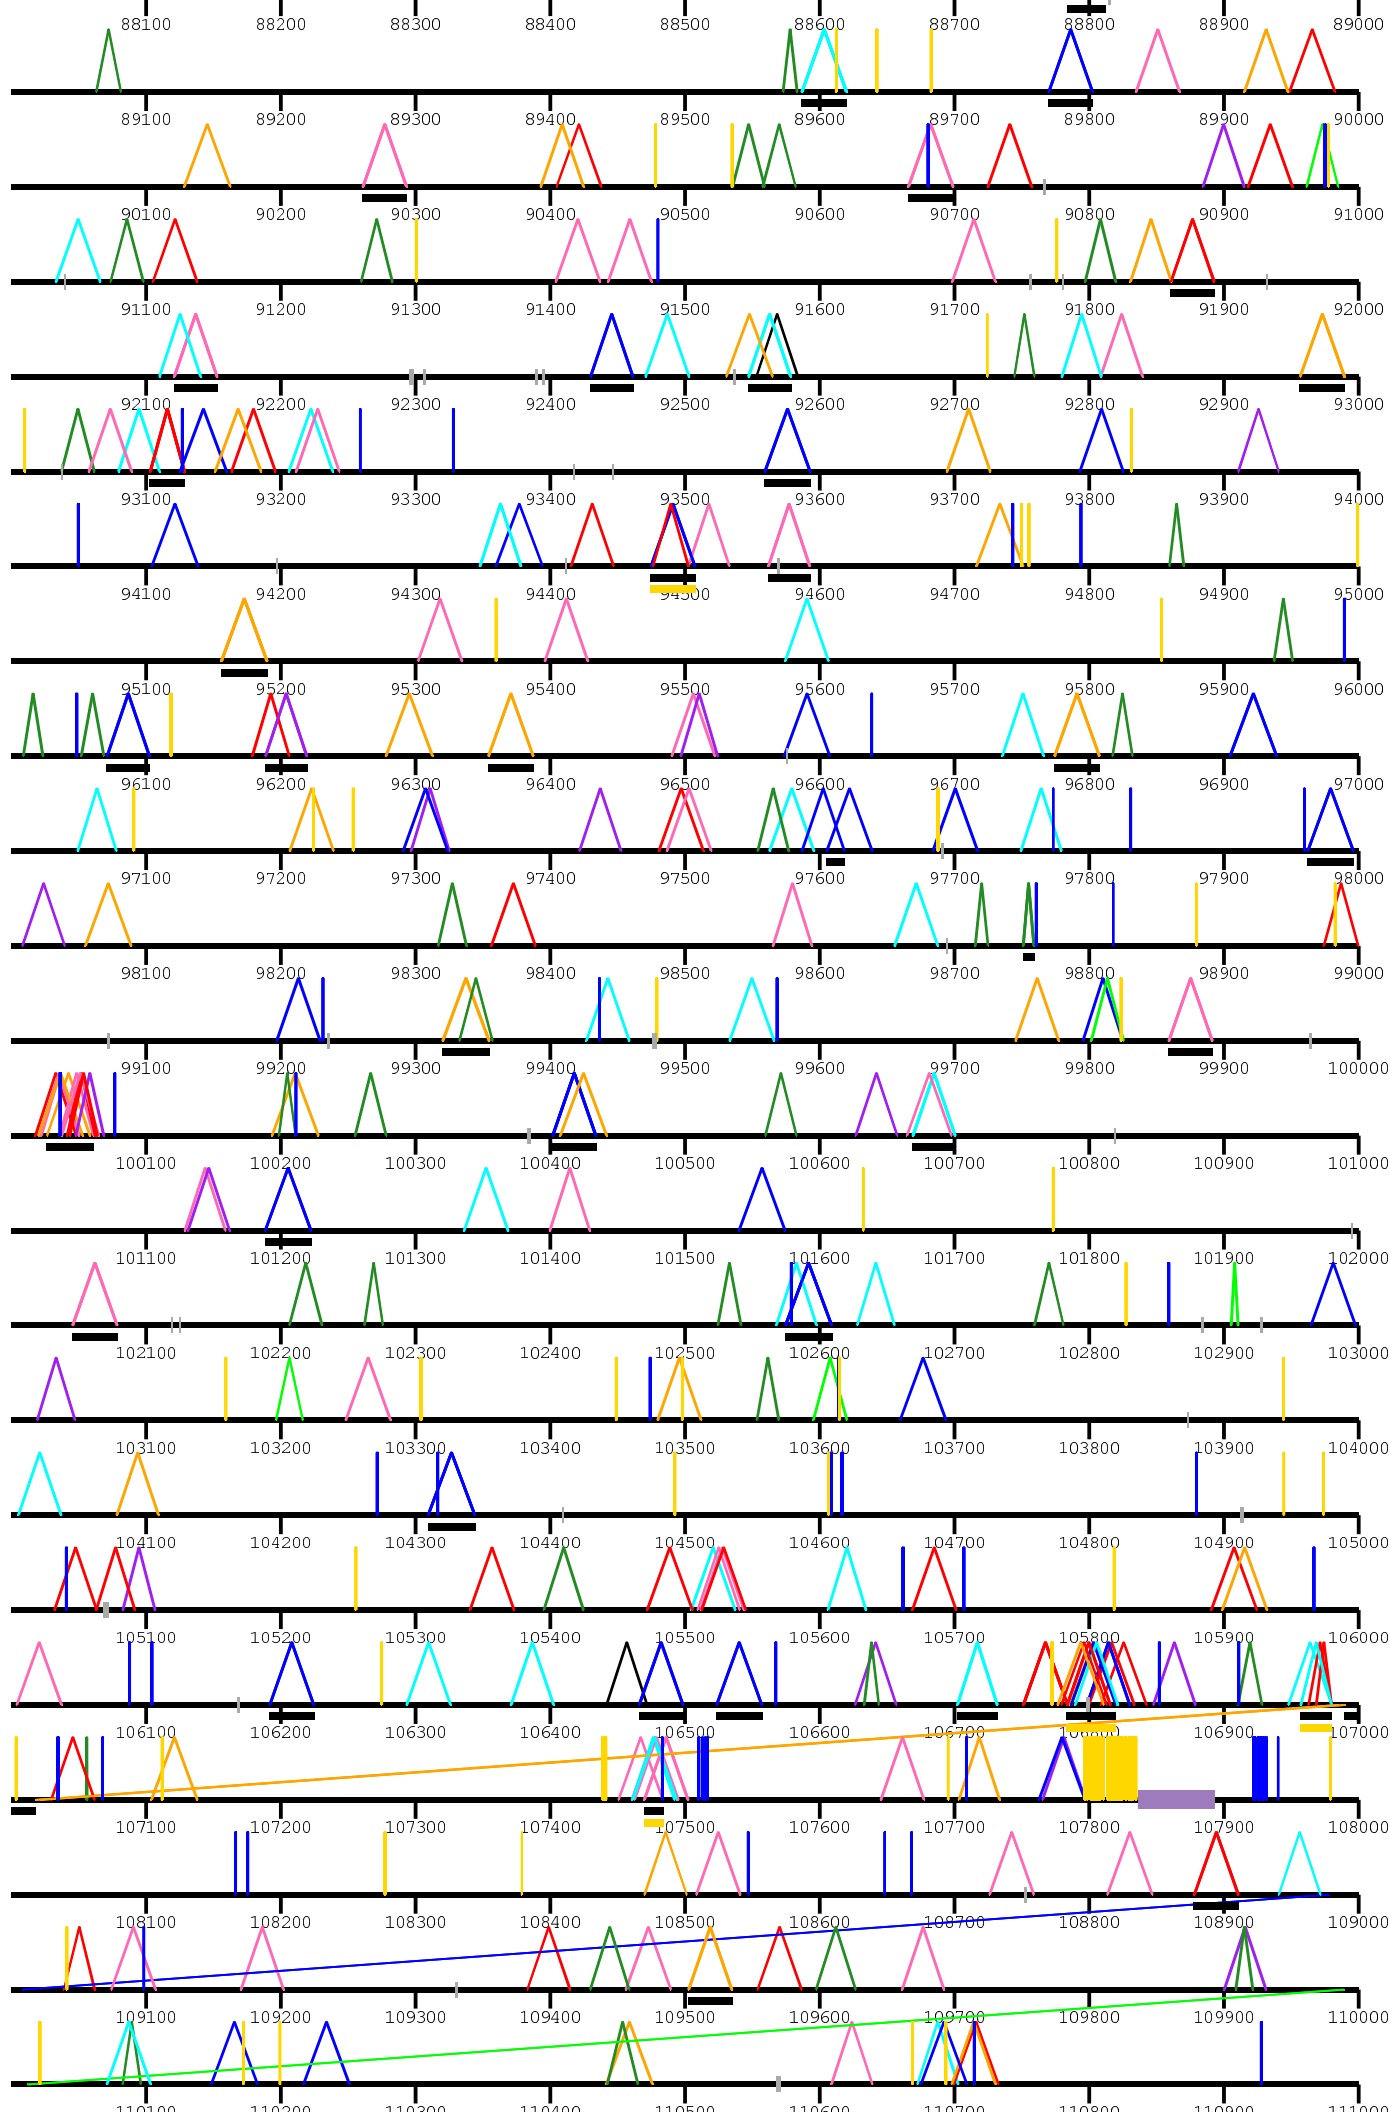

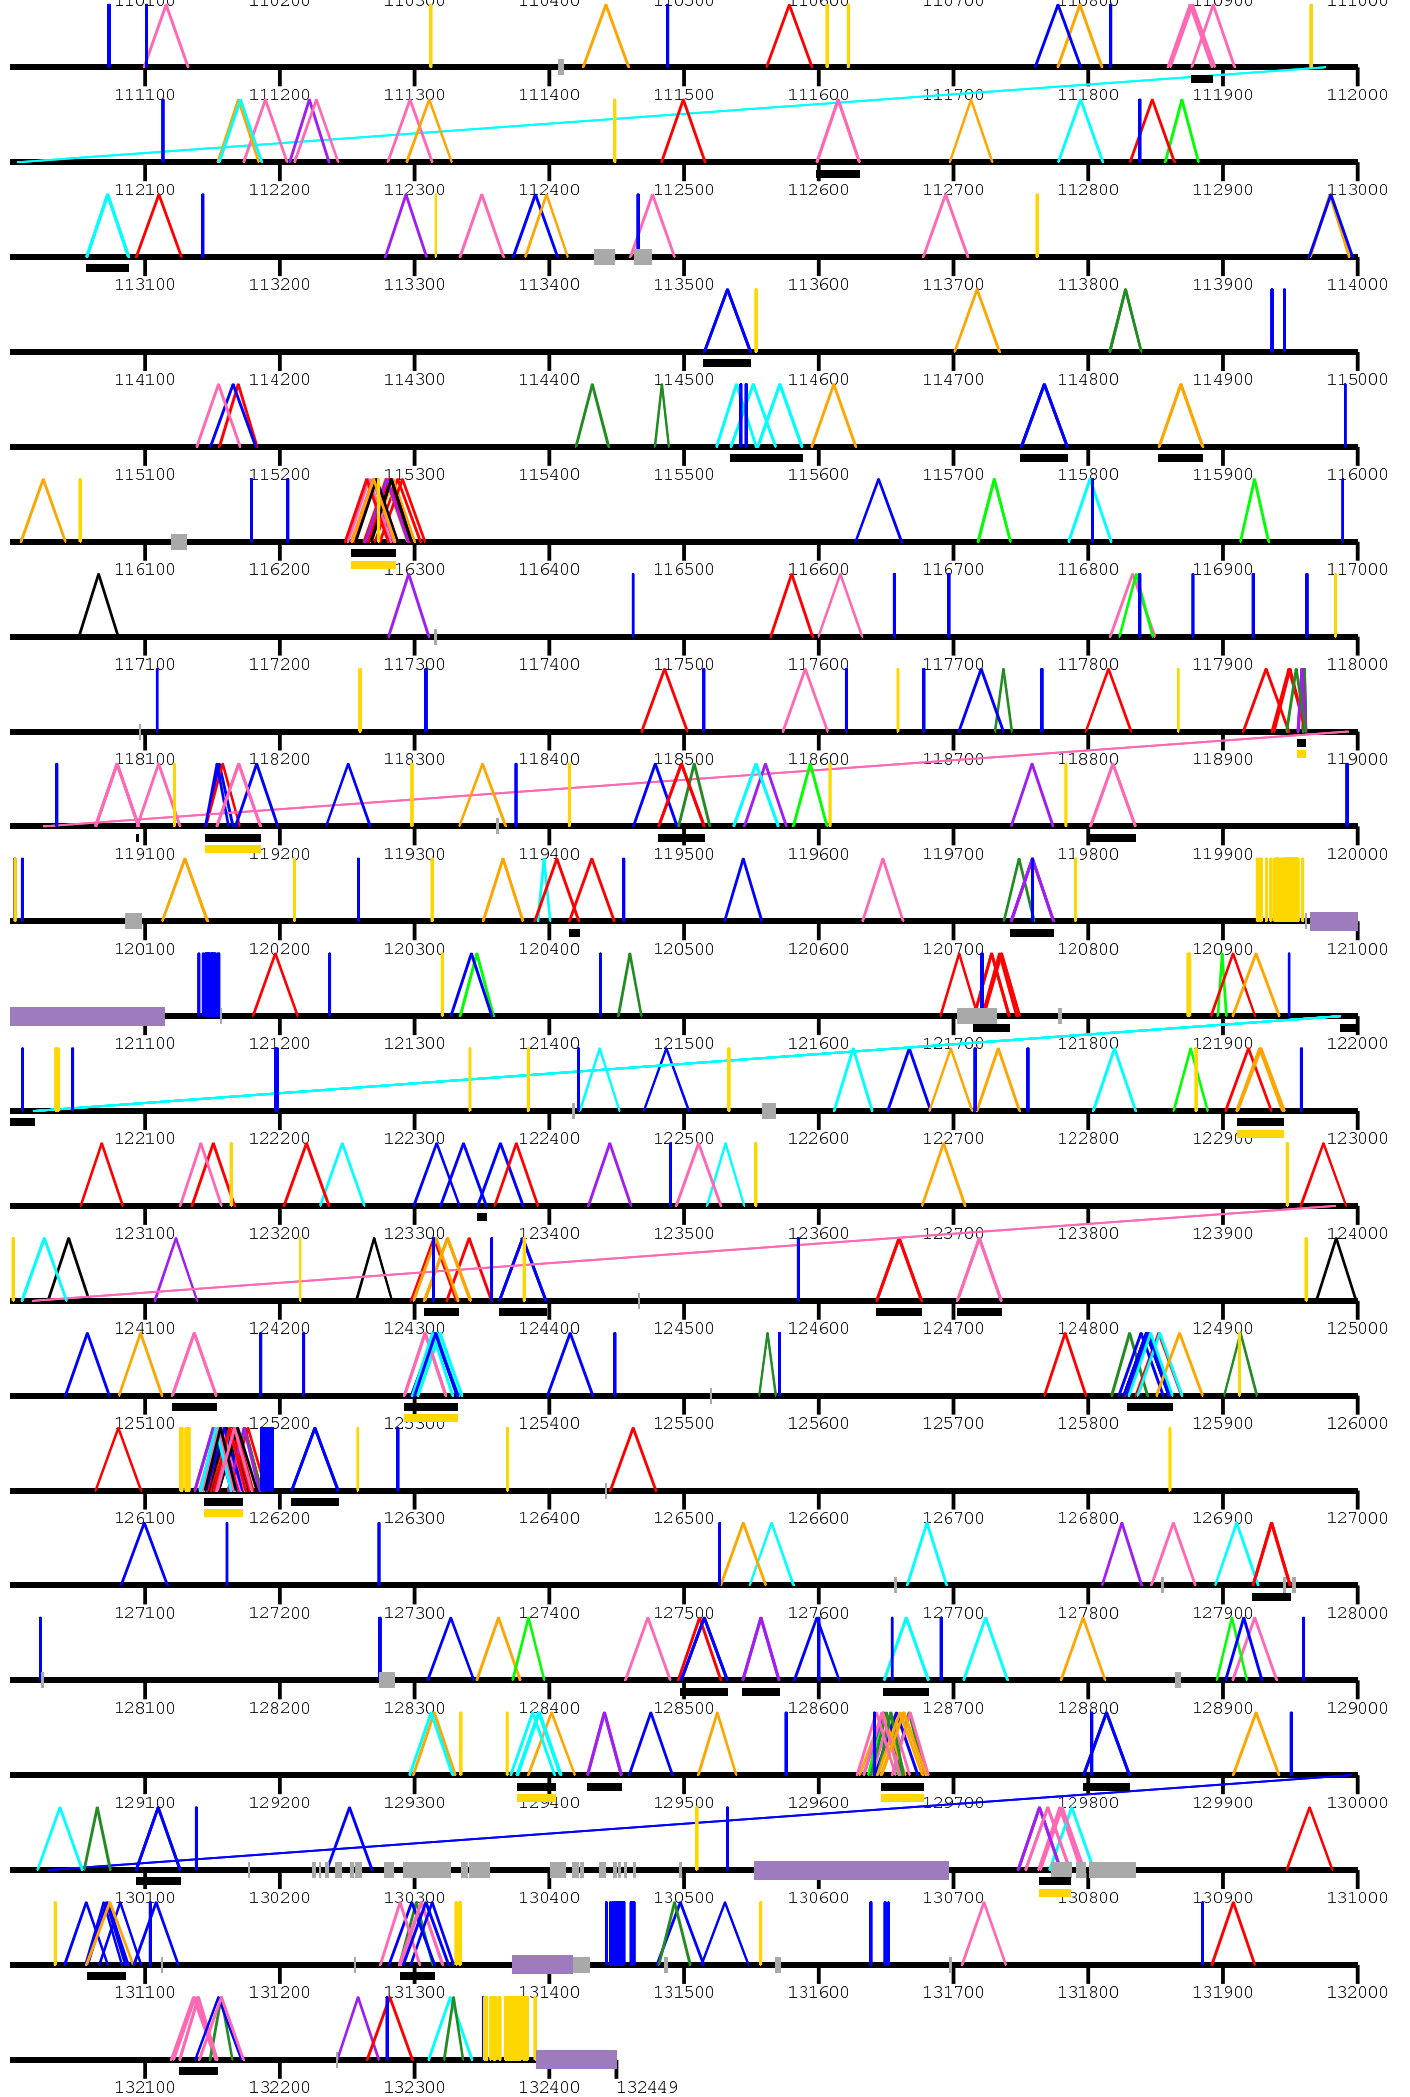



chr13

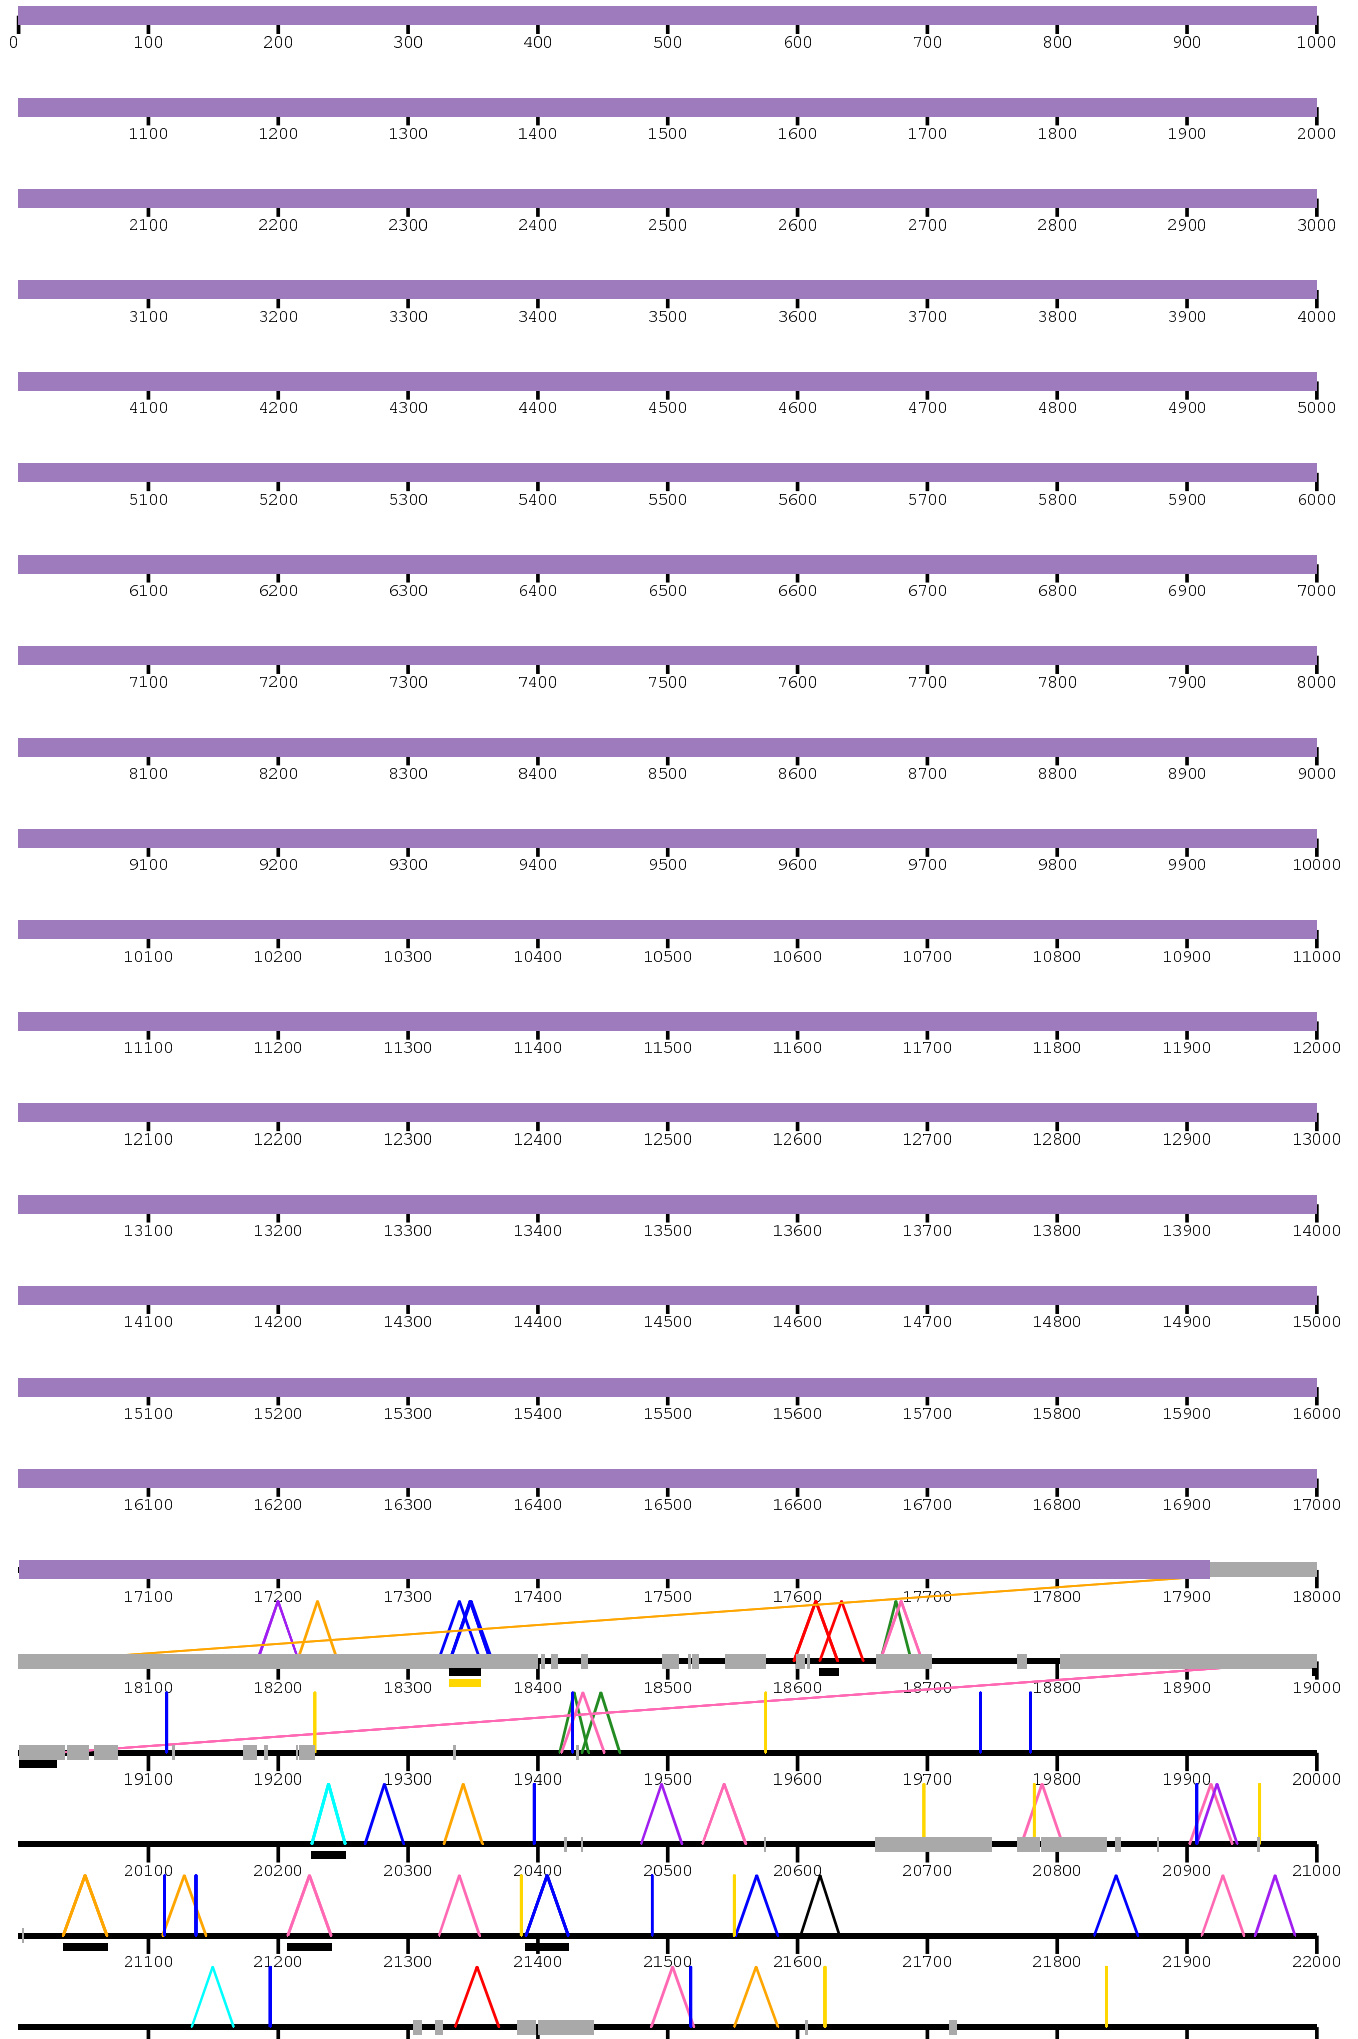

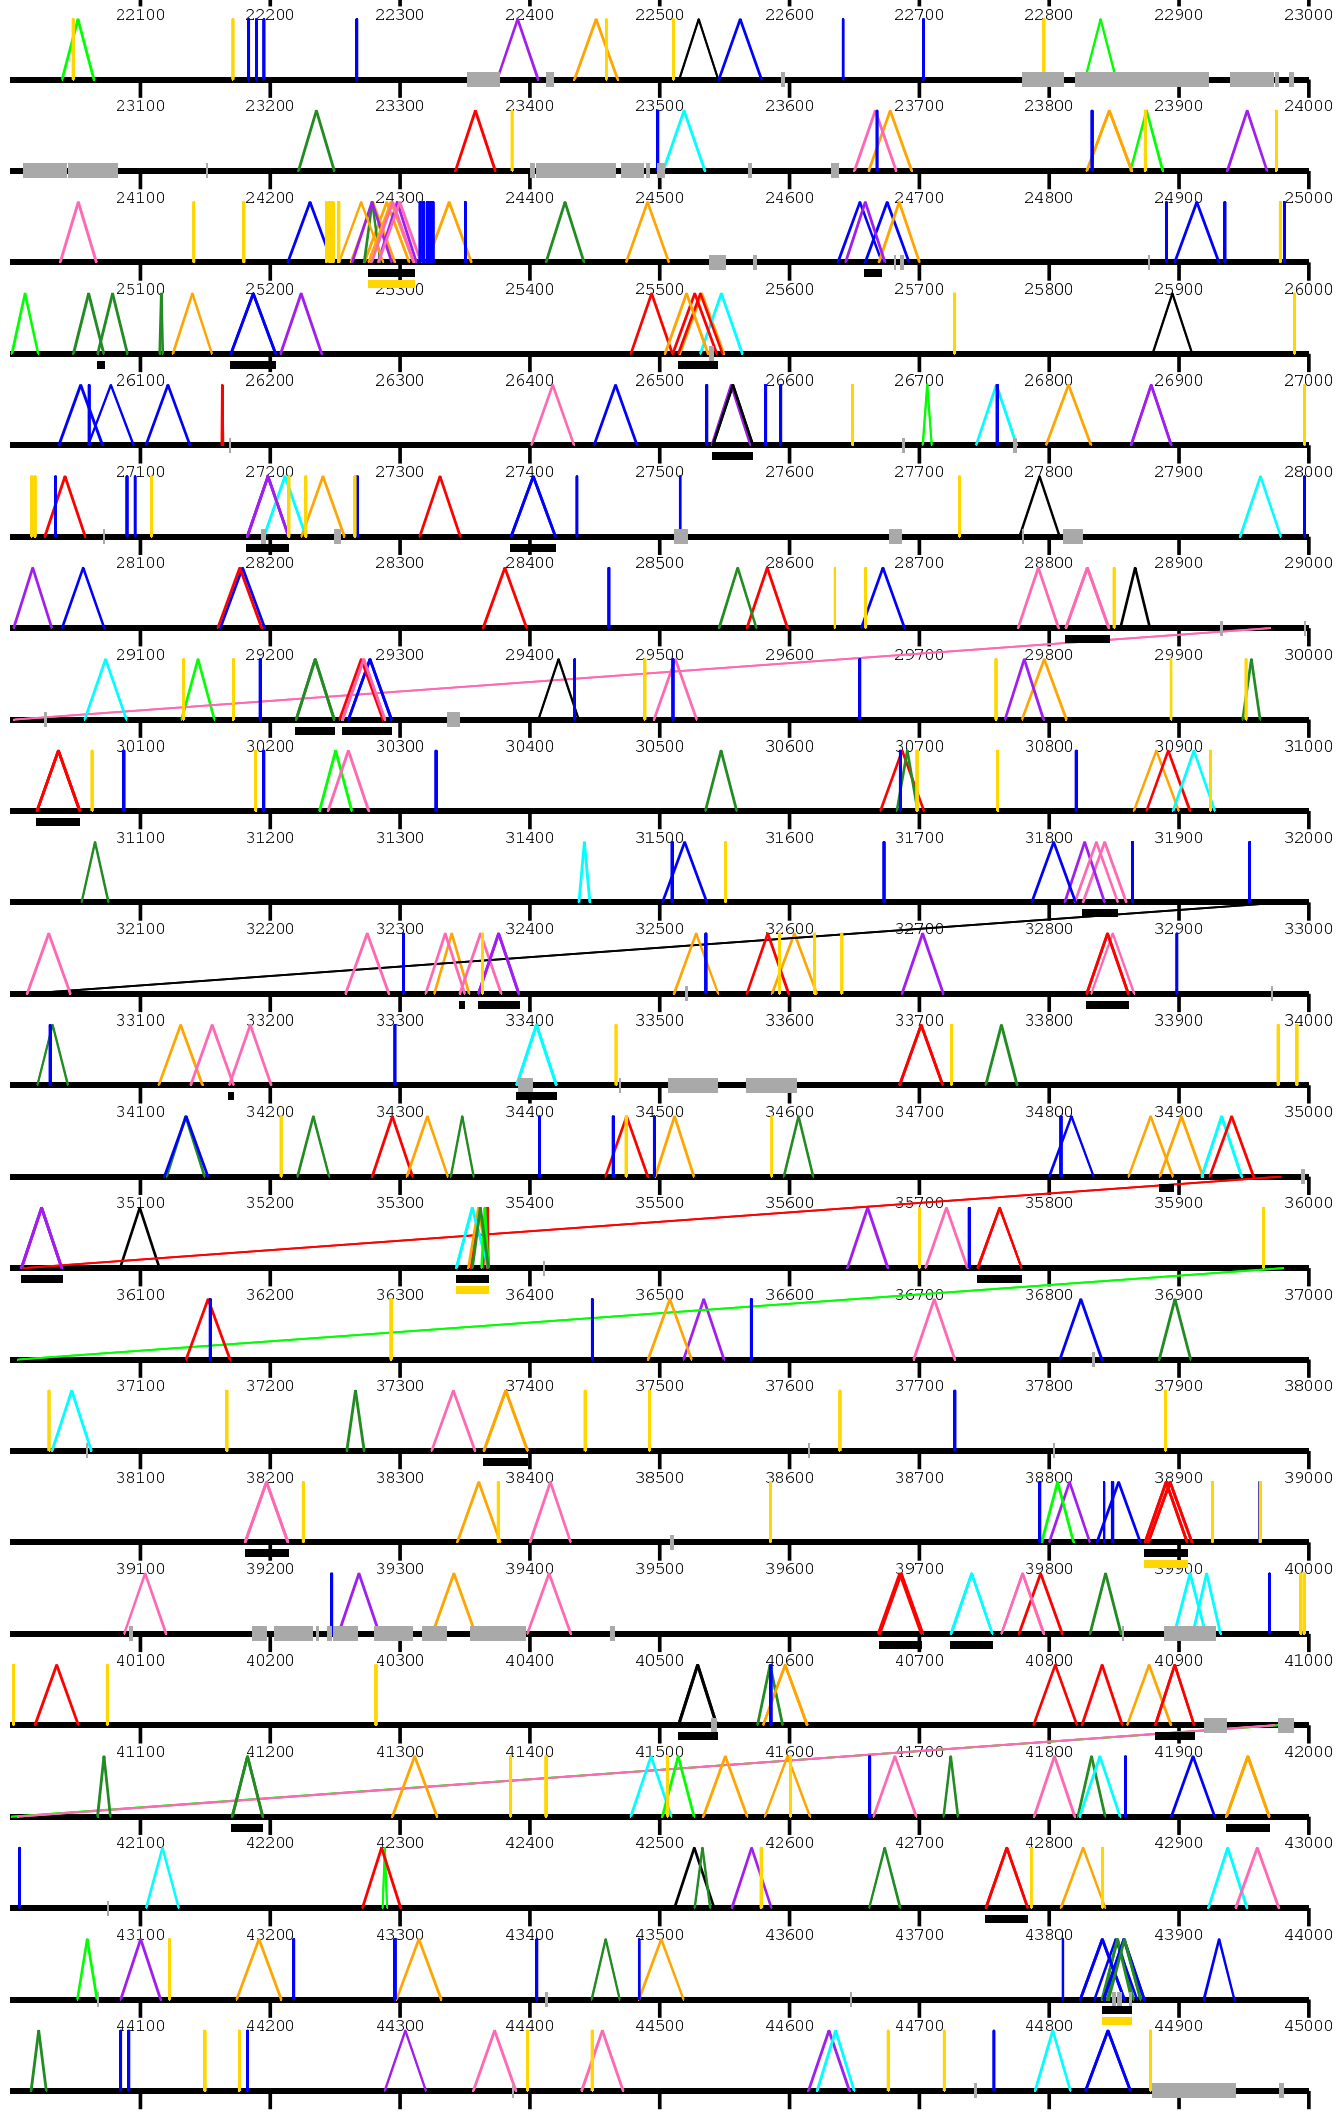

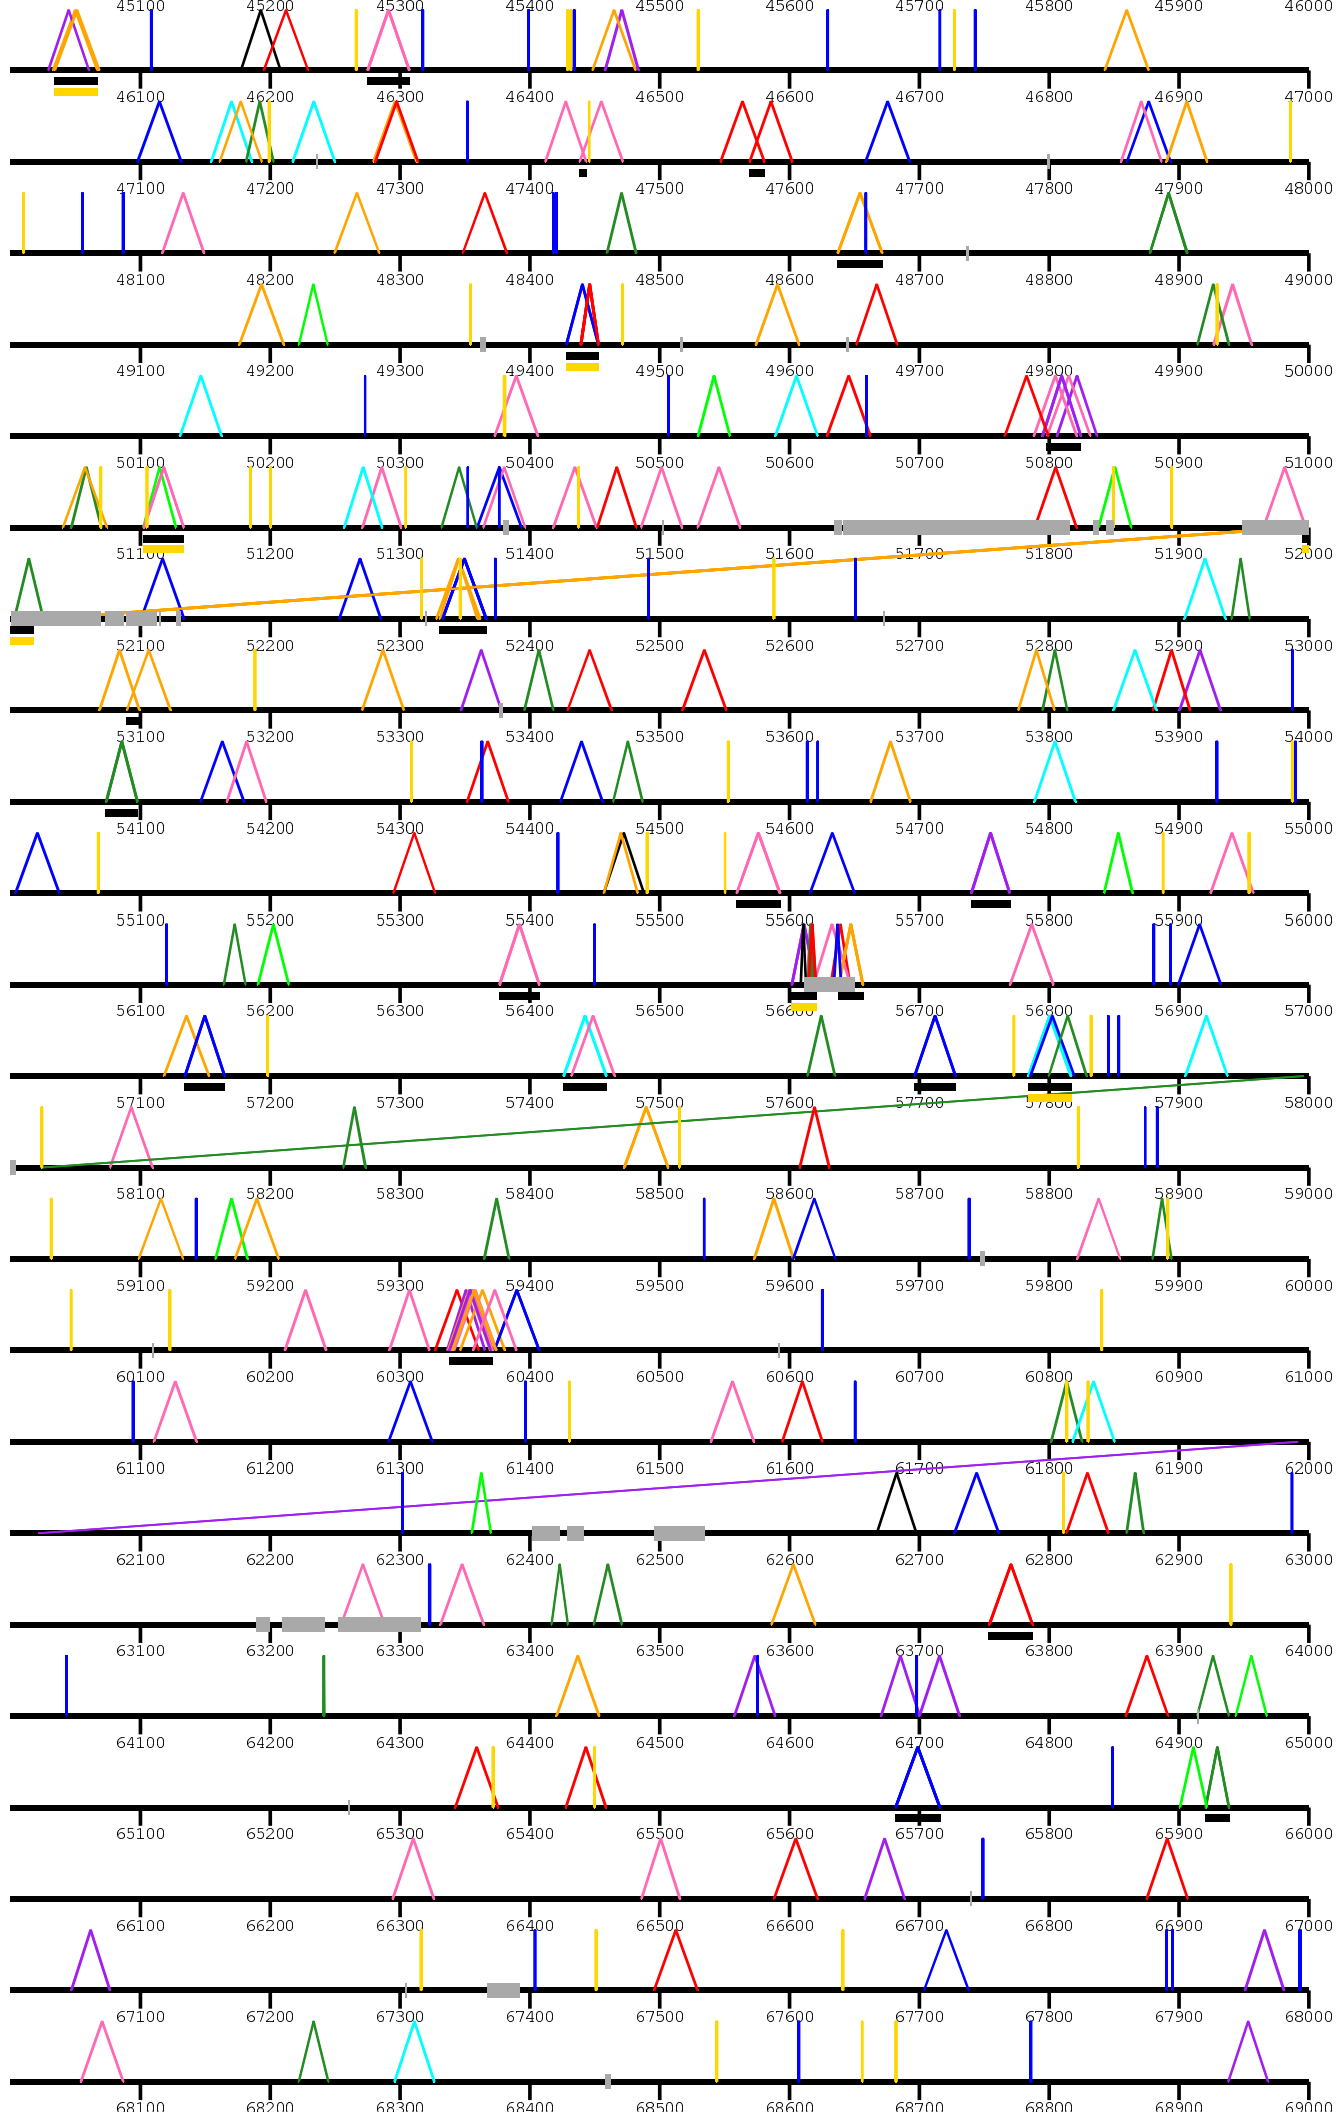

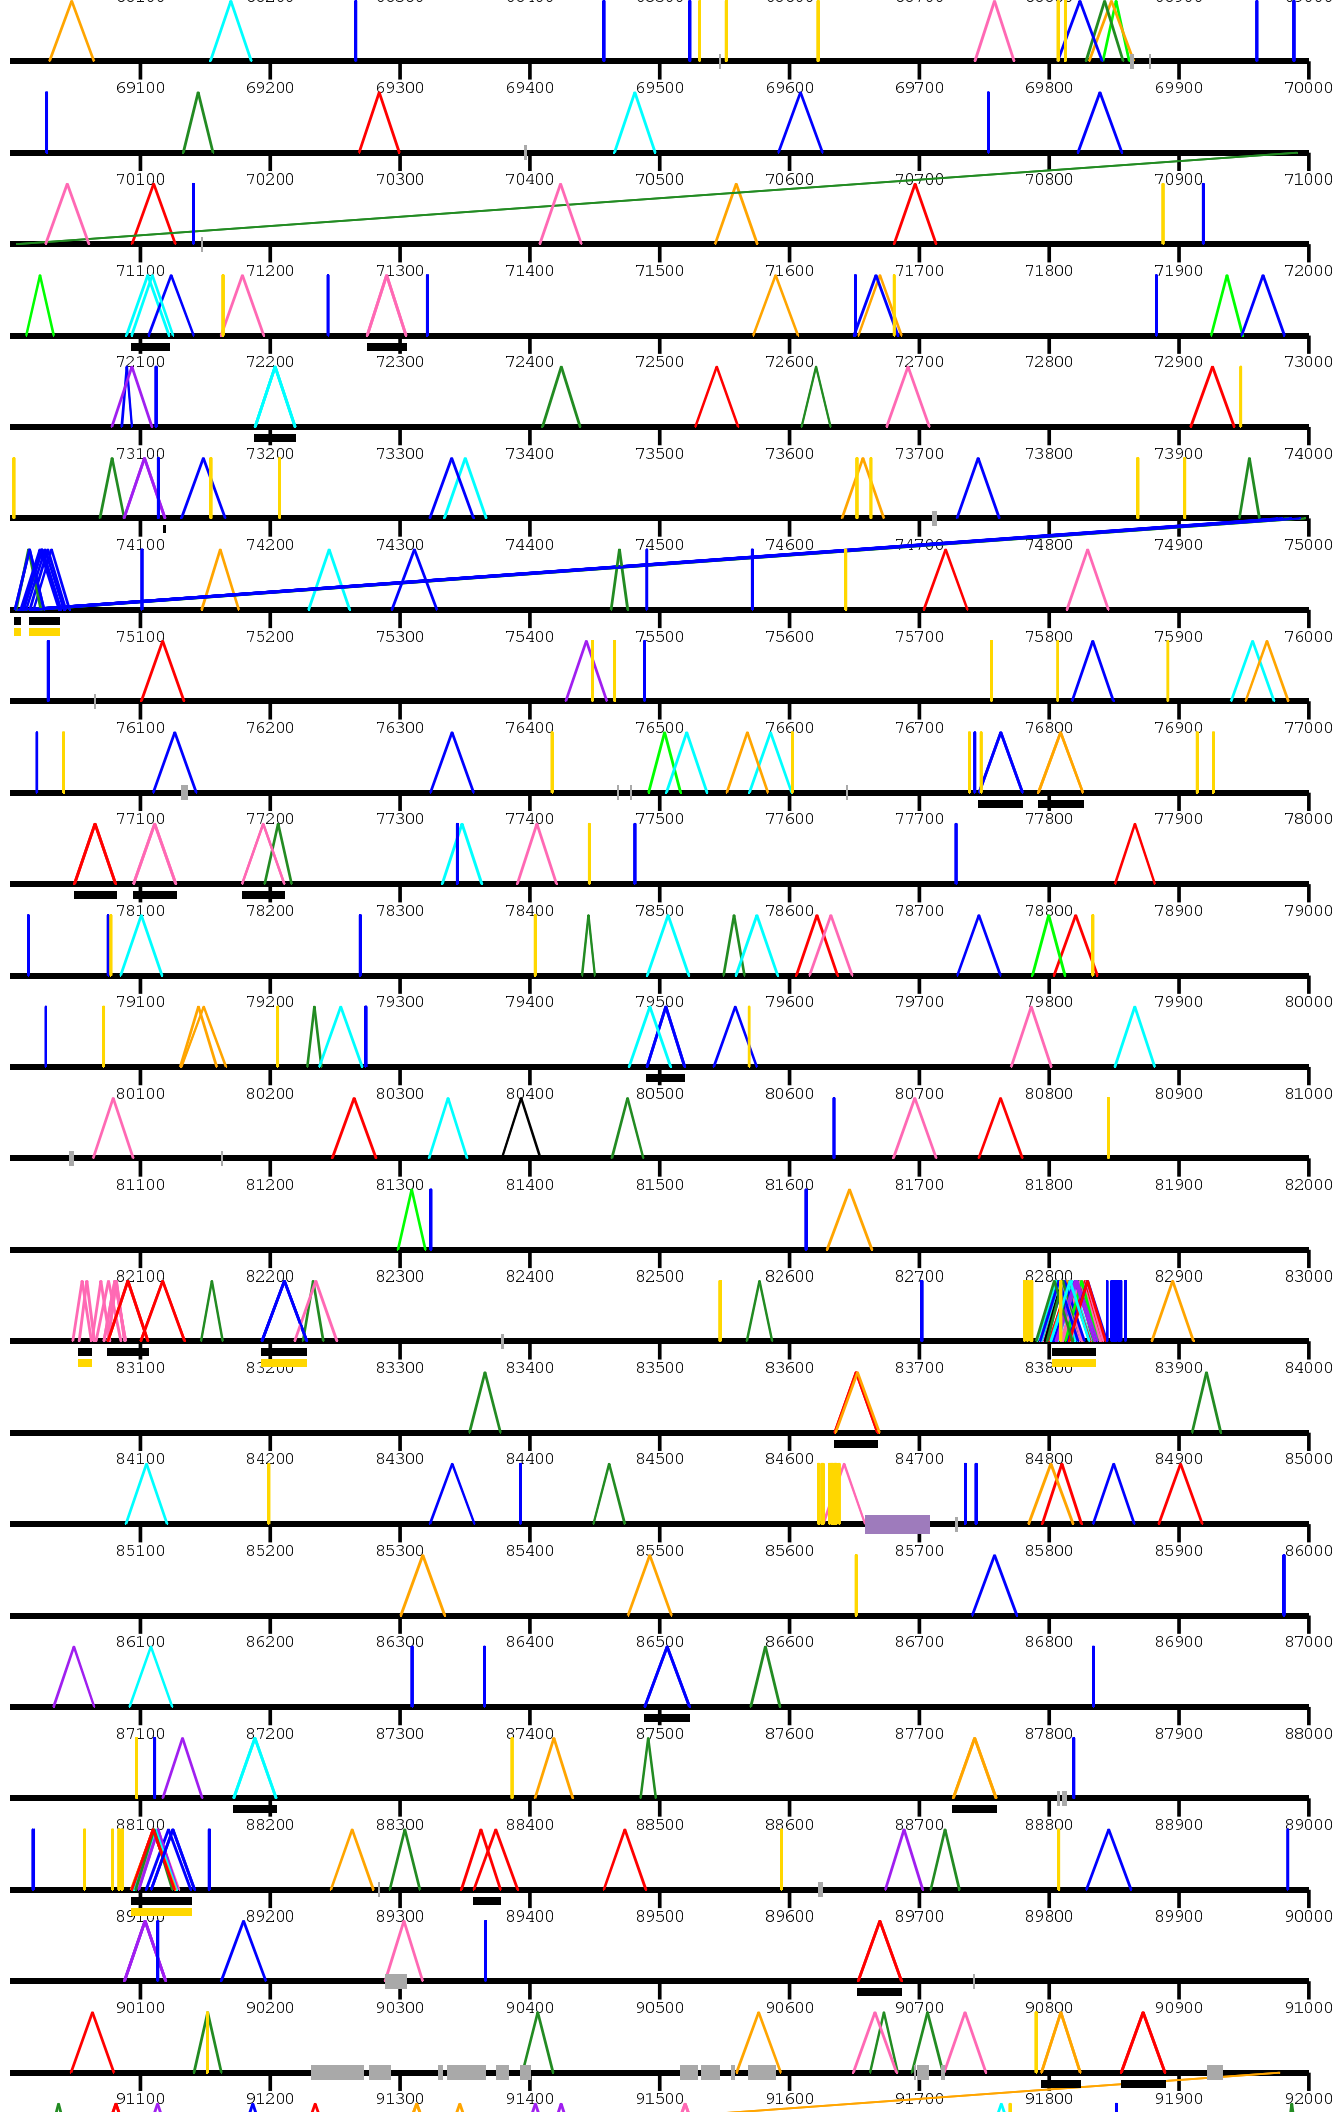

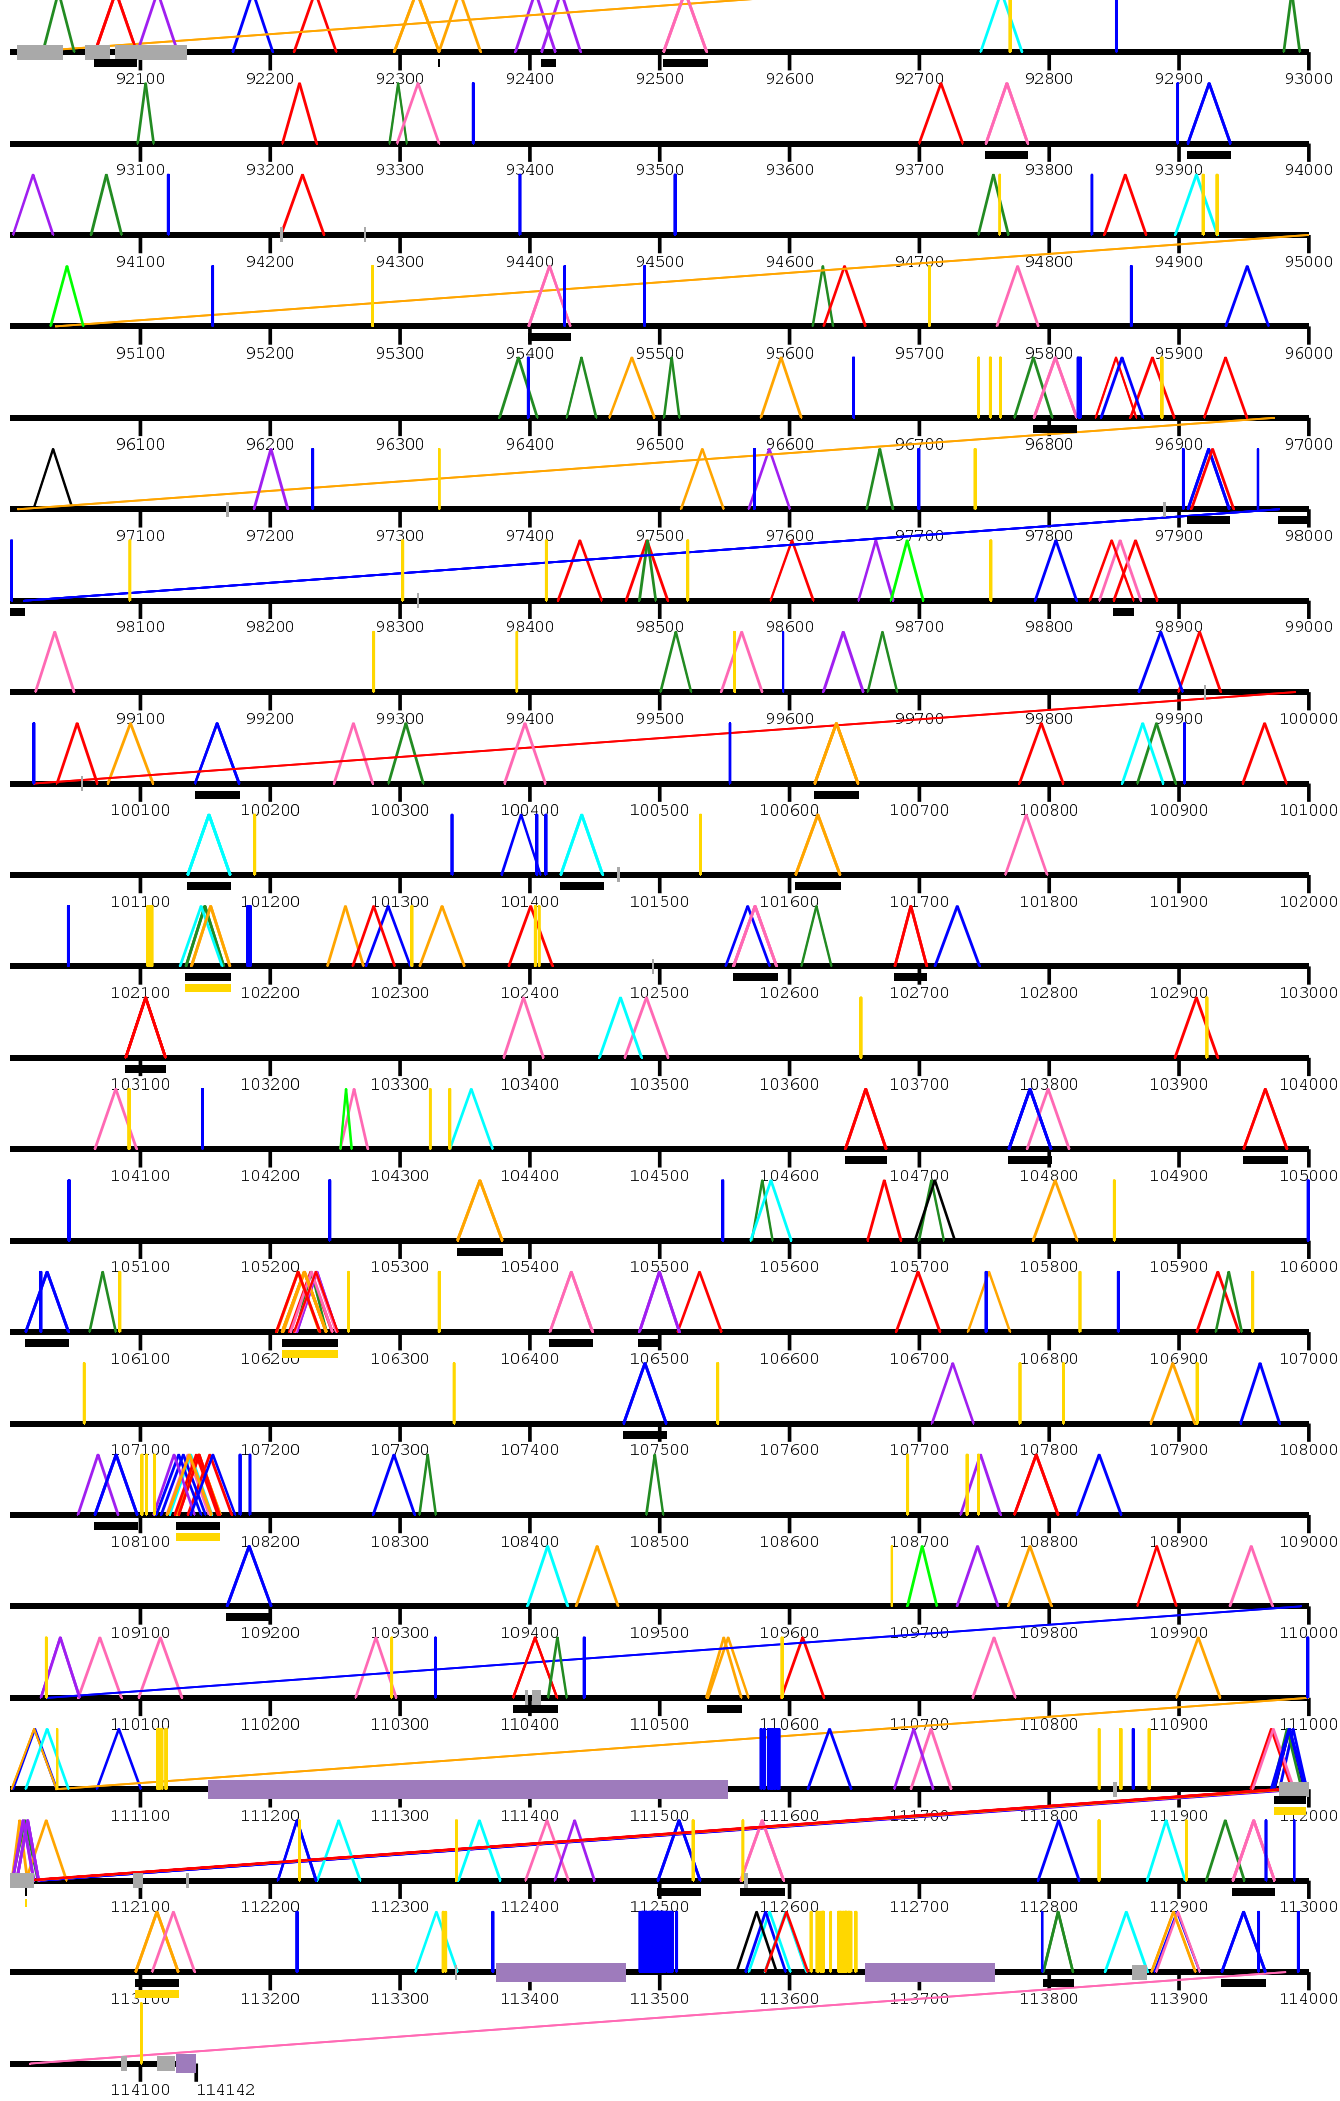

chr14

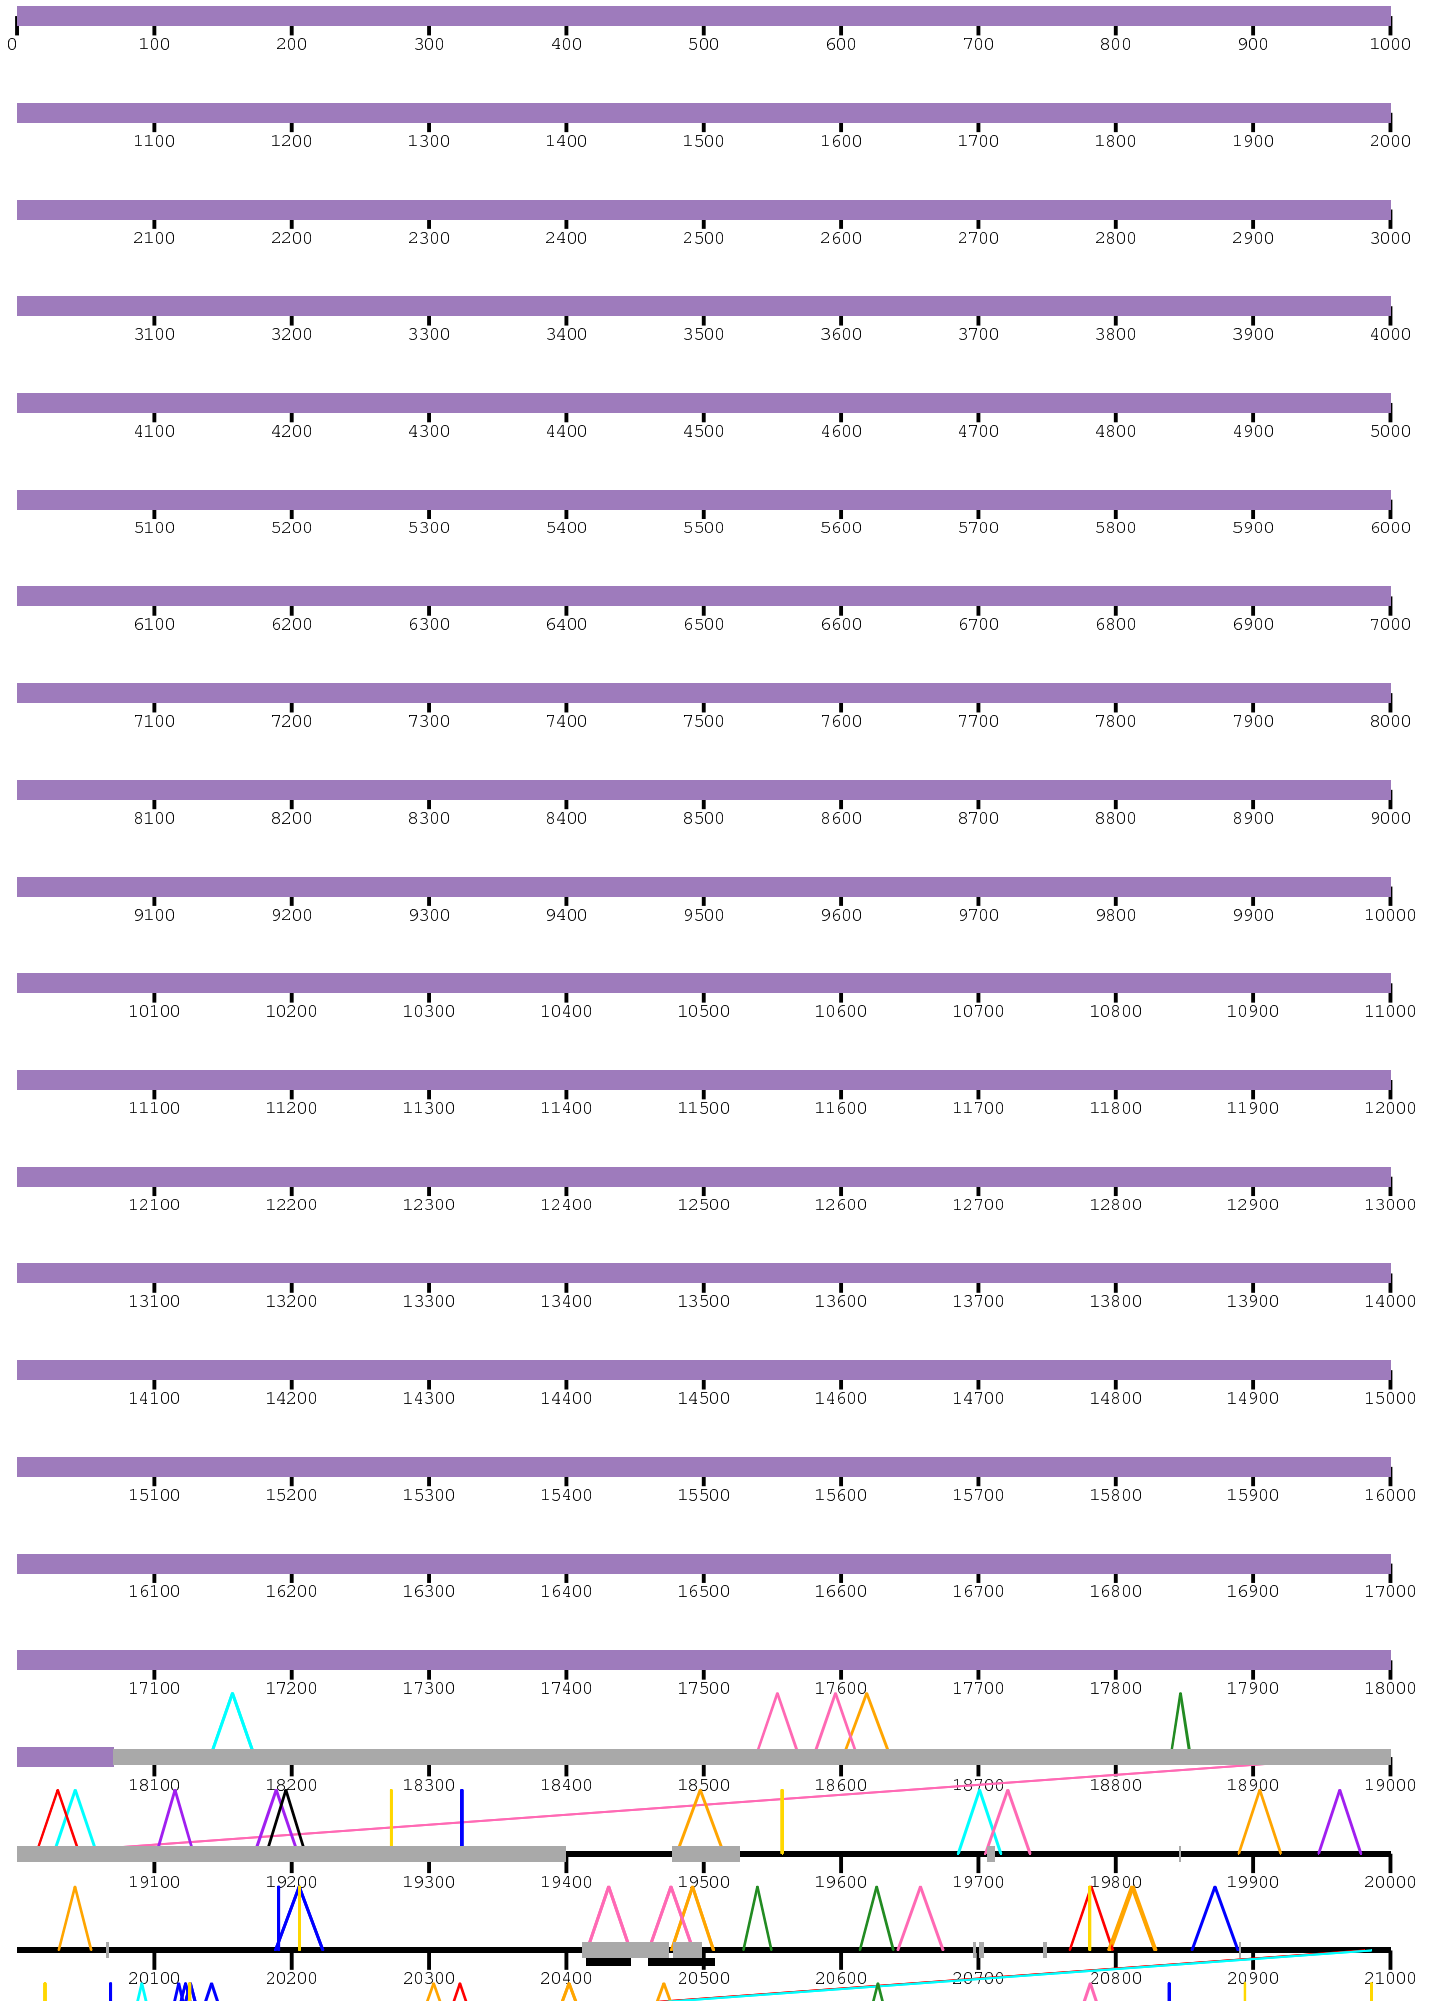

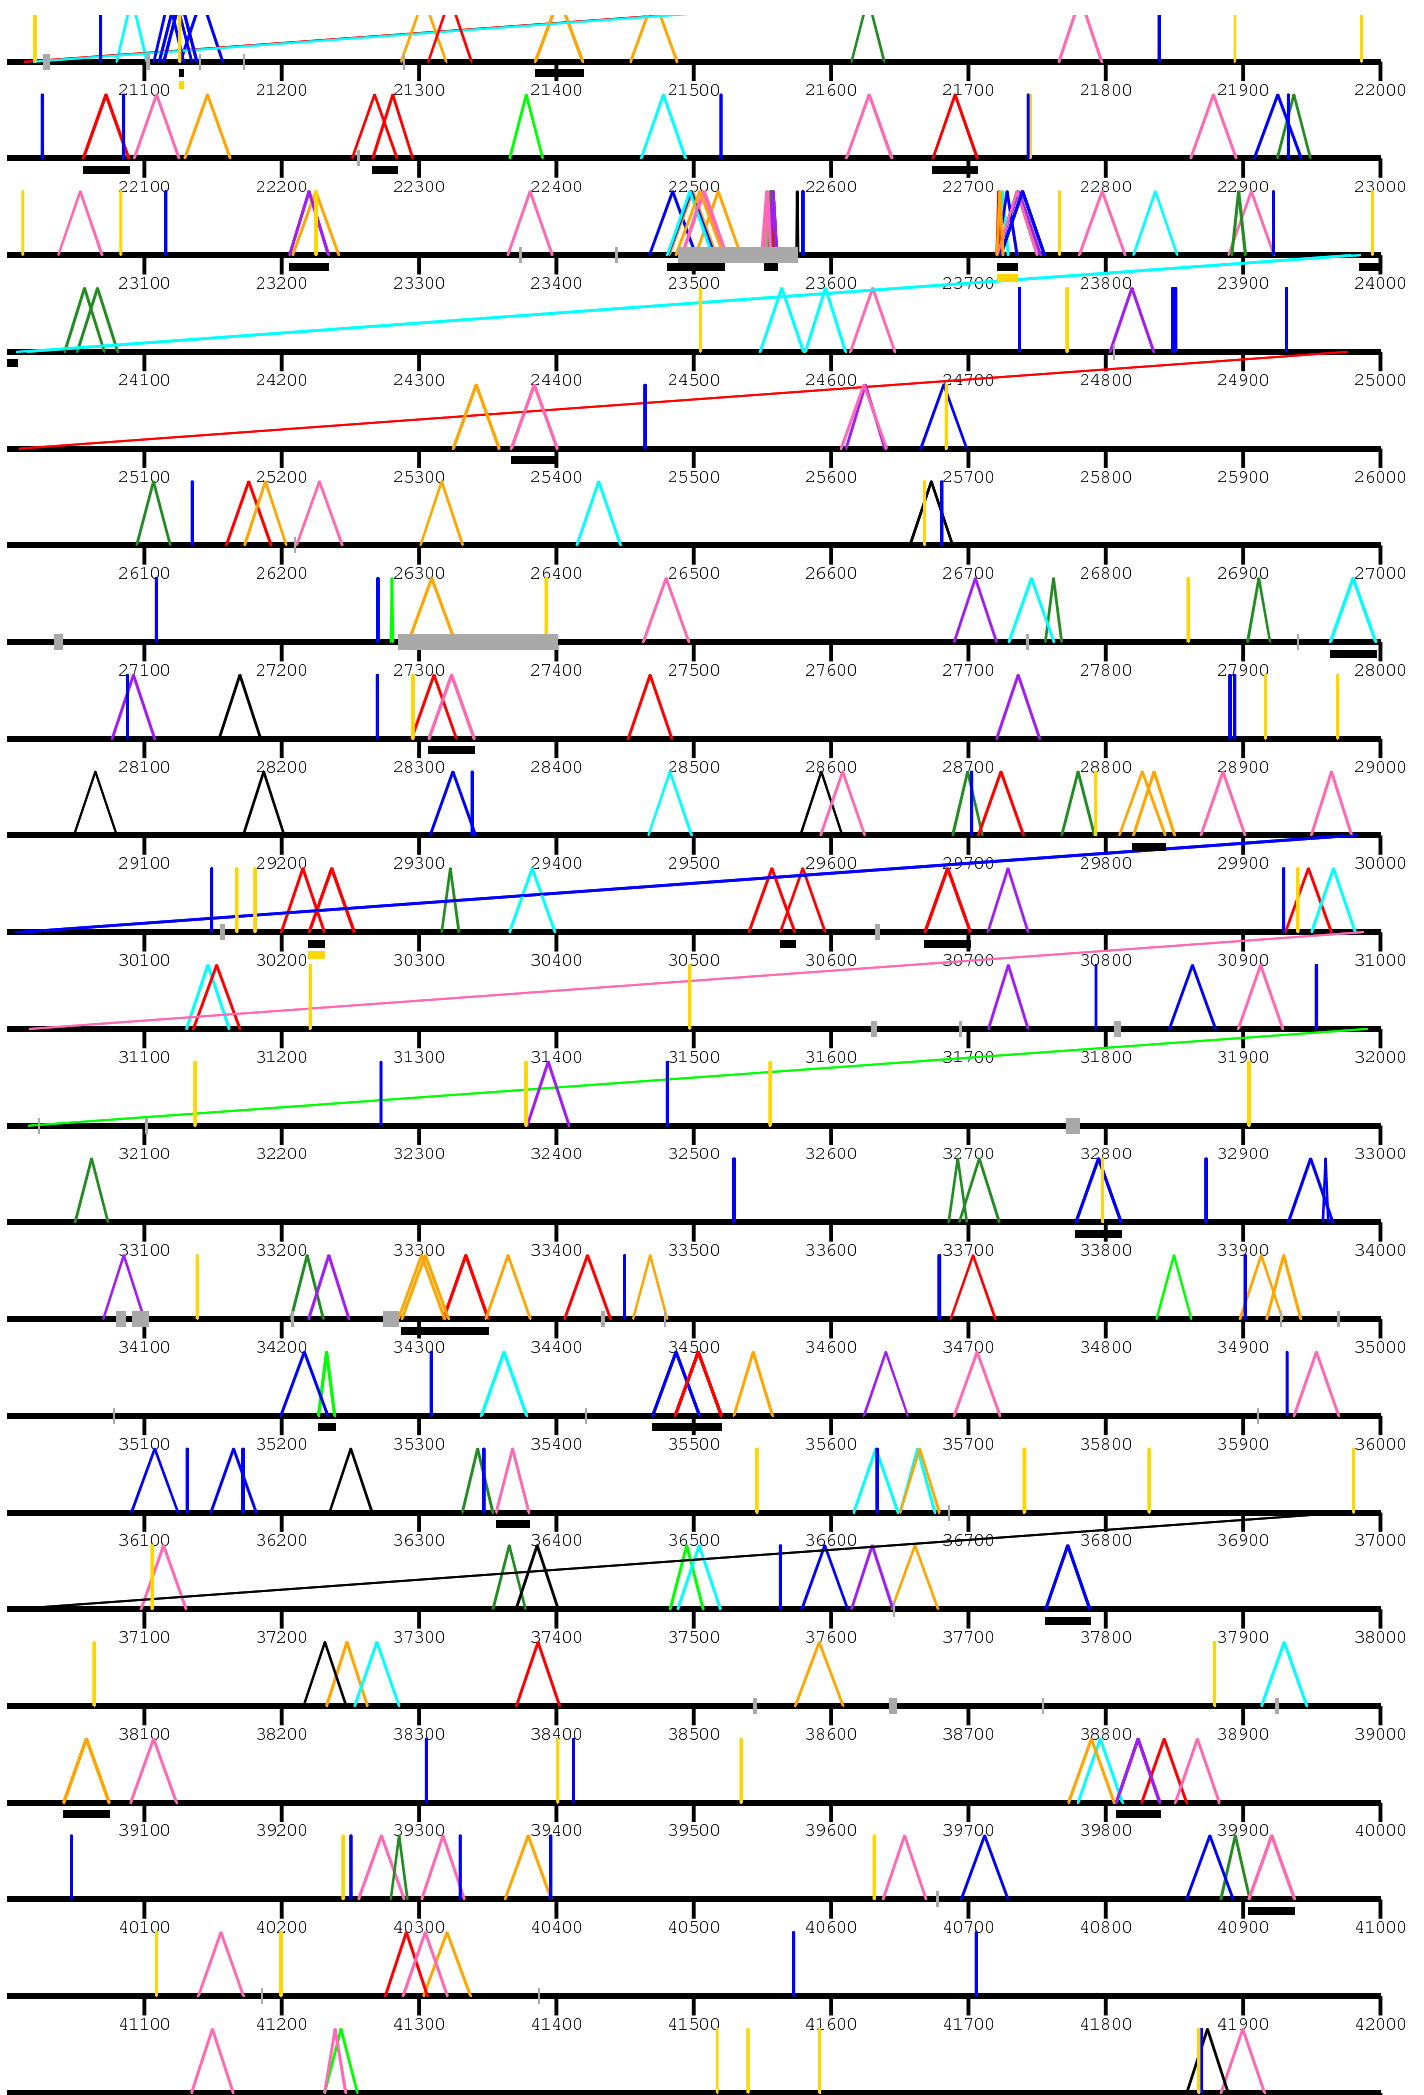

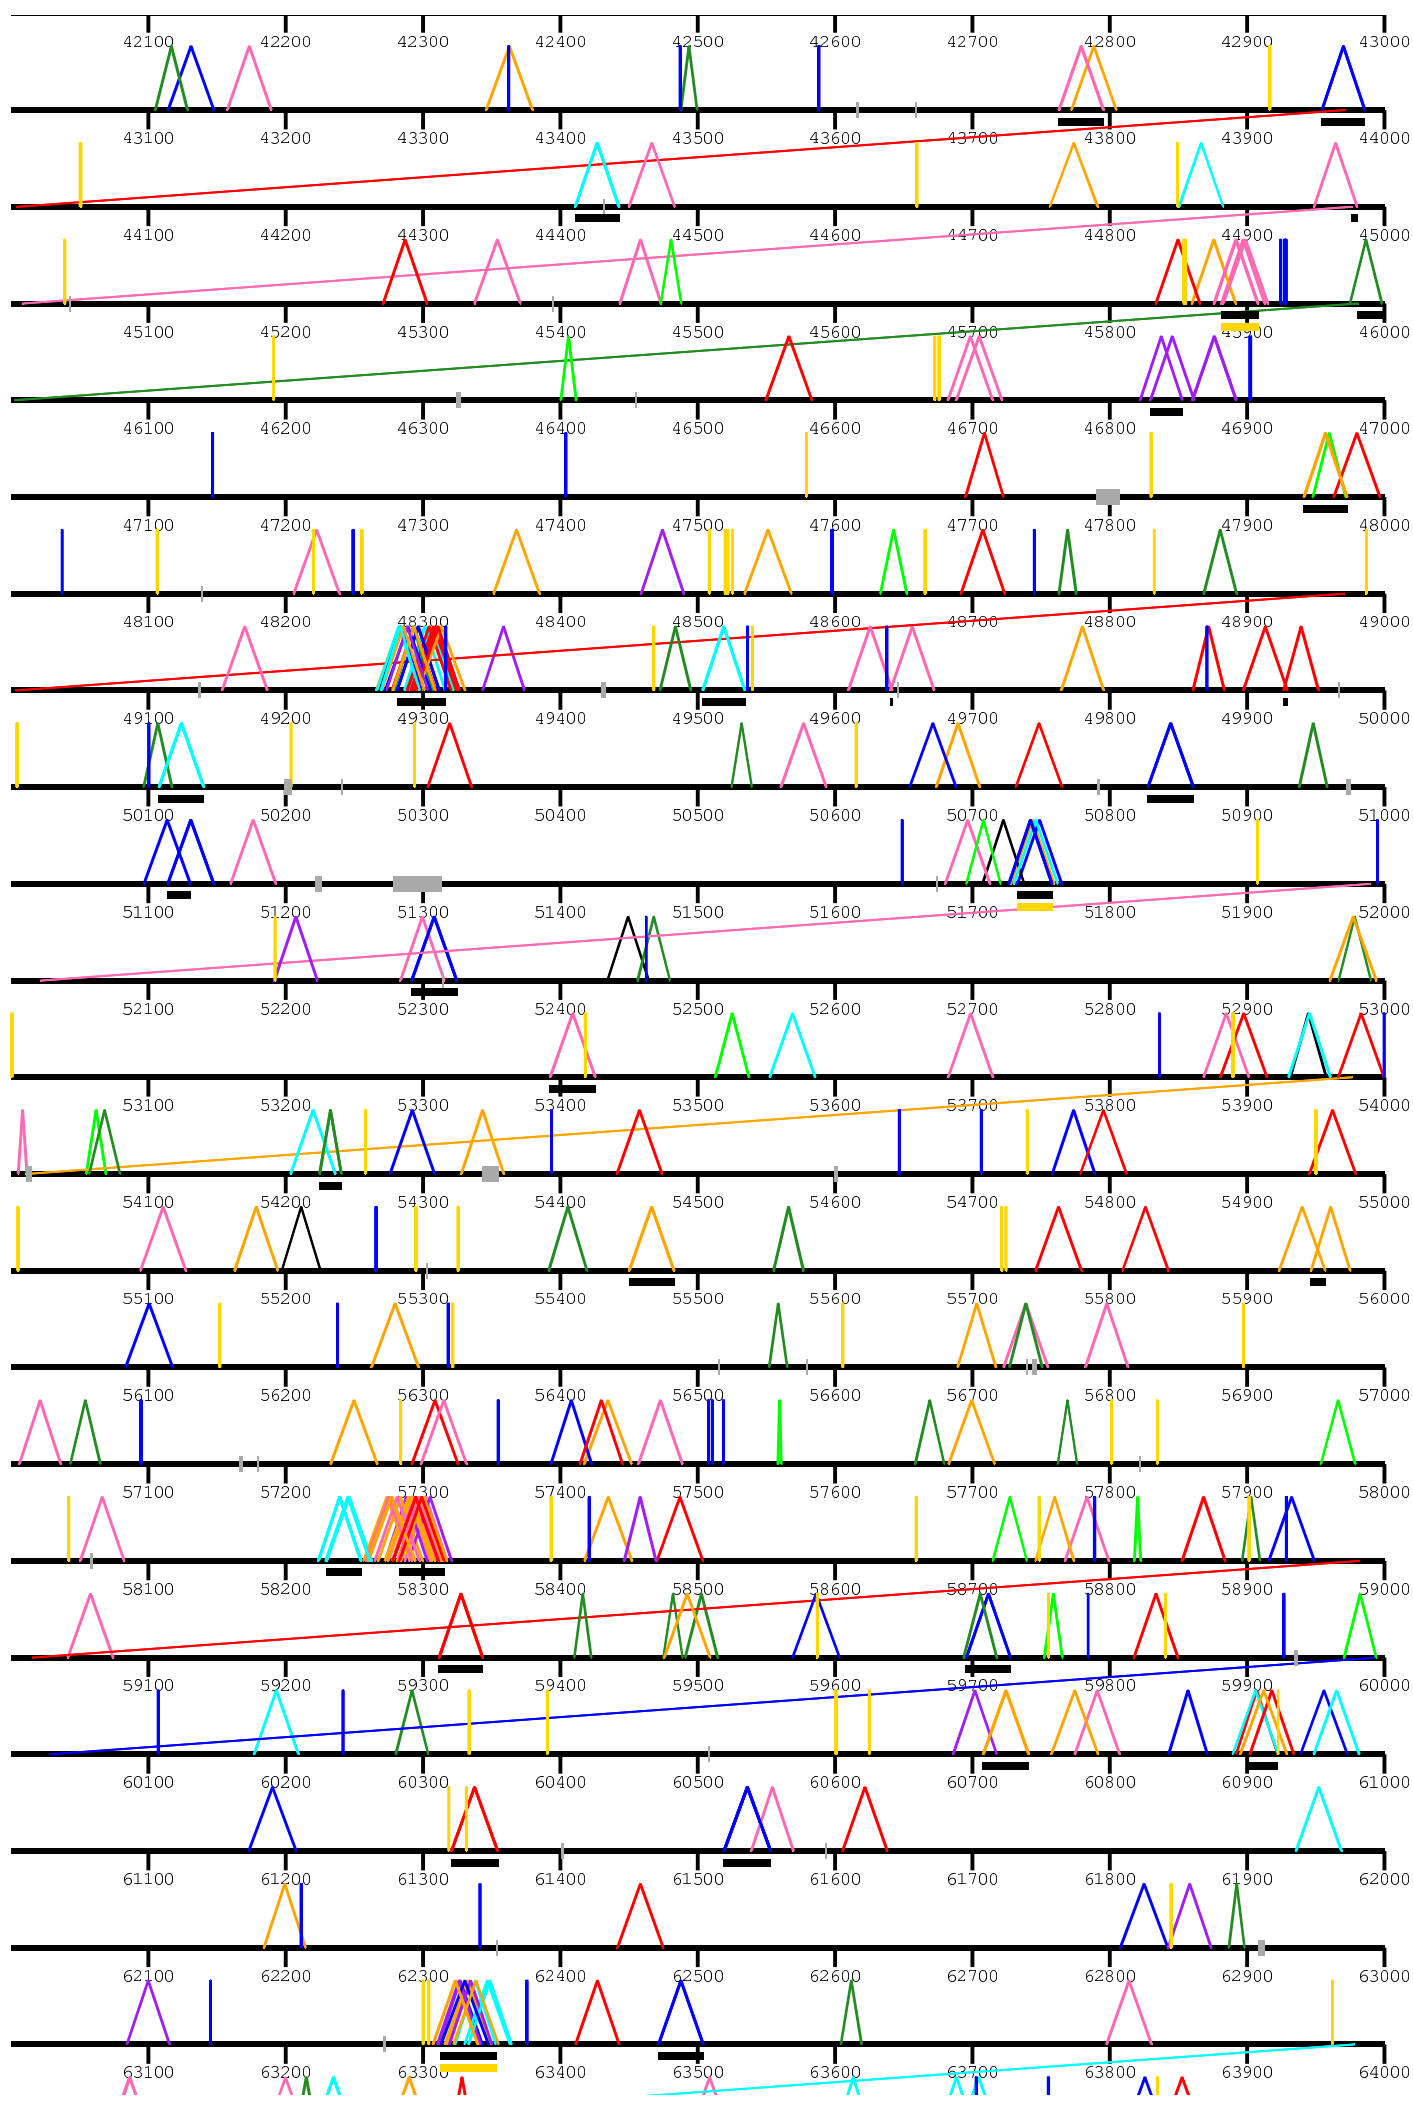



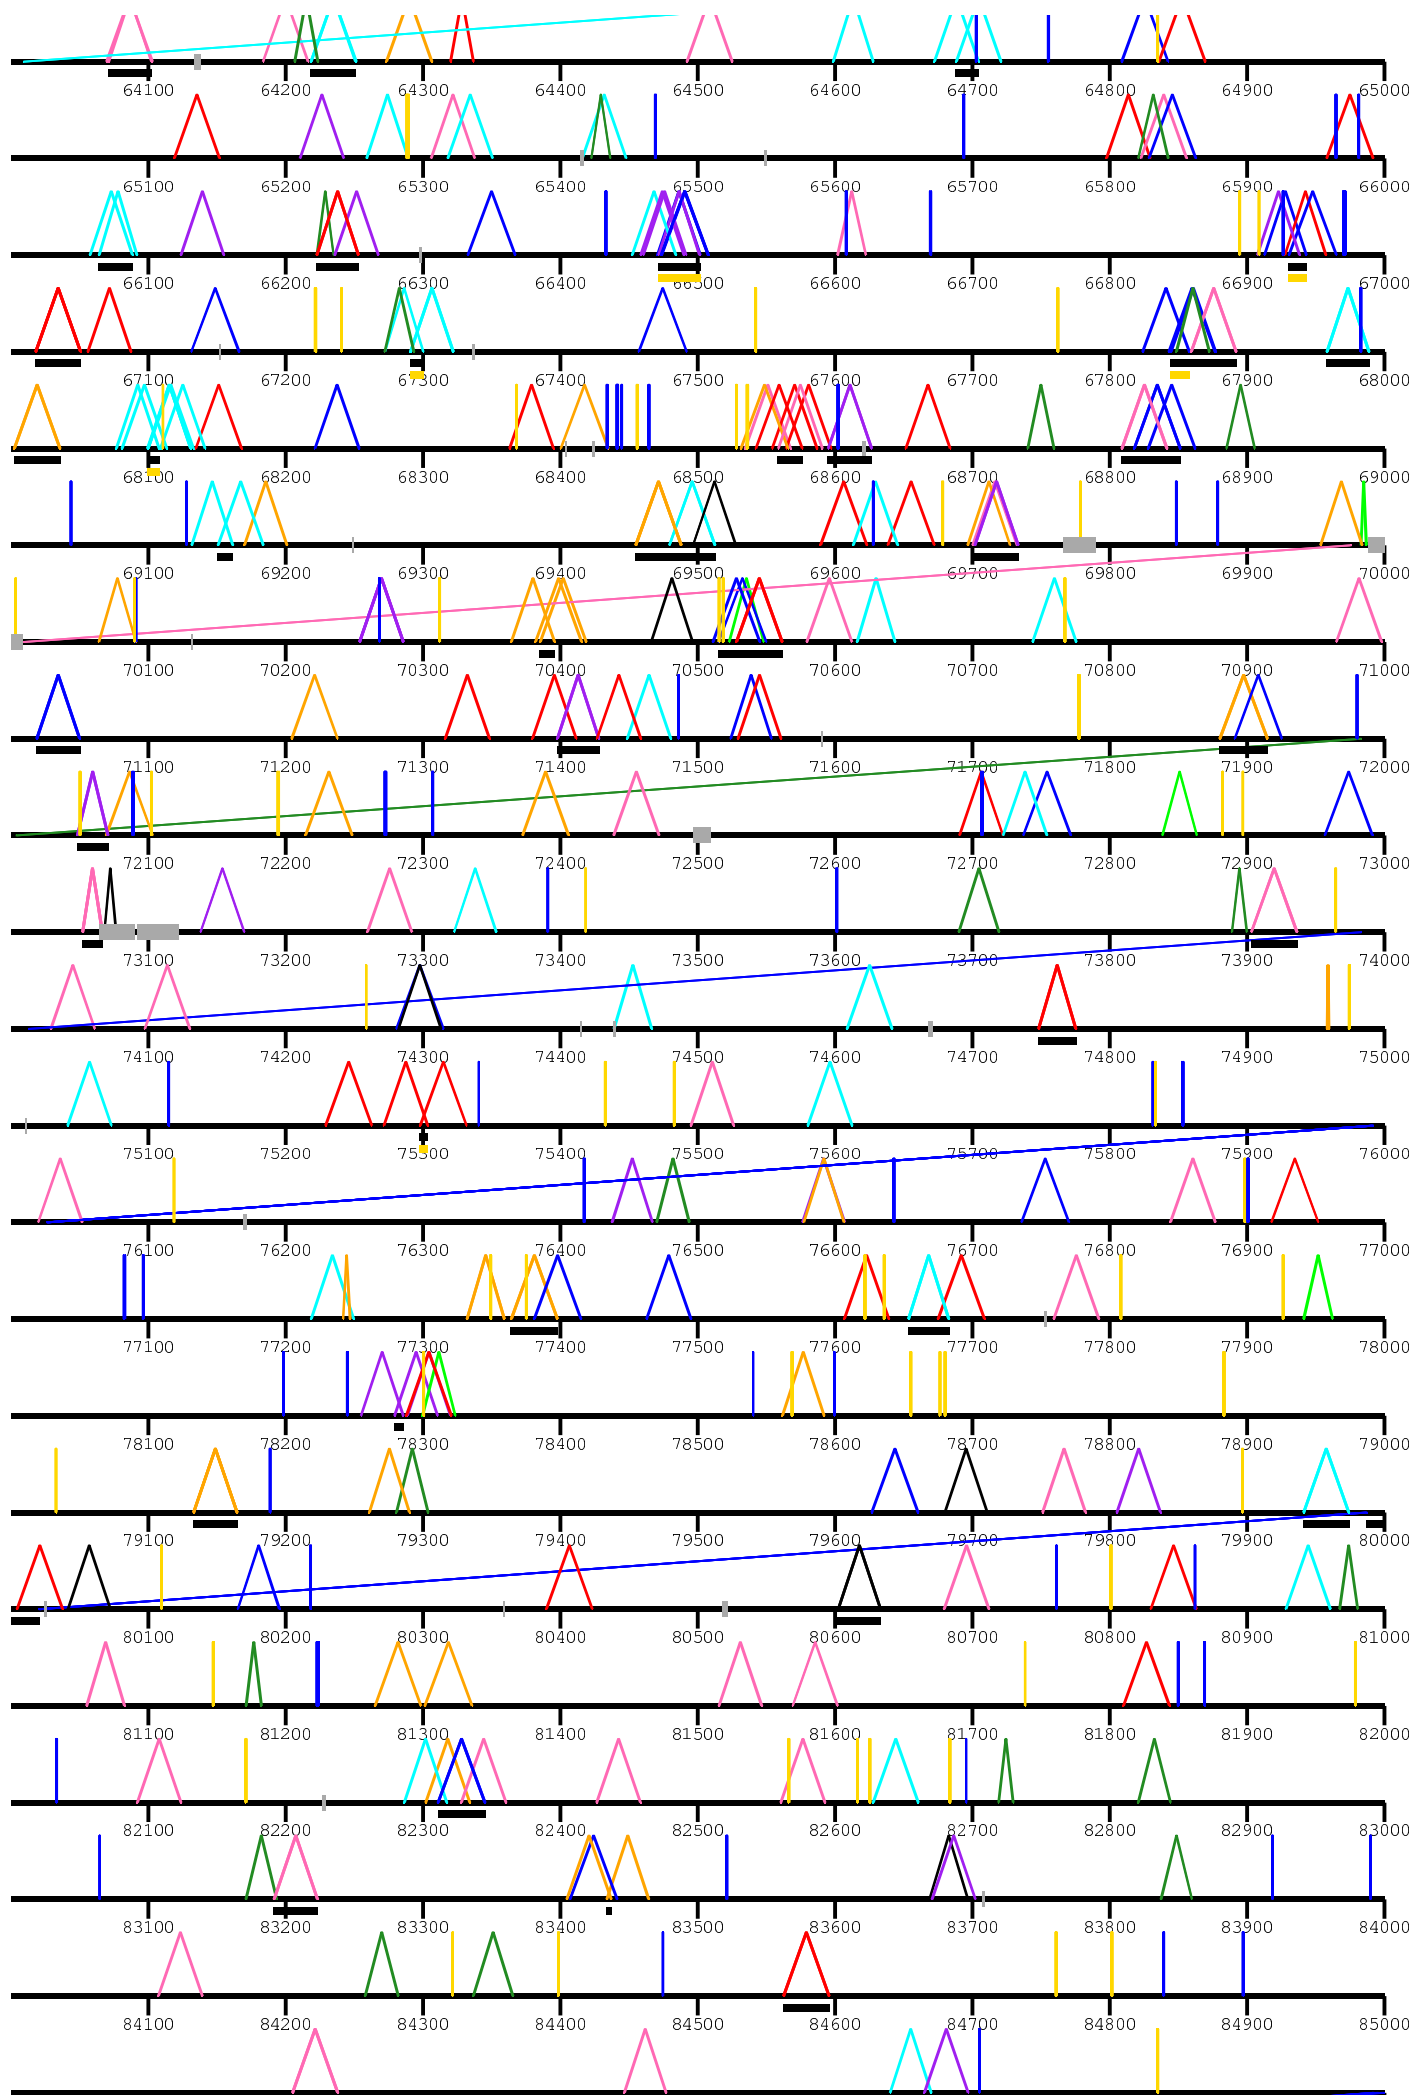

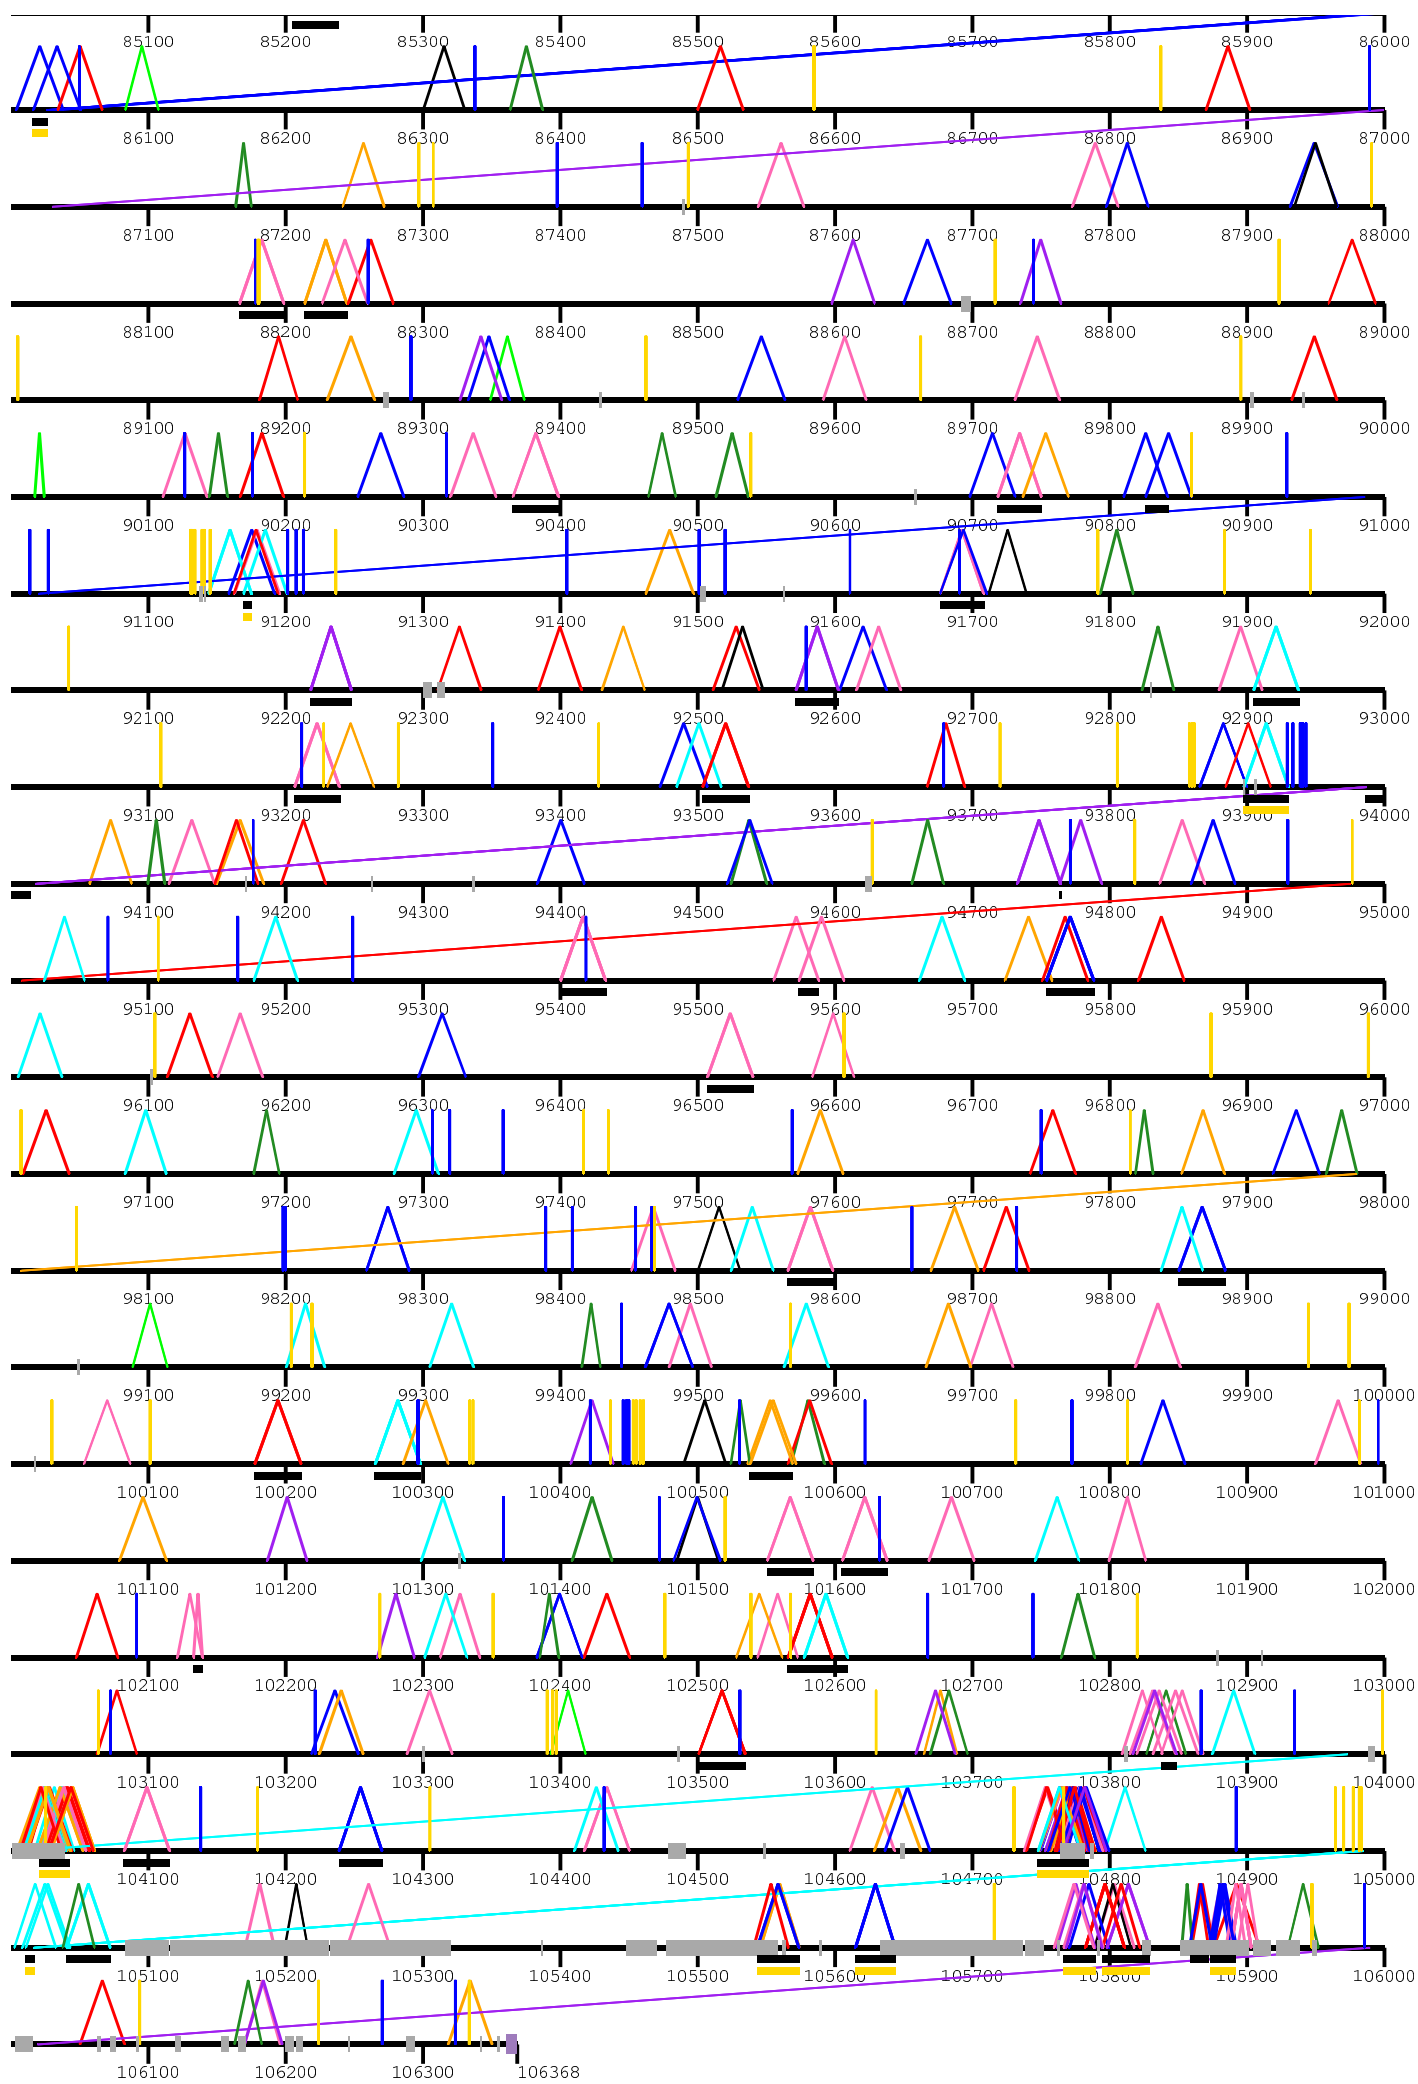

chr15

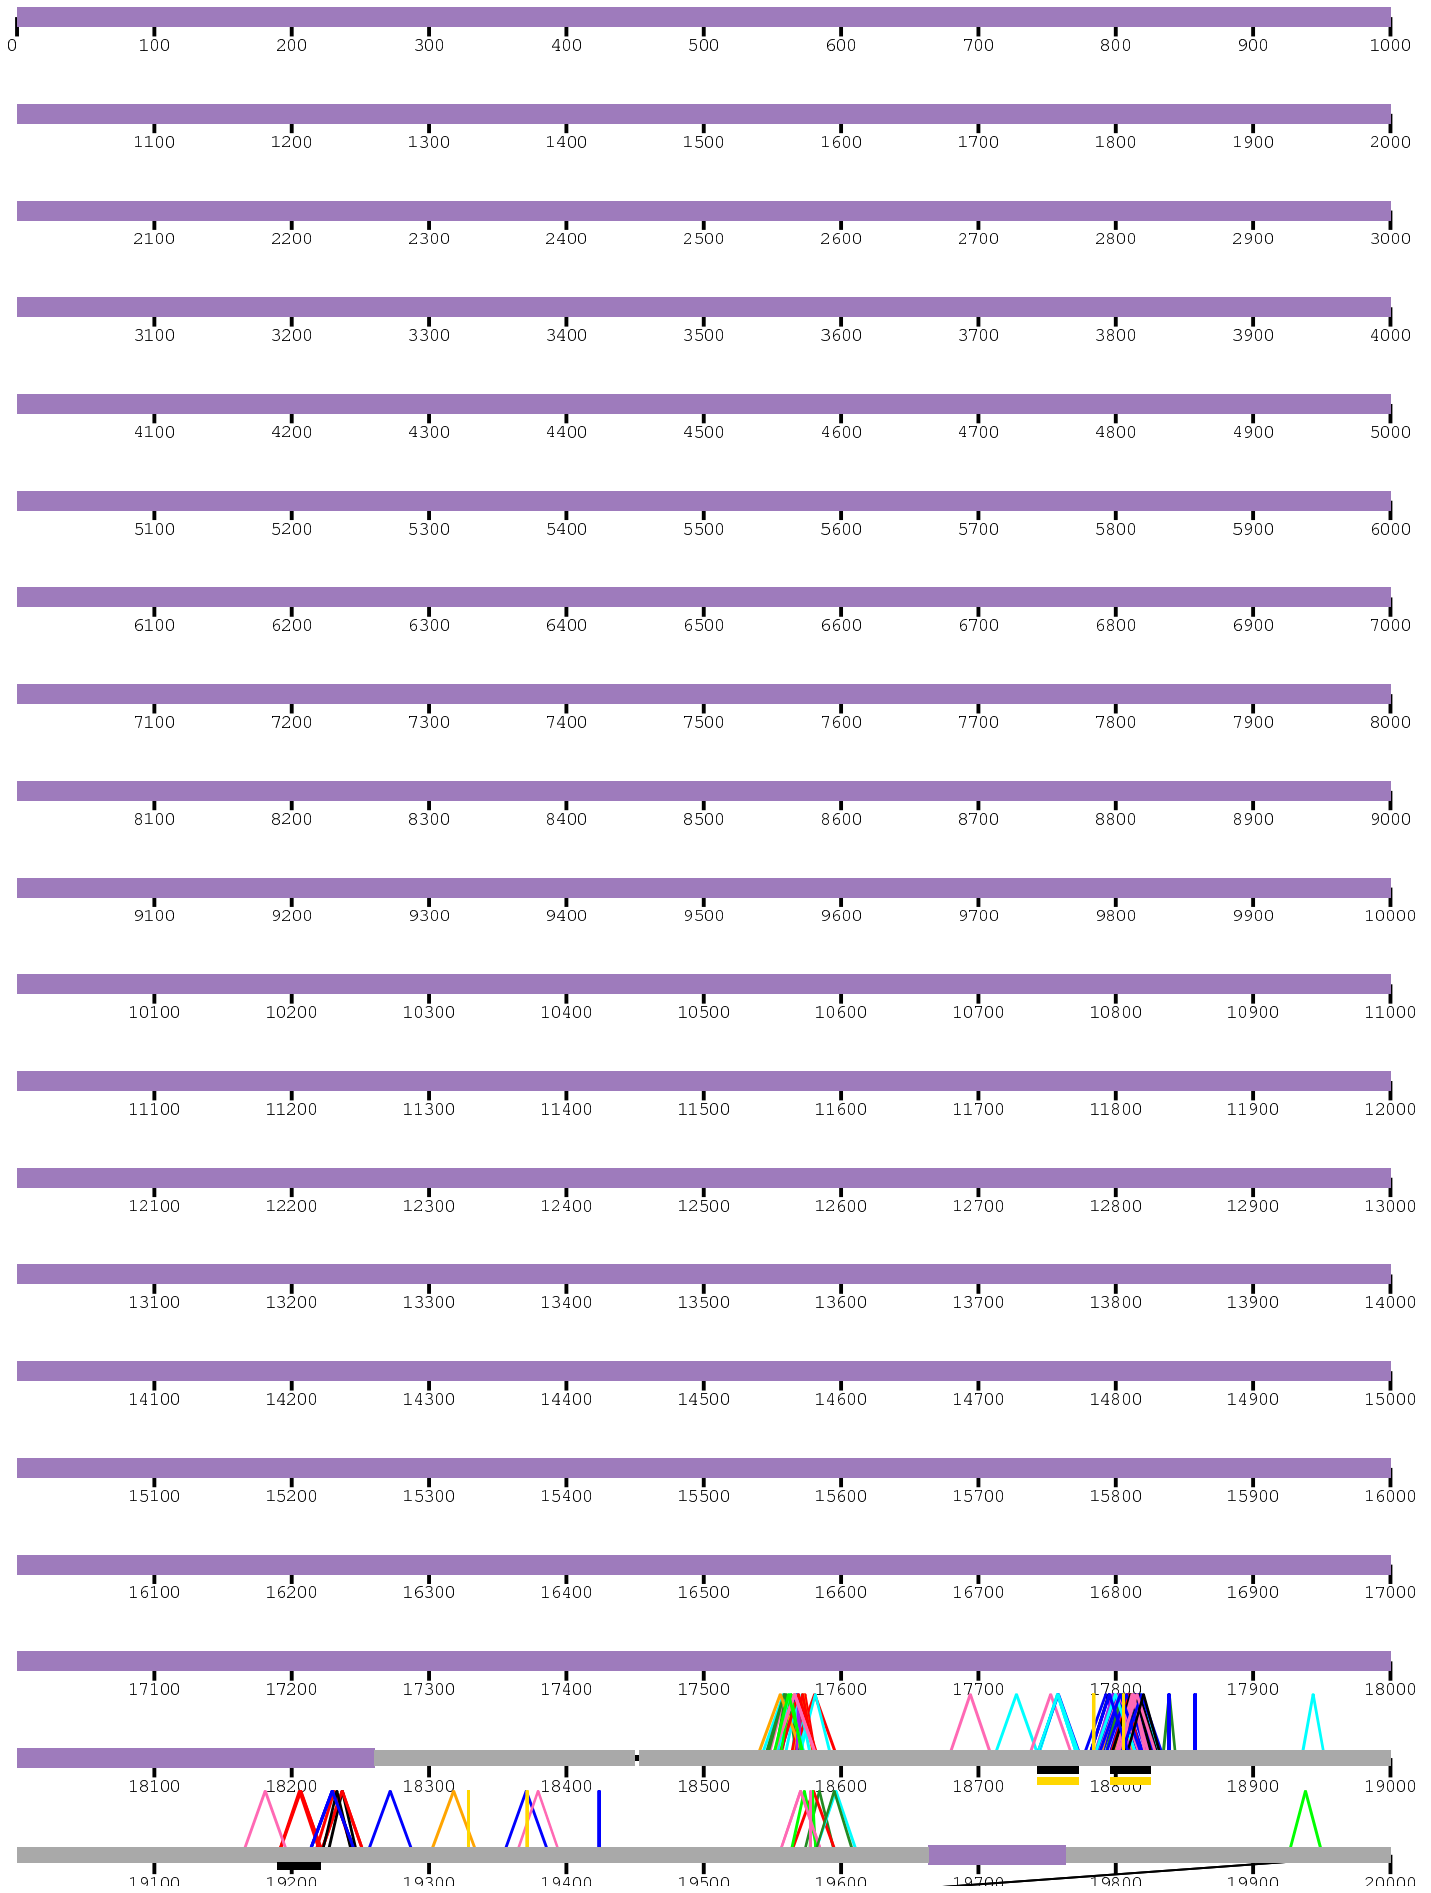

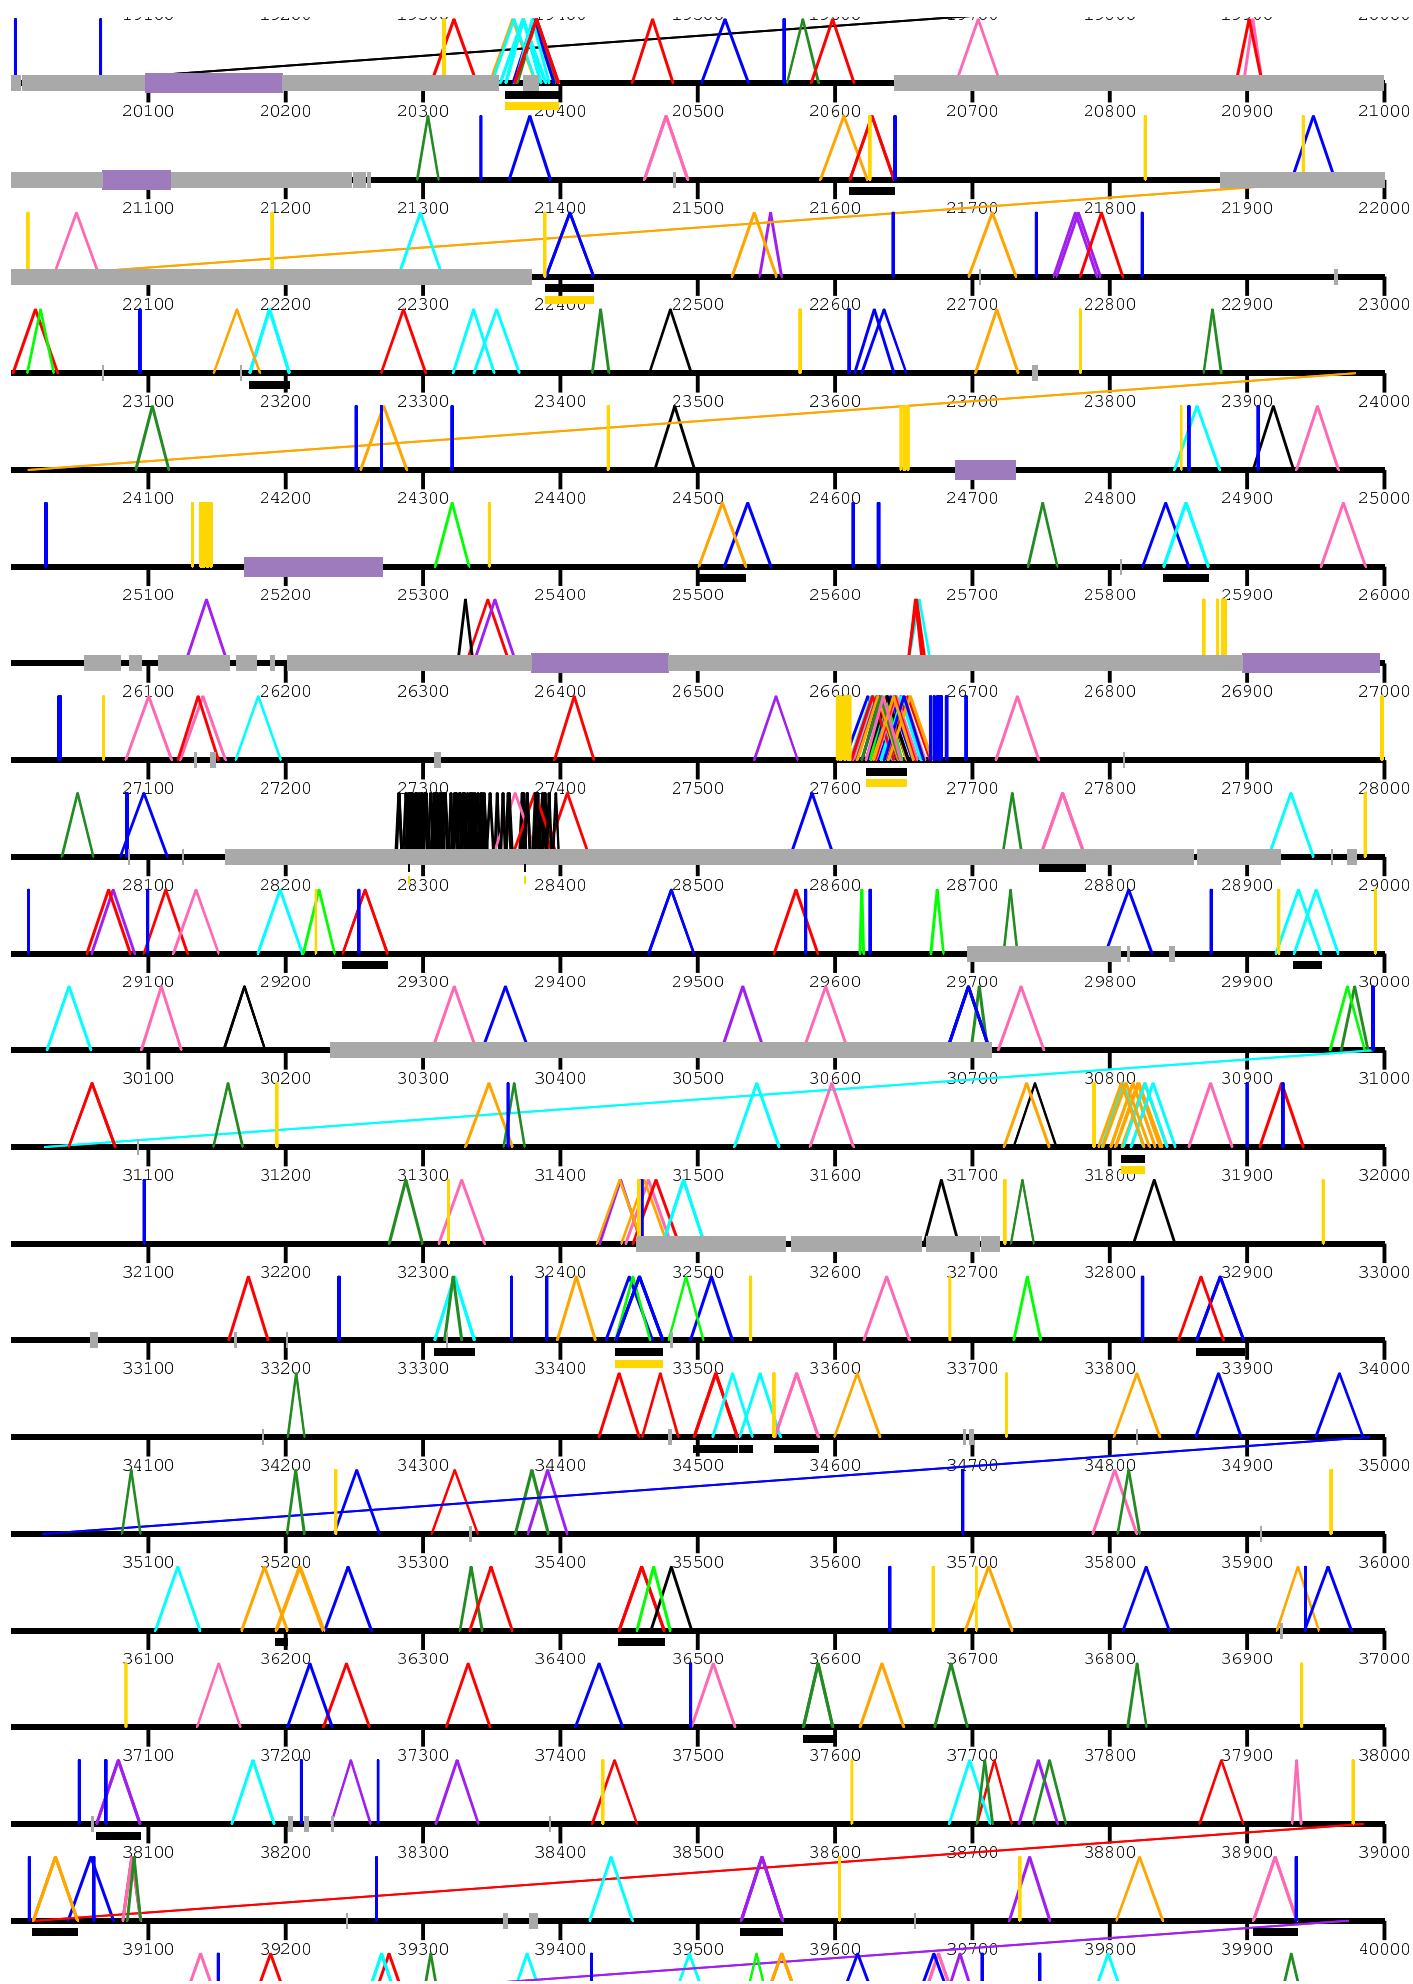

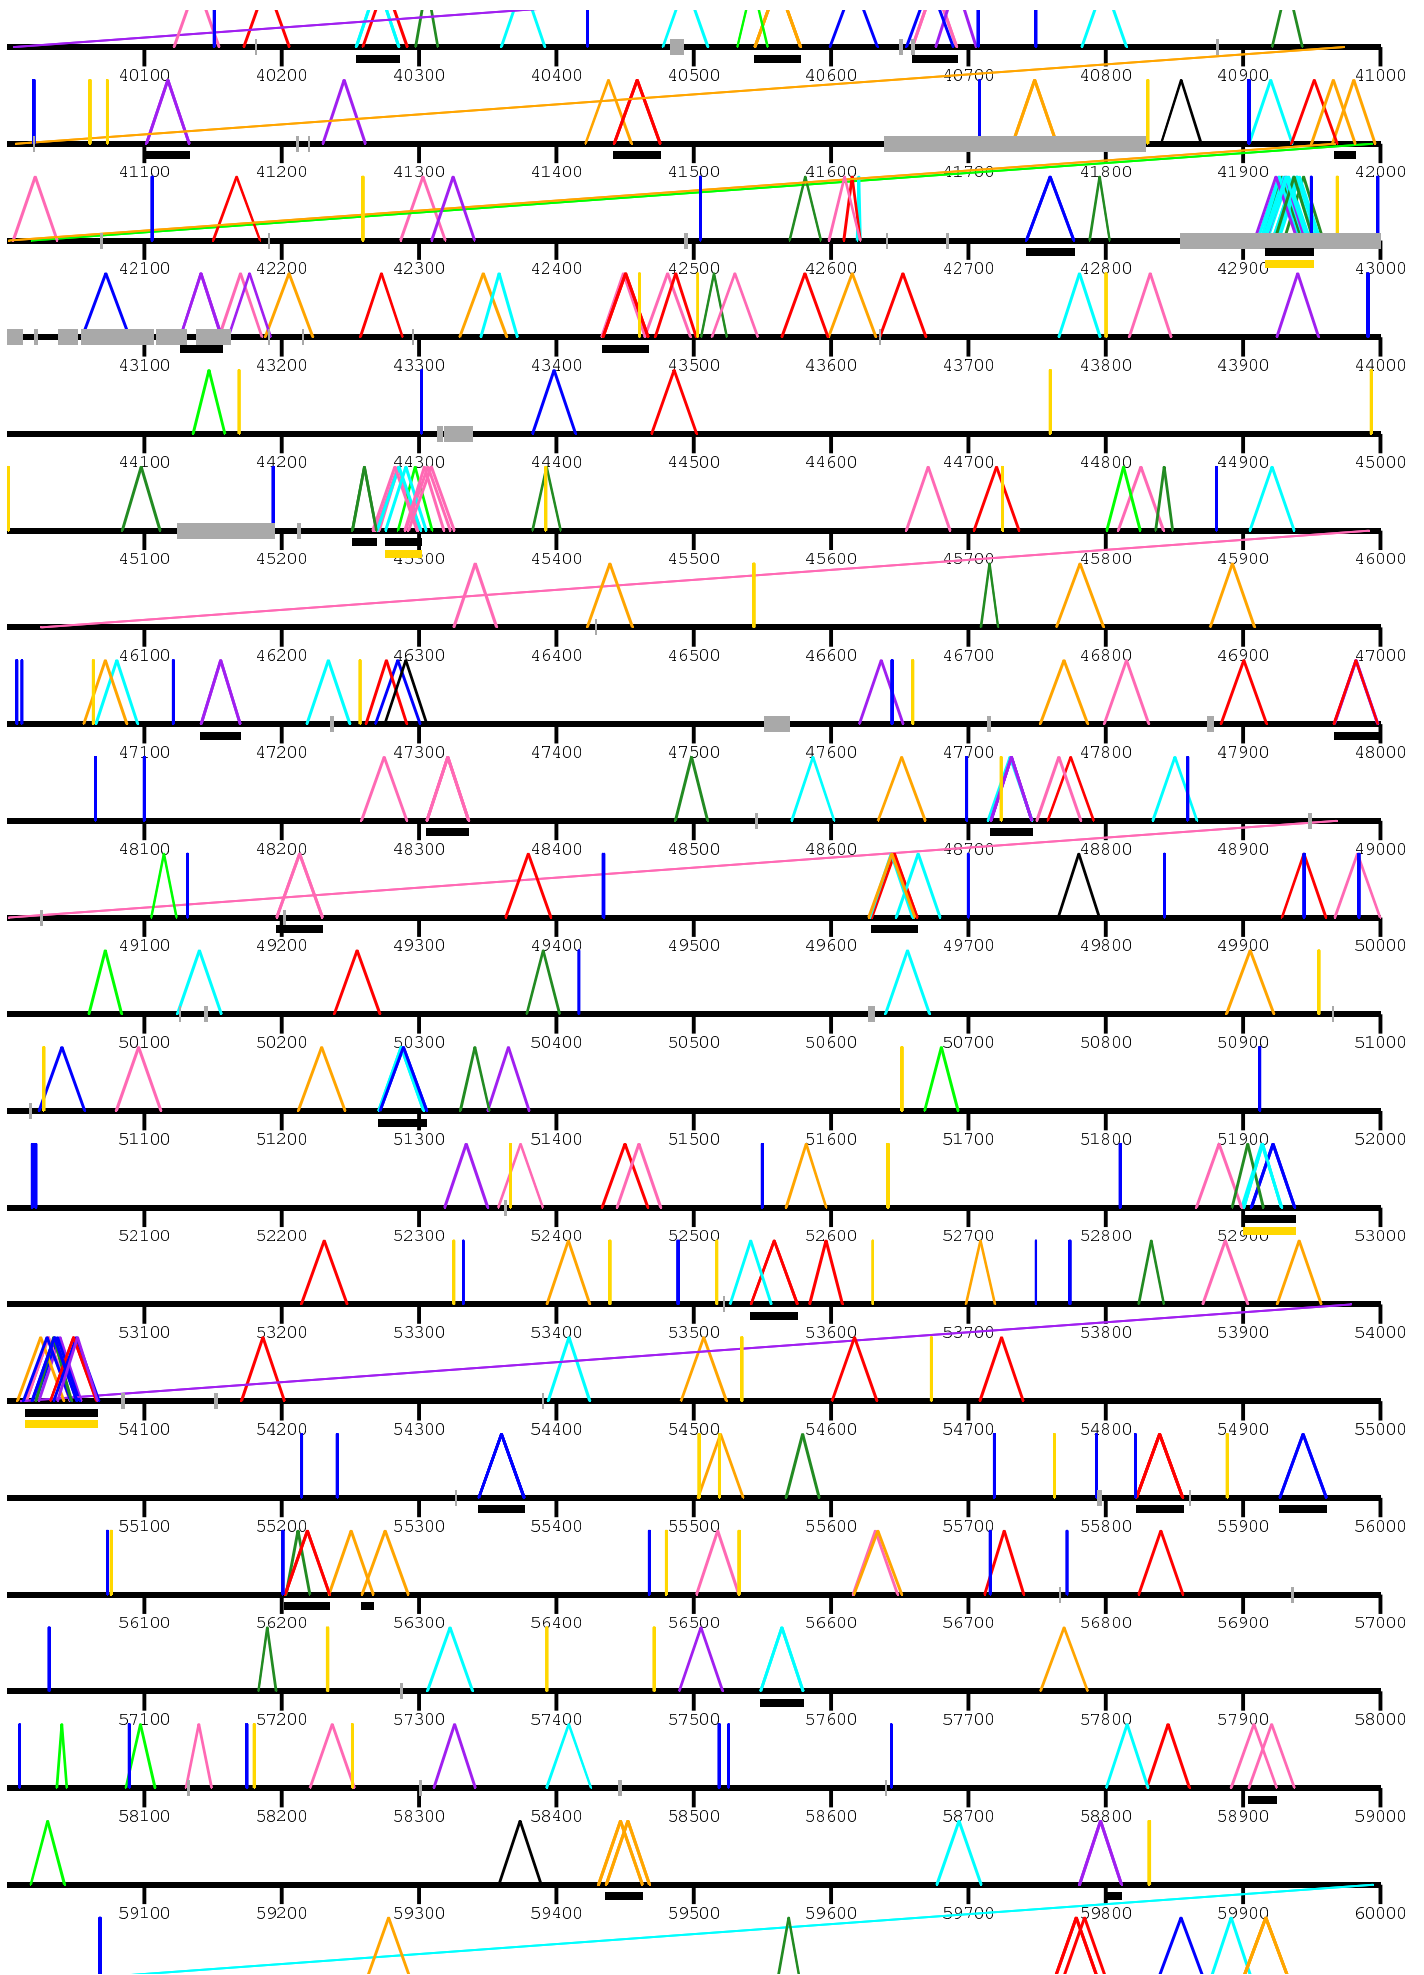

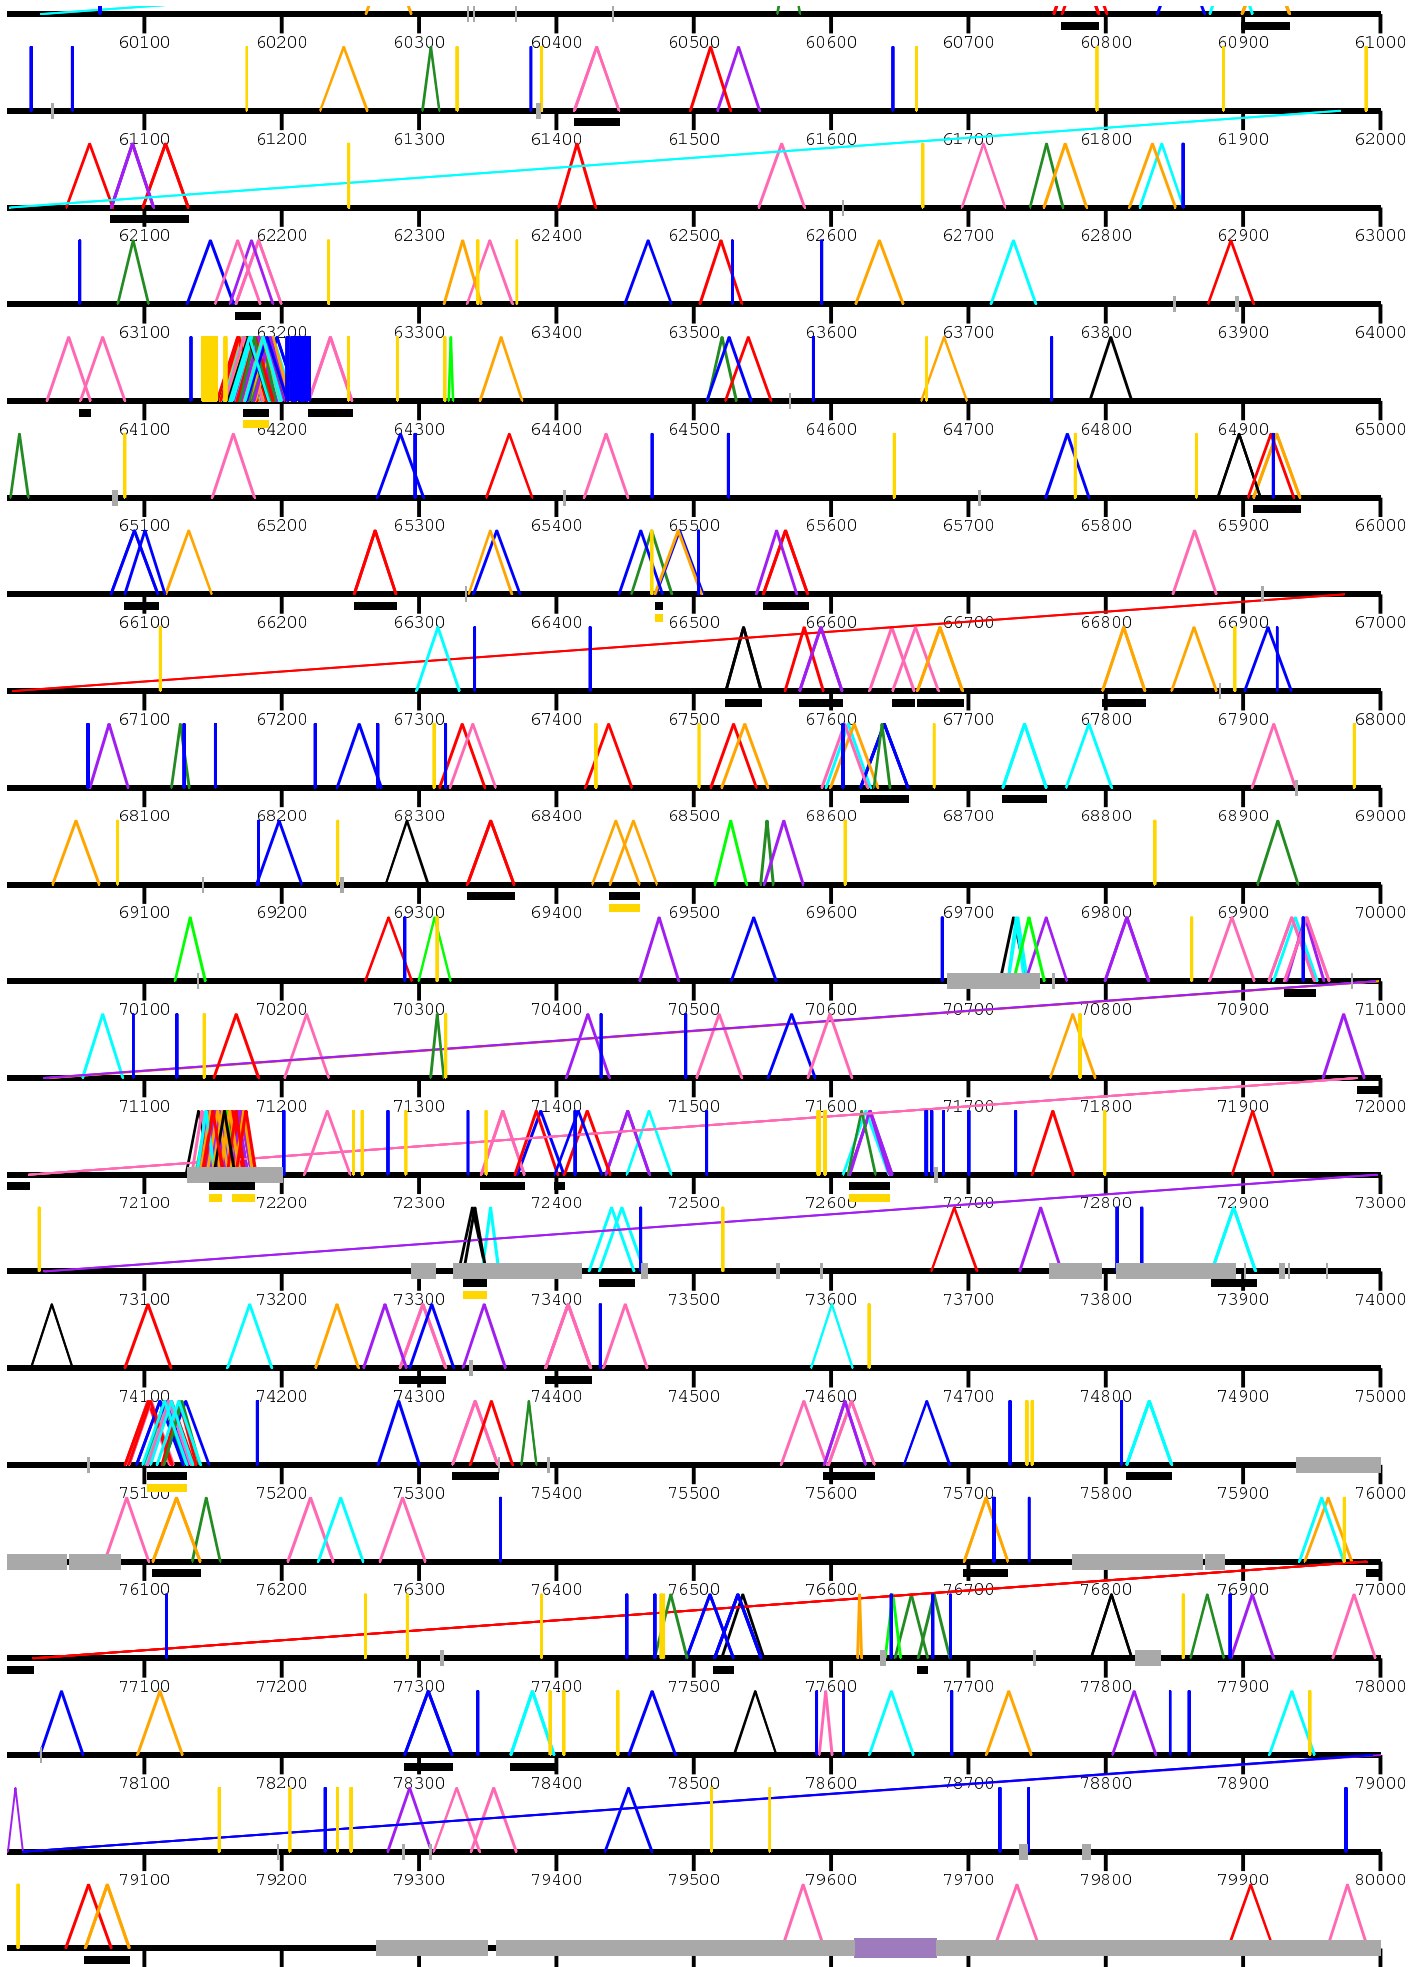

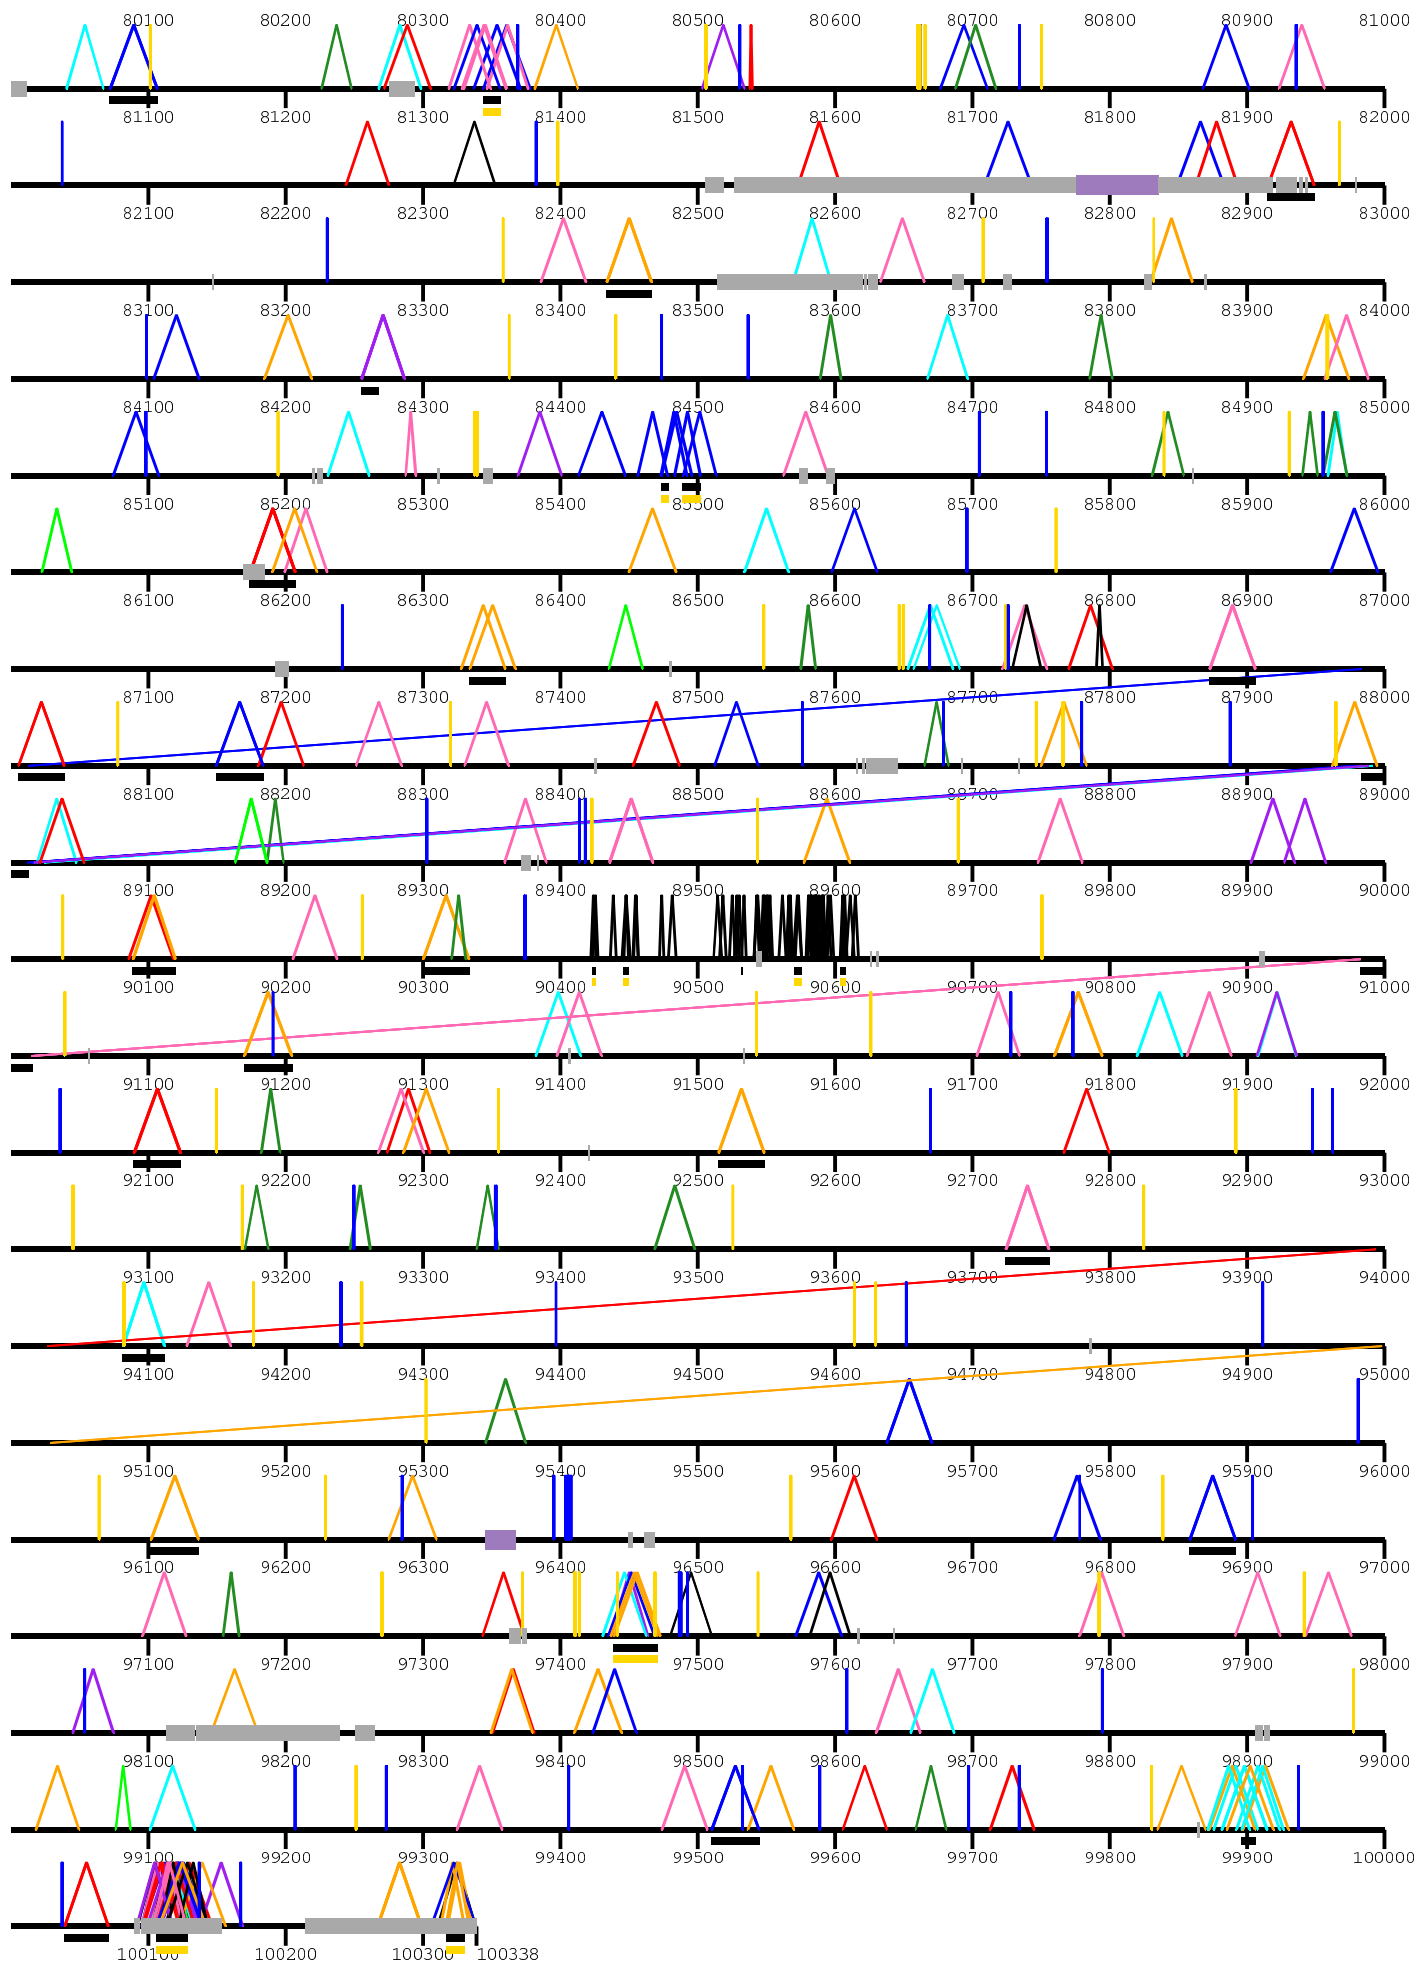

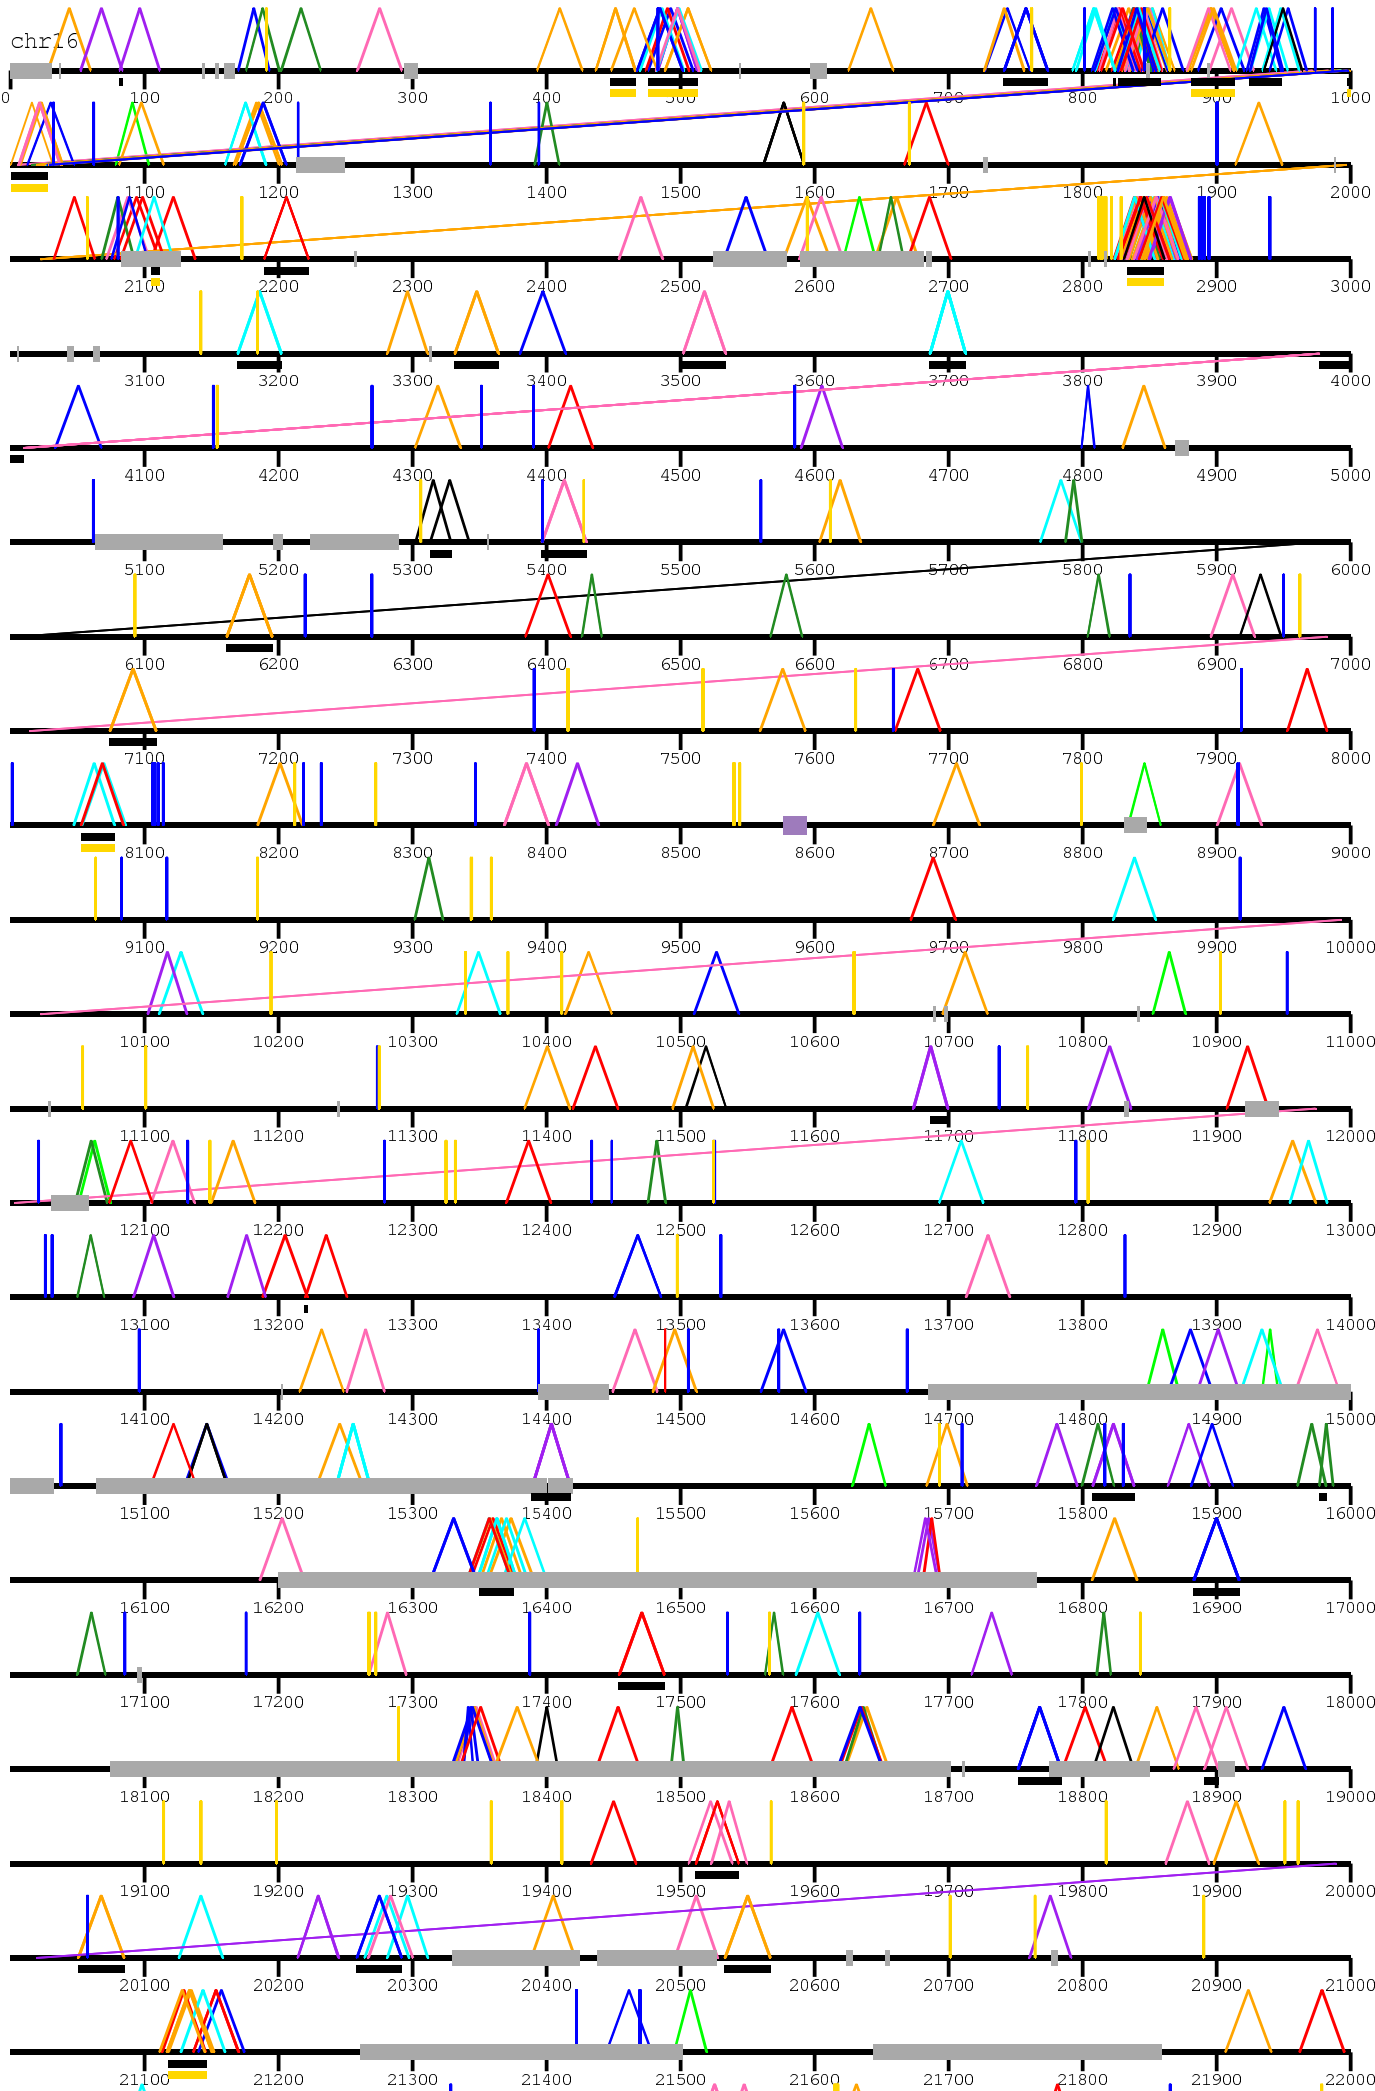



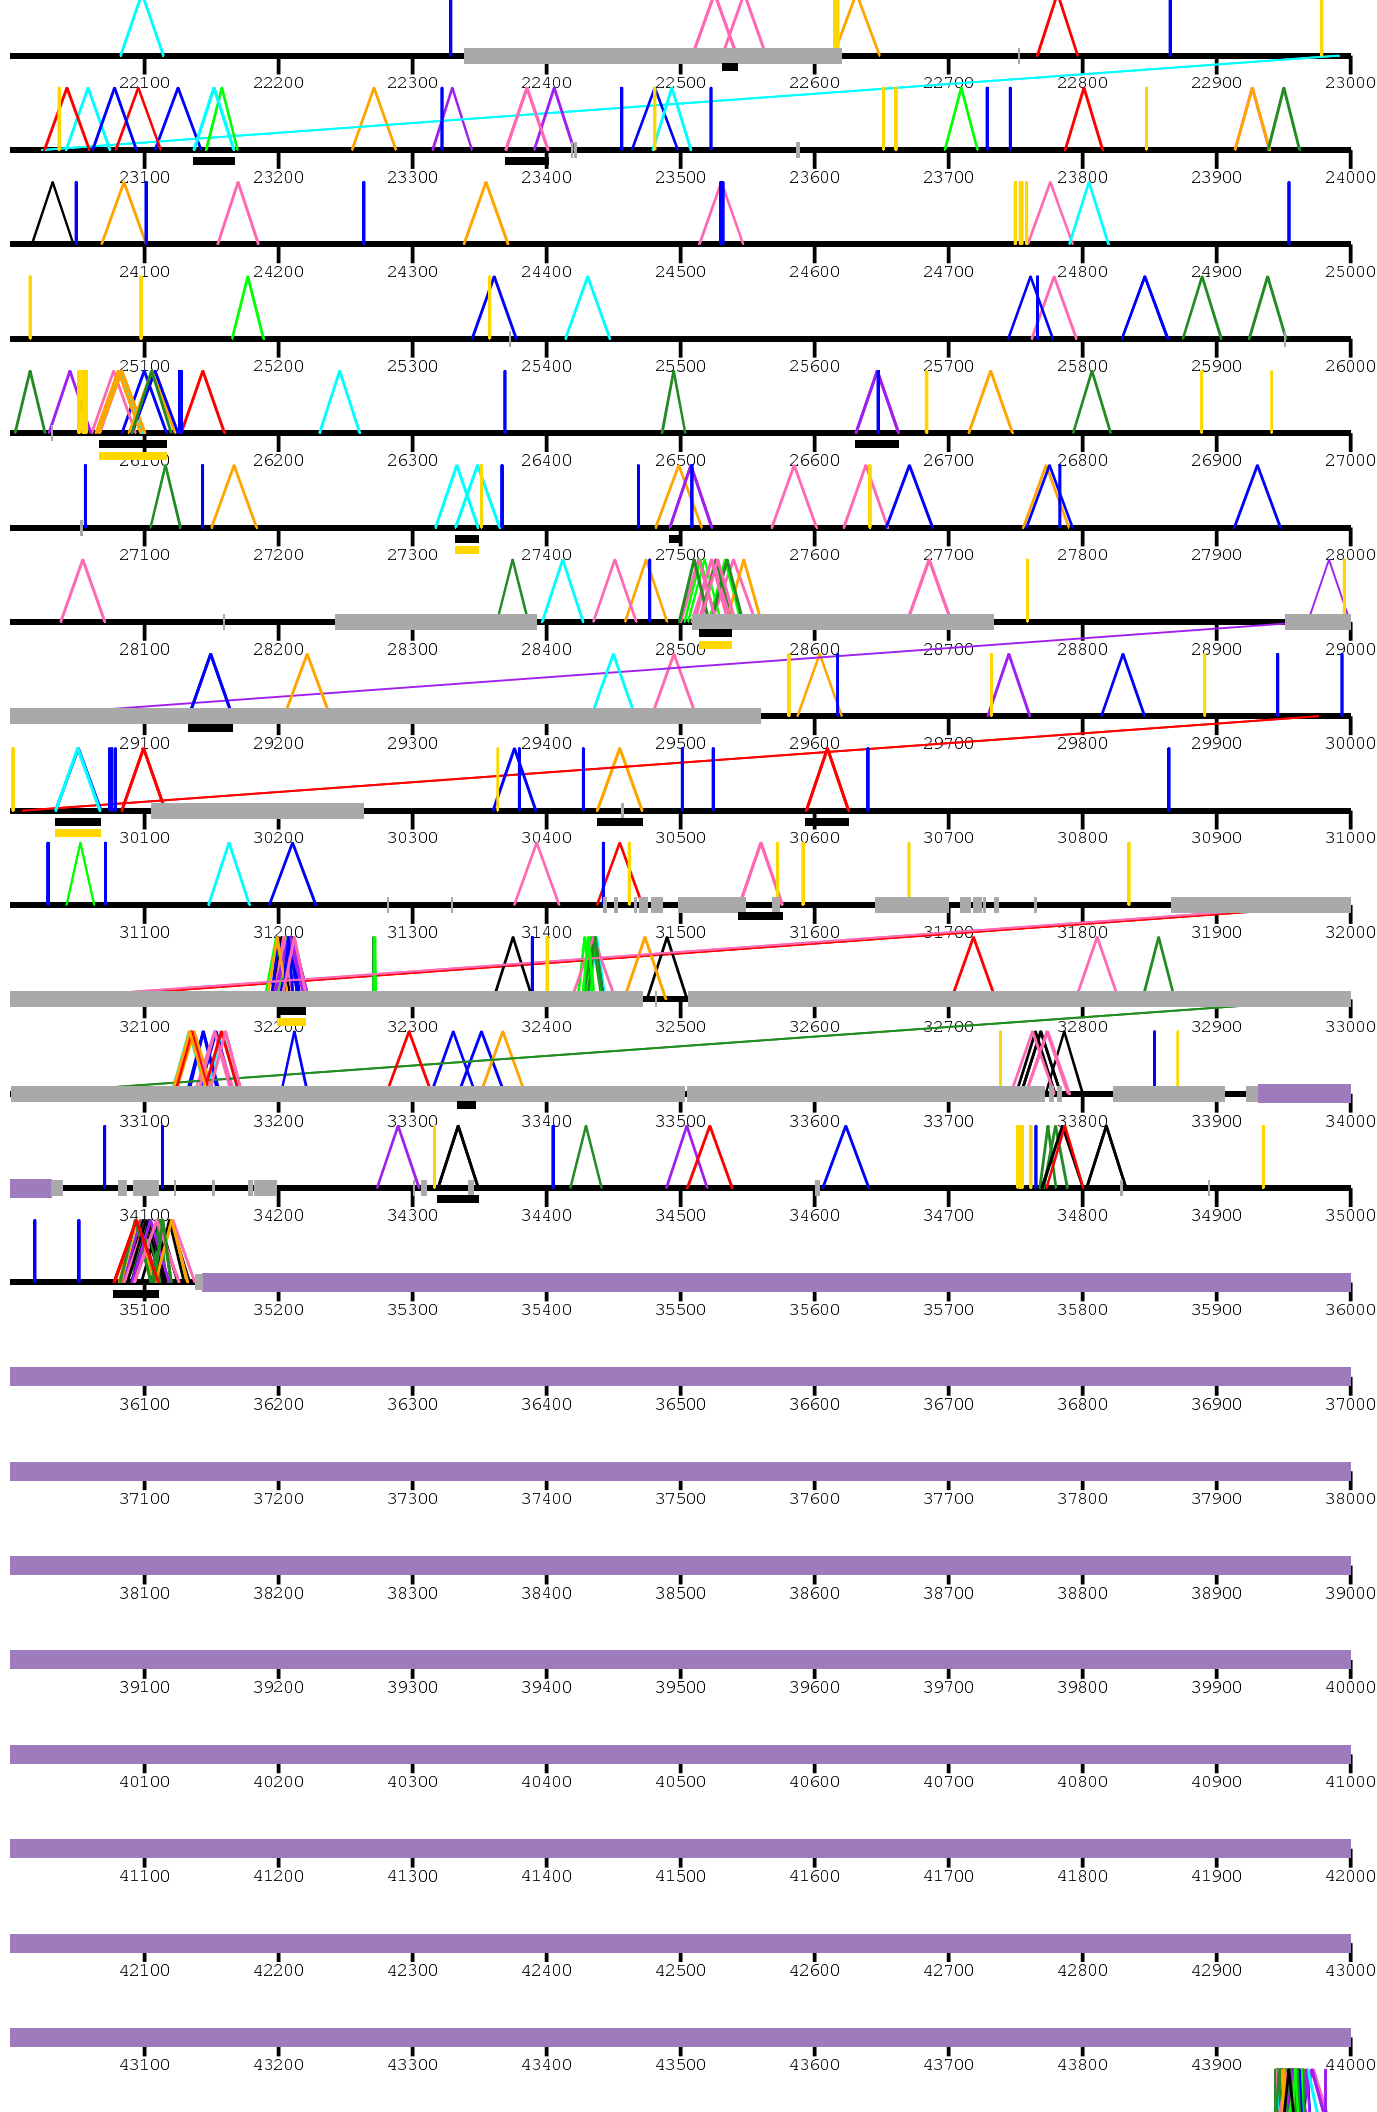

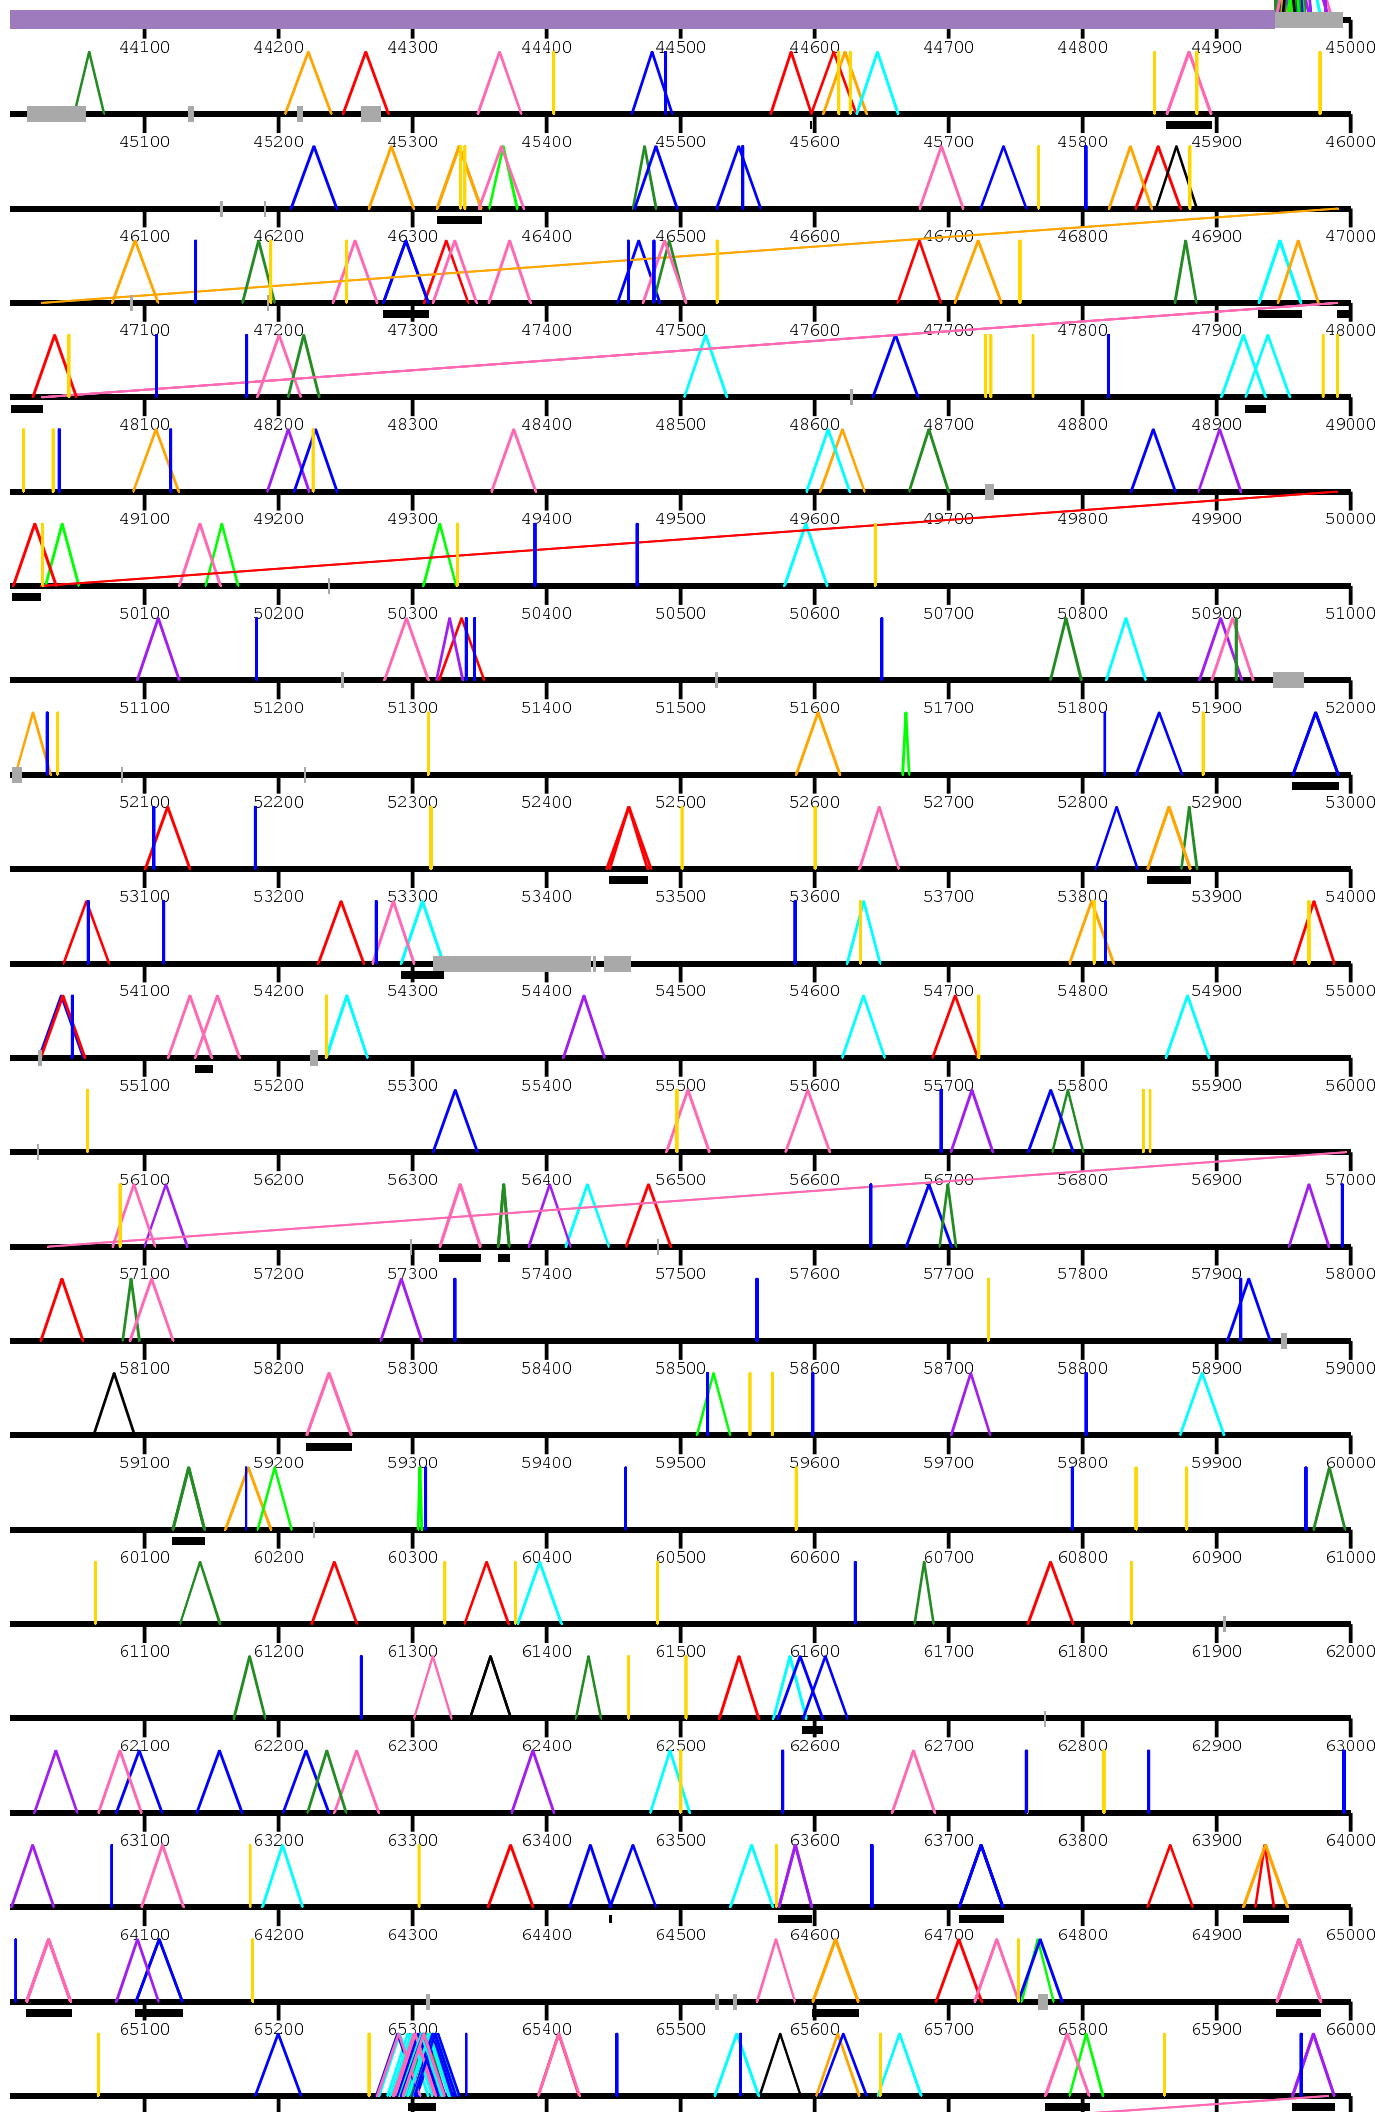

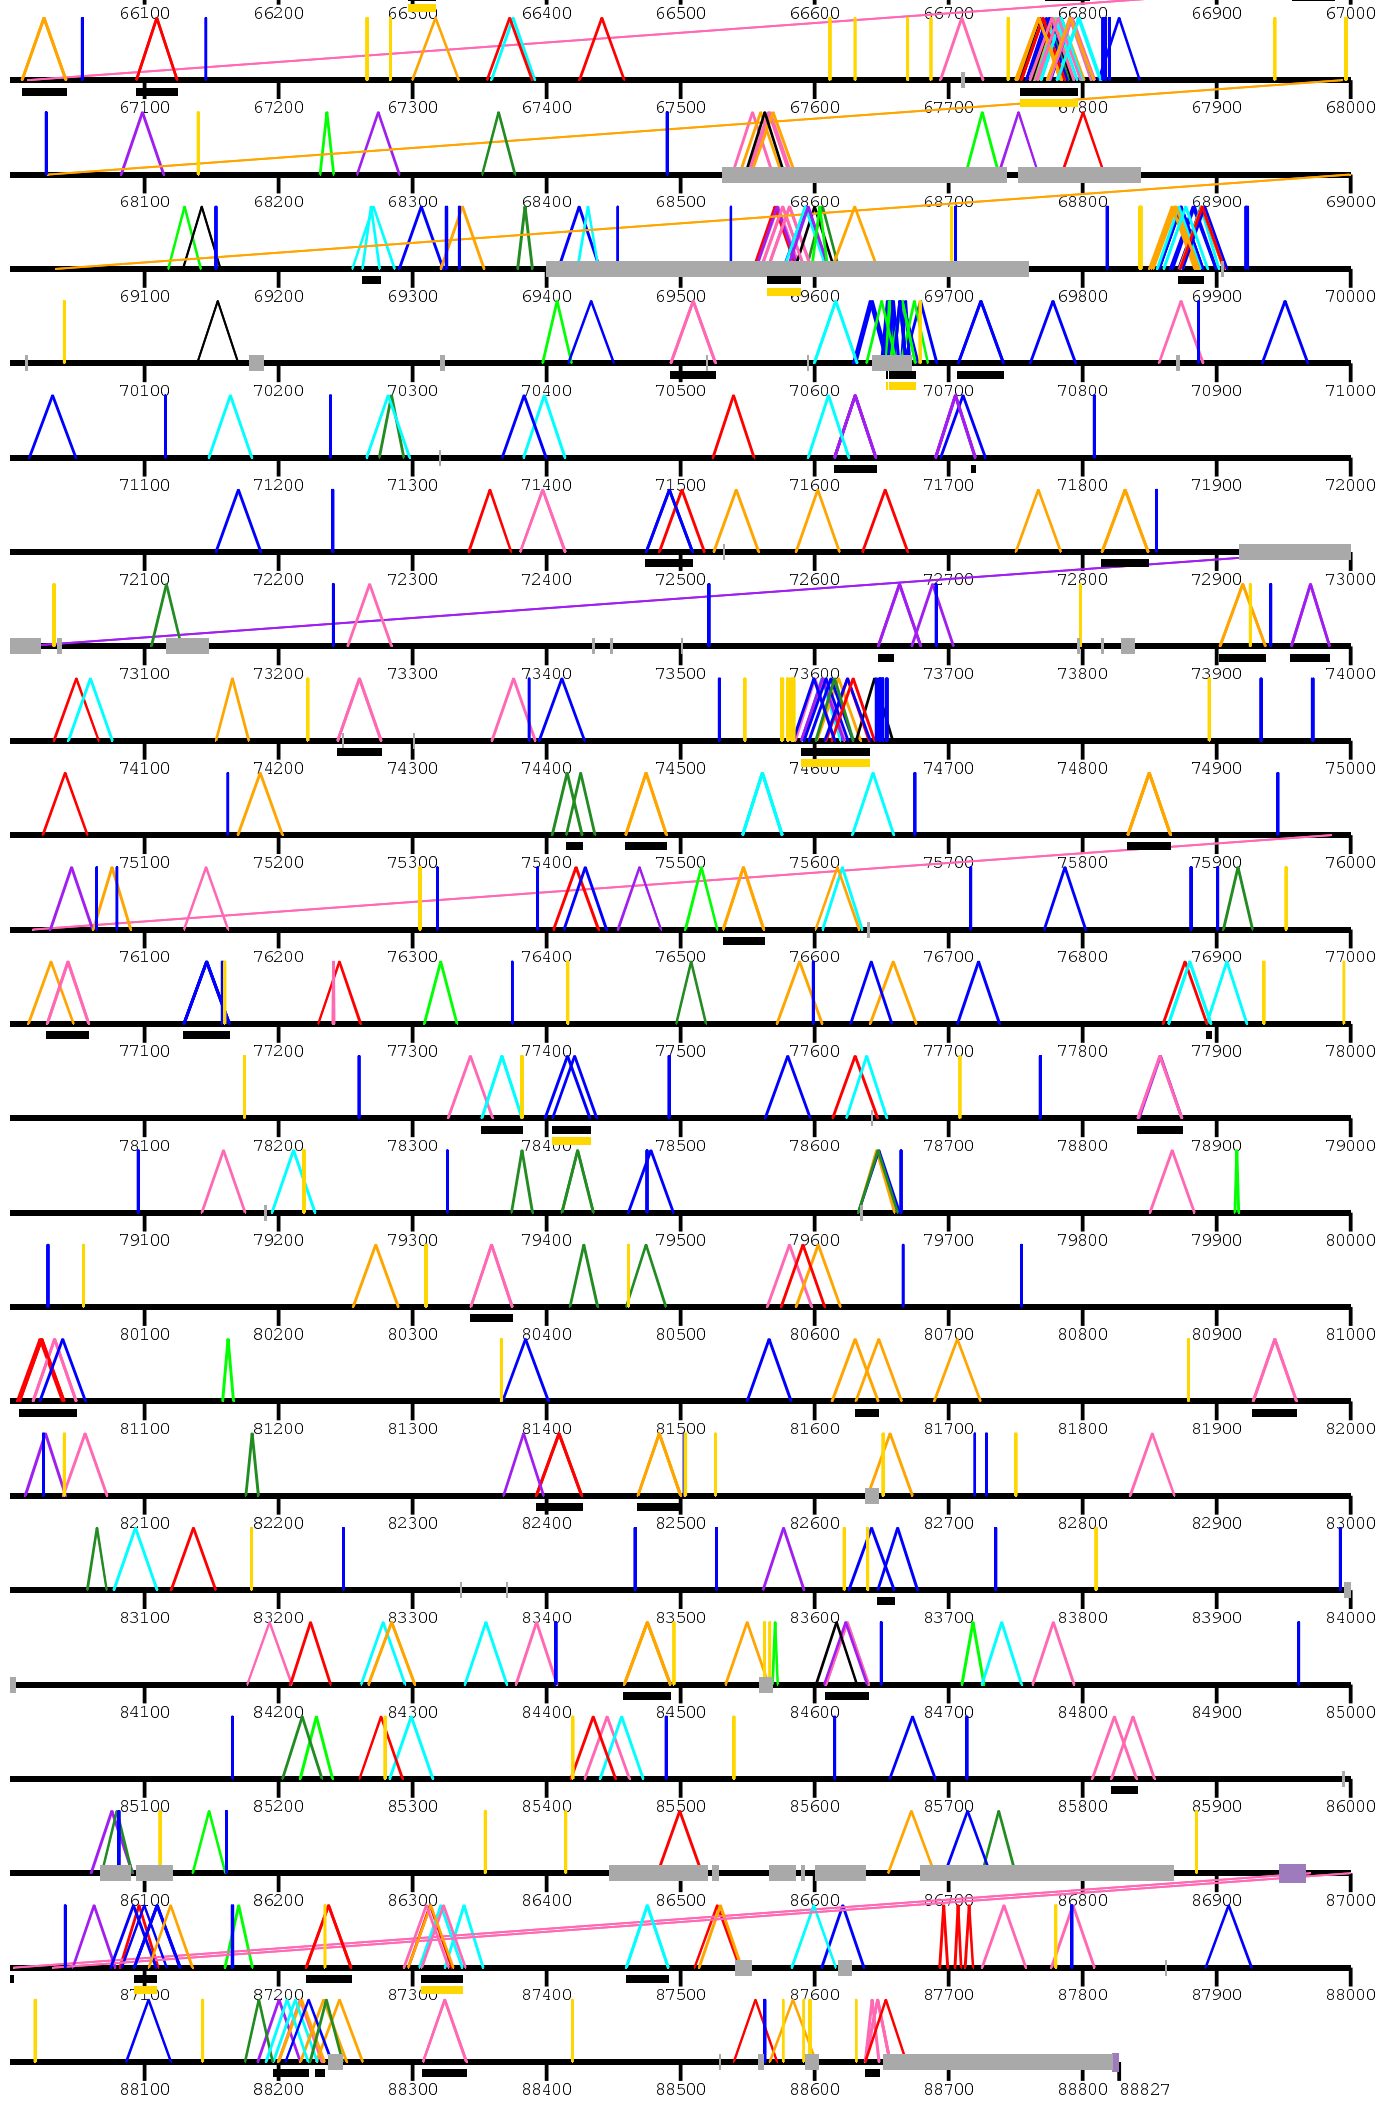

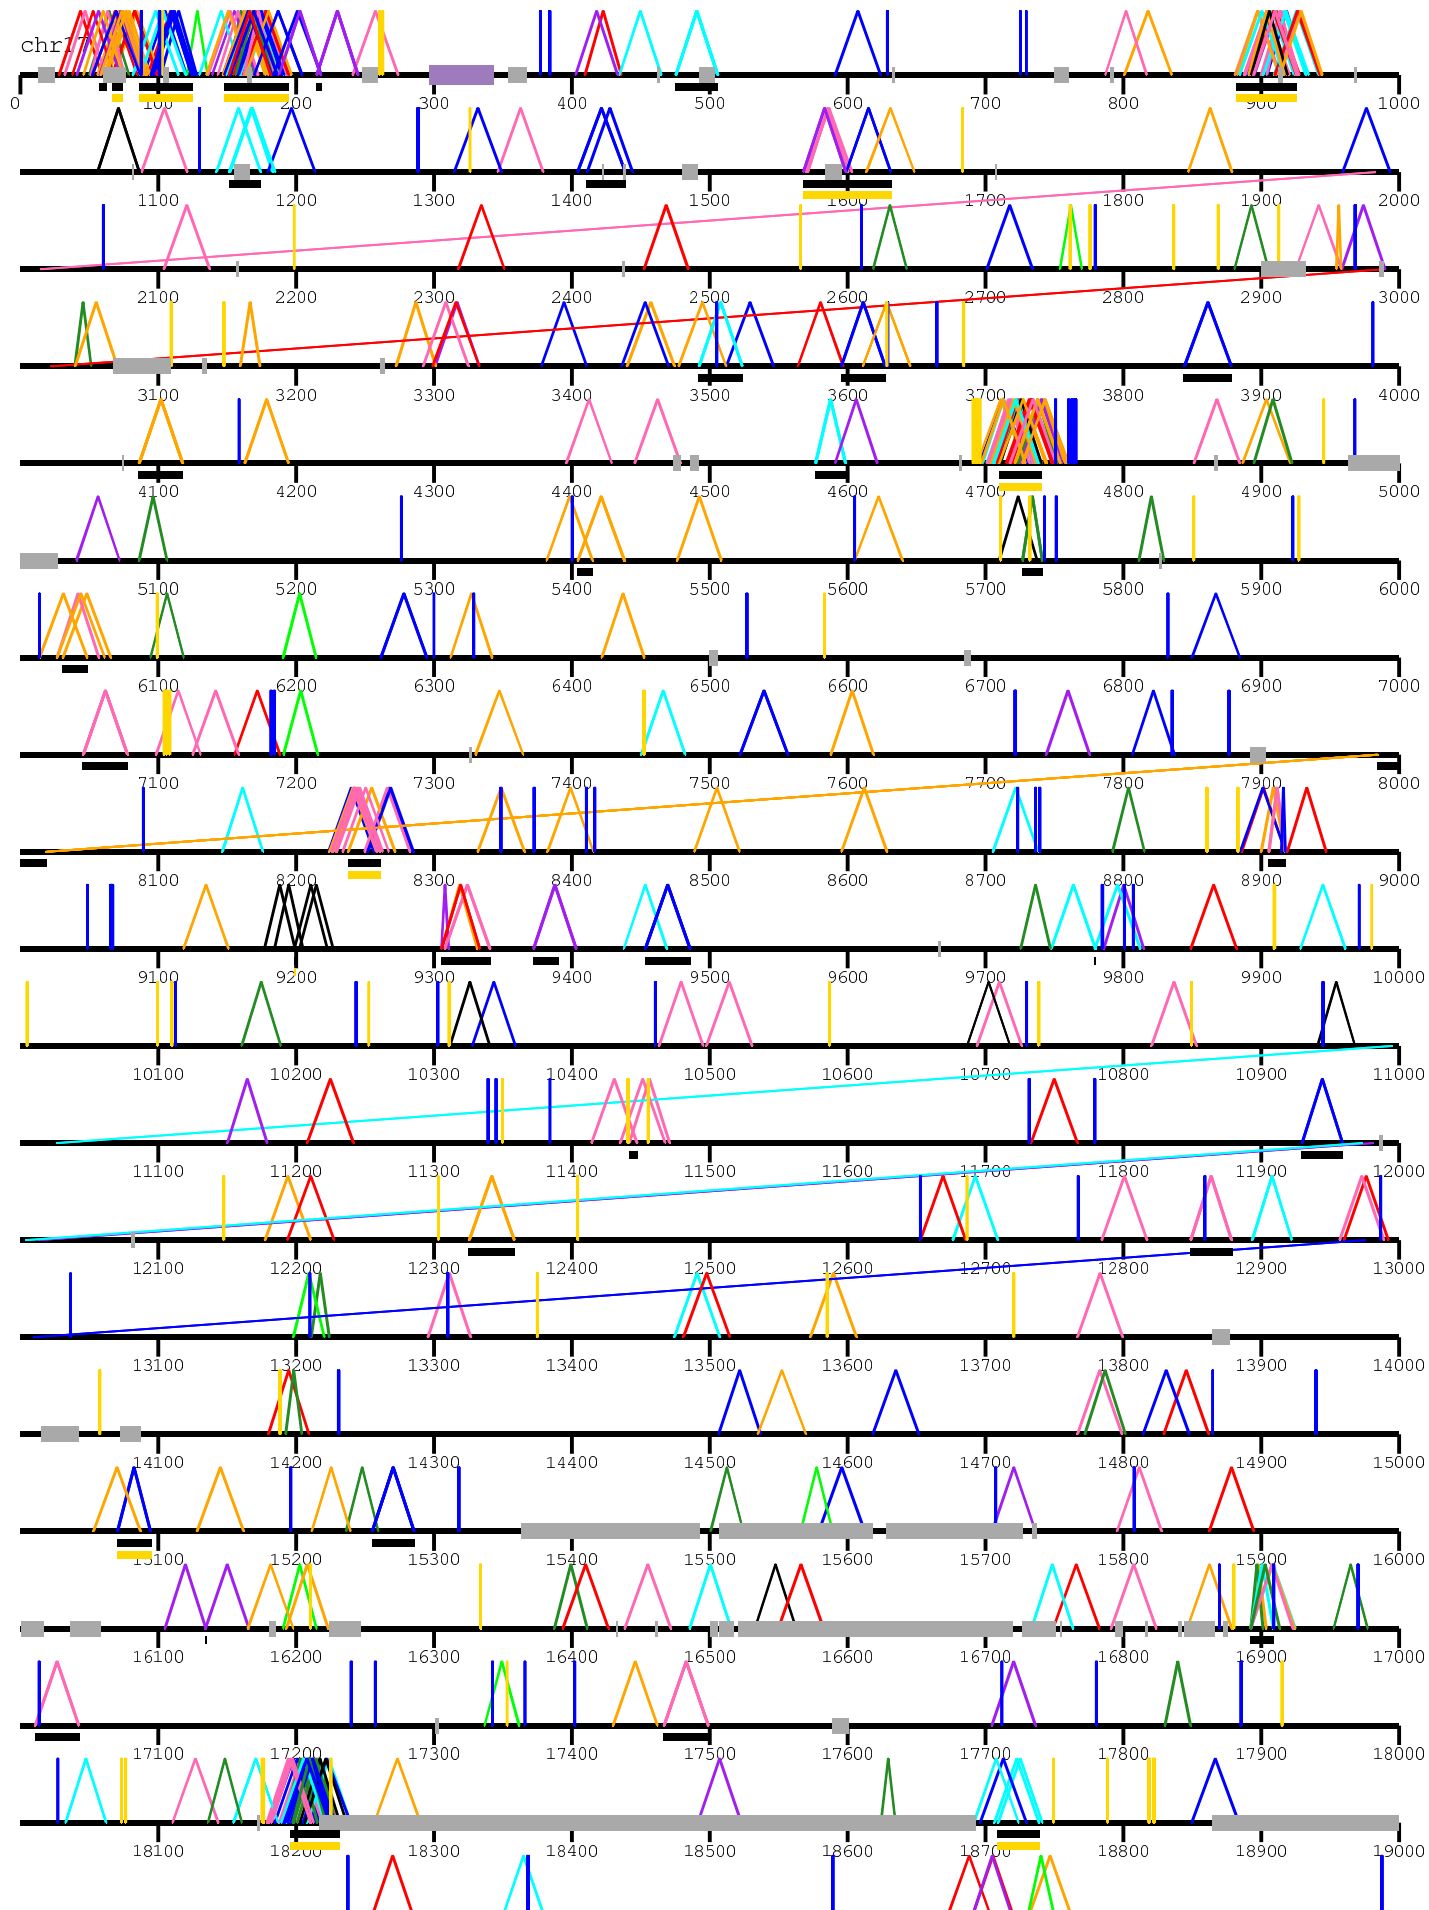

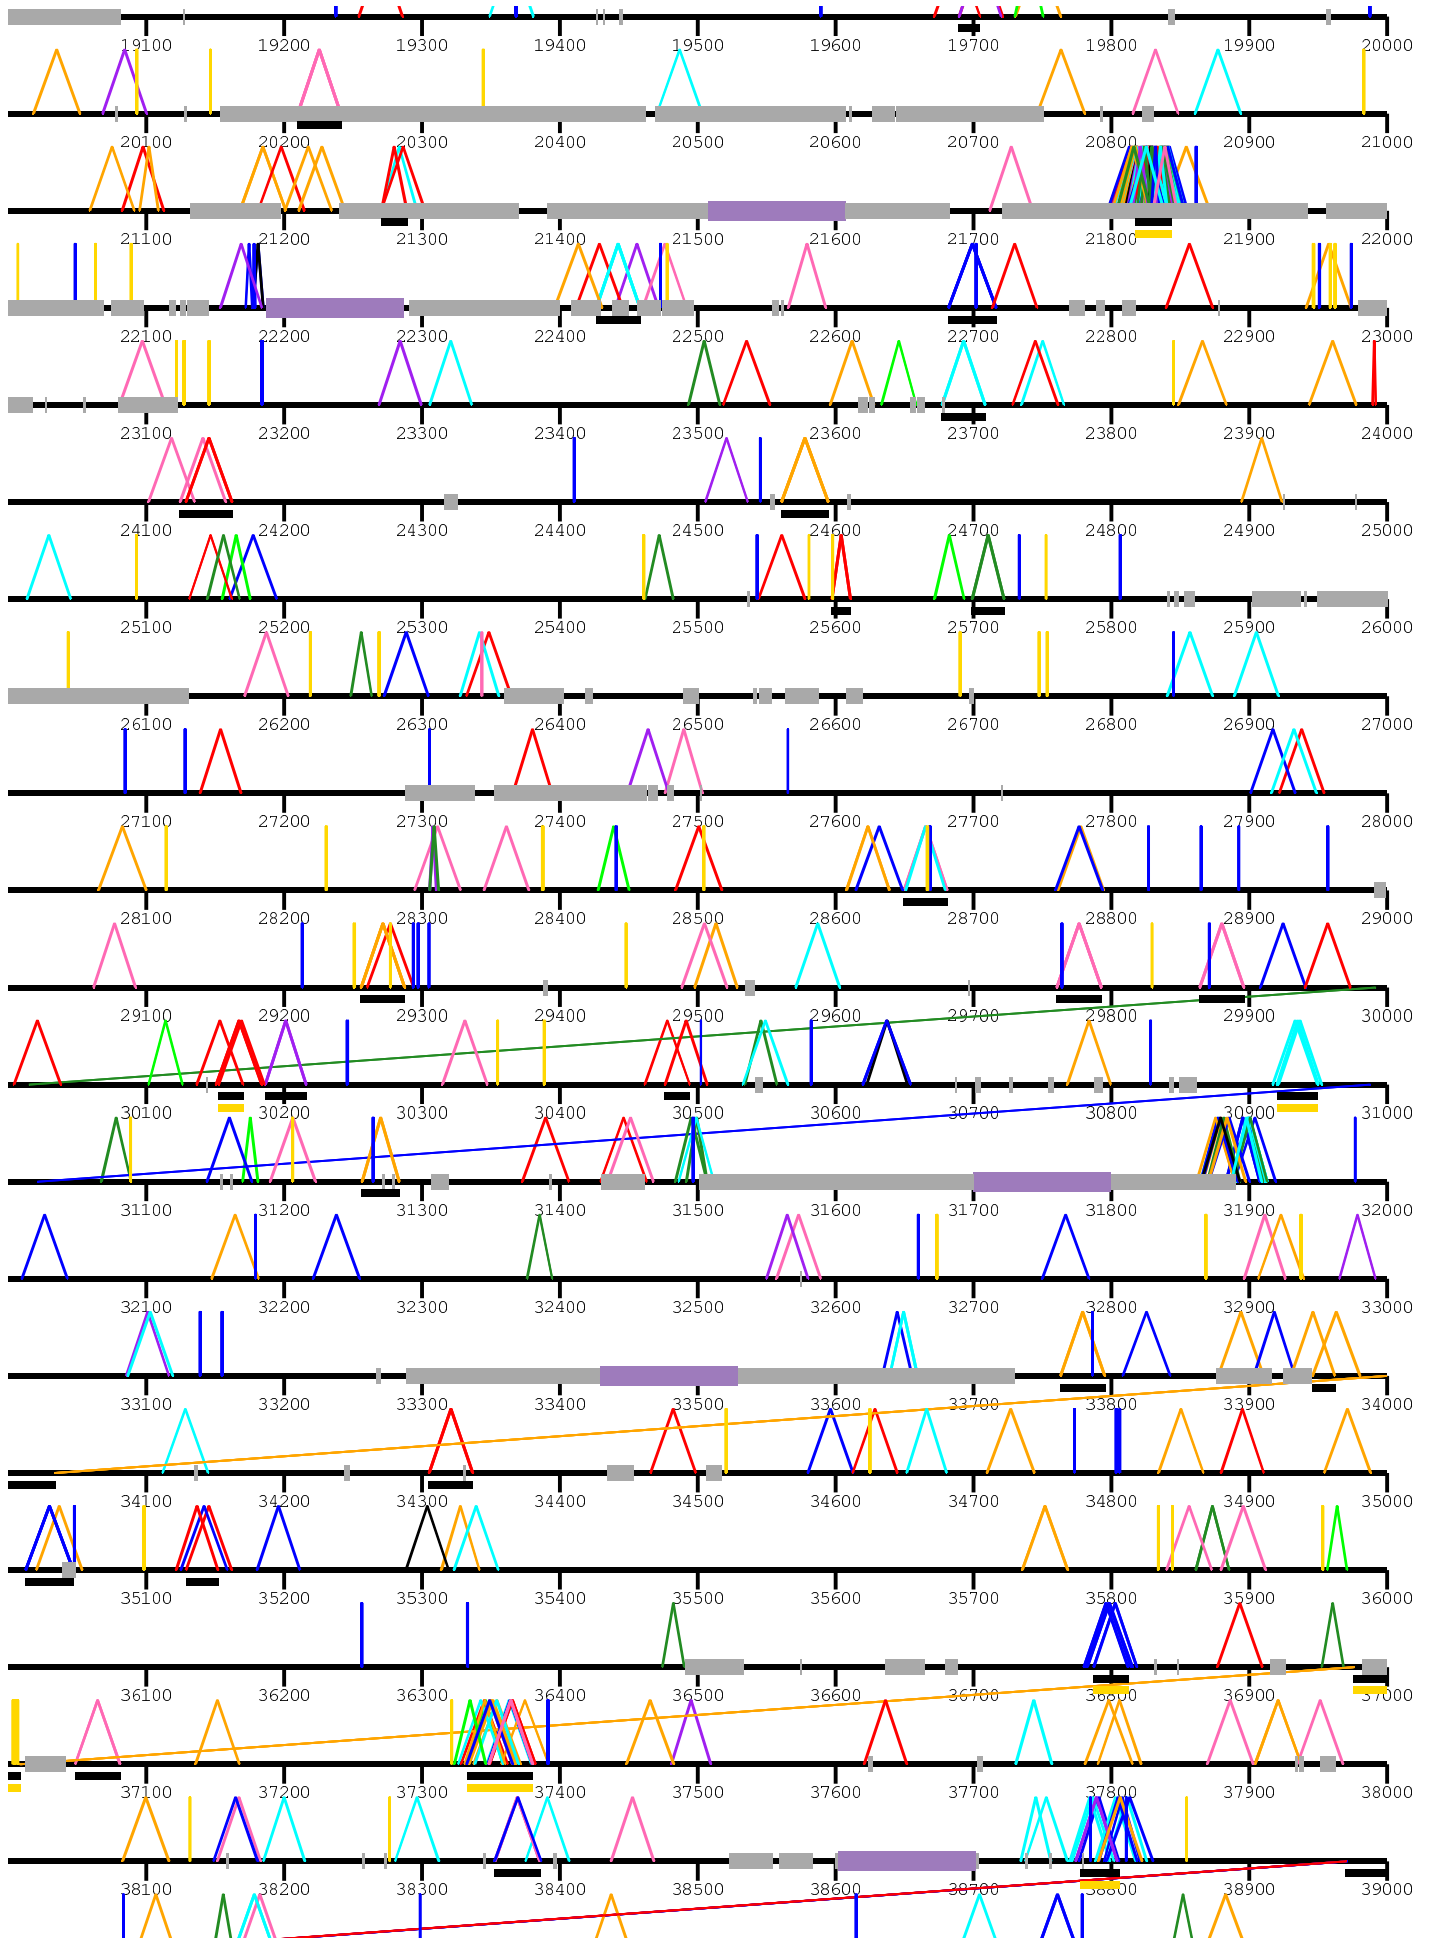

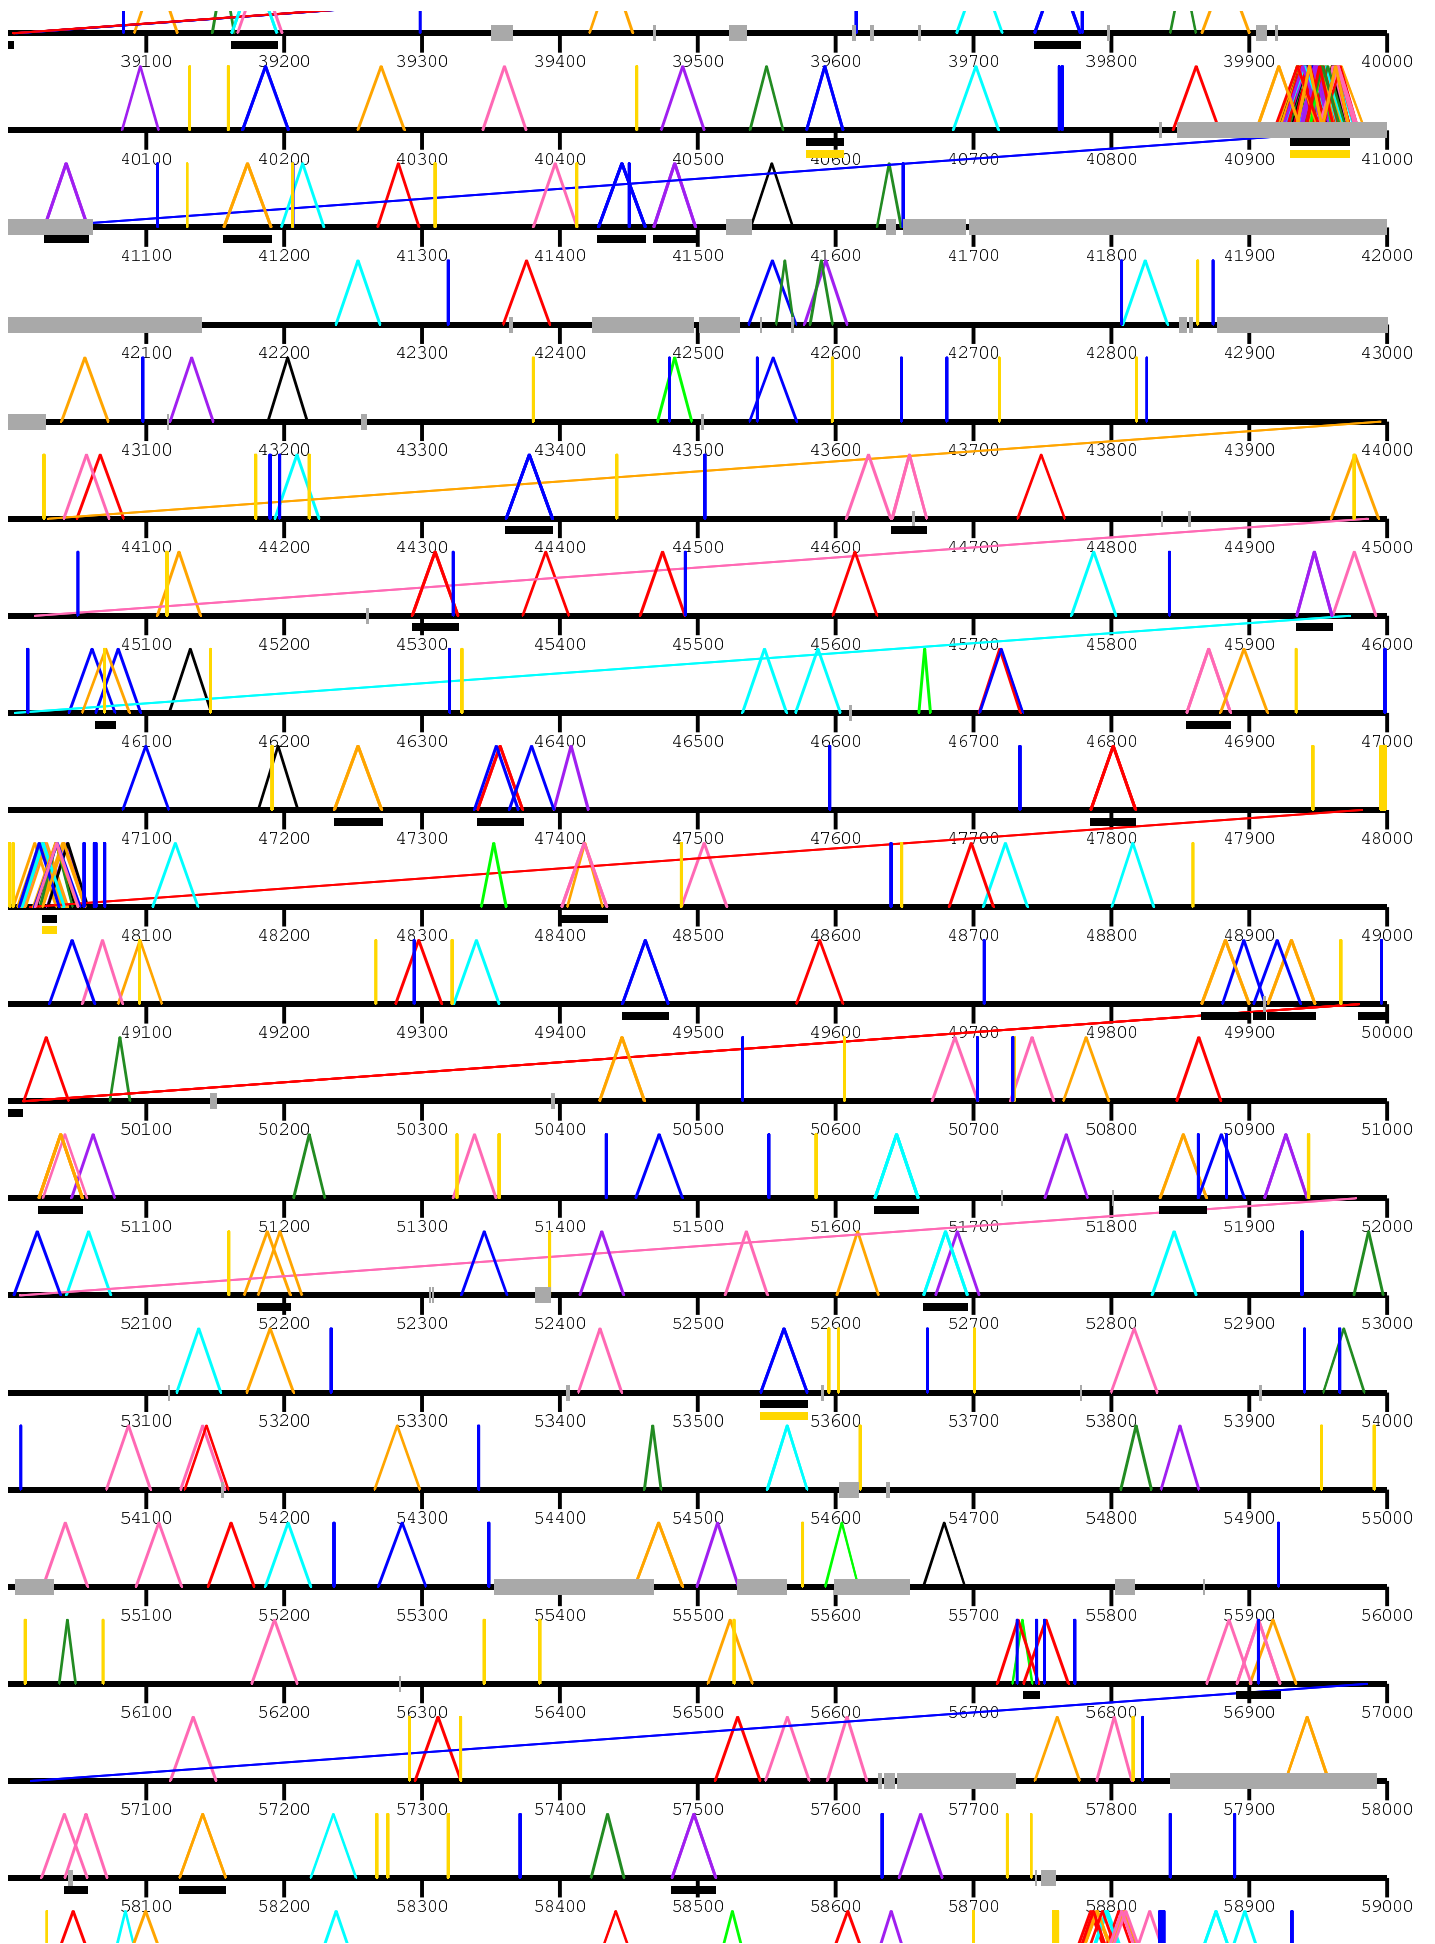

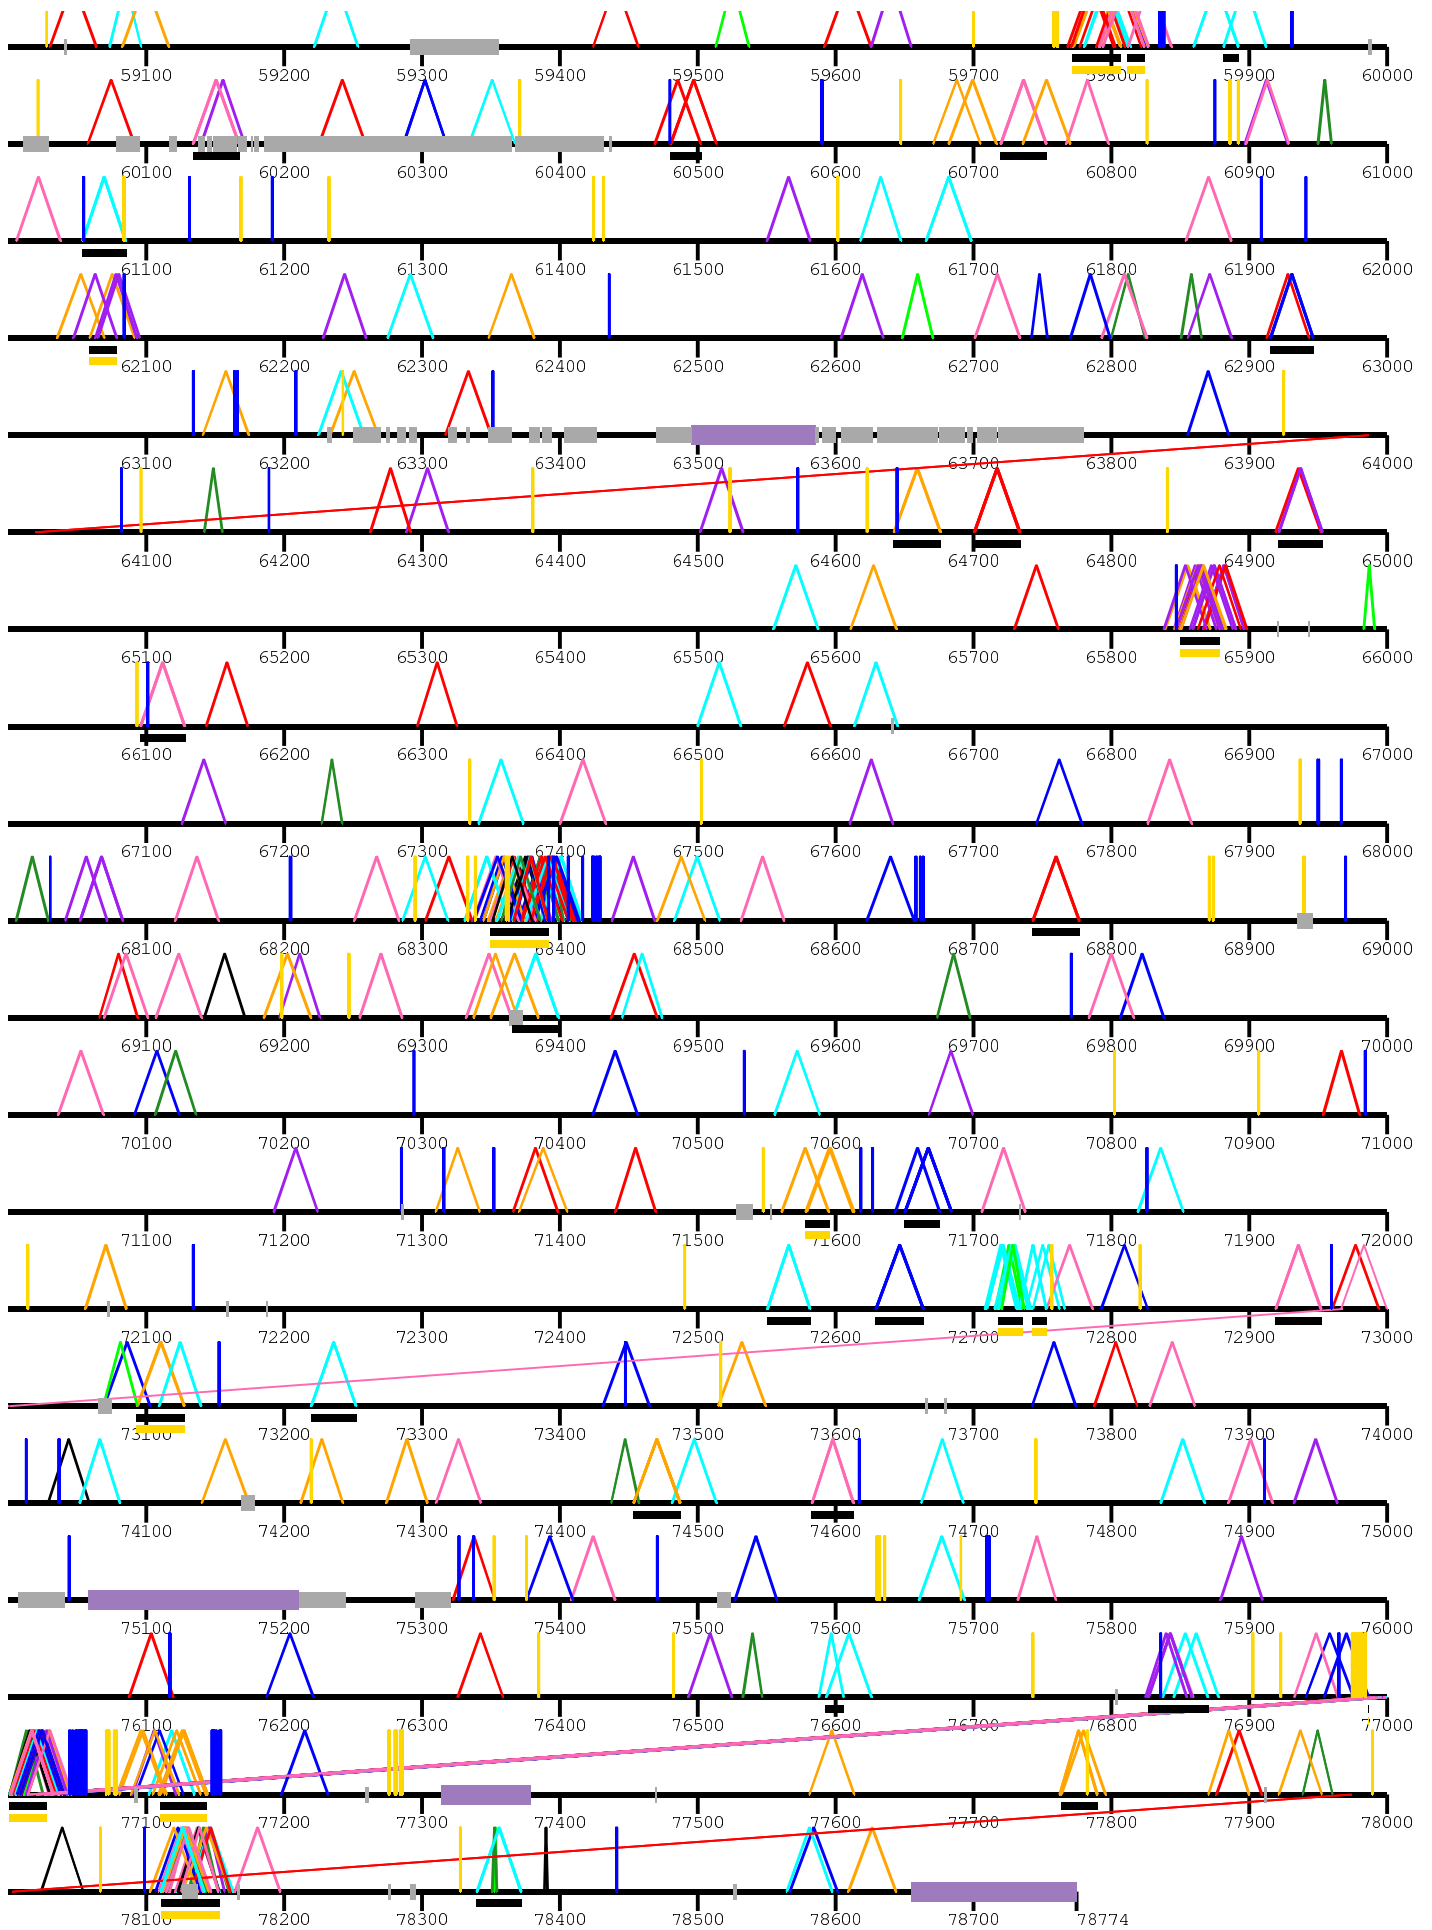

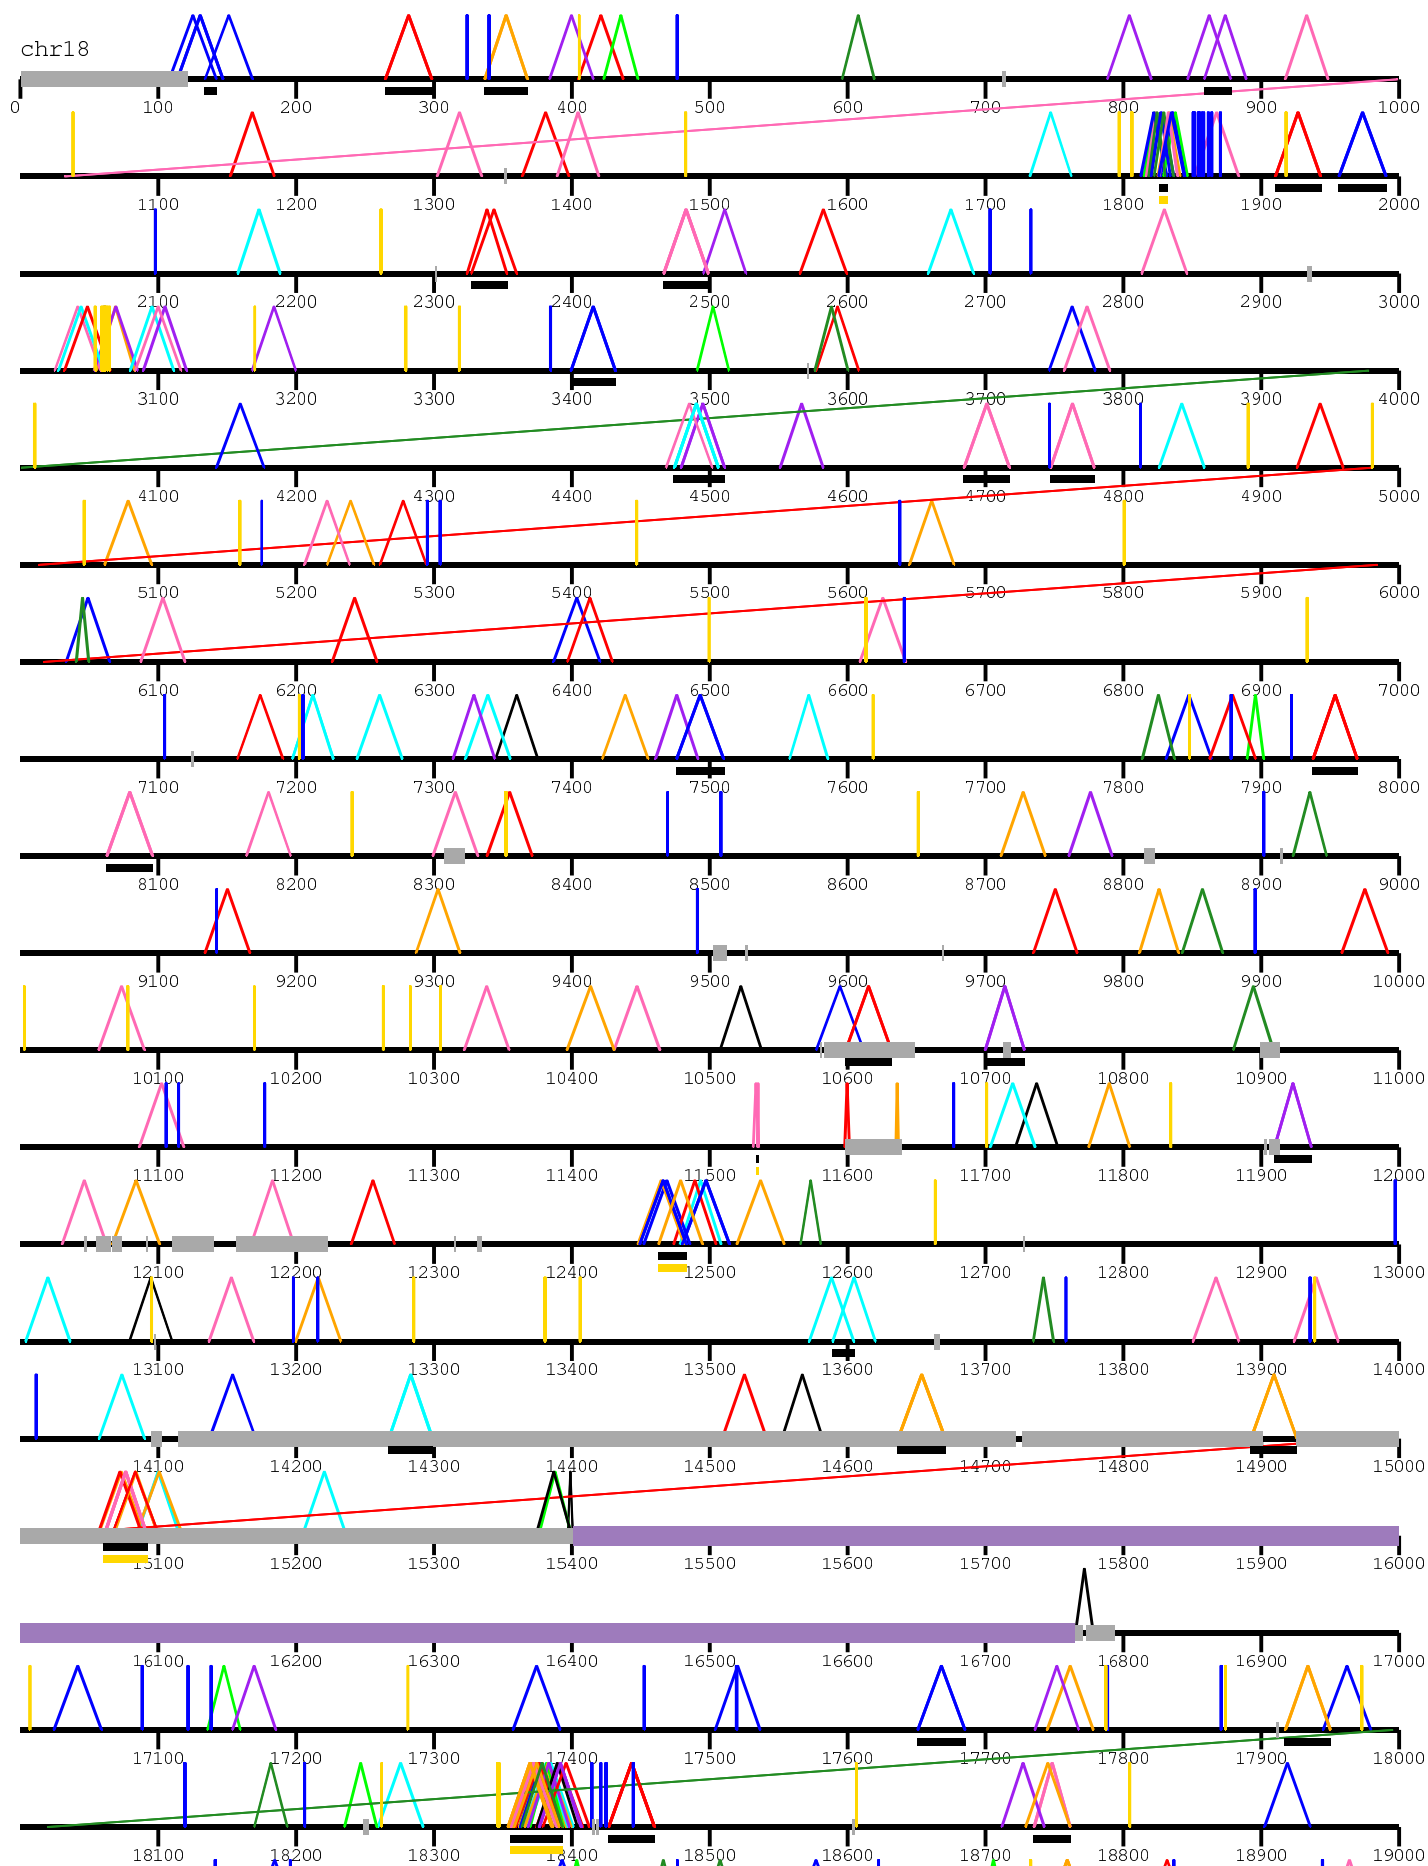



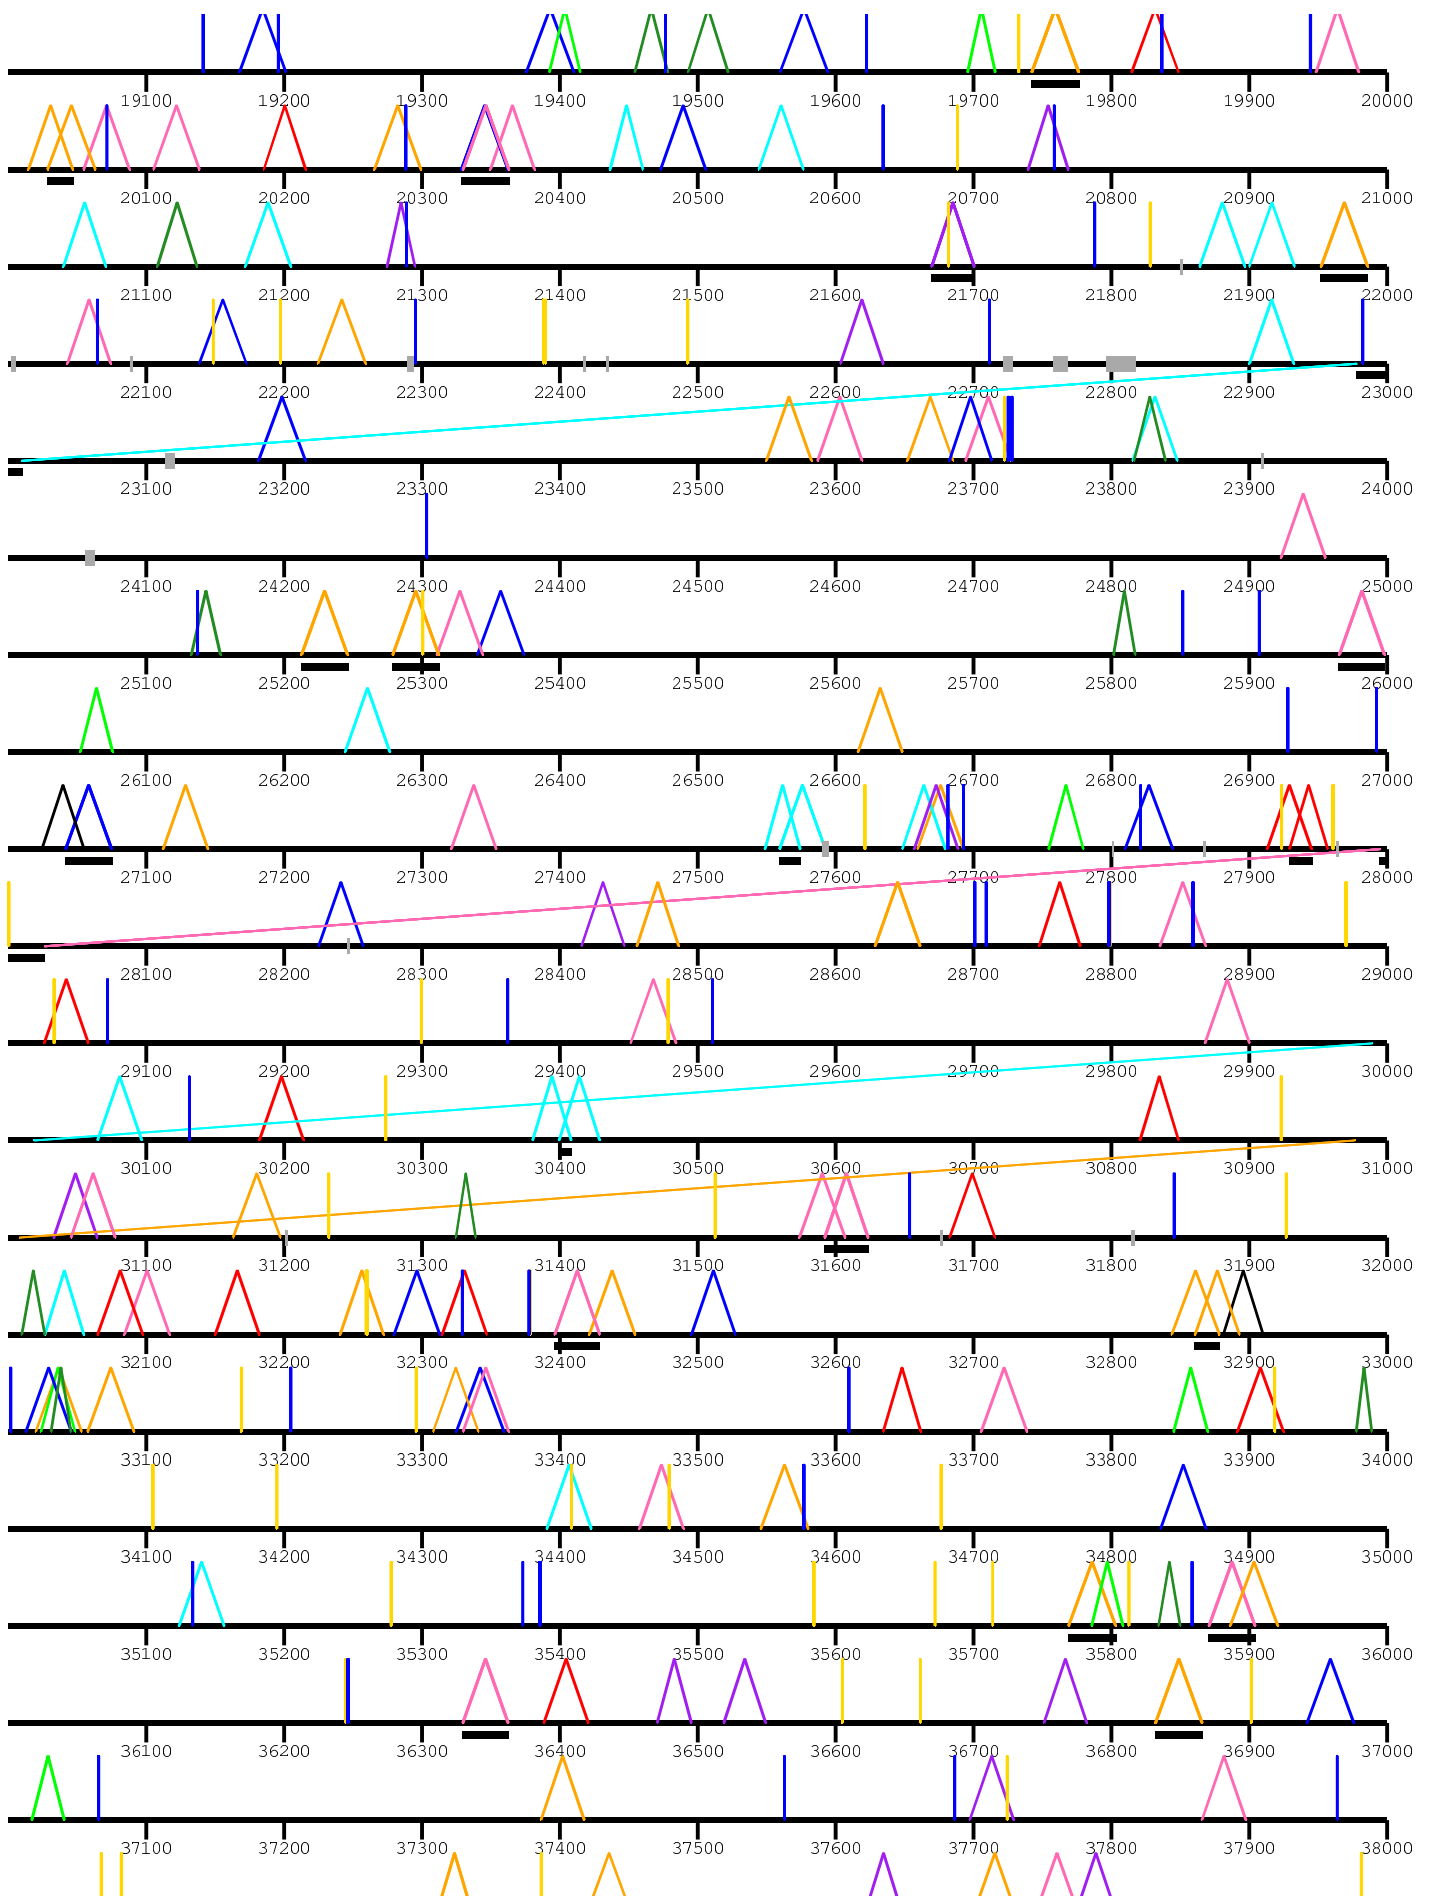

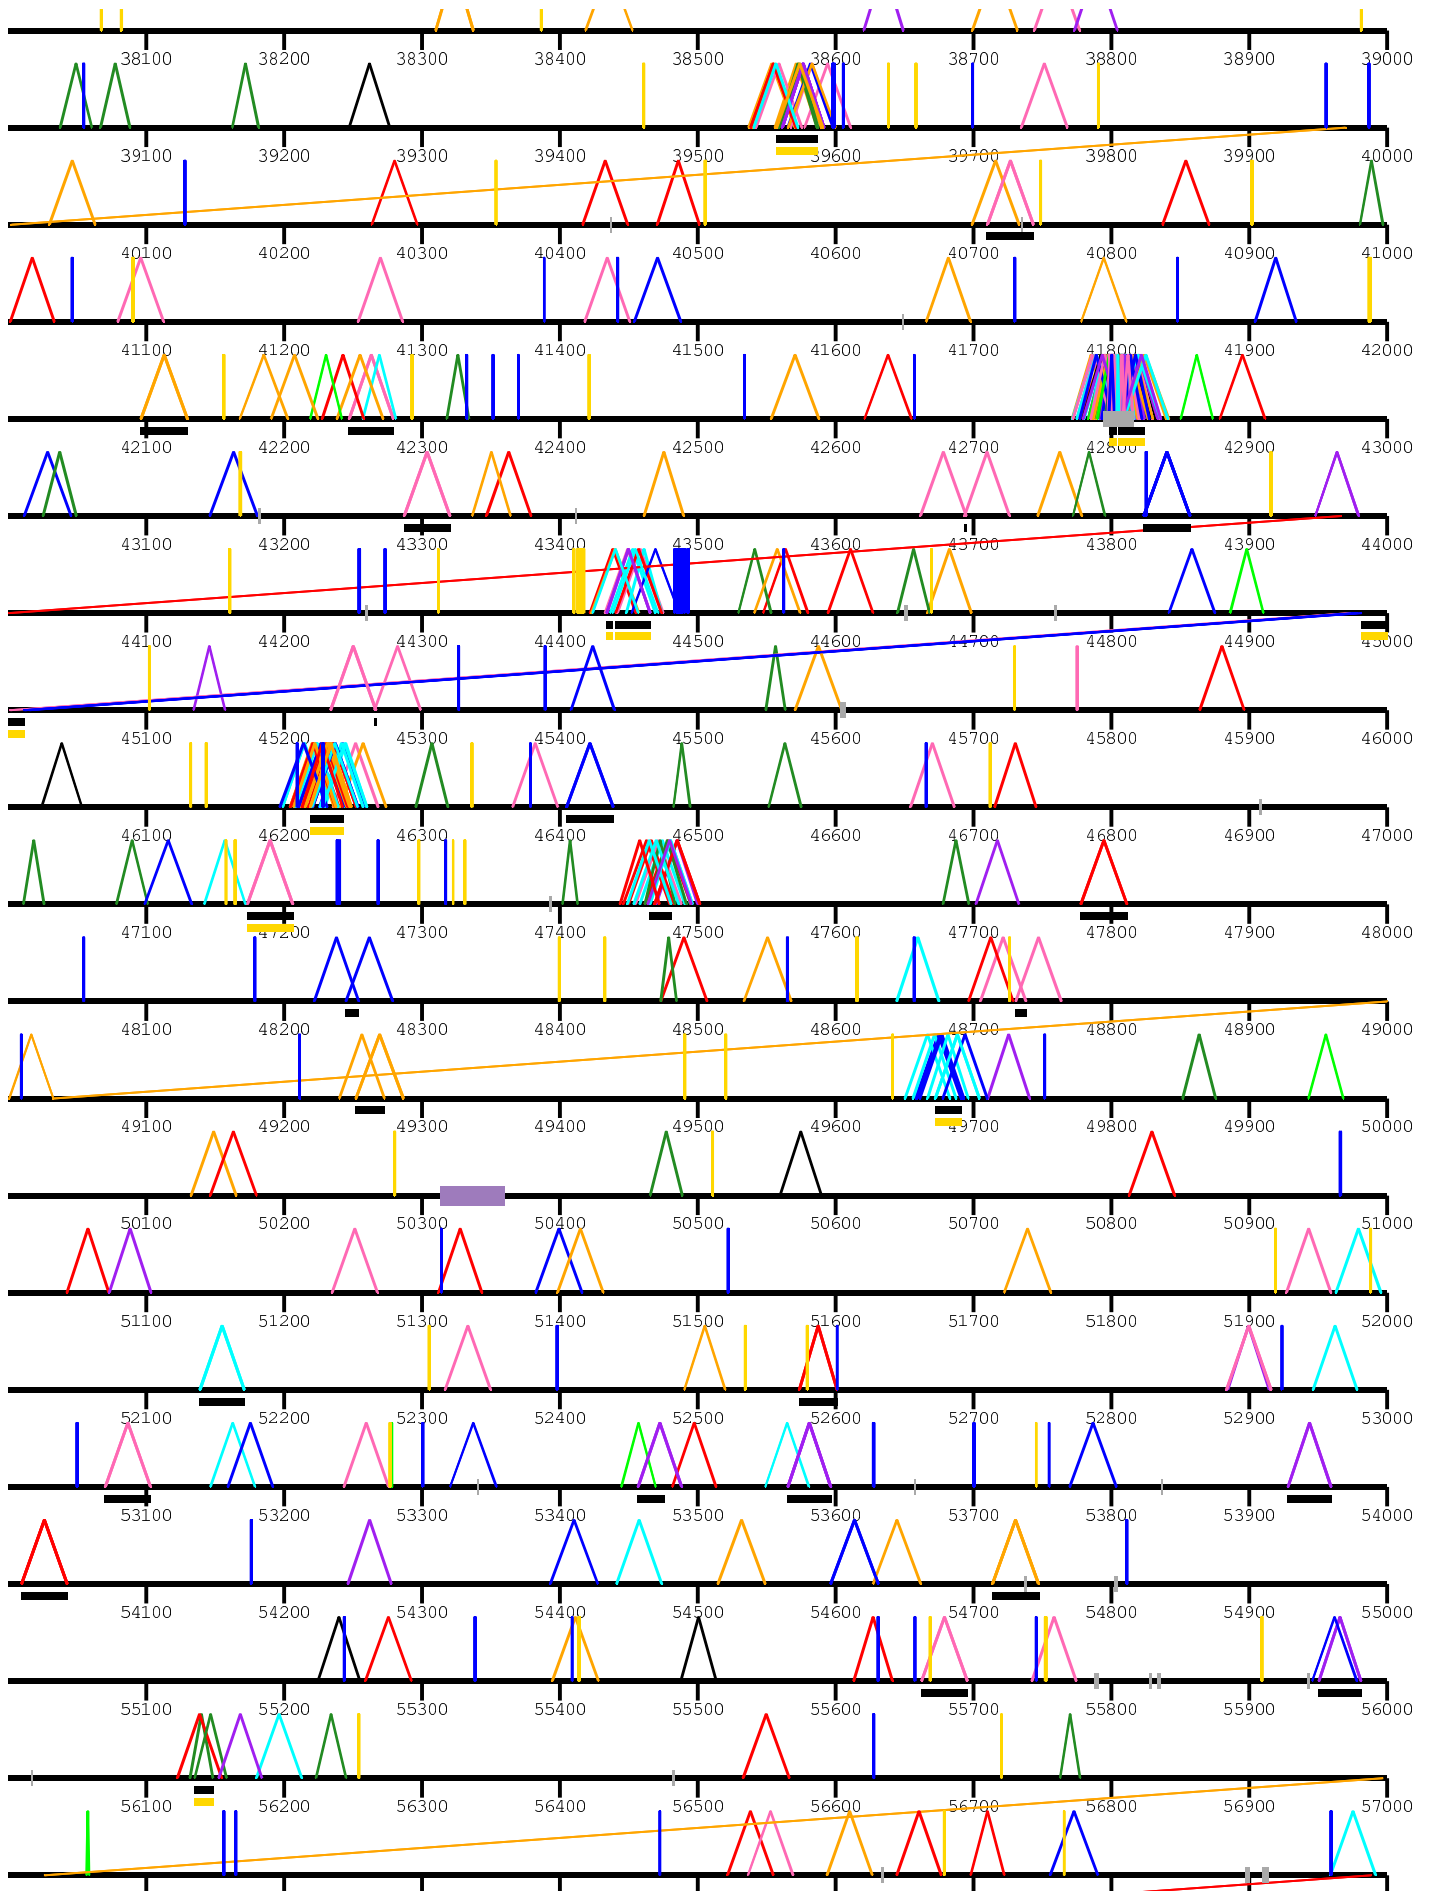

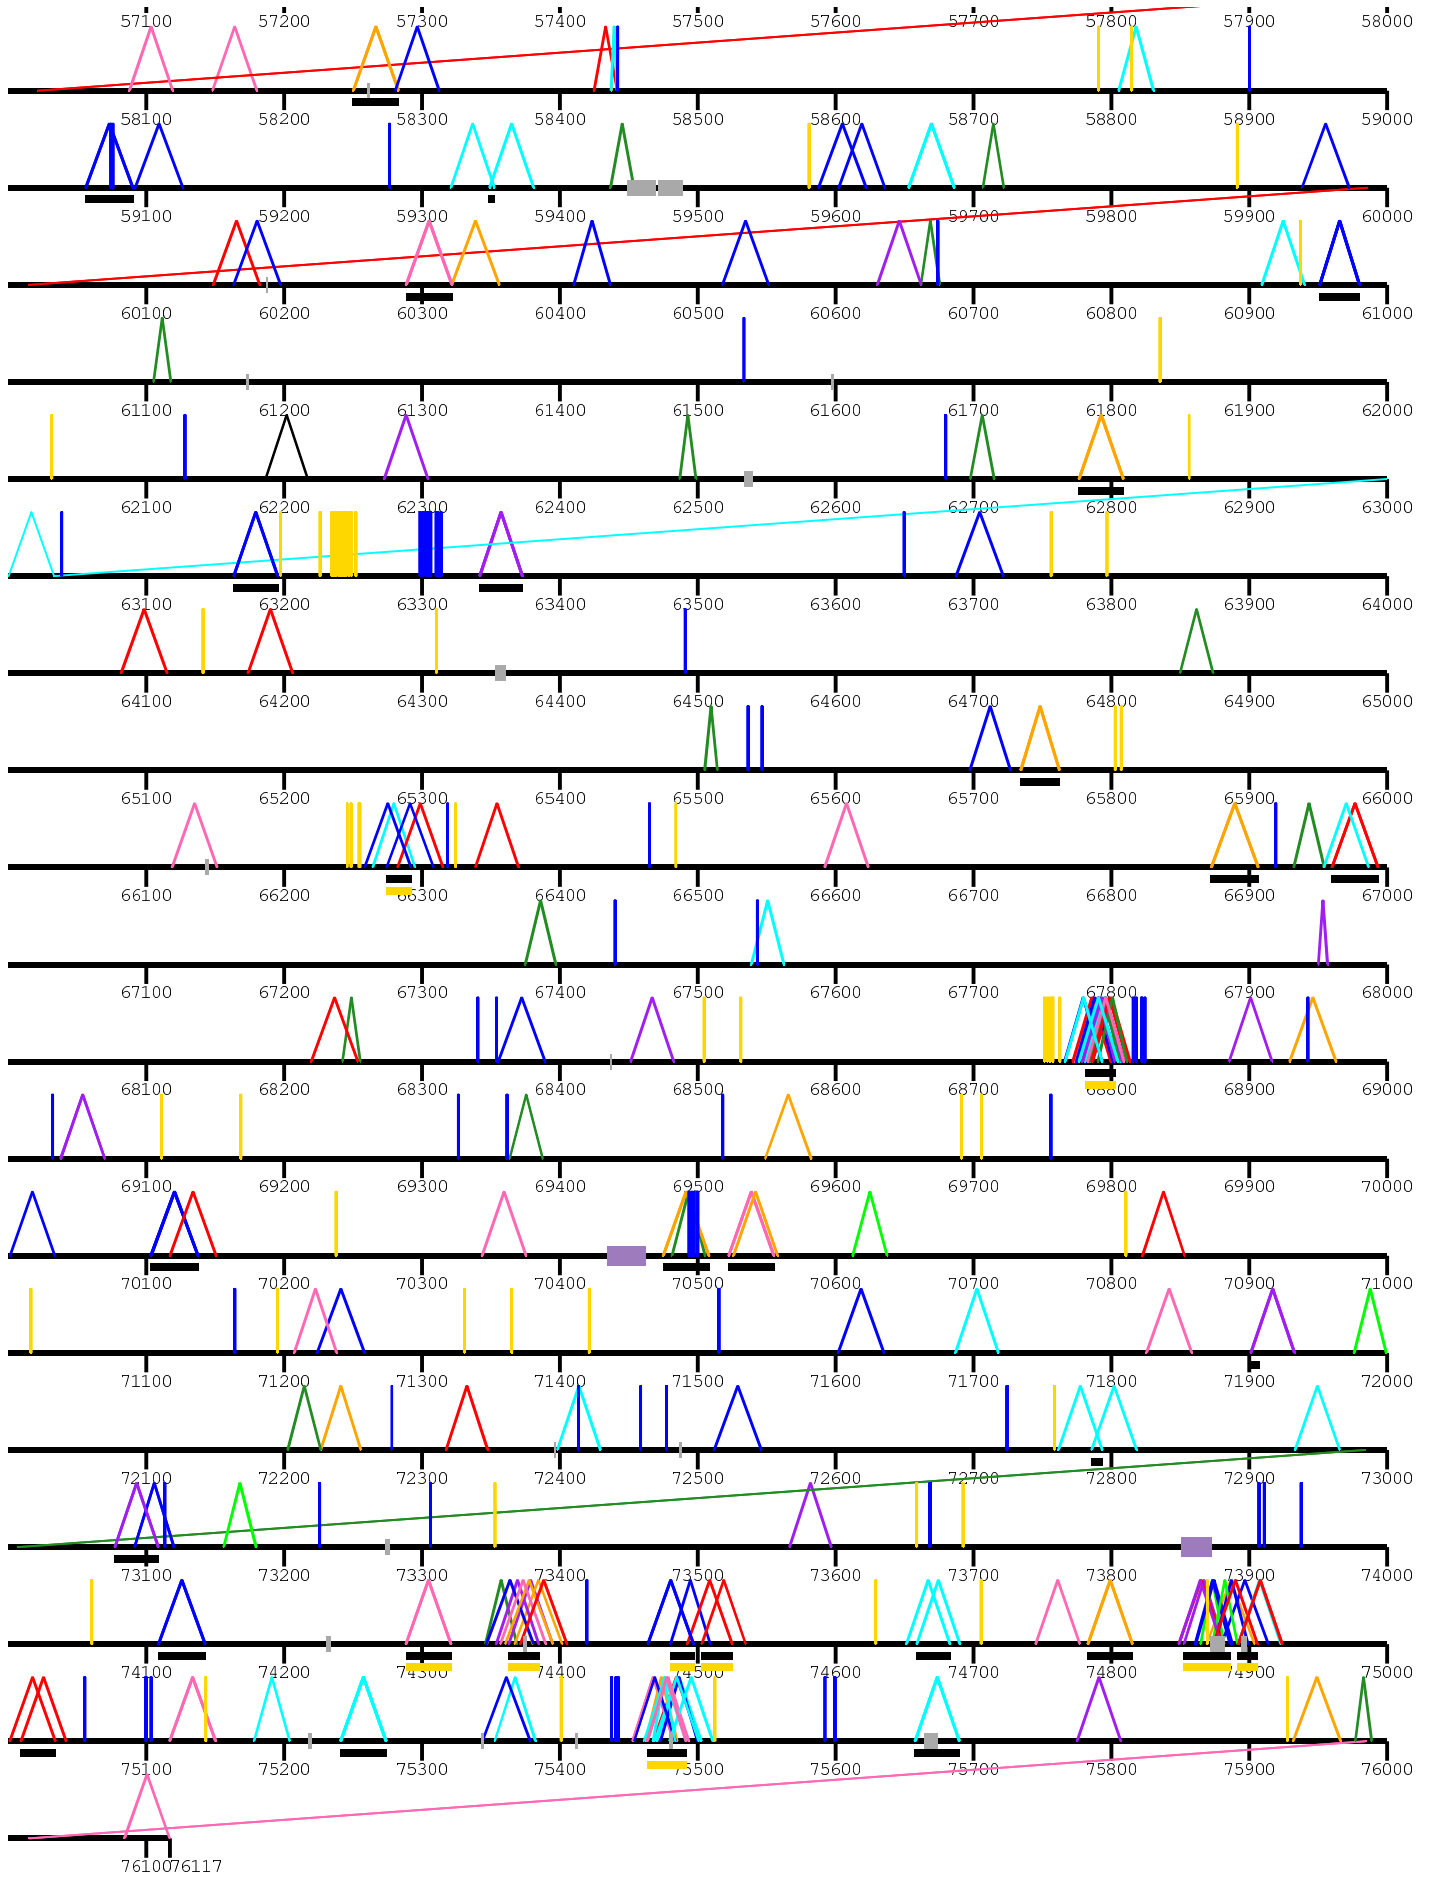

7610076117

chr19

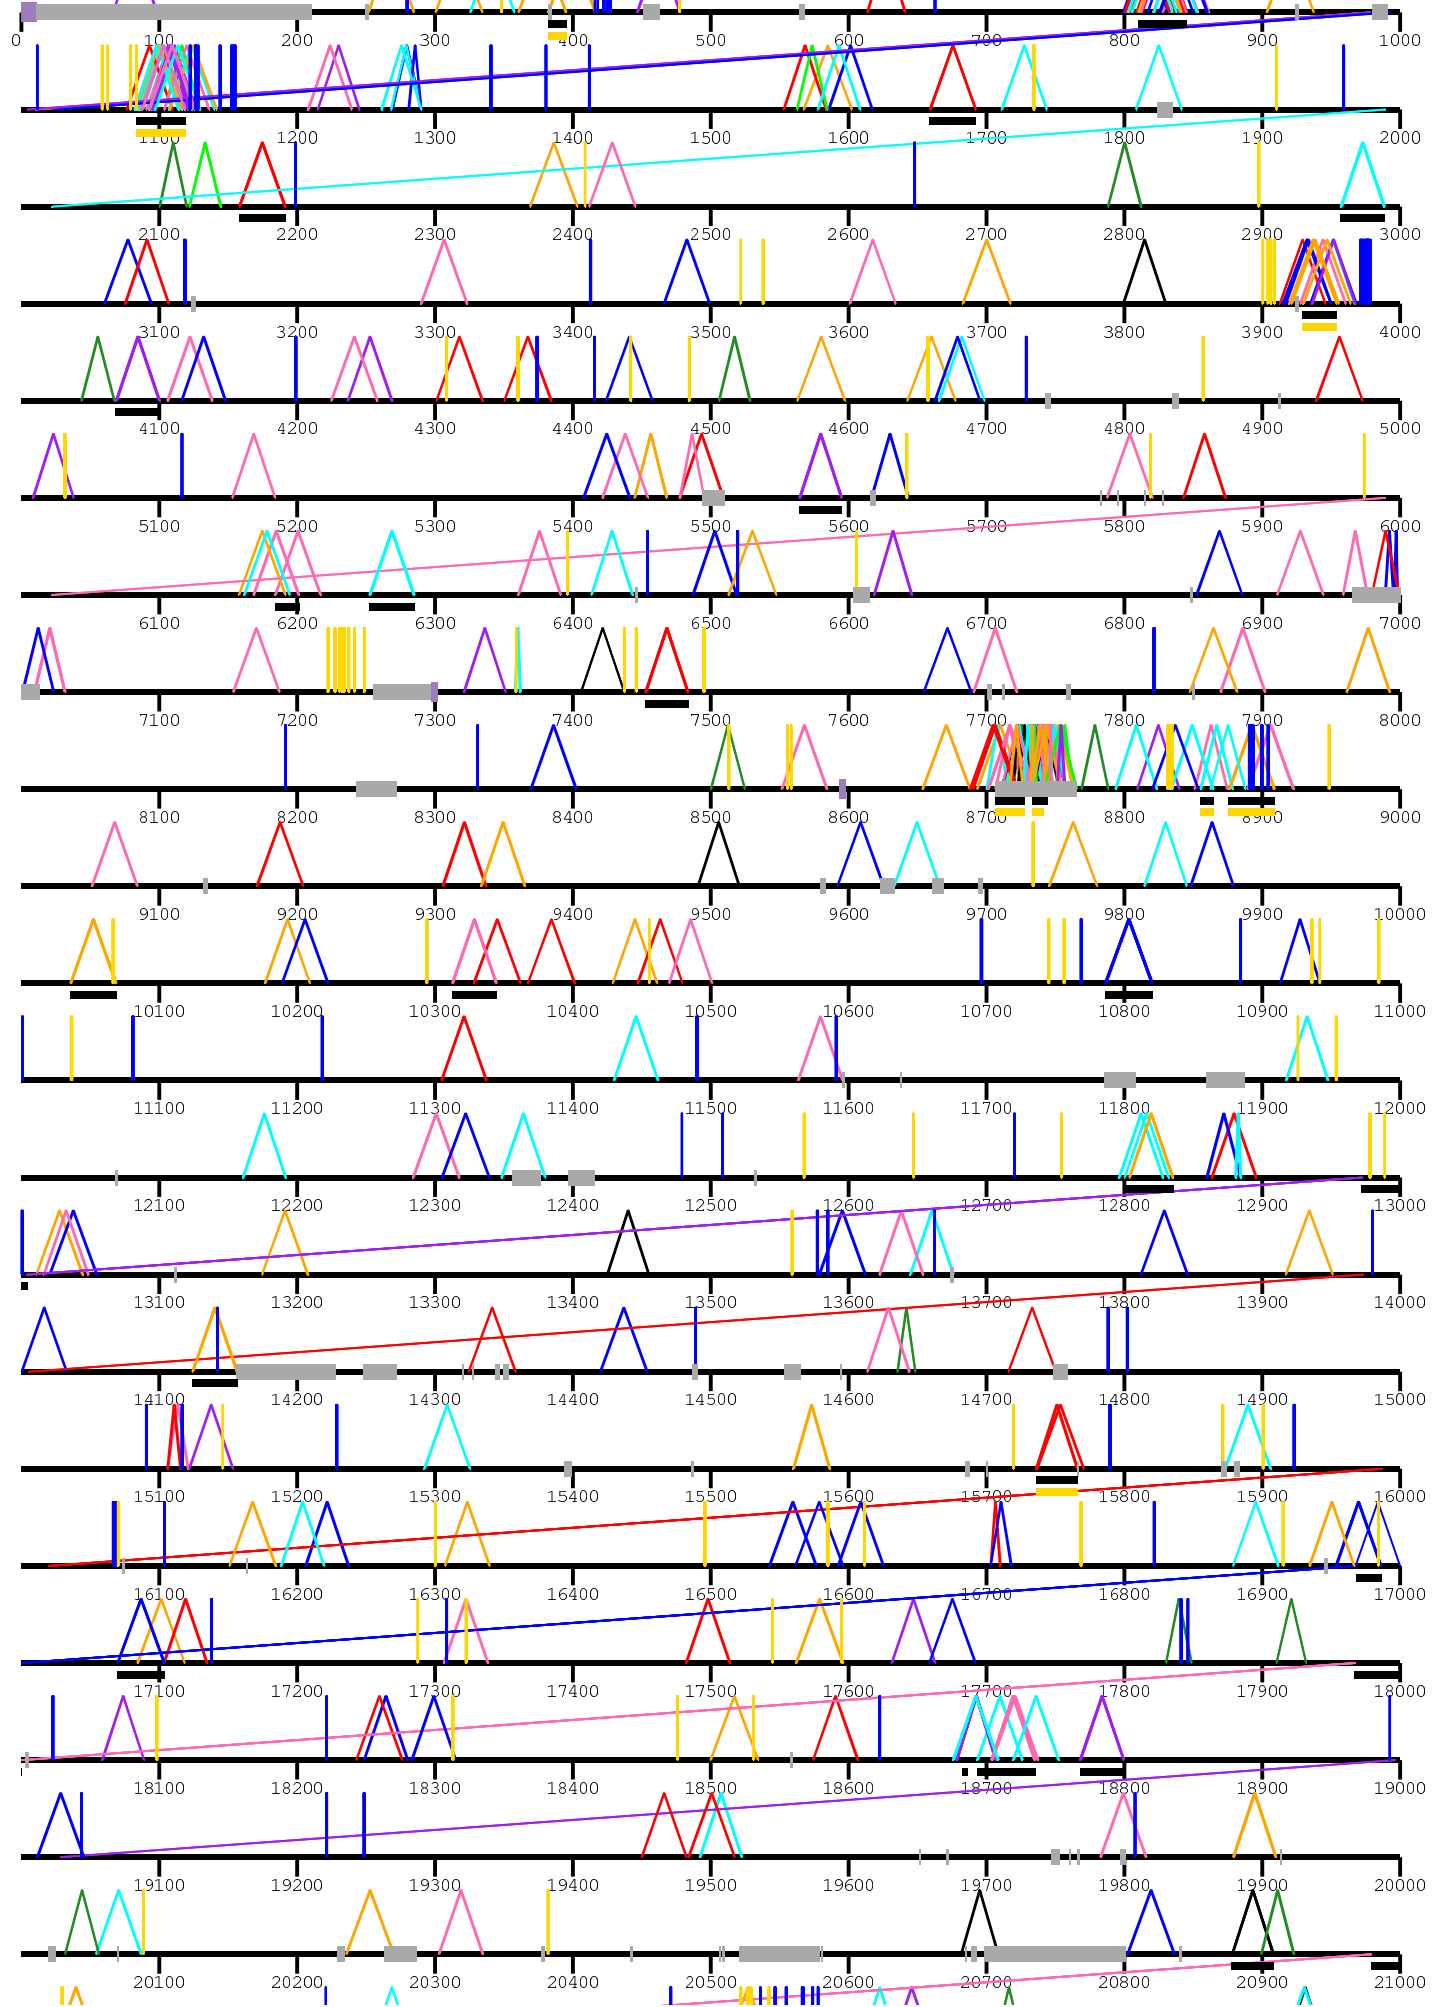

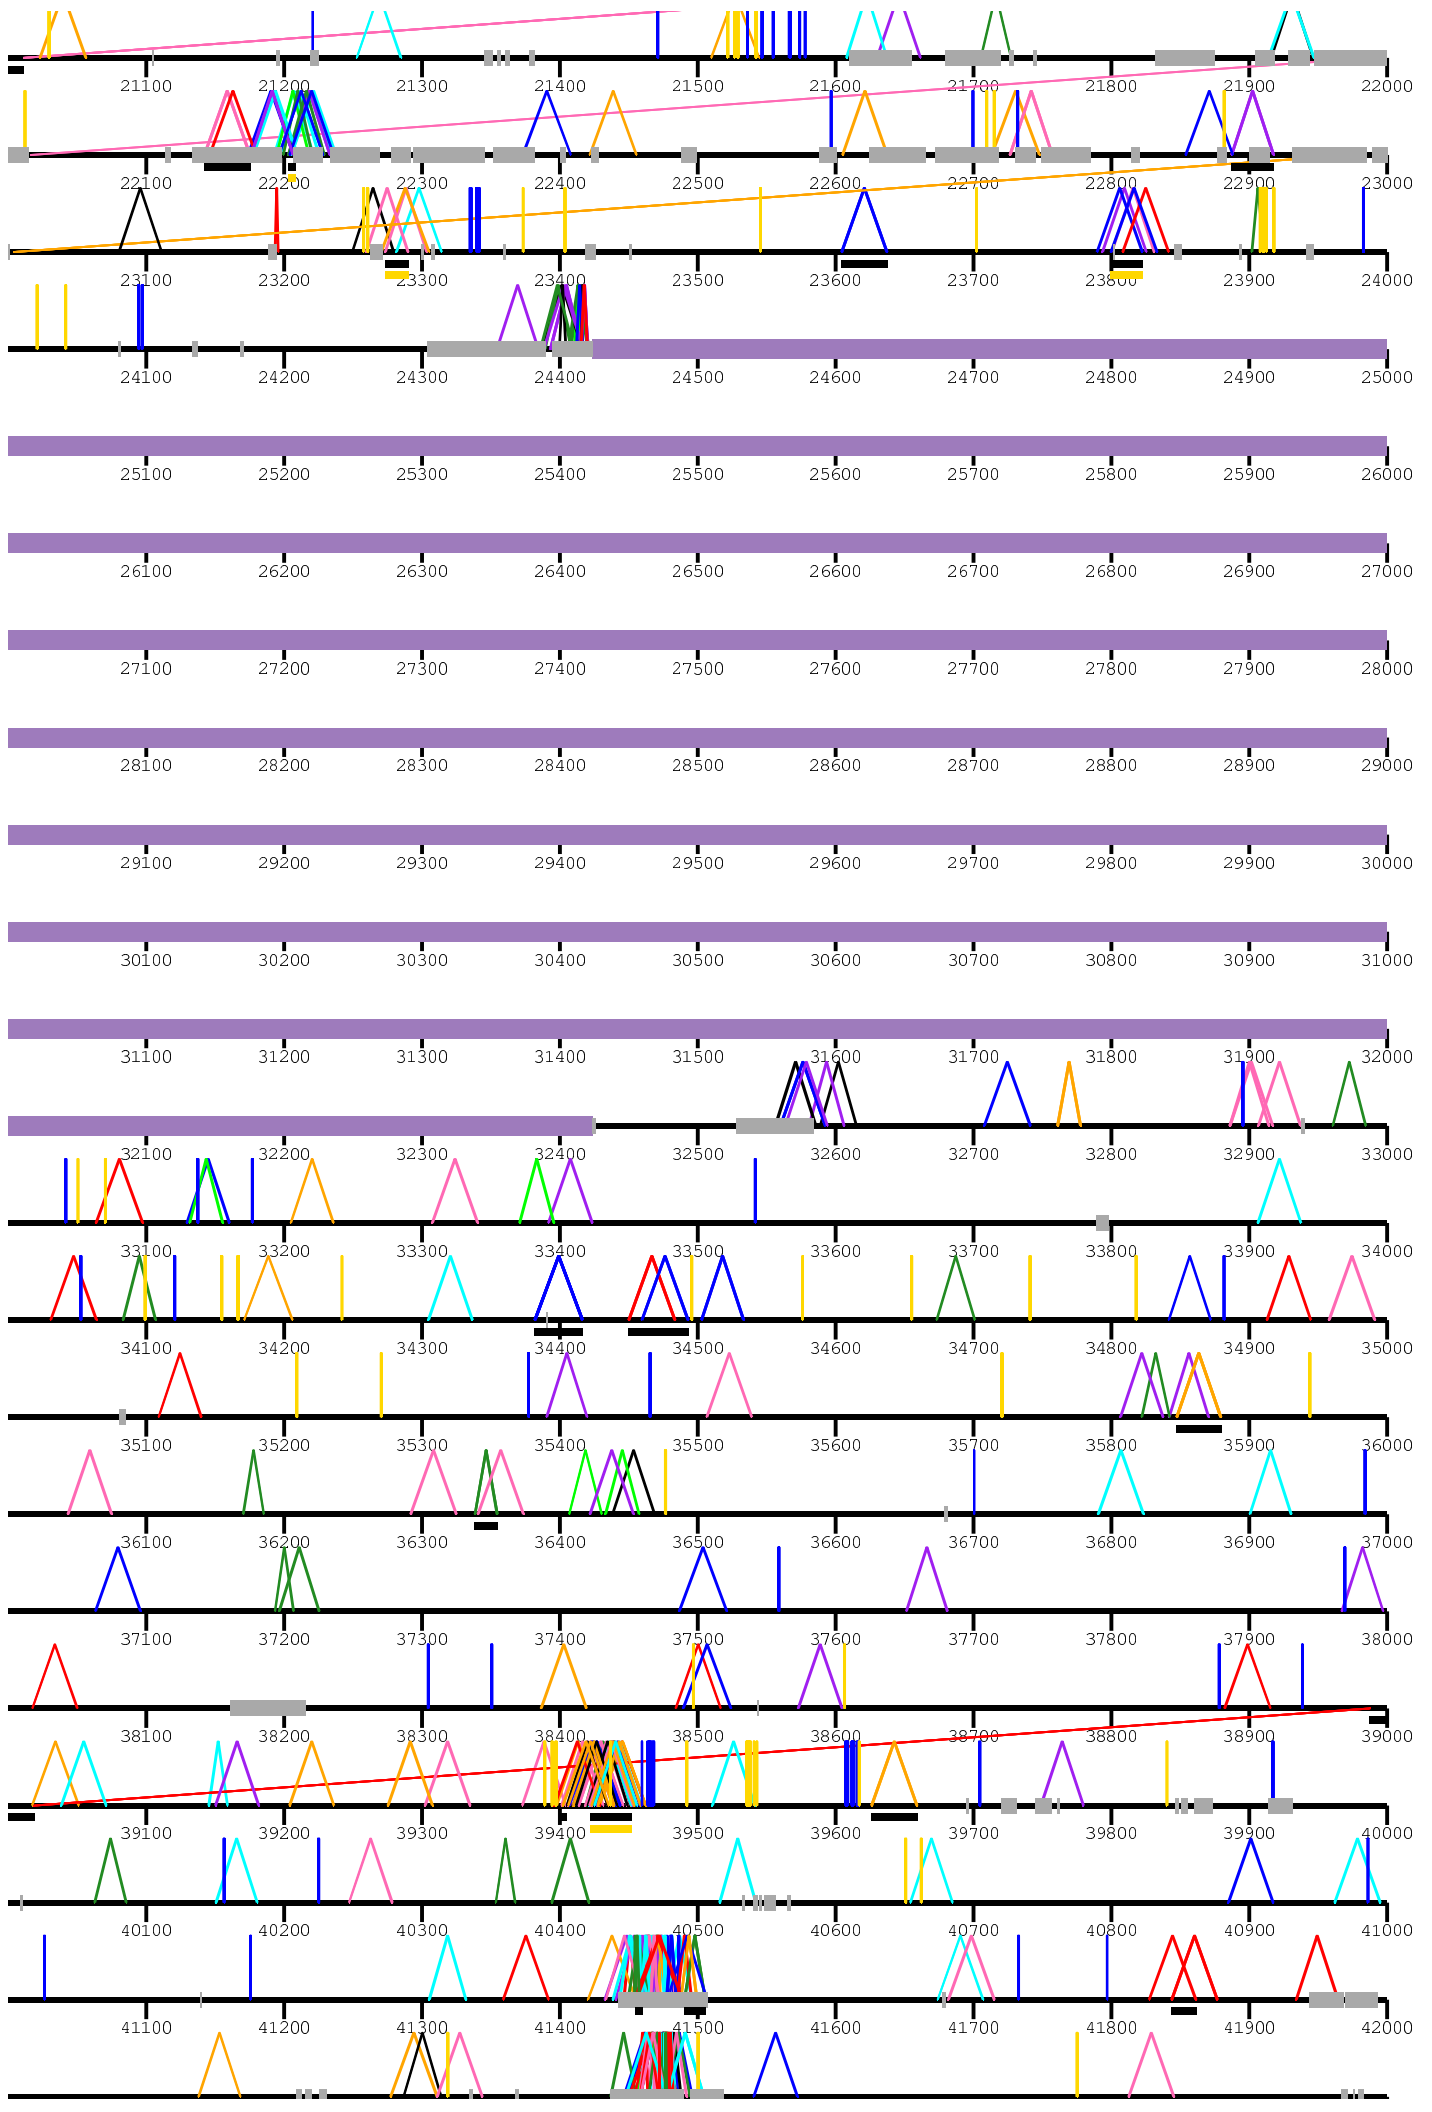

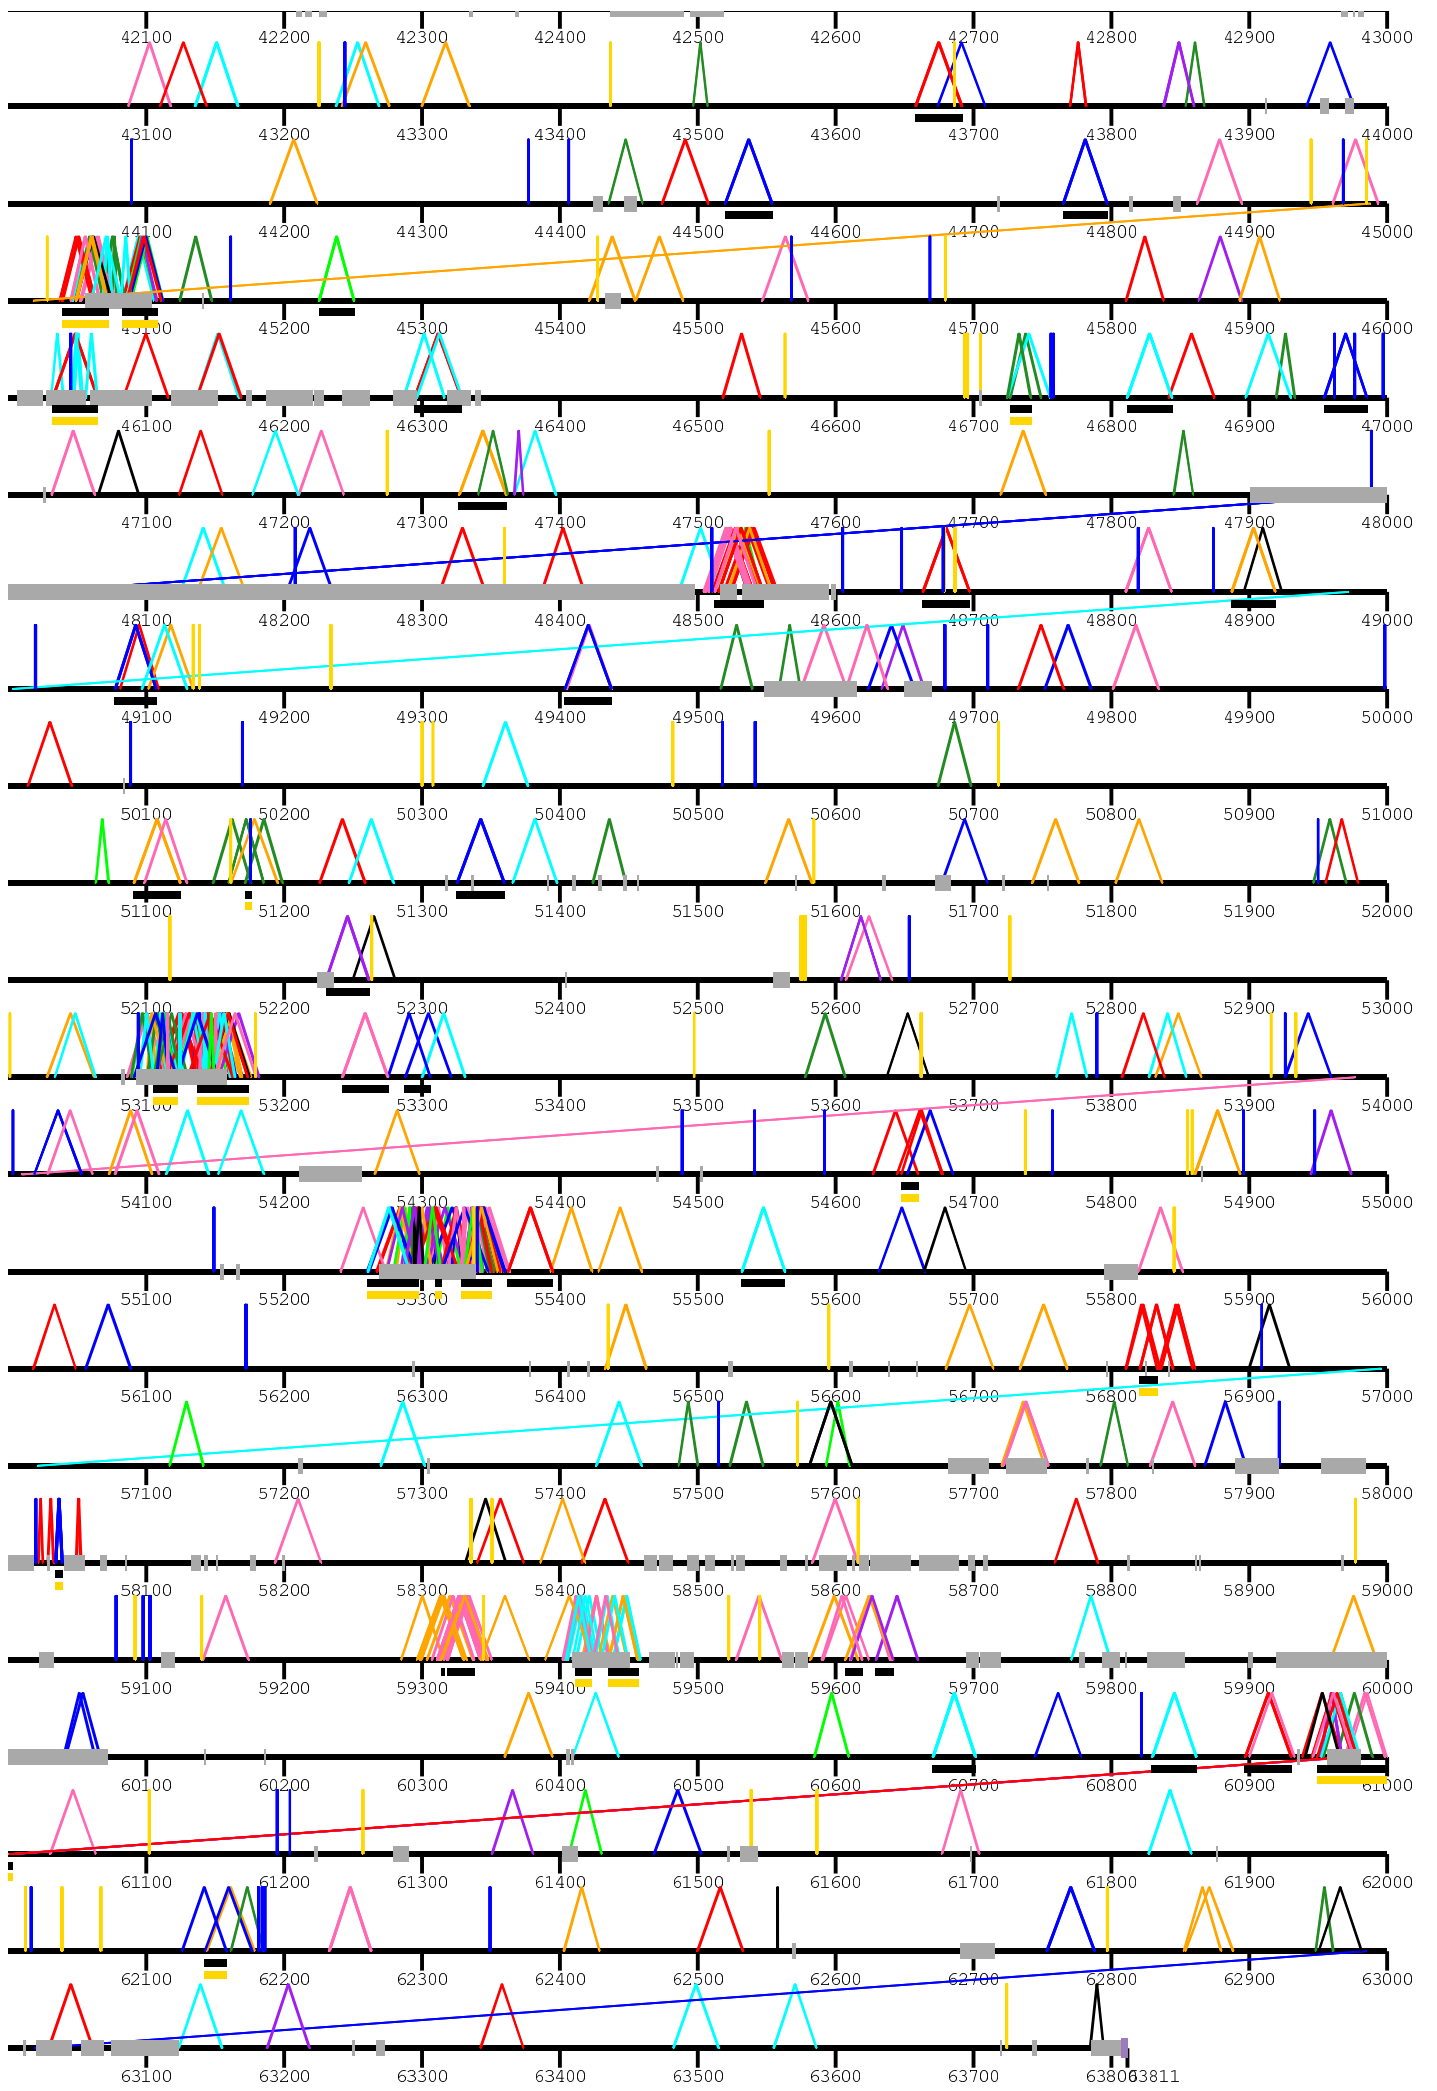

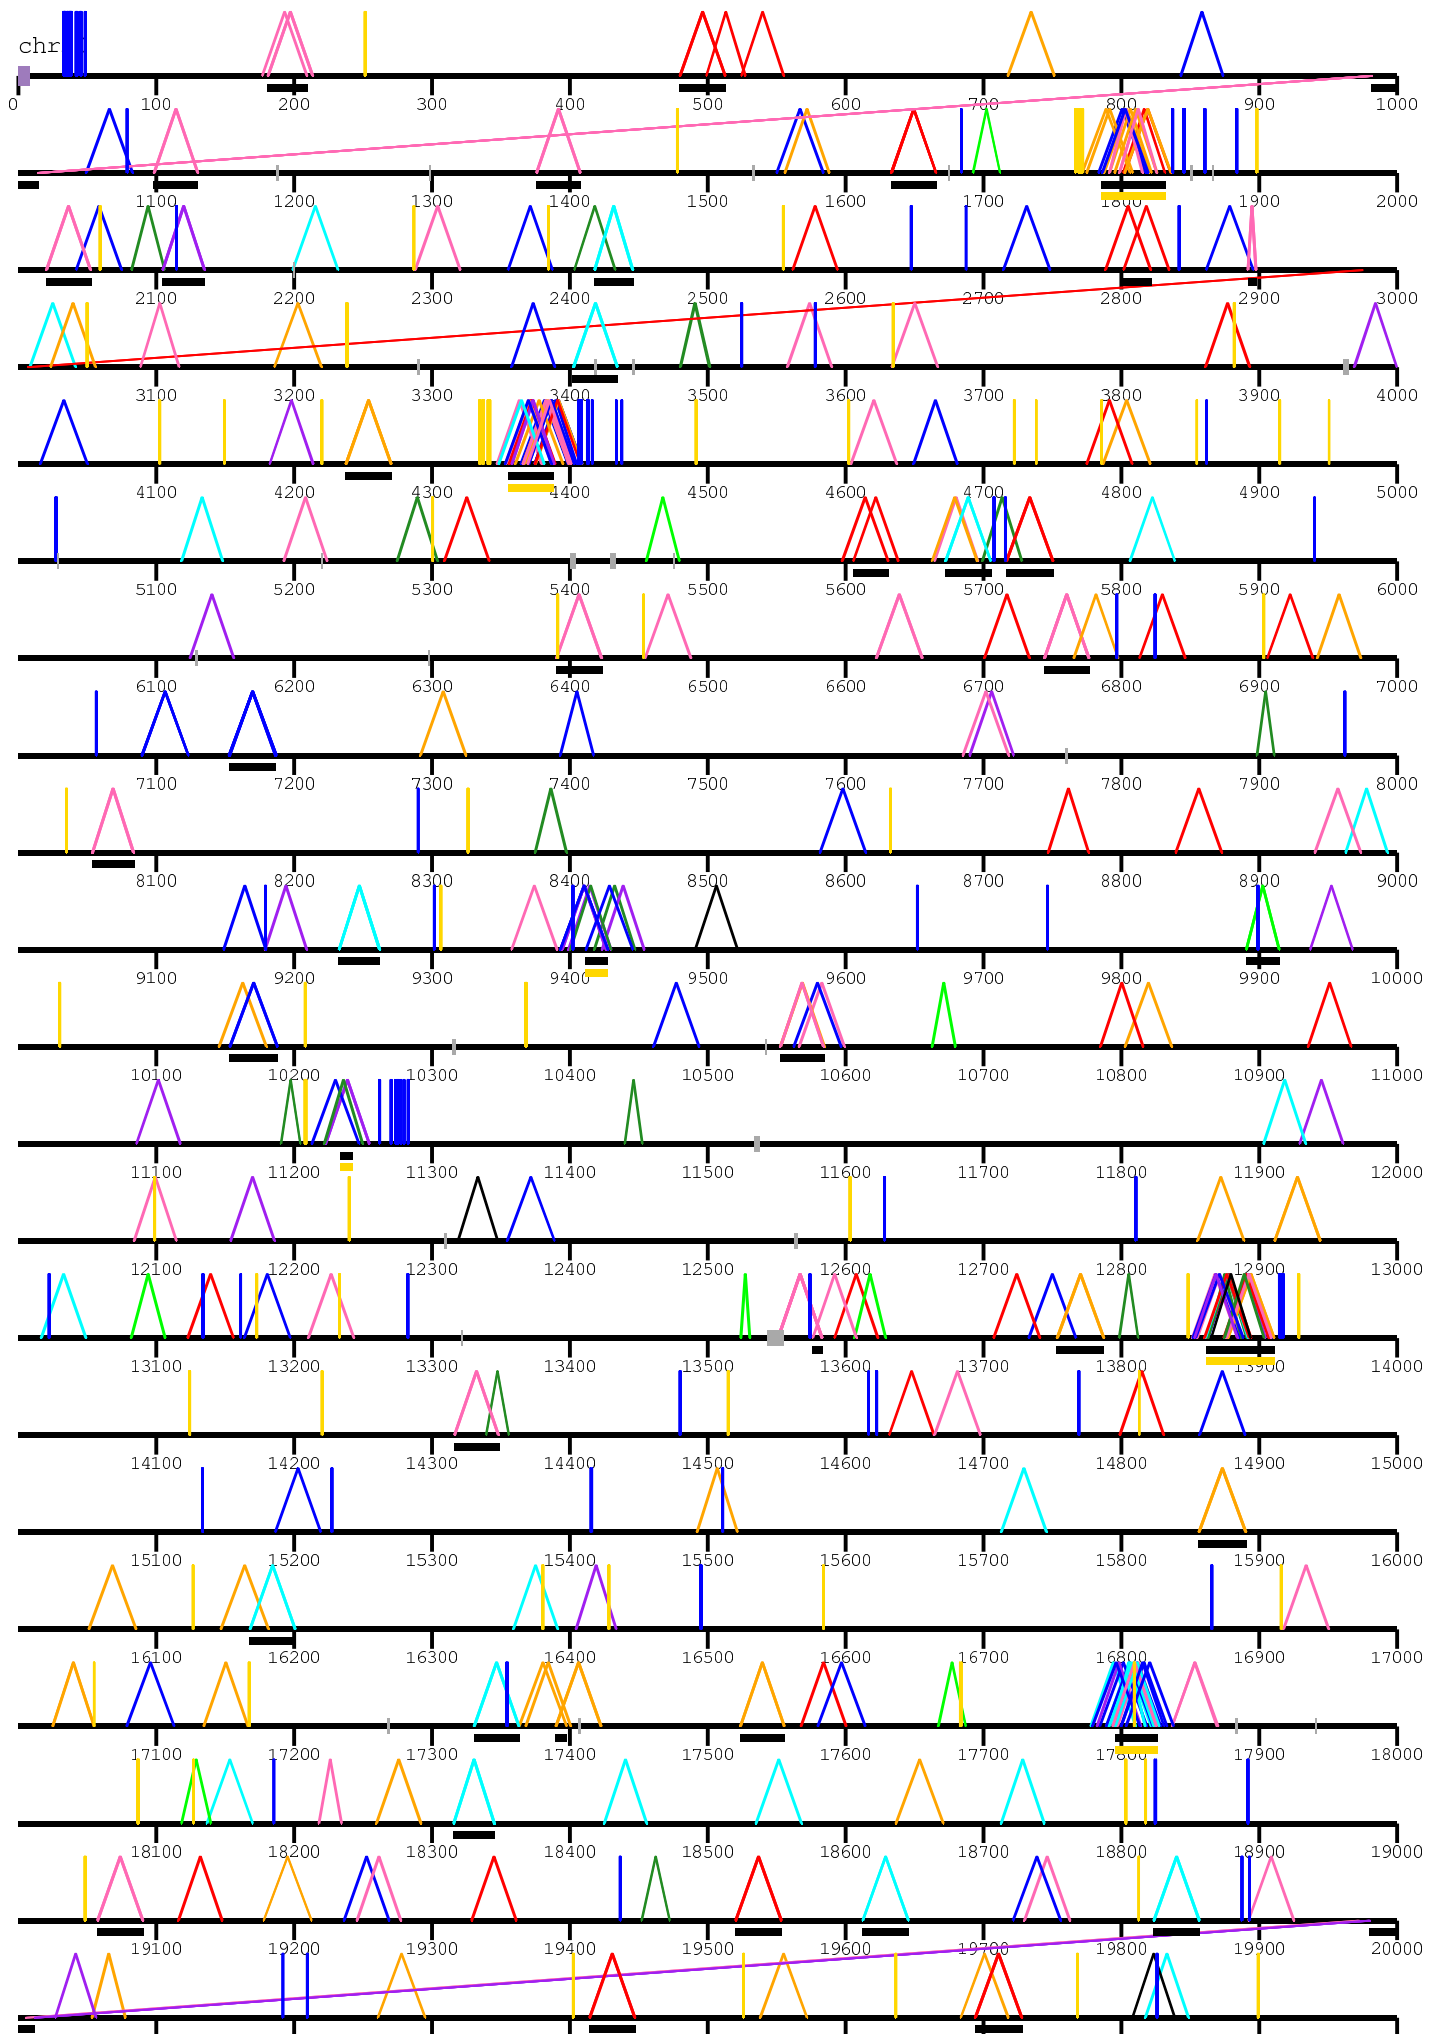

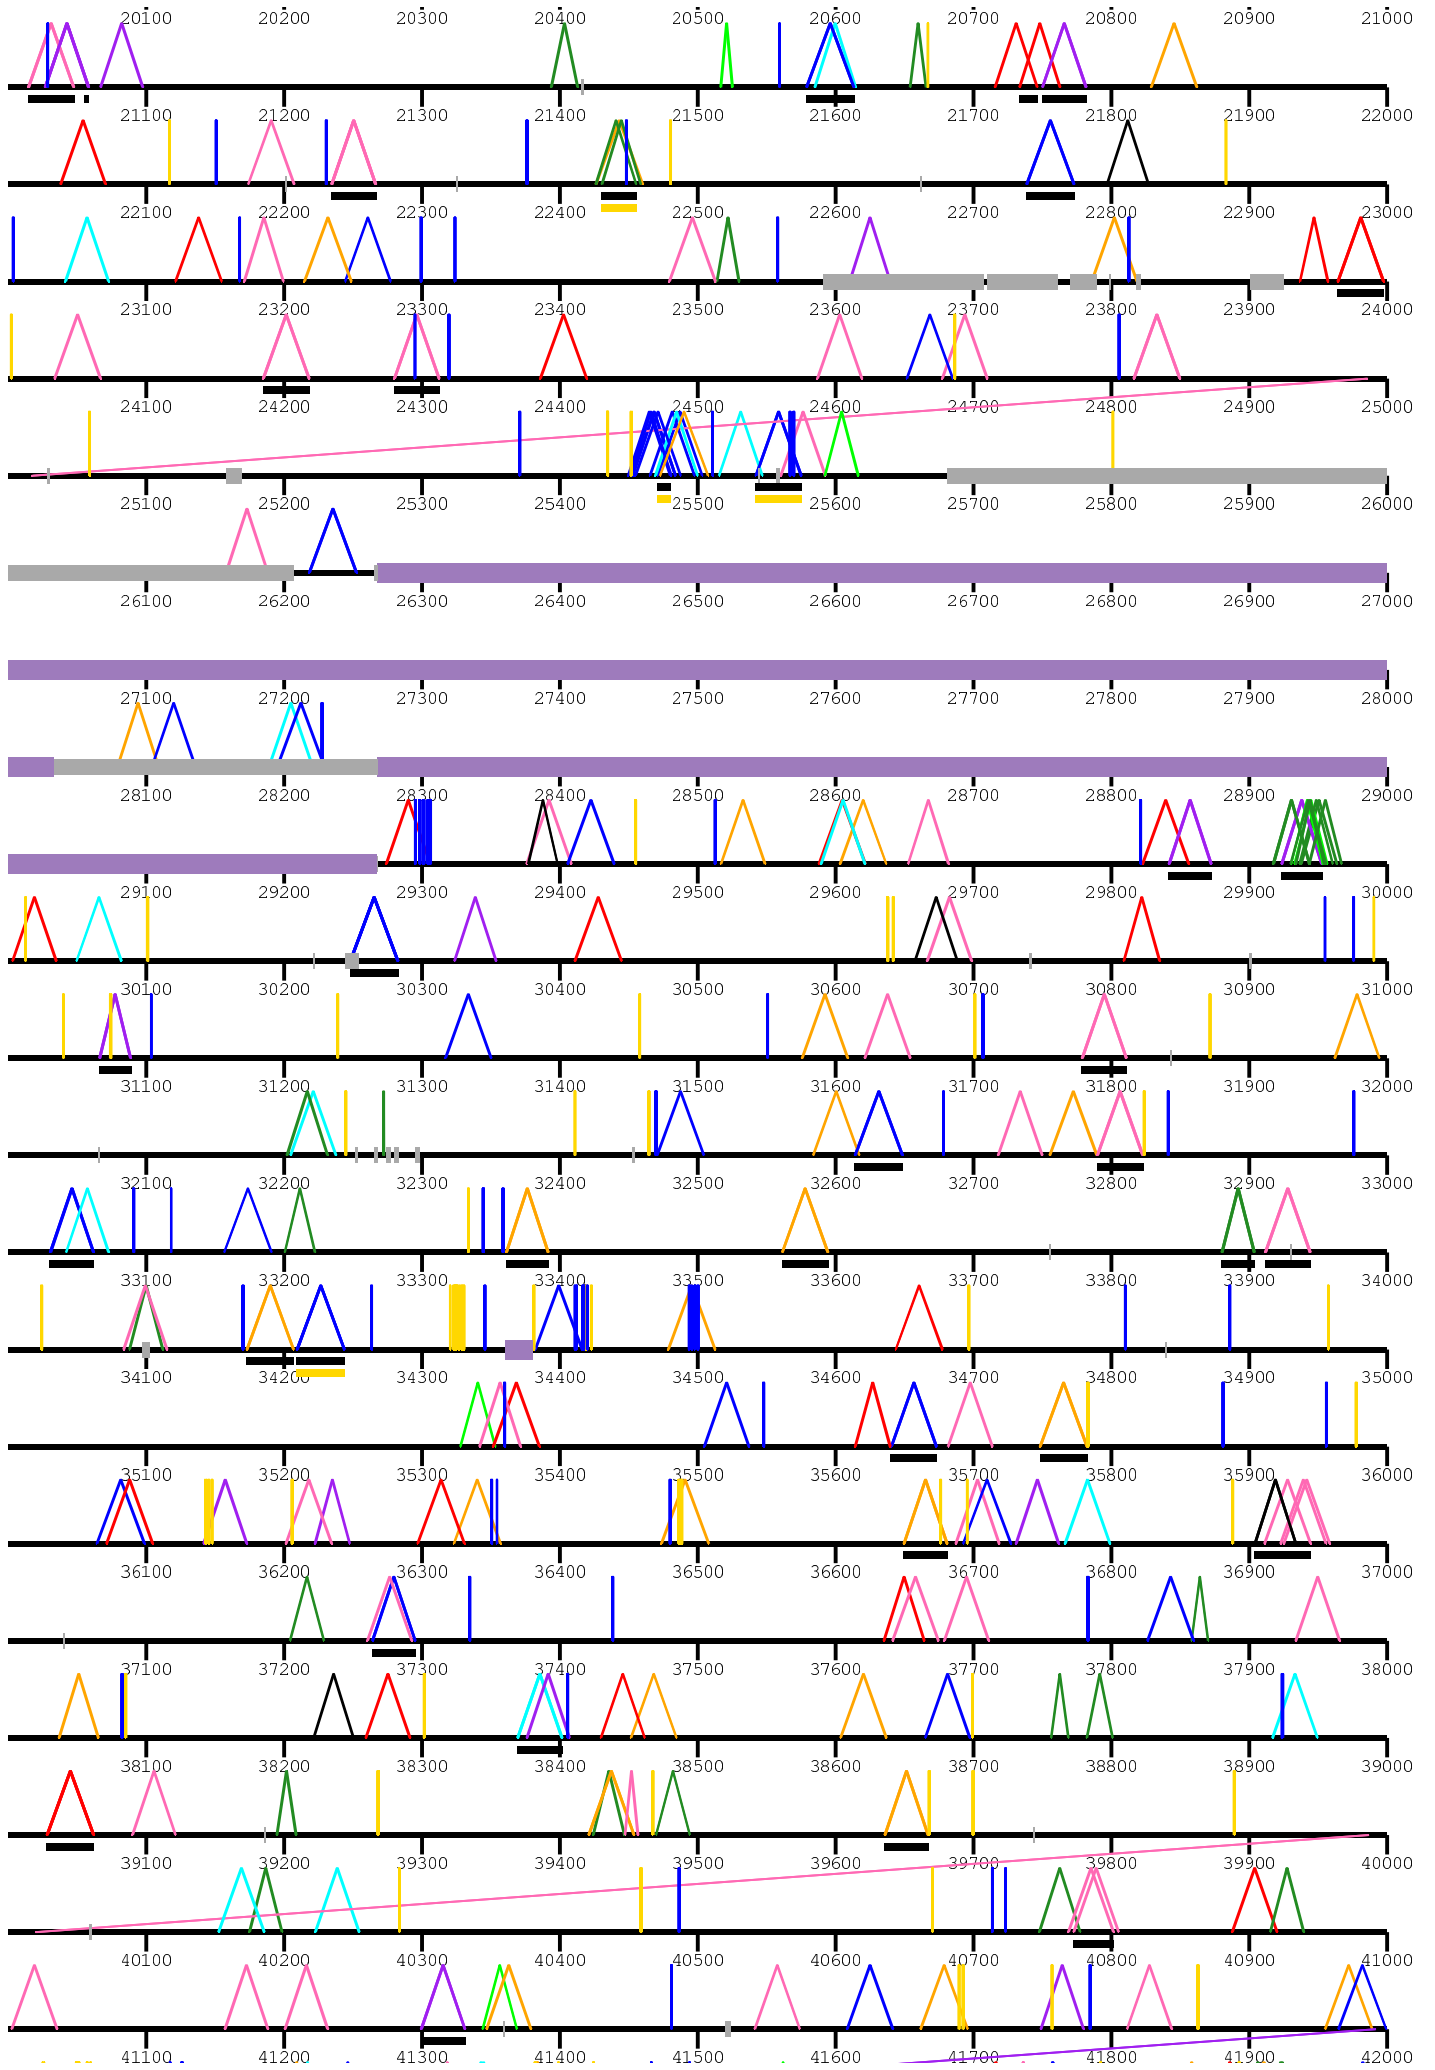



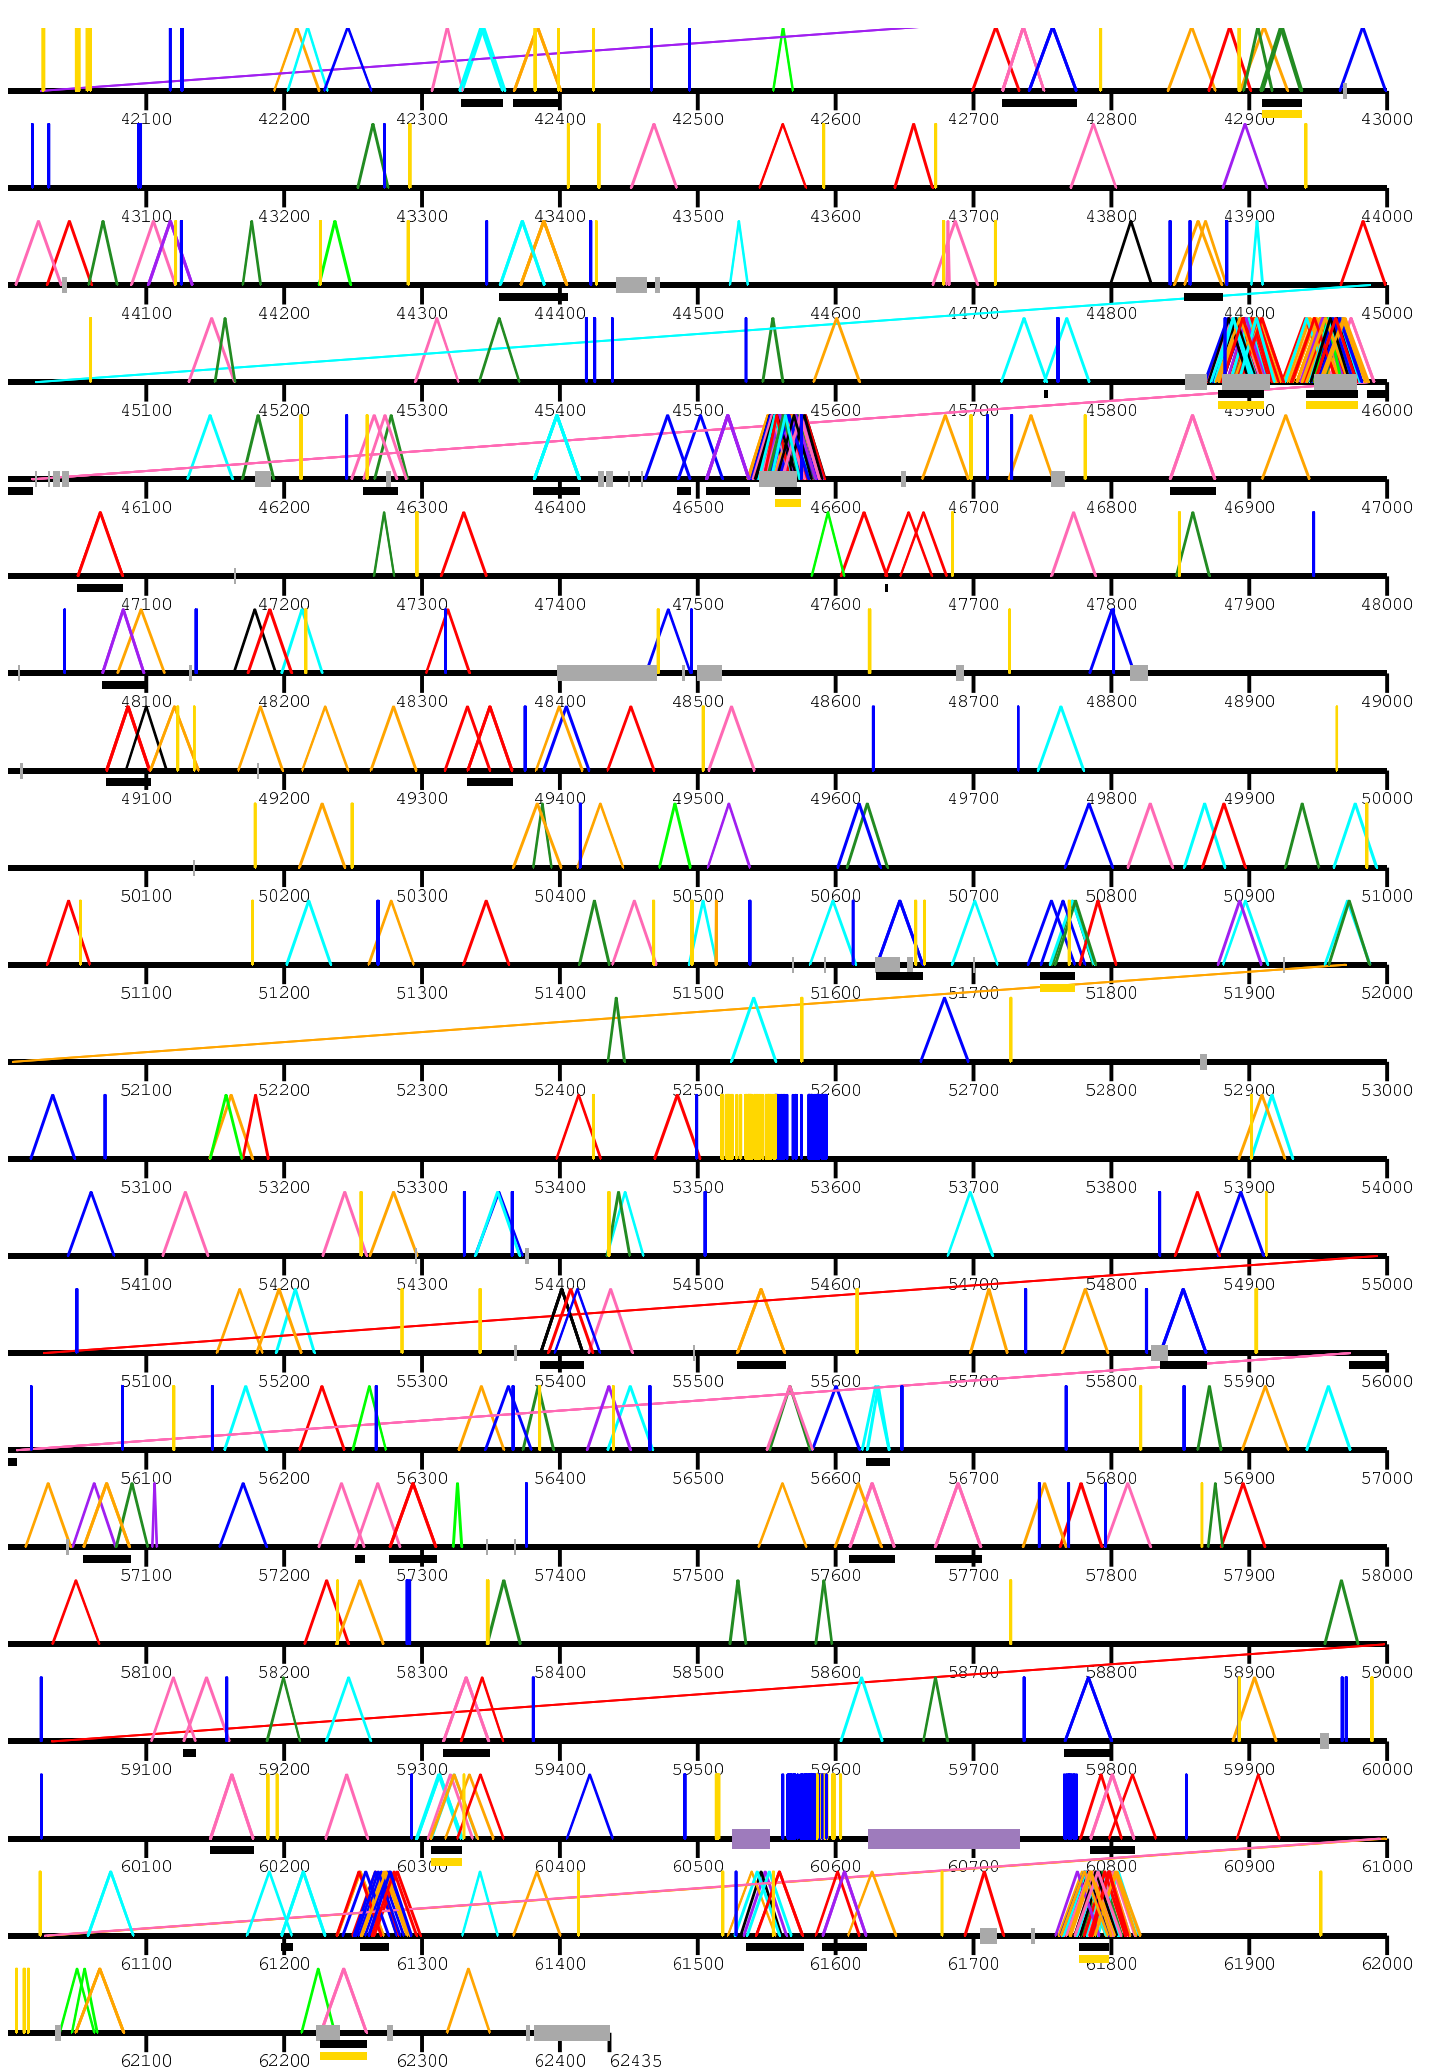

chr21

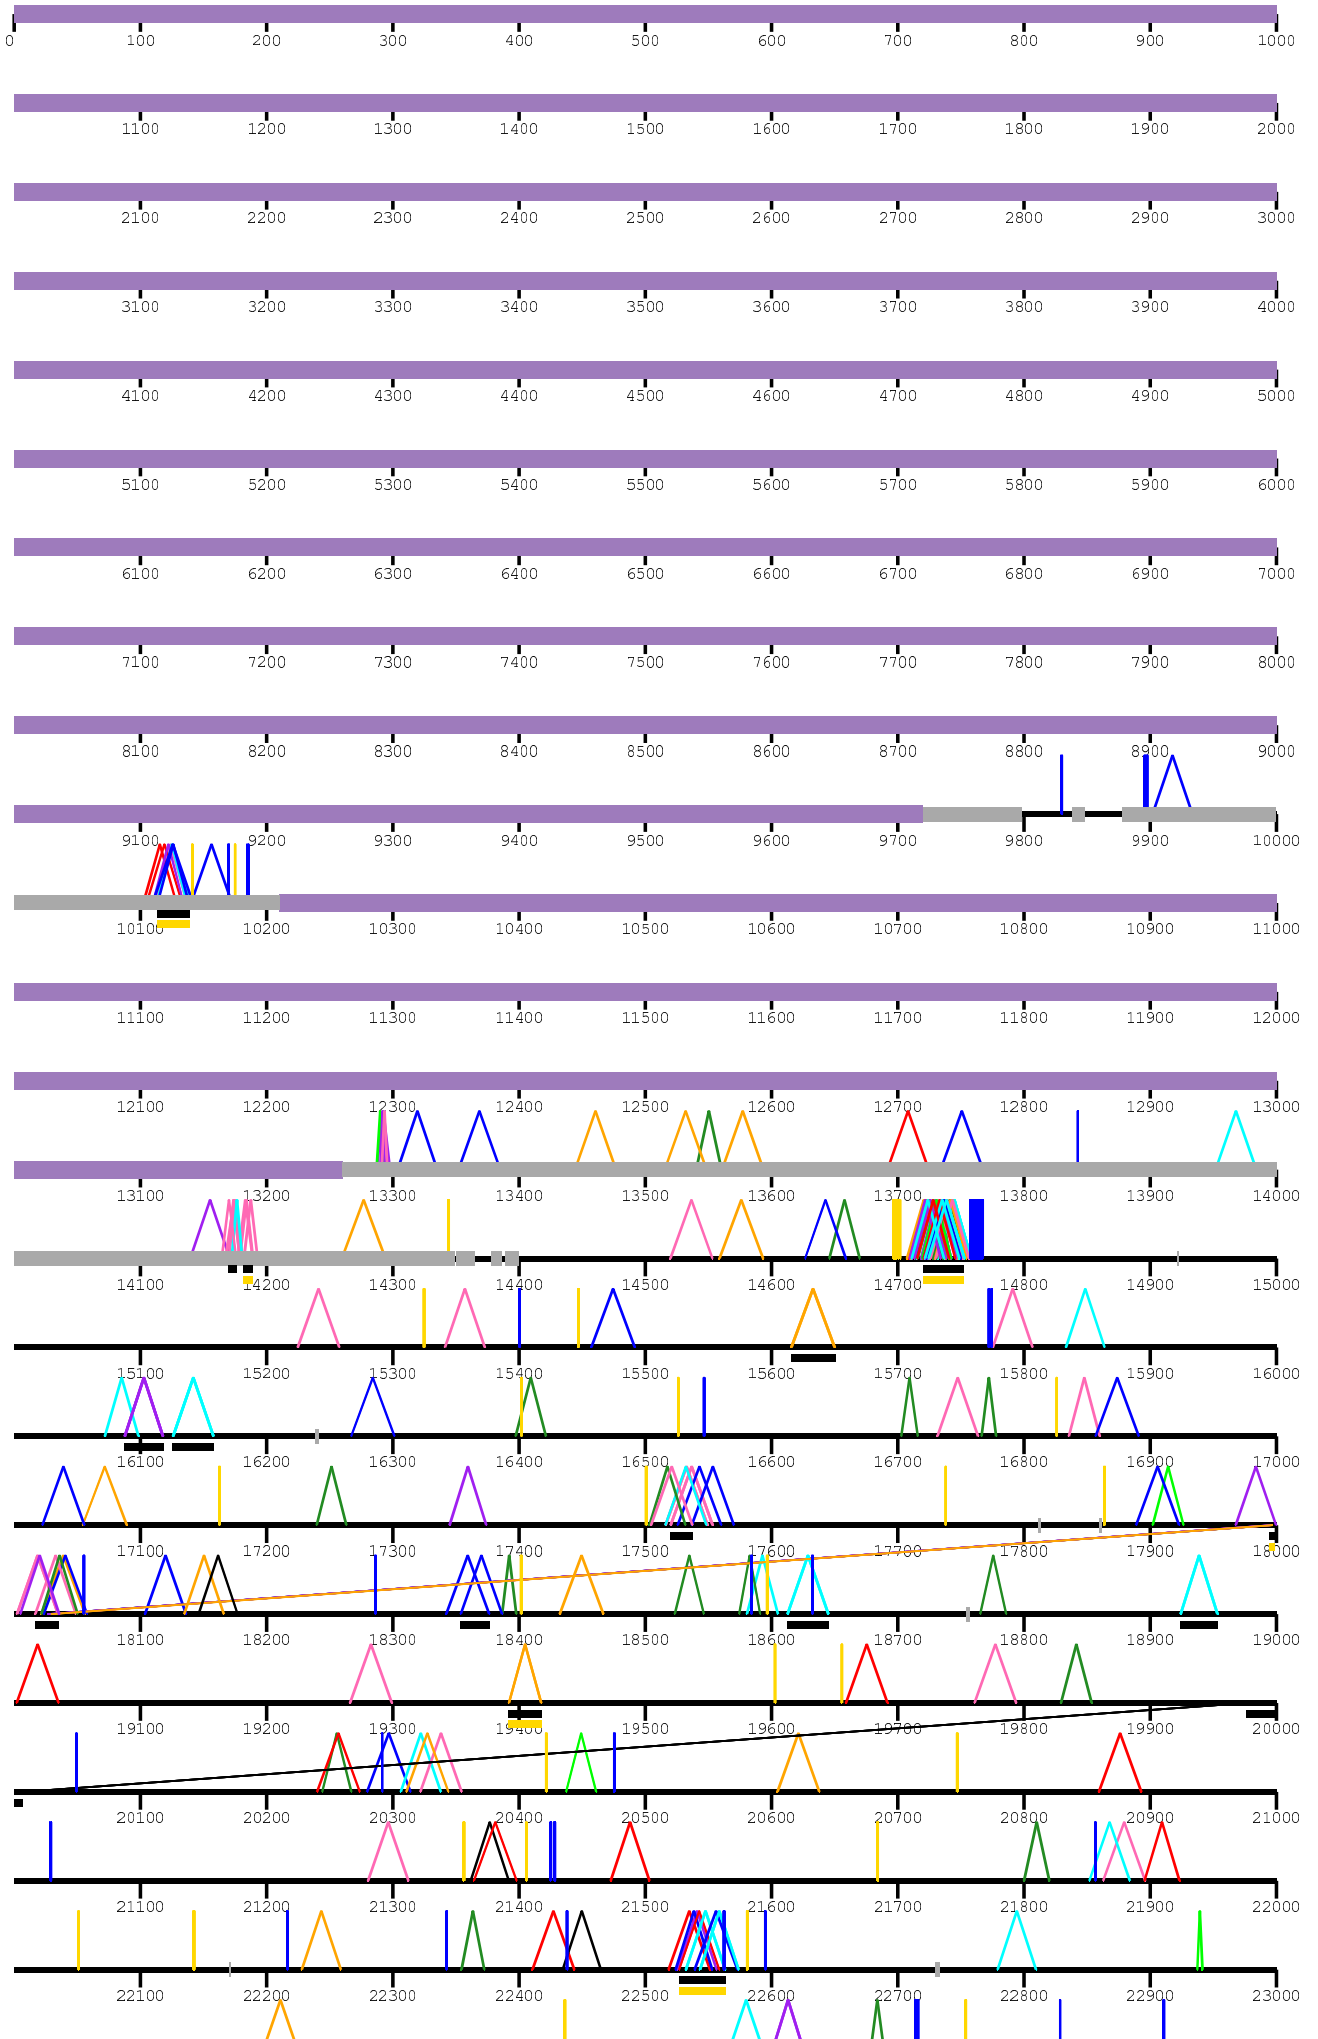

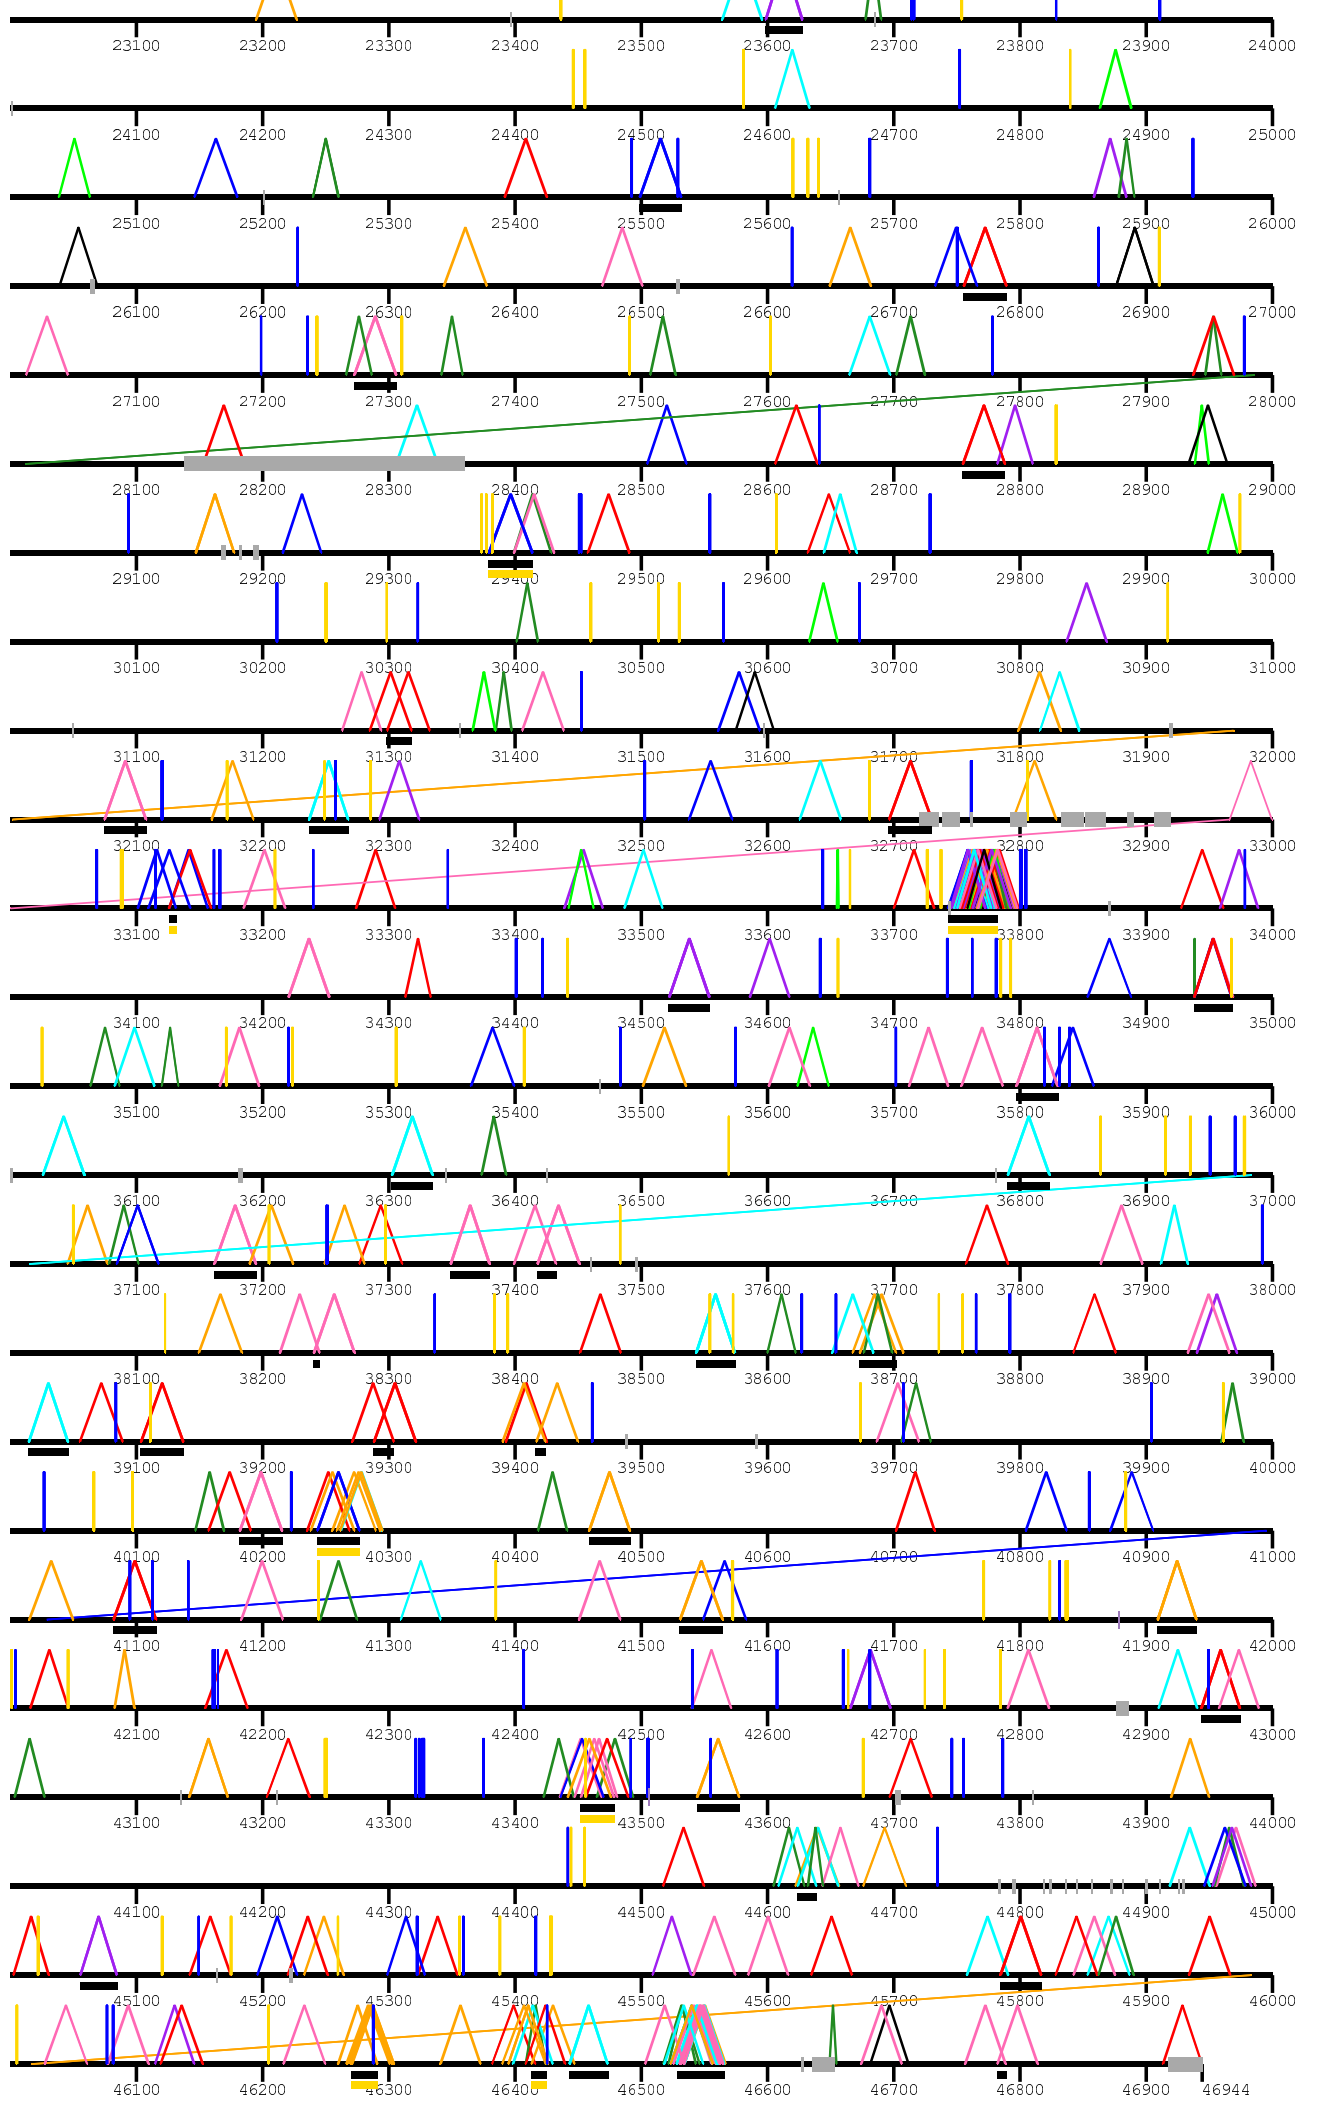

chr22

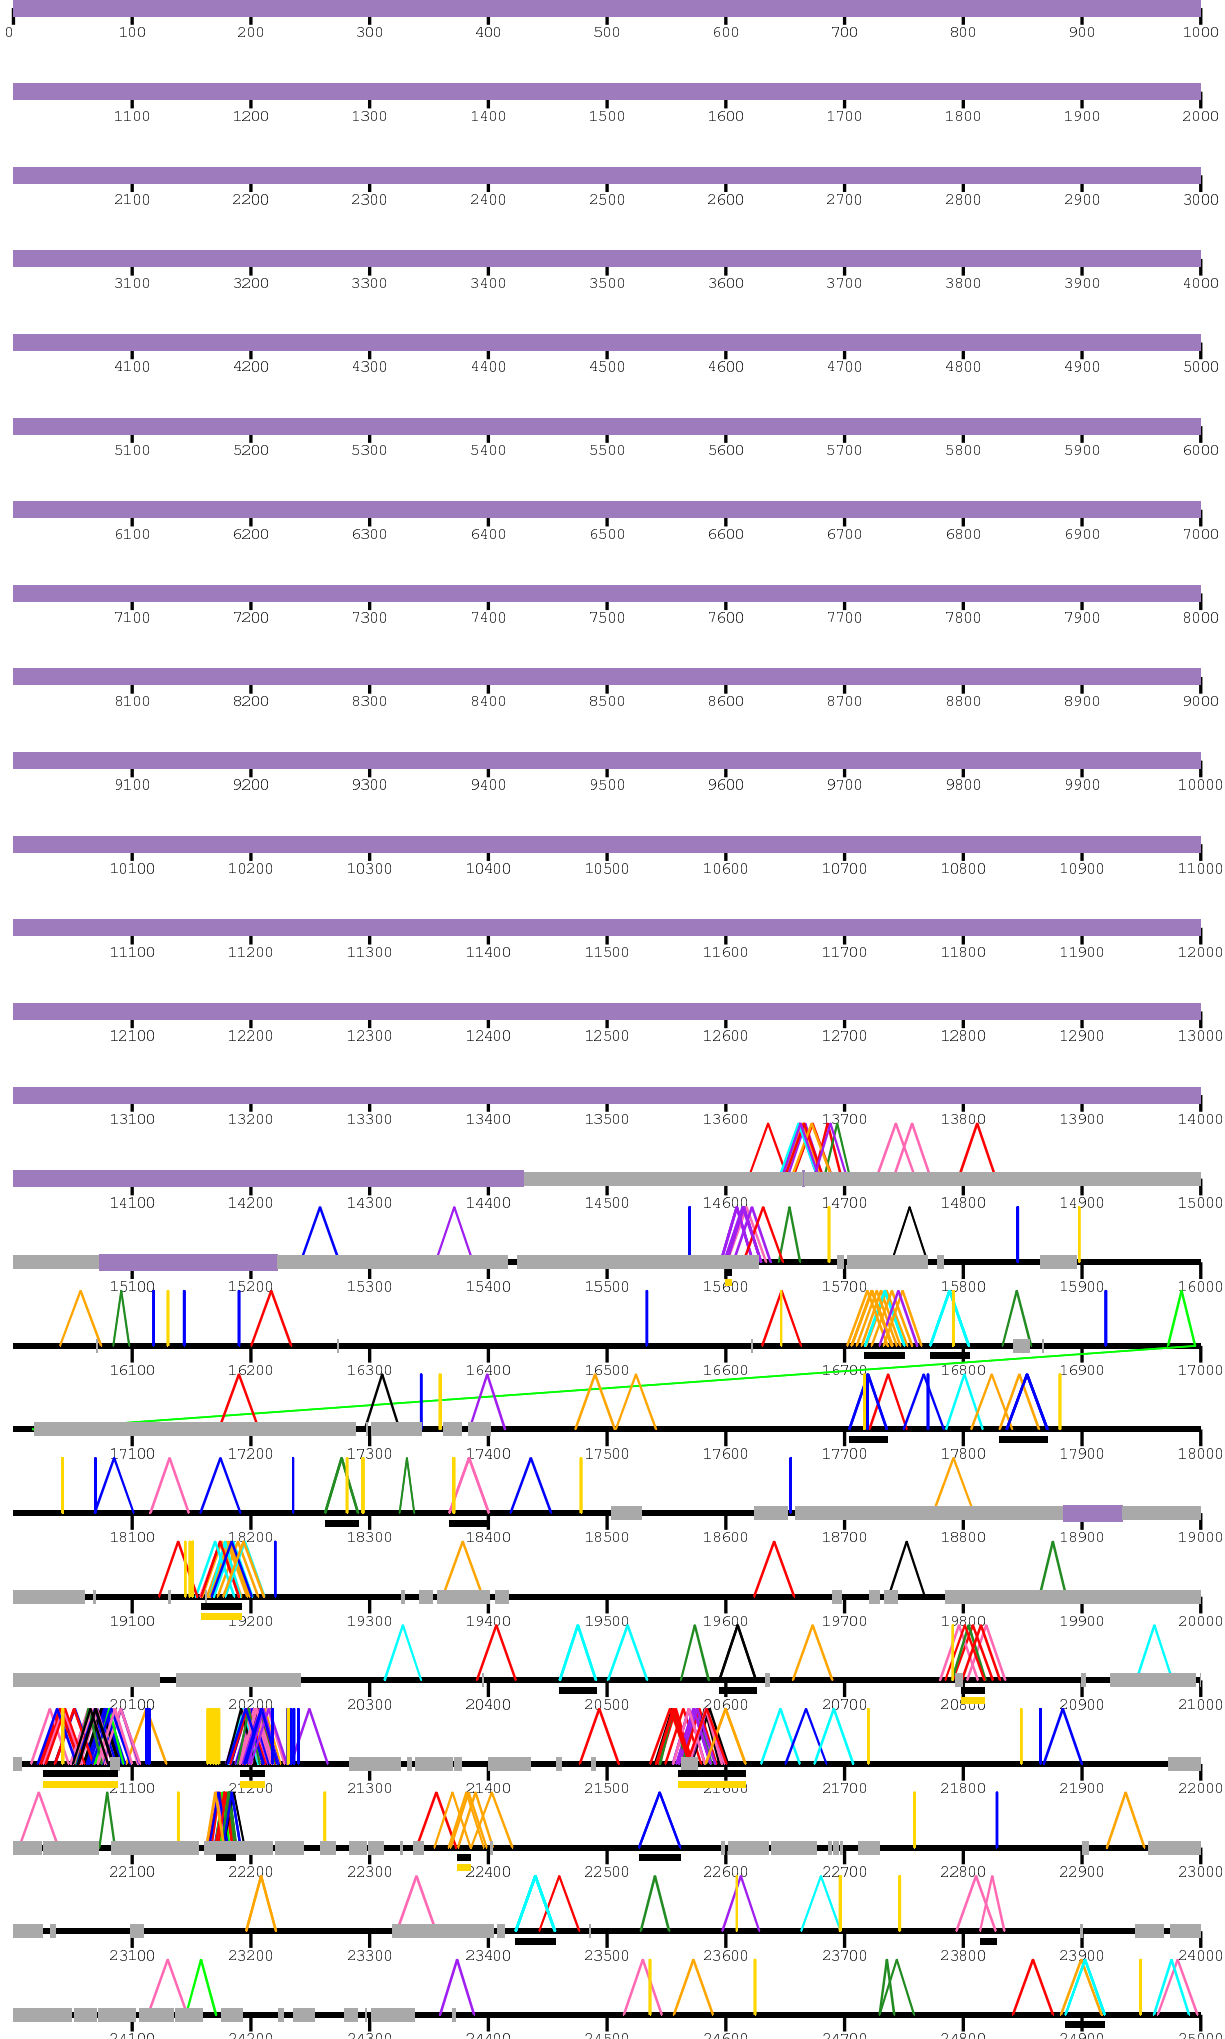

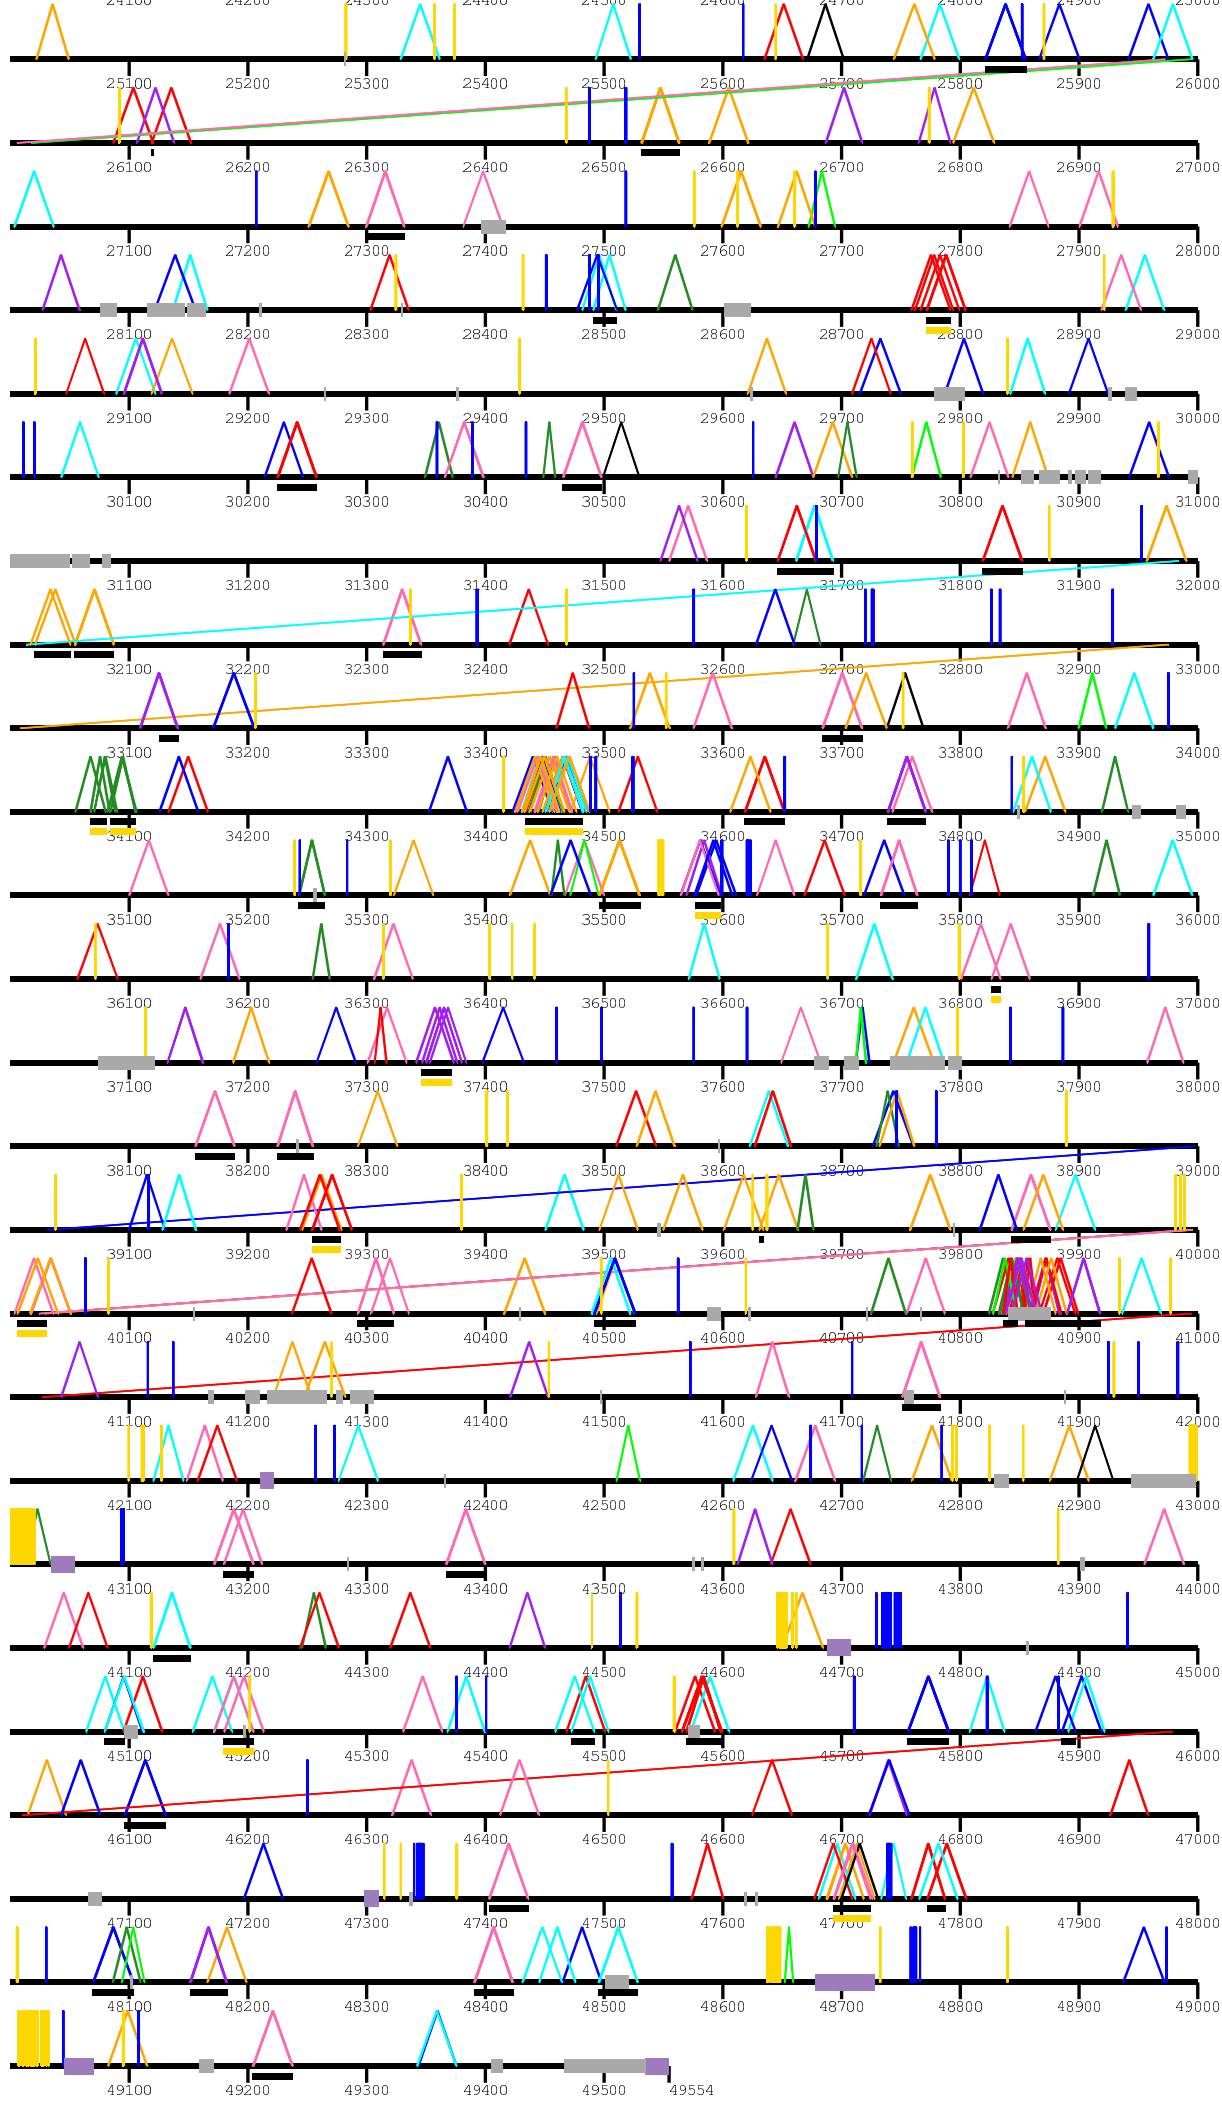

chrX

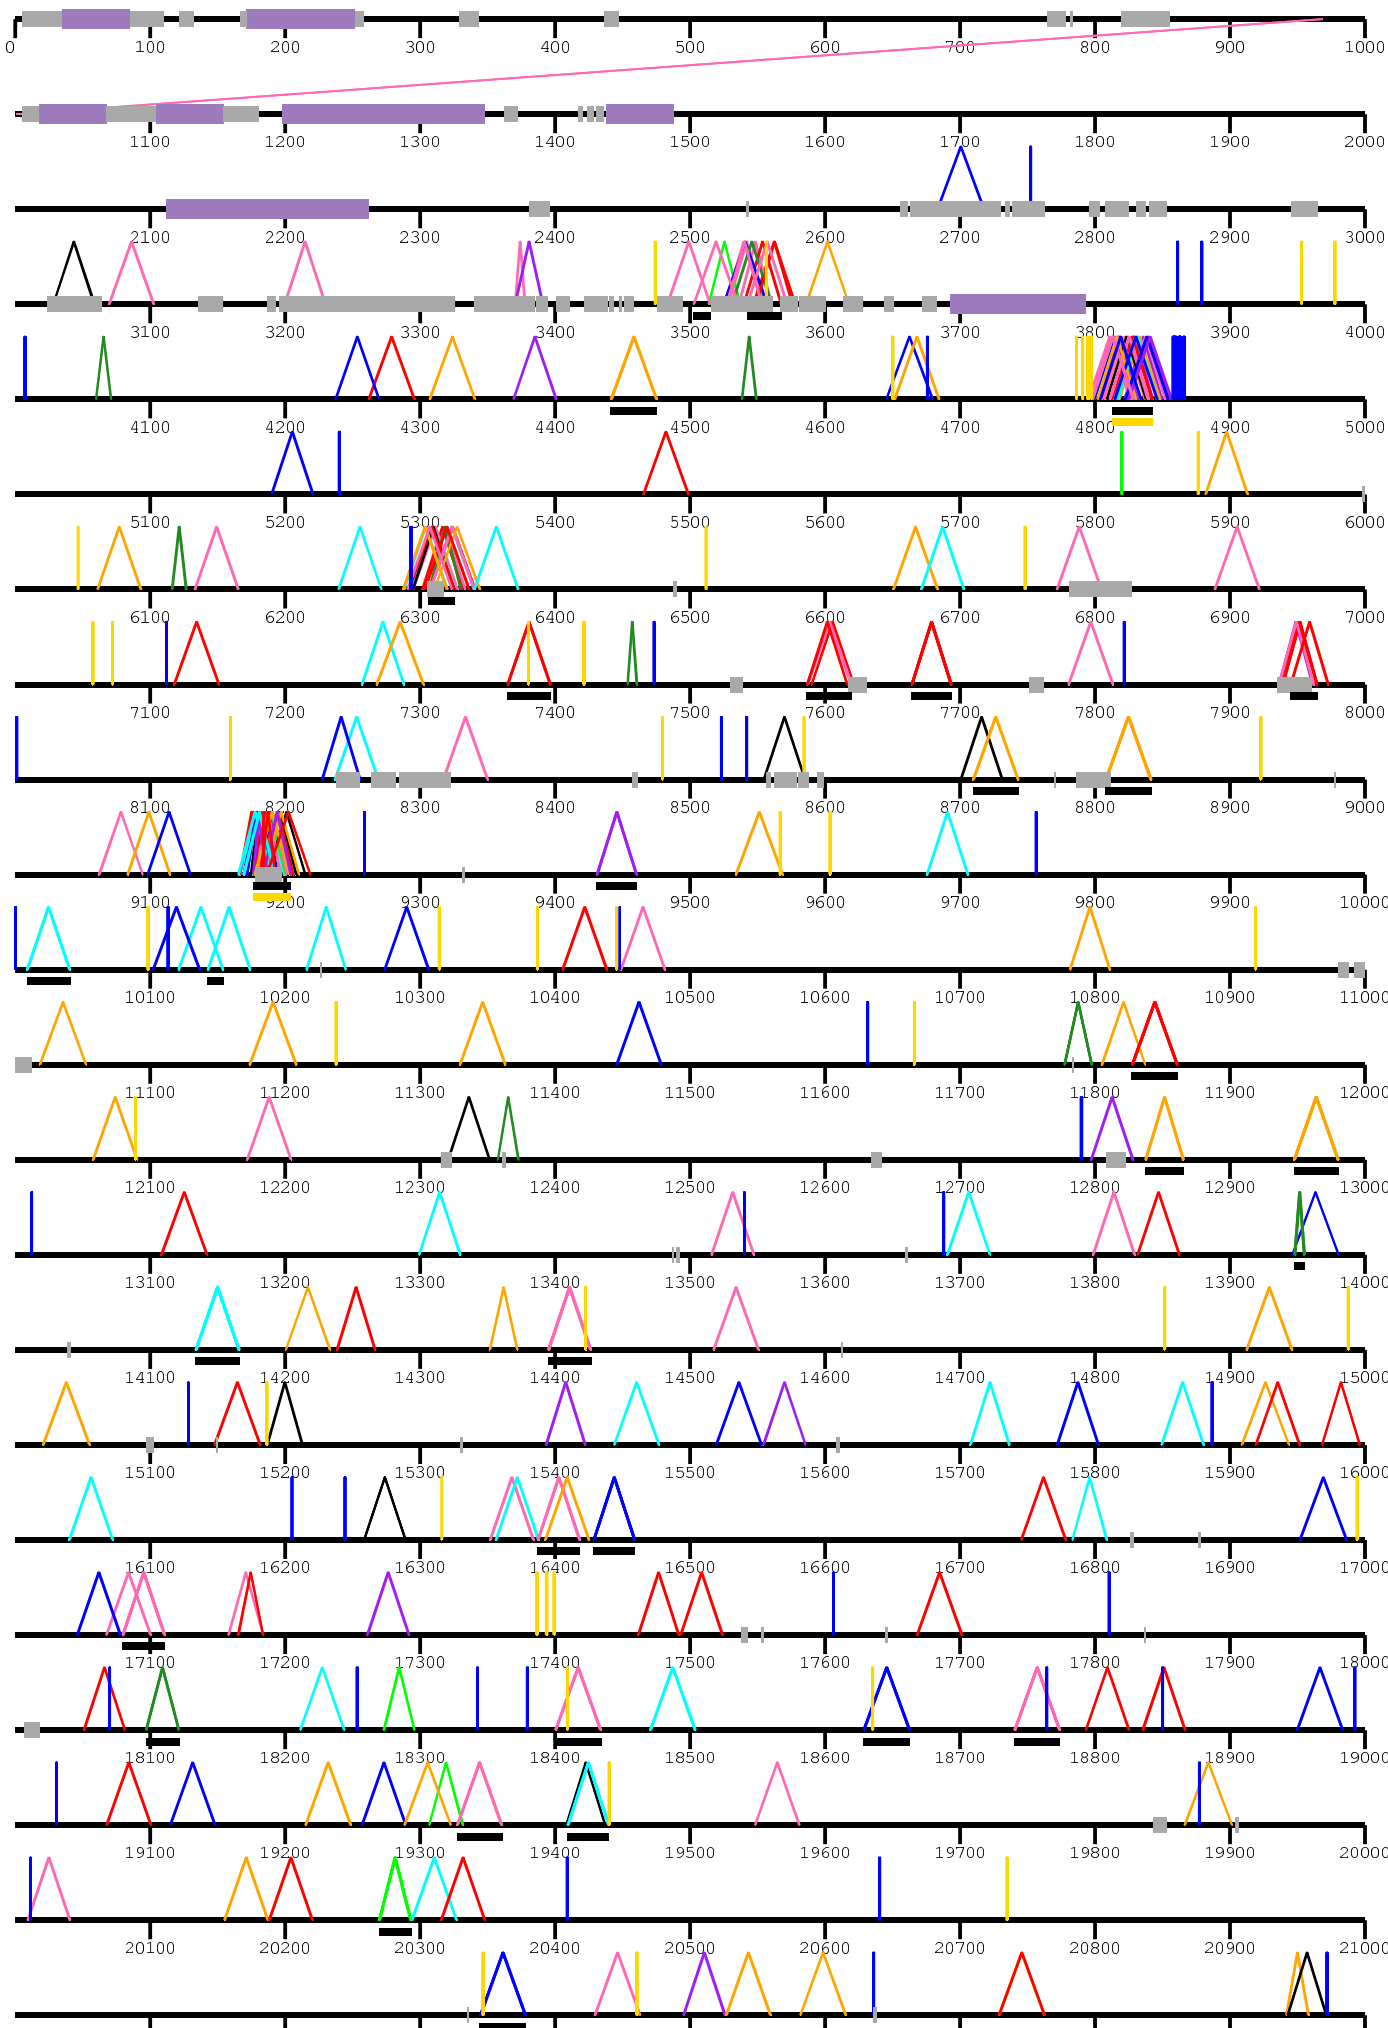

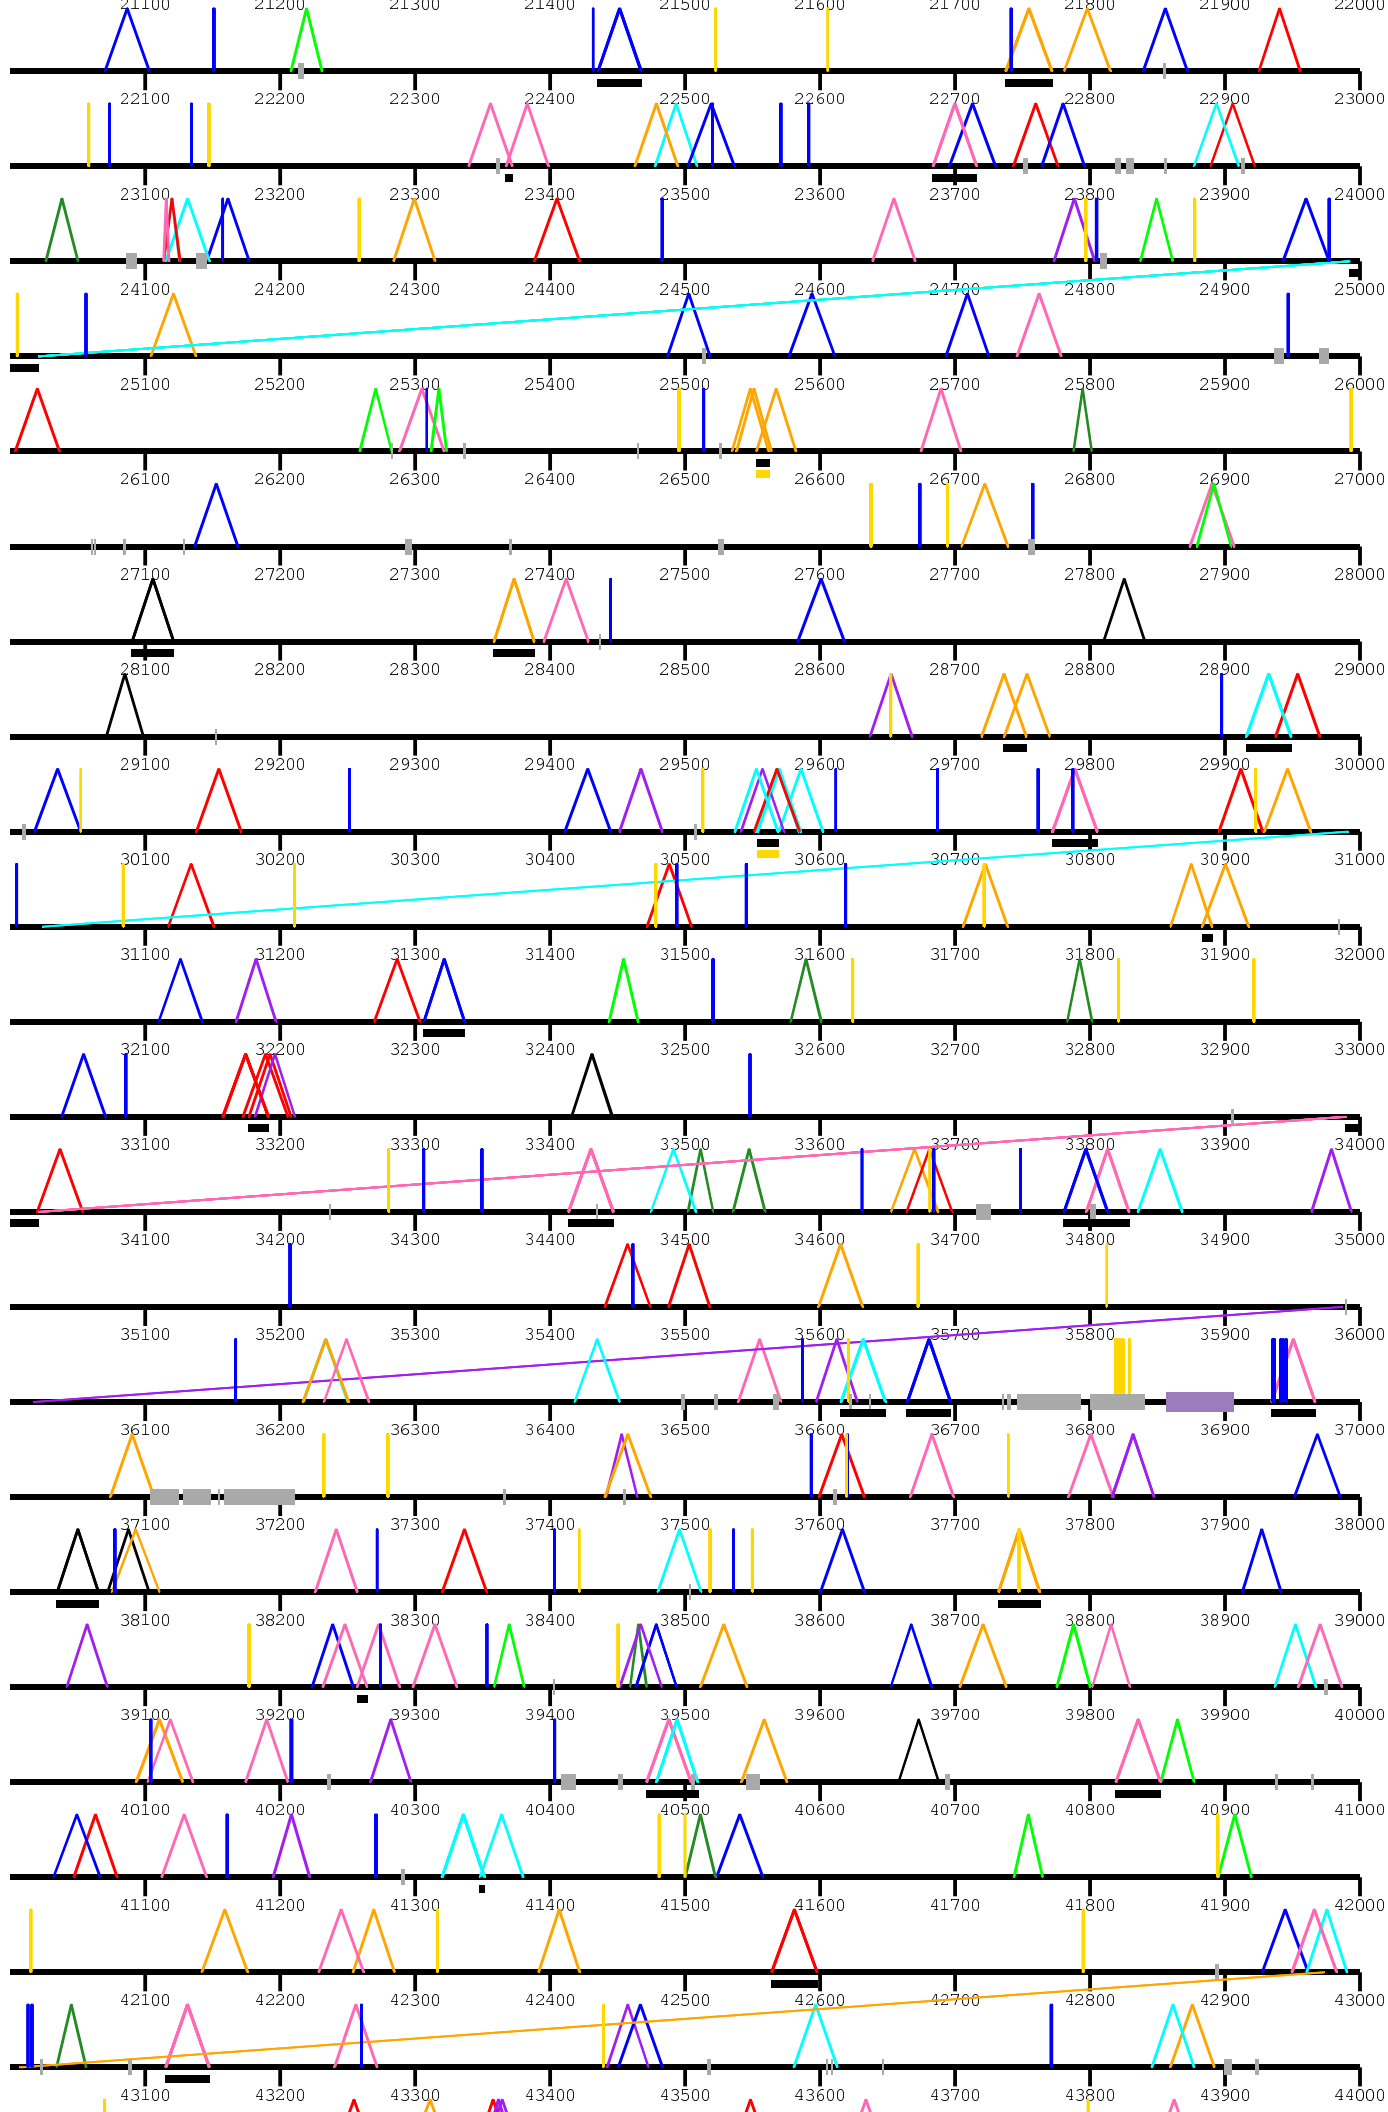

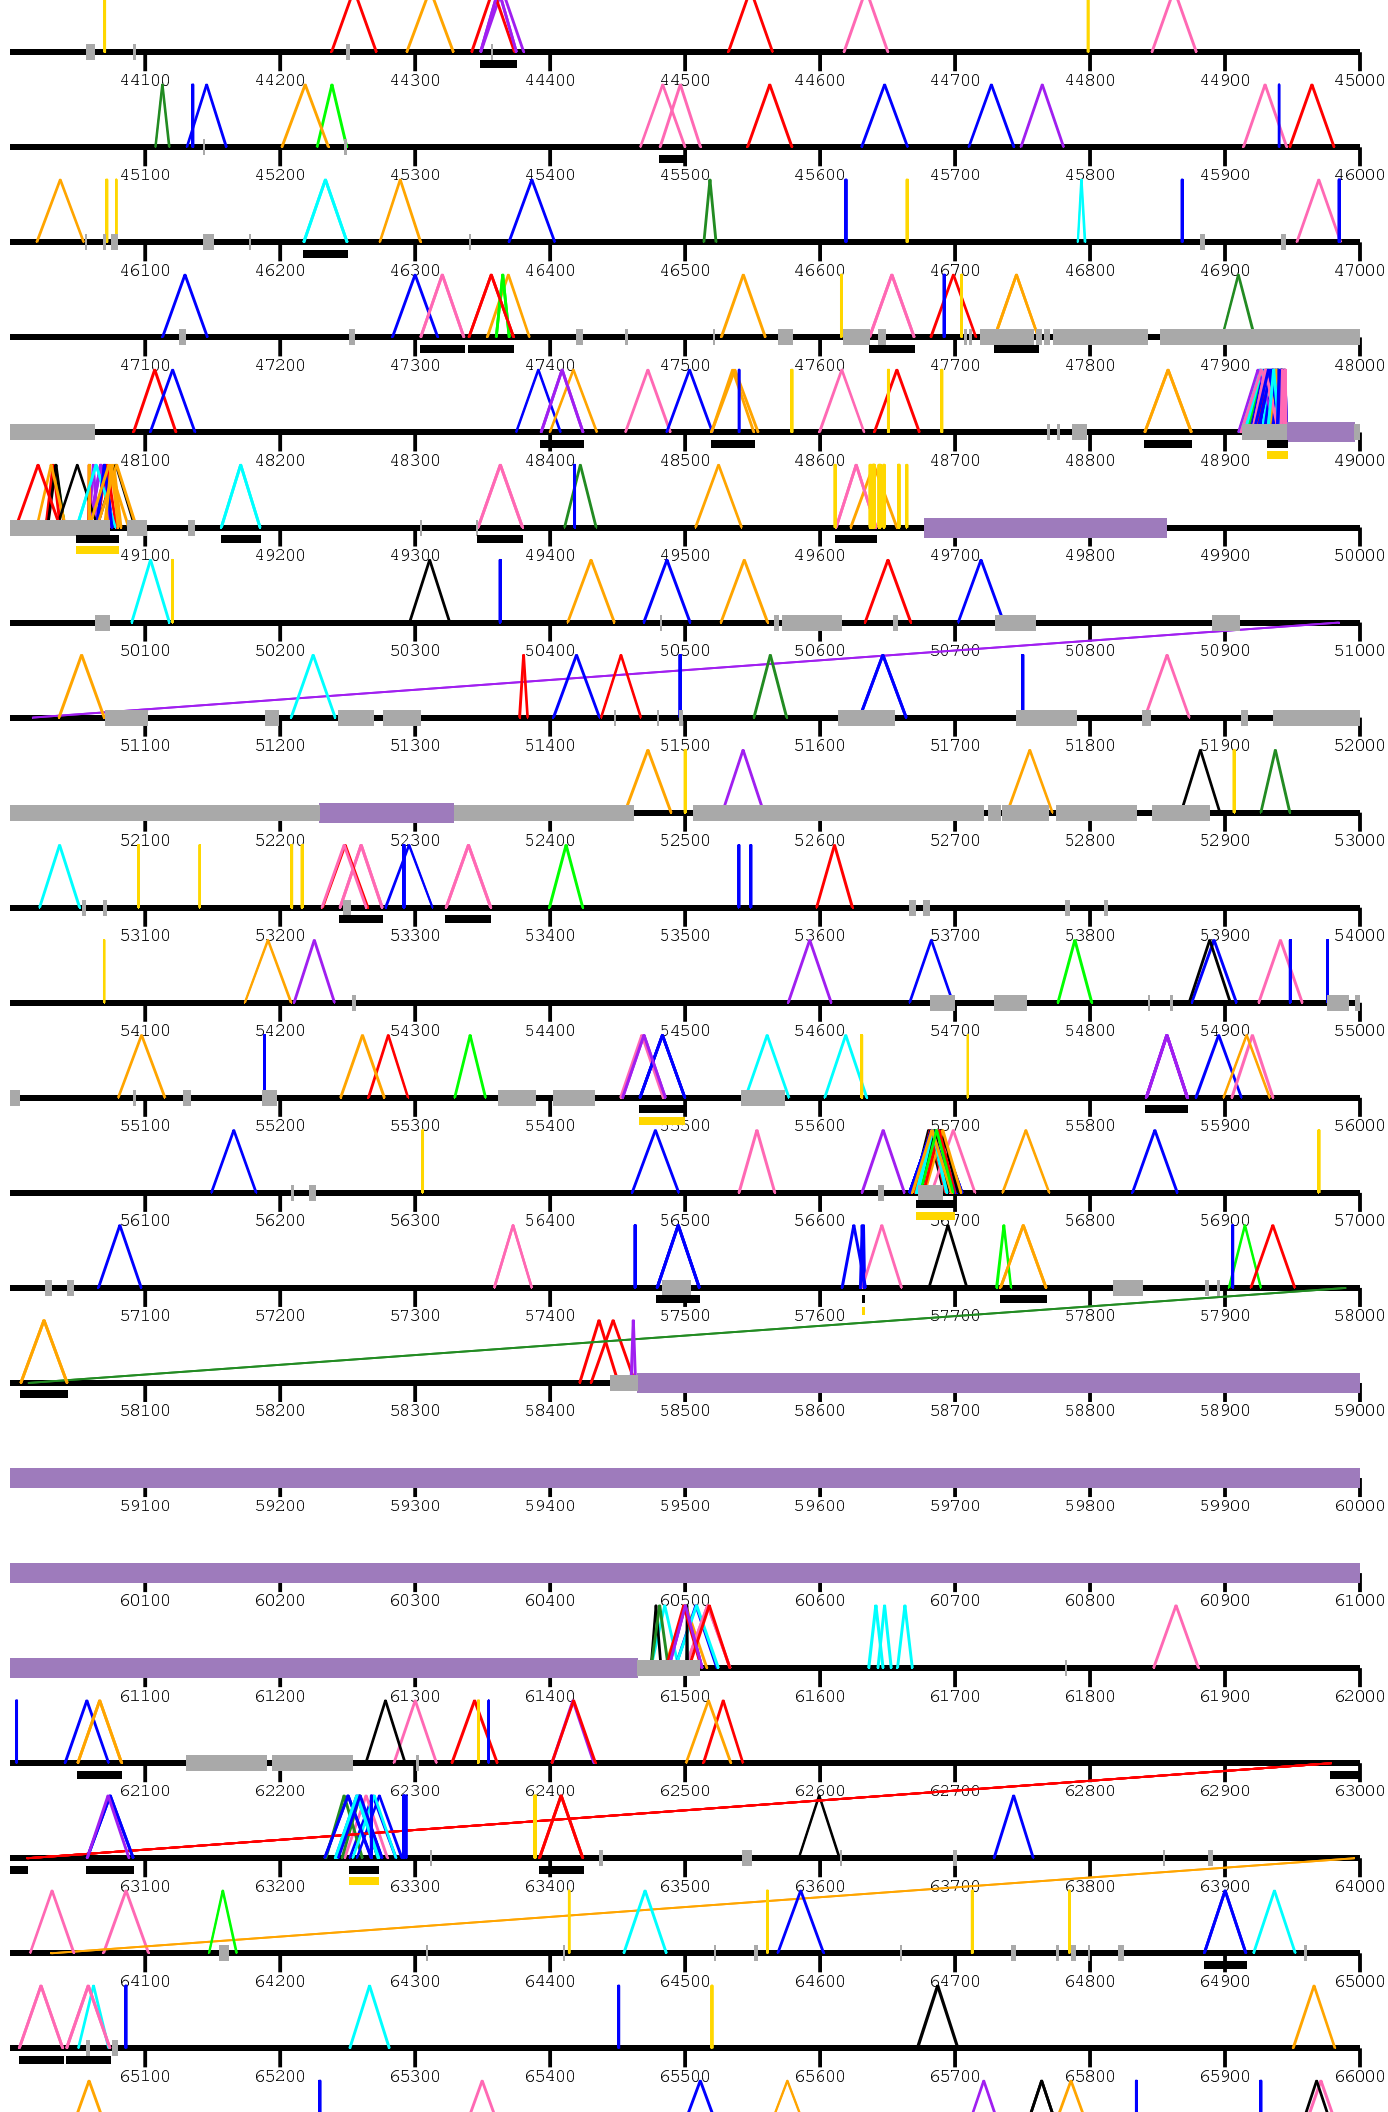



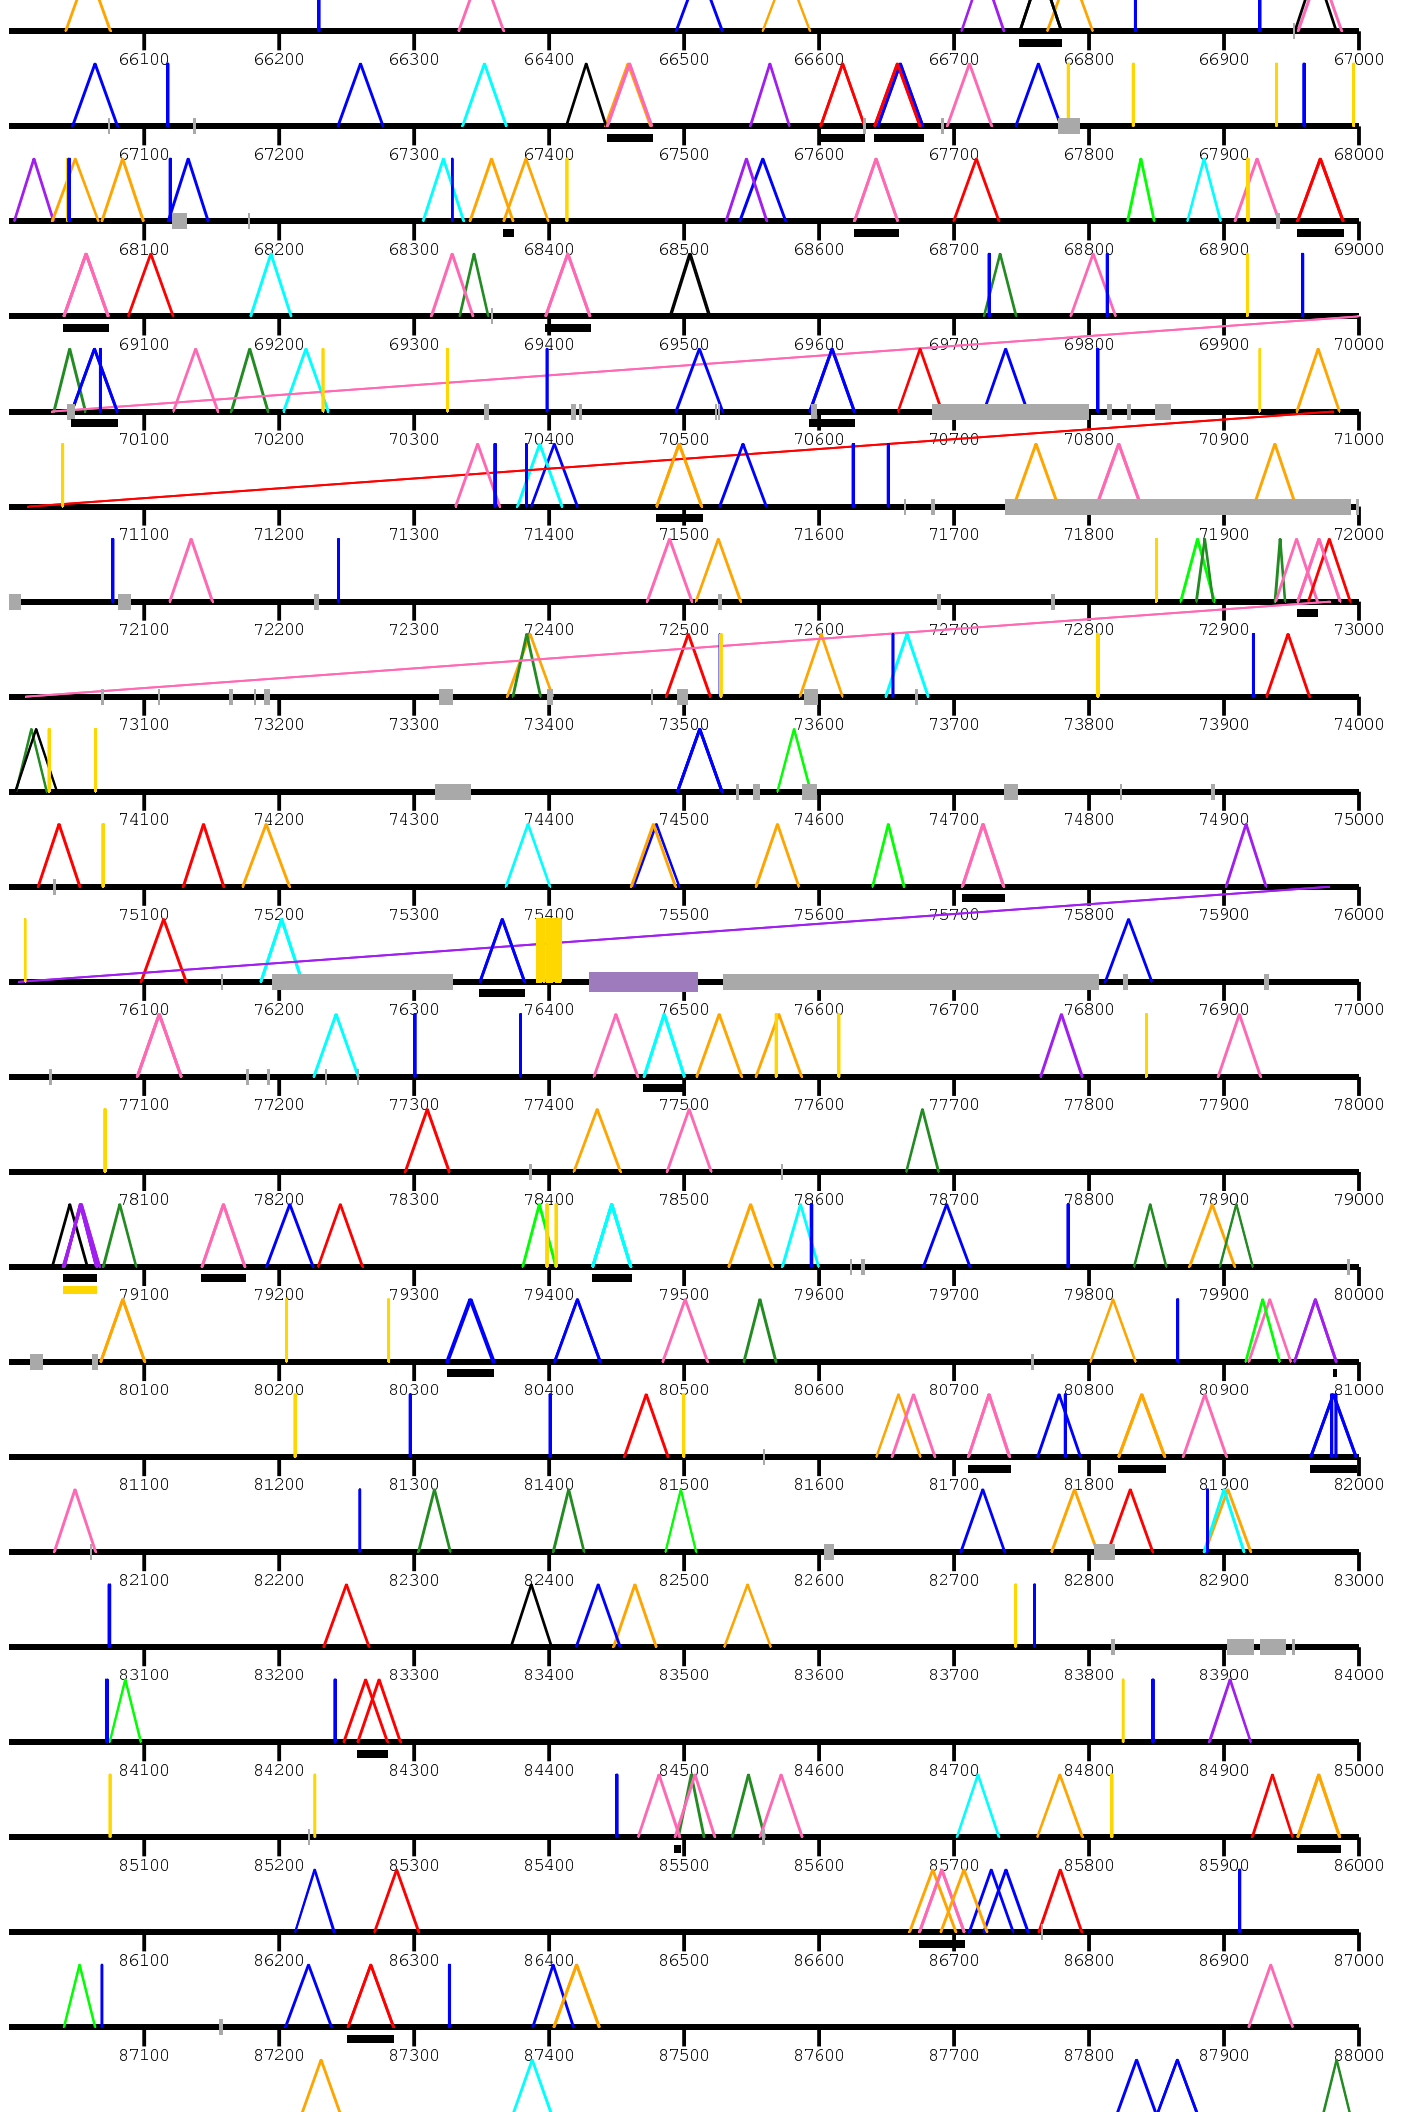

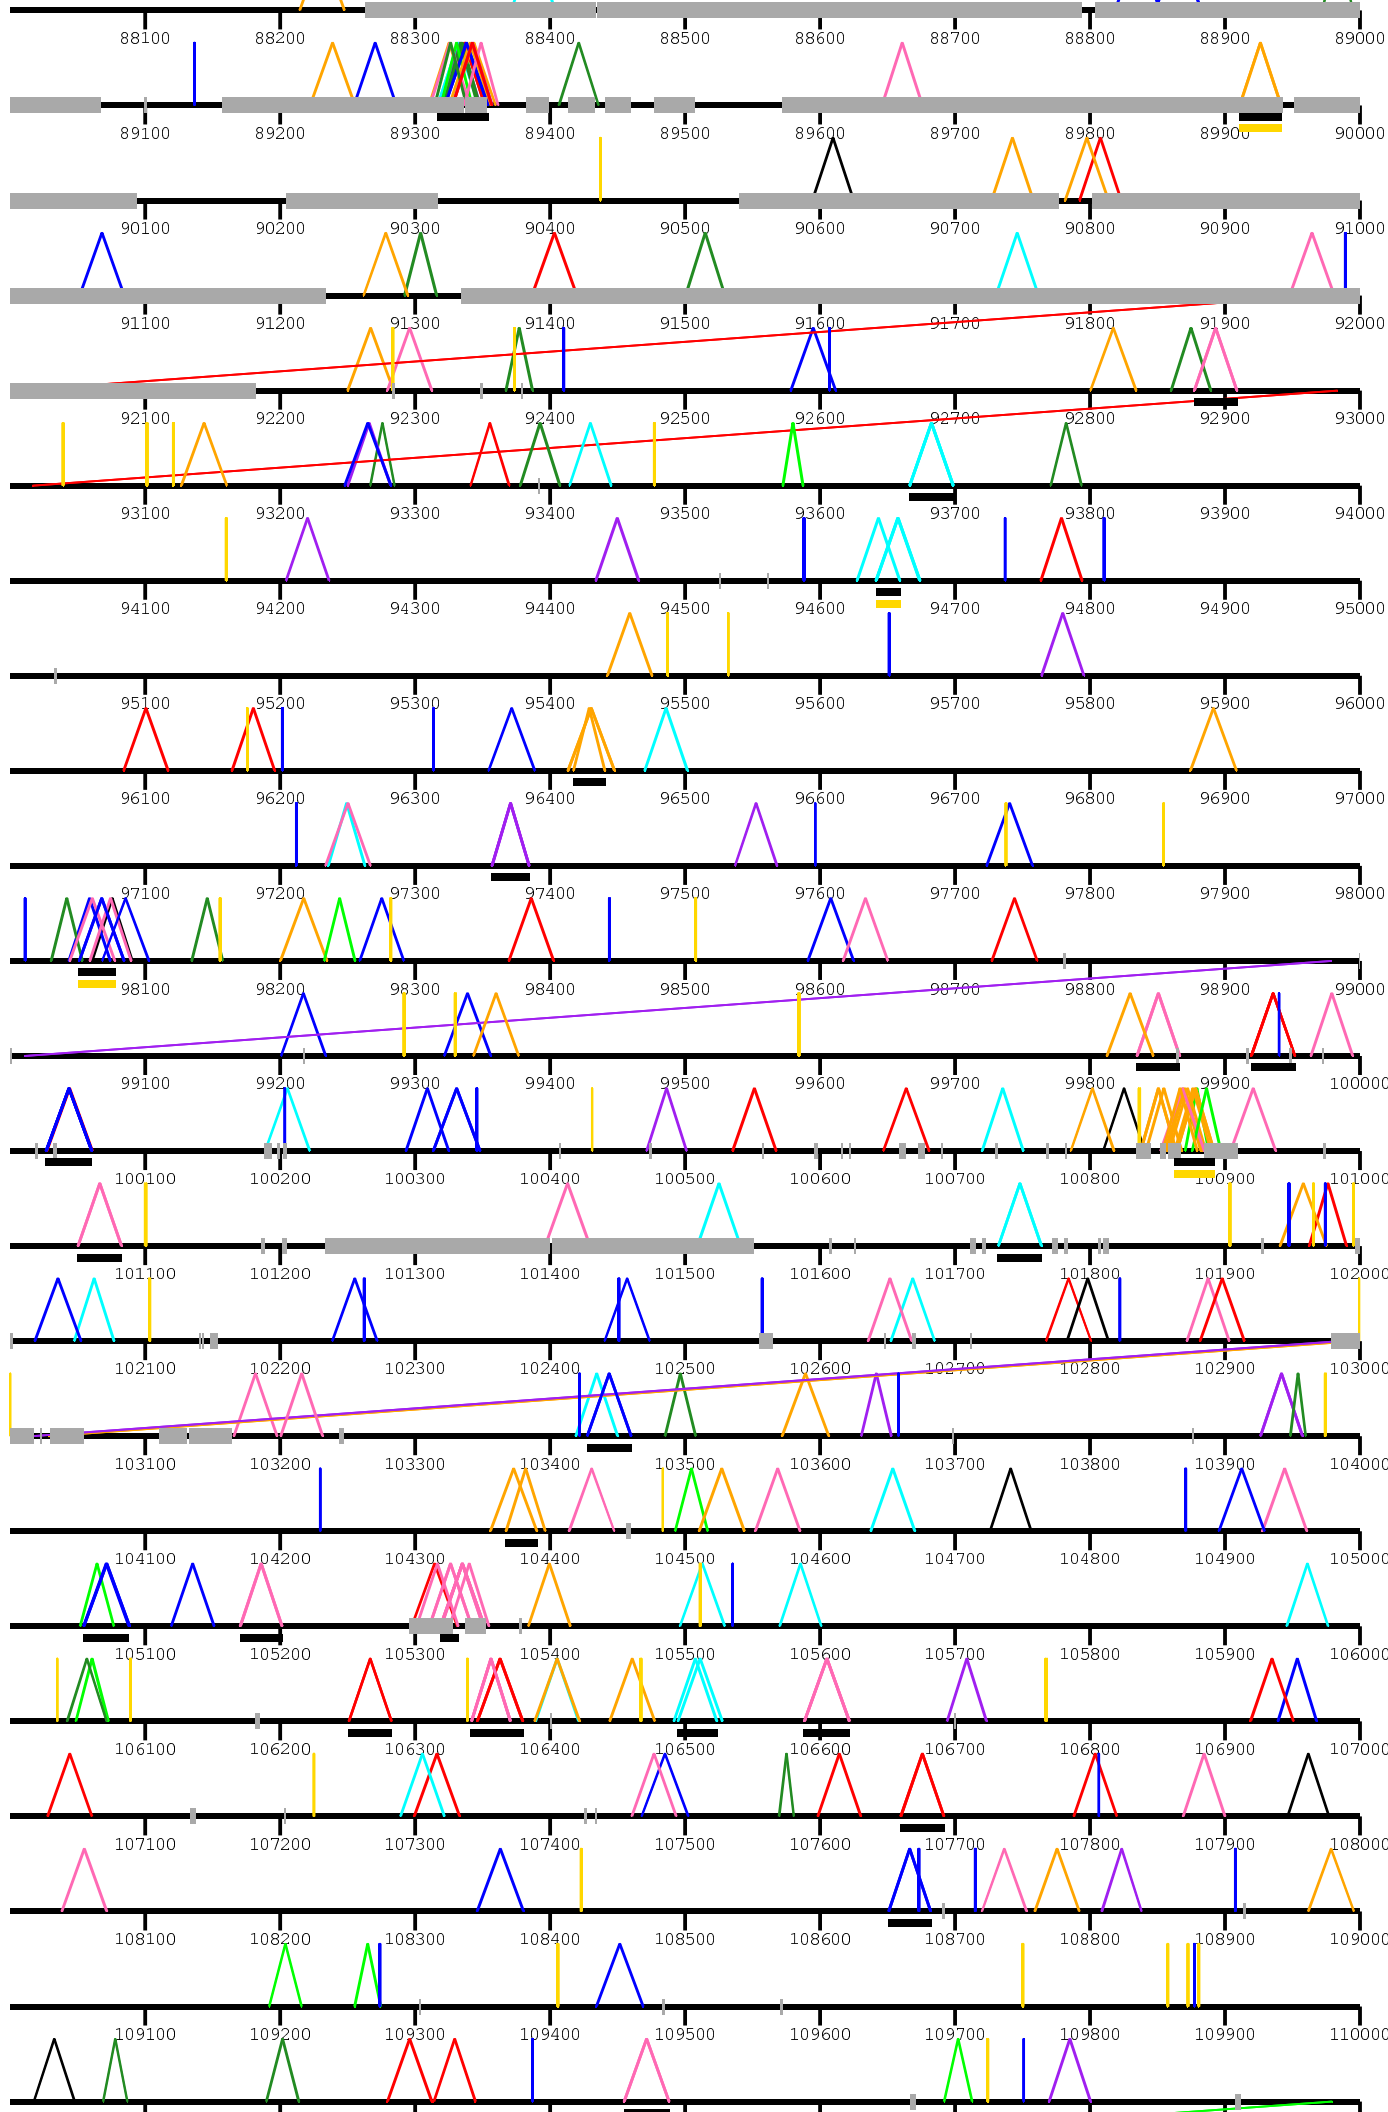

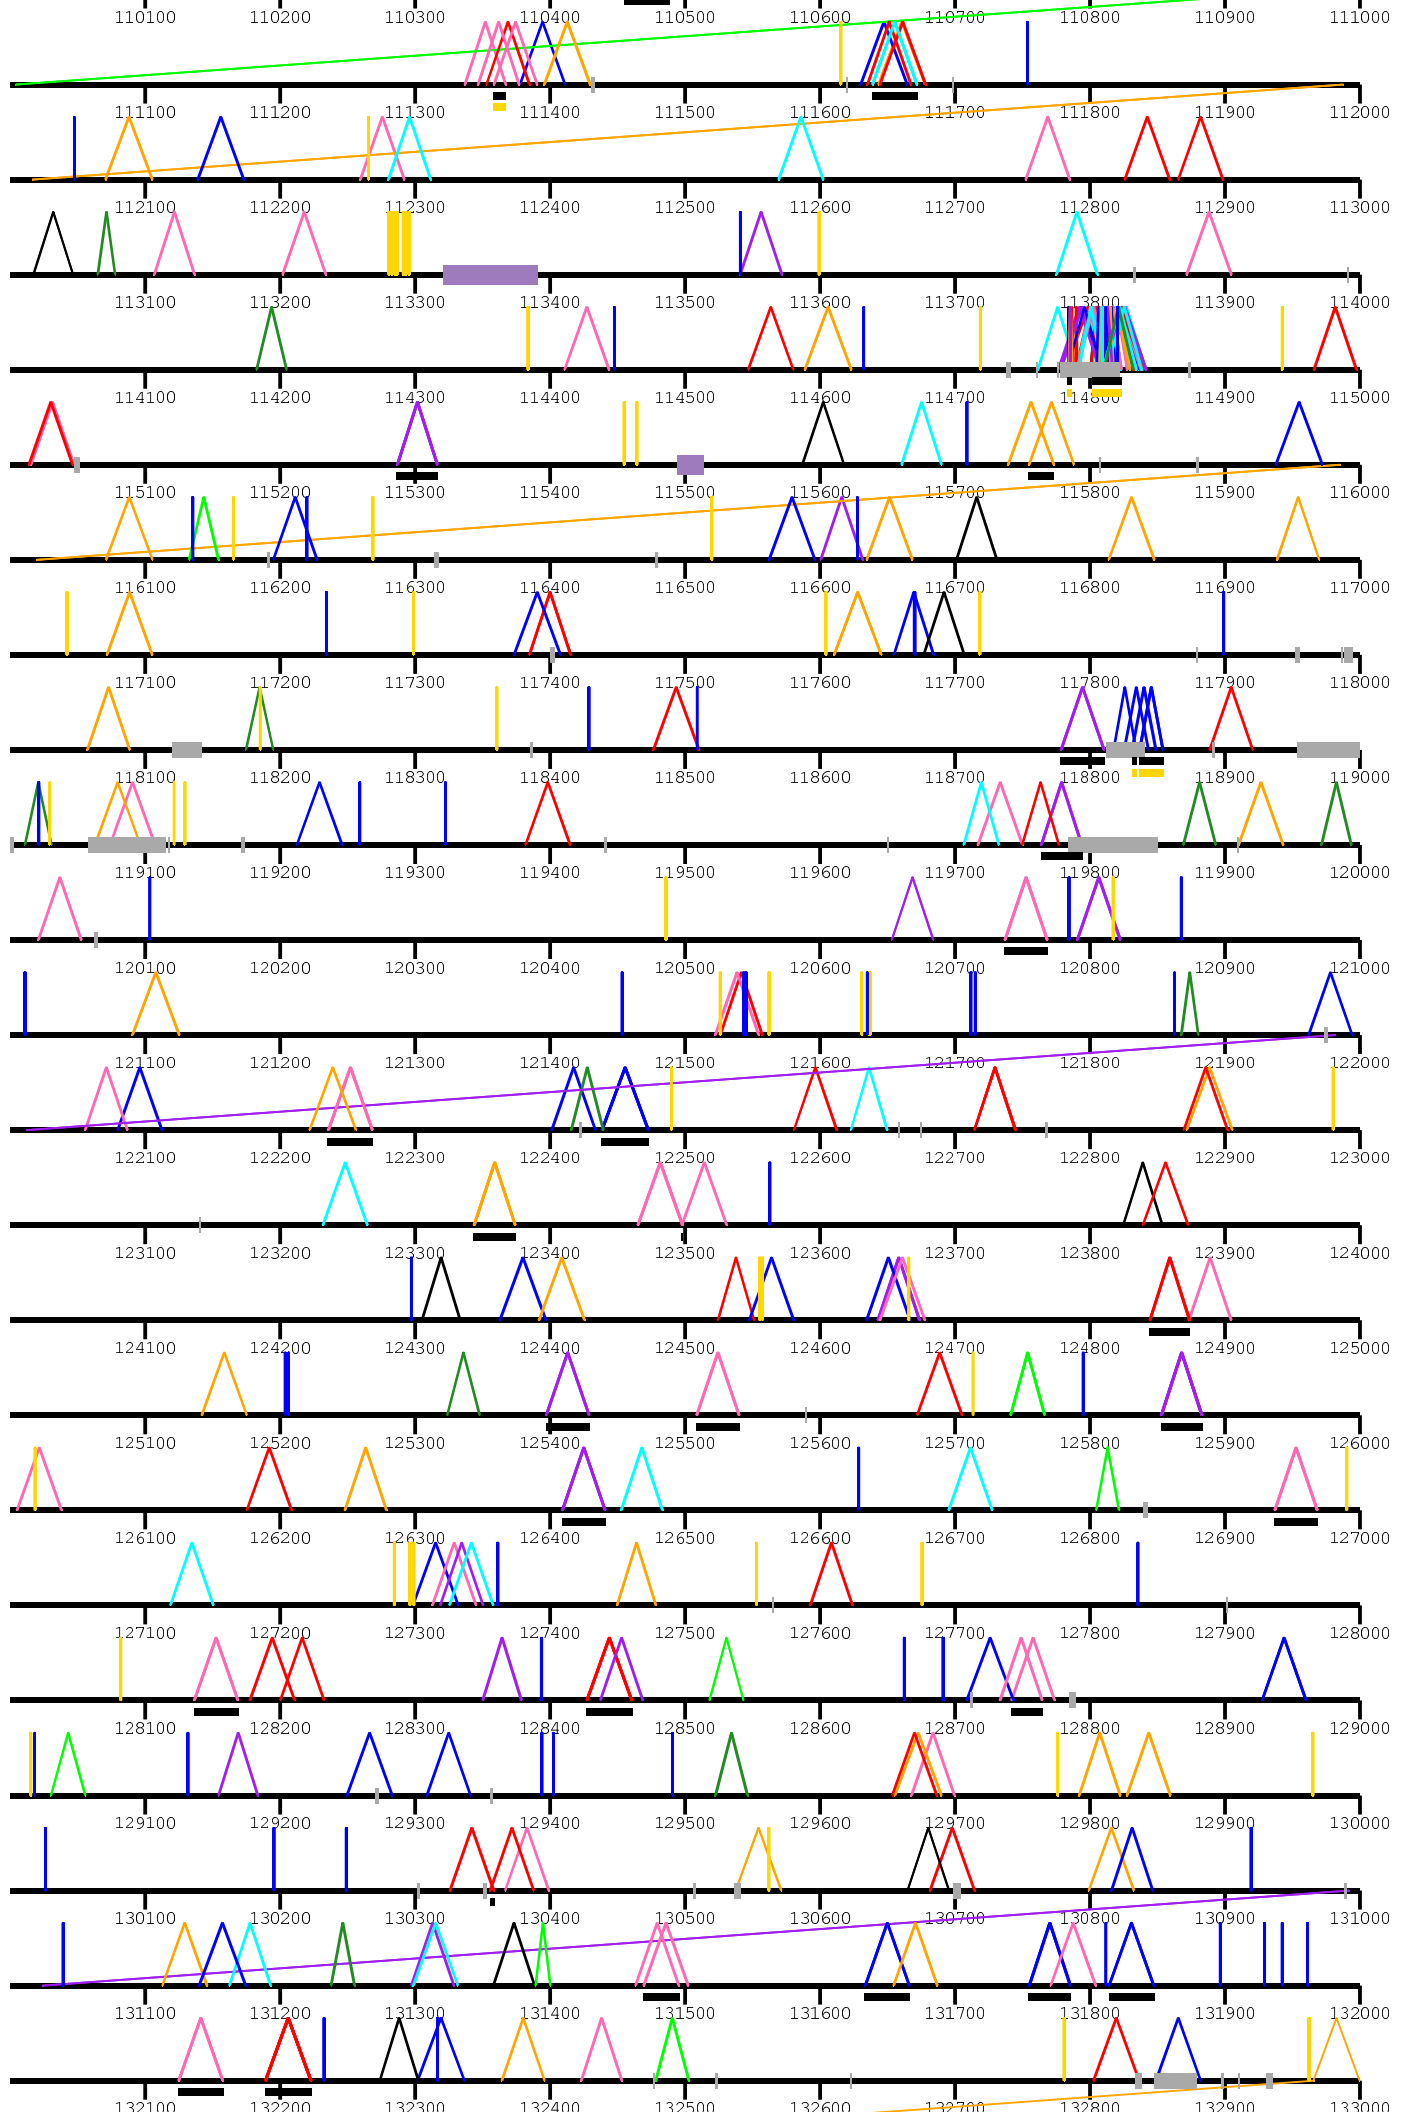

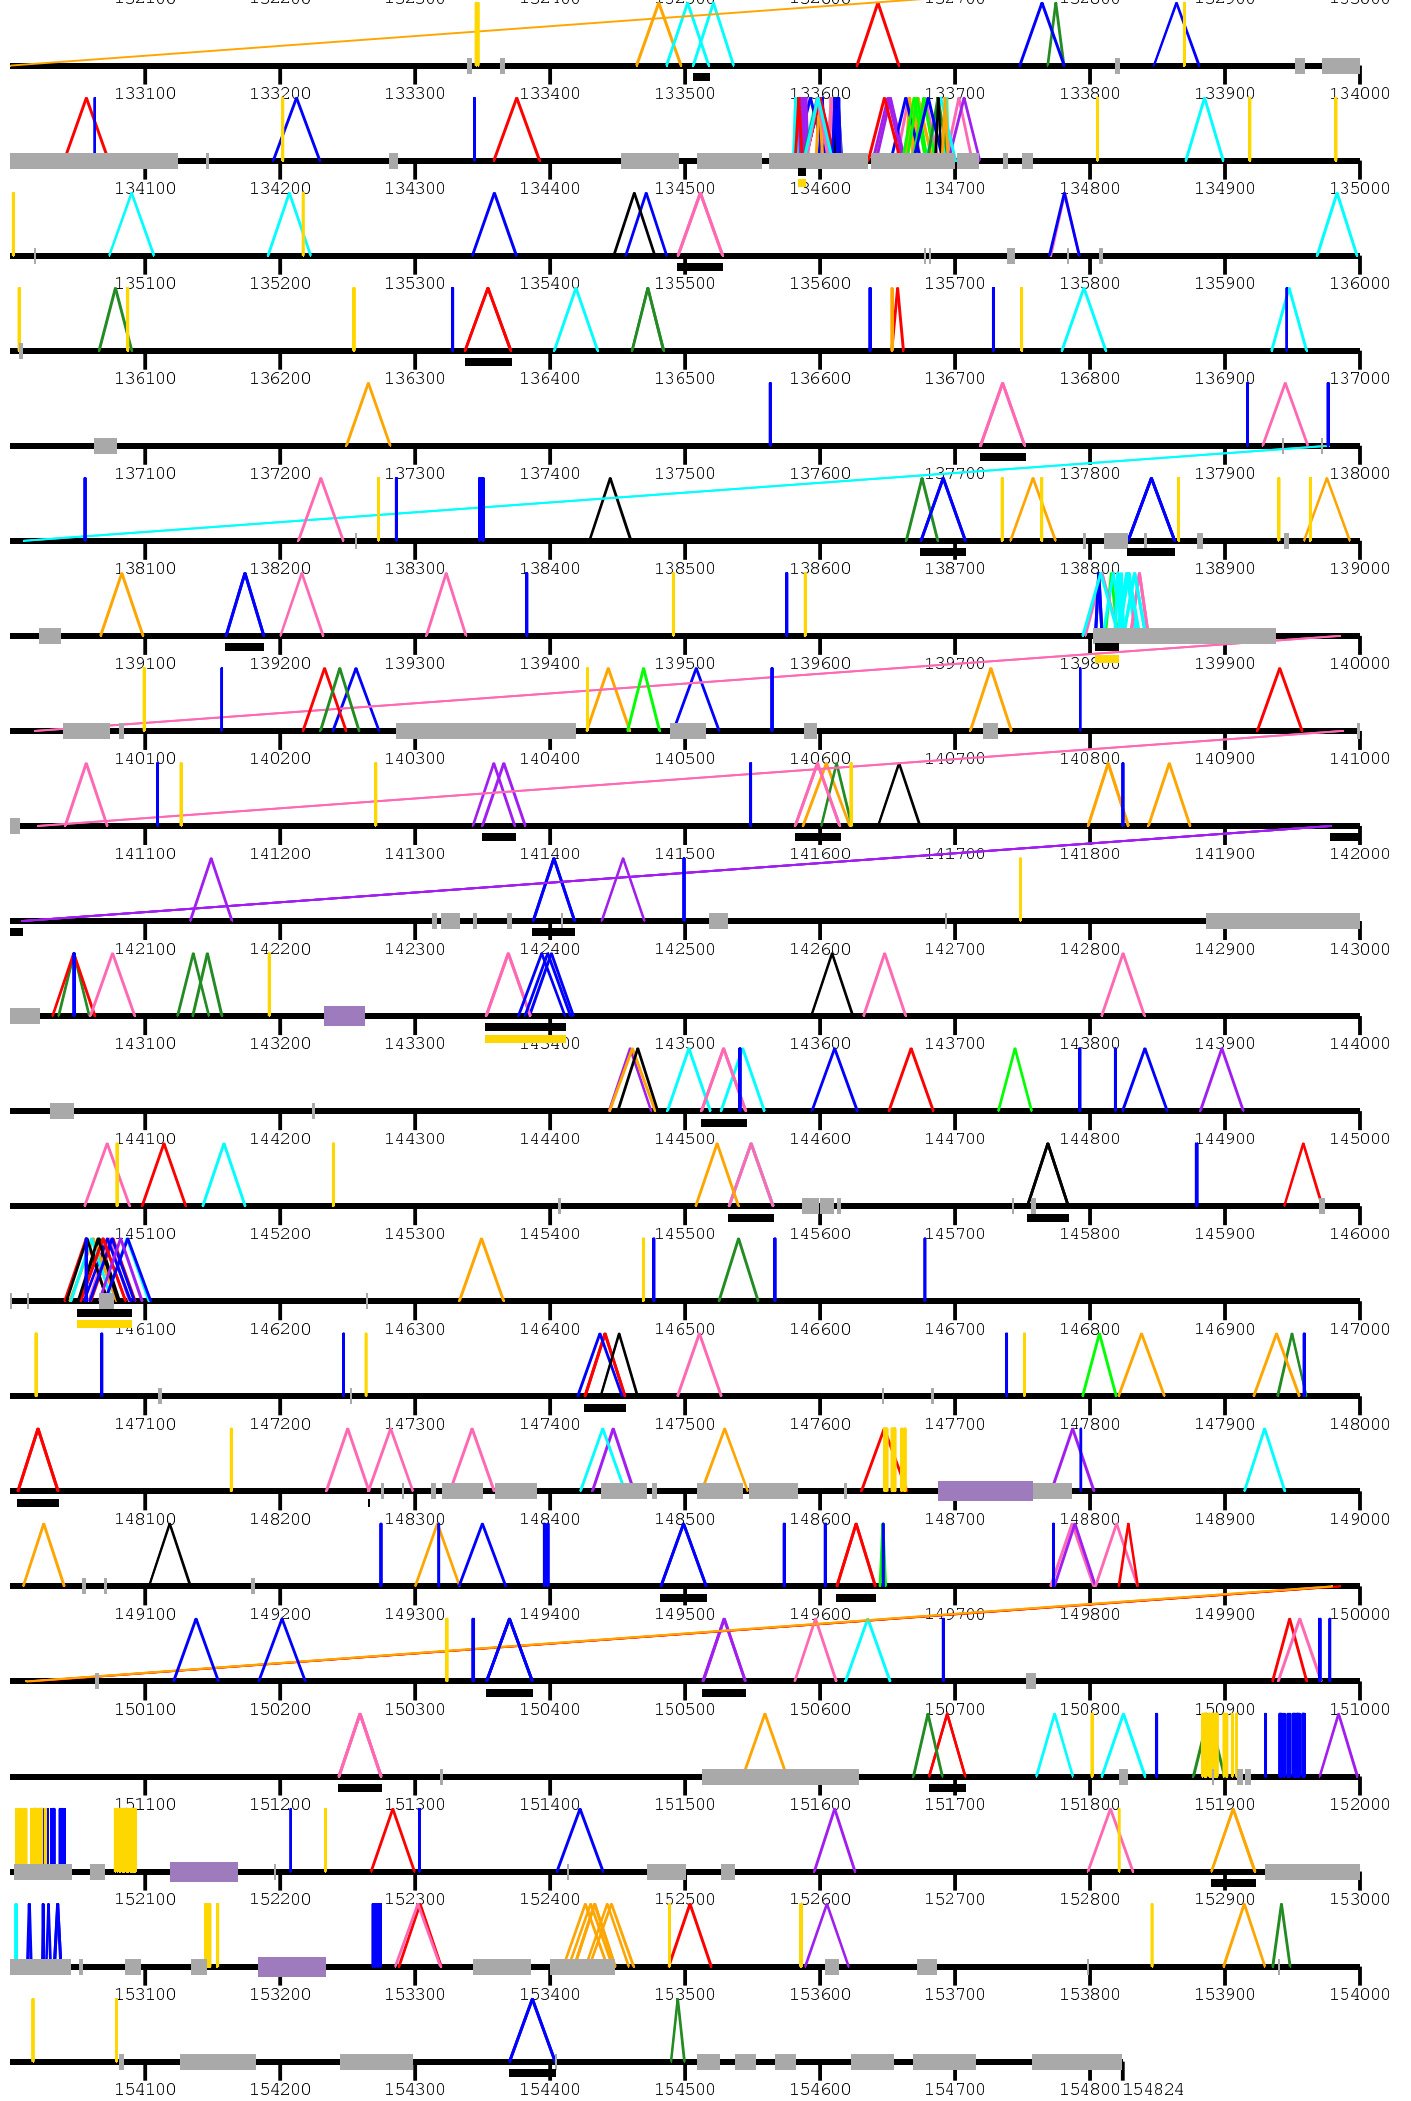

Supplement: 41586_2008_BFnature06862_MOESM226_ESM.pdf [file 41586_2008_BFnature06862_MOESM226_ESM.pdf]
